# Supplementary material
Source: HighWire-hosted journal article supplement (doi:10.1101/rna.067405.118)
Supplement: Supplemental_File_S1.xlsx [file Supplemental_File_S1.xlsx]

## Sheet: Key
Tab	Description
ce10_intron_dGnt	Free folding energy analysis of C. elegans introns (ce10 genome assembly)
cb4_intron_dGnt	Free folding energy analysis of C. briggsae introns (cb4 genome assembly)
Column	Description
Chr	Chromosome where intron occurs.
Start	Start coordinate.
Stop	End coordinate.
Name	Unique designation for each intron.
Strand	Strand from which the gene/intron is transcribed.
dG (kcal/mol)	Folding free energy predicted for the intron sequence at 20C.
dG/nt (kcal/mol*nt)	Folding free energy normalized to intron length.
5+ reads? (ce10 only)	Yes/no designation of whether the IR/TR overlaps a genomic region (strand-specific) covered by 5 or more reads in the RNAseq datasets used to define EERs in Reich et al. 2018.

## Sheet: ce10_intron_dGnt
Chr	Start	Stop	Name	Strand	dG (kcal/mol)	dG/nt (kcal/mol*nt)	5+ reads?
chrI	4358	5194	Y74C9A.3_4358_5194	-	-308.558	-0.369089	No
chrI	5296	6036	Y74C9A.3_5296_6036	-	-211.585	-0.285926	No
chrI	6327	9726	Y74C9A.3_6327_9726	-	-1376.22	-0.40489	YES
chrI	9846	10094	Y74C9A.3_9846_10094	-	-55.853	-0.225214	YES
chrI	10585	11617	Y74C9A.2_10585_11617	+	-378.727	-0.366984	YES
chrI	11689	14950	Y74C9A.2_11689_14950	+	-1557.21	-0.477525	YES
chrI	15160	16472	Y74C9A.2_15160_16472	+	-699.814	-0.533395	YES
chrI	16585	16701	Y74C9A.2_16585_16701	+	-20.034	-0.172707	YES
chrI	17958	18005	Y74C9A.4_17958_18005	-	-7.521	-0.160021	No
chrI	18115	19014	Y74C9A.4_18115_19014	-	-275.524	-0.306478	No
chrI	19241	20270	Y74C9A.4_19241_20270	-	-376.529	-0.365917	No
chrI	20478	20847	Y74C9A.4_20478_20847	-	-128.046	-0.347008	No
chrI	20964	21012	Y74C9A.4_20964_21012	-	-12.907	-0.268896	No
chrI	21139	24650	Y74C9A.4_21139_24650	-	-1371.42	-0.390607	No
chrI	24845	24928	Y74C9A.4_24845_24928	-	-18.347	-0.221048	No
chrI	25090	25272	Y74C9A.4_25090_25272	-	-47.915	-0.263269	No
chrI	25472	26370	Y74C9A.4_25472_26370	-	-303.134	-0.337566	YES
chrI	26524	26589	Y74C9A.4_26524_26589	-	-17.579	-0.270446	YES
chrI	26681	26732	Y74C9A.4_26681_26732	-	-13.432	-0.263373	YES
chrI	28109	28149	Y74C9A.5_28109_28149	-	-26.41	-0.66025	YES
chrI	28405	29099	Y74C9A.5_28405_29099	-	-175.695	-0.253163	No
chrI	29367	29768	Y74C9A.5_29367_29768	-	-120.583	-0.300706	No
chrI	30424	31768	Y74C9A.5_30424_31768	-	-463.01	-0.344501	No
chrI	32072	32411	Y74C9A.5_32072_32411	-	-127.758	-0.376867	YES
chrI	43961	44029	Y74C9A.1_43961_44029	+	-13.269	-0.195132	No
chrI	44234	44280	Y74C9A.1_44234_44280	+	-5.258	-0.114304	No
chrI	44324	44371	Y74C9A.1_44324_44371	+	-9.558	-0.203362	No
chrI	44468	44520	Y74C9A.1_44468_44520	+	-11.375	-0.21875	No
chrI	47610	47695	Y48G1C.12_47610_47695	+	-20.871	-0.245541	No
chrI	47858	48347	Y48G1C.12_47858_48347	+	-145.69	-0.297935	No
chrI	48530	49250	Y48G1C.12_48530_49250	+	-231.511	-0.321543	No
chrI	50016	50814	Y48G1C.4_50016_50814	+	-294.334	-0.36884	YES
chrI	51030	52282	Y48G1C.4_51030_52282	+	-833.716	-0.665907	No
chrI	52410	52465	Y48G1C.4_52410_52465	+	-15.882	-0.288764	No
chrI	52572	53265	Y48G1C.4_52572_53265	+	-246.964	-0.356369	No
chrI	53337	53390	Y48G1C.4_53337_53390	+	-20.102	-0.379283	No
chrI	53695	53943	Y48G1C.4_53695_53943	+	-80.42	-0.324274	No
chrI	55450	55889	Y48G1C.5_55450_55889	-	-129.891	-0.295879	No
chrI	56047	56123	Y48G1C.5_56047_56123	-	-24.242	-0.318974	No
chrI	56293	56536	Y48G1C.5_56293_56536	-	-82.075	-0.337757	No
chrI	56687	56871	Y48G1C.5_56687_56871	-	-57.299	-0.311408	No
chrI	57053	57256	Y48G1C.5_57053_57256	-	-85.044	-0.418936	No
chrI	57625	59044	Y48G1C.5_57625_59044	-	-498.547	-0.351337	No
chrI	60236	61235	Y48G1C.5_60236_61235	-	-395.745	-0.396141	No
chrI	62051	62773	Y48G1C.5_62051_62773	-	-263.899	-0.365511	No
chrI	62974	63796	Y48G1C.5_62974_63796	-	-476.682	-0.579905	No
chrI	63856	63903	Y48G1C.5_63856_63903	-	-6.72	-0.142979	No
chrI	63972	64017	Y48G1C.5_63972_64017	-	-10.843	-0.240956	No
chrI	71932	72510	Y48G1C.2_71932_72510	+	-177.683	-0.30741	YES
chrI	72590	72646	Y48G1C.2_72590_72646	+	-14.826	-0.26475	YES
chrI	72897	72940	Y48G1C.2_72897_72940	+	-13.163	-0.306116	YES
chrI	73017	73604	Y48G1C.2_73017_73604	+	-200.993	-0.342407	No
chrI	73766	74624	Y48G1C.2_73766_74624	+	-352.878	-0.41128	YES
chrI	74808	75170	Y48G1C.2_74808_75170	+	-103.231	-0.285169	No
chrI	75490	75950	Y48G1C.2_75490_75950	+	-120.582	-0.262135	No
chrI	76112	76948	Y48G1C.2_76112_76948	+	-309.748	-0.370512	YES
chrI	77153	77712	Y48G1C.2_77153_77712	+	-156.267	-0.279547	No
chrI	77799	79312	Y48G1C.2_77799_79312	+	-471.049	-0.311334	YES
chrI	79447	80305	Y48G1C.2_79447_80305	+	-273.621	-0.318906	No
chrI	80561	80813	Y48G1C.2_80561_80813	+	-75.237	-0.29856	YES
chrI	81272	81884	Y48G1C.10_81272_81884	+	-222.463	-0.363502	YES
chrI	81963	82015	Y48G1C.10_81963_82015	+	-20.036	-0.385308	No
chrI	82260	82587	Y48G1C.11_82260_82587	+	-92.706	-0.283505	YES
chrI	82676	83180	Y48G1C.10_82676_83180	+	-125.395	-0.2488	No
chrI	83420	84189	Y48G1C.10_83420_84189	+	-284.51	-0.369974	No
chrI	84313	84387	Y48G1C.10_84313_84387	+	-22.303	-0.301392	No
chrI	84567	84613	Y48G1C.10_84567_84613	+	-6.889	-0.149761	No
chrI	84738	84835	Y48G1C.11_84738_84835	+	-21.209	-0.218649	No
chrI	84985	86823	Y48G1C.11_84985_86823	+	-643.159	-0.349923	No
chrI	85354	85440	Y48G1C.6_85354_85440	-	-18.624	-0.216558	No
chrI	85621	86096	Y48G1C.6_85621_86096	-	-156.487	-0.329446	No
chrI	86904	87033	Y48G1C.11_86904_87033	+	-28.932	-0.224279	No
chrI	87223	87519	Y48G1C.11_87223_87519	+	-68.907	-0.232794	No
chrI	87734	88267	Y48G1C.11_87734_88267	+	-180.938	-0.339471	YES
chrI	88500	88565	Y48G1C.11_88500_88565	+	-8.89	-0.136769	No
chrI	88706	89371	Y48G1C.11_88706_89371	+	-209.756	-0.315423	No
chrI	89584	90418	Y48G1C.11_89584_90418	+	-255.042	-0.305806	No
chrI	90872	90967	Y48G1C.11_90872_90967	+	-33.704	-0.354779	No
chrI	91594	92522	Y48G1C.9_91594_92522	+	-318.802	-0.343537	YES
chrI	93136	93181	Y48G1C.1_93136_93181	+	-8.451	-0.1878	No
chrI	93556	93608	Y48G1C.1_93556_93608	+	-12.937	-0.248788	No
chrI	94015	94063	Y48G1C.1_94015_94063	+	-6.268	-0.130583	No
chrI	94208	94268	Y48G1C.1_94208_94268	+	-9.206	-0.153433	No
chrI	94568	94621	Y48G1C.1_94568_94621	+	-11.868	-0.223925	No
chrI	95118	95236	Y48G1C.13_95118_95236	-	-51.439	-0.435924	No
chrI	96992	97599	Y48G1C.7_96992_97599	-	-184.378	-0.303753	No
chrI	97960	98294	Y48G1C.7_97960_98294	-	-120.148	-0.359725	No
chrI	99058	99628	Y48G1C.7_99058_99628	-	-164.013	-0.287742	No
chrI	99789	100138	Y48G1C.7_99789_100138	-	-109.324	-0.313249	No
chrI	100338	100394	Y48G1C.7_100338_100394	-	-24.097	-0.430304	No
chrI	100625	101504	Y48G1C.7_100625_101504	-	-255.019	-0.290124	YES
chrI	101733	102447	Y48G1C.8_101733_102447	-	-285.624	-0.400034	YES
chrI	103216	104439	Y48G1C.8_103216_104439	-	-528.513	-0.432145	YES
chrI	104713	105435	Y48G1C.8_104713_105435	-	-293.63	-0.40669	YES
chrI	105621	106015	Y48G1C.8_105621_106015	-	-122.246	-0.310269	No
chrI	106455	106677	Y48G1C.8_106455_106677	-	-65.916	-0.296919	No
chrI	106819	107355	Y48G1C.8_106819_107355	-	-160.248	-0.29897	No
chrI	107548	107595	Y48G1C.8_107548_107595	-	-16.218	-0.345064	No
chrI	109446	109491	F53G12.1_109446_109491	-	-5.288	-0.117511	YES
chrI	109783	109834	F53G12.1_109783_109834	-	-10.327	-0.20249	YES
chrI	109956	110004	F53G12.1_109956_110004	-	-7.805	-0.162604	YES
chrI	111065	111160	F53G12.10_111065_111160	+	-25.381	-0.267168	YES
chrI	111260	111509	F53G12.10_111260_111509	+	-77.192	-0.310008	YES
chrI	111707	111754	F53G12.10_111707_111754	+	-11.133	-0.236872	YES
chrI	111971	112018	F53G12.10_111971_112018	+	-10.157	-0.216106	YES
chrI	112267	112411	F53G12.10_112267_112411	+	-50.402	-0.350014	YES
chrI	112481	112526	F53G12.9_112481_112526	+	-8.642	-0.192044	No
chrI	112652	112699	F53G12.9_112652_112699	+	-8.653	-0.184106	No
chrI	112903	113238	F53G12.13_112903_113238	+	-115.576	-0.345003	No
chrI	113382	113425	F53G12.13_113382_113425	+	-16.213	-0.377047	No
chrI	113527	113595	F53G12.13_113527_113595	+	-27.332	-0.401941	No
chrI	113863	114084	F53G12.8_113863_114084	+	-72.35	-0.327376	No
chrI	114423	114543	F53G12.8_114423_114543	+	-34.021	-0.283508	No
chrI	115915	116431	F53G12.7_115915_116431	+	-141.05	-0.273353	No
chrI	116666	116718	F53G12.7_116666_116718	+	-14.871	-0.285981	No
chrI	116974	117085	F53G12.7_116974_117085	+	-25.456	-0.229333	No
chrI	118208	118552	F53G12.6_118208_118552	+	-92.83	-0.269855	No
chrI	118953	119570	F53G12.6_118953_119570	+	-220.355	-0.357139	No
chrI	119900	119945	F53G12.6_119900_119945	+	-6.415	-0.142556	No
chrI	120185	120241	F53G12.6_120185_120241	+	-13.191	-0.235554	No
chrI	120378	120487	F53G12.6_120378_120487	+	-34.9	-0.320183	No
chrI	120710	120762	F53G12.6_120710_120762	+	-13.32	-0.256154	No
chrI	127336	127384	F53G12.5_127336_127384	+	-9.771	-0.203563	No
chrI	127436	128696	F53G12.5_127436_128696	+	-383.738	-0.304554	YES
chrI	128896	128944	F53G12.5_128896_128944	+	-6.125	-0.127604	YES
chrI	129124	129166	F53G12.5_129124_129166	+	-16.512	-0.393143	YES
chrI	129333	132102	F53G12.5_129333_132102	+	-1042.47	-0.376479	YES
chrI	132553	132611	F53G12.5_132553_132611	+	-13.266	-0.228724	No
chrI	132693	133413	F53G12.5_132693_133413	+	-213.751	-0.296876	YES
chrI	134428	134505	F53G12.4_134428_134505	+	-15.962	-0.207299	No
chrI	134581	135548	F53G12.4_134581_135548	+	-410.292	-0.424294	No
chrI	135898	136234	F53G12.4_135898_136234	+	-125.808	-0.374429	No
chrI	136712	137208	F53G12.4_136712_137208	+	-186.381	-0.375768	No
chrI	137886	138016	F53G12.3_137886_138016	+	-51.678	-0.397523	No
chrI	138143	138192	F53G12.3_138143_138192	+	-13.833	-0.282306	No
chrI	138351	138392	F53G12.3_138351_138392	+	-6.148	-0.149951	No
chrI	138782	138828	F53G12.3_138782_138828	+	-6.01	-0.130652	No
chrI	139032	139079	F53G12.3_139032_139079	+	-7.333	-0.156021	No
chrI	139331	139377	F53G12.3_139331_139377	+	-9.608	-0.20887	No
chrI	139669	139768	F53G12.3_139669_139768	+	-19.607	-0.198051	No
chrI	139982	140135	F53G12.3_139982_140135	+	-42.909	-0.280451	No
chrI	140292	140370	F53G12.3_140292_140370	+	-21.274	-0.272744	No
chrI	140496	140553	F53G12.3_140496_140553	+	-12.346	-0.216596	No
chrI	140870	140915	F53G12.3_140870_140915	+	-12.156	-0.270133	No
chrI	141213	141680	F53G12.3_141213_141680	+	-136.391	-0.292058	No
chrI	141854	141899	F53G12.3_141854_141899	+	-8.371	-0.186022	No
chrI	142023	142066	F53G12.3_142023_142066	+	-9.46	-0.22	No
chrI	142230	142277	F53G12.3_142230_142277	+	-6.798	-0.144638	No
chrI	142477	142546	F53G12.3_142477_142546	+	-12.181	-0.176536	No
chrI	142671	142728	F53G12.3_142671_142728	+	-18.57	-0.325789	No
chrI	142939	143006	F53G12.3_142939_143006	+	-13.576	-0.202627	No
chrI	143684	144264	F53G12.3_143684_144264	+	-163.614	-0.282093	No
chrI	144396	144439	F53G12.3_144396_144439	+	-13.637	-0.31714	No
chrI	146748	146792	F56C11.1_146748_146792	-	-11.196	-0.254455	No
chrI	146924	147053	F56C11.1_146924_147053	-	-46.014	-0.356698	No
chrI	147731	147783	F56C11.1_147731_147783	-	-12.663	-0.243519	No
chrI	147994	148098	F56C11.1_147994_148098	-	-15.209	-0.14624	No
chrI	148223	149059	F56C11.1_148223_149059	-	-250.543	-0.299693	No
chrI	149259	149302	F56C11.1_149259_149302	-	-8.398	-0.195302	No
chrI	149472	149519	F56C11.1_149472_149519	-	-10.172	-0.216426	No
chrI	149817	150390	F56C11.1_149817_150390	-	-195.862	-0.341818	No
chrI	150688	150733	F56C11.1_150688_150733	-	-10.817	-0.240378	No
chrI	151182	151226	F56C11.1_151182_151226	-	-9.371	-0.212977	No
chrI	151383	151460	F56C11.1_151383_151460	-	-12.993	-0.16874	No
chrI	151674	152068	F56C11.1_151674_152068	-	-120.556	-0.30598	No
chrI	152360	152406	F56C11.1_152360_152406	-	-9.837	-0.213848	No
chrI	152658	152705	F56C11.1_152658_152705	-	-5.466	-0.116298	No
chrI	152909	152955	F56C11.1_152909_152955	-	-10.78	-0.234348	No
chrI	153345	153394	F56C11.1_153345_153394	-	-6.835	-0.13949	No
chrI	153553	153602	F56C11.1_153553_153602	-	-17.03	-0.347551	No
chrI	153680	154758	F56C11.1_153680_154758	-	-366.688	-0.340156	No
chrI	160546	160711	F56C11.2_160546_160711	-	-50.984	-0.308994	No
chrI	160999	161596	F56C11.2_160999_161596	-	-180.673	-0.302635	No
chrI	161889	162367	F56C11.2_161889_162367	-	-117.536	-0.245891	No
chrI	162597	162644	F56C11.2_162597_162644	-	-8.224	-0.174979	No
chrI	162717	163098	F56C11.2_162717_163098	-	-115.495	-0.303136	No
chrI	163430	163499	F56C11.2_163430_163499	-	-22.913	-0.332072	No
chrI	163608	163808	F56C11.2_163608_163808	-	-63.32	-0.3166	No
chrI	164203	164676	F56C11.2_164203_164676	-	-139.263	-0.294425	No
chrI	164765	164899	F56C11.2_164765_164899	-	-36.247	-0.2705	No
chrI	165008	165376	F56C11.2_165008_165376	-	-134.794	-0.366288	No
chrI	165487	165542	F56C11.2_165487_165542	-	-15.773	-0.286782	No
chrI	165660	166001	F56C11.2_165660_166001	-	-87.825	-0.257551	No
chrI	166104	166746	F56C11.2_166104_166746	-	-207.728	-0.323564	No
chrI	173508	173560	F56C11.6_173508_173560	+	-9.382	-0.180423	YES
chrI	173725	173774	F56C11.6_173725_173774	+	-13.219	-0.269776	No
chrI	174312	174604	F56C11.6_174312_174604	+	-94.145	-0.322414	No
chrI	174832	174877	F56C11.6_174832_174877	+	-11.263	-0.250289	No
chrI	175053	175096	F56C11.6_175053_175096	+	-18.335	-0.426395	No
chrI	175241	175578	F56C11.6_175241_175578	+	-113.695	-0.337374	YES
chrI	175708	175754	F56C11.6_175708_175754	+	-11.18	-0.243043	YES
chrI	178620	180599	F56C11.5_178620_180599	+	-598.202	-0.302275	YES
chrI	180698	181250	F56C11.5_180698_181250	+	-227.624	-0.412362	YES
chrI	181514	181662	F56C11.5_181514_181662	+	-35.048	-0.236811	No
chrI	181767	181813	F56C11.5_181767_181813	+	-9.672	-0.210261	No
chrI	182345	182393	F56C11.3_182345_182393	-	-5.989	-0.124771	No
chrI	182500	182544	F56C11.3_182500_182544	-	-3.974	-0.0903182	No
chrI	182616	182671	F56C11.3_182616_182671	-	-12.088	-0.219782	No
chrI	183456	183506	F56C11.4_183456_183506	+	-13.179	-0.26358	No
chrI	183629	183724	F56C11.4_183629_183724	+	-21.287	-0.224074	No
chrI	189211	189644	K10E9.1_189211_189644	+	-130.773	-0.302016	No
chrI	189921	190556	K10E9.1_189921_190556	+	-229.895	-0.362039	YES
chrI	191067	191177	K10E9.1_191067_191177	+	-29.503	-0.268209	No
chrI	191299	191581	K10E9.1_191299_191581	+	-119.517	-0.423819	No
chrI	191725	191778	K10E9.1_191725_191778	+	-13.169	-0.248472	No
chrI	191858	192691	K10E9.1_191858_192691	+	-307.054	-0.368612	No
chrI	193095	193588	K10E9.1_193095_193588	+	-128.356	-0.260357	No
chrI	193934	194709	K10E9.1_193934_194709	+	-262.107	-0.338203	No
chrI	194798	195019	K10E9.1_194798_195019	+	-78.362	-0.354579	No
chrI	195215	195356	K10E9.1_195215_195356	+	-39.609	-0.280915	No
chrI	195523	196082	K10E9.1_195523_196082	+	-174.708	-0.312537	No
chrI	196333	197204	K10E9.1_196333_197204	+	-341.802	-0.392425	No
chrI	197653	197958	K10E9.1_197653_197958	+	-94.394	-0.309489	No
chrI	198073	200046	K10E9.1_198073_200046	+	-1027.02	-0.520537	YES
chrI	200503	201302	K10E9.1_200503_201302	+	-443.353	-0.554885	YES
chrI	201693	202123	K10E9.1_201693_202123	+	-142.634	-0.331707	No
chrI	203358	204261	Y48G1BL.2_203358_204261	+	-355.213	-0.39337	No
chrI	204685	205073	Y48G1BL.2_204685_205073	+	-111.288	-0.286825	No
chrI	205218	205299	Y48G1BL.2_205218_205299	+	-16.905	-0.208704	No
chrI	205597	206419	Y48G1BL.2_205597_206419	+	-437.395	-0.532111	No
chrI	206591	206692	Y48G1BL.2_206591_206692	+	-31.25	-0.309406	No
chrI	206781	207060	Y48G1BL.2_206781_207060	+	-79.797	-0.286011	No
chrI	207311	207703	Y48G1BL.2_207311_207703	+	-89.117	-0.227339	No
chrI	209550	209957	Y48G1BL.7_209550_209957	+	-110.263	-0.270916	No
chrI	210100	210151	Y48G1BL.7_210100_210151	+	-15.534	-0.304588	No
chrI	210329	211069	Y48G1BL.7_210329_211069	+	-269.065	-0.363601	No
chrI	211176	211256	Y48G1BL.7_211176_211256	+	-35.245	-0.440563	No
chrI	211384	211494	Y48G1BL.7_211384_211494	+	-38.005	-0.3455	No
chrI	212496	213523	Y48G1BL.3_212496_213523	-	-347.485	-0.33835	No
chrI	214186	214857	Y48G1BL.3_214186_214857	-	-276.897	-0.412663	No
chrI	215316	215386	Y48G1BL.3_215316_215386	-	-10.931	-0.156157	No
chrI	216092	216144	Y48G1BL.1_216092_216144	+	-7.605	-0.14625	No
chrI	216277	216330	Y48G1BL.1_216277_216330	+	-6.714	-0.126679	No
chrI	216910	218109	Y48G1BL.1_216910_218109	+	-382.859	-0.319315	No
chrI	217261	217305	Y48G1BL.4_217261_217305	-	-11.907	-0.270614	No
chrI	218205	218771	Y48G1BL.1_218205_218771	+	-162.975	-0.287942	No
chrI	219828	220003	Y48G1BL.5_219828_220003	-	-54.703	-0.312589	No
chrI	220107	220222	Y48G1BL.5_220107_220222	-	-53.982	-0.469409	No
chrI	220350	220397	Y48G1BL.5_220350_220397	-	-11.625	-0.24734	No
chrI	221447	221497	Y48G1BL.6_221447_221497	-	-8.936	-0.17872	No
chrI	232193	233278	Y48G1BM.6_232193_233278	-	-312.142	-0.287688	No
chrI	233418	233465	Y48G1BM.6_233418_233465	-	-10.836	-0.230553	No
chrI	233573	233625	Y48G1BM.6_233573_233625	-	-11.262	-0.216577	No
chrI	233733	233782	Y48G1BM.6_233733_233782	-	-16.603	-0.338837	No
chrI	233983	234037	Y48G1BM.6_233983_234037	-	-10.671	-0.197611	No
chrI	234997	235225	Y48G1BM.6_234997_235225	-	-73.146	-0.320816	YES
chrI	236052	236146	Y48G1BM.6_236052_236146	-	-22.728	-0.241787	No
chrI	236444	236519	Y48G1BM.6_236444_236519	-	-18.641	-0.248547	No
chrI	236763	237530	Y48G1BM.6_236763_237530	-	-250.074	-0.326042	No
chrI	237596	237720	Y48G1BM.6_237596_237720	-	-35.349	-0.285073	No
chrI	237853	238059	Y48G1BM.6_237853_238059	-	-66.533	-0.322976	No
chrI	238772	238842	Y48G1BM.7_238772_238842	-	-17.282	-0.246886	No
chrI	240532	242320	Y48G1BM.2_240532_242320	+	-582.505	-0.325786	No
chrI	242419	242851	Y48G1BM.2_242419_242851	+	-127.776	-0.295778	No
chrI	243078	243471	Y48G1BM.2_243078_243471	+	-134.344	-0.341842	No
chrI	243608	243701	Y48G1BM.2_243608_243701	+	-26.753	-0.287667	No
chrI	244062	244489	Y48G1BM.2_244062_244489	+	-131.717	-0.308471	No
chrI	248899	248957	Y48G1BM.8_248899_248957	-	-10.556	-0.182	No
chrI	249050	249494	Y48G1BM.8_249050_249494	-	-162.537	-0.366074	No
chrI	249587	249674	Y48G1BM.8_249587_249674	-	-20.002	-0.229908	No
chrI	249869	251205	Y48G1BM.8_249869_251205	-	-575.277	-0.430597	YES
chrI	251406	251475	Y48G1BM.8_251406_251475	-	-9.791	-0.141899	No
chrI	252183	252235	Y48G1BM.1_252183_252235	+	-7.605	-0.14625	No
chrI	252370	252423	Y48G1BM.1_252370_252423	+	-6.714	-0.126679	No
chrI	253053	253301	Y48G1BM.1_253053_253301	+	-82.775	-0.33377	No
chrI	253469	253707	Y48G1BM.1_253469_253707	+	-52.951	-0.222483	No
chrI	253803	253945	Y48G1BM.1_253803_253945	+	-36.092	-0.254169	No
chrI	254802	254975	Y48G1BM.9_254802_254975	-	-59.396	-0.343329	No
chrI	255079	255194	Y48G1BM.9_255079_255194	-	-52.209	-0.453991	No
chrI	255325	255369	Y48G1BM.9_255325_255369	-	-16.208	-0.368364	No
chrI	255446	255817	Y48G1BM.9_255446_255817	-	-113.365	-0.305566	YES
chrI	255960	256315	Y48G1BM.9_255960_256315	-	-98.948	-0.278727	No
chrI	256643	257417	Y48G1BM.9_256643_257417	-	-466.876	-0.603199	No
chrI	257661	258020	Y48G1BM.9_257661_258020	-	-149.663	-0.416889	No
chrI	258358	258547	Y48G1BR.1_258358_258547	-	-69.149	-0.365868	No
chrI	258683	259106	Y48G1BR.1_258683_259106	-	-156.455	-0.36987	No
chrI	280206	280310	C53D5.3_280206_280310	+	-34.577	-0.332471	No
chrI	283649	284308	C53D5.2_283649_284308	+	-261.069	-0.396159	YES
chrI	284538	285007	C53D5.2_284538_285007	+	-156.9	-0.334542	YES
chrI	285211	285557	C53D5.2_285211_285557	+	-137.24	-0.396647	YES
chrI	285638	285834	C53D5.2_285638_285834	+	-60.069	-0.306474	No
chrI	286420	286873	C53D5.4_286420_286873	-	-160.767	-0.354894	No
chrI	286997	287508	C53D5.4_286997_287508	-	-187.384	-0.366701	No
chrI	288003	288558	C53D5.4_288003_288558	-	-157.585	-0.283937	No
chrI	288645	288750	C53D5.4_288645_288750	-	-24.553	-0.233838	No
chrI	288903	288973	C53D5.4_288903_288973	-	-13.613	-0.194471	No
chrI	291308	295792	C53D5.1_291308_295792	+	-1596.34	-0.356008	YES
chrI	295851	302595	C53D5.1_295851_302595	+	-2306.83	-0.342057	YES
chrI	302705	302761	C53D5.1_302705_302761	+	-12.241	-0.218589	No
chrI	302831	303203	C53D5.1_302831_303203	+	-110.885	-0.298078	No
chrI	303729	303788	C53D5.1_303729_303788	+	-15.635	-0.265	No
chrI	303910	304093	C53D5.1_303910_304093	+	-47.967	-0.262115	No
chrI	304256	304928	C53D5.1_304256_304928	+	-204.558	-0.304402	No
chrI	306089	306290	C53D5.5_306089_306290	-	-59.916	-0.29809	No
chrI	306609	307091	C53D5.5_306609_307091	-	-164.432	-0.341145	No
chrI	307815	308571	C53D5.5_307815_308571	-	-276.458	-0.365685	No
chrI	308792	309205	C53D5.5_308792_309205	-	-145.162	-0.351482	YES
chrI	309435	309542	C53D5.5_309435_309542	-	-42.461	-0.396832	YES
chrI	309762	310762	C53D5.5_309762_310762	-	-408.855	-0.408855	YES
chrI	311577	311634	C53D5.6_311577_311634	-	-5.469	-0.0959474	YES
chrI	311785	311836	C53D5.6_311785_311836	-	-8.986	-0.176196	YES
chrI	312879	312926	C53D5.6_312879_312926	-	-10.522	-0.223872	No
chrI	313843	313888	C53D5.6_313843_313888	-	-9.892	-0.219822	No
chrI	314103	314154	C53D5.6_314103_314154	-	-7.064	-0.13851	No
chrI	314775	314823	C53D5.6_314775_314823	-	-5.574	-0.116125	YES
chrI	319129	319738	Y48G1A.5_319129_319738	-	-177.447	-0.291374	No
chrI	320418	321075	Y48G1A.5_320418_321075	-	-211.089	-0.321292	No
chrI	322389	322785	Y48G1A.5_322389_322785	-	-138.515	-0.349785	No
chrI	323094	323143	Y48G1A.5_323094_323143	-	-12.722	-0.259633	No
chrI	323935	323979	Y48G1A.4_323935_323979	+	-14.931	-0.339341	No
chrI	324241	324289	Y48G1A.4_324241_324289	+	-10.441	-0.217521	No
chrI	324654	325299	Y48G1A.4_324654_325299	+	-196.727	-0.305003	No
chrI	325414	325462	Y48G1A.4_325414_325462	+	-9.083	-0.189229	YES
chrI	326049	326959	Y48G1A.4_326049_326959	+	-218.424	-0.240026	No
chrI	327246	327847	Y48G1A.4_327246_327847	+	-146.154	-0.243185	No
chrI	327980	330111	Y48G1A.4_327980_330111	+	-678.777	-0.318525	YES
chrI	332765	332846	Y48G1A.3_332765_332846	+	-30.233	-0.373247	No
chrI	332950	333791	Y48G1A.3_332950_333791	+	-362.071	-0.430524	YES
chrI	334111	335709	Y48G1A.3_334111_335709	+	-476.613	-0.298256	No
chrI	336144	337565	Y48G1A.3_336144_337565	+	-739.222	-0.520213	YES
chrI	343652	343896	Y48G1A.6_343652_343896	-	-80.731	-0.330865	No
chrI	344036	345023	Y48G1A.6_344036_345023	-	-445.46	-0.451327	No
chrI	345833	346377	Y48G1A.6_345833_346377	-	-104.174	-0.191496	No
chrI	346519	346563	Y48G1A.6_346519_346563	-	-7.326	-0.1665	No
chrI	346745	346795	Y48G1A.6_346745_346795	-	-9.512	-0.19024	No
chrI	347047	347095	Y48G1A.6_347047_347095	-	-8.012	-0.166917	No
chrI	347584	347632	Y48G1A.2_347584_347632	+	-10.524	-0.21925	No
chrI	347709	347764	Y48G1A.2_347709_347764	+	-12.014	-0.218436	No
chrI	347986	348044	Y48G1A.2_347986_348044	+	-9.664	-0.166621	No
chrI	348622	348679	Y48G1A.1_348622_348679	+	-11.482	-0.201439	No
chrI	348907	349354	Y48G1A.1_348907_349354	+	-144.524	-0.32332	No
chrI	349683	350643	Y48G1A.1_349683_350643	+	-361.19	-0.37624	YES
chrI	350988	351796	Y48G1A.1_350988_351796	+	-271.704	-0.336267	No
chrI	352083	352868	Y48G1A.1_352083_352868	+	-330.706	-0.421282	No
chrI	353175	353746	Y48G1A.1_353175_353746	+	-192.405	-0.336961	No
chrI	353967	354383	Y48G1A.1_353967_354383	+	-110.31	-0.265168	No
chrI	354702	355376	Y48G1A.1_354702_355376	+	-318.439	-0.472461	No
chrI	355484	355540	Y48G1A.1_355484_355540	+	-10.865	-0.194018	No
chrI	355820	356836	Y48G1A.1_355820_356836	+	-408.029	-0.401603	No
chrI	356949	356996	Y48G1A.1_356949_356996	+	-12.363	-0.263043	No
chrI	357330	357378	R119.1_357330_357378	-	-4.232	-0.0881667	No
chrI	357485	358293	R119.1_357485_358293	-	-238.709	-0.295432	No
chrI	358761	360227	R119.1_358761_360227	-	-633.679	-0.43225	No
chrI	360697	361251	R119.1_360697_361251	-	-187.472	-0.338397	YES
chrI	361587	363072	R119.1_361587_363072	-	-671.718	-0.452335	No
chrI	363606	363657	R119.1_363606_363657	-	-6.119	-0.11998	No
chrI	363717	363774	R119.1_363717_363774	-	-8.783	-0.154088	No
chrI	364682	364738	R119.7_364682_364738	+	-2.895	-0.0516964	No
chrI	365194	365533	R119.7_365194_365533	+	-112.168	-0.330879	No
chrI	365599	365646	R119.7_365599_365646	+	-12.091	-0.257255	No
chrI	365963	366655	R119.7_365963_366655	+	-243.149	-0.351371	No
chrI	367212	367748	R119.7_367212_367748	+	-198.348	-0.370052	No
chrI	369249	370426	R119.2_369249_370426	-	-595.606	-0.506037	YES
chrI	370764	371357	R119.2_370764_371357	-	-186.249	-0.314079	No
chrI	371676	372620	R119.2_371676_372620	-	-320.176	-0.339169	No
chrI	372710	373333	R119.2_372710_373333	-	-220.962	-0.354674	No
chrI	373355	373574	R119.3_373355_373574	-	-70.243	-0.320744	YES
chrI	373745	377200	R119.3_373745_377200	-	-1015.17	-0.293826	YES
chrI	377521	378573	R119.3_377521_378573	-	-391.015	-0.371687	YES
chrI	378636	378705	R119.4_378636_378705	-	-22.892	-0.331768	YES
chrI	378879	378931	R119.3_378879_378931	-	-11.801	-0.226942	YES
chrI	380131	380185	R119.4_380131_380185	-	-11.396	-0.211037	YES
chrI	380558	380607	R119.4_380558_380607	-	-7.001	-0.142878	No
chrI	380924	380973	R119.4_380924_380973	-	-14.316	-0.292163	No
chrI	381221	381268	R119.4_381221_381268	-	-14.969	-0.318489	YES
chrI	381473	381793	R119.4_381473_381793	-	-120.946	-0.377956	YES
chrI	382916	382991	R119.6_382916_382991	+	-10.755	-0.1434	YES
chrI	383067	383123	R119.6_383067_383123	+	-8.519	-0.152125	No
chrI	383377	383431	R119.6_383377_383431	+	-14.783	-0.273759	YES
chrI	383567	384627	R119.6_383567_384627	+	-297.304	-0.280475	YES
chrI	385228	386078	R119.6_385228_386078	+	-293.63	-0.345447	YES
chrI	386339	388048	R119.6_386339_388048	+	-502.552	-0.294062	No
chrI	388153	388379	R119.6_388153_388379	+	-67.424	-0.298336	No
chrI	388941	389761	R119.5_388941_389761	-	-326.288	-0.397912	No
chrI	389823	390195	R119.5_389823_390195	-	-221.153	-0.594497	YES
chrI	390555	391037	R119.5_390555_391037	-	-179.405	-0.37221	No
chrI	391103	391614	R119.5_391103_391614	-	-181.567	-0.355317	No
chrI	391809	392160	R119.5_391809_392160	-	-110.754	-0.315538	YES
chrI	392195	392458	R119.5_392195_392458	-	-99.494	-0.378304	YES
chrI	392665	393000	R119.5_392665_393000	-	-144.783	-0.432188	YES
chrI	393125	393358	R119.5_393125_393358	-	-99.168	-0.425614	YES
chrI	393642	394092	R119.5_393642_394092	-	-178.426	-0.396502	YES
chrI	399051	399191	Y50C1A.1_399051_399191	+	-31.494	-0.224957	No
chrI	399272	399955	Y50C1A.1_399272_399955	+	-212.866	-0.311663	No
chrI	400108	401957	Y50C1A.1_400108_401957	+	-653.351	-0.353354	No
chrI	402050	402295	Y50C1A.1_402050_402295	+	-65.878	-0.26889	No
chrI	402420	403516	Y50C1A.1_402420_403516	+	-440.072	-0.401526	YES
chrI	403720	406065	Y50C1A.1_403720_406065	+	-1072.37	-0.457301	YES
chrI	406234	407372	Y50C1A.1_406234_407372	+	-644.511	-0.566354	YES
chrI	407547	408523	Y50C1A.1_407547_408523	+	-275.941	-0.282726	No
chrI	408766	410346	Y50C1A.1_408766_410346	+	-737.892	-0.46702	YES
chrI	410629	411205	Y50C1A.1_410629_411205	+	-171.184	-0.297194	YES
chrI	411438	412443	Y50C1A.1_411438_412443	+	-402.6	-0.400597	YES
chrI	413097	415874	Y50C1A.2_413097_415874	-	-1259.81	-0.453659	No
chrI	416099	416436	Y50C1A.2_416099_416436	-	-111.507	-0.330881	No
chrI	416654	417524	Y50C1A.2_416654_417524	-	-320.08	-0.367908	No
chrI	417653	417805	Y50C1A.2_417653_417805	-	-59.514	-0.391539	No
chrI	417934	417980	Y50C1A.2_417934_417980	-	-12.811	-0.2785	No
chrI	418100	418447	Y50C1A.2_418100_418447	-	-105.362	-0.303637	No
chrI	421035	421101	C07F11.2_421035_421101	+	-18.054	-0.273545	No
chrI	421224	421567	C07F11.2_421224_421567	+	-136.314	-0.397417	No
chrI	421804	421846	C07F11.2_421804_421846	+	-13.013	-0.309833	No
chrI	422185	422295	C07F11.2_422185_422295	+	-29.527	-0.268427	No
chrI	422496	422541	C07F11.2_422496_422541	+	-5.302	-0.117822	No
chrI	422691	422741	C07F11.2_422691_422741	+	-7.508	-0.15016	No
chrI	422896	423503	C07F11.2_422896_423503	+	-252.749	-0.41639	No
chrI	444112	444256	C07F11.1_444112_444256	+	-46.902	-0.325708	No
chrI	444379	444996	C07F11.1_444379_444996	+	-158.927	-0.25758	No
chrI	445087	446710	C07F11.1_445087_446710	+	-614.637	-0.378704	YES
chrI	446785	446916	C07F11.1_446785_446916	+	-37.812	-0.288641	No
chrI	447054	450199	C07F11.1_447054_450199	+	-1168.23	-0.371456	YES
chrI	450309	450484	C07F11.1_450309_450484	+	-51.462	-0.294069	YES
chrI	450762	451297	C07F11.1_450762_451297	+	-156.578	-0.292669	No
chrI	451464	455358	C07F11.1_451464_455358	+	-1675.04	-0.430159	YES
chrI	455494	455548	C07F11.1_455494_455548	+	-9.497	-0.17587	YES
chrI	455724	456858	C07F11.1_455724_456858	+	-298.999	-0.263668	No
chrI	456997	457238	C07F11.1_456997_457238	+	-65.389	-0.271324	No
chrI	458624	459571	C07F11.1_458624_459571	+	-400.101	-0.422493	YES
chrI	460065	460952	C07F11.1_460065_460952	+	-281.735	-0.317627	No
chrI	462176	462232	W04C9.4_462176_462232	+	-19.769	-0.353018	No
chrI	462321	462373	W04C9.4_462321_462373	+	-11.29	-0.217115	No
chrI	462874	463237	W04C9.5_462874_463237	-	-127.617	-0.351562	No
chrI	463424	464261	W04C9.5_463424_464261	-	-343.913	-0.410888	No
chrI	464527	465056	W04C9.5_464527_465056	-	-187.191	-0.353858	No
chrI	465217	465650	W04C9.5_465217_465650	-	-132.445	-0.305878	No
chrI	465698	465998	W04C9.5_465698_465998	-	-109.203	-0.36401	No
chrI	466127	467030	W04C9.5_466127_467030	-	-354.277	-0.392333	No
chrI	477735	478216	W04C9.3_477735_478216	+	-227.672	-0.473331	No
chrI	478326	478467	W04C9.3_478326_478467	+	-41.962	-0.297603	No
chrI	478746	478881	W04C9.3_478746_478881	+	-31.704	-0.234844	No
chrI	479112	479936	W04C9.3_479112_479936	+	-277.332	-0.336568	No
chrI	480184	480753	W04C9.3_480184_480753	+	-198.888	-0.34954	No
chrI	481132	481840	W04C9.3_481132_481840	+	-225.444	-0.318424	No
chrI	483031	484132	W04C9.6_483031_484132	-	-384.423	-0.349158	No
chrI	484312	484790	W04C9.6_484312_484790	-	-181.629	-0.379977	No
chrI	484861	484909	W04C9.6_484861_484909	-	-18.387	-0.383062	No
chrI	485005	485155	W04C9.6_485005_485155	-	-70.638	-0.47092	No
chrI	485279	485383	W04C9.6_485279_485383	-	-34.344	-0.330231	No
chrI	485622	486469	W04C9.6_485622_486469	-	-440.996	-0.520656	No
chrI	486852	487535	W04C9.6_486852_487535	-	-267.676	-0.391912	No
chrI	487730	487796	W04C9.6_487730_487796	-	-22.812	-0.345636	No
chrI	487905	487960	W04C9.6_487905_487960	-	-12.35	-0.224545	No
chrI	488726	488770	W04C9.2_488726_488770	+	-6.06	-0.137727	YES
chrI	488836	488884	W04C9.2_488836_488884	+	-10.109	-0.210604	No
chrI	488947	489702	W04C9.2_488947_489702	+	-233.463	-0.309223	No
chrI	490205	491199	W04C9.1_490205_491199	+	-448.704	-0.451412	YES
chrI	491305	491352	W04C9.1_491305_491352	+	-20.635	-0.439043	YES
chrI	491562	491612	W04C9.1_491562_491612	+	-10.578	-0.21156	No
chrI	491727	491838	W04C9.1_491727_491838	+	-31.381	-0.282712	No
chrI	492163	492227	W04C9.1_492163_492227	+	-16.364	-0.255688	YES
chrI	492354	492869	W04C9.1_492354_492869	+	-232.574	-0.4516	No
chrI	493559	494262	W04C9.1_493559_494262	+	-334.596	-0.475954	No
chrI	494346	494394	W04C9.1_494346_494394	+	-10.434	-0.217375	YES
chrI	494709	495830	W04C9.1_494709_495830	+	-439.442	-0.392009	YES
chrI	496286	496332	Y65B4BL.3_496286_496332	-	-14.39	-0.312826	No
chrI	496467	497692	Y65B4BL.3_496467_497692	-	-552.586	-0.451091	No
chrI	497833	498429	Y65B4BL.3_497833_498429	-	-275.065	-0.461518	No
chrI	498570	499795	Y65B4BL.3_498570_499795	-	-390.087	-0.318438	No
chrI	500122	501931	Y65B4BL.3_500122_501931	-	-958.039	-0.529596	YES
chrI	503215	504059	Y65B4BL.4_503215_504059	-	-237.493	-0.28139	No
chrI	504135	504227	Y65B4BL.4_504135_504227	-	-21.403	-0.232641	No
chrI	504281	504325	Y65B4BL.4_504281_504325	-	-12.095	-0.274886	No
chrI	504457	505508	Y65B4BL.4_504457_505508	-	-502.959	-0.478553	YES
chrI	505608	505662	Y65B4BL.4_505608_505662	-	-10.734	-0.198778	No
chrI	505774	505822	Y65B4BL.4_505774_505822	-	-9.03	-0.188125	No
chrI	506052	506095	Y65B4BL.4_506052_506095	-	-4.214	-0.098	No
chrI	506590	506641	Y65B4BL.2_506590_506641	+	-7.162	-0.140431	No
chrI	506748	506804	Y65B4BL.2_506748_506804	+	-11.053	-0.197375	No
chrI	507019	507067	Y65B4BL.2_507019_507067	+	-6.599	-0.137479	No
chrI	507228	507279	Y65B4BL.2_507228_507279	+	-10.43	-0.20451	No
chrI	507411	507456	Y65B4BL.2_507411_507456	+	-10.561	-0.234689	YES
chrI	507708	507757	Y65B4BL.2_507708_507757	+	-6.969	-0.142224	No
chrI	507898	507946	Y65B4BL.2_507898_507946	+	-9.451	-0.196896	No
chrI	508051	508100	Y65B4BL.2_508051_508100	+	-7.473	-0.15251	YES
chrI	508334	508384	Y65B4BL.2_508334_508384	+	-10.178	-0.20356	No
chrI	508494	508540	Y65B4BL.2_508494_508540	+	-11.984	-0.260522	No
chrI	508760	508807	Y65B4BL.2_508760_508807	+	-8.947	-0.190362	No
chrI	509217	509264	Y65B4BL.7_509217_509264	-	-7.56	-0.160851	No
chrI	509426	509750	Y65B4BL.7_509426_509750	-	-201.632	-0.622321	No
chrI	509891	510741	Y65B4BL.7_509891_510741	-	-385.937	-0.454044	No
chrI	511756	512483	Y65B4BL.5_511756_512483	-	-537.956	-0.739967	YES
chrI	513093	513145	Y65B4BL.5_513093_513145	-	-13.44	-0.258462	No
chrI	513728	513778	Y65B4BL.5_513728_513778	-	-14.765	-0.2953	YES
chrI	514211	515025	Y65B4BL.5_514211_515025	-	-559.324	-0.68713	YES
chrI	515239	516353	Y65B4BL.5_515239_516353	-	-791.814	-0.710785	YES
chrI	520411	521322	Y65B4BL.6_520411_521322	-	-350.244	-0.384461	YES
chrI	530722	530973	Y65B4BL.1_530722_530973	+	-40.008	-0.159394	YES
chrI	531094	531269	Y65B4BL.1_531094_531269	+	-66.634	-0.380766	YES
chrI	531351	531792	Y65B4BL.1_531351_531792	+	-171.756	-0.389469	YES
chrI	531880	531966	Y65B4BL.1_531880_531966	+	-21.031	-0.244547	YES
chrI	532556	532621	Y65B4BL.1_532556_532621	+	-15.038	-0.231354	No
chrI	534572	534620	Y65B4BR.8_534572_534620	+	-11.037	-0.229937	No
chrI	534727	534774	Y65B4BR.8_534727_534774	+	-12.151	-0.258532	No
chrI	534973	535033	Y65B4BR.8_534973_535033	+	-13.492	-0.224867	No
chrI	535852	535901	Y65B4BR.5_535852_535901	+	-8.087	-0.165041	YES
chrI	536309	536352	Y65B4BR.5_536309_536352	+	-8.548	-0.198791	YES
chrI	537246	537305	Y65B4BR.4_537246_537305	+	-5.988	-0.101492	YES
chrI	537563	537608	Y65B4BR.4_537563_537608	+	-12.139	-0.269756	No
chrI	537838	538704	Y65B4BR.4_537838_538704	+	-558.34	-0.644734	YES
chrI	538914	539455	Y65B4BR.4_538914_539455	+	-164.71	-0.304455	YES
chrI	539730	539797	Y65B4BR.4_539730_539797	+	-12.742	-0.190179	YES
chrI	540011	540066	Y65B4BR.4_540011_540066	+	-12.752	-0.231855	No
chrI	540387	540725	Y65B4BR.4_540387_540725	+	-103.785	-0.307056	YES
chrI	540986	541066	Y65B4BR.4_540986_541066	+	-18.9	-0.23625	YES
chrI	541288	541346	Y65B4BR.4_541288_541346	+	-10.744	-0.185241	YES
chrI	550915	551715	Y65B4BR.3_550915_551715	+	-342.819	-0.428524	YES
chrI	551912	552407	Y65B4BR.3_551912_552407	+	-173.692	-0.350893	No
chrI	552821	553137	Y65B4BR.3_552821_553137	+	-133.142	-0.421335	YES
chrI	553588	553822	Y65B4BR.3_553588_553822	+	-106.883	-0.456765	YES
chrI	554397	555026	Y65B4BR.3_554397_555026	+	-401.266	-0.637943	YES
chrI	555100	555147	Y65B4BR.3_555100_555147	+	-3.359	-0.0714681	No
chrI	555334	555384	Y65B4BR.3_555334_555384	+	-6.471	-0.12942	No
chrI	555768	555821	Y65B4BR.3_555768_555821	+	-1.979	-0.0373396	YES
chrI	557575	558406	Y65B4BR.2_557575_558406	+	-627.732	-0.755394	YES
chrI	558546	559509	Y65B4BR.2_558546_559509	+	-405.37	-0.420945	YES
chrI	559666	559708	Y65B4BR.2_559666_559708	+	-13.536	-0.322286	YES
chrI	559870	560704	Y65B4BR.2_559870_560704	+	-213.602	-0.256118	No
chrI	560801	561403	Y65B4BR.2_560801_561403	+	-247.367	-0.410909	No
chrI	562872	562922	Y65B4BR.1_562872_562922	+	-12.741	-0.25482	No
chrI	563122	563166	Y65B4BR.1_563122_563166	+	-11.116	-0.252636	No
chrI	563333	563376	Y65B4BR.1_563333_563376	+	-7.451	-0.173279	No
chrI	563460	563509	Y65B4BR.1_563460_563509	+	-6.466	-0.131959	No
chrI	563583	564611	Y65B4BR.1_563583_564611	+	-434.36	-0.422529	No
chrI	565547	565695	Y65B4BR.9_565547_565695	-	-61.018	-0.412284	No
chrI	565883	566243	Y65B4BR.9_565883_566243	-	-104.803	-0.291119	No
chrI	572607	572891	Y65B4BR.6_572607_572891	-	-76.097	-0.267947	YES
chrI	572996	573642	Y65B4BR.6_572996_573642	-	-217.262	-0.336319	YES
chrI	573896	574147	Y65B4BR.6_573896_574147	-	-54.904	-0.218741	YES
chrI	574665	574932	Y65B4BR.6_574665_574932	-	-50.885	-0.190581	YES
chrI	582628	582672	F56A6.5_582628_582672	-	-5.568	-0.126545	No
chrI	582887	583581	F56A6.5_582887_583581	-	-276	-0.397695	No
chrI	586136	587156	F56A6.2_586136_587156	-	-391.166	-0.383496	YES
chrI	587281	587335	F56A6.2_587281_587335	-	-11.427	-0.211611	No
chrI	587661	588631	F56A6.2_587661_588631	-	-336.672	-0.347085	No
chrI	588760	588816	F56A6.2_588760_588816	-	-11.329	-0.202304	No
chrI	588875	588930	F56A6.2_588875_588930	-	-14.225	-0.258636	No
chrI	589061	590160	F56A6.2_589061_590160	-	-403.788	-0.367414	No
chrI	590349	591268	F56A6.2_590349_591268	-	-377.626	-0.41091	YES
chrI	591307	591537	F56A6.2_591307_591537	-	-72.884	-0.316887	YES
chrI	591610	591744	F56A6.2_591610_591744	-	-40.038	-0.298791	No
chrI	591863	591939	F56A6.2_591863_591939	-	-24.266	-0.319289	No
chrI	592125	592443	F56A6.2_592125_592443	-	-129.173	-0.406204	YES
chrI	592519	592574	F56A6.2_592519_592574	-	-10.25	-0.186364	No
chrI	592695	593231	F56A6.2_592695_593231	-	-210.524	-0.392769	No
chrI	593496	593539	F56A6.2_593496_593539	-	-10.473	-0.243558	No
chrI	593738	595188	F56A6.2_593738_595188	-	-707.159	-0.487696	YES
chrI	595961	596336	F56A6.2_595961_596336	-	-119.143	-0.317715	No
chrI	596698	597641	F56A6.2_596698_597641	-	-619.242	-0.656672	No
chrI	597828	597887	F56A6.2_597828_597887	-	-4.792	-0.0812203	No
chrI	597974	598563	F56A6.2_597974_598563	-	-212.926	-0.361504	No
chrI	598662	601148	F56A6.2_598662_601148	-	-1544.36	-0.621223	No
chrI	601378	601421	F56A6.2_601378_601421	-	-12.59	-0.292791	No
chrI	601545	601606	F56A6.2_601545_601606	-	-15.616	-0.256	No
chrI	601774	603128	F56A6.2_601774_603128	-	-569.24	-0.420414	YES
chrI	603284	603377	F56A6.2_603284_603377	-	-25.863	-0.278097	No
chrI	603477	603526	F56A6.2_603477_603526	-	-12.913	-0.263531	No
chrI	603589	604332	F56A6.2_603589_604332	-	-341.37	-0.459448	YES
chrI	604596	604897	F56A6.2_604596_604897	-	-110.821	-0.368176	No
chrI	605142	606571	F56A6.2_605142_606571	-	-643.529	-0.450335	YES
chrI	606855	607363	F56A6.2_606855_607363	-	-174.763	-0.344022	No
chrI	615004	615823	F56A6.4_615004_615823	-	-431.175	-0.526465	YES
chrI	616117	623629	F56A6.4_616117_623629	-	-3418.4	-0.455059	YES
chrI	618360	618417	F56A6.1_618360_618417	+	-8.176	-0.143439	No
chrI	618671	618715	F56A6.1_618671_618715	+	-8.783	-0.199614	No
chrI	618915	618961	F56A6.1_618915_618961	+	-8.719	-0.189543	No
chrI	619021	619071	F56A6.1_619021_619071	+	-10.146	-0.20292	No
chrI	619190	619249	F56A6.1_619190_619249	+	-11.059	-0.187441	No
chrI	619692	619740	F56A6.1_619692_619740	+	-7.866	-0.163875	No
chrI	620027	620072	F56A6.1_620027_620072	+	-6.483	-0.144067	No
chrI	620469	620515	F56A6.1_620469_620515	+	-8.956	-0.194696	No
chrI	621171	621217	F56A6.1_621171_621217	+	-10.701	-0.23263	No
chrI	621795	621848	Y65B4A.4_621795_621848	+	-14.963	-0.282321	No
chrI	621973	622025	Y65B4A.4_621973_622025	+	-9.925	-0.190865	No
chrI	623719	624220	F56A6.4_623719_624220	-	-184.093	-0.367451	No
chrI	624378	625366	F56A6.4_624378_625366	-	-323.975	-0.32791	No
chrI	625475	625524	F56A6.4_625475_625524	-	-11.622	-0.237184	No
chrI	625707	627140	F56A6.4_625707_627140	-	-509.978	-0.355881	No
chrI	627366	629346	F56A6.4_627366_629346	-	-727.087	-0.367216	No
chrI	631288	633893	Y65B4A.6_631288_633893	-	-1310.31	-0.502998	YES
chrI	634800	636236	Y65B4A.6_634800_636236	-	-895.176	-0.623382	YES
chrI	637013	637067	Y65B4A.3_637013_637067	+	-13.928	-0.257926	YES
chrI	637177	637252	Y65B4A.3_637177_637252	+	-15.343	-0.204573	No
chrI	637340	637399	Y65B4A.3_637340_637399	+	-8.128	-0.137763	No
chrI	637709	637766	Y65B4A.3_637709_637766	+	-10.61	-0.18614	No
chrI	638251	645453	Y65B4A.2_638251_645453	+	-3197.54	-0.443979	YES
chrI	645570	647809	Y65B4A.2_645570_647809	+	-1143.57	-0.51075	YES
chrI	645739	645785	Y65B4A.7_645739_645785	-	-15.045	-0.327065	No
chrI	645987	647007	Y65B4A.7_645987_647007	-	-499.496	-0.489702	No
chrI	647073	647123	Y65B4A.7_647073_647123	-	-10.48	-0.2096	No
chrI	648077	648714	Y65B4A.2_648077_648714	+	-245.56	-0.385495	No
chrI	649007	649595	Y65B4A.2_649007_649595	+	-215.516	-0.366524	No
chrI	649751	652010	Y65B4A.2_649751_652010	+	-924.216	-0.409126	YES
chrI	652376	653680	Y65B4A.2_652376_653680	+	-612.701	-0.469863	YES
chrI	654230	654284	Y65B4A.1_654230_654284	+	-12.149	-0.224981	No
chrI	655062	656562	Y65B4A.1_655062_656562	+	-744.617	-0.496411	YES
chrI	656749	658383	Y65B4A.1_656749_658383	+	-490.186	-0.299991	No
chrI	659745	659935	Y65B4A.8_659745_659935	-	-140.776	-0.740926	YES
chrI	660279	661316	Y65B4A.8_660279_661316	-	-390.135	-0.376215	YES
chrI	661923	662934	Y65B4A.8_661923_662934	-	-461.438	-0.456417	No
chrI	663017	663068	Y65B4A.8_663017_663068	-	-18.731	-0.367275	No
chrI	663385	663445	Y65B4A.8_663385_663445	-	-19.857	-0.33095	No
chrI	663725	664452	Y65B4A.9_663725_664452	-	-221.732	-0.304996	No
chrI	664503	664550	Y65B4A.9_664503_664550	-	-9.624	-0.204766	No
chrI	665042	665090	Y65B4A.9_665042_665090	-	-3.546	-0.073875	No
chrI	665190	665893	Y65B4A.9_665190_665893	-	-252.519	-0.359202	No
chrI	666123	666168	Y65B4A.9_666123_666168	-	-3.913	-0.0869556	No
chrI	666285	666632	Y65B4A.9_666285_666632	-	-181.804	-0.523931	No
chrI	667879	669348	Y18H1A.14_667879_669348	-	-515.343	-0.350812	No
chrI	669572	671806	Y18H1A.14_669572_671806	-	-692.003	-0.30976	No
chrI	671996	672916	Y18H1A.14_671996_672916	-	-305.654	-0.332233	No
chrI	673261	674168	Y18H1A.14_673261_674168	-	-284.172	-0.31331	No
chrI	680559	681316	Y18H1A.11_680559_681316	+	-244.758	-0.323326	No
chrI	681433	681492	Y18H1A.11_681433_681492	+	-13.23	-0.224237	No
chrI	681644	682934	Y18H1A.11_681644_682934	+	-547.827	-0.424672	No
chrI	683156	683229	Y18H1A.11_683156_683229	+	-29.422	-0.403041	No
chrI	683472	683525	Y18H1A.11_683472_683525	+	-10.437	-0.196925	No
chrI	684067	684114	Y18H1A.10_684067_684114	-	-8.151	-0.173426	No
chrI	684232	685384	Y18H1A.10_684232_685384	-	-748.957	-0.650136	No
chrI	685487	685547	Y18H1A.10_685487_685547	-	-13.154	-0.219233	No
chrI	686412	686485	Y18H1A.10_686412_686485	-	-27.009	-0.369986	No
chrI	688302	688373	Y18H1A.1_688302_688373	+	-14.746	-0.20769	No
chrI	688601	689023	Y18H1A.1_688601_689023	+	-230.177	-0.545443	No
chrI	689324	690299	Y18H1A.1_689324_690299	+	-378.373	-0.388075	No
chrI	691063	691115	Y18H1A.1_691063_691115	+	-15.093	-0.29025	No
chrI	692373	692599	Y18H1A.4_692373_692599	-	-78.171	-0.345889	No
chrI	692687	693513	Y18H1A.4_692687_693513	-	-465.509	-0.56357	No
chrI	693850	694583	Y18H1A.4_693850_694583	-	-280.142	-0.382186	No
chrI	694653	694834	Y18H1A.4_694653_694834	-	-76.982	-0.425315	YES
chrI	695327	696680	Y18H1A.2_695327_696680	-	-752.511	-0.55618	YES
chrI	697011	698055	Y18H1A.2_697011_698055	-	-270.37	-0.258975	No
chrI	700789	701758	Y18H1A.3_700789_701758	-	-342.264	-0.353214	YES
chrI	701866	702251	Y18H1A.3_701866_702251	-	-303.916	-0.789392	YES
chrI	703988	704421	Y18H1A.3_703988_704421	-	-194.823	-0.449938	YES
chrI	704553	706421	Y18H1A.3_704553_706421	-	-1049.65	-0.561911	YES
chrI	706667	707948	Y18H1A.3_706667_707948	-	-620.598	-0.484464	YES
chrI	708273	710041	Y18H1A.3_708273_710041	-	-953.011	-0.539033	YES
chrI	710268	711877	Y18H1A.3_710268_711877	-	-835.221	-0.519093	YES
chrI	711998	713218	Y18H1A.3_711998_713218	-	-542.804	-0.444921	YES
chrI	713651	715476	Y18H1A.3_713651_715476	-	-1150.27	-0.630285	YES
chrI	715645	715727	Y18H1A.3_715645_715727	-	-17.128	-0.208878	YES
chrI	718241	718290	Y18H1A.7_718241_718290	-	-6.238	-0.127306	No
chrI	718367	718659	Y18H1A.7_718367_718659	-	-108.16	-0.370411	No
chrI	719440	719500	Y18H1A.7_719440_719500	-	-12.921	-0.21535	No
chrI	719604	719653	Y18H1A.7_719604_719653	-	-13.335	-0.272143	No
chrI	720256	720300	Y18H1A.6_720256_720300	+	-9.104	-0.206909	No
chrI	720435	720488	Y18H1A.6_720435_720488	+	-10.962	-0.20683	No
chrI	720602	720646	Y18H1A.6_720602_720646	+	-8.243	-0.187341	No
chrI	720787	720830	Y18H1A.6_720787_720830	+	-8.24	-0.191628	No
chrI	720942	722105	Y18H1A.6_720942_722105	+	-614.078	-0.528012	YES
chrI	722204	722246	Y18H1A.6_722204_722246	+	-11.586	-0.275857	No
chrI	722358	724572	Y18H1A.6_722358_724572	+	-633.612	-0.286184	No
chrI	724769	725111	Y18H1A.6_724769_725111	+	-157.371	-0.460149	YES
chrI	725228	725288	Y18H1A.6_725228_725288	+	-14.958	-0.2493	No
chrI	725395	726503	Y18H1A.6_725395_726503	+	-684.854	-0.618099	YES
chrI	726873	730283	Y18H1A.6_726873_730283	+	-1652.24	-0.484528	YES
chrI	730535	730838	Y18H1A.6_730535_730838	+	-142.129	-0.469073	No
chrI	732328	733135	Y18H1A.15_732328_733135	-	-192.38	-0.238389	No
chrI	733573	734487	Y18H1A.15_733573_734487	-	-187.703	-0.205364	No
chrI	734875	734967	Y18H1A.15_734875_734967	-	-32.921	-0.357837	No
chrI	735076	735126	Y18H1A.15_735076_735126	-	-20.877	-0.41754	No
chrI	735263	735767	Y18H1A.15_735263_735767	-	-180.779	-0.358688	No
chrI	736029	736268	Y18H1A.15_736029_736268	-	-45.578	-0.190703	No
chrI	742078	742811	Y18H1A.13_742078_742811	-	-354.65	-0.483834	No
chrI	743171	743215	Y18H1A.13_743171_743215	-	-11.629	-0.264295	No
chrI	743527	745295	Y18H1A.13_743527_745295	-	-814.24	-0.460543	No
chrI	745949	746748	Y18H1A.12_745949_746748	+	-444.176	-0.555915	YES
chrI	746912	746957	Y18H1A.12_746912_746957	+	-11.034	-0.2452	No
chrI	747343	748176	Y18H1A.12_747343_748176	+	-362.431	-0.435091	No
chrI	748595	749900	Y18H1A.9_748595_749900	-	-413.072	-0.31653	No
chrI	749998	750048	Y18H1A.9_749998_750048	-	-10.183	-0.20366	No
chrI	750170	750223	Y18H1A.9_750170_750223	-	-8.483	-0.160057	No
chrI	750308	750573	Y18H1A.9_750308_750573	-	-103.525	-0.39066	No
chrI	750848	752270	Y18H1A.9_750848_752270	-	-486.435	-0.342078	No
chrI	752556	753704	Y18H1A.9_752556_753704	-	-465.347	-0.405355	No
chrI	753845	754063	Y18H1A.9_753845_754063	-	-94.835	-0.435023	YES
chrI	754139	754455	Y18H1A.9_754139_754455	-	-154.847	-0.490022	No
chrI	754592	755000	Y18H1A.9_754592_755000	-	-136.84	-0.335392	No
chrI	755082	756872	Y18H1A.9_755082_756872	-	-649.739	-0.362983	YES
chrI	758895	758950	Y18H1A.8_758895_758950	+	-10.576	-0.192291	No
chrI	759056	759699	Y18H1A.8_759056_759699	+	-145.711	-0.226611	No
chrI	759800	760320	Y18H1A.8_759800_760320	+	-313.389	-0.602671	No
chrI	760990	761046	T06A4.2_760990_761046	-	-13.373	-0.238804	No
chrI	761370	761622	T06A4.2_761370_761622	-	-98.076	-0.38919	No
chrI	761720	761796	T06A4.2_761720_761796	-	-47.332	-0.622789	No
chrI	763827	765140	T06A4.3_763827_765140	+	-581.862	-0.443155	YES
chrI	765277	765434	T06A4.3_765277_765434	+	-38.283	-0.243841	YES
chrI	765648	766050	T06A4.3_765648_766050	+	-212.824	-0.529413	No
chrI	766152	766328	T06A4.3_766152_766328	+	-51.463	-0.292403	No
chrI	766448	766529	T06A4.3_766448_766529	+	-25.066	-0.309457	No
chrI	766644	767585	T06A4.3_766644_767585	+	-232.669	-0.247257	No
chrI	767737	768167	T06A4.3_767737_768167	+	-142.545	-0.3315	No
chrI	768227	768276	T06A4.3_768227_768276	+	-18.07	-0.368776	No
chrI	768451	768502	T06A4.3_768451_768502	+	-11.154	-0.218706	No
chrI	768631	768801	T06A4.3_768631_768801	+	-77.149	-0.453818	No
chrI	771061	771453	T06A4.1_771061_771453	+	-124.979	-0.318824	No
chrI	771569	771808	T06A4.1_771569_771808	+	-98.824	-0.41349	No
chrI	771914	771970	T06A4.1_771914_771970	+	-11.89	-0.212321	No
chrI	772157	773166	T06A4.1_772157_773166	+	-422.283	-0.418516	No
chrI	773388	773437	T06A4.1_773388_773437	+	-9.43	-0.192449	No
chrI	773549	773702	T06A4.1_773549_773702	+	-61.557	-0.402333	No
chrI	773990	774970	T06A4.1_773990_774970	+	-387.423	-0.39533	No
chrI	775067	775112	T06A4.1_775067_775112	+	-8.195	-0.182111	No
chrI	775390	775471	T06A4.1_775390_775471	+	-24.529	-0.302827	YES
chrI	775575	776166	T06A4.1_775575_776166	+	-326.972	-0.553252	No
chrI	803477	804347	ZC123.3_803477_804347	+	-359.005	-0.412649	No
chrI	804425	804472	ZC123.3_804425_804472	+	-9.031	-0.192149	No
chrI	804898	805602	ZC123.3_804898_805602	+	-287.896	-0.408943	No
chrI	819425	820266	ZC123.3_819425_820266	+	-283.864	-0.337532	No
chrI	820447	821463	ZC123.3_820447_821463	+	-332.079	-0.326849	No
chrI	821531	823095	ZC123.3_821531_823095	+	-573.104	-0.366435	YES
chrI	823273	824202	ZC123.3_823273_824202	+	-363.684	-0.391479	YES
chrI	824308	824612	ZC123.3_824308_824612	+	-104.537	-0.343872	YES
chrI	824765	827632	ZC123.3_824765_827632	+	-1210.1	-0.422079	YES
chrI	827845	828027	ZC123.3_827845_828027	+	-50.645	-0.278269	YES
chrI	828728	829814	ZC123.3_828728_829814	+	-384.866	-0.354389	No
chrI	829929	831111	ZC123.3_829929_831111	+	-527.14	-0.445973	YES
chrI	831725	831779	ZC123.3_831725_831779	+	-13.806	-0.255667	No
chrI	832823	832892	ZC123.3_832823_832892	+	-9.086	-0.131681	No
chrI	833136	833185	ZC123.3_833136_833185	+	-9.405	-0.191939	No
chrI	833275	834542	ZC123.3_833275_834542	+	-734.552	-0.579757	YES
chrI	838111	838157	ZC123.1_838111_838157	+	-5.895	-0.128152	No
chrI	838325	838545	ZC123.1_838325_838545	+	-88.148	-0.400673	No
chrI	839130	839679	ZC123.1_839130_839679	+	-212.429	-0.386938	YES
chrI	840095	840142	ZC123.1_840095_840142	+	-15.482	-0.329404	No
chrI	840763	841220	ZC123.1_840763_841220	+	-149.115	-0.326291	No
chrI	841583	841626	ZC123.1_841583_841626	+	-7.727	-0.179698	No
chrI	841979	842548	ZC123.4_841979_842548	-	-186.971	-0.328596	No
chrI	842677	842719	ZC123.4_842677_842719	-	-11.423	-0.271976	No
chrI	842864	842917	ZC123.4_842864_842917	-	-11.891	-0.224358	No
chrI	843100	843715	ZC123.4_843100_843715	-	-298.115	-0.48474	YES
chrI	844015	844063	ZC123.4_844015_844063	-	-8.469	-0.176437	No
chrI	844342	845616	ZC123.4_844342_845616	-	-576.281	-0.45234	YES
chrI	845764	845932	ZC123.4_845764_845932	-	-41.718	-0.248321	YES
chrI	846002	846085	ZC123.4_846002_846085	-	-14.684	-0.176916	No
chrI	846145	846598	ZC123.4_846145_846598	-	-151.243	-0.33387	No
chrI	853490	853563	Y95B8A.8_853490_853563	+	-17.213	-0.235795	No
chrI	853933	853988	Y95B8A.8_853933_853988	+	-14.382	-0.261491	No
chrI	873629	874651	Y95B8A.10_873629_874651	-	-378.587	-0.370437	YES
chrI	874745	875523	Y95B8A.10_874745_875523	-	-305.851	-0.393125	YES
chrI	876652	877708	Y95B8A.10_876652_877708	-	-414.186	-0.392222	YES
chrI	877917	878219	Y95B8A.10_877917_878219	-	-116.025	-0.384189	YES
chrI	878321	878408	Y95B8A.10_878321_878408	-	-4.545	-0.0522414	No
chrI	878460	879485	Y95B8A.10_878460_879485	-	-366.281	-0.357347	YES
chrI	879539	879594	Y95B8A.10_879539_879594	-	-16.992	-0.308945	No
chrI	879674	881111	Y95B8A.10_879674_881111	-	-640.865	-0.445974	YES
chrI	881204	882392	Y95B8A.10_881204_882392	-	-423.602	-0.356567	YES
chrI	883167	884906	Y95B8A.6_883167_884906	+	-668.731	-0.384549	YES
chrI	885043	886509	Y95B8A.6_885043_886509	+	-581.621	-0.39674	YES
chrI	886710	887882	Y95B8A.6_886710_887882	+	-311.778	-0.266022	No
chrI	888061	888152	Y95B8A.6_888061_888152	+	-40.907	-0.449527	No
chrI	888349	889676	Y95B8A.6_888349_889676	+	-717.553	-0.540733	No
chrI	890009	890112	Y95B8A.11_890009_890112	-	-52.048	-0.50532	No
chrI	890182	890439	Y95B8A.11_890182_890439	-	-85.348	-0.332093	No
chrI	890514	891324	Y95B8A.11_890514_891324	-	-315.769	-0.389838	No
chrI	891404	891606	Y95B8A.11_891404_891606	-	-80.752	-0.399762	No
chrI	891705	892183	Y95B8A.11_891705_892183	-	-180.628	-0.377883	No
chrI	892277	892429	Y95B8A.11_892277_892429	-	-46.677	-0.307086	No
chrI	892509	892566	Y95B8A.11_892509_892566	-	-11.829	-0.207526	No
chrI	892749	894504	Y95B8A.11_892749_894504	-	-680.987	-0.388027	No
chrI	894632	894684	Y95B8A.11_894632_894684	-	-13.173	-0.253327	No
chrI	894866	894926	Y95B8A.11_894866_894926	-	-7.742	-0.129033	No
chrI	897358	898181	Y95B8A.5_897358_898181	+	-221.835	-0.269544	No
chrI	898352	900615	Y95B8A.5_898352_900615	+	-574.792	-0.253996	No
chrI	900803	903105	Y95B8A.5_900803_903105	+	-1348.41	-0.585756	YES
chrI	903193	903255	Y95B8A.5_903193_903255	+	-12.396	-0.199935	No
chrI	903332	903384	Y95B8A.5_903332_903384	+	-9.15	-0.175962	YES
chrI	903514	904613	Y95B8A.5_903514_904613	+	-628.249	-0.571655	YES
chrI	904847	905736	Y95B8A.5_904847_905736	+	-754.871	-0.849124	YES
chrI	907562	909244	Y95B8A.4_907562_909244	+	-704.569	-0.418888	No
chrI	909423	909682	Y95B8A.4_909423_909682	+	-113.448	-0.438023	No
chrI	909843	909893	Y95B8A.4_909843_909893	+	-12.841	-0.25682	No
chrI	910136	910943	Y95B8A.4_910136_910943	+	-370.147	-0.45867	No
chrI	912576	912627	Y95B8A.12_912576_912627	-	-16.714	-0.327725	No
chrI	912829	914004	Y95B8A.12_912829_914004	-	-444.884	-0.378625	No
chrI	914113	914166	Y95B8A.12_914113_914166	-	-10.929	-0.206208	No
chrI	914352	914410	Y95B8A.12_914352_914410	-	-11.43	-0.197069	No
chrI	914821	915982	Y95B8A.12_914821_915982	-	-664.031	-0.571947	YES
chrI	916082	916173	Y95B8A.12_916082_916173	-	-17.371	-0.19089	No
chrI	916409	917213	Y95B8A.12_916409_917213	-	-283.661	-0.352812	No
chrI	917416	917916	Y95B8A.12_917416_917916	-	-175.103	-0.350206	No
chrI	917940	918781	Y95B8A.12_917940_918781	-	-334.277	-0.397476	No
chrI	918998	919095	Y95B8A.12_918998_919095	-	-15.569	-0.160505	No
chrI	938678	940223	Y95B8A.2_938678_940223	+	-593.856	-0.384373	YES
chrI	940310	940514	Y95B8A.2_940310_940514	+	-67.312	-0.329961	YES
chrI	940586	941234	Y95B8A.2_940586_941234	+	-252.466	-0.389608	YES
chrI	942478	943668	Y95B8A.1_942478_943668	+	-347.038	-0.291629	No
chrI	943976	944029	Y95B8A.1_943976_944029	+	-8.436	-0.15917	No
chrI	944185	944232	Y95B8A.1_944185_944232	+	-13.195	-0.280745	No
chrI	944345	945232	Y95B8A.1_944345_945232	+	-306.615	-0.345676	No
chrI	945466	945514	Y95B8A.1_945466_945514	+	-17.7	-0.36875	No
chrI	945581	945633	Y95B8A.1_945581_945633	+	-9.238	-0.177654	No
chrI	945837	945889	Y95B8A.1_945837_945889	+	-13.421	-0.258096	No
chrI	946016	946222	Y95B8A.1_946016_946222	+	-65.959	-0.320189	YES
chrI	946351	946400	Y95B8A.1_946351_946400	+	-12.598	-0.257102	No
chrI	946611	947159	Y95B8A.1_946611_947159	+	-305.318	-0.55715	YES
chrI	948794	949048	Y34D9B.1_948794_949048	-	-94.047	-0.370264	YES
chrI	949503	949776	Y34D9B.1_949503_949776	-	-103.301	-0.378392	YES
chrI	949953	950849	Y34D9B.1_949953_950849	-	-414.71	-0.462846	YES
chrI	950958	951021	Y34D9B.1_950958_951021	-	-16.658	-0.264413	YES
chrI	951113	951177	Y34D9B.1_951113_951177	-	-20.888	-0.326375	No
chrI	951318	952679	Y34D9B.1_951318_952679	-	-556.485	-0.40888	YES
chrI	952892	952953	Y34D9B.1_952892_952953	-	-10.654	-0.174656	YES
chrI	953095	957194	Y34D9B.1_953095_957194	-	-1565.98	-0.38204	YES
chrI	964055	964116	F54A5.2_964055_964116	-	-5.24	-0.0859016	No
chrI	964199	966478	F54A5.2_964199_966478	-	-1055.55	-0.463164	YES
chrI	966601	966649	F54A5.2_966601_966649	-	-5.771	-0.120229	No
chrI	966736	966781	F54A5.2_966736_966781	-	-10.645	-0.236556	No
chrI	966926	968237	F54A5.2_966926_968237	-	-622.188	-0.47459	No
chrI	968320	968365	F54A5.2_968320_968365	-	-14.221	-0.316022	No
chrI	968491	969239	F54A5.2_968491_969239	-	-351.342	-0.469709	YES
chrI	969841	969895	F54A5.3_969841_969895	-	-0.286	-0.0052963	No
chrI	969986	971462	F54A5.3_969986_971462	-	-473.14	-0.320556	No
chrI	971953	972650	F54A5.3_971953_972650	-	-217.828	-0.312522	No
chrI	972723	972869	F54A5.3_972723_972869	-	-29.393	-0.201322	YES
chrI	972940	972989	F54A5.3_972940_972989	-	-11.45	-0.233673	No
chrI	990145	990523	F54A5.1_990145_990523	+	-128.46	-0.339841	YES
chrI	991041	991498	F54A5.1_991041_991498	+	-192.306	-0.420801	YES
chrI	996097	996806	C54G6.3_996097_996806	+	-301.738	-0.425583	No
chrI	996909	996970	C54G6.3_996909_996970	+	-14.694	-0.240885	No
chrI	1004092	1004703	C54G6.2_1004092_1004703	+	-139.08	-0.227627	No
chrI	1005063	1006029	C54G6.2_1005063_1006029	+	-327.815	-0.339353	YES
chrI	1006325	1006461	C54G6.2_1006325_1006461	+	-49.73	-0.365662	No
chrI	1006549	1007013	C54G6.2_1006549_1007013	+	-168.711	-0.363601	No
chrI	1007137	1007188	C54G6.2_1007137_1007188	+	-15.004	-0.294196	No
chrI	1007274	1008082	C54G6.2_1007274_1008082	+	-333.477	-0.412719	No
chrI	1008465	1009524	C54G6.2_1008465_1009524	+	-316.522	-0.298888	No
chrI	1009756	1009820	C54G6.2_1009756_1009820	+	-24.093	-0.376453	No
chrI	1009892	1010207	C54G6.2_1009892_1010207	+	-133.956	-0.425257	No
chrI	1010294	1010594	C54G6.2_1010294_1010594	+	-99.451	-0.331503	No
chrI	1011657	1011699	C54G6.1_1011657_1011699	-	-12.228	-0.291143	No
chrI	1011855	1013669	C54G6.1_1011855_1013669	-	-861.337	-0.474827	No
chrI	1014028	1014083	C54G6.1_1014028_1014083	-	-17.098	-0.310873	No
chrI	1014209	1014265	C54G6.1_1014209_1014265	-	-12.112	-0.216286	No
chrI	1016527	1016934	C54G6.5_1016527_1016934	+	-185.678	-0.456211	YES
chrI	1020037	1023905	Y34D9A.1_1020037_1023905	-	-2055.81	-0.531492	YES
chrI	1024218	1026169	Y34D9A.1_1024218_1026169	-	-1453.59	-0.745049	YES
chrI	1026620	1029495	Y34D9A.1_1026620_1029495	-	-704.42	-0.245016	YES
chrI	1029606	1029664	Y34D9A.1_1029606_1029664	-	-18.967	-0.327017	YES
chrI	1031086	1031997	Y34D9A.4_1031086_1031997	-	-641.406	-0.704068	YES
chrI	1032876	1032930	Y34D9A.4_1032876_1032930	-	-8.015	-0.148426	No
chrI	1033215	1033267	Y34D9A.4_1033215_1033267	-	-6.573	-0.126404	No
chrI	1034500	1034549	Y34D9A.3_1034500_1034549	+	-10.459	-0.213449	No
chrI	1034647	1034693	Y34D9A.3_1034647_1034693	+	-9.481	-0.206109	No
chrI	1034882	1034934	Y34D9A.3_1034882_1034934	+	-12.372	-0.237923	No
chrI	1035066	1035123	Y34D9A.3_1035066_1035123	+	-16.625	-0.291667	No
chrI	1035247	1035306	Y34D9A.3_1035247_1035306	+	-10.627	-0.180119	No
chrI	1035399	1037314	Y34D9A.3_1035399_1037314	+	-883.232	-0.461218	YES
chrI	1037454	1037508	Y34D9A.3_1037454_1037508	+	-13.629	-0.252389	No
chrI	1037716	1039055	Y34D9A.3_1037716_1039055	+	-467.248	-0.348953	YES
chrI	1039297	1039340	Y34D9A.3_1039297_1039340	+	-5.489	-0.127651	No
chrI	1039884	1040116	Y34D9A.3_1039884_1040116	+	-72.504	-0.312517	No
chrI	1040649	1040700	Y34D9A.3_1040649_1040700	+	-12.615	-0.247353	No
chrI	1041693	1043358	Y34D9A.7_1041693_1043358	+	-930.797	-0.559037	YES
chrI	1043928	1046344	Y34D9A.7_1043928_1046344	+	-1295.02	-0.536018	No
chrI	1046581	1047958	Y34D9A.7_1046581_1047958	+	-381.252	-0.276871	No
chrI	1046829	1050672	Y34D9A.8_1046829_1050672	-	-1405.99	-0.365857	YES
chrI	1049689	1050407	Y34D9A.6_1049689_1050407	+	-261.836	-0.364674	YES
chrI	1051132	1051918	Y34D9A.8_1051132_1051918	-	-327.754	-0.41699	YES
chrI	1052028	1052094	Y34D9A.8_1052028_1052094	-	-19.775	-0.299621	YES
chrI	1052680	1052796	Y34D9A.8_1052680_1052796	-	-60.711	-0.523371	YES
chrI	1052857	1053597	Y34D9A.8_1052857_1053597	-	-273.866	-0.370089	YES
chrI	1054472	1056063	Y34D9A.10_1054472_1056063	-	-621.063	-0.39036	YES
chrI	1056208	1057696	Y34D9A.10_1056208_1057696	-	-622.262	-0.418187	YES
chrI	1057915	1059382	Y34D9A.10_1057915_1059382	-	-777.791	-0.530192	YES
chrI	1059546	1060452	Y34D9A.10_1059546_1060452	-	-538.446	-0.594311	YES
chrI	1060673	1066195	Y34D9A.10_1060673_1066195	-	-2626.86	-0.475708	YES
chrI	1062758	1063602	Y34D9A.2_1062758_1063602	+	-370.693	-0.43921	No
chrI	1064009	1064656	Y34D9A.2_1064009_1064656	+	-445.825	-0.689065	YES
chrI	1066328	1066394	Y34D9A.10_1066328_1066394	-	-11.047	-0.167379	No
chrI	1066564	1066659	Y34D9A.10_1066564_1066659	-	-26.786	-0.281958	No
chrI	1066771	1066851	Y34D9A.10_1066771_1066851	-	-24.078	-0.300975	YES
chrI	1068894	1068976	R06A10.2_1068894_1068976	+	-17.689	-0.21572	YES
chrI	1069091	1069416	R06A10.2_1069091_1069416	+	-161.653	-0.497394	YES
chrI	1069578	1070370	R06A10.2_1069578_1070370	+	-344.884	-0.43546	YES
chrI	1070490	1071472	R06A10.2_1070490_1071472	+	-353.035	-0.359506	YES
chrI	1071570	1071623	R06A10.2_1071570_1071623	+	-2.992	-0.0564528	No
chrI	1071752	1071801	R06A10.2_1071752_1071801	+	-11.749	-0.239776	YES
chrI	1071936	1072675	R06A10.2_1071936_1072675	+	-315.459	-0.426873	YES
chrI	1072919	1074199	R06A10.2_1072919_1074199	+	-447.412	-0.349541	YES
chrI	1078712	1078782	R06A10.3_1078712_1078782	-	-9.888	-0.141257	No
chrI	1078833	1078924	R06A10.3_1078833_1078924	-	-39.055	-0.429176	No
chrI	1078961	1079134	R06A10.3_1078961_1079134	-	-55.904	-0.323145	No
chrI	1084674	1085991	R06A10.1_1084674_1085991	+	-435.53	-0.330699	No
chrI	1086207	1087252	R06A10.1_1086207_1087252	+	-387.628	-0.370936	No
chrI	1087388	1087452	R06A10.1_1087388_1087452	+	-23.015	-0.359609	No
chrI	1087528	1088387	R06A10.1_1087528_1088387	+	-381.828	-0.444503	No
chrI	1088602	1088918	R06A10.1_1088602_1088918	+	-107.72	-0.340886	No
chrI	1089043	1089092	R06A10.1_1089043_1089092	+	-16.696	-0.340735	No
chrI	1089199	1089586	R06A10.1_1089199_1089586	+	-149.039	-0.385114	No
chrI	1090205	1090445	R06A10.4_1090205_1090445	-	-115.971	-0.483212	YES
chrI	1090625	1091331	R06A10.4_1090625_1091331	-	-348.037	-0.49297	YES
chrI	1091457	1091509	R06A10.4_1091457_1091509	-	-13.788	-0.265154	No
chrI	1091685	1092672	R06A10.4_1091685_1092672	-	-307.839	-0.311894	YES
chrI	1092844	1094309	R06A10.4_1092844_1094309	-	-707.12	-0.482676	YES
chrI	1094570	1095670	R06A10.4_1094570_1095670	-	-342.674	-0.311522	No
chrI	1107633	1107686	ZK993.2_1107633_1107686	+	-10.361	-0.195491	No
chrI	1107880	1108786	ZK993.2_1107880_1108786	+	-315.18	-0.347881	No
chrI	1109164	1109687	ZK993.2_1109164_1109687	+	-167.87	-0.320975	No
chrI	1110158	1111879	ZK993.2_1110158_1111879	+	-654.736	-0.380439	No
chrI	1112191	1112899	ZK993.2_1112191_1112899	+	-203.03	-0.286766	No
chrI	1113133	1113525	ZK993.2_1113133_1113525	+	-106.34	-0.271276	No
chrI	1113942	1114847	ZK993.2_1113942_1114847	+	-335.618	-0.370849	No
chrI	1128429	1129212	ZK993.1_1128429_1129212	+	-263.936	-0.337083	No
chrI	1129397	1129808	ZK993.1_1129397_1129808	+	-155.237	-0.377706	YES
chrI	1130017	1131224	ZK993.1_1130017_1131224	+	-525.283	-0.435197	YES
chrI	1131290	1131475	ZK993.1_1131290_1131475	+	-50.245	-0.271595	No
chrI	1136745	1137814	Y48G8AL.9_1136745_1137814	-	-322.796	-0.301961	No
chrI	1138144	1140160	Y48G8AL.9_1138144_1140160	-	-1270.3	-0.630109	YES
chrI	1140271	1140805	Y48G8AL.9_1140271_1140805	-	-229.487	-0.429751	YES
chrI	1142301	1143351	Y48G8AL.10_1142301_1143351	-	-348.543	-0.331946	YES
chrI	1143542	1145717	Y48G8AL.10_1143542_1145717	-	-1676.02	-0.770584	YES
chrI	1145858	1147089	Y48G8AL.10_1145858_1147089	-	-691.291	-0.561569	YES
chrI	1147588	1149908	Y48G8AL.10_1147588_1149908	-	-1588.87	-0.684858	YES
chrI	1150635	1152125	Y48G8AL.10_1150635_1152125	-	-942.548	-0.632583	YES
chrI	1152283	1152636	Y48G8AL.10_1152283_1152636	-	-101.919	-0.288722	No
chrI	1152815	1152880	Y48G8AL.10_1152815_1152880	-	-12.161	-0.187092	No
chrI	1153011	1153750	Y48G8AL.10_1153011_1153750	-	-241.701	-0.327065	YES
chrI	1155710	1155750	Y48G8AL.14_1155710_1155750	-	-3.925	-0.098125	YES
chrI	1156792	1156876	Y48G8AL.8_1156792_1156876	+	-31.674	-0.377071	YES
chrI	1156892	1156973	Y48G8AL.8_1156892_1156973	+	-22.976	-0.283654	YES
chrI	1157098	1157276	Y48G8AL.8_1157098_1157276	+	-55.779	-0.313365	No
chrI	1158035	1162619	Y48G8AL.7_1158035_1162619	+	-2425.61	-0.529147	YES
chrI	1163045	1164511	Y48G8AL.11_1163045_1164511	-	-949.163	-0.647451	YES
chrI	1164729	1166228	Y48G8AL.11_1164729_1166228	-	-698.351	-0.465878	YES
chrI	1166328	1166380	Y48G8AL.11_1166328_1166380	-	-24.137	-0.464173	No
chrI	1166586	1167654	Y48G8AL.11_1166586_1167654	-	-332.807	-0.311617	YES
chrI	1167979	1169559	Y48G8AL.11_1167979_1169559	-	-768.625	-0.486472	YES
chrI	1169803	1170672	Y48G8AL.11_1169803_1170672	-	-327.045	-0.376346	YES
chrI	1170899	1173810	Y48G8AL.11_1170899_1173810	-	-2039.62	-0.70066	YES
chrI	1174098	1175386	Y48G8AL.11_1174098_1175386	-	-705.911	-0.548068	YES
chrI	1175630	1175691	Y48G8AL.11_1175630_1175691	-	-11.636	-0.190754	YES
chrI	1176624	1177880	Y48G8AL.6_1176624_1177880	+	-597.036	-0.475347	YES
chrI	1178422	1179005	Y48G8AL.6_1178422_1179005	+	-177.774	-0.30493	No
chrI	1179394	1180249	Y48G8AL.6_1179394_1180249	+	-536.905	-0.627959	YES
chrI	1181190	1182421	Y48G8AL.6_1181190_1182421	+	-650.289	-0.528261	YES
chrI	1182506	1182874	Y48G8AL.6_1182506_1182874	+	-92.396	-0.251076	YES
chrI	1183182	1184853	Y48G8AL.6_1183182_1184853	+	-692.146	-0.414211	YES
chrI	1185138	1187292	Y48G8AL.6_1185138_1187292	+	-888.616	-0.412542	YES
chrI	1187506	1189070	Y48G8AL.6_1187506_1189070	+	-1136.16	-0.726445	YES
chrI	1189641	1190020	Y48G8AL.6_1189641_1190020	+	-91.476	-0.241361	YES
chrI	1193445	1195745	Y48G8AL.5_1193445_1195745	+	-869.449	-0.378021	YES
chrI	1196095	1198546	Y48G8AL.5_1196095_1198546	+	-923.396	-0.376743	YES
chrI	1199144	1201880	Y48G8AL.5_1199144_1201880	+	-1126.19	-0.411619	YES
chrI	1202063	1207324	Y48G8AL.5_1202063_1207324	+	-2935.91	-0.558052	YES
chrI	1211591	1212576	Y48G8AL.1_1211591_1212576	+	-371.336	-0.376991	YES
chrI	1212776	1213789	Y48G8AL.1_1212776_1213789	+	-249.523	-0.246321	YES
chrI	1213982	1221049	Y48G8AL.1_1213982_1221049	+	-3622.29	-0.512564	YES
chrI	1215126	1217174	Y48G8AL.16_1215126_1217174	-	-1208.64	-0.590156	YES
chrI	1218659	1218887	Y48G8AL.12_1218659_1218887	-	-92.828	-0.40714	No
chrI	1221247	1222679	Y48G8AL.1_1221247_1222679	+	-864.309	-0.603568	YES
chrI	1224337	1224657	Y48G8AL.13_1224337_1224657	-	-140.734	-0.439794	YES
chrI	1224781	1225178	Y48G8AL.13_1224781_1225178	-	-166.958	-0.420549	YES
chrI	1225538	1226621	Y48G8AL.13_1225538_1226621	-	-538.366	-0.497106	YES
chrI	1226814	1227746	Y48G8AL.13_1226814_1227746	-	-395.077	-0.423902	YES
chrI	1232636	1233778	Y48G8AL.1_1232636_1233778	+	-461.801	-0.404379	YES
chrI	1233885	1234494	Y48G8AL.1_1233885_1234494	+	-349.505	-0.5739	YES
chrI	1234675	1236164	Y48G8AL.1_1234675_1236164	+	-726.655	-0.488015	YES
chrI	1236360	1237955	Y48G8AL.1_1236360_1237955	+	-1304.51	-0.817875	YES
chrI	1238107	1239440	Y48G8AL.1_1238107_1239440	+	-347.118	-0.260404	No
chrI	1239641	1241101	Y48G8AL.1_1239641_1241101	+	-515.784	-0.353277	No
chrI	1241257	1242770	Y48G8AL.1_1241257_1242770	+	-624.105	-0.412495	No
chrI	1242859	1245228	Y48G8AL.1_1242859_1245228	+	-1502.84	-0.634377	YES
chrI	1245394	1247364	Y48G8AL.1_1245394_1247364	+	-1172.3	-0.595076	YES
chrI	1247592	1247780	Y48G8AL.1_1247592_1247780	+	-45.082	-0.239798	No
chrI	1247960	1253334	Y48G8AL.1_1247960_1253334	+	-2622.74	-0.488042	YES
chrI	1253517	1254378	Y48G8AL.1_1253517_1254378	+	-587.144	-0.681933	YES
chrI	1254862	1257779	Y48G8AL.15_1254862_1257779	+	-1275.83	-0.437377	YES
chrI	1259673	1262353	Y48G8AR.1_1259673_1262353	-	-1251.31	-0.466907	YES
chrI	1262472	1262928	Y48G8AR.1_1262472_1262928	-	-151.293	-0.331783	No
chrI	1263156	1264181	Y48G8AR.1_1263156_1264181	-	-369.753	-0.360735	YES
chrI	1264239	1264758	Y48G8AR.1_1264239_1264758	-	-207.001	-0.398846	YES
chrI	1264914	1265423	Y48G8AR.1_1264914_1265423	-	-230.373	-0.452599	YES
chrI	1265633	1266271	Y48G8AR.1_1265633_1266271	-	-275.271	-0.431459	YES
chrI	1266434	1267581	Y48G8AR.1_1266434_1267581	-	-391.445	-0.341277	YES
chrI	1282233	1282699	Y48G8AR.2_1282233_1282699	+	-208.284	-0.446961	No
chrI	1282822	1283726	Y48G8AR.2_1282822_1283726	+	-301.209	-0.333196	No
chrI	1283832	1283902	Y48G8AR.2_1283832_1283902	+	-15.641	-0.223443	No
chrI	1283994	1284145	Y48G8AR.2_1283994_1284145	+	-34.545	-0.228775	No
chrI	1284285	1284579	Y48G8AR.2_1284285_1284579	+	-97.436	-0.331415	No
chrI	1284759	1284805	Y48G8AR.2_1284759_1284805	+	-10.929	-0.237587	No
chrI	1284866	1284908	Y48G8AR.2_1284866_1284908	+	-6.582	-0.156714	No
chrI	1284978	1285165	Y48G8AR.2_1284978_1285165	+	-80.38	-0.42984	No
chrI	1287588	1287780	Y48G8AR.3_1287588_1287780	+	-51.077	-0.266026	No
chrI	1305683	1306930	K12C11.4_1305683_1306930	+	-499.998	-0.400961	YES
chrI	1307155	1307861	K12C11.4_1307155_1307861	+	-236.404	-0.33485	YES
chrI	1308200	1309107	K12C11.4_1308200_1309107	+	-270.114	-0.29781	No
chrI	1309604	1310990	K12C11.4_1309604_1310990	+	-528.166	-0.381072	YES
chrI	1311292	1312840	K12C11.4_1311292_1312840	+	-620.056	-0.400553	YES
chrI	1312939	1320041	K12C11.4_1312939_1320041	+	-2479.17	-0.349081	YES
chrI	1320239	1320349	K12C11.4_1320239_1320349	+	-19.082	-0.173473	No
chrI	1320625	1321783	K12C11.4_1320625_1321783	+	-554.326	-0.478693	YES
chrI	1322333	1323280	K12C11.4_1322333_1323280	+	-387.224	-0.408895	YES
chrI	1323732	1324580	K12C11.4_1323732_1324580	+	-385.565	-0.454676	YES
chrI	1325012	1326074	K12C11.4_1325012_1326074	+	-355.505	-0.33475	YES
chrI	1326611	1327889	K12C11.4_1326611_1327889	+	-501.266	-0.392227	No
chrI	1332773	1333004	K12C11.5_1332773_1333004	+	-114.09	-0.493896	No
chrI	1333147	1333269	K12C11.5_1333147_1333269	+	-49.709	-0.407451	No
chrI	1333359	1333778	K12C11.5_1333359_1333778	+	-192.279	-0.4589	No
chrI	1333953	1334008	K12C11.5_1333953_1334008	+	-12.171	-0.221291	No
chrI	1335517	1335997	K12C11.3_1335517_1335997	+	-172.297	-0.358952	No
chrI	1336118	1336210	K12C11.3_1336118_1336210	+	-33.984	-0.369391	YES
chrI	1336301	1336689	K12C11.3_1336301_1336689	+	-136.288	-0.351258	No
chrI	1337118	1337256	K12C11.6_1337118_1337256	+	-33.667	-0.243964	No
chrI	1337374	1337938	K12C11.6_1337374_1337938	+	-207.543	-0.367984	YES
chrI	1338997	1339277	K12C11.7_1338997_1339277	+	-110.569	-0.394889	No
chrI	1339372	1339431	K12C11.7_1339372_1339431	+	-10.344	-0.175322	No
chrI	1339568	1339632	K12C11.7_1339568_1339632	+	-17.922	-0.280031	No
chrI	1340770	1340826	K12C11.2_1340770_1340826	+	-15.02	-0.268214	YES
chrI	1340770	1340826	K12C11.1_1340770_1340826	-	-14.277	-0.254946	No
chrI	1340927	1340977	K12C11.1_1340927_1340977	-	-11.09	-0.2218	YES
chrI	1340927	1340977	K12C11.2_1340927_1340977	+	-9.278	-0.18556	No
chrI	1341638	1342173	K12C11.1_1341638_1342173	-	-199.433	-0.372772	YES
chrI	1342728	1344034	K12C11.1_1342728_1344034	-	-425.511	-0.325812	No
chrI	1348742	1350807	Y92H12BL.1_1348742_1350807	+	-1387.74	-0.672029	YES
chrI	1351176	1354196	Y92H12BL.1_1351176_1354196	+	-1374.57	-0.455156	YES
chrI	1354342	1356083	Y92H12BL.1_1354342_1356083	+	-1024.16	-0.58826	YES
chrI	1356373	1358068	Y92H12BL.1_1356373_1358068	+	-1105.44	-0.652177	YES
chrI	1358519	1359414	Y92H12BL.1_1358519_1359414	+	-663.634	-0.741491	YES
chrI	1365622	1371175	Y92H12BL.5_1365622_1371175	+	-3203.19	-0.57684	YES
chrI	1371351	1375515	Y92H12BL.5_1371351_1375515	+	-1776.85	-0.426717	YES
chrI	1375740	1375879	Y92H12BL.5_1375740_1375879	+	-37.114	-0.267007	YES
chrI	1377361	1379233	Y92H12BL.4_1377361_1379233	-	-1002.57	-0.535561	YES
chrI	1378938	1379019	Y92H12BL.2_1378938_1379019	+	-21.771	-0.268778	No
chrI	1379605	1382274	Y92H12BL.4_1379605_1382274	-	-1333.15	-0.499494	YES
chrI	1382307	1382466	Y92H12BL.4_1382307_1382466	-	-47.978	-0.301748	No
chrI	1382564	1383514	Y92H12BL.4_1382564_1383514	-	-604.28	-0.636084	YES
chrI	1383719	1384991	Y92H12BL.4_1383719_1384991	-	-549.386	-0.431907	YES
chrI	1386405	1389270	Y92H12BM.1_1386405_1389270	-	-1628.46	-0.568398	YES
chrI	1389447	1391114	Y92H12BM.1_1389447_1391114	-	-964.34	-0.578488	YES
chrI	1391298	1392582	Y92H12BM.1_1391298_1392582	-	-331.468	-0.258153	No
chrI	1394782	1395760	Y92H12BR.7_1394782_1395760	+	-461.478	-0.471859	No
chrI	1395876	1395940	Y92H12BR.7_1395876_1395940	+	-6.751	-0.105484	No
chrI	1396114	1397517	Y92H12BR.7_1396114_1397517	+	-432.711	-0.308418	No
chrI	1397709	1399169	Y92H12BR.7_1397709_1399169	+	-451.465	-0.309223	No
chrI	1399349	1402093	Y92H12BR.7_1399349_1402093	+	-1787.59	-0.651454	YES
chrI	1406374	1408458	Y92H12BR.6_1406374_1408458	+	-989.721	-0.474914	YES
chrI	1408638	1411442	Y92H12BR.6_1408638_1411442	+	-1033.47	-0.36857	No
chrI	1411617	1412612	Y92H12BR.6_1411617_1412612	+	-162.251	-0.163066	No
chrI	1414241	1415239	Y92H12BR.2_1414241_1415239	-	-304.711	-0.305322	YES
chrI	1415351	1415401	Y92H12BR.2_1415351_1415401	-	-6.118	-0.12236	YES
chrI	1415489	1415554	Y92H12BR.2_1415489_1415554	-	-12.409	-0.190908	YES
chrI	1415648	1415727	Y92H12BR.2_1415648_1415727	-	-20.498	-0.259468	YES
chrI	1416739	1416796	Y92H12BR.3_1416739_1416796	+	-14.751	-0.258789	YES
chrI	1416962	1420212	Y92H12BR.3_1416962_1420212	+	-1961.48	-0.603532	YES
chrI	1421310	1422689	Y92H12BR.3_1421310_1422689	+	-666.778	-0.483523	YES
chrI	1422994	1424412	Y92H12BR.3_1422994_1424412	+	-973.708	-0.686677	YES
chrI	1433154	1433649	Y92H12BR.4_1433154_1433649	-	-148.655	-0.300313	No
chrI	1436431	1437380	Y92H12BR.8_1436431_1437380	+	-253.407	-0.267025	YES
chrI	1437505	1440582	Y92H12BR.8_1437505_1440582	+	-2299.5	-0.747319	YES
chrI	1441725	1442530	F37F2.2_1441725_1442530	-	-248.532	-0.308735	YES
chrI	1442657	1443597	F37F2.2_1442657_1443597	-	-317.488	-0.337753	YES
chrI	1443778	1443827	F37F2.2_1443778_1443827	-	-13.986	-0.285429	YES
chrI	1446949	1447264	F47G6.4_1446949_1447264	+	-124.274	-0.394521	No
chrI	1447559	1447911	F47G6.4_1447559_1447911	+	-134.246	-0.381381	No
chrI	1448009	1448086	F47G6.4_1448009_1448086	+	-23.841	-0.309623	No
chrI	1448251	1449236	F47G6.4_1448251_1449236	+	-268.542	-0.272631	No
chrI	1450252	1454246	F47G6.4_1450252_1454246	+	-1814.35	-0.454269	No
chrI	1451542	1452804	F37F2.3_1451542_1452804	-	-451.171	-0.357505	No
chrI	1452892	1452937	F37F2.3_1452892_1452937	-	-10.427	-0.231711	No
chrI	1454382	1454431	F47G6.4_1454382_1454431	+	-5.407	-0.110347	No
chrI	1454752	1454801	F47G6.4_1454752_1454801	+	-11.74	-0.239592	No
chrI	1454913	1455675	F47G6.4_1454913_1455675	+	-274.555	-0.360308	No
chrI	1455766	1460230	F47G6.4_1455766_1460230	+	-1731.96	-0.387984	No
chrI	1460288	1460546	F47G6.4_1460288_1460546	+	-79.377	-0.307663	No
chrI	1460731	1461516	F47G6.4_1460731_1461516	+	-276.608	-0.352367	No
chrI	1461630	1461674	F47G6.4_1461630_1461674	+	-6.418	-0.145864	No
chrI	1461961	1463568	F47G6.4_1461961_1463568	+	-554.638	-0.345139	No
chrI	1463700	1463933	F47G6.4_1463700_1463933	+	-96.896	-0.415863	No
chrI	1464053	1464368	F47G6.4_1464053_1464368	+	-92.625	-0.294048	No
chrI	1464473	1465073	F47G6.4_1464473_1465073	+	-230.746	-0.384577	No
chrI	1465666	1466325	F47G6.3_1465666_1466325	+	-290.745	-0.441191	No
chrI	1466866	1468036	F47G6.3_1466866_1468036	+	-388.093	-0.331703	No
chrI	1468203	1468251	F47G6.3_1468203_1468251	+	-12.868	-0.268083	No
chrI	1468319	1468882	F47G6.3_1468319_1468882	+	-190.883	-0.339046	No
chrI	1468935	1468988	F47G6.3_1468935_1468988	+	-13.363	-0.252132	No
chrI	1469092	1469463	F47G6.3_1469092_1469463	+	-99.93	-0.269353	No
chrI	1471376	1475546	F47G6.2_1471376_1475546	+	-1764.55	-0.423153	No
chrI	1475780	1476368	F47G6.2_1475780_1476368	+	-224.268	-0.381408	No
chrI	1476470	1476640	F47G6.2_1476470_1476640	+	-51.62	-0.303647	No
chrI	1476816	1476973	F47G6.2_1476816_1476973	+	-32.213	-0.205178	No
chrI	1477088	1477136	F47G6.2_1477088_1477136	+	-8.592	-0.179	No
chrI	1477232	1477830	F47G6.2_1477232_1477830	+	-232.334	-0.388518	No
chrI	1478148	1478756	F47G6.2_1478148_1478756	+	-236.333	-0.388706	No
chrI	1478998	1479212	F47G6.2_1478998_1479212	+	-88.74	-0.414673	No
chrI	1479471	1479748	F47G6.2_1479471_1479748	+	-106.891	-0.385888	No
chrI	1483237	1484720	F47G6.1_1483237_1484720	+	-496.095	-0.334521	YES
chrI	1484878	1484924	F47G6.1_1484878_1484924	+	-13.048	-0.283652	No
chrI	1485061	1485927	F47G6.1_1485061_1485927	+	-338.778	-0.391199	YES
chrI	1486013	1486057	F47G6.1_1486013_1486057	+	-13.436	-0.305364	No
chrI	1486253	1487180	F47G6.1_1486253_1487180	+	-332.263	-0.358428	No
chrI	1487412	1487770	F47G6.1_1487412_1487770	+	-114.024	-0.318503	No
chrI	1488097	1488425	F47G6.1_1488097_1488425	+	-128.349	-0.391308	No
chrI	1488677	1489069	F47G6.1_1488677_1489069	+	-123.703	-0.315569	No
chrI	1489283	1490282	F47G6.1_1489283_1490282	+	-319.304	-0.319624	YES
chrI	1491482	1492387	Y92H12A.5_1491482_1492387	-	-617.656	-0.682493	YES
chrI	1492543	1494681	Y92H12A.5_1492543_1494681	-	-1302.42	-0.609177	YES
chrI	1494813	1495719	Y92H12A.5_1494813_1495719	-	-259.476	-0.286397	No
chrI	1495837	1495903	Y92H12A.5_1495837_1495903	-	-17.014	-0.257788	YES
chrI	1496016	1497065	Y92H12A.5_1496016_1497065	-	-690.958	-0.658683	No
chrI	1497143	1498799	Y92H12A.5_1497143_1498799	-	-824.909	-0.498133	YES
chrI	1499516	1500689	Y92H12A.5_1499516_1500689	-	-527.877	-0.450023	YES
chrI	1501235	1502690	Y92H12A.5_1501235_1502690	-	-746.841	-0.513293	YES
chrI	1503026	1504478	Y92H12A.5_1503026_1504478	-	-586.438	-0.403883	YES
chrI	1504810	1506881	Y92H12A.5_1504810_1506881	-	-860.954	-0.415719	YES
chrI	1507344	1511225	Y92H12A.5_1507344_1511225	-	-2401	-0.618655	YES
chrI	1512015	1514205	Y92H12A.5_1512015_1514205	-	-1337.03	-0.610516	YES
chrI	1514901	1514955	Y92H12A.4_1514901_1514955	+	-13.86	-0.256667	No
chrI	1515060	1515111	Y92H12A.4_1515060_1515111	+	-14.745	-0.289118	No
chrI	1515187	1515233	Y92H12A.4_1515187_1515233	+	-7.29	-0.158478	YES
chrI	1515397	1517534	Y92H12A.4_1515397_1517534	+	-911.169	-0.426378	YES
chrI	1518122	1520159	Y92H12A.4_1518122_1520159	+	-1251.7	-0.614482	YES
chrI	1520272	1522175	Y92H12A.4_1520272_1522175	+	-1452.5	-0.763269	YES
chrI	1522460	1524299	Y92H12A.4_1522460_1524299	+	-737.315	-0.400933	No
chrI	1524645	1525846	Y92H12A.4_1524645_1525846	+	-492.689	-0.410232	YES
chrI	1526007	1526978	Y92H12A.4_1526007_1526978	+	-629.331	-0.648127	YES
chrI	1530100	1532238	Y92H12A.3_1530100_1532238	+	-905.632	-0.423588	YES
chrI	1532399	1533101	Y92H12A.3_1532399_1533101	+	-348.823	-0.496899	YES
chrI	1533286	1533939	Y92H12A.3_1533286_1533939	+	-190.113	-0.291138	No
chrI	1534053	1534117	Y92H12A.3_1534053_1534117	+	-9.94	-0.155312	No
chrI	1543682	1543825	Y92H12A.2_1543682_1543825	+	-49.039	-0.34293	No
chrI	1543975	1544286	Y92H12A.2_1543975_1544286	+	-91.458	-0.294077	YES
chrI	1544492	1544762	Y92H12A.2_1544492_1544762	+	-107.948	-0.399807	No
chrI	1544966	1545632	Y92H12A.2_1544966_1545632	+	-232.129	-0.348542	No
chrI	1545765	1550352	Y92H12A.2_1545765_1550352	+	-1778.79	-0.387789	YES
chrI	1550730	1552000	Y92H12A.2_1550730_1552000	+	-614.256	-0.483666	YES
chrI	1552114	1552704	Y92H12A.2_1552114_1552704	+	-172.394	-0.292193	YES
chrI	1552850	1553517	Y92H12A.2_1552850_1553517	+	-227.721	-0.341411	YES
chrI	1553884	1554798	Y92H12A.2_1553884_1554798	+	-440.502	-0.48195	YES
chrI	1555124	1555788	Y92H12A.2_1555124_1555788	+	-285.541	-0.430032	YES
chrI	1567021	1567602	Y92H12A.1_1567021_1567602	+	-233.479	-0.401857	YES
chrI	1567687	1570350	Y92H12A.1_1567687_1570350	+	-1621.7	-0.608975	YES
chrI	1570683	1571934	Y92H12A.1_1570683_1571934	+	-728.829	-0.582597	YES
chrI	1572086	1574144	Y92H12A.1_1572086_1574144	+	-1197.94	-0.582089	YES
chrI	1574493	1577388	Y92H12A.1_1574493_1577388	+	-1480.85	-0.51152	YES
chrI	1577870	1579073	Y92H12A.1_1577870_1579073	+	-645.544	-0.536612	YES
chrI	1586341	1588638	Y73E7A.3_1586341_1588638	+	-980.857	-0.427017	No
chrI	1588745	1589459	Y73E7A.3_1588745_1589459	+	-293.427	-0.410962	No
chrI	1589653	1589716	Y73E7A.3_1589653_1589716	+	-15.099	-0.239667	No
chrI	1589801	1590701	Y73E7A.3_1589801_1590701	+	-362.129	-0.402366	No
chrI	1590936	1591006	Y73E7A.3_1590936_1591006	+	-17.469	-0.249557	No
chrI	1592297	1592349	Y73E7A.3_1592297_1592349	+	-12.865	-0.247404	No
chrI	1592424	1592517	Y73E7A.3_1592424_1592517	+	-17.952	-0.193032	No
chrI	1592625	1593350	Y73E7A.3_1592625_1593350	+	-373.372	-0.514996	No
chrI	1595139	1595903	Y73E7A.4_1595139_1595903	-	-280.356	-0.366958	YES
chrI	1600812	1600951	Y73E7A.5_1600812_1600951	-	-39.937	-0.287317	No
chrI	1601223	1601270	Y73E7A.5_1601223_1601270	-	-5.943	-0.126447	No
chrI	1601920	1601966	Y73E7A.2_1601920_1601966	+	-10.595	-0.230326	YES
chrI	1602320	1604482	Y73E7A.2_1602320_1604482	+	-1084.74	-0.50173	YES
chrI	1605045	1606378	Y73E7A.2_1605045_1606378	+	-461.5	-0.346212	No
chrI	1608064	1609913	Y73E7A.6_1608064_1609913	-	-428.003	-0.231478	YES
chrI	1610505	1610564	Y73E7A.9_1610505_1610564	+	-9.846	-0.166881	YES
chrI	1610902	1611487	Y73E7A.9_1610902_1611487	+	-191.755	-0.327786	No
chrI	1611596	1611747	Y73E7A.9_1611596_1611747	+	-51.388	-0.340318	No
chrI	1611829	1613478	Y73E7A.9_1611829_1613478	+	-727.965	-0.441458	YES
chrI	1613897	1616100	Y73E7A.9_1613897_1616100	+	-1349.96	-0.612783	YES
chrI	1616262	1617834	Y73E7A.9_1616262_1617834	+	-898.903	-0.571821	No
chrI	1617970	1619628	Y73E7A.9_1617970_1619628	+	-740.059	-0.446356	YES
chrI	1621705	1622401	Y73E7A.7_1621705_1622401	-	-273.978	-0.393647	YES
chrI	1622623	1623183	Y73E7A.7_1622623_1623183	-	-421.496	-0.752671	No
chrI	1623341	1623776	Y73E7A.7_1623341_1623776	-	-188.471	-0.433267	No
chrI	1623879	1624776	Y73E7A.7_1623879_1624776	-	-333.537	-0.371836	YES
chrI	1625005	1626345	Y73E7A.7_1625005_1626345	-	-535.772	-0.39983	No
chrI	1629119	1629164	Y73E7A.1_1629119_1629164	+	-7.268	-0.161511	No
chrI	1629227	1629283	Y73E7A.1_1629227_1629283	+	-11.229	-0.200518	No
chrI	1629411	1630554	Y73E7A.1_1629411_1630554	+	-610.782	-0.534367	YES
chrI	1630795	1633222	Y73E7A.1_1630795_1633222	+	-1305.02	-0.537709	YES
chrI	1634861	1637279	Y73E7A.8_1634861_1637279	+	-966.232	-0.3996	YES
chrI	1637402	1638571	Y73E7A.8_1637402_1638571	+	-220.902	-0.188967	No
chrI	1639066	1640091	Y73E7A.8_1639066_1640091	+	-359.832	-0.351056	No
chrI	1640850	1641300	Y73E7A.8_1640850_1641300	+	-143.413	-0.318696	No
chrI	1641571	1642616	Y73E7A.8_1641571_1642616	+	-323.368	-0.309443	No
chrI	1643010	1643936	Y73E7A.8_1643010_1643936	+	-357.967	-0.386573	No
chrI	1644168	1644550	Y73E7A.8_1644168_1644550	+	-167.049	-0.437301	No
chrI	1645027	1645526	Y71G12B.20_1645027_1645526	-	-193.654	-0.388084	YES
chrI	1646271	1646959	Y71G12B.20_1646271_1646959	-	-272.82	-0.396541	YES
chrI	1647049	1647118	Y71G12B.20_1647049_1647118	-	-22.577	-0.327203	YES
chrI	1647237	1648104	Y71G12B.20_1647237_1648104	-	-533.689	-0.615558	YES
chrI	1648476	1649363	Y71G12B.20_1648476_1649363	-	-411.02	-0.463382	YES
chrI	1649786	1651184	Y71G12B.20_1649786_1651184	-	-489.769	-0.350335	YES
chrI	1653001	1653438	Y71G12B.18_1653001_1653438	+	-120.519	-0.275787	No
chrI	1653672	1653901	Y71G12B.18_1653672_1653901	+	-73.158	-0.319467	No
chrI	1653982	1654754	Y71G12B.18_1653982_1654754	+	-240.621	-0.311685	No
chrI	1654976	1655026	Y71G12B.18_1654976_1655026	+	-9.951	-0.19902	No
chrI	1655936	1656377	Y71G12B.21_1655936_1656377	-	-173.232	-0.392816	No
chrI	1657645	1657692	Y71G12B.33_1657645_1657692	-	-13.586	-0.289064	No
chrI	1657870	1660833	Y71G12B.33_1657870_1660833	-	-1460.93	-0.493058	No
chrI	1661042	1663274	Y71G12B.33_1661042_1663274	-	-1031	-0.461918	No
chrI	1663551	1663888	Y71G12B.22_1663551_1663888	-	-118.815	-0.352567	No
chrI	1664406	1666635	Y71G12B.22_1664406_1666635	-	-1418	-0.63616	No
chrI	1667741	1668165	Y71G12B.17_1667741_1668165	+	-157.371	-0.371158	No
chrI	1668273	1668344	Y71G12B.17_1668273_1668344	+	-27.931	-0.393394	No
chrI	1668536	1668612	Y71G12B.17_1668536_1668612	+	-17.741	-0.233434	No
chrI	1668855	1669488	Y71G12B.17_1668855_1669488	+	-213.082	-0.336622	No
chrI	1670286	1670970	Y71G12B.23_1670286_1670970	-	-246.531	-0.360425	No
chrI	1671257	1671781	Y71G12B.23_1671257_1671781	-	-184.136	-0.351405	No
chrI	1671874	1671942	Y71G12B.23_1671874_1671942	-	-15.364	-0.225941	No
chrI	1672018	1672079	Y71G12B.23_1672018_1672079	-	-20.25	-0.331967	No
chrI	1672282	1672685	Y71G12B.23_1672282_1672685	-	-179.977	-0.446593	No
chrI	1673226	1673745	Y71G12B.35_1673226_1673745	-	-311.139	-0.599497	No
chrI	1673941	1674942	Y71G12B.35_1673941_1674942	-	-486.127	-0.485641	YES
chrI	1675165	1675218	Y71G12B.35_1675165_1675218	-	-9.419	-0.177717	No
chrI	1675388	1676325	Y71G12B.35_1675388_1676325	-	-386.589	-0.412582	YES
chrI	1680560	1681629	Y71G12B.16_1680560_1681629	+	-473.742	-0.443164	YES
chrI	1681900	1682831	Y71G12B.16_1681900_1682831	+	-330.816	-0.355334	No
chrI	1683433	1684382	Y71G12B.16_1683433_1684382	+	-410.598	-0.432664	No
chrI	1684451	1684829	Y71G12B.16_1684451_1684829	+	-155.008	-0.410074	No
chrI	1686332	1686384	Y71G12B.31_1686332_1686384	-	-7.964	-0.153154	No
chrI	1686471	1687766	Y71G12B.31_1686471_1687766	-	-521.277	-0.402531	YES
chrI	1688089	1691051	Y71G12B.31_1688089_1691051	-	-1278.57	-0.431658	YES
chrI	1691207	1691280	Y71G12B.31_1691207_1691280	-	-26.07	-0.357123	YES
chrI	1691339	1691404	Y71G12B.31_1691339_1691404	-	-14.509	-0.223215	No
chrI	1691498	1691562	Y71G12B.31_1691498_1691562	-	-14.832	-0.23175	No
chrI	1698619	1699657	Y71G12B.15_1698619_1699657	+	-467.099	-0.449999	YES
chrI	1700012	1700679	Y71G12B.15_1700012_1700679	+	-257.159	-0.385546	YES
chrI	1701486	1701579	Y71G12B.14_1701486_1701579	+	-26.638	-0.28643	YES
chrI	1702151	1702573	Y71G12B.13_1702151_1702573	+	-144.975	-0.343543	YES
chrI	1702690	1703963	Y71G12B.13_1702690_1703963	+	-881.503	-0.692461	YES
chrI	1704488	1705662	Y71G12B.13_1704488_1705662	+	-410.016	-0.349247	No
chrI	1705757	1705799	Y71G12B.13_1705757_1705799	+	-9.286	-0.221095	YES
chrI	1706007	1707337	Y71G12B.13_1706007_1707337	+	-670.325	-0.504004	YES
chrI	1709120	1709588	Y71G12B.12_1709120_1709588	+	-155.943	-0.333212	YES
chrI	1709735	1710670	Y71G12B.12_1709735_1710670	+	-243.453	-0.260378	YES
chrI	1710998	1712711	Y71G12B.12_1710998_1712711	+	-570.059	-0.332784	YES
chrI	1712830	1715163	Y71G12B.12_1712830_1715163	+	-876.669	-0.375769	YES
chrI	1721731	1721911	Y71G12B.11_1721731_1721911	+	-62.889	-0.349383	YES
chrI	1722461	1725048	Y71G12B.11_1722461_1725048	+	-1034.61	-0.399927	YES
chrI	1725440	1726667	Y71G12B.11_1725440_1726667	+	-656.896	-0.535368	YES
chrI	1727128	1728206	Y71G12B.11_1727128_1728206	+	-438.665	-0.406925	YES
chrI	1728820	1730818	Y71G12B.11_1728820_1730818	+	-791.697	-0.396245	YES
chrI	1731575	1732793	Y71G12B.11_1731575_1732793	+	-613.936	-0.504053	YES
chrI	1733372	1734448	Y71G12B.11_1733372_1734448	+	-522.362	-0.485467	YES
chrI	1738529	1738828	Y71G12B.11_1738529_1738828	+	-139.635	-0.467007	YES
chrI	1739212	1740058	Y71G12B.11_1739212_1740058	+	-305.625	-0.361259	YES
chrI	1740919	1742491	Y71G12B.24_1740919_1742491	-	-799.502	-0.508589	YES
chrI	1742842	1745738	Y71G12B.24_1742842_1745738	-	-1477.07	-0.510038	YES
chrI	1746047	1748288	Y71G12B.24_1746047_1748288	-	-478.811	-0.21366	YES
chrI	1748697	1750736	Y71G12B.24_1748697_1750736	-	-1271.23	-0.623458	YES
chrI	1751587	1751648	Y71G12B.10_1751587_1751648	+	-13.587	-0.222738	No
chrI	1751861	1752605	Y71G12B.10_1751861_1752605	+	-540.558	-0.726556	YES
chrI	1752939	1754000	Y71G12B.10_1752939_1754000	+	-727.018	-0.68522	YES
chrI	1755464	1758852	Y71G12B.9_1755464_1758852	+	-1068.47	-0.315369	No
chrI	1759539	1760458	Y71G12B.9_1759539_1760458	+	-213.041	-0.231818	No
chrI	1760692	1762292	Y71G12B.9_1760692_1762292	+	-586.09	-0.366306	No
chrI	1762498	1763036	Y71G12B.9_1762498_1763036	+	-186.522	-0.346695	YES
chrI	1763259	1763590	Y71G12B.9_1763259_1763590	+	-107.672	-0.325293	No
chrI	1763847	1764658	Y71G12B.9_1763847_1764658	+	-251.72	-0.310382	No
chrI	1764898	1766007	Y71G12B.9_1764898_1766007	+	-329.148	-0.296797	No
chrI	1768501	1769866	Y71G12B.8_1768501_1769866	+	-614.703	-0.450332	YES
chrI	1771784	1773151	Y71G12B.25_1771784_1773151	-	-570.942	-0.417661	YES
chrI	1773711	1775495	Y71G12B.25_1773711_1775495	-	-1204.16	-0.674978	YES
chrI	1780128	1780711	Y71G12B.26_1780128_1780711	-	-205.508	-0.352501	No
chrI	1781064	1781114	Y71G12B.26_1781064_1781114	-	-3.325	-0.0665	No
chrI	1781499	1781885	Y71G12B.26_1781499_1781885	-	-136.831	-0.354484	No
chrI	1782037	1782511	Y71G12B.26_1782037_1782511	-	-188.652	-0.398	No
chrI	1783818	1784892	Y71G12B.8_1783818_1784892	+	-320.482	-0.2984	YES
chrI	1785385	1787037	Y71G12B.8_1785385_1787037	+	-898.072	-0.543627	YES
chrI	1787427	1789558	Y71G12B.8_1787427_1789558	+	-596.322	-0.279832	No
chrI	1792507	1792561	Y71G12B.7_1792507_1792561	+	-10.026	-0.185667	No
chrI	1793366	1793793	Y71G12B.6_1793366_1793793	+	-184.455	-0.431979	YES
chrI	1793970	1794623	Y71G12B.6_1793970_1794623	+	-208.656	-0.319534	YES
chrI	1795109	1795352	Y71G12B.6_1795109_1795352	+	-53.923	-0.221905	YES
chrI	1795455	1796062	Y71G12B.6_1795455_1796062	+	-210.465	-0.34673	YES
chrI	1797653	1798503	Y71G12B.27_1797653_1798503	-	-327.805	-0.385653	No
chrI	1799917	1800872	Y71G12B.5_1799917_1800872	+	-397.76	-0.416503	No
chrI	1801035	1801086	Y71G12B.5_1801035_1801086	+	-15.783	-0.309471	No
chrI	1801229	1801293	Y71G12B.5_1801229_1801293	+	-11.759	-0.183734	No
chrI	1801650	1801703	Y71G12B.5_1801650_1801703	+	-2.101	-0.0396415	No
chrI	1802060	1802519	Y71G12B.5_1802060_1802519	+	-136.464	-0.297307	No
chrI	1802882	1803476	Y71G12B.5_1802882_1803476	+	-240.242	-0.404448	No
chrI	1803899	1803945	Y71G12B.5_1803899_1803945	+	-6.087	-0.132326	No
chrI	1804314	1804362	Y71G12B.5_1804314_1804362	+	-18.907	-0.393896	No
chrI	1804727	1806385	Y71G12B.5_1804727_1806385	+	-562.859	-0.339481	No
chrI	1806692	1806737	Y71G12B.5_1806692_1806737	+	-10	-0.222222	No
chrI	1808225	1809454	Y71G12B.4_1808225_1809454	+	-399.486	-0.32505	No
chrI	1809716	1811063	Y71G12B.4_1809716_1811063	+	-775.235	-0.575527	YES
chrI	1813268	1813428	Y71G12B.3_1813268_1813428	+	-74.019	-0.462619	No
chrI	1814241	1814870	Y71G12B.32_1814241_1814870	-	-267.533	-0.425331	No
chrI	1815297	1815843	Y71G12B.32_1815297_1815843	-	-196.582	-0.36004	No
chrI	1815920	1815968	Y71G12B.32_1815920_1815968	-	-13.807	-0.287646	No
chrI	1816222	1816948	Y71G12B.2_1816222_1816948	+	-166.958	-0.22997	No
chrI	1817246	1817302	Y71G12B.2_1817246_1817302	+	-16.659	-0.297482	No
chrI	1817614	1817970	Y71G12B.2_1817614_1817970	+	-186.158	-0.522916	No
chrI	1818116	1818359	Y71G12B.2_1818116_1818359	+	-112.996	-0.465004	No
chrI	1818690	1819014	Y71G12B.30_1818690_1819014	-	-138.987	-0.428972	No
chrI	1819330	1820492	Y71G12B.30_1819330_1820492	-	-655.232	-0.563883	No
chrI	1820786	1822145	Y71G12B.30_1820786_1822145	-	-733.614	-0.539819	No
chrI	1822258	1822753	Y71G12B.30_1822258_1822753	-	-205.192	-0.414529	No
chrI	1823575	1823626	Y71G12B.1_1823575_1823626	+	-16.373	-0.321039	YES
chrI	1823771	1823843	Y71G12B.1_1823771_1823843	+	-16.659	-0.231375	No
chrI	1823965	1824020	Y71G12B.1_1823965_1824020	+	-9.365	-0.170273	YES
chrI	1824129	1824171	Y71G12B.1_1824129_1824171	+	-6.511	-0.155024	YES
chrI	1824538	1825306	Y71G12B.1_1824538_1825306	+	-572.182	-0.745029	YES
chrI	1829830	1830448	Y71G12B.28_1829830_1830448	+	-455.766	-0.737485	No
chrI	1830579	1830626	Y71G12B.28_1830579_1830626	+	-9.607	-0.204404	No
chrI	1830684	1831801	Y71G12B.28_1830684_1831801	+	-562.872	-0.503914	No
chrI	1832425	1832481	C53H9.3_1832425_1832481	-	-10.595	-0.189196	No
chrI	1833173	1833220	C53H9.2_1833173_1833220	+	-9.113	-0.193894	YES
chrI	1833331	1833381	C53H9.2_1833331_1833381	+	-15.131	-0.30262	YES
chrI	1833385	1833452	C53H9.2_1833385_1833452	+	-21.806	-0.325463	YES
chrI	1833724	1833771	C53H9.2_1833724_1833771	+	-9.686	-0.206085	No
chrI	1834139	1834188	C53H9.2_1834139_1834188	+	-9.087	-0.185449	No
chrI	1834271	1834396	C53H9.2_1834271_1834396	+	-45.252	-0.362016	YES
chrI	1835046	1835093	C53H9.1_1835046_1835093	+	-7.892	-0.167915	YES
chrI	1835231	1835279	C53H9.1_1835231_1835279	+	-8.217	-0.171187	YES
chrI	1836055	1838160	M01D7.7_1836055_1838160	+	-799.624	-0.379869	YES
chrI	1838288	1838781	M01D7.7_1838288_1838781	+	-202.151	-0.410043	YES
chrI	1838999	1839065	M01D7.7_1838999_1839065	+	-13.977	-0.211773	No
chrI	1839194	1839252	M01D7.7_1839194_1839252	+	-16.673	-0.287466	YES
chrI	1839382	1840096	M01D7.7_1839382_1840096	+	-254.105	-0.355889	YES
chrI	1840250	1840320	M01D7.7_1840250_1840320	+	-20.404	-0.291486	YES
chrI	1840428	1840807	M01D7.7_1840428_1840807	+	-147.145	-0.388245	YES
chrI	1842600	1842674	M01D7.6_1842600_1842674	+	-19.496	-0.263459	No
chrI	1842925	1842977	M01D7.6_1842925_1842977	+	-15.209	-0.292481	YES
chrI	1843463	1843542	M01D7.5_1843463_1843542	+	-16.96	-0.214684	No
chrI	1843601	1843658	M01D7.5_1843601_1843658	+	-8.665	-0.152018	YES
chrI	1845319	1846344	M01D7.4_1845319_1846344	+	-479.605	-0.467907	YES
chrI	1846720	1848134	M01D7.4_1846720_1848134	+	-715.215	-0.50581	YES
chrI	1848387	1848910	M01D7.4_1848387_1848910	+	-172.118	-0.329098	No
chrI	1849103	1850054	M01D7.4_1849103_1850054	+	-494.831	-0.520327	YES
chrI	1851919	1852164	M01D7.9_1851919_1852164	-	-82.767	-0.337824	No
chrI	1852247	1852324	M01D7.9_1852247_1852324	-	-19.139	-0.248558	YES
chrI	1852395	1854975	M01D7.9_1852395_1854975	-	-1378.31	-0.534229	YES
chrI	1858178	1859215	M01D7.1_1858178_1859215	-	-348	-0.335583	No
chrI	1859525	1860068	M01D7.1_1859525_1860068	-	-192.881	-0.355214	No
chrI	1860332	1860413	M01D7.1_1860332_1860413	-	-25.276	-0.312049	No
chrI	1860490	1860532	M01D7.1_1860490_1860532	-	-10.046	-0.23919	No
chrI	1863220	1865399	M01D7.2_1863220_1865399	-	-1390.89	-0.638316	YES
chrI	1865846	1869152	M01D7.2_1865846_1869152	-	-1208.94	-0.365681	YES
chrI	1869300	1870930	M01D7.2_1869300_1870930	-	-670.904	-0.411598	YES
chrI	1871062	1872248	M01D7.2_1871062_1872248	-	-530.397	-0.447215	YES
chrI	1875300	1876519	Y71G12A.3_1875300_1876519	+	-468.063	-0.383973	YES
chrI	1876769	1877637	Y71G12A.3_1876769_1877637	+	-502.6	-0.579032	YES
chrI	1877725	1879505	Y71G12A.3_1877725_1879505	+	-794.225	-0.446194	YES
chrI	1880211	1881930	Y71G12A.3_1880211_1881930	+	-730.922	-0.425202	YES
chrI	1882236	1883336	Y71G12A.3_1882236_1883336	+	-529.582	-0.481438	YES
chrI	1885431	1890782	Y71G12A.4_1885431_1890782	-	-4195.11	-0.783986	No
chrI	1891025	1892270	Y71G12A.4_1891025_1892270	-	-650.395	-0.522406	No
chrI	1892571	1892642	Y71G12A.4_1892571_1892642	-	-29.894	-0.421042	No
chrI	1892874	1893698	Y71G12A.4_1892874_1893698	-	-283.689	-0.344283	No
chrI	1893987	1894670	Y71G12A.4_1893987_1894670	-	-391.436	-0.573113	No
chrI	1894746	1894839	Y71G12A.4_1894746_1894839	-	-50.334	-0.541226	No
chrI	1895306	1895357	Y71G12A.2_1895306_1895357	+	-11.071	-0.217078	YES
chrI	1895439	1895499	Y71G12A.2_1895439_1895499	+	-10.769	-0.179483	YES
chrI	1895698	1896476	Y71G12A.2_1895698_1896476	+	-519.214	-0.66737	YES
chrI	1896779	1899029	Y71G12A.2_1896779_1899029	+	-1182.46	-0.525538	YES
chrI	1899428	1900019	Y71G12A.2_1899428_1900019	+	-201.87	-0.341574	YES
chrI	1900078	1900311	Y71G12A.2_1900078_1900311	+	-41.129	-0.176519	YES
chrI	1900384	1902511	Y71G12A.2_1900384_1902511	+	-1237.47	-0.581791	YES
chrI	1902900	1904346	Y71G12A.2_1902900_1904346	+	-512.777	-0.354618	YES
chrI	1904604	1906019	Y71G12A.2_1904604_1906019	+	-619.642	-0.43791	No
chrI	1906242	1908200	Y71G12A.2_1906242_1908200	+	-1088.36	-0.555853	YES
chrI	1908507	1910216	Y71G12A.2_1908507_1910216	+	-468.767	-0.274293	No
chrI	1911946	1913437	Y51F10.7_1911946_1913437	-	-1034.01	-0.693501	YES
chrI	1917105	1917751	Y51F10.6_1917105_1917751	+	-407.823	-0.631305	YES
chrI	1918233	1919231	Y51F10.6_1918233_1919231	+	-515.493	-0.516526	YES
chrI	1919341	1922786	Y51F10.6_1919341_1922786	+	-1452.43	-0.421605	YES
chrI	1924527	1925970	Y51F10.5_1924527_1925970	+	-485.457	-0.336422	No
chrI	1926276	1928160	Y51F10.5_1926276_1928160	+	-1028.04	-0.545669	YES
chrI	1928599	1929522	Y51F10.5_1928599_1929522	+	-461.832	-0.50036	YES
chrI	1929587	1929746	Y51F10.5_1929587_1929746	+	-45.852	-0.288377	YES
chrI	1929878	1931812	Y51F10.5_1929878_1931812	+	-772.922	-0.399649	YES
chrI	1932445	1934579	Y51F10.4_1932445_1934579	+	-836.007	-0.391756	YES
chrI	1935007	1938400	Y51F10.4_1935007_1938400	+	-1681.28	-0.495514	YES
chrI	1938919	1941132	Y51F10.4_1938919_1941132	+	-1011.28	-0.456972	YES
chrI	1941588	1943442	Y51F10.4_1941588_1943442	+	-613.038	-0.330657	No
chrI	1943599	1944888	Y51F10.4_1943599_1944888	+	-326.659	-0.25342	No
chrI	1950909	1951131	Y51F10.10_1950909_1951131	-	-63.31	-0.28518	No
chrI	1951236	1953350	Y51F10.10_1951236_1953350	-	-1023.65	-0.484224	YES
chrI	1953626	1955271	Y51F10.10_1953626_1955271	-	-940.88	-0.571964	YES
chrI	1955448	1956866	Y51F10.10_1955448_1956866	-	-508.835	-0.35884	YES
chrI	1957055	1958061	Y51F10.10_1957055_1958061	-	-436.621	-0.434017	YES
chrI	1958168	1958431	Y51F10.10_1958168_1958431	-	-56.033	-0.213053	YES
chrI	1961918	1963140	Y51F10.11_1961918_1963140	+	-552.002	-0.45172	YES
chrI	1963289	1964835	Y51F10.11_1963289_1964835	+	-648.171	-0.419257	YES
chrI	1967944	1969758	Y51F10.3_1967944_1969758	+	-1064.66	-0.586913	YES
chrI	1970227	1972608	Y51F10.3_1970227_1972608	+	-1348.68	-0.566434	YES
chrI	1972895	1973561	Y51F10.3_1972895_1973561	+	-201.371	-0.302359	YES
chrI	1978133	1978522	Y51F10.2_1978133_1978522	+	-115.561	-0.297072	No
chrI	1978671	1979461	Y51F10.2_1978671_1979461	+	-539.304	-0.682663	YES
chrI	1979601	1981368	Y51F10.2_1979601_1981368	+	-1019.09	-0.576735	YES
chrI	1981819	1983183	Y51F10.2_1981819_1983183	+	-604.628	-0.443276	No
chrI	1988899	1990032	Y20F4.3_1988899_1990032	-	-486.164	-0.429094	No
chrI	1990558	1991670	Y20F4.3_1990558_1991670	-	-295.142	-0.265415	No
chrI	1991796	1993296	Y20F4.3_1991796_1993296	-	-454.739	-0.303159	YES
chrI	1993524	1995987	Y20F4.3_1993524_1995987	-	-1133.42	-0.460179	YES
chrI	1996248	1997746	Y20F4.3_1996248_1997746	-	-735.858	-0.491227	YES
chrI	1997928	1999955	Y20F4.3_1997928_1999955	-	-714.471	-0.352477	No
chrI	2000044	2000127	Y20F4.3_2000044_2000127	-	-14.407	-0.173578	No
chrI	2000218	2001067	Y20F4.3_2000218_2001067	-	-421.37	-0.496313	YES
chrI	2001196	2006132	Y20F4.3_2001196_2006132	-	-2802.87	-0.567842	YES
chrI	2006307	2007324	Y20F4.3_2006307_2007324	-	-534.687	-0.525749	YES
chrI	2007569	2008590	Y20F4.3_2007569_2008590	-	-555.369	-0.543946	YES
chrI	2008773	2009832	Y20F4.3_2008773_2009832	-	-605.158	-0.571443	YES
chrI	2009962	2010006	Y20F4.3_2009962_2010006	-	-9.122	-0.207318	No
chrI	2010101	2010167	Y20F4.3_2010101_2010167	-	-13.482	-0.204273	YES
chrI	2010260	2010422	Y20F4.3_2010260_2010422	-	-33.637	-0.207636	No
chrI	2026517	2027827	Y20F4.2_2026517_2027827	+	-519.304	-0.396415	YES
chrI	2027905	2028208	Y20F4.2_2027905_2028208	+	-84.326	-0.278304	No
chrI	2028340	2028391	Y20F4.2_2028340_2028391	+	-7.787	-0.152686	No
chrI	2028597	2029676	Y20F4.2_2028597_2029676	+	-313.363	-0.29042	YES
chrI	2029976	2031652	Y20F4.2_2029976_2031652	+	-818.658	-0.488459	YES
chrI	2032130	2033277	Y20F4.2_2032130_2033277	+	-457.486	-0.398854	YES
chrI	2034713	2035686	Y20F4.4_2034713_2035686	-	-581.185	-0.597312	YES
chrI	2036012	2037152	Y20F4.4_2036012_2037152	-	-438.223	-0.384406	No
chrI	2037330	2037399	Y20F4.4_2037330_2037399	-	-14.411	-0.208855	No
chrI	2037539	2037583	Y20F4.4_2037539_2037583	-	-9.168	-0.208364	No
chrI	2037727	2037772	Y20F4.4_2037727_2037772	-	-2.525	-0.0561111	No
chrI	2037922	2037976	Y20F4.4_2037922_2037976	-	-12.839	-0.237759	No
chrI	2038049	2038097	Y20F4.4_2038049_2038097	-	-13.43	-0.279792	No
chrI	2038358	2038403	Y20F4.4_2038358_2038403	-	-7.558	-0.167956	No
chrI	2038529	2038573	Y20F4.4_2038529_2038573	-	-7.943	-0.180523	No
chrI	2038694	2038745	Y20F4.4_2038694_2038745	-	-11.661	-0.228647	No
chrI	2038838	2038890	Y20F4.4_2038838_2038890	-	-9.478	-0.182269	No
chrI	2039001	2039043	Y20F4.4_2039001_2039043	-	-5.652	-0.134571	No
chrI	2039116	2039166	Y20F4.4_2039116_2039166	-	-11.38	-0.2276	No
chrI	2039505	2040541	Y20F4.4_2039505_2040541	-	-441.231	-0.425899	No
chrI	2040663	2041367	Y20F4.4_2040663_2041367	-	-322.406	-0.457963	YES
chrI	2042741	2043581	Y20F4.4_2042741_2043581	-	-564.757	-0.67233	YES
chrI	2043704	2043757	Y20F4.4_2043704_2043757	-	-16.015	-0.30217	YES
chrI	2050855	2050899	Y20F4.5_2050855_2050899	-	-4.997	-0.113568	YES
chrI	2051020	2051119	Y20F4.5_2051020_2051119	-	-27.026	-0.27299	No
chrI	2051715	2051790	Y20F4.5_2051715_2051790	-	-14.388	-0.19184	No
chrI	2052696	2053117	Y20F4.5_2052696_2053117	-	-135.926	-0.322865	No
chrI	2053342	2053413	Y20F4.5_2053342_2053413	-	-12.2	-0.171831	No
chrI	2061885	2061939	Y37E3.1_2061885_2061939	-	-16.375	-0.303241	No
chrI	2062066	2062796	Y37E3.1_2062066_2062796	-	-456.383	-0.625182	YES
chrI	2063273	2063317	Y37E3.1_2063273_2063317	-	-13.605	-0.309205	No
chrI	2063421	2063485	Y37E3.1_2063421_2063485	-	-16.225	-0.253516	No
chrI	2063571	2063621	Y37E3.1_2063571_2063621	-	-12.629	-0.25258	No
chrI	2063769	2063825	Y37E3.1_2063769_2063825	-	-14.441	-0.257875	No
chrI	2064401	2064452	Y37E3.3_2064401_2064452	+	-11.25	-0.220588	YES
chrI	2064695	2065114	Y37E3.3_2064695_2065114	+	-131.483	-0.313802	YES
chrI	2065172	2065235	Y37E3.4_2065172_2065235	+	-4.479	-0.0710952	YES
chrI	2065819	2066706	Y37E3.5_2065819_2066706	+	-300.99	-0.339335	No
chrI	2066777	2066837	Y37E3.5_2066777_2066837	+	-10.594	-0.176567	No
chrI	2066974	2067178	Y37E3.5_2066974_2067178	+	-81.799	-0.400975	No
chrI	2067241	2068040	Y37E3.5_2067241_2068040	+	-290.957	-0.364151	No
chrI	2068148	2068247	Y37E3.5_2068148_2068247	+	-18.388	-0.185737	No
chrI	2068313	2068359	Y37E3.5_2068313_2068359	+	-11.438	-0.248652	No
chrI	2068455	2068507	Y37E3.5_2068455_2068507	+	-7.004	-0.134692	No
chrI	2068830	2068871	Y37E3.5_2068830_2068871	+	-9.657	-0.235537	No
chrI	2069296	2069345	Y37E3.7_2069296_2069345	-	-6.1	-0.12449	YES
chrI	2069840	2070054	Y37E3.8_2069840_2070054	-	-75.904	-0.354692	YES
chrI	2070210	2070428	Y37E3.8_2070210_2070428	-	-68.04	-0.31211	YES
chrI	2071757	2071826	Y37E3.9_2071757_2071826	+	-15.833	-0.229464	YES
chrI	2071943	2071992	Y37E3.9_2071943_2071992	+	-10.501	-0.214306	No
chrI	2072809	2073421	Y37E3.10_2072809_2073421	+	-464.61	-0.759167	YES
chrI	2073969	2074709	Y37E3.10_2073969_2074709	+	-361.038	-0.487889	YES
chrI	2074958	2075989	Y37E3.10_2074958_2075989	+	-749.142	-0.726617	YES
chrI	2076395	2076693	Y37E3.10_2076395_2076693	+	-181.467	-0.60895	YES
chrI	2079029	2079266	Y37E3.11_2079029_2079266	+	-123.951	-0.523	YES
chrI	2079360	2080746	Y37E3.11_2079360_2080746	+	-662.412	-0.477931	YES
chrI	2080903	2081115	Y37E3.11_2080903_2081115	+	-59.658	-0.281406	YES
chrI	2081312	2081958	Y37E3.11_2081312_2081958	+	-406.276	-0.62891	YES
chrI	2081979	2082816	Y37E3.11_2081979_2082816	+	-493.68	-0.589821	YES
chrI	2083032	2084341	Y37E3.11_2083032_2084341	+	-672.116	-0.513458	YES
chrI	2084419	2084481	Y37E3.11_2084419_2084481	+	-15.771	-0.254371	YES
chrI	2084553	2085253	Y37E3.11_2084553_2085253	+	-331.749	-0.473927	YES
chrI	2085818	2086938	Y37E3.13_2085818_2086938	-	-624.027	-0.557167	YES
chrI	2087410	2087742	Y37E3.13_2087410_2087742	-	-172.549	-0.519726	YES
chrI	2087896	2088250	Y37E3.13_2087896_2088250	-	-139.23	-0.393305	No
chrI	2088339	2090425	Y37E3.13_2088339_2090425	-	-878.894	-0.42133	No
chrI	2090594	2092213	Y37E3.13_2090594_2092213	-	-769.589	-0.475348	No
chrI	2092503	2093697	Y37E3.13_2092503_2093697	-	-474.114	-0.39708	No
chrI	2097448	2097502	Y37E3.15_2097448_2097502	+	-12.609	-0.2335	YES
chrI	2097742	2098592	Y37E3.15_2097742_2098592	+	-628.66	-0.7396	YES
chrI	2098709	2100626	Y37E3.15_2098709_2100626	+	-1372.03	-0.715717	YES
chrI	2101007	2102145	Y37E3.15_2101007_2102145	+	-503.141	-0.442127	YES
chrI	2102569	2103200	Y37E3.15_2102569_2103200	+	-243.766	-0.386317	YES
chrI	2103292	2103940	Y37E3.15_2103292_2103940	+	-502.166	-0.774948	YES
chrI	2104043	2105186	Y37E3.15_2104043_2105186	+	-672.4	-0.588276	YES
chrI	2105445	2110134	Y37E3.15_2105445_2110134	+	-2261.2	-0.482235	YES
chrI	2107816	2108530	Y37E3.19_2107816_2108530	-	-363.094	-0.508535	No
chrI	2110452	2111387	Y37E3.15_2110452_2111387	+	-503.563	-0.53857	YES
chrI	2113933	2115255	Y37E3.16_2113933_2115255	-	-821.11	-0.621112	No
chrI	2115612	2116154	Y37E3.16_2115612_2116154	-	-247.636	-0.456893	No
chrI	2116406	2116452	Y37E3.16_2116406_2116452	-	-11.909	-0.258891	No
chrI	2116583	2116743	Y37E3.16_2116583_2116743	-	-69.016	-0.43135	No
chrI	2116862	2116983	Y37E3.16_2116862_2116983	-	-51.363	-0.424488	No
chrI	2117071	2117123	Y37E3.16_2117071_2117123	-	-17.755	-0.341442	No
chrI	2117345	2117937	Y37E3.16_2117345_2117937	-	-271.452	-0.458534	No
chrI	2118091	2118461	Y37E3.16_2118091_2118461	-	-154.541	-0.417678	No
chrI	2128776	2133854	Y37E3.17_2128776_2133854	+	-2104.72	-0.414478	YES
chrI	2133875	2134789	Y37E3.17_2133875_2134789	+	-383.448	-0.419527	YES
chrI	2134923	2135050	Y37E3.17_2134923_2135050	+	-38.466	-0.302882	No
chrI	2135146	2136533	Y37E3.17_2135146_2136533	+	-433.867	-0.31281	YES
chrI	2136905	2138636	Y37E3.17_2136905_2138636	+	-743.232	-0.429366	YES
chrI	2139241	2141032	Y37E3.17_2139241_2141032	+	-973.968	-0.543812	YES
chrI	2141219	2142455	Y37E3.17_2141219_2142455	+	-747.759	-0.604983	YES
chrI	2143093	2144880	Y37E3.17_2143093_2144880	+	-1055.51	-0.59066	YES
chrI	2144986	2145041	Y37E3.17_2144986_2145041	+	-15.107	-0.274673	YES
chrI	2145137	2145689	Y37E3.17_2145137_2145689	+	-341.62	-0.618877	YES
chrI	2160202	2163019	W03F11.6_2160202_2163019	+	-1161.45	-0.4123	YES
chrI	2163292	2164020	W03F11.6_2163292_2164020	+	-234.407	-0.321988	No
chrI	2164105	2164828	W03F11.6_2164105_2164828	+	-200.222	-0.276932	YES
chrI	2164987	2165977	W03F11.6_2164987_2165977	+	-388.631	-0.392557	YES
chrI	2166132	2172005	W03F11.6_2166132_2172005	+	-2625.6	-0.447063	YES
chrI	2172172	2173755	W03F11.6_2172172_2173755	+	-458.504	-0.289642	No
chrI	2173868	2173926	W03F11.6_2173868_2173926	+	-10.927	-0.188397	YES
chrI	2174024	2174890	W03F11.6_2174024_2174890	+	-265.695	-0.306807	No
chrI	2185920	2186632	W03F11.6_2185920_2186632	+	-193.786	-0.272171	No
chrI	2186715	2192845	W03F11.6_2186715_2192845	+	-2681.64	-0.437462	YES
chrI	2192907	2195400	W03F11.6_2192907_2195400	+	-836.506	-0.335542	YES
chrI	2196668	2197190	W03F11.6_2196668_2197190	+	-136.71	-0.261897	YES
chrI	2197286	2200011	W03F11.6_2197286_2200011	+	-1140.88	-0.418672	YES
chrI	2200151	2201731	W03F11.6_2200151_2201731	+	-306.597	-0.194049	No
chrI	2202170	2203575	W03F11.6_2202170_2203575	+	-465.798	-0.331529	YES
chrI	2203866	2204926	W03F11.6_2203866_2204926	+	-465.648	-0.439291	YES
chrI	2205310	2207321	W03F11.6_2205310_2207321	+	-662.486	-0.329431	YES
chrI	2207840	2209095	W03F11.6_2207840_2209095	+	-373.876	-0.297909	No
chrI	2216285	2217090	W03F11.5_2216285_2217090	+	-312.847	-0.38863	No
chrI	2217194	2217244	W03F11.5_2217194_2217244	+	-7.454	-0.14908	No
chrI	2217450	2218964	W03F11.5_2217450_2218964	+	-456.394	-0.301449	No
chrI	2219166	2219224	W03F11.5_2219166_2219224	+	-17.575	-0.303017	No
chrI	2219714	2220560	W03F11.1_2219714_2220560	-	-318.417	-0.376379	No
chrI	2220930	2222083	W03F11.1_2220930_2222083	-	-432.117	-0.374776	No
chrI	2222202	2222243	W03F11.1_2222202_2222243	-	-12.798	-0.312146	No
chrI	2223572	2223630	W03F11.2_2223572_2223630	-	-17.707	-0.305293	No
chrI	2223729	2224302	W03F11.2_2223729_2224302	-	-173.604	-0.302974	No
chrI	2224477	2224697	W03F11.2_2224477_2224697	-	-69.981	-0.318095	No
chrI	2224890	2225618	W03F11.2_2224890_2225618	-	-216.793	-0.297793	No
chrI	2226412	2226558	W03F11.2_2226412_2226558	-	-55.082	-0.377274	No
chrI	2226945	2227001	W03F11.2_2226945_2227001	-	-13.298	-0.237464	No
chrI	2227112	2228276	W03F11.2_2227112_2228276	-	-451.803	-0.388147	No
chrI	2228355	2228400	W03F11.2_2228355_2228400	-	-7.655	-0.170111	No
chrI	2228870	2230121	W03F11.2_2228870_2230121	-	-514.858	-0.411557	No
chrI	2230244	2230294	W03F11.2_2230244_2230294	-	-14.583	-0.29166	No
chrI	2230413	2230467	W03F11.2_2230413_2230467	-	-12.527	-0.231981	No
chrI	2230593	2231027	W03F11.2_2230593_2231027	-	-151.145	-0.34826	No
chrI	2231139	2231185	W03F11.2_2231139_2231185	-	-11.003	-0.239196	No
chrI	2231433	2231486	W03F11.2_2231433_2231486	-	-5.851	-0.110396	No
chrI	2231596	2232848	W03F11.2_2231596_2232848	-	-421.177	-0.336403	No
chrI	2233015	2233175	W03F11.2_2233015_2233175	-	-38.112	-0.2382	No
chrI	2233857	2233902	W03F11.3_2233857_2233902	-	-6.476	-0.143911	No
chrI	2233977	2234056	W03F11.3_2233977_2234056	-	-22.75	-0.287975	No
chrI	2234242	2234298	W03F11.3_2234242_2234298	-	-9.106	-0.162607	No
chrI	2234404	2234689	W03F11.3_2234404_2234689	-	-116.843	-0.409975	No
chrI	2234774	2234826	W03F11.3_2234774_2234826	-	-16.902	-0.325038	No
chrI	2236169	2236566	W03F11.4_2236169_2236566	-	-144.829	-0.364809	No
chrI	2236793	2236839	W03F11.4_2236793_2236839	-	-14.84	-0.322609	No
chrI	2236999	2237047	W03F11.4_2236999_2237047	-	-12.627	-0.263062	No
chrI	2237234	2237280	W03F11.4_2237234_2237280	-	-10.643	-0.23137	No
chrI	2237398	2237650	W03F11.4_2237398_2237650	-	-73.659	-0.292298	No
chrI	2237828	2237873	W03F11.4_2237828_2237873	-	-7.292	-0.162044	No
chrI	2238058	2238108	W03F11.4_2238058_2238108	-	-15.746	-0.31492	No
chrI	2240512	2240943	W03F11.4_2240512_2240943	-	-141.893	-0.329218	No
chrI	2241083	2241131	W03F11.4_2241083_2241131	-	-9.041	-0.188354	No
chrI	2241172	2241305	W03F11.4_2241172_2241305	-	-23.286	-0.175083	No
chrI	2242365	2243404	F12B6.3_2242365_2243404	+	-280.511	-0.269982	No
chrI	2243594	2244086	F12B6.3_2243594_2244086	+	-140.858	-0.286297	No
chrI	2244206	2244359	F12B6.3_2244206_2244359	+	-36.88	-0.241046	No
chrI	2244560	2244777	F12B6.3_2244560_2244777	+	-31.967	-0.147313	No
chrI	2244858	2245527	F12B6.3_2244858_2245527	+	-217.272	-0.324771	No
chrI	2245647	2246141	F12B6.3_2245647_2246141	+	-131.211	-0.265609	No
chrI	2246575	2247153	F12B6.3_2246575_2247153	+	-232.743	-0.40267	No
chrI	2250213	2250272	F12B6.2_2250213_2250272	+	-17.731	-0.300525	YES
chrI	2250390	2250712	F12B6.2_2250390_2250712	+	-104.696	-0.325143	YES
chrI	2250838	2251468	F12B6.2_2250838_2251468	+	-254.172	-0.403448	YES
chrI	2251605	2252340	F12B6.2_2251605_2252340	+	-188.844	-0.256931	No
chrI	2252684	2252883	F12B6.2_2252684_2252883	+	-69.176	-0.347618	No
chrI	2253009	2253061	F12B6.2_2253009_2253061	+	-14.362	-0.276192	No
chrI	2253191	2253698	F12B6.2_2253191_2253698	+	-202.098	-0.398615	No
chrI	2253850	2253906	F12B6.2_2253850_2253906	+	-11.746	-0.20975	No
chrI	2254041	2254088	F12B6.2_2254041_2254088	+	-9.457	-0.201213	YES
chrI	2254176	2254411	F12B6.2_2254176_2254411	+	-90.563	-0.385374	No
chrI	2254584	2254696	F12B6.2_2254584_2254696	+	-31.632	-0.282429	No
chrI	2256330	2257053	F12B6.1_2256330_2257053	-	-242.21	-0.335007	No
chrI	2257572	2257620	F12B6.1_2257572_2257620	-	-4.574	-0.0952917	No
chrI	2257771	2258516	F12B6.1_2257771_2258516	-	-329.302	-0.442016	No
chrI	2258834	2258881	F12B6.1_2258834_2258881	-	-8.278	-0.176128	No
chrI	2259038	2259085	F12B6.1_2259038_2259085	-	-9.094	-0.193489	No
chrI	2259521	2260371	F12B6.1_2259521_2260371	-	-344.101	-0.404825	YES
chrI	2260631	2261077	F12B6.1_2260631_2261077	-	-226.556	-0.507973	YES
chrI	2261415	2261460	F12B6.1_2261415_2261460	-	-9.259	-0.205756	No
chrI	2261600	2261662	F12B6.1_2261600_2261662	-	-20.248	-0.326581	No
chrI	2261786	2262352	F12B6.1_2261786_2262352	-	-267.882	-0.47329	No
chrI	2262439	2262481	F12B6.1_2262439_2262481	-	-12.196	-0.290381	No
chrI	2262851	2264237	F12B6.1_2262851_2264237	-	-616.375	-0.444715	No
chrI	2264453	2264524	F12B6.1_2264453_2264524	-	-21.452	-0.302141	No
chrI	2264664	2264714	F12B6.1_2264664_2264714	-	-15.376	-0.30752	No
chrI	2264846	2265488	F12B6.1_2264846_2265488	-	-201.947	-0.314559	No
chrI	2265571	2265621	F12B6.1_2265571_2265621	-	-10.24	-0.2048	No
chrI	2265713	2265758	F12B6.1_2265713_2265758	-	-18.239	-0.405311	No
chrI	2266077	2266905	F12B6.1_2266077_2266905	-	-326.536	-0.394367	YES
chrI	2267048	2267096	F12B6.1_2267048_2267096	-	-15.633	-0.325688	No
chrI	2267283	2267330	F12B6.1_2267283_2267330	-	-2.341	-0.0498085	No
chrI	2267436	2267649	F12B6.1_2267436_2267649	-	-112.294	-0.527202	No
chrI	2267752	2267800	F12B6.1_2267752_2267800	-	-14.74	-0.307083	No
chrI	2267899	2268805	F12B6.1_2267899_2268805	-	-327.422	-0.361393	No
chrI	2268932	2268977	F12B6.1_2268932_2268977	-	-7.086	-0.157467	No
chrI	2269193	2269240	F12B6.1_2269193_2269240	-	-9.903	-0.210702	No
chrI	2269357	2270206	F12B6.1_2269357_2270206	-	-306.847	-0.361422	No
chrI	2270393	2270444	F12B6.1_2270393_2270444	-	-15.191	-0.297863	No
chrI	2270665	2271638	F12B6.1_2270665_2271638	-	-384.623	-0.395296	No
chrI	2272119	2272169	F12B6.1_2272119_2272169	-	-11.829	-0.23658	No
chrI	2272329	2272540	F12B6.1_2272329_2272540	-	-86.303	-0.409019	No
chrI	2272634	2272688	F12B6.1_2272634_2272688	-	-20.898	-0.387	No
chrI	2279917	2280388	Y39G10AL.1_2279917_2280388	+	-182.829	-0.388172	YES
chrI	2281121	2281506	Y39G10AL.3_2281121_2281506	-	-108.674	-0.28227	No
chrI	2281813	2284729	Y39G10AL.3_2281813_2284729	-	-1799.04	-0.616955	YES
chrI	2284802	2284860	Y39G10AL.3_2284802_2284860	-	-17.361	-0.299328	YES
chrI	2284982	2286071	Y39G10AL.3_2284982_2286071	-	-391.292	-0.359313	YES
chrI	2286182	2286232	Y39G10AL.3_2286182_2286232	-	-11.578	-0.23156	YES
chrI	2286340	2287564	Y39G10AL.3_2286340_2287564	-	-401.322	-0.327877	YES
chrI	2287744	2289487	Y39G10AL.3_2287744_2289487	-	-915.873	-0.525458	YES
chrI	2289589	2289644	Y39G10AL.3_2289589_2289644	-	-11.665	-0.212091	YES
chrI	2289755	2290953	Y39G10AL.3_2289755_2290953	-	-529.974	-0.442382	YES
chrI	2295213	2296231	Y39G10AR.11_2295213_2296231	+	-710.649	-0.698083	YES
chrI	2296646	2297035	Y39G10AR.11_2296646_2297035	+	-254.062	-0.653116	YES
chrI	2297921	2302827	Y39G10AR.12_2297921_2302827	-	-2071.23	-0.422183	YES
chrI	2300171	2300466	Y39G10AR.10_2300171_2300466	+	-127.836	-0.433342	YES
chrI	2300568	2300721	Y39G10AR.10_2300568_2300721	+	-37.808	-0.247111	YES
chrI	2302976	2303028	Y39G10AR.12_2302976_2303028	-	-11.629	-0.223635	No
chrI	2303115	2303161	Y39G10AR.12_2303115_2303161	-	-5.51	-0.119783	No
chrI	2304201	2304249	Y39G10AR.12_2304201_2304249	-	-8.378	-0.174542	No
chrI	2304846	2304900	Y39G10AR.13_2304846_2304900	-	-8.153	-0.150981	No
chrI	2305581	2305632	Y39G10AR.13_2305581_2305632	-	-9.748	-0.191137	YES
chrI	2306421	2306471	Y39G10AR.13_2306421_2306471	-	-7.635	-0.1527	No
chrI	2306657	2306704	Y39G10AR.13_2306657_2306704	-	-8.668	-0.184426	No
chrI	2307040	2307405	Y39G10AR.9_2307040_2307405	+	-108.156	-0.296318	YES
chrI	2307494	2307537	Y39G10AR.9_2307494_2307537	+	-7.419	-0.172535	No
chrI	2307892	2307963	Y39G10AR.9_2307892_2307963	+	-19.189	-0.270268	No
chrI	2308543	2308596	Y39G10AR.9_2308543_2308596	+	-8.645	-0.163113	No
chrI	2309211	2309518	Y39G10AR.21_2309211_2309518	+	-82.495	-0.268713	YES
chrI	2309678	2309727	Y39G10AR.21_2309678_2309727	+	-10.453	-0.213327	No
chrI	2310249	2310855	Y39G10AR.21_2310249_2310855	+	-172.643	-0.284889	YES
chrI	2311058	2311100	Y39G10AR.21_2311058_2311100	+	-5.474	-0.130333	YES
chrI	2311176	2311843	Y39G10AR.21_2311176_2311843	+	-215.062	-0.322432	YES
chrI	2312700	2312751	Y39G10AR.20_2312700_2312751	+	-10.327	-0.20249	YES
chrI	2313322	2313376	Y39G10AR.8_2313322_2313376	+	-9.381	-0.173722	No
chrI	2313465	2313509	Y39G10AR.8_2313465_2313509	+	-14.415	-0.327614	YES
chrI	2313715	2313772	Y39G10AR.8_2313715_2313772	+	-9.537	-0.167316	YES
chrI	2314163	2314997	Y39G10AR.8_2314163_2314997	+	-625.364	-0.749837	YES
chrI	2315606	2315657	Y39G10AR.8_2315606_2315657	+	-6.721	-0.131784	YES
chrI	2316391	2316447	Y39G10AR.7_2316391_2316447	+	-8.137	-0.145304	YES
chrI	2316589	2316648	Y39G10AR.7_2316589_2316648	+	-16.75	-0.283898	No
chrI	2317171	2317216	Y39G10AR.7_2317171_2317216	+	-7.515	-0.167	No
chrI	2317345	2317393	Y39G10AR.7_2317345_2317393	+	-9.271	-0.193146	No
chrI	2318732	2319071	Y39G10AR.14_2318732_2319071	-	-163.076	-0.48105	YES
chrI	2319285	2319334	Y39G10AR.14_2319285_2319334	-	-10.176	-0.207673	No
chrI	2320703	2321054	Y39G10AR.14_2320703_2321054	-	-120.069	-0.342077	YES
chrI	2321283	2321329	Y39G10AR.14_2321283_2321329	-	-8.935	-0.194239	YES
chrI	2321555	2321625	Y39G10AR.14_2321555_2321625	-	-21.53	-0.307571	No
chrI	2321682	2321739	Y39G10AR.14_2321682_2321739	-	-11.605	-0.203596	No
chrI	2322215	2322259	Y39G10AR.15_2322215_2322259	-	-6.188	-0.140636	No
chrI	2322407	2322449	Y39G10AR.15_2322407_2322449	-	0.072	0.00171429	No
chrI	2322567	2324205	Y39G10AR.15_2322567_2324205	-	-807.625	-0.493056	YES
chrI	2324270	2324324	Y39G10AR.15_2324270_2324324	-	-11.922	-0.220778	No
chrI	2324464	2325336	Y39G10AR.15_2324464_2325336	-	-366.175	-0.419925	No
chrI	2325805	2325858	Y39G10AR.15_2325805_2325858	-	-11.919	-0.224887	No
chrI	2326184	2326227	Y39G10AR.15_2326184_2326227	-	-9.843	-0.228907	No
chrI	2326587	2326852	Y39G10AR.15_2326587_2326852	-	-97.754	-0.368883	No
chrI	2327147	2327198	Y39G10AR.15_2327147_2327198	-	-7.217	-0.14151	No
chrI	2328168	2328935	Y39G10AR.22_2328168_2328935	+	-261.053	-0.340356	No
chrI	2329393	2329922	Y39G10AR.22_2329393_2329922	+	-264.172	-0.49938	No
chrI	2331290	2331339	Y39G10AR.16_2331290_2331339	-	-14.229	-0.290388	No
chrI	2331465	2331510	Y39G10AR.16_2331465_2331510	-	-15.053	-0.334511	No
chrI	2331698	2332559	Y39G10AR.16_2331698_2332559	-	-407.985	-0.47385	No
chrI	2333487	2333767	Y39G10AR.6_2333487_2333767	+	-84.239	-0.300854	No
chrI	2333848	2333899	Y39G10AR.6_2333848_2333899	+	-10.231	-0.200608	No
chrI	2333995	2334161	Y39G10AR.6_2333995_2334161	+	-68.574	-0.413096	No
chrI	2334294	2334641	Y39G10AR.6_2334294_2334641	+	-138.074	-0.397908	No
chrI	2334793	2335420	Y39G10AR.6_2334793_2335420	+	-200.742	-0.320163	No
chrI	2335767	2337184	Y39G10AR.6_2335767_2337184	+	-459.057	-0.323964	No
chrI	2337544	2338365	Y39G10AR.6_2337544_2338365	+	-253.776	-0.309106	No
chrI	2342409	2342521	Y39G10AR.5_2342409_2342521	+	-34.027	-0.303812	No
chrI	2342707	2344101	Y39G10AR.5_2342707_2344101	+	-623.713	-0.447427	YES
chrI	2344263	2345099	Y39G10AR.5_2344263_2345099	+	-588.006	-0.703356	YES
chrI	2345225	2345269	Y39G10AR.5_2345225_2345269	+	-10.192	-0.231636	No
chrI	2345386	2346369	Y39G10AR.5_2345386_2346369	+	-296.488	-0.301615	No
chrI	2346471	2346550	Y39G10AR.5_2346471_2346550	+	-13.356	-0.169063	No
chrI	2346718	2346765	Y39G10AR.5_2346718_2346765	+	-12.547	-0.266957	YES
chrI	2346893	2347479	Y39G10AR.5_2346893_2347479	+	-196.201	-0.334814	No
chrI	2347745	2347792	Y39G10AR.5_2347745_2347792	+	-8.307	-0.176745	No
chrI	2347947	2347993	Y39G10AR.5_2347947_2347993	+	-9.719	-0.211283	No
chrI	2348306	2349050	Y39G10AR.5_2348306_2349050	+	-343.711	-0.461977	YES
chrI	2349653	2350067	Y39G10AR.5_2349653_2350067	+	-211.485	-0.510833	YES
chrI	2352885	2354531	Y39G10AR.25_2352885_2354531	+	-569.48	-0.345978	No
chrI	2354618	2354668	Y39G10AR.25_2354618_2354668	+	-11.735	-0.2347	No
chrI	2354782	2355575	Y39G10AR.25_2354782_2355575	+	-297.878	-0.375634	No
chrI	2355704	2355972	Y39G10AR.25_2355704_2355972	+	-107.134	-0.399754	No
chrI	2357996	2358419	Y39G10AR.3_2357996_2358419	+	-96.409	-0.227917	No
chrI	2358682	2358894	Y39G10AR.3_2358682_2358894	+	-69.108	-0.325981	No
chrI	2358950	2360070	Y39G10AR.3_2358950_2360070	+	-411.199	-0.367142	No
chrI	2360177	2360224	Y39G10AR.3_2360177_2360224	+	-21.116	-0.449277	No
chrI	2360340	2361567	Y39G10AR.3_2360340_2361567	+	-554.41	-0.451842	No
chrI	2361791	2362714	Y39G10AR.3_2361791_2362714	+	-357.022	-0.386806	No
chrI	2362991	2363510	Y39G10AR.3_2362991_2363510	+	-201.094	-0.387464	No
chrI	2363621	2364257	Y39G10AR.3_2363621_2364257	+	-168.299	-0.264621	No
chrI	2364404	2364455	Y39G10AR.3_2364404_2364455	+	-11.228	-0.220157	No
chrI	2364562	2364616	Y39G10AR.3_2364562_2364616	+	-16.924	-0.313407	No
chrI	2364688	2365102	Y39G10AR.3_2364688_2365102	+	-120.729	-0.291616	No
chrI	2365216	2368921	Y39G10AR.3_2365216_2368921	+	-1614.74	-0.435827	No
chrI	2369264	2369383	Y39G10AR.3_2369264_2369383	+	-46.296	-0.389042	No
chrI	2369474	2369522	Y39G10AR.3_2369474_2369522	+	-12.85	-0.267708	No
chrI	2369653	2369972	Y39G10AR.3_2369653_2369972	+	-100.468	-0.314947	No
chrI	2370172	2371098	Y39G10AR.3_2370172_2371098	+	-313.072	-0.338091	No
chrI	2371197	2371248	Y39G10AR.3_2371197_2371248	+	-8.704	-0.170667	No
chrI	2371419	2372675	Y39G10AR.3_2371419_2372675	+	-553.909	-0.44101	No
chrI	2377584	2377636	Y39G10AR.17_2377584_2377636	-	-12.946	-0.248962	No
chrI	2377778	2379394	Y39G10AR.17_2377778_2379394	-	-652.475	-0.403759	YES
chrI	2379509	2379560	Y39G10AR.17_2379509_2379560	-	-12.153	-0.238294	No
chrI	2379707	2381014	Y39G10AR.17_2379707_2381014	-	-474.069	-0.362715	No
chrI	2383110	2383202	Y39G10AR.18_2383110_2383202	-	-30.558	-0.332152	YES
chrI	2383446	2384586	Y39G10AR.18_2383446_2384586	-	-531.089	-0.465868	YES
chrI	2384993	2388158	Y39G10AR.18_2384993_2388158	-	-1658.11	-0.523889	YES
chrI	2388780	2389884	Y39G10AR.18_2388780_2389884	-	-572.995	-0.519017	YES
chrI	2389961	2390885	Y39G10AR.18_2389961_2390885	-	-654.546	-0.708383	YES
chrI	2391162	2392473	Y39G10AR.18_2391162_2392473	-	-590.559	-0.450465	YES
chrI	2392710	2393210	Y39G10AR.18_2392710_2393210	-	-150.753	-0.301506	YES
chrI	2396252	2396307	Y39G10AR.18_2396252_2396307	-	-19.154	-0.348255	No
chrI	2396414	2397637	Y39G10AR.18_2396414_2397637	-	-340.235	-0.278197	No
chrI	2397681	2397730	Y39G10AR.18_2397681_2397730	-	-14.609	-0.298143	No
chrI	2397937	2399183	Y39G10AR.18_2397937_2399183	-	-578.754	-0.46449	YES
chrI	2399392	2400617	Y39G10AR.18_2399392_2400617	-	-324.248	-0.264692	No
chrI	2400770	2401010	Y39G10AR.18_2400770_2401010	-	-87.049	-0.362704	No
chrI	2401140	2401211	Y39G10AR.18_2401140_2401211	-	-18.356	-0.258535	No
chrI	2401410	2401459	Y39G10AR.18_2401410_2401459	-	-3.808	-0.0777143	No
chrI	2402326	2403017	Y39G10AR.2_2402326_2403017	+	-498.621	-0.721593	YES
chrI	2403297	2403346	Y39G10AR.2_2403297_2403346	+	-10.899	-0.222429	YES
chrI	2403440	2404646	Y39G10AR.2_2403440_2404646	+	-705.454	-0.584954	YES
chrI	2404971	2406328	Y39G10AR.2_2404971_2406328	+	-451.507	-0.332724	YES
chrI	2406600	2407817	Y39G10AR.2_2406600_2407817	+	-1027.74	-0.844486	YES
chrI	2408078	2409283	Y39G10AR.2_2408078_2409283	+	-909.386	-0.754677	YES
chrI	2415281	2415843	F23C8.13_2415281_2415843	+	-269.631	-0.47977	YES
chrI	2415951	2417183	F23C8.13_2415951_2417183	+	-580.503	-0.471187	YES
chrI	2417576	2418372	F23C8.13_2417576_2418372	+	-385.594	-0.484415	No
chrI	2418850	2419572	F23C8.5_2418850_2419572	-	-478.053	-0.662123	YES
chrI	2420040	2420300	F23C8.5_2420040_2420300	-	-111.179	-0.427612	YES
chrI	2421440	2421500	F23C8.6_2421440_2421500	-	-11.456	-0.190933	No
chrI	2421607	2421665	F23C8.6_2421607_2421665	-	-11.93	-0.20569	YES
chrI	2422601	2422651	F23C8.7_2422601_2422651	-	-12.672	-0.25344	No
chrI	2422797	2422844	F23C8.7_2422797_2422844	-	-6.023	-0.128149	No
chrI	2423223	2423933	F23C8.7_2423223_2423933	-	-439.378	-0.618842	No
chrI	2424287	2424819	F23C8.7_2424287_2424819	-	-269.219	-0.506051	No
chrI	2424933	2425009	F23C8.7_2424933_2425009	-	-31.143	-0.409776	No
chrI	2429824	2429952	F23C8.8_2429824_2429952	-	-44.647	-0.348805	No
chrI	2430138	2431416	F23C8.8_2430138_2431416	-	-494.816	-0.38718	No
chrI	2431723	2431805	F23C8.9_2431723_2431805	-	-25.422	-0.310024	No
chrI	2432115	2432536	F23C8.8_2432115_2432536	-	-167.776	-0.398518	No
chrI	2432899	2432955	F23C8.9_2432899_2432955	-	-8.726	-0.155821	No
chrI	2433217	2433260	F23C8.9_2433217_2433260	-	-7.994	-0.185907	No
chrI	2433365	2433413	F23C8.9_2433365_2433413	-	-6.331	-0.131896	No
chrI	2433481	2433532	F23C8.9_2433481_2433532	-	-8.027	-0.157392	No
chrI	2434224	2434281	F23C8.4_2434224_2434281	+	-5.125	-0.0899123	No
chrI	2434554	2434606	F23C8.4_2434554_2434606	+	-7.423	-0.14275	No
chrI	2434853	2434894	F23C8.4_2434853_2434894	+	-5.534	-0.134976	No
chrI	2435018	2435533	F23C8.4_2435018_2435533	+	-183.782	-0.356858	YES
chrI	2438924	2439584	F23C8.3_2438924_2439584	+	-193.308	-0.292891	No
chrI	2439822	2442668	F23C8.3_2439822_2442668	+	-1133.4	-0.398243	YES
chrI	2440783	2441002	F23C8.10_2440783_2441002	-	-116.86	-0.533607	No
chrI	2445820	2445880	F23C8.2_2445820_2445880	+	-11.726	-0.195433	No
chrI	2446828	2446874	F23C8.1_2446828_2446874	+	-9.545	-0.2075	No
chrI	2447023	2447151	F23C8.1_2447023_2447151	+	-30.597	-0.239039	No
chrI	2447481	2447586	F23C8.1_2447481_2447586	+	-27.635	-0.26319	No
chrI	2447794	2447837	F23C8.1_2447794_2447837	+	-11.278	-0.262279	No
chrI	2447999	2448048	F23C8.1_2447999_2448048	+	-11.557	-0.235857	No
chrI	2449593	2449643	F23C8.11_2449593_2449643	-	-14.375	-0.2875	No
chrI	2449757	2449813	F23C8.11_2449757_2449813	-	-15.385	-0.274732	No
chrI	2449886	2449930	F23C8.11_2449886_2449930	-	-9.029	-0.205205	No
chrI	2450042	2450140	F23C8.11_2450042_2450140	-	-30.296	-0.309143	No
chrI	2450429	2450475	F23C8.11_2450429_2450475	-	-9.164	-0.199217	No
chrI	2450576	2450620	F23C8.11_2450576_2450620	-	-1.912	-0.0434545	No
chrI	2451237	2451289	F23C8.12_2451237_2451289	-	-10.376	-0.199538	No
chrI	2451368	2451731	F23C8.12_2451368_2451731	-	-100.991	-0.278212	No
chrI	2452179	2452943	T16H5.1_2452179_2452943	-	-393.897	-0.515572	No
chrI	2453354	2454659	T16H5.1_2453354_2454659	-	-579.319	-0.443923	No
chrI	2454896	2455020	T16H5.1_2454896_2455020	-	-47.428	-0.382484	No
chrI	2455094	2456055	T16H5.1_2455094_2456055	-	-352.685	-0.366998	No
chrI	2456472	2464541	T16H5.1_2456472_2464541	-	-3191.98	-0.395586	YES
chrI	2469169	2470852	Y74C10AL.2_2469169_2470852	-	-537.244	-0.319218	YES
chrI	2471064	2471870	Y74C10AL.2_2471064_2471870	-	-227.636	-0.282427	No
chrI	2471994	2472276	Y74C10AL.2_2471994_2472276	-	-60.849	-0.215777	YES
chrI	2472506	2473312	Y74C10AR.3_2472506_2473312	-	-237.712	-0.294928	YES
chrI	2473663	2475011	Y74C10AR.3_2473663_2475011	-	-870.955	-0.646109	YES
chrI	2475640	2478229	Y74C10AR.3_2475640_2478229	-	-1030.24	-0.39793	YES
chrI	2478802	2480305	Y74C10AR.3_2478802_2480305	-	-614.014	-0.408526	YES
chrI	2480570	2482349	Y74C10AR.3_2480570_2482349	-	-963.701	-0.541709	YES
chrI	2482421	2485199	Y74C10AR.3_2482421_2485199	-	-1028.55	-0.370248	YES
chrI	2482698	2483166	Y74C10AR.2_2482698_2483166	+	-147.775	-0.315759	No
chrI	2485277	2485324	Y74C10AR.3_2485277_2485324	-	-9.02	-0.191915	YES
chrI	2486006	2486809	Y74C10AR.1_2486006_2486809	+	-604.064	-0.752259	YES
chrI	2487243	2488213	Y74C10AR.1_2487243_2488213	+	-421.093	-0.434116	YES
chrI	2488568	2489442	Y74C10AR.1_2488568_2489442	+	-701.017	-0.802079	YES
chrI	2490192	2490238	Y23H5B.6_2490192_2490238	+	-8.154	-0.177261	No
chrI	2490859	2492609	Y23H5B.6_2490859_2492609	+	-824.894	-0.471368	YES
chrI	2492969	2494937	Y23H5B.6_2492969_2494937	+	-962.036	-0.488839	YES
chrI	2495354	2496669	Y23H5B.6_2495354_2496669	+	-1161.29	-0.88311	YES
chrI	2498429	2499973	Y23H5B.5_2498429_2499973	+	-708.643	-0.458966	YES
chrI	2500409	2501980	Y23H5B.5_2500409_2501980	+	-715.714	-0.455579	YES
chrI	2502456	2504021	Y23H5B.5_2502456_2504021	+	-511.549	-0.326868	YES
chrI	2504142	2504370	Y23H5B.5_2504142_2504370	+	-67.111	-0.294346	No
chrI	2504441	2505394	Y23H5B.5_2504441_2505394	+	-281.735	-0.29563	No
chrI	2507027	2511007	Y23H5B.7_2507027_2511007	-	-1571.44	-0.394834	No
chrI	2511279	2511559	Y23H5B.7_2511279_2511559	-	-85.541	-0.305504	No
chrI	2511735	2511786	Y23H5B.7_2511735_2511786	-	-13.78	-0.270196	No
chrI	2511917	2511963	Y23H5B.7_2511917_2511963	-	-11.211	-0.243717	No
chrI	2512063	2513539	Y23H5B.7_2512063_2513539	-	-753.744	-0.510667	No
chrI	2513616	2513664	Y23H5B.7_2513616_2513664	-	-14.948	-0.311417	No
chrI	2533352	2537812	Y23H5B.4_2533352_2537812	+	-1608.14	-0.36057	YES
chrI	2538141	2538769	Y23H5B.4_2538141_2538769	+	-263.982	-0.420354	No
chrI	2539062	2540410	Y23H5B.4_2539062_2540410	+	-404.64	-0.300178	No
chrI	2540747	2541581	Y23H5B.4_2540747_2541581	+	-220.682	-0.264607	No
chrI	2541669	2541733	Y23H5B.4_2541669_2541733	+	-22.65	-0.353906	No
chrI	2544969	2545636	Y23H5B.3_2544969_2545636	+	-242.632	-0.363766	No
chrI	2545762	2545808	Y23H5B.3_2545762_2545808	+	-7.671	-0.166761	No
chrI	2545865	2545942	Y23H5B.3_2545865_2545942	+	-21.544	-0.279792	No
chrI	2547156	2547205	Y23H5B.8_2547156_2547205	-	-6.861	-0.14002	No
chrI	2547334	2548122	Y23H5B.8_2547334_2548122	-	-311.143	-0.394852	No
chrI	2549340	2549775	Y23H5B.2_2549340_2549775	+	-178.937	-0.411349	No
chrI	2549963	2550011	Y23H5B.2_2549963_2550011	+	-16.173	-0.336938	No
chrI	2553437	2555148	Y23H5B.1_2553437_2555148	+	-619.385	-0.362002	No
chrI	2556390	2556441	Y23H5B.12_2556390_2556441	+	-12.045	-0.236176	No
chrI	2556532	2556601	Y23H5B.12_2556532_2556601	+	-26.372	-0.382203	No
chrI	2556772	2556829	Y23H5B.12_2556772_2556829	+	-10.281	-0.180368	No
chrI	2557017	2557174	Y23H5B.12_2557017_2557174	+	-64.331	-0.409752	No
chrI	2558327	2558638	C55C2.4_2558327_2558638	+	-92.694	-0.298051	No
chrI	2558729	2558775	C55C2.4_2558729_2558775	+	-6.857	-0.149065	No
chrI	2558946	2559644	C55C2.4_2558946_2559644	+	-311.505	-0.446282	No
chrI	2559772	2559820	C55C2.4_2559772_2559820	+	-6.146	-0.128042	No
chrI	2560538	2560889	C55C2.3_2560538_2560889	+	-102.91	-0.293191	No
chrI	2560980	2561026	C55C2.3_2560980_2561026	+	-7.792	-0.169391	No
chrI	2561197	2561349	C55C2.3_2561197_2561349	+	-41.042	-0.270013	No
chrI	2561480	2561527	C55C2.3_2561480_2561527	+	-5.199	-0.110617	No
chrI	2568785	2568863	C55C2.1_2568785_2568863	+	-22.018	-0.282282	No
chrI	2568960	2569685	C55C2.1_2568960_2569685	+	-254.838	-0.351501	No
chrI	2569723	2570073	C55C2.1_2569723_2570073	+	-87.058	-0.248737	No
chrI	2570168	2570458	C55C2.1_2570168_2570458	+	-97.498	-0.3362	No
chrI	2570598	2570647	C55C2.1_2570598_2570647	+	-5.17	-0.10551	No
chrI	2572041	2572090	C55C2.5_2572041_2572090	-	-10.673	-0.217816	No
chrI	2572302	2572357	C55C2.5_2572302_2572357	-	-7.936	-0.144291	No
chrI	2572521	2572571	C55C2.5_2572521_2572571	-	-10.742	-0.21484	No
chrI	2572738	2573742	C55C2.5_2572738_2573742	-	-437.998	-0.436253	No
chrI	2573943	2574000	C55C2.5_2573943_2574000	-	-4.411	-0.077386	YES
chrI	2574269	2574314	C55C2.5_2574269_2574314	-	-9.07	-0.201556	No
chrI	2574446	2574522	C55C2.5_2574446_2574522	-	-5.24	-0.0689474	No
chrI	2574586	2575440	C55C2.5_2574586_2575440	-	-339.558	-0.397609	YES
chrI	2575631	2575842	C55C2.5_2575631_2575842	-	-55.303	-0.2621	No
chrI	2581288	2582567	K07A3.1_2581288_2582567	-	-587.35	-0.459226	YES
chrI	2582930	2583982	K07A3.1_2582930_2583982	-	-281.047	-0.267155	YES
chrI	2584379	2585942	K07A3.1_2584379_2585942	-	-830.282	-0.53121	YES
chrI	2587838	2589012	K07A3.2_2587838_2589012	-	-499.558	-0.425518	YES
chrI	2589269	2589450	K07A3.2_2589269_2589450	-	-67.748	-0.374298	YES
chrI	2589638	2589690	K07A3.2_2589638_2589690	-	-14.236	-0.273769	No
chrI	2589810	2590536	K07A3.2_2589810_2590536	-	-257.596	-0.354815	No
chrI	2590952	2591002	K07A3.2_2590952_2591002	-	-11.252	-0.22504	No
chrI	2591146	2591888	K07A3.2_2591146_2591888	-	-312.095	-0.420613	YES
chrI	2592389	2592433	K07A3.2_2592389_2592433	-	-7.887	-0.17925	No
chrI	2592617	2593496	K07A3.2_2592617_2593496	-	-374.369	-0.425903	YES
chrI	2593771	2593835	K07A3.2_2593771_2593835	-	-14.89	-0.232656	No
chrI	2594066	2594283	K07A3.2_2594066_2594283	-	-74.975	-0.345507	No
chrI	2594344	2594388	K07A3.2_2594344_2594388	-	-9.308	-0.211545	No
chrI	2594533	2595201	K07A3.2_2594533_2595201	-	-159.824	-0.239257	No
chrI	2600036	2600081	K07A3.3_2600036_2600081	+	-7.232	-0.160711	No
chrI	2600142	2600192	K07A3.3_2600142_2600192	+	-11.732	-0.23464	No
chrI	2600390	2600516	K07A3.3_2600390_2600516	+	-55.473	-0.440262	No
chrI	2600634	2600998	K07A3.3_2600634_2600998	+	-168.091	-0.461788	No
chrI	2601428	2601604	K07A3.3_2601428_2601604	+	-79.726	-0.452989	No
chrI	2601785	2601973	K07A3.3_2601785_2601973	+	-65.72	-0.349574	No
chrI	2602117	2602165	K07A3.3_2602117_2602165	+	-8.273	-0.172354	No
chrI	2602393	2602478	K07A3.3_2602393_2602478	+	-35.666	-0.4196	No
chrI	2606934	2607213	Y23H5A.5_2606934_2607213	+	-85.637	-0.306943	YES
chrI	2607297	2608189	Y23H5A.5_2607297_2608189	+	-351.525	-0.394086	YES
chrI	2608310	2608862	Y23H5A.5_2608310_2608862	+	-188.622	-0.341707	No
chrI	2609029	2609890	Y23H5A.5_2609029_2609890	+	-202.206	-0.23485	No
chrI	2610310	2611372	Y23H5A.5_2610310_2611372	+	-482.499	-0.454331	YES
chrI	2611810	2611864	Y23H5A.5_2611810_2611864	+	-13.464	-0.249333	No
chrI	2611957	2612004	Y23H5A.5_2611957_2612004	+	-13.784	-0.293277	No
chrI	2612097	2612789	Y23H5A.5_2612097_2612789	+	-303.78	-0.438988	YES
chrI	2612888	2613335	Y23H5A.5_2612888_2613335	+	-152.43	-0.341007	YES
chrI	2613386	2614020	Y23H5A.5_2613386_2614020	+	-239.668	-0.378025	YES
chrI	2614491	2615078	Y23H5A.5_2614491_2615078	+	-195.67	-0.333339	YES
chrI	2615130	2615849	Y23H5A.5_2615130_2615849	+	-287.461	-0.399807	YES
chrI	2615939	2616004	Y23H5A.5_2615939_2616004	+	-14.373	-0.221123	No
chrI	2616080	2617092	Y23H5A.5_2616080_2617092	+	-524.803	-0.51858	YES
chrI	2617607	2617656	Y23H5A.4_2617607_2617656	+	-17.627	-0.359735	No
chrI	2617847	2617890	Y23H5A.4_2617847_2617890	+	-7.459	-0.173465	No
chrI	2617977	2618635	Y23H5A.4_2617977_2618635	+	-405.732	-0.616614	No
chrI	2619208	2620058	Y23H5A.4_2619208_2620058	+	-440.998	-0.518821	No
chrI	2620193	2620240	Y23H5A.4_2620193_2620240	+	-7.935	-0.16883	No
chrI	2620825	2620872	Y23H5A.3_2620825_2620872	+	-9.338	-0.198681	YES
chrI	2620950	2620996	Y23H5A.3_2620950_2620996	+	-7.281	-0.158283	YES
chrI	2621226	2621285	Y23H5A.3_2621226_2621285	+	-11.201	-0.189847	No
chrI	2622016	2622319	Y23H5A.2_2622016_2622319	+	-95.312	-0.314561	YES
chrI	2622631	2622894	Y23H5A.2_2622631_2622894	+	-114.968	-0.437141	No
chrI	2623180	2623262	Y23H5A.2_2623180_2623262	+	-17.195	-0.209695	No
chrI	2623430	2623645	Y23H5A.7_2623430_2623645	-	-100.609	-0.467949	YES
chrI	2623957	2624016	Y23H5A.7_2623957_2624016	-	-9.103	-0.154288	YES
chrI	2624545	2625328	Y23H5A.7_2624545_2625328	-	-349.557	-0.446433	YES
chrI	2626027	2626522	Y23H5A.7_2626027_2626522	-	-174.238	-0.351996	No
chrI	2627031	2627076	Y23H5A.7_2627031_2627076	-	-13.021	-0.289356	YES
chrI	2627198	2628092	Y23H5A.7_2627198_2628092	-	-543.549	-0.607997	YES
chrI	2629904	2629949	Y23H5A.1_2629904_2629949	+	-10.513	-0.233622	No
chrI	2630079	2630127	Y23H5A.1_2630079_2630127	+	-13.758	-0.286625	No
chrI	2630271	2630326	Y23H5A.1_2630271_2630326	+	-6.325	-0.115	No
chrI	2630646	2631039	Y23H5A.1_2630646_2631039	+	-122.981	-0.312929	No
chrI	2631164	2631209	Y23H5A.1_2631164_2631209	+	-9.657	-0.2146	No
chrI	2631617	2631667	Y23H5A.1_2631617_2631667	+	-10.776	-0.21552	No
chrI	2631785	2632041	Y23H5A.1_2631785_2632041	+	-83.051	-0.324418	No
chrI	2633190	2633686	Y23H5A.8_2633190_2633686	+	-174.169	-0.351147	No
chrI	2633968	2634339	Y23H5A.8_2633968_2634339	+	-111.162	-0.299628	No
chrI	2634404	2634448	Y23H5A.8_2634404_2634448	+	-7.953	-0.18075	No
chrI	2636987	2637194	F40E3.7_2636987_2637194	+	-70.372	-0.339961	No
chrI	2637407	2637456	F40E3.7_2637407_2637456	+	-3.421	-0.0698163	No
chrI	2638701	2638754	F40E3.3_2638701_2638754	+	-12.427	-0.234472	No
chrI	2638839	2638907	F40E3.3_2638839_2638907	+	-14.042	-0.2065	No
chrI	2639006	2639059	F40E3.3_2639006_2639059	+	-10.306	-0.194453	No
chrI	2639142	2639207	F40E3.3_2639142_2639207	+	-11.91	-0.183231	No
chrI	2642783	2642828	F40E3.2_2642783_2642828	+	-8.054	-0.178978	YES
chrI	2642876	2642924	F40E3.2_2642876_2642924	+	-11.34	-0.23625	No
chrI	2643068	2643129	F40E3.2_2643068_2643129	+	-5.987	-0.0981475	No
chrI	2643315	2643363	F40E3.2_2643315_2643363	+	-11.821	-0.246271	No
chrI	2645400	2645484	F40E3.5_2645400_2645484	-	-30.458	-0.362595	No
chrI	2645661	2646439	F40E3.5_2645661_2646439	-	-348.727	-0.448235	No
chrI	2647125	2647958	F40E3.5_2647125_2647958	-	-347.501	-0.417168	No
chrI	2650815	2650861	F40E3.6_2650815_2650861	-	-4.753	-0.103326	No
chrI	2651020	2651081	F40E3.6_2651020_2651081	-	-22.357	-0.366508	No
chrI	2651139	2651187	F40E3.6_2651139_2651187	-	-11.426	-0.238042	No
chrI	2651449	2651492	F40E3.6_2651449_2651492	-	-10.754	-0.250093	No
chrI	2668250	2668409	F32B5.6_2668250_2668409	+	-51.817	-0.325893	YES
chrI	2668528	2668794	F32B5.6_2668528_2668794	+	-60.747	-0.228372	YES
chrI	2669213	2669632	F32B5.6_2669213_2669632	+	-199.779	-0.4768	YES
chrI	2669749	2670050	F32B5.6_2669749_2670050	+	-100.732	-0.334658	YES
chrI	2670200	2670248	F32B5.6_2670200_2670248	+	-7.074	-0.147375	YES
chrI	2670430	2670484	F32B5.6_2670430_2670484	+	-14.599	-0.270352	YES
chrI	2670604	2671913	F32B5.6_2670604_2671913	+	-467.356	-0.357033	YES
chrI	2673062	2673200	F32B5.7_2673062_2673200	-	-14.422	-0.104507	YES
chrI	2673392	2674220	F32B5.7_2673392_2674220	-	-244.035	-0.294728	No
chrI	2674466	2674644	F32B5.7_2674466_2674644	-	-48.03	-0.269831	YES
chrI	2674888	2675237	F32B5.7_2674888_2675237	-	-117.18	-0.335759	No
chrI	2675412	2675941	F32B5.7_2675412_2675941	-	-160.814	-0.303996	No
chrI	2676750	2677913	F32B5.7_2676750_2677913	-	-493.71	-0.424514	YES
chrI	2678057	2679057	F32B5.7_2678057_2679057	-	-332.419	-0.332419	No
chrI	2679208	2679262	F32B5.7_2679208_2679262	-	-10.508	-0.194593	No
chrI	2679330	2679802	F32B5.7_2679330_2679802	-	-177.103	-0.375218	YES
chrI	2679892	2680556	F32B5.7_2679892_2680556	-	-200.342	-0.30172	No
chrI	2680667	2682535	F32B5.7_2680667_2682535	-	-707.024	-0.378493	YES
chrI	2687121	2687691	F32B5.8_2687121_2687691	-	-206.161	-0.361686	YES
chrI	2687895	2687951	F32B5.8_2687895_2687951	-	-11.052	-0.197357	No
chrI	2687975	2689087	F32B5.8_2687975_2689087	-	-450.918	-0.405502	YES
chrI	2689212	2689271	F32B5.8_2689212_2689271	-	-15.493	-0.262593	YES
chrI	2692826	2692874	F32B5.3_2692826_2692874	+	-7.03	-0.146458	No
chrI	2692995	2693043	F32B5.3_2692995_2693043	+	-9.372	-0.19525	No
chrI	2693130	2693176	F32B5.3_2693130_2693176	+	-9.801	-0.213065	No
chrI	2693293	2693353	F32B5.3_2693293_2693353	+	-9.739	-0.162317	No
chrI	2693643	2693728	F32B5.3_2693643_2693728	+	-22.96	-0.270118	No
chrI	2697582	2697626	F32B5.2_2697582_2697626	+	-10.195	-0.231705	No
chrI	2697682	2698042	F32B5.2_2697682_2698042	+	-101.221	-0.281169	No
chrI	2698331	2698835	F32B5.2_2698331_2698835	+	-216.273	-0.429113	No
chrI	2698929	2698977	F32B5.2_2698929_2698977	+	-10.626	-0.221375	No
chrI	2699089	2699552	F32B5.2_2699089_2699552	+	-150.438	-0.32492	No
chrI	2699760	2699813	F32B5.2_2699760_2699813	+	-10.374	-0.195736	No
chrI	2700604	2700885	F32B5.1_2700604_2700885	+	-101.729	-0.362025	No
chrI	2701683	2701731	F32B5.1_2701683_2701731	+	-12.748	-0.265583	No
chrI	2701944	2701994	F32B5.1_2701944_2701994	+	-10.222	-0.20444	No
chrI	2707181	2707600	Y71F9B.5_2707181_2707600	+	-113.516	-0.270921	No
chrI	2707696	2708103	Y71F9B.5_2707696_2708103	+	-137.237	-0.337192	YES
chrI	2708208	2709921	Y71F9B.5_2708208_2709921	+	-629.395	-0.367423	YES
chrI	2710068	2711122	Y71F9B.5_2710068_2711122	+	-360.002	-0.341558	YES
chrI	2711407	2712440	Y71F9B.5_2711407_2712440	+	-408.605	-0.395552	YES
chrI	2712550	2713852	Y71F9B.5_2712550_2713852	+	-457.525	-0.351402	YES
chrI	2714074	2714121	Y71F9B.5_2714074_2714121	+	-14.204	-0.302213	No
chrI	2714410	2714729	Y71F9B.5_2714410_2714729	+	-92.097	-0.288705	No
chrI	2715056	2717231	Y71F9B.5_2715056_2717231	+	-1409.29	-0.647949	YES
chrI	2718331	2719105	Y71F9B.16_2718331_2719105	-	-218.118	-0.281806	No
chrI	2719269	2720671	Y71F9B.16_2719269_2720671	-	-436.314	-0.311208	No
chrI	2720992	2721441	Y71F9B.16_2720992_2721441	-	-166.275	-0.370323	No
chrI	2722766	2722935	Y71F9B.6_2722766_2722935	-	-45.848	-0.27129	No
chrI	2723034	2723728	Y71F9B.6_2723034_2723728	-	-220.248	-0.31736	No
chrI	2724169	2725228	Y71F9B.6_2724169_2725228	-	-667.851	-0.630643	YES
chrI	2725403	2725759	Y71F9B.6_2725403_2725759	-	-102.199	-0.287076	YES
chrI	2725909	2725987	Y71F9B.6_2725909_2725987	-	-11.184	-0.143385	No
chrI	2726072	2726140	Y71F9B.6_2726072_2726140	-	-19.781	-0.290897	No
chrI	2726268	2726319	Y71F9B.6_2726268_2726319	-	-14.939	-0.292922	No
chrI	2726477	2726530	Y71F9B.6_2726477_2726530	-	-14.448	-0.272604	No
chrI	2726704	2727015	Y71F9B.4_2726704_2727015	+	-89.114	-0.28654	YES
chrI	2727148	2727201	Y71F9B.4_2727148_2727201	+	-5.905	-0.111415	YES
chrI	2730238	2730922	Y71F9B.3_2730238_2730922	+	-501.5	-0.733187	YES
chrI	2731638	2732719	Y71F9B.2_2731638_2732719	+	-454.378	-0.420331	YES
chrI	2733435	2735138	Y71F9B.2_2733435_2735138	+	-1421.81	-0.834885	YES
chrI	2736273	2737442	Y71F9B.8_2736273_2737442	-	-610.742	-0.522448	YES
chrI	2737736	2738019	Y71F9B.8_2737736_2738019	-	-102.341	-0.361629	YES
chrI	2738265	2738492	Y71F9B.8_2738265_2738492	-	-89.153	-0.392744	YES
chrI	2738644	2741401	Y71F9B.8_2738644_2741401	-	-1041.44	-0.377744	YES
chrI	2741512	2742398	Y71F9B.8_2741512_2742398	-	-293.006	-0.330707	YES
chrI	2756122	2756168	Y71F9B.7_2756122_2756168	-	-7.324	-0.159217	No
chrI	2756612	2756660	Y71F9B.7_2756612_2756660	-	-9.053	-0.188604	No
chrI	2757095	2757385	Y71F9B.7_2757095_2757385	-	-90.372	-0.311628	No
chrI	2757498	2757546	Y71F9B.7_2757498_2757546	-	-10.325	-0.215104	No
chrI	2757838	2757894	Y71F9B.7_2757838_2757894	-	-9.709	-0.173375	YES
chrI	2759237	2759314	Y71F9B.9_2759237_2759314	-	-16.53	-0.214675	YES
chrI	2759684	2759730	Y71F9B.9_2759684_2759730	-	-7.889	-0.1715	No
chrI	2759972	2760327	Y71F9B.9_2759972_2760327	-	-174.537	-0.491654	YES
chrI	2760457	2760949	Y71F9B.9_2760457_2760949	-	-222.498	-0.452232	YES
chrI	2761515	2762148	Y71F9B.10_2761515_2762148	-	-275.035	-0.434494	YES
chrI	2762394	2763443	Y71F9B.10_2762394_2763443	-	-492.114	-0.469127	No
chrI	2764400	2765093	Y71F9B.10_2764400_2765093	-	-388.173	-0.560134	YES
chrI	2765679	2765739	Y71F9B.10_2765679_2765739	-	-14.478	-0.2413	No
chrI	2765898	2767171	Y71F9B.10_2765898_2767171	-	-284.336	-0.223359	No
[truncated: 107,983 more rows]

## Sheet: cb4_intron_dGnt
Chr	Start	Stop	Name	Strand	dG (kcal/mol)	dG/nt (kcal/mol*nt)
chrI	4622	8068	CBG26674_4622_8068	+	-1070.73	-0.310717
chrI	8646	8700	CBG23989_8646_8700	-	-20.728	-0.383852
chrI	8814	8982	CBG23989_8814_8982	-	-70.206	-0.417893
chrI	10588	10796	CBG23990_10588_10796	-	-52.421	-0.252024
chrI	10903	11140	CBG23990_10903_11140	-	-80.244	-0.338582
chrI	12413	12911	CBG23991_12413_12911	+	-179.069	-0.359576
chrI	13018	13225	CBG23991_13018_13225	+	-52.666	-0.254425
chrI	19075	21244	CBG11840_19075_21244	+	-764.533	-0.352482
chrI	21361	21773	CBG11840_21361_21773	+	-169.884	-0.41234
chrI	23508	23561	CBG11841_23508_23561	-	-14.162	-0.267208
chrI	23743	23879	CBG11841_23743_23879	-	-35.713	-0.262596
chrI	23942	24371	CBG11841_23942_24371	-	-152.135	-0.354627
chrI	26353	28052	CBG11841_26353_28052	-	-597.813	-0.351862
chrI	28156	28202	CBG11841_28156_28202	-	-7.666	-0.166652
chrI	28287	28371	CBG11841_28287_28371	-	-16.158	-0.192357
chrI	28491	28671	CBG11841_28491_28671	-	-48.105	-0.26725
chrI	30010	30171	CBG11842_30010_30171	-	-50.673	-0.314739
chrI	31062	31116	CBG11842_31062_31116	-	-11.898	-0.220333
chrI	33306	33864	CBG11843_33306_33864	-	-199.496	-0.35752
chrI	34293	34982	CBG11843_34293_34982	-	-244.319	-0.354599
chrI	36200	36270	CBG11844_36200_36270	-	-18	-0.257143
chrI	37215	38216	CBG11844_37215_38216	-	-396.662	-0.396266
chrI	55675	58204	CBG11848_55675_58204	+	-1156.39	-0.457252
chrI	58479	59676	CBG11848_58479_59676	+	-409.716	-0.342286
chrI	59772	60079	CBG11848_59772_60079	+	-117.96	-0.384235
chrI	60152	60784	CBG11848_60152_60784	+	-216.909	-0.34321
chrI	60993	62382	CBG11848_60993_62382	+	-502.614	-0.361853
chrI	60993	62669	CBG11848_60993_62669	+	-602.703	-0.359608
chrI	62472	62669	CBG11848_62472_62669	+	-56.69	-0.287766
chrI	62876	62929	CBG11848_62876_62929	+	-14.91	-0.281321
chrI	63017	63059	CBG11848_63017_63059	+	-10.483	-0.249595
chrI	63253	63310	CBG11848_63253_63310	+	-22.795	-0.399912
chrI	63416	63676	CBG11848_63416_63676	+	-86.184	-0.331477
chrI	64140	65019	CBG11848_64140_65019	+	-324.299	-0.368941
chrI	65212	67089	CBG11848_65212_67089	+	-617.312	-0.328882
chrI	67319	67921	CBG11848_67319_67921	+	-229.76	-0.381661
chrI	68067	68117	CBG11848_68067_68117	+	-10.53	-0.2106
chrI	70554	71152	CBG11848_70554_71152	+	-191.868	-0.320849
chrI	71240	71286	CBG11848_71240_71286	+	-12.062	-0.262217
chrI	74317	74946	CBG11849_74317_74946	-	-238.769	-0.379601
chrI	75620	76261	CBG11849_75620_76261	-	-259.008	-0.404069
chrI	77733	78656	CBG11849_77733_78656	-	-319.93	-0.34662
chrI	79072	79128	CBG11849_79072_79128	-	-17.436	-0.311357
chrI	79260	79530	CBG11849_79260_79530	-	-129.646	-0.48017
chrI	80754	80821	CBG11849_80754_80821	-	-27.643	-0.412582
chrI	80999	81291	CBG11849_80999_81291	-	-152.488	-0.522219
chrI	83752	84298	CBG25158_83752_84298	-	-225.334	-0.4127
chrI	91108	91819	CBG11851_91108_91819	-	-319.447	-0.449293
chrI	92132	92426	CBG11851_92132_92426	-	-114.5	-0.389456
chrI	92540	92613	CBG11851_92540_92613	-	-21.015	-0.287877
chrI	92796	93781	CBG11851_92796_93781	-	-466.379	-0.473481
chrI	94115	94925	CBG11851_94115_94925	-	-284.562	-0.351311
chrI	95077	95887	CBG11851_95077_95887	-	-275.419	-0.340023
chrI	97748	97854	CBG11852_97748_97854	-	-27.564	-0.260038
chrI	98250	99210	CBG11852_98250_99210	-	-317.115	-0.330328
chrI	99398	100544	CBG11852_99398_100544	-	-464.578	-0.405391
chrI	100964	101818	CBG11852_100964_101818	-	-315.561	-0.369509
chrI	102272	102488	CBG11852_102272_102488	-	-53.145	-0.246042
chrI	102272	103388	CBG11852_102272_103388	-	-375.619	-0.336576
chrI	102512	103388	CBG11852_102512_103388	-	-298.602	-0.34087
chrI	103611	104296	CBG11852_103611_104296	-	-258.252	-0.37701
chrI	104404	104627	CBG11852_104404_104627	-	-78.401	-0.351574
chrI	105080	105607	CBG11852_105080_105607	-	-174.232	-0.330611
chrI	105799	106161	CBG11852_105799_106161	-	-109.343	-0.302052
chrI	106349	106658	CBG11852_106349_106658	-	-107.527	-0.347984
chrI	107632	108451	CBG11852_107632_108451	-	-320.351	-0.391149
chrI	109132	110602	CBG11852_109132_110602	-	-544.179	-0.37019
chrI	112319	113284	CBG11852_112319_113284	-	-368.108	-0.381459
chrI	113587	114296	CBG11852_113587_114296	-	-273.306	-0.385481
chrI	114494	114696	CBG11852_114494_114696	-	-69.6	-0.344554
chrI	114894	115923	CBG11852_114894_115923	-	-360.969	-0.350796
chrI	115998	116541	CBG11852_115998_116541	-	-194.76	-0.358674
chrI	116637	117990	CBG11852_116637_117990	-	-433.255	-0.320218
chrI	118050	118662	CBG11852_118050_118662	-	-223.191	-0.364691
chrI	118941	119058	CBG11853_118941_119058	+	-22.672	-0.193778
chrI	119264	120142	CBG11853_119264_120142	+	-311.003	-0.354218
chrI	120316	120365	CBG11853_120316_120365	+	-11.771	-0.240224
chrI	120465	121289	CBG11853_120465_121289	+	-308.277	-0.374123
chrI	121552	122660	CBG11853_121552_122660	+	-412.181	-0.372005
chrI	123104	124715	CBG11853_123104_124715	+	-789.13	-0.489839
chrI	124937	124991	CBG11853_124937_124991	+	-9.396	-0.174
chrI	125222	125304	CBG11853_125222_125304	+	-30.229	-0.368646
chrI	125460	126373	CBG11853_125460_126373	+	-359.046	-0.39326
chrI	126733	127464	CBG11853_126733_127464	+	-263.606	-0.36061
chrI	127544	127594	CBG11853_127544_127594	+	-13.573	-0.27146
chrI	127712	127811	CBG11853_127712_127811	+	-29.69	-0.299899
chrI	127925	127973	CBG11853_127925_127973	+	-16.209	-0.337688
chrI	128101	128542	CBG11853_128101_128542	+	-166.534	-0.377628
chrI	128644	128693	CBG11853_128644_128693	+	-8.755	-0.178673
chrI	129000	129358	CBG11853_129000_129358	+	-124.557	-0.347925
chrI	132524	132578	CBG11853_132524_132578	+	-9.396	-0.174
chrI	132809	132891	CBG11853_132809_132891	+	-30.229	-0.368646
chrI	133047	133960	CBG11853_133047_133960	+	-359.046	-0.39326
chrI	134320	135051	CBG11853_134320_135051	+	-263.606	-0.36061
chrI	135131	135181	CBG11853_135131_135181	+	-13.573	-0.27146
chrI	135299	135398	CBG11853_135299_135398	+	-29.69	-0.299899
chrI	135512	135560	CBG11853_135512_135560	+	-16.209	-0.337688
chrI	135688	136129	CBG11853_135688_136129	+	-166.534	-0.377628
chrI	136231	136280	CBG11853_136231_136280	+	-8.755	-0.178673
chrI	136587	136945	CBG11853_136587_136945	+	-124.557	-0.347925
chrI	137133	139867	CBG11853_137133_139867	+	-1310.95	-0.479499
chrI	140108	146369	CBG11853_140108_146369	+	-2318.42	-0.370295
chrI	141016	141134	CBG11854_141016_141134	-	-34.219	-0.289992
chrI	141736	141782	CBG11854_141736_141782	-	-4.618	-0.100391
chrI	142392	142443	CBG11854_142392_142443	-	-13.626	-0.267176
chrI	143337	143535	CBG11855_143337_143535	-	-81.805	-0.413157
chrI	146607	146651	CBG11853_146607_146651	+	-9.278	-0.210864
chrI	147154	148084	CBG11853_147154_148084	+	-405.526	-0.436049
chrI	148333	148420	CBG11853_148333_148420	+	-38.039	-0.43723
chrI	148520	149197	CBG11853_148520_149197	+	-259.999	-0.384046
chrI	149409	149615	CBG11853_149409_149615	+	-76.956	-0.373573
chrI	149913	150543	CBG11853_149913_150543	+	-293.607	-0.466043
chrI	150875	151294	CBG11853_150875_151294	+	-148.868	-0.355294
chrI	151624	152180	CBG11853_151624_152180	+	-305.251	-0.549013
chrI	152302	152750	CBG11853_152302_152750	+	-236.664	-0.528268
chrI	153207	153844	CBG11853_153207_153844	+	-225.904	-0.354637
chrI	154126	154686	CBG11853_154126_154686	+	-268.695	-0.479813
chrI	155224	155349	CBG11853_155224_155349	+	-37.308	-0.298464
chrI	155454	155827	CBG11853_155454_155827	+	-126.374	-0.338804
chrI	155947	156250	CBG11853_155947_156250	+	-109.993	-0.363013
chrI	156483	157008	CBG11853_156483_157008	+	-224.518	-0.427653
chrI	157231	157779	CBG11853_157231_157779	+	-229.623	-0.41902
chrI	157922	157967	CBG11853_157922_157967	+	-10.879	-0.241756
chrI	158162	158209	CBG11853_158162_158209	+	-8.792	-0.187064
chrI	158347	158398	CBG11853_158347_158398	+	-12.193	-0.239078
chrI	158524	160965	CBG11853_158524_160965	+	-908.669	-0.372253
chrI	161114	161159	CBG11853_161114_161159	+	-13.068	-0.2904
chrI	161283	161336	CBG11853_161283_161336	+	-11.696	-0.220679
chrI	161458	161671	CBG11853_161458_161671	+	-88.61	-0.416009
chrI	161915	162219	CBG11853_161915_162219	+	-119.597	-0.393411
chrI	163080	163319	CBG11853_163080_163319	+	-124.202	-0.519674
chrI	163463	163953	CBG11853_163463_163953	+	-282.462	-0.576453
chrI	164122	164778	CBG11853_164122_164778	+	-284.684	-0.43397
chrI	165072	165144	CBG11853_165072_165144	+	-29.353	-0.407681
chrI	165425	166448	CBG11853_165425_166448	+	-479.112	-0.46834
chrI	166782	167872	CBG11853_166782_167872	+	-468.305	-0.429638
chrI	168060	168272	CBG11853_168060_168272	+	-73.154	-0.345066
chrI	168405	170439	CBG11853_168405_170439	+	-909.382	-0.44709
chrI	170831	171396	CBG11853_170831_171396	+	-188.532	-0.333685
chrI	176795	177360	CBG11861_176795_177360	+	-188.532	-0.333685
chrI	178396	178544	CBG11862_178396_178544	-	-43.697	-0.29525
chrI	178923	178972	CBG11862_178923_178972	-	-10.376	-0.211755
chrI	179547	179590	CBG11862_179547_179590	-	-11.668	-0.271349
chrI	180899	180943	CBG11862_180899_180943	-	-4.043	-0.091886
chrI	181150	181227	CBG11862_181150_181227	-	-26.18	-0.34
chrI	183273	183322	CBG11863_183273_183322	+	-16.915	-0.345204
chrI	183522	183574	CBG11863_183522_183574	+	-16.216	-0.311846
chrI	183756	183805	CBG11863_183756_183805	+	-9.68	-0.197551
chrI	183960	184013	CBG11863_183960_184013	+	-11.237	-0.212019
chrI	184332	184431	CBG11863_184332_184431	+	-27.253	-0.275283
chrI	184641	184687	CBG11863_184641_184687	+	-15.655	-0.340326
chrI	184820	184981	CBG11863_184820_184981	+	-51.351	-0.31895
chrI	185186	185296	CBG11863_185186_185296	+	-38.16	-0.346909
chrI	185593	185647	CBG11863_185593_185647	+	-13.679	-0.253315
chrI	185751	185802	CBG11863_185751_185802	+	-8.454	-0.165765
chrI	187338	187919	CBG11864_187338_187919	+	-189.976	-0.326981
chrI	188022	188127	CBG11864_188022_188127	+	-34.799	-0.331419
chrI	188433	188950	CBG11864_188433_188950	+	-218.307	-0.422257
chrI	189230	189293	CBG11864_189230_189293	+	-13.671	-0.217
chrI	189617	190283	CBG11864_189617_190283	+	-225.057	-0.337923
chrI	190698	190747	CBG11864_190698_190747	+	-11.135	-0.227245
chrI	191327	191927	CBG11864_191327_191927	+	-279.302	-0.465503
chrI	192038	192101	CBG11864_192038_192101	+	-13.756	-0.218349
chrI	192634	193236	CBG11864_192634_193236	+	-312.8	-0.519601
chrI	193417	193654	CBG11864_193417_193654	+	-82.246	-0.34703
chrI	193825	194123	CBG11864_193825_194123	+	-140.246	-0.470624
chrI	194478	194885	CBG11864_194478_194885	+	-119.063	-0.292538
chrI	196762	197265	CBG11865_196762_197265	+	-168.035	-0.334066
chrI	197270	197416	CBG11865_197270_197416	+	-42.124	-0.288521
chrI	197433	197782	CBG11865_197433_197782	+	-112.763	-0.323103
chrI	197873	198634	CBG11865_197873_198634	+	-251.338	-0.330273
chrI	198726	199104	CBG11865_198726_199104	+	-177.815	-0.47041
chrI	199338	199503	CBG11865_199338_199503	+	-54.36	-0.329455
chrI	199617	199802	CBG11865_199617_199802	+	-56.101	-0.303249
chrI	200023	200450	CBG11865_200023_200450	+	-140.47	-0.32897
chrI	201202	201492	CBG11867_201202_201492	-	-92.848	-0.320166
chrI	201616	202014	CBG11867_201616_202014	-	-192.257	-0.483058
chrI	202331	202445	CBG11867_202331_202445	-	-46.925	-0.411623
chrI	202849	203417	CBG11867_202849_203417	-	-254.862	-0.448701
chrI	204158	205086	CBG11867_204158_205086	-	-430.754	-0.464175
chrI	205356	205839	CBG11867_205356_205839	-	-155.233	-0.321393
chrI	206012	206546	CBG11867_206012_206546	-	-209.609	-0.392526
chrI	207468	207957	CBG11867_207468_207957	-	-209.863	-0.429168
chrI	208924	209355	CBG11867_208924_209355	-	-152.471	-0.353761
chrI	210267	211075	CBG11867_210267_211075	-	-353.956	-0.438064
chrI	211836	211886	CBG11867_211836_211886	-	-12.84	-0.2568
chrI	212138	212242	CBG11867_212138_212242	-	-33.252	-0.319731
chrI	214573	214618	CBG11868_214573_214618	+	-12.908	-0.286844
chrI	216014	216641	CBG11869_216014_216641	-	-266.482	-0.425011
chrI	218316	218373	CBG11870_218316_218373	+	-18.649	-0.327175
chrI	218481	219892	CBG11870_218481_219892	+	-511.548	-0.362543
chrI	220471	221163	CBG11870_220471_221163	+	-375.698	-0.542916
chrI	221272	221668	CBG11870_221272_221668	+	-231.465	-0.584508
chrI	223086	223135	CBG11870_223086_223135	+	-12.03	-0.24551
chrI	223269	223317	CBG11870_223269_223317	+	-16.234	-0.338208
chrI	224807	225114	CBG11871_224807_225114	-	-82.447	-0.268557
chrI	225189	225229	CBG11871_225189_225229	-	-10.196	-0.2549
chrI	225370	225417	CBG11871_225370_225417	-	-12.924	-0.274979
chrI	225590	226295	CBG11871_225590_226295	-	-339.955	-0.482206
chrI	226428	226474	CBG11871_226428_226474	-	-7.924	-0.172261
chrI	226549	226603	CBG11871_226549_226603	-	-13.809	-0.255722
chrI	226928	226968	CBG11871_226928_226968	-	-5.787	-0.144675
chrI	227123	227739	CBG11871_227123_227739	-	-268.983	-0.436661
chrI	227889	227938	CBG11871_227889_227938	-	-12.745	-0.260102
chrI	233150	233376	CBG11872_233150_233376	-	-84.135	-0.372279
chrI	233923	234172	CBG11872_233923_234172	-	-117.171	-0.470566
chrI	247348	247397	CBG11874_247348_247397	+	-12.837	-0.26198
chrI	247463	247509	CBG11874_247463_247509	+	-5.728	-0.124522
chrI	247609	247834	CBG11874_247609_247834	+	-85.606	-0.380471
chrI	255641	255937	CBG11877_255641_255937	-	-87.77	-0.29652
chrI	257971	258244	CBG11877_257971_258244	-	-126.515	-0.463425
chrI	258278	258472	CBG11877_258278_258472	-	-75.215	-0.387706
chrI	259284	259367	CBG11877_259284_259367	-	-24.019	-0.289386
chrI	259469	259785	CBG11877_259469_259785	-	-96.508	-0.305405
chrI	259868	259985	CBG11877_259868_259985	-	-35.46	-0.303077
chrI	260825	260877	CBG11878_260825_260877	+	-17.579	-0.338058
chrI	263436	263872	CBG11879_263436_263872	+	-146.549	-0.336122
chrI	264142	266744	CBG11879_264142_266744	+	-911.956	-0.350483
chrI	267049	267800	CBG11879_267049_267800	+	-209.017	-0.278318
chrI	268089	268304	CBG11879_268089_268304	+	-109.266	-0.508214
chrI	269035	269457	CBG11879_269035_269457	+	-113.312	-0.268512
chrI	269626	269837	CBG11879_269626_269837	+	-65.587	-0.310839
chrI	270707	270887	CBG11879_270707_270887	+	-81.728	-0.454044
chrI	270962	271129	CBG11879_270962_271129	+	-56.593	-0.33888
chrI	271418	271483	CBG11879_271418_271483	+	-13.128	-0.201969
chrI	272973	273024	CBG11880_272973_273024	+	-13.177	-0.258373
chrI	273131	273861	CBG11880_273131_273861	+	-196.439	-0.269095
chrI	274120	274555	CBG11880_274120_274555	+	-150.752	-0.346556
chrI	274761	275495	CBG11880_274761_275495	+	-214.968	-0.292872
chrI	275657	276183	CBG11880_275657_276183	+	-222.053	-0.422154
chrI	277260	277486	CBG11880_277260_277486	+	-107.582	-0.476027
chrI	277615	278082	CBG11880_277615_278082	+	-221.809	-0.474966
chrI	278302	278888	CBG11880_278302_278888	+	-237.124	-0.404648
chrI	280570	280682	CBG11880_280570_280682	+	-29.442	-0.262875
chrI	282663	283150	CBG11881_282663_283150	-	-169.737	-0.348536
chrI	283410	283798	CBG11881_283410_283798	-	-165.326	-0.426098
chrI	283963	284081	CBG11881_283963_284081	-	-37.43	-0.317203
chrI	284405	284819	CBG11881_284405_284819	-	-148.202	-0.357976
chrI	284883	288785	CBG11881_284883_288785	-	-1494.39	-0.382981
chrI	289008	289617	CBG11881_289008_289617	-	-262.318	-0.430736
chrI	294959	297689	CBG11882_294959_297689	+	-896.937	-0.328548
chrI	297860	298330	CBG11882_297860_298330	+	-162.984	-0.346774
chrI	299530	299713	CBG11882_299530_299713	+	-75.247	-0.411186
chrI	299950	300129	CBG11882_299950_300129	+	-53.377	-0.298196
chrI	300625	300673	CBG11882_300625_300673	+	-11.373	-0.236938
chrI	300862	301301	CBG11882_300862_301301	+	-179.283	-0.40839
chrI	301485	301900	CBG11882_301485_301900	+	-145.521	-0.350653
chrI	302535	302586	CBG11882_302535_302586	+	-10.152	-0.199059
chrI	302868	303432	CBG11882_302868_303432	+	-196.533	-0.348463
chrI	303736	303792	CBG11882_303736_303792	+	-9.793	-0.174875
chrI	304851	305297	CBG11882_304851_305297	+	-121.637	-0.272729
chrI	306679	306723	CBG11882_306679_306723	+	-8.068	-0.183364
chrI	307452	307704	CBG11882_307452_307704	+	-102.365	-0.40621
chrI	311368	311432	CBG11882_311368_311432	+	-18.033	-0.281766
chrI	311579	311761	CBG11882_311579_311761	+	-54.74	-0.300769
chrI	313809	313856	CBG11882_313809_313856	+	-5.54	-0.117872
chrI	314331	314566	CBG11882_314331_314566	+	-76.422	-0.3252
chrI	316209	316869	CBG11882_316209_316869	+	-282.677	-0.428298
chrI	317116	317697	CBG11882_317116_317697	+	-193.212	-0.332551
chrI	319684	320177	CBG11883_319684_320177	-	-259.502	-0.526373
chrI	320413	320644	CBG11883_320413_320644	-	-82.181	-0.355762
chrI	321427	321874	CBG11883_321427_321874	-	-140.414	-0.314125
chrI	322272	322967	CBG11883_322272_322967	-	-280.952	-0.404247
chrI	330838	331137	CBG11884_330838_331137	+	-123.807	-0.41407
chrI	331531	331585	CBG11884_331531_331585	+	-13.52	-0.25037
chrI	331927	332320	CBG11884_331927_332320	+	-136.708	-0.347858
chrI	334470	335120	CBG11885_334470_335120	-	-169.884	-0.26136
chrI	335291	335422	CBG11885_335291_335422	-	-41.886	-0.31974
chrI	335520	336186	CBG11885_335520_336186	-	-221.652	-0.332811
chrI	336276	336649	CBG11885_336276_336649	-	-140.427	-0.37648
chrI	336865	336912	CBG11885_336865_336912	-	-15.648	-0.332936
chrI	337083	337259	CBG11885_337083_337259	-	-58.529	-0.332551
chrI	337349	338386	CBG11885_337349_338386	-	-494.559	-0.476913
chrI	341948	342593	CBG11886_341948_342593	-	-242.224	-0.375541
chrI	342704	342755	CBG11886_342704_342755	-	-13.232	-0.259451
chrI	342882	342926	CBG11886_342882_342926	-	-7.01	-0.159318
chrI	343093	343488	CBG11886_343093_343488	-	-171.238	-0.433514
chrI	343723	343768	CBG11886_343723_343768	-	-11.312	-0.251378
chrI	343894	343994	CBG11886_343894_343994	-	-28.721	-0.28721
chrI	344238	344681	CBG11886_344238_344681	-	-179.904	-0.406104
chrI	344765	344807	CBG11886_344765_344807	-	-2.345	-0.055833
chrI	344874	345516	CBG11886_344874_345516	-	-294.784	-0.459165
chrI	345640	345698	CBG11886_345640_345698	-	-19.407	-0.334603
chrI	345769	345813	CBG11886_345769_345813	-	-7.367	-0.167432
chrI	345892	345939	CBG11886_345892_345939	-	-10.787	-0.229511
chrI	346024	346680	CBG11886_346024_346680	-	-250.011	-0.381114
chrI	346791	346963	CBG11886_346791_346963	-	-49.845	-0.289797
chrI	352079	352619	CBG11888_352079_352619	-	-176.602	-0.327041
chrI	352887	352932	CBG11888_352887_352932	-	-5.954	-0.132311
chrI	353058	353107	CBG11888_353058_353107	-	-12.63	-0.257755
chrI	353223	353288	CBG11888_353223_353288	-	-17.552	-0.270031
chrI	353572	354079	CBG11888_353572_354079	-	-200.452	-0.395369
chrI	354711	355210	CBG11888_354711_355210	-	-150.526	-0.301655
chrI	355906	356196	CBG11888_355906_356196	-	-76.372	-0.263352
chrI	375241	375291	CBG11890_375241_375291	+	-10.02	-0.2004
chrI	375387	375438	CBG11890_375387_375438	+	-14.77	-0.289608
chrI	375601	375647	CBG11890_375601_375647	+	-5.482	-0.119174
chrI	376418	376471	CBG11891_376418_376471	+	-12.531	-0.236434
chrI	377073	377123	CBG11891_377073_377123	+	-10.612	-0.21224
chrI	377215	377266	CBG11891_377215_377266	+	-13.348	-0.261725
chrI	377614	377658	CBG11891_377614_377658	+	-7.698	-0.174955
chrI	379130	379177	CBG11891_379130_379177	+	-7.599	-0.161681
chrI	379954	380002	CBG11891_379954_380002	+	-10.409	-0.216854
chrI	380890	380944	CBG11892_380890_380944	+	-12.496	-0.231407
chrI	381072	381125	CBG11892_381072_381125	+	-16.922	-0.319283
chrI	381521	381569	CBG11892_381521_381569	+	-18.089	-0.376854
chrI	381784	381923	CBG11892_381784_381923	+	-43.989	-0.316468
chrI	382171	382412	CBG11892_382171_382412	+	-83.153	-0.345033
chrI	382672	382714	CBG11892_382672_382714	+	-11.258	-0.268048
chrI	384088	384132	CBG25164_384088_384132	-	-8.148	-0.185182
chrI	384575	384972	CBG25164_384575_384972	-	-105.385	-0.265453
chrI	387488	387535	CBG11894_387488_387535	+	-8.403	-0.178787
chrI	387846	387891	CBG11894_387846_387891	+	-10.007	-0.222378
chrI	391321	391490	CBG11896_391321_391490	+	-60.317	-0.356905
chrI	391592	391946	CBG11896_391592_391946	+	-128.063	-0.36176
chrI	392477	392657	CBG11896_392477_392657	+	-60.243	-0.334683
chrI	393878	394031	CBG11896_393878_394031	+	-43.447	-0.283967
chrI	394130	394180	CBG11896_394130_394180	+	-12.032	-0.24064
chrI	397043	397272	CBG11897_397043_397272	-	-62.913	-0.274729
chrI	397326	397656	CBG11897_397326_397656	-	-75.195	-0.227864
chrI	397775	397932	CBG11897_397775_397932	-	-40.343	-0.256962
chrI	398025	398073	CBG11897_398025_398073	-	-15.023	-0.312979
chrI	398198	398350	CBG11897_398198_398350	-	-33.471	-0.220204
chrI	398601	398725	CBG11897_398601_398725	-	-36.05	-0.290726
chrI	399037	399102	CBG11897_399037_399102	-	-14.592	-0.224492
chrI	399282	399716	CBG11897_399282_399716	-	-128.473	-0.296021
chrI	412705	412750	CBG25165_412705_412750	-	-9.331	-0.207356
chrI	414201	414244	CBG11900_414201_414244	+	-11.101	-0.258163
chrI	414379	414424	CBG11900_414379_414424	+	-9.341	-0.207578
chrI	414706	414749	CBG11900_414706_414749	+	-10.104	-0.234977
chrI	414969	415012	CBG11900_414969_415012	+	-11.205	-0.260581
chrI	415183	415227	CBG11900_415183_415227	+	-9.873	-0.224386
chrI	415363	416851	CBG11900_415363_416851	+	-703.155	-0.47255
chrI	427389	427453	CBG00319_427389_427453	+	-35.106	-0.548531
chrI	427585	427632	CBG00319_427585_427632	+	-24.153	-0.513894
chrI	427709	427753	CBG00319_427709_427753	+	-9.507	-0.216068
chrI	427953	428238	CBG00319_427953_428238	+	-107.472	-0.377095
chrI	428517	428944	CBG00319_428517_428944	+	-174.517	-0.408705
chrI	429026	429081	CBG00319_429026_429081	+	-14.103	-0.256418
chrI	429139	429184	CBG00319_429139_429184	+	-6.27	-0.139333
chrI	429334	430549	CBG00319_429334_430549	+	-580.471	-0.477754
chrI	430723	431120	CBG00319_430723_431120	+	-138.44	-0.348715
chrI	431989	432124	CBG25167_431989_432124	-	-40.931	-0.303193
chrI	434479	434949	CBG00317_434479_434949	-	-158.243	-0.336687
chrI	435942	435987	CBG00317_435942_435987	-	-7.614	-0.1692
chrI	437820	438358	CBG00316_437820_438358	-	-154.553	-0.287273
chrI	438403	438452	CBG00316_438403_438452	-	-7.502	-0.153102
chrI	439343	439388	CBG00316_439343_439388	-	-9.208	-0.204622
chrI	440116	440165	CBG00315_440116_440165	-	-12.747	-0.260143
chrI	440375	440720	CBG00315_440375_440720	-	-108.926	-0.315728
chrI	440931	440978	CBG00315_440931_440978	-	-16.439	-0.349766
chrI	441115	441160	CBG00315_441115_441160	-	-9.667	-0.214822
chrI	441999	442045	CBG00314_441999_442045	-	-11.246	-0.244478
chrI	442927	442971	CBG00314_442927_442971	-	-8.014	-0.182136
chrI	444637	445736	CBG00313_444637_445736	-	-493.75	-0.449272
chrI	445756	445798	CBG00313_445756_445798	-	-12.286	-0.292524
chrI	446813	447392	CBG00313_446813_447392	-	-225.602	-0.389641
chrI	447580	447699	CBG00312_447580_447699	+	-24.202	-0.203378
chrI	448025	448067	CBG00312_448025_448067	+	-6.25	-0.14881
chrI	457177	457779	CBG00310_457177_457779	-	-210.656	-0.349927
chrI	458067	458295	CBG00310_458067_458295	-	-60.385	-0.264846
chrI	458391	458585	CBG00310_458391_458585	-	-58.577	-0.301943
chrI	458696	459076	CBG00310_458696_459076	-	-105.023	-0.276376
chrI	459747	459817	CBG00309_459747_459817	+	-20.22	-0.288857
chrI	460017	460084	CBG00309_460017_460084	+	-19.347	-0.288761
chrI	460233	460704	CBG00309_460233_460704	+	-134.933	-0.286482
chrI	460936	461509	CBG00309_460936_461509	+	-180.038	-0.314202
chrI	461729	461968	CBG00309_461729_461968	+	-80.44	-0.336569
chrI	462126	463292	CBG00309_462126_463292	+	-353.923	-0.303536
chrI	463650	464578	CBG00309_463650_464578	+	-385.778	-0.415709
chrI	468801	469330	CBG00308_468801_469330	+	-198.016	-0.374321
chrI	471146	472192	CBG00308_471146_472192	+	-407.83	-0.389895
chrI	472407	472496	CBG00308_472407_472496	+	-35.996	-0.404449
chrI	472568	472674	CBG00308_472568_472674	+	-33.096	-0.312226
chrI	472927	473267	CBG00308_472927_473267	+	-156.384	-0.459953
chrI	477450	478426	CBG00305_477450_478426	+	-393.467	-0.403142
chrI	478613	478902	CBG00305_478613_478902	+	-135.279	-0.468093
chrI	479489	479660	CBG00306_479489_479660	-	-51.029	-0.298415
chrI	483875	483944	CBG00306_483875_483944	-	-11.237	-0.162855
chrI	484023	484073	CBG00306_484023_484073	-	-10.153	-0.20306
chrI	484443	484910	CBG00306_484443_484910	-	-219.906	-0.470891
chrI	485158	485859	CBG00306_485158_485859	-	-313.72	-0.447532
chrI	486012	486749	CBG00306_486012_486749	-	-294.141	-0.399106
chrI	486854	487520	CBG00306_486854_487520	-	-283.931	-0.426323
chrI	487706	487939	CBG00306_487706_487939	-	-88.624	-0.380361
chrI	493851	494635	CBG00305_493851_494635	+	-355.87	-0.453916
chrI	494734	494823	CBG00305_494734_494823	+	-24.995	-0.280843
chrI	495569	495643	CBG00304_495569_495643	+	-20.013	-0.270446
chrI	497583	497634	CBG00303_497583_497634	+	-17.929	-0.351549
chrI	497759	497808	CBG00303_497759_497808	+	-6.499	-0.132633
chrI	497925	497977	CBG00303_497925_497977	+	-10.891	-0.209442
chrI	498121	498170	CBG00303_498121_498170	+	-5.406	-0.110327
chrI	498377	498424	CBG00303_498377_498424	+	-7.488	-0.159319
chrI	500368	500415	CBG00302_500368_500415	-	-8.313	-0.176872
chrI	501829	501957	CBG00301_501829_501957	+	-32.249	-0.251945
chrI	502047	502116	CBG00301_502047_502116	+	-26.018	-0.377072
chrI	502246	503664	CBG00301_502246_503664	+	-385.824	-0.27209
chrI	503955	504306	CBG00301_503955_504306	+	-104.93	-0.298946
chrI	504674	505345	CBG00301_504674_505345	+	-308.363	-0.459557
chrI	506681	507362	CBG00300_506681_507362	-	-355.162	-0.52153
chrI	507598	508253	CBG00300_507598_508253	-	-270.847	-0.413507
chrI	530328	530868	CBG00298_530328_530868	-	-175.45	-0.324907
chrI	530920	530966	CBG00298_530920_530966	-	-11.236	-0.244261
chrI	531053	531095	CBG00298_531053_531095	-	-5.807	-0.138262
chrI	531184	531230	CBG00298_531184_531230	-	-13.457	-0.292543
chrI	531411	531645	CBG00298_531411_531645	-	-86.812	-0.370991
chrI	531726	531785	CBG00298_531726_531785	-	-20.062	-0.340034
chrI	531928	532041	CBG00298_531928_532041	-	-61.121	-0.540894
chrI	532110	532256	CBG00298_532110_532256	-	-45.235	-0.309829
chrI	532325	532655	CBG00298_532325_532655	-	-134.108	-0.406388
chrI	532746	532830	CBG00298_532746_532830	-	-22.287	-0.265321
chrI	532911	532962	CBG00298_532911_532962	-	-14.527	-0.284843
chrI	533135	533205	CBG00298_533135_533205	-	-17.48	-0.249714
chrI	533274	533329	CBG00298_533274_533329	-	-12.078	-0.2196
chrI	533383	533465	CBG00298_533383_533465	-	-17.227	-0.210085
chrI	533720	533994	CBG00298_533720_533994	-	-100.534	-0.366912
chrI	534091	534582	CBG00298_534091_534582	-	-179.603	-0.36579
chrI	534758	534953	CBG00298_534758_534953	-	-85.48	-0.438359
chrI	535010	535079	CBG00298_535010_535079	-	-17.905	-0.259493
chrI	535488	535538	CBG00297_535488_535538	-	-14.349	-0.28698
chrI	535649	536501	CBG00297_535649_536501	-	-188.879	-0.221689
chrI	536584	536651	CBG00297_536584_536651	-	-17.099	-0.255209
chrI	536708	536997	CBG00297_536708_536997	-	-131.027	-0.453381
chrI	537166	537927	CBG00297_537166_537927	-	-320.555	-0.421229
chrI	538112	538166	CBG00297_538112_538166	-	-5.637	-0.104389
chrI	538232	538338	CBG00297_538232_538338	-	-34.403	-0.324557
chrI	544162	544252	CBG00295_544162_544252	-	-21.326	-0.236956
chrI	544437	544489	CBG00295_544437_544489	-	-10.18	-0.195769
chrI	544555	544798	CBG00295_544555_544798	-	-63.775	-0.262449
chrI	545176	545225	CBG00295_545176_545225	-	-6.937	-0.141571
chrI	545335	545677	CBG00295_545335_545677	-	-99.553	-0.291091
chrI	547468	547989	CBG00294_547468_547989	+	-140.694	-0.270046
chrI	548145	548680	CBG00294_548145_548680	+	-155.671	-0.290974
chrI	548998	549099	CBG00294_548998_549099	+	-45.185	-0.447376
chrI	550150	550481	CBG00293_550150_550481	-	-123.24	-0.372326
chrI	554399	555340	CBG00292_554399_555340	-	-337.843	-0.359026
chrI	555455	556037	CBG00292_555455_556037	-	-267.282	-0.459247
chrI	556139	556260	CBG00292_556139_556260	-	-36.085	-0.298223
chrI	556404	556768	CBG00292_556404_556768	-	-125.545	-0.344904
chrI	556957	557032	CBG00292_556957_557032	-	-21.84	-0.2912
chrI	557112	557260	CBG00292_557112_557260	-	-40.005	-0.270304
chrI	557534	557585	CBG00292_557534_557585	-	-8.817	-0.172882
chrI	558210	558328	CBG00291_558210_558328	+	-32.828	-0.278203
chrI	558412	558470	CBG00291_558412_558470	+	-19.369	-0.333948
chrI	560231	560467	CBG00290_560231_560467	+	-84.772	-0.359203
chrI	560592	561083	CBG00290_560592_561083	+	-196.529	-0.400263
chrI	561582	562696	CBG00290_561582_562696	+	-525.644	-0.471853
chrI	562820	563077	CBG00290_562820_563077	+	-74.119	-0.288401
chrI	565781	565832	CBG25166_565781_565832	-	-11.979	-0.234882
chrI	565919	565967	CBG25166_565919_565967	-	-8.479	-0.176646
chrI	566059	566105	CBG25166_566059_566105	-	-11.447	-0.248848
chrI	566262	566378	CBG25166_566262_566378	-	-31.004	-0.267276
chrI	566468	566520	CBG25166_566468_566520	-	-19.75	-0.379808
chrI	566617	567182	CBG25166_566617_567182	-	-205.942	-0.364499
chrI	567289	567414	CBG25166_567289_567414	-	-61.214	-0.489712
chrI	567590	567637	CBG25166_567590_567637	-	-13.366	-0.284383
chrI	567694	569352	CBG25166_567694_569352	-	-517.802	-0.312305
chrI	569362	569483	CBG25166_569362_569483	-	-29.1	-0.240496
chrI	570097	570298	CBG00288_570097_570298	+	-79.817	-0.3971
chrI	570405	570469	CBG00288_570405_570469	+	-16.753	-0.261766
chrI	570577	570628	CBG00288_570577_570628	+	-9.363	-0.183588
chrI	570741	572176	CBG00288_570741_572176	+	-533.877	-0.37204
chrI	572378	572435	CBG00288_572378_572435	+	-18.998	-0.333298
chrI	576350	576390	CBG00288_576350_576390	+	-9.647	-0.241175
chrI	576481	576621	CBG00288_576481_576621	+	-50.602	-0.361443
chrI	576798	576874	CBG00288_576798_576874	+	-14.233	-0.187276
chrI	577005	577084	CBG00288_577005_577084	+	-12.486	-0.158051
chrI	577432	577971	CBG00288_577432_577971	+	-249.01	-0.461985
chrI	578158	578204	CBG00288_578158_578204	+	-9.521	-0.206978
chrI	578365	578781	CBG00288_578365_578781	+	-120.272	-0.289115
chrI	578998	579044	CBG00288_578998_579044	+	-9.144	-0.198783
chrI	579313	579402	CBG00288_579313_579402	+	-27.315	-0.30691
chrI	579580	579743	CBG00288_579580_579743	+	-65.36	-0.400982
chrI	579883	580399	CBG00288_579883_580399	+	-154.43	-0.299283
chrI	580510	580561	CBG00288_580510_580561	+	-14.403	-0.282412
chrI	580643	580689	CBG00288_580643_580689	+	-14.028	-0.304957
chrI	580739	580917	CBG00288_580739_580917	+	-50.828	-0.285551
chrI	581025	581071	CBG00288_581025_581071	+	-4.224	-0.091826
chrI	581174	581215	CBG00288_581174_581215	+	-4.522	-0.110293
chrI	581254	581877	CBG00288_581254_581877	+	-210.054	-0.337165
chrI	581934	581981	CBG00288_581934_581981	+	-13.366	-0.284383
chrI	582157	582282	CBG00288_582157_582282	+	-61.214	-0.489712
chrI	582364	582854	CBG00288_582364_582854	+	-190.282	-0.388331
chrI	583051	583103	CBG00288_583051_583103	+	-19.75	-0.379808
chrI	583193	583309	CBG00288_583193_583309	+	-31.004	-0.267276
chrI	583466	583512	CBG00288_583466_583512	+	-11.919	-0.259109
chrI	583604	583652	CBG00288_583604_583652	+	-8.479	-0.176646
chrI	583739	583790	CBG00288_583739_583790	+	-11.979	-0.234882
chrI	585139	585186	CBG00286_585139_585186	+	-10.509	-0.223596
chrI	585292	585357	CBG00286_585292_585357	+	-14.622	-0.224954
chrI	585444	585953	CBG00286_585444_585953	+	-182.459	-0.358466
chrI	586020	586078	CBG00286_586020_586078	+	-19.795	-0.341293
chrI	586209	586271	CBG00286_586209_586271	+	-19.168	-0.309161
chrI	586527	586571	CBG00286_586527_586571	+	-9.045	-0.205568
chrI	586748	586988	CBG00286_586748_586988	+	-80.454	-0.335225
chrI	587345	587389	CBG00286_587345_587389	+	-10.28	-0.233636
chrI	587566	588142	CBG00286_587566_588142	+	-199.946	-0.347128
chrI	588217	588269	CBG00286_588217_588269	+	-8.34	-0.160385
chrI	588446	588511	CBG00286_588446_588511	+	-12.474	-0.191908
chrI	588642	588705	CBG00286_588642_588705	+	-17.391	-0.276048
chrI	590958	591051	CBG00285_590958_591051	-	-30.18	-0.324516
chrI	591159	591653	CBG00285_591159_591653	-	-204.294	-0.413551
chrI	608309	608351	CBG00282_608309_608351	-	-13.791	-0.328357
chrI	608494	608538	CBG00282_608494_608538	-	-14.205	-0.322841
chrI	608779	609513	CBG00282_608779_609513	-	-325.028	-0.442817
chrI	609698	609908	CBG00282_609698_609908	-	-65.544	-0.312114
chrI	610070	610513	CBG00282_610070_610513	-	-192.608	-0.434781
chrI	610955	611165	CBG00282_610955_611165	-	-73.748	-0.351181
chrI	614258	614310	CBG00280_614258_614310	+	-10.954	-0.210654
chrI	614489	614631	CBG00280_614489_614631	+	-43.492	-0.306282
chrI	615140	615186	CBG00279_615140_615186	-	-11.405	-0.247935
chrI	615300	615346	CBG00279_615300_615346	-	-13.934	-0.302913
chrI	615460	616017	CBG00279_615460_616017	-	-231.933	-0.416397
chrI	617481	618410	CBG00320_617481_618410	-	-365.763	-0.393717
chrI	618612	618762	CBG00320_618612_618762	-	-38.734	-0.258227
chrI	618945	619368	CBG00320_618945_619368	-	-178.439	-0.421842
chrI	619552	619667	CBG00320_619552_619667	-	-34.556	-0.300487
chrI	621172	621230	CBG00321_621172_621230	+	-16.456	-0.283724
chrI	621326	621376	CBG00321_621326_621376	+	-17.61	-0.3522
chrI	621445	622578	CBG00321_621445_622578	+	-604.248	-0.533317
chrI	622953	624157	CBG00321_622953_624157	+	-475.483	-0.394919
chrI	624433	625169	CBG00321_624433_625169	+	-192.251	-0.261211
chrI	625361	625856	CBG00321_625361_625856	+	-164.067	-0.331448
chrI	626123	626692	CBG00321_626123_626692	+	-190.041	-0.333991
chrI	627235	628620	CBG00321_627235_628620	+	-547.495	-0.395303
chrI	628800	629279	CBG00321_628800_629279	+	-133.012	-0.277687
chrI	629528	630641	CBG00321_629528_630641	+	-362.157	-0.325388
chrI	630770	631472	CBG00321_630770_631472	+	-274.993	-0.391728
chrI	631584	631752	CBG00321_631584_631752	+	-58.584	-0.348714
chrI	632195	632905	CBG00321_632195_632905	+	-319.032	-0.449341
chrI	633107	633485	CBG00321_633107_633485	+	-123.673	-0.327177
chrI	633757	634544	CBG00321_633757_634544	+	-313.235	-0.398011
chrI	634724	635298	CBG00321_634724_635298	+	-195.29	-0.340226
chrI	637264	638057	CBG00321_637264_638057	+	-338.793	-0.42723
chrI	638307	638904	CBG00321_638307_638904	+	-200.192	-0.33533
chrI	639024	640030	CBG00321_639024_640030	+	-345.65	-0.343588
chrI	640774	641042	CBG25168_640774_641042	+	-90.121	-0.336272
chrI	641152	641900	CBG25168_641152_641900	+	-318.698	-0.426067
chrI	642179	642449	CBG25168_642179_642449	+	-115.58	-0.428074
chrI	642574	642627	CBG25168_642574_642627	+	-18.14	-0.342264
chrI	642838	643450	CBG25168_642838_643450	+	-262.747	-0.429325
chrI	643605	643903	CBG25168_643605_643903	+	-162.044	-0.543772
chrI	652698	652745	CBG00322_652698_652745	+	-12.18	-0.259149
chrI	652853	653243	CBG00322_652853_653243	+	-135.323	-0.346982
chrI	669094	669853	CBG19439_669094_669853	+	-340.02	-0.447984
chrI	669985	670260	CBG19439_669985_670260	+	-56.625	-0.205909
chrI	670370	670421	CBG19439_670370_670421	+	-9.963	-0.195353
chrI	670514	670562	CBG19439_670514_670562	+	-13.931	-0.290229
chrI	671250	671784	CBG19440_671250_671784	-	-190.616	-0.356959
chrI	672316	672563	CBG19440_672316_672563	-	-104.888	-0.424648
chrI	672893	673136	CBG19440_672893_673136	-	-114.632	-0.471737
chrI	673397	674142	CBG19440_673397_674142	-	-313.269	-0.420495
chrI	674987	675612	CBG19440_674987_675612	-	-259.191	-0.414706
chrI	675681	675835	CBG19440_675681_675835	-	-38.925	-0.25276
chrI	676079	676552	CBG19440_676079_676552	-	-133.005	-0.281195
chrI	676665	676928	CBG19440_676665_676928	-	-85.311	-0.324376
chrI	677183	677818	CBG19440_677183_677818	-	-214.732	-0.338161
chrI	677971	678935	CBG19440_677971_678935	-	-445.607	-0.462248
chrI	685307	686130	CBG19441_685307_686130	+	-360.065	-0.437503
chrI	686346	686581	CBG19441_686346_686581	+	-74.907	-0.318753
chrI	686659	687659	CBG19441_686659_687659	+	-388.715	-0.388715
chrI	687905	688730	CBG19441_687905_688730	+	-269.881	-0.327128
chrI	688915	689224	CBG19441_688915_689224	+	-140.932	-0.456091
chrI	689457	690573	CBG19441_689457_690573	+	-631.089	-0.565492
chrI	691023	691800	CBG19441_691023_691800	+	-405.219	-0.521517
chrI	691957	693407	CBG19441_691957_693407	+	-580.824	-0.400568
chrI	693608	694038	CBG19441_693608_694038	+	-161.75	-0.376163
chrI	694118	694656	CBG19441_694118_694656	+	-151.709	-0.281987
chrI	694865	697143	CBG19441_694865_697143	+	-910.011	-0.399478
chrI	713865	714088	CBG26614_713865_714088	-	-85.691	-0.384265
chrI	737893	737937	CBG19445_737893_737937	+	-13.65	-0.310227
chrI	738050	738101	CBG19445_738050_738101	+	-8.881	-0.174137
chrI	738675	739001	CBG19445_738675_739001	+	-123.474	-0.378755
chrI	739319	739364	CBG19445_739319_739364	+	-6.985	-0.155222
chrI	740797	740844	CBG19446_740797_740844	+	-6.846	-0.14566
chrI	741504	741556	CBG26615_741504_741556	-	-8.268	-0.159
chrI	741628	741678	CBG26615_741628_741678	-	-11.44	-0.2288
chrI	741831	742056	CBG26615_741831_742056	-	-79.692	-0.354187
chrI	742163	742387	CBG26615_742163_742387	-	-64.332	-0.287196
chrI	744052	744341	CBG19448_744052_744341	-	-115.332	-0.399073
chrI	744792	745088	CBG19448_744792_745088	-	-109.698	-0.370601
chrI	745754	745804	CBG19448_745754_745804	-	-15.71	-0.3142
chrI	745987	746036	CBG19448_745987_746036	-	-10.559	-0.21549
chrI	746308	746658	CBG19448_746308_746658	-	-161.773	-0.462209
chrI	746860	746907	CBG19448_746860_746907	-	-9.12	-0.194043
chrI	747368	747415	CBG19448_747368_747415	-	-4.229	-0.089979
chrI	750507	750984	CBG19448_750507_750984	-	-217.791	-0.456585
chrI	751530	751585	CBG19448_751530_751585	-	-12.862	-0.233855
chrI	751855	752747	CBG19448_751855_752747	-	-411.584	-0.461417
chrI	752939	753114	CBG19448_752939_753114	-	-50.022	-0.28584
chrI	753501	753892	CBG19448_753501_753892	-	-159.766	-0.408609
chrI	754279	755501	CBG19448_754279_755501	-	-466.724	-0.381935
chrI	755660	755987	CBG19448_755660_755987	-	-123.595	-0.377966
chrI	756138	758729	CBG19448_756138_758729	-	-881.131	-0.340074
chrI	759109	761057	CBG19450_759109_761057	+	-784.319	-0.402628
chrI	761638	762313	CBG19450_761638_762313	+	-282.63	-0.418711
chrI	762676	763422	CBG19450_762676_763422	+	-345.925	-0.463706
chrI	763723	763834	CBG19450_763723_763834	+	-31.634	-0.284991
chrI	767326	768173	CBG19452_767326_768173	+	-328.967	-0.388391
chrI	768266	768315	CBG19452_768266_768315	+	-5.22	-0.106531
chrI	768487	768748	CBG19452_768487_768748	+	-141.943	-0.543843
chrI	768881	769076	CBG19452_768881_769076	+	-64.217	-0.329318
chrI	769408	769606	CBG19452_769408_769606	+	-76.393	-0.385823
chrI	769727	769773	CBG19452_769727_769773	+	-5.279	-0.114761
chrI	770081	770254	CBG19452_770081_770254	+	-74.683	-0.431694
chrI	770484	770725	CBG19452_770484_770725	+	-88.677	-0.367954
chrI	770809	771186	CBG19452_770809_771186	+	-129.209	-0.342729
chrI	771376	771535	CBG19452_771376_771535	+	-71.798	-0.45156
chrI	772783	772957	CBG19453_772783_772957	-	-74.918	-0.430563
chrI	773183	773470	CBG19453_773183_773470	-	-117.747	-0.410268
chrI	773825	773868	CBG19453_773825_773868	-	-10.317	-0.23993
chrI	774009	774056	CBG19453_774009_774056	-	-6.654	-0.141574
chrI	774225	774663	CBG19453_774225_774663	-	-141.196	-0.322365
chrI	774855	775017	CBG19453_774855_775017	-	-49.056	-0.302815
chrI	775081	775323	CBG19453_775081_775323	-	-69.088	-0.285488
chrI	775570	775617	CBG19453_775570_775617	-	-7.127	-0.151638
chrI	775914	775999	CBG19453_775914_775999	-	-21.667	-0.254906
chrI	776081	777843	CBG19453_776081_777843	-	-716.185	-0.406461
chrI	780783	781027	CBG26616_780783_781027	-	-57.799	-0.236881
chrI	781028	781330	CBG19455_781028_781330	+	-131.726	-0.436179
chrI	781085	781518	CBG26616_781085_781518	-	-174.294	-0.402527
chrI	781394	781437	CBG19455_781394_781437	+	-13.524	-0.314512
chrI	782009	785163	CBG19456_782009_785163	+	-1324.92	-0.420076
chrI	785455	785777	CBG26617_785455_785777	-	-101.006	-0.313683
chrI	791720	791861	CBG26618_791720_791861	-	-50.61	-0.358936
chrI	791950	792047	CBG26618_791950_792047	-	-26.989	-0.278237
chrI	794732	795812	CBG26619_794732_795812	-	-351.779	-0.325721
chrI	795924	795971	CBG26619_795924_795971	-	-5.494	-0.116894
chrI	808139	808189	CBG19464_808139_808189	-	-11.1	-0.222
chrI	808270	808316	CBG19464_808270_808316	-	-10.666	-0.23187
chrI	808582	809471	CBG19464_808582_809471	-	-352.039	-0.395994
chrI	809557	809622	CBG19464_809557_809622	-	-19.888	-0.305969
chrI	809703	809769	CBG19464_809703_809769	-	-18.342	-0.277909
chrI	809794	810009	CBG19464_809794_810009	-	-73.556	-0.342121
chrI	810075	811364	CBG19464_810075_811364	-	-493.25	-0.382661
chrI	812660	813513	CBG19465_812660_813513	-	-308.848	-0.362073
chrI	814357	815084	CBG19465_814357_815084	-	-257.865	-0.354697
chrI	815206	815481	CBG19465_815206_815481	-	-94.78	-0.344655
chrI	815619	815808	CBG19465_815619_815808	-	-82.73	-0.437725
chrI	815964	822409	CBG19465_815964_822409	-	-2515.7	-0.390334
chrI	825976	826237	CBG19467_825976_826237	-	-69.049	-0.264556
chrI	827646	827850	CBG19468_827646_827850	+	-58.85	-0.28848
chrI	830379	831169	CBG19469_830379_831169	-	-258.082	-0.326686
chrI	831367	831446	CBG19469_831367_831446	-	-24.188	-0.306177
chrI	834568	835881	CBG19469_834568_835881	-	-463.384	-0.35292
chrI	836162	837252	CBG19469_836162_837252	-	-389.755	-0.357573
chrI	837805	838605	CBG19469_837805_838605	-	-292.189	-0.365236
chrI	839441	840678	CBG19469_839441_840678	-	-507.62	-0.410364
chrI	840822	840881	CBG19469_840822_840881	-	-14.961	-0.253576
chrI	842280	842328	CBG19470_842280_842328	+	-6.039	-0.125813
chrI	842445	843246	CBG19470_842445_843246	+	-298.065	-0.372116
chrI	843525	844178	CBG19470_843525_844178	+	-227.367	-0.348188
chrI	844306	844350	CBG19470_844306_844350	+	-6.696	-0.152182
chrI	844702	845216	CBG19470_844702_845216	+	-182.338	-0.354743
chrI	845387	845441	CBG19470_845387_845441	+	-21.346	-0.395296
chrI	845581	846979	CBG19470_845581_846979	+	-933.627	-0.66783
chrI	849081	849248	CBG19471_849081_849248	-	-77.153	-0.461994
chrI	849584	850455	CBG19471_849584_850455	-	-334.652	-0.384216
chrI	850810	851573	CBG19471_850810_851573	-	-287.167	-0.376366
chrI	854335	855989	CBG19471_854335_855989	-	-658.653	-0.398218
chrI	856129	856917	CBG19471_856129_856917	-	-308.309	-0.391255
chrI	867026	867916	CBG19472_867026_867916	-	-328.595	-0.369208
chrI	868181	868837	CBG19472_868181_868837	-	-228.127	-0.347755
chrI	871965	872594	CBG19472_871965_872594	-	-211.319	-0.33596
chrI	874505	874656	CBG19473_874505_874656	+	-41.431	-0.274377
chrI	881976	882688	CBG19475_881976_882688	-	-224.958	-0.315952
chrI	882812	882946	CBG19475_882812_882946	-	-46.892	-0.34994
chrI	883056	883105	CBG19475_883056_883105	-	-9.37	-0.191224
chrI	885348	885831	CBG19476_885348_885831	+	-160.84	-0.333002
chrI	888645	890300	CBG19477_888645_890300	+	-683.278	-0.412857
chrI	890445	890507	CBG19477_890445_890507	+	-15.786	-0.254613
chrI	891892	892165	CBG19477_891892_892165	+	-96.837	-0.354714
chrI	892271	892692	CBG19477_892271_892692	+	-192.413	-0.457038
chrI	893798	894181	CBG19478_893798_894181	+	-132.283	-0.345386
chrI	894232	894656	CBG19478_894232_894656	+	-179.192	-0.422623
chrI	894930	896425	CBG19478_894930_896425	+	-692.141	-0.462971
chrI	896530	896654	CBG19478_896530_896654	+	-10.466	-0.084403
chrI	896722	896898	CBG19478_896722_896898	+	-55.886	-0.317534
chrI	897177	897231	CBG19478_897177_897231	+	-8.838	-0.163667
chrI	897369	898223	CBG19478_897369_898223	+	-365.364	-0.427827
chrI	898500	898859	CBG19478_898500_898859	+	-178.635	-0.497591
chrI	899020	899500	CBG19478_899020_899500	+	-192.767	-0.401598
chrI	899612	899722	CBG19478_899612_899722	+	-24.718	-0.224709
chrI	899952	900132	CBG19478_899952_900132	+	-58.421	-0.324561
chrI	900298	901059	CBG19478_900298_901059	+	-227.811	-0.299357
chrI	901130	901939	CBG19478_901130_901939	+	-255.787	-0.316177
chrI	903223	903271	CBG19479_903223_903271	-	-13.315	-0.277396
chrI	903995	904041	CBG19479_903995_904041	-	-7.087	-0.154065
chrI	904101	904164	CBG19479_904101_904164	-	-20.259	-0.321571
chrI	905041	905083	CBG19480_905041_905083	+	-11.292	-0.268857
chrI	905215	906269	CBG19480_905215_906269	+	-353.925	-0.335792
chrI	908560	908608	CBG19481_908560_908608	-	-13.315	-0.277396
chrI	909746	909791	CBG19481_909746_909791	-	-7.183	-0.159622
chrI	909851	909914	CBG19481_909851_909914	-	-20.409	-0.323952
chrI	918228	918305	CBG16931_918228_918305	+	-21.103	-0.274065
chrI	919175	919550	CBG16932_919175_919550	-	-130.584	-0.348224
chrI	919719	919771	CBG16932_919719_919771	-	-13.263	-0.255058
chrI	924003	924117	CBG25153_924003_924117	-	-36.702	-0.321947
chrI	929827	930163	CBG16933_929827_930163	-	-144.723	-0.430723
chrI	930350	930535	CBG16933_930350_930535	-	-64.92	-0.350919
chrI	932559	933549	CBG16933_932559_933549	-	-463.154	-0.467832
chrI	933741	934689	CBG16933_933741_934689	-	-332.287	-0.350514
chrI	934804	934856	CBG16933_934804_934856	-	-11.418	-0.219577
chrI	935193	936475	CBG16933_935193_936475	-	-543.196	-0.42371
chrI	936722	937147	CBG16933_936722_937147	-	-167.218	-0.393454
chrI	937399	937919	CBG16933_937399_937919	-	-229.246	-0.440858
chrI	938328	939939	CBG16933_938328_939939	-	-696.901	-0.432589
chrI	947758	948016	CBG26827_947758_948016	-	-85.428	-0.331116
chrI	949057	949634	CBG16935_949057_949634	-	-269.26	-0.466655
chrI	949825	950033	CBG16935_949825_950033	-	-69.275	-0.333053
chrI	950116	950659	CBG16935_950116_950659	-	-187.026	-0.344431
chrI	950768	951511	CBG16935_950768_951511	-	-381.1	-0.512921
chrI	953003	953877	CBG16935_953003_953877	-	-321.376	-0.367707
chrI	953959	954327	CBG16935_953959_954327	-	-92.145	-0.250394
chrI	961840	962190	CBG16936_961840_962190	+	-141.634	-0.404669
chrI	962541	963094	CBG16936_962541_963094	+	-239.217	-0.43258
chrI	963472	963523	CBG16936_963472_963523	+	-17.377	-0.340725
chrI	963828	964358	CBG16936_963828_964358	+	-204.56	-0.385962
chrI	964538	965346	CBG16936_964538_965346	+	-318.887	-0.394662
chrI	965533	965575	CBG16936_965533_965575	+	-5.531	-0.13169
chrI	965671	965712	CBG16936_965671_965712	+	-6.593	-0.160805
chrI	965939	966424	CBG16936_965939_966424	+	-121.26	-0.250021
chrI	966634	966676	CBG16936_966634_966676	+	-10.309	-0.245452
chrI	966712	966835	CBG16936_966712_966835	+	-35.883	-0.291732
chrI	967054	967371	CBG16936_967054_967371	+	-92.612	-0.292151
chrI	967581	967667	CBG16936_967581_967667	+	-18.731	-0.217802
chrI	967807	967866	CBG16936_967807_967866	+	-20.437	-0.34639
chrI	967885	968312	CBG16936_967885_968312	+	-123.499	-0.289225
chrI	968522	968587	CBG16936_968522_968587	+	-24.453	-0.3762
chrI	968864	968906	CBG16936_968864_968906	+	-5.906	-0.140619
chrI	969182	969228	CBG16936_969182_969228	+	-12.519	-0.272152
chrI	969503	969662	CBG16936_969503_969662	+	-49.187	-0.309352
chrI	969882	970604	CBG16936_969882_970604	+	-298.616	-0.413596
chrI	970733	970953	CBG16936_970733_970953	+	-52.734	-0.2397
chrI	973235	973494	CBG16937_973235_973494	+	-77.502	-0.299236
chrI	973562	973607	CBG16937_973562_973607	+	-13.586	-0.301911
chrI	973680	974293	CBG16937_973680_974293	+	-287.095	-0.468344
chrI	974742	976390	CBG16937_974742_976390	+	-878.961	-0.53335
chrI	981195	981803	CBG16939_981195_981803	-	-344.931	-0.567321
chrI	982026	982088	CBG16939_982026_982088	-	-17.434	-0.281194
chrI	984533	984696	CBG16939_984533_984696	-	-33.799	-0.207356
chrI	985179	986318	CBG16939_985179_986318	-	-502.158	-0.440876
chrI	986864	987386	CBG16939_986864_987386	-	-290.191	-0.555921
chrI	987529	988364	CBG16939_987529_988364	-	-417.566	-0.500079
chrI	988827	989440	CBG16940_988827_989440	-	-190.264	-0.310382
chrI	989760	989825	CBG16940_989760_989825	-	-22.439	-0.345215
chrI	990062	990772	CBG16940_990062_990772	-	-202.326	-0.284966
chrI	991078	991125	CBG16940_991078_991125	-	-9.923	-0.211128
chrI	993488	993535	CBG16942_993488_993535	+	-9.923	-0.211128
chrI	993847	993895	CBG16942_993847_993895	+	-7.785	-0.162188
chrI	996469	996533	CBG16944_996469_996533	-	-18.76	-0.293125
chrI	997614	997662	CBG16944_997614_997662	-	-9.181	-0.191271
chrI	997957	998018	CBG16944_997957_998018	-	-7.302	-0.119705
chrI	998485	998865	CBG16945_998485_998865	+	-118.224	-0.311116
chrI	999080	999135	CBG16945_999080_999135	+	-17.89	-0.325273
chrI	999667	999722	CBG16945_999667_999722	+	-6.4	-0.116364
chrI	1001226	1001272	CBG16945_1001226_1001272	+	-5.406	-0.117522
chrI	1008699	1009094	CBG16947_1008699_1009094	+	-168.227	-0.425891
chrI	1009210	1016064	CBG16947_1009210_1016064	+	-2721.8	-0.397111
chrI	1018038	1020071	CBG16947_1018038_1020071	+	-756.108	-0.371917
chrI	1020191	1020607	CBG16947_1020191_1020607	+	-174.082	-0.418466
chrI	1021106	1021567	CBG16947_1021106_1021567	+	-146.947	-0.318757
chrI	1022440	1023274	CBG26828_1022440_1023274	-	-362.759	-0.434963
chrI	1023955	1024169	CBG26828_1023955_1024169	-	-92.751	-0.433416
chrI	1028016	1028207	CBG26829_1028016_1028207	-	-49.593	-0.259649
chrI	1028298	1028429	CBG26829_1028298_1028429	-	-30.526	-0.233023
chrI	1028487	1029239	CBG26829_1028487_1029239	-	-258.322	-0.343513
chrI	1034156	1038215	CBG16950_1034156_1038215	+	-1574.76	-0.387967
chrI	1038339	1042928	CBG16950_1038339_1042928	+	-1603.54	-0.349431
chrI	1051498	1052885	CBG16951_1051498_1052885	+	-464.921	-0.335199
chrI	1053005	1054041	CBG16951_1053005_1054041	+	-453.558	-0.437797
chrI	1054146	1054793	CBG16951_1054146_1054793	+	-195.49	-0.302148
chrI	1059994	1060919	CBG16951_1059994_1060919	+	-336.679	-0.363977
chrI	1069486	1076313	CBG16953_1069486_1076313	+	-2517.03	-0.368688
chrI	1076416	1077223	CBG16953_1076416_1077223	+	-324.068	-0.401571
chrI	1080264	1081079	CBG16954_1080264_1081079	+	-314.8	-0.386258
chrI	1081316	1082201	CBG16954_1081316_1082201	+	-396.77	-0.448328
chrI	1082318	1082578	CBG16954_1082318_1082578	+	-89.689	-0.344958
chrI	1096710	1097485	CBG16954_1096710_1097485	+	-178.172	-0.229899
chrI	1099993	1100227	CBG16955_1099993_1100227	-	-93.573	-0.399885
chrI	1100449	1100713	CBG16955_1100449_1100713	-	-97.518	-0.369386
chrI	1100865	1101334	CBG16955_1100865_1101334	-	-176.885	-0.377154
chrI	1103051	1103621	CBG16956_1103051_1103621	+	-261.838	-0.459365
chrI	1103966	1105829	CBG16956_1103966_1105829	+	-825.556	-0.443133
chrI	1106019	1106826	CBG16956_1106019_1106826	+	-493.584	-0.611628
chrI	1107050	1107333	CBG16956_1107050_1107333	+	-87.018	-0.307484
chrI	1109776	1110168	CBG29114_1109776_1110168	-	-179.388	-0.457622
chrI	1110765	1111179	CBG29114_1110765_1111179	-	-151.35	-0.36558
chrI	1116919	1118294	CBG18539_1116919_1118294	-	-581.081	-0.422604
chrI	1118427	1118500	CBG18539_1118427_1118500	-	-20.933	-0.286753
chrI	1118658	1118704	CBG18539_1118658_1118704	-	-12.433	-0.270283
chrI	1122762	1123191	CBG18542_1122762_1123191	-	-138.004	-0.321688
chrI	1123447	1124388	CBG18542_1123447_1124388	-	-412.498	-0.438361
chrI	1124612	1124695	CBG18542_1124612_1124695	-	-25.801	-0.310855
chrI	1124744	1125552	CBG18542_1124744_1125552	-	-296.209	-0.366595
chrI	1125635	1125901	CBG18542_1125635_1125901	-	-71.729	-0.269658
chrI	1126212	1126265	CBG18542_1126212_1126265	-	-23.416	-0.441811
chrI	1128287	1128853	CBG18543_1128287_1128853	+	-238.283	-0.420995
chrI	1129190	1129337	CBG18543_1129190_1129337	+	-67.478	-0.459034
chrI	1129954	1130622	CBG18543_1129954_1130622	+	-323.669	-0.484534
chrI	1130855	1131564	CBG18543_1130855_1131564	+	-316.814	-0.446846
chrI	1133512	1133685	CBG18544_1133512_1133685	-	-54.491	-0.314977
chrI	1133779	1134814	CBG18544_1133779_1134814	-	-468.971	-0.453112
chrI	1135940	1137454	CBG18544_1135940_1137454	-	-709.281	-0.468482
chrI	1137663	1138763	CBG18544_1137663_1138763	-	-480.853	-0.437139
chrI	1138865	1138988	CBG18544_1138865_1138988	-	-32.173	-0.261569
chrI	1139040	1139106	CBG18544_1139040_1139106	-	-17.436	-0.264182
chrI	1139160	1141760	CBG18544_1139160_1141760	-	-1045.83	-0.402242
chrI	1141840	1143020	CBG18544_1141840_1143020	-	-420.153	-0.356062
chrI	1143113	1148870	CBG18544_1143113_1148870	-	-2763.36	-0.48
chrI	1156539	1157949	CBG18546_1156539_1157949	+	-612.112	-0.434122
chrI	1158146	1159516	CBG18546_1158146_1159516	+	-461.581	-0.33692
chrI	1159713	1160452	CBG18546_1159713_1160452	+	-377.607	-0.51097
chrI	1160808	1161018	CBG18547_1160808_1161018	-	-63.673	-0.303205
chrI	1161088	1161173	CBG18547_1161088_1161173	-	-21.036	-0.247482
chrI	1162492	1162665	CBG18547_1162492_1162665	-	-55.564	-0.321179
chrI	1162764	1162815	CBG18547_1162764_1162815	-	-11.522	-0.225922
chrI	1162909	1163700	CBG18547_1162909_1163700	-	-266.061	-0.33636
chrI	1163780	1164513	CBG18547_1163780_1164513	-	-189.28	-0.258226
chrI	1164696	1165941	CBG18547_1164696_1165941	-	-461.407	-0.370608
chrI	1166069	1166123	CBG18547_1166069_1166123	-	-15.739	-0.291463
chrI	1166281	1166367	CBG18547_1166281_1166367	-	-22.608	-0.262884
chrI	1169887	1171054	CBG18548_1169887_1171054	+	-428.437	-0.367127
chrI	1171225	1171933	CBG18548_1171225_1171933	+	-268.298	-0.378952
chrI	1172121	1172636	CBG18548_1172121_1172636	+	-116.21	-0.22565
chrI	1172724	1172870	CBG18548_1172724_1172870	+	-55.014	-0.376808
chrI	1172947	1173583	CBG18548_1172947_1173583	+	-226.542	-0.356198
chrI	1173713	1174391	CBG18548_1173713_1174391	+	-224.135	-0.330583
chrI	1174625	1175604	CBG18548_1174625_1175604	+	-501.139	-0.511889
chrI	1177512	1178977	CBG18549_1177512_1178977	+	-548.515	-0.374413
chrI	1179079	1179493	CBG18549_1179079_1179493	+	-112.942	-0.272807
chrI	1179570	1179629	CBG18549_1179570_1179629	+	-11.852	-0.200881
chrI	1179790	1180941	CBG18549_1179790_1180941	+	-456.256	-0.3964
chrI	1183844	1184388	CBG18550_1183844_1184388	-	-249.277	-0.45823
chrI	1184519	1185625	CBG18550_1184519_1185625	-	-466.434	-0.421731
chrI	1185737	1185794	CBG18550_1185737_1185794	-	-23.14	-0.405965
chrI	1185890	1186583	CBG18550_1185890_1186583	-	-233.631	-0.33713
chrI	1186787	1187763	CBG18550_1186787_1187763	-	-376.223	-0.385474
chrI	1188556	1189361	CBG18550_1188556_1189361	-	-247.263	-0.307159
chrI	1189708	1190987	CBG18550_1189708_1190987	-	-323.285	-0.252764
chrI	1191169	1191218	CBG18550_1191169_1191218	-	-17.232	-0.351673
chrI	1191324	1191367	CBG18550_1191324_1191367	-	-10.699	-0.248814
chrI	1191440	1191515	CBG18550_1191440_1191515	-	-22.971	-0.30628
chrI	1191593	1191638	CBG18550_1191593_1191638	-	-12.833	-0.285178
chrI	1202275	1202705	CBG18552_1202275_1202705	+	-150.913	-0.35096
chrI	1202765	1202880	CBG18552_1202765_1202880	+	-25.502	-0.221757
chrI	1202941	1203169	CBG18552_1202941_1203169	+	-66.679	-0.292452
chrI	1203311	1204134	CBG18552_1203311_1204134	+	-335.948	-0.408199
chrI	1204407	1205198	CBG18552_1204407_1205198	+	-301.214	-0.380802
chrI	1205498	1205863	CBG18552_1205498_1205863	+	-161.602	-0.442745
chrI	1206046	1206463	CBG18552_1206046_1206463	+	-134.829	-0.323331
chrI	1206608	1206651	CBG18552_1206608_1206651	+	-11.65	-0.27093
chrI	1206780	1207634	CBG18552_1206780_1207634	+	-263.868	-0.308979
chrI	1208071	1208849	CBG18553_1208071_1208849	-	-374.8	-0.481748
chrI	1209212	1210566	CBG18553_1209212_1210566	-	-440.321	-0.3252
chrI	1210928	1211061	CBG18553_1210928_1211061	-	-38.401	-0.288729
chrI	1211329	1212165	CBG18553_1211329_1212165	-	-257.983	-0.308592
chrI	1213166	1213331	CBG18553_1213166_1213331	-	-47.642	-0.288739
chrI	1213502	1213769	CBG18553_1213502_1213769	-	-102.272	-0.383041
chrI	1216575	1216618	CBG18554_1216575_1216618	-	-5.285	-0.122907
chrI	1218802	1219317	CBG18556_1218802_1219317	+	-116.21	-0.22565
chrI	1219405	1219551	CBG18556_1219405_1219551	+	-55.014	-0.376808
chrI	1219626	1221072	CBG18556_1219626_1221072	+	-531.354	-0.367465
chrI	1221306	1222285	CBG18556_1221306_1222285	+	-502.743	-0.513527
chrI	1224258	1224568	CBG18557_1224258_1224568	+	-88.894	-0.286755
chrI	1228425	1228838	CBG18557_1228425_1228838	+	-109.768	-0.265782
chrI	1228915	1228974	CBG18557_1228915_1228974	+	-11.852	-0.200881
chrI	1232917	1232970	CBG05161_1232917_1232970	-	-21.254	-0.401019
chrI	1233067	1233694	CBG05161_1233067_1233694	-	-239.433	-0.381871
chrI	1233982	1234475	CBG05161_1233982_1234475	-	-192.07	-0.389594
chrI	1234587	1236643	CBG05161_1234587_1236643	-	-833.619	-0.405457
chrI	1236865	1237019	CBG05161_1236865_1237019	-	-58.725	-0.381331
chrI	1241893	1242041	CBG05160_1241893_1242041	-	-57.659	-0.389588
chrI	1242216	1243350	CBG05160_1242216_1243350	-	-393.072	-0.346624
chrI	1243427	1243702	CBG05160_1243427_1243702	-	-71.57	-0.260255
chrI	1243817	1243869	CBG05160_1243817_1243869	-	-16.563	-0.318519
chrI	1243989	1245826	CBG05160_1243989_1245826	-	-800.353	-0.435685
chrI	1245867	1246393	CBG05160_1245867_1246393	-	-204.721	-0.389203
chrI	1246599	1247142	CBG05160_1246599_1247142	-	-179.766	-0.331061
chrI	1254615	1254810	CBG05159_1254615_1254810	+	-47.943	-0.245862
chrI	1256044	1256561	CBG05158_1256044_1256561	-	-168.857	-0.326609
chrI	1256579	1257132	CBG05158_1256579_1257132	-	-226.851	-0.410219
chrI	1257407	1258386	CBG05158_1257407_1258386	-	-373.228	-0.381234
chrI	1258672	1259259	CBG05158_1258672_1259259	-	-270.262	-0.460412
chrI	1259400	1259521	CBG05158_1259400_1259521	-	-38.621	-0.319182
chrI	1259597	1259775	CBG05158_1259597_1259775	-	-60.155	-0.337949
chrI	1259912	1261748	CBG05158_1259912_1261748	-	-683.5	-0.372277
chrI	1261830	1262299	CBG05158_1261830_1262299	-	-154.612	-0.329663
chrI	1270489	1271001	CBG05156_1270489_1271001	+	-222.186	-0.433957
chrI	1271269	1271653	CBG05156_1271269_1271653	+	-162.34	-0.42276
chrI	1271790	1272067	CBG05156_1271790_1272067	+	-82.088	-0.296347
chrI	1272224	1273639	CBG05156_1272224_1273639	+	-784.682	-0.554546
chrI	1273903	1274027	CBG05156_1273903_1274027	+	-42.8	-0.345161
chrI	1274042	1275428	CBG05156_1274042_1275428	+	-543.294	-0.391987
chrI	1275476	1275591	CBG05156_1275476_1275591	+	-38.215	-0.332304
chrI	1276186	1276292	CBG05156_1276186_1276292	+	-42.368	-0.399698
chrI	1276946	1277216	CBG05155_1276946_1277216	-	-83.994	-0.311089
chrI	1277468	1277559	CBG05155_1277468_1277559	-	-20.98	-0.230549
chrI	1277923	1278063	CBG05155_1277923_1278063	-	-52.994	-0.378529
chrI	1278170	1278352	CBG05155_1278170_1278352	-	-61.546	-0.338165
chrI	1278559	1278774	CBG05155_1278559_1278774	-	-74.357	-0.345847
chrI	1278887	1278936	CBG05155_1278887_1278936	-	-9.62	-0.196327
chrI	1279048	1279094	CBG05155_1279048_1279094	-	-14.607	-0.317543
chrI	1279193	1279243	CBG05155_1279193_1279243	-	-11.237	-0.22474
chrI	1279424	1280250	CBG05155_1279424_1280250	-	-218.147	-0.2641
chrI	1280331	1280388	CBG05155_1280331_1280388	-	-12.746	-0.223614
chrI	1280502	1280571	CBG05155_1280502_1280571	-	-16.572	-0.240174
chrI	1280706	1280747	CBG05155_1280706_1280747	-	-3.135	-0.076463
chrI	1283724	1283775	CBG25171_1283724_1283775	+	-16.799	-0.329392
chrI	1285462	1286259	CBG05152_1285462_1286259	+	-294.205	-0.369141
chrI	1286428	1286475	CBG05152_1286428_1286475	+	-12.693	-0.270064
chrI	1286633	1287427	CBG05152_1286633_1287427	+	-261.717	-0.329618
chrI	1287702	1288489	CBG05152_1287702_1288489	+	-305.673	-0.388403
chrI	1288745	1289260	CBG05152_1288745_1289260	+	-144.012	-0.279635
chrI	1289487	1289670	CBG05152_1289487_1289670	+	-54.427	-0.297415
chrI	1289896	1290049	CBG05152_1289896_1290049	+	-41.909	-0.273915
chrI	1291899	1292483	CBG05152_1291899_1292483	+	-233.06	-0.399075
chrI	1292583	1292683	CBG05152_1292583_1292683	+	-25.019	-0.25019
chrI	1293249	1293758	CBG05152_1293249_1293758	+	-260.611	-0.512006
chrI	1294296	1294409	CBG05152_1294296_1294409	+	-27.933	-0.247195
chrI	1294781	1295545	CBG05152_1294781_1295545	+	-426.788	-0.558623
chrI	1295802	1296514	CBG05152_1295802_1296514	+	-333.03	-0.467739
chrI	1296622	1296785	CBG05152_1296622_1296785	+	-54.792	-0.336147
chrI	1300624	1300872	CBG05151_1300624_1300872	+	-66.552	-0.268355
chrI	1302364	1303378	CBG05150_1302364_1303378	+	-359.557	-0.354593
chrI	1303715	1305126	CBG05150_1303715_1305126	+	-808.67	-0.573118
chrI	1305214	1305286	CBG05150_1305214_1305286	+	-20.676	-0.287167
chrI	1306850	1307032	CBG05149_1306850_1307032	-	-68.758	-0.377791
chrI	1307254	1307878	CBG05149_1307254_1307878	-	-249.625	-0.40004
chrI	1308030	1308539	CBG05149_1308030_1308539	-	-139.471	-0.27401
chrI	1308656	1308810	CBG05149_1308656_1308810	-	-46.073	-0.299175
chrI	1310557	1311846	CBG05148_1310557_1311846	-	-427.482	-0.331638
chrI	1312602	1313829	CBG05147_1312602_1313829	-	-435.261	-0.354736
chrI	1314111	1315478	CBG05147_1314111_1315478	-	-843.248	-0.61686
chrI	1315619	1315804	CBG05147_1315619_1315804	-	-71.079	-0.384211
chrI	1315897	1316252	CBG05147_1315897_1316252	-	-195.801	-0.551552
chrI	1316360	1317286	CBG05147_1316360_1317286	-	-383.209	-0.413833
chrI	1317575	1318031	CBG05147_1317575_1318031	-	-143.095	-0.313805
chrI	1318811	1319728	CBG05145_1318811_1319728	-	-299.306	-0.326397
chrI	1319905	1320025	CBG05145_1319905_1320025	-	-41.149	-0.342908
chrI	1320520	1321240	CBG05145_1320520_1321240	-	-294.549	-0.409096
chrI	1322721	1322772	CBG05144_1322721_1322772	+	-12.083	-0.236922
chrI	1322860	1322911	CBG05144_1322860_1322911	+	-9.548	-0.187216
chrI	1323064	1323123	CBG05144_1323064_1323123	+	-14.528	-0.246237
chrI	1323271	1323325	CBG05144_1323271_1323325	+	-12.73	-0.235741
chrI	1332686	1332738	CBG25172_1332686_1332738	-	-9.306	-0.178962
chrI	1333270	1334050	CBG05143_1333270_1334050	+	-347.509	-0.445524
chrI	1334318	1334402	CBG05143_1334318_1334402	+	-19.994	-0.238024
chrI	1334695	1335236	CBG05143_1334695_1335236	+	-228.749	-0.422826
chrI	1335392	1335966	CBG05143_1335392_1335966	+	-263.812	-0.459603
chrI	1336352	1337201	CBG05143_1336352_1337201	+	-342.318	-0.403201
chrI	1339225	1339938	CBG05142_1339225_1339938	+	-238.415	-0.334383
chrI	1340152	1340773	CBG05142_1340152_1340773	+	-255.893	-0.412066
chrI	1340952	1340997	CBG05142_1340952_1340997	+	-9.042	-0.200933
chrI	1341011	1342140	CBG05142_1341011_1342140	+	-413.898	-0.366606
chrI	1342316	1342532	CBG05142_1342316_1342532	+	-89.789	-0.41569
chrI	1342652	1343438	CBG05142_1342652_1343438	+	-265.999	-0.338421
chrI	1344158	1345478	CBG05141_1344158_1345478	-	-556.596	-0.421664
chrI	1346895	1347693	CBG05139_1346895_1347693	-	-309.086	-0.387326
chrI	1347783	1347913	CBG05139_1347783_1347913	-	-41.799	-0.321531
chrI	1348166	1348879	CBG05139_1348166_1348879	-	-253.105	-0.354986
chrI	1353759	1354611	CBG05139_1353759_1354611	-	-334.204	-0.392258
chrI	1354726	1356071	CBG05139_1354726_1356071	-	-511.053	-0.379965
chrI	1359233	1359363	CBG05139_1359233_1359363	-	-41.799	-0.321531
chrI	1359616	1360329	CBG05139_1359616_1360329	-	-253.105	-0.354986
chrI	1362606	1363458	CBG05139_1362606_1363458	-	-334.204	-0.392258
chrI	1363573	1364918	CBG05139_1363573_1364918	-	-513.774	-0.381988
chrI	1365601	1366423	CBG05139_1365601_1366423	-	-320.44	-0.38983
chrI	1366645	1369007	CBG05139_1366645_1369007	-	-881.718	-0.373293
chrI	1369160	1369308	CBG05139_1369160_1369308	-	-40.284	-0.272189
chrI	1369573	1373589	CBG05139_1369573_1373589	-	-1585.24	-0.394731
chrI	1373788	1375858	CBG05139_1373788_1375858	-	-715.555	-0.345679
chrI	1376778	1377072	CBG25173_1376778_1377072	-	-104.643	-0.355929
chrI	1390816	1391094	CBG25174_1390816_1391094	-	-92.494	-0.332712
chrI	1391284	1391682	CBG25174_1391284_1391682	-	-135.002	-0.339201
chrI	1391942	1392185	CBG25174_1391942_1392185	-	-85.405	-0.351461
chrI	1392272	1392381	CBG25174_1392272_1392381	-	-36.343	-0.333422
chrI	1417576	1418024	CBG05131_1417576_1418024	+	-178.112	-0.397571
chrI	1418190	1418248	CBG05131_1418190_1418248	+	-29.907	-0.515638
chrI	1422391	1423177	CBG05130_1422391_1423177	-	-287.427	-0.365683
chrI	1423632	1424316	CBG05130_1423632_1424316	-	-310.797	-0.454382
chrI	1424493	1424742	CBG05130_1424493_1424742	-	-106.39	-0.427269
chrI	1424851	1424908	CBG05130_1424851_1424908	-	-13.627	-0.23907
chrI	1425000	1425652	CBG05130_1425000_1425652	-	-242.207	-0.371483
chrI	1425781	1426377	CBG05130_1425781_1426377	-	-212.649	-0.356794
chrI	1426584	1426636	CBG05130_1426584_1426636	-	-17.529	-0.337096
chrI	1426778	1430867	CBG05130_1426778_1430867	-	-1491.58	-0.364779
chrI	1436760	1437348	CBG05129_1436760_1437348	-	-252.373	-0.429206
chrI	1437431	1437717	CBG05129_1437431_1437717	-	-112.595	-0.393689
chrI	1437804	1438123	CBG05129_1437804_1438123	-	-118.283	-0.370793
chrI	1438205	1438248	CBG05129_1438205_1438248	-	-7.173	-0.166814
chrI	1438311	1439181	CBG05129_1438311_1439181	-	-323.372	-0.371692
chrI	1439267	1439311	CBG05129_1439267_1439311	-	-8.972	-0.203909
chrI	1439437	1439854	CBG05129_1439437_1439854	-	-148.372	-0.355808
chrI	1441869	1442210	CBG05128_1441869_1442210	-	-143.236	-0.420047
chrI	1442476	1442558	CBG05128_1442476_1442558	-	-37.406	-0.456171
chrI	1442895	1443509	CBG05128_1442895_1443509	-	-161.935	-0.263738
chrI	1443582	1443627	CBG05128_1443582_1443627	-	-10.785	-0.239667
chrI	1443698	1444933	CBG05128_1443698_1444933	-	-436.536	-0.35347
chrI	1446535	1448598	CBG25175_1446535_1448598	-	-808.009	-0.391667
chrI	1448673	1448720	CBG25175_1448673_1448720	-	-14.627	-0.311213
chrI	1451344	1451582	CBG05125_1451344_1451582	-	-80.069	-0.336424
chrI	1451918	1452356	CBG05125_1451918_1452356	-	-229.953	-0.525007
chrI	1452668	1453371	CBG05125_1452668_1453371	-	-225.514	-0.320788
chrI	1474386	1474706	CBG05122_1474386_1474706	+	-97.789	-0.305591
chrI	1474923	1475234	CBG05122_1474923_1475234	+	-101.272	-0.325633
chrI	1476382	1476428	CBG05122_1476382_1476428	+	-10.76	-0.233913
chrI	1476528	1476931	CBG05122_1476528_1476931	+	-172.598	-0.428283
chrI	1477342	1477525	CBG05122_1477342_1477525	+	-76.605	-0.418607
chrI	1477711	1478157	CBG05122_1477711_1478157	+	-238.699	-0.5352
chrI	1478266	1478442	CBG05122_1478266_1478442	+	-46.941	-0.26671
chrI	1478644	1478965	CBG05122_1478644_1478965	+	-145.15	-0.452181
chrI	1481869	1482332	CBG05121_1481869_1482332	+	-169.004	-0.365019
chrI	1482425	1483118	CBG05121_1482425_1483118	+	-217.602	-0.314
chrI	1483186	1483235	CBG05121_1483186_1483235	+	-10.767	-0.219735
chrI	1483328	1483730	CBG05121_1483328_1483730	+	-165.095	-0.410684
chrI	1483845	1484263	CBG05121_1483845_1484263	+	-146.861	-0.351342
chrI	1484402	1485306	CBG05121_1484402_1485306	+	-338.295	-0.37422
chrI	1485647	1486074	CBG05121_1485647_1486074	+	-153.401	-0.359253
chrI	1486233	1486542	CBG05121_1486233_1486542	+	-87.888	-0.284427
chrI	1486655	1486703	CBG05121_1486655_1486703	+	-15.488	-0.322667
chrI	1486937	1487022	CBG05121_1486937_1487022	+	-18.408	-0.216565
chrI	1487468	1487750	CBG05121_1487468_1487750	+	-103.721	-0.367805
chrI	1487879	1487922	CBG05121_1487879_1487922	+	-12.024	-0.279628
chrI	1488008	1488058	CBG05121_1488008_1488058	+	-12.824	-0.25648
chrI	1488183	1488227	CBG05121_1488183_1488227	+	-5.273	-0.119841
chrI	1488337	1488461	CBG05121_1488337_1488461	+	-40.401	-0.325815
chrI	1490029	1490589	CBG05120_1490029_1490589	-	-204.783	-0.365684
chrI	1490686	1491277	CBG05120_1490686_1491277	-	-260.388	-0.440589
chrI	1493878	1493920	CBG05119_1493878_1493920	+	-8.101	-0.192881
chrI	1494120	1494658	CBG05119_1494120_1494658	+	-249.38	-0.463532
chrI	1494825	1494868	CBG05119_1494825_1494868	+	-8.734	-0.203116
chrI	1495026	1495633	CBG05119_1495026_1495633	+	-303.556	-0.500092
chrI	1496456	1496667	CBG05118_1496456_1496667	-	-64.506	-0.305716
chrI	1496855	1497010	CBG05118_1496855_1497010	-	-51.62	-0.333032
chrI	1502046	1504136	CBG05117_1502046_1504136	-	-879.685	-0.420902
chrI	1504241	1504421	CBG05117_1504241_1504421	-	-65.142	-0.3619
chrI	1504846	1504968	CBG05117_1504846_1504968	-	-22.103	-0.181172
chrI	1505510	1506791	CBG05117_1505510_1506791	-	-522.94	-0.408228
chrI	1513422	1513650	CBG05116_1513422_1513650	-	-99.236	-0.435246
chrI	1513809	1513852	CBG05116_1513809_1513852	-	-7.334	-0.170558
chrI	1514077	1514371	CBG05116_1514077_1514371	-	-123.071	-0.418609
chrI	1514558	1514606	CBG05116_1514558_1514606	-	-4.067	-0.084729
chrI	1514680	1514726	CBG05116_1514680_1514726	-	-8.583	-0.186587
chrI	1515179	1515296	CBG05116_1515179_1515296	-	-45.597	-0.389718
chrI	1515418	1515656	CBG05116_1515418_1515656	-	-99.459	-0.417895
chrI	1516107	1516152	CBG05116_1516107_1516152	-	-12.856	-0.285689
chrI	1516566	1516998	CBG05116_1516566_1516998	-	-159.278	-0.368699
chrI	1517195	1517247	CBG05116_1517195_1517247	-	-14	-0.269231
chrI	1533046	1533856	CBG05115_1533046_1533856	-	-243.026	-0.300032
chrI	1534078	1534587	CBG05115_1534078_1534587	-	-197.337	-0.387695
chrI	1534848	1534994	CBG05115_1534848_1534994	-	-48.321	-0.330966
chrI	1535315	1535439	CBG05115_1535315_1535439	-	-34.226	-0.276016
chrI	1535922	1537184	CBG05115_1535922_1537184	-	-400.622	-0.31745
chrI	1537388	1538880	CBG05115_1537388_1538880	-	-512.38	-0.343418
chrI	1539122	1539178	CBG05115_1539122_1539178	-	-18.401	-0.328589
chrI	1539436	1539483	CBG05115_1539436_1539483	-	-8.198	-0.174426
chrI	1540464	1540512	CBG05114_1540464_1540512	-	-5.625	-0.117188
chrI	1540920	1540972	CBG05114_1540920_1540972	-	-12.524	-0.240846
chrI	1541932	1541998	CBG05113_1541932_1541998	-	-11.972	-0.181394
chrI	1542105	1542150	CBG05113_1542105_1542150	-	-11.831	-0.262911
chrI	1546761	1547396	CBG05111_1546761_1547396	-	-269.545	-0.42448
chrI	1547896	1547948	CBG05111_1547896_1547948	-	-11.368	-0.218615
chrI	1548088	1548538	CBG05111_1548088_1548538	-	-165.276	-0.36728
chrI	1548667	1550013	CBG05111_1548667_1550013	-	-608.049	-0.451745
chrI	1550103	1551763	CBG05111_1550103_1551763	-	-774.485	-0.466557
chrI	1570895	1571177	CBG05109_1570895_1571177	+	-104.693	-0.371252
chrI	1571409	1572214	CBG05109_1571409_1572214	+	-331.996	-0.412417
chrI	1572647	1572753	CBG05109_1572647_1572753	+	-31.95	-0.301415
chrI	1573336	1573575	CBG05109_1573336_1573575	+	-118.538	-0.495975
chrI	1574185	1574545	CBG05109_1574185_1574545	+	-137.886	-0.383017
chrI	1575460	1575610	CBG05108_1575460_1575610	+	-60.944	-0.406293
chrI	1575748	1575794	CBG05108_1575748_1575794	+	-13.236	-0.287739
chrI	1575956	1576007	CBG05108_1575956_1576007	+	-15.424	-0.302431
chrI	1576503	1576839	CBG05107_1576503_1576839	+	-135.633	-0.40367
chrI	1576980	1577021	CBG05107_1576980_1577021	+	-11.678	-0.284829
chrI	1577183	1577230	CBG05107_1577183_1577230	+	-10.43	-0.221915
chrI	1583821	1584022	CBG05104_1583821_1584022	+	-79.722	-0.396627
chrI	1584125	1584170	CBG05104_1584125_1584170	+	-11.025	-0.245
chrI	1584452	1584619	CBG05104_1584452_1584619	+	-47.564	-0.284814
chrI	1584728	1584836	CBG05104_1584728_1584836	+	-29.704	-0.275037
chrI	1584925	1585659	CBG05104_1584925_1585659	+	-328.491	-0.447535
chrI	1586054	1586613	CBG05104_1586054_1586613	+	-236.717	-0.423465
chrI	1587180	1587536	CBG05104_1587180_1587536	+	-134.481	-0.377756
chrI	1587839	1588411	CBG05104_1587839_1588411	+	-276.307	-0.483054
chrI	1588704	1589182	CBG05104_1588704_1589182	+	-203.072	-0.424837
chrI	1590507	1590895	CBG05104_1590507_1590895	+	-116.778	-0.300974
chrI	1591183	1591875	CBG05104_1591183_1591875	+	-310.338	-0.448465
chrI	1597410	1599144	CBG05103_1597410_1599144	+	-781.505	-0.450695
chrI	1599226	1599605	CBG05103_1599226_1599605	+	-153.062	-0.403858
chrI	1599760	1599915	CBG05103_1599760_1599915	+	-38.754	-0.250026
chrI	1600305	1601019	CBG05103_1600305_1601019	+	-255.045	-0.357206
chrI	1601223	1601831	CBG05103_1601223_1601831	+	-247.613	-0.407258
chrI	1602083	1602254	CBG05103_1602083_1602254	+	-53.138	-0.310749
chrI	1602546	1602593	CBG05103_1602546_1602593	+	-8.58	-0.182553
chrI	1602807	1603631	CBG05103_1602807_1603631	+	-374.469	-0.454453
chrI	1603788	1603832	CBG05103_1603788_1603832	+	-9.051	-0.205705
chrI	1603964	1604013	CBG05103_1603964_1604013	+	-12.04	-0.245714
chrI	1604330	1604456	CBG05103_1604330_1604456	+	-36.868	-0.292603
chrI	1604754	1605614	CBG05103_1604754_1605614	+	-338.7	-0.393837
chrI	1605788	1606287	CBG05103_1605788_1606287	+	-168.045	-0.336764
chrI	1606411	1606455	CBG05103_1606411_1606455	+	-9.603	-0.21825
chrI	1606625	1606670	CBG05103_1606625_1606670	+	-12.739	-0.283089
chrI	1606870	1607127	CBG05103_1606870_1607127	+	-109.974	-0.427914
chrI	1607252	1607599	CBG05103_1607252_1607599	+	-168.229	-0.48481
chrI	1607810	1607868	CBG05103_1607810_1607868	+	-16.003	-0.275914
chrI	1608546	1609254	CBG05103_1608546_1609254	+	-304.477	-0.430052
chrI	1609386	1609436	CBG05103_1609386_1609436	+	-11.74	-0.2348
chrI	1611260	1611421	CBG25178_1611260_1611421	+	-52.187	-0.324143
chrI	1613439	1614125	CBG05101_1613439_1614125	-	-286.787	-0.418057
chrI	1614738	1615221	CBG05101_1614738_1615221	-	-157.393	-0.325865
chrI	1620953	1621634	CBG05100_1620953_1621634	-	-262.972	-0.386156
chrI	1621728	1621779	CBG05100_1621728_1621779	-	-7.308	-0.143294
chrI	1621981	1622033	CBG05100_1621981_1622033	-	-14.972	-0.287923
chrI	1622351	1625502	CBG05100_1622351_1625502	-	-1366.53	-0.433681
chrI	1625660	1625710	CBG05100_1625660_1625710	-	-21.302	-0.42604
chrI	1625890	1626785	CBG05100_1625890_1626785	-	-467.741	-0.522616
chrI	1626985	1627222	CBG05100_1626985_1627222	-	-46.279	-0.19527
chrI	1627367	1628099	CBG05100_1627367_1628099	-	-221.445	-0.30252
chrI	1638022	1638846	CBG05099_1638022_1638846	-	-305.547	-0.370809
chrI	1639069	1639117	CBG05099_1639069_1639117	-	-12.228	-0.25475
chrI	1639254	1639965	CBG05099_1639254_1639965	-	-309.206	-0.434889
chrI	1640205	1640962	CBG05099_1640205_1640962	-	-283.872	-0.374996
chrI	1641172	1642628	CBG05099_1641172_1642628	-	-757.433	-0.520215
chrI	1643041	1643485	CBG05099_1643041_1643485	-	-159.918	-0.360176
chrI	1644274	1644777	CBG05098_1644274_1644777	-	-172.47	-0.342883
chrI	1644832	1644917	CBG05098_1644832_1644917	-	-21.802	-0.256494
chrI	1645512	1645795	CBG05098_1645512_1645795	-	-92.19	-0.32576
chrI	1646151	1646199	CBG05098_1646151_1646199	-	-10.684	-0.222583
chrI	1646265	1646626	CBG05098_1646265_1646626	-	-98.683	-0.27336
chrI	1647100	1647147	CBG05098_1647100_1647147	-	-7.313	-0.155596
chrI	1648256	1648303	CBG05097_1648256_1648303	-	-6.578	-0.139957
chrI	1648722	1648767	CBG05097_1648722_1648767	-	-8.457	-0.187933
chrI	1648971	1649029	CBG05097_1648971_1649029	-	-10.437	-0.179948
chrI	1649273	1649322	CBG05097_1649273_1649322	-	-13.841	-0.282469
chrI	1651106	1651149	CBG05096_1651106_1651149	-	-13.238	-0.30786
chrI	1651262	1651315	CBG05096_1651262_1651315	-	-14.181	-0.267566
chrI	1651592	1651748	CBG05096_1651592_1651748	-	-41.321	-0.264878
chrI	1651868	1652250	CBG05096_1651868_1652250	-	-120.98	-0.316702
chrI	1652557	1652803	CBG05096_1652557_1652803	-	-65.858	-0.267715
chrI	1653024	1653346	CBG05096_1653024_1653346	-	-95.222	-0.29572
chrI	1653650	1654459	CBG05096_1653650_1654459	-	-323.34	-0.399679
chrI	1654770	1655644	CBG05096_1654770_1655644	-	-359.789	-0.411658
chrI	1655792	1655854	CBG05096_1655792_1655854	-	-15.638	-0.252226
chrI	1656120	1656654	CBG05096_1656120_1656654	-	-264.259	-0.494867
chrI	1659160	1659311	CBG05096_1659160_1659311	-	-46.134	-0.305523
chrI	1659955	1660419	CBG05095_1659955_1660419	-	-173.317	-0.373528
chrI	1660506	1660550	CBG05095_1660506_1660550	-	-16.735	-0.380341
chrI	1660648	1660708	CBG05095_1660648_1660708	-	-12.606	-0.2101
chrI	1661666	1663589	CBG25179_1661666_1663589	-	-720.56	-0.374706
chrI	1668361	1670268	CBG05090_1668361_1670268	+	-691.629	-0.362679
chrI	1671818	1672295	CBG05090_1671818_1672295	+	-192.539	-0.403646
chrI	1672526	1674943	CBG05090_1672526_1674943	+	-1008.03	-0.417058
chrI	1675191	1676452	CBG05090_1675191_1676452	+	-549.024	-0.435388
chrI	1676849	1677572	CBG05090_1676849_1677572	+	-245.179	-0.339113
chrI	1677700	1677774	CBG05089_1677700_1677774	-	-24.24	-0.327568
chrI	1678243	1678944	CBG05089_1678243_1678944	-	-261.087	-0.372449
chrI	1680048	1680787	CBG25180_1680048_1680787	-	-343.477	-0.464786
chrI	1680858	1680908	CBG25180_1680858_1680908	-	-12.01	-0.2402
chrI	1681004	1681050	CBG25180_1681004_1681050	-	-13.382	-0.290913
chrI	1681174	1681217	CBG25180_1681174_1681217	-	-9.047	-0.210395
chrI	1681456	1681788	CBG25180_1681456_1681788	-	-113.103	-0.340672
chrI	1682103	1682148	CBG22666_1682103_1682148	+	-10.728	-0.2384
chrI	1682381	1682465	CBG22666_1682381_1682465	+	-17.748	-0.211286
chrI	1682577	1682620	CBG22666_1682577_1682620	+	-4.991	-0.11607
chrI	1682852	1683318	CBG22666_1682852_1683318	+	-176.998	-0.379824
chrI	1683369	1684217	CBG22666_1683369_1684217	+	-335.014	-0.395064
chrI	1684802	1685108	CBG22667_1684802_1685108	+	-120.923	-0.395173
chrI	1685435	1685683	CBG22667_1685435_1685683	+	-82.773	-0.333762
chrI	1685824	1686336	CBG22667_1685824_1686336	+	-201.161	-0.392893
chrI	1686495	1686615	CBG22667_1686495_1686615	+	-40.503	-0.337525
chrI	1686747	1686789	CBG22667_1686747_1686789	+	-13.888	-0.330667
chrI	1687318	1687678	CBG22668_1687318_1687678	-	-155.151	-0.430975
chrI	1687993	1688622	CBG22668_1687993_1688622	-	-342.014	-0.543742
chrI	1688706	1688754	CBG22668_1688706_1688754	-	-13.313	-0.277354
chrI	1689034	1690049	CBG22668_1689034_1690049	-	-470.414	-0.463462
chrI	1690564	1690846	CBG22668_1690564_1690846	-	-86.461	-0.306599
chrI	1690973	1691507	CBG22668_1690973_1691507	-	-220.653	-0.413208
chrI	1691832	1692725	CBG22668_1691832_1692725	-	-281.589	-0.315329
chrI	1693098	1693664	CBG22668_1693098_1693664	-	-257.275	-0.454549
chrI	1693770	1694748	CBG22668_1693770_1694748	-	-333.633	-0.341138
chrI	1695351	1696379	CBG22669_1695351_1696379	-	-351.652	-0.342074
chrI	1696508	1696841	CBG22669_1696508_1696841	-	-117.586	-0.353111
chrI	1697937	1698867	CBG22670_1697937_1698867	+	-492.673	-0.529756
chrI	1699015	1699445	CBG22670_1699015_1699445	+	-143.926	-0.334712
chrI	1699480	1699759	CBG22670_1699480_1699759	+	-92.03	-0.329857
chrI	1700154	1701152	CBG22670_1700154_1701152	+	-416.709	-0.417544
chrI	1701391	1701434	CBG22670_1701391_1701434	+	-9.047	-0.210395
chrI	1701558	1701604	CBG22670_1701558_1701604	+	-13.382	-0.290913
chrI	1701700	1701750	CBG22670_1701700_1701750	+	-12.01	-0.2402
chrI	1701821	1702560	CBG22670_1701821_1702560	+	-343.477	-0.464786
chrI	1703969	1704475	CBG22671_1703969_1704475	+	-182.591	-0.360852
chrI	1706108	1706154	CBG22004_1706108_1706154	+	-9.746	-0.21187
chrI	1706369	1706418	CBG22004_1706369_1706418	+	-10.075	-0.205612
chrI	1706969	1707020	CBG22004_1706969_1707020	+	-5.917	-0.11602
chrI	1707506	1707552	CBG22004_1707506_1707552	+	-3.488	-0.075826
chrI	1707897	1707947	CBG22004_1707897_1707947	+	-10.293	-0.20586
chrI	1711734	1712234	CBG22005_1711734_1712234	+	-187.838	-0.375676
chrI	1712315	1712945	CBG22005_1712315_1712945	+	-196.629	-0.31211
chrI	1713405	1714950	CBG22005_1713405_1714950	+	-682.684	-0.441867
chrI	1715178	1715245	CBG22005_1715178_1715245	+	-12.906	-0.192627
chrI	1715421	1715726	CBG22005_1715421_1715726	+	-108.036	-0.354216
chrI	1715984	1716652	CBG22005_1715984_1716652	+	-224.464	-0.336024
chrI	1716671	1717433	CBG22005_1716671_1717433	+	-370.33	-0.485997
chrI	1717563	1717694	CBG22005_1717563_1717694	+	-37.633	-0.287275
chrI	1724674	1725378	CBG22008_1724674_1725378	+	-212.488	-0.30183
chrI	1725666	1726004	CBG22008_1725666_1726004	+	-104.575	-0.309393
chrI	1727125	1727192	CBG22009_1727125_1727192	+	-17.654	-0.263493
chrI	1727291	1727482	CBG22009_1727291_1727482	+	-74.639	-0.39078
chrI	1733536	1733725	CBG22009_1733536_1733725	+	-68.338	-0.361577
chrI	1734782	1734839	CBG22010_1734782_1734839	-	-10.245	-0.179737
chrI	1734946	1734995	CBG22010_1734946_1734995	-	-10.653	-0.217408
chrI	1735070	1735120	CBG22010_1735070_1735120	-	-22.523	-0.45046
chrI	1736266	1736310	CBG22015_1736266_1736310	+	-14.11	-0.320682
chrI	1736421	1737224	CBG22015_1736421_1737224	+	-198.995	-0.247814
chrI	1737721	1744731	CBG22015_1737721_1744731	+	-2842.16	-0.405444
chrI	1739446	1740888	CBG22012_1739446_1740888	-	-619.917	-0.429901
chrI	1741362	1741498	CBG22012_1741362_1741498	-	-44.046	-0.323868
chrI	1741714	1742447	CBG22012_1741714_1742447	-	-280.204	-0.38227
chrI	1744891	1745383	CBG22015_1744891_1745383	+	-143.055	-0.290762
chrI	1745705	1746499	CBG22015_1745705_1746499	+	-348.725	-0.4392
chrI	1746722	1748032	CBG22015_1746722_1748032	+	-472.551	-0.360726
chrI	1748317	1748363	CBG22015_1748317_1748363	+	-15.408	-0.334957
chrI	1748485	1749672	CBG22015_1748485_1749672	+	-567.05	-0.477717
chrI	1749848	1750905	CBG22015_1749848_1750905	+	-447.1	-0.42299
chrI	1751342	1752141	CBG22015_1751342_1752141	+	-340.778	-0.426506
chrI	1752472	1752528	CBG22015_1752472_1752528	+	-13.335	-0.238125
chrI	1752617	1752667	CBG22015_1752617_1752667	+	-11.771	-0.23542
chrI	1752863	1753258	CBG22015_1752863_1753258	+	-104.151	-0.263673
chrI	1753425	1753830	CBG22015_1753425_1753830	+	-156.568	-0.386588
chrI	1754093	1754680	CBG22015_1754093_1754680	+	-259.259	-0.441668
chrI	1754969	1756061	CBG22015_1754969_1756061	+	-296.98	-0.27196
chrI	1756236	1756463	CBG22015_1756236_1756463	+	-65.079	-0.286692
chrI	1757418	1757895	CBG22015_1757418_1757895	+	-265.767	-0.557164
chrI	1758487	1759384	CBG22015_1758487_1759384	+	-421.139	-0.469497
chrI	1761642	1761686	CBG22015_1761642_1761686	+	-4.221	-0.095932
chrI	1761984	1762678	CBG22015_1761984_1762678	+	-217.694	-0.31368
chrI	1762823	1763061	CBG22015_1762823_1763061	+	-71.124	-0.29884
chrI	1763359	1764203	CBG22015_1763359_1764203	+	-313.375	-0.371297
chrI	1764375	1764424	CBG22015_1764375_1764424	+	-10.141	-0.206959
chrI	1764513	1764561	CBG22015_1764513_1764561	+	-14.889	-0.310188
chrI	1764648	1764720	CBG22015_1764648_1764720	+	-25.109	-0.348736
chrI	1764884	1765088	CBG22015_1764884_1765088	+	-63.662	-0.312069
chrI	1767003	1767049	CBG22016_1767003_1767049	+	-12.53	-0.272391
chrI	1767192	1767613	CBG22016_1767192_1767613	+	-142.019	-0.337337
chrI	1767791	1767848	CBG22016_1767791_1767848	+	-18.412	-0.323018
chrI	1767955	1768659	CBG22016_1767955_1768659	+	-252.325	-0.358416
chrI	1768787	1768920	CBG22016_1768787_1768920	+	-44.454	-0.334241
chrI	1769420	1769769	CBG22017_1769420_1769769	-	-154.392	-0.442384
chrI	1769873	1770451	CBG22017_1769873_1770451	-	-220.699	-0.381832
chrI	1770582	1770626	CBG22017_1770582_1770626	-	-12.032	-0.273455
chrI	1770703	1770861	CBG22017_1770703_1770861	-	-46.48	-0.294177
chrI	1771004	1771380	CBG22017_1771004_1771380	-	-119.489	-0.31779
chrI	1771693	1771809	CBG22017_1771693_1771809	-	-35.847	-0.309026
chrI	1772092	1772232	CBG22017_1772092_1772232	-	-44.062	-0.314729
chrI	1772600	1772733	CBG22017_1772600_1772733	-	-39.435	-0.296504
chrI	1772866	1772979	CBG22017_1772866_1772979	-	-33.534	-0.296761
chrI	1812312	1812362	CBG22020_1812312_1812362	-	-10.661	-0.21322
chrI	1813294	1814378	CBG22019_1813294_1814378	+	-359.613	-0.331746
chrI	1814509	1815509	CBG22019_1814509_1815509	+	-332.595	-0.332595
chrI	1815739	1816619	CBG22019_1815739_1816619	+	-320.504	-0.364209
chrI	1816829	1817154	CBG22019_1816829_1817154	+	-131.995	-0.406138
chrI	1817235	1818076	CBG22019_1817235_1818076	+	-325.25	-0.386742
chrI	1818963	1819817	CBG22021_1818963_1819817	-	-282.322	-0.330588
chrI	1819987	1820736	CBG22021_1819987_1820736	-	-363.131	-0.484821
chrI	1821030	1821924	CBG22021_1821030_1821924	-	-353.866	-0.395823
chrI	1822006	1823630	CBG22021_1822006_1823630	-	-656.705	-0.404375
chrI	1823700	1823840	CBG22021_1823700_1823840	-	-42.424	-0.303029
chrI	1825850	1825893	CBG22023_1825850_1825893	+	-11.176	-0.259907
chrI	1825970	1826016	CBG22023_1825970_1826016	+	-10.564	-0.229652
chrI	1826755	1827423	CBG22023_1826755_1827423	+	-244.439	-0.365927
chrI	1827657	1827704	CBG22023_1827657_1827704	+	-15.525	-0.330319
chrI	1827794	1828356	CBG22023_1827794_1828356	+	-193.493	-0.344294
chrI	1828550	1828600	CBG22023_1828550_1828600	+	-17.55	-0.351
chrI	1831067	1831112	CBG22024_1831067_1831112	-	-15.52	-0.344889
chrI	1832111	1832671	CBG22024_1832111_1832671	-	-193.586	-0.345689
chrI	1834116	1834351	CBG22023_1834116_1834351	+	-107.296	-0.456579
chrI	1834521	1834572	CBG22023_1834521_1834572	+	-12.545	-0.24598
chrI	1835023	1836196	CBG22023_1835023_1836196	+	-676.766	-0.576953
chrI	1836333	1836383	CBG22023_1836333_1836383	+	-11.911	-0.23822
chrI	1836525	1836849	CBG22023_1836525_1836849	+	-116.437	-0.359373
chrI	1837083	1837808	CBG22023_1837083_1837808	+	-305.422	-0.421272
chrI	1837979	1838052	CBG22023_1837979_1838052	+	-17.138	-0.234767
chrI	1838164	1838588	CBG22023_1838164_1838588	+	-128.182	-0.302316
chrI	1838694	1838791	CBG22023_1838694_1838791	+	-29.492	-0.304041
chrI	1839077	1839827	CBG22023_1839077_1839827	+	-255.951	-0.341268
chrI	1839952	1840197	CBG22023_1839952_1840197	+	-83.591	-0.341188
chrI	1840324	1840507	CBG22023_1840324_1840507	+	-75.868	-0.414579
chrI	1840714	1840760	CBG22023_1840714_1840760	+	-13.128	-0.285391
chrI	1841698	1841746	CBG22025_1841698_1841746	-	-16.248	-0.3385
chrI	1841886	1842223	CBG22025_1841886_1842223	-	-113.947	-0.338122
chrI	1842469	1842970	CBG22025_1842469_1842970	-	-206.696	-0.412567
chrI	1843082	1843477	CBG22025_1843082_1843477	-	-167.333	-0.423628
chrI	1843563	1843621	CBG22025_1843563_1843621	-	-15.473	-0.266776
chrI	1844156	1844496	CBG22025_1844156_1844496	-	-248.588	-0.731141
chrI	1844553	1844601	CBG22025_1844553_1844601	-	-12.763	-0.265896
chrI	1858965	1859839	CBG22026_1858965_1859839	-	-464.283	-0.531216
chrI	1859919	1860115	CBG22026_1859919_1860115	-	-68.696	-0.35049
chrI	1860408	1860680	CBG22026_1860408_1860680	-	-80.108	-0.294515
chrI	1860837	1863909	CBG22026_1860837_1863909	-	-1346.1	-0.438184
chrI	1864033	1864593	CBG22026_1864033_1864593	-	-328.178	-0.586032
chrI	1864769	1864955	CBG22026_1864769_1864955	-	-63.654	-0.342226
chrI	1865406	1865621	CBG22026_1865406_1865621	-	-72.402	-0.336753
chrI	1865955	1867196	CBG22026_1865955_1867196	-	-391.423	-0.315409
chrI	1880678	1880879	CBG22028_1880678_1880879	+	-66.273	-0.329716
chrI	1889004	1889815	CBG22031_1889004_1889815	-	-294.483	-0.363111
chrI	1889994	1890255	CBG22031_1889994_1890255	-	-86.586	-0.331747
chrI	1890389	1892008	CBG22031_1890389_1892008	-	-595.299	-0.367695
chrI	1892456	1893310	CBG22031_1892456_1893310	-	-371.225	-0.43469
chrI	1893421	1893477	CBG22031_1893421_1893477	-	-16.269	-0.290518
chrI	1893596	1893649	CBG22031_1893596_1893649	-	-14.71	-0.277547
chrI	1894820	1894946	CBG22032_1894820_1894946	-	-28.369	-0.225151
chrI	1895069	1895551	CBG22032_1895069_1895551	-	-206.106	-0.427606
chrI	1896310	1896993	CBG22032_1896310_1896993	-	-347.237	-0.5084
chrI	1897278	1897410	CBG22032_1897278_1897410	-	-55.178	-0.418015
chrI	1897570	1897618	CBG22032_1897570_1897618	-	-5.098	-0.106208
chrI	1898078	1898121	CBG22034_1898078_1898121	+	-14.85	-0.345349
chrI	1898222	1898264	CBG22034_1898222_1898264	+	-5.74	-0.136667
chrI	1898456	1899174	CBG22034_1898456_1899174	+	-254.798	-0.354872
chrI	1899304	1899519	CBG22034_1899304_1899519	+	-75.973	-0.353363
chrI	1899749	1900860	CBG22034_1899749_1900860	+	-518.157	-0.466388
chrI	1901074	1901221	CBG22034_1901074_1901221	+	-61.36	-0.417415
chrI	1901341	1901396	CBG22034_1901341_1901396	+	-19.708	-0.358327
chrI	1901473	1902202	CBG22034_1901473_1902202	+	-295.33	-0.405117
chrI	1902773	1903949	CBG22034_1902773_1903949	+	-593.654	-0.504808
chrI	1904479	1904646	CBG22034_1904479_1904646	+	-65.37	-0.391437
chrI	1907434	1908240	CBG22035_1907434_1908240	+	-339.945	-0.421768
chrI	1908807	1909258	CBG22035_1908807_1909258	+	-158.406	-0.351233
chrI	1909462	1909806	CBG22035_1909462_1909806	+	-144.07	-0.418808
chrI	1910821	1910971	CBG22036_1910821_1910971	+	-44.193	-0.29462
chrI	1911073	1911123	CBG22036_1911073_1911123	+	-18.731	-0.37462
chrI	1912518	1913011	CBG22037_1912518_1913011	+	-235.136	-0.476949
chrI	1914518	1915538	CBG22037_1914518_1915538	+	-432.791	-0.424305
chrI	1915627	1915680	CBG22037_1915627_1915680	+	-10.131	-0.191151
chrI	1915738	1915783	CBG22037_1915738_1915783	+	-21.185	-0.470778
chrI	1915927	1916324	CBG22037_1915927_1916324	+	-184.538	-0.464831
chrI	1916814	1918654	CBG22037_1916814_1918654	+	-700.147	-0.380515
chrI	1919278	1919987	CBG22040_1919278_1919987	-	-264.495	-0.373054
chrI	1920059	1920110	CBG22040_1920059_1920110	-	-6.894	-0.135176
chrI	1920188	1920395	CBG22040_1920188_1920395	-	-56.658	-0.27371
chrI	1922794	1924494	CBG22040_1922794_1924494	-	-628.204	-0.369532
chrI	1924536	1924589	CBG22040_1924536_1924589	-	-20.67	-0.39
chrI	1924650	1924823	CBG22040_1924650_1924823	-	-45.115	-0.26078
chrI	1924917	1925217	CBG22040_1924917_1925217	-	-111.716	-0.372387
chrI	1927045	1927805	CBG22041_1927045_1927805	-	-243.223	-0.32003
chrI	1928054	1928140	CBG22041_1928054_1928140	-	-31.885	-0.370756
chrI	1928688	1929425	CBG22041_1928688_1929425	-	-227.948	-0.309292
chrI	1930159	1930205	CBG22042_1930159_1930205	-	-13.187	-0.286674
chrI	1930627	1930679	CBG22042_1930627_1930679	-	-15	-0.288462
chrI	1931664	1931902	CBG22043_1931664_1931902	+	-70.032	-0.294252
chrI	1932058	1932267	CBG22043_1932058_1932267	+	-67.233	-0.321689
chrI	1932777	1932828	CBG22044_1932777_1932828	+	-6.079	-0.119196
chrI	1933278	1933333	CBG22045_1933278_1933333	-	-11.802	-0.214582
chrI	1933665	1933872	CBG22045_1933665_1933872	-	-63.063	-0.304652
chrI	1933968	1934027	CBG22045_1933968_1934027	-	-21.638	-0.366746
chrI	1934093	1934149	CBG22045_1934093_1934149	-	-9.401	-0.167875
chrI	1934257	1934547	CBG22045_1934257_1934547	-	-109.123	-0.376286
chrI	1934610	1934677	CBG22045_1934610_1934677	-	-12.102	-0.180627
chrI	1934814	1934891	CBG22045_1934814_1934891	-	-23.543	-0.305753
chrI	1934962	1935005	CBG22045_1934962_1935005	-	-11.981	-0.278628
chrI	1941560	1942705	CBG22046_1941560_1942705	-	-455.401	-0.39773
chrI	1942800	1943027	CBG22046_1942800_1943027	-	-78.769	-0.347
chrI	1944509	1944619	CBG22047_1944509_1944619	-	-39.487	-0.358973
chrI	1945341	1945403	CBG22048_1945341_1945403	+	-8.937	-0.144145
chrI	1945551	1945599	CBG22048_1945551_1945599	+	-10.498	-0.218708
chrI	1945685	1945901	CBG22048_1945685_1945901	+	-60.102	-0.27825
chrI	1946005	1946121	CBG22048_1946005_1946121	+	-43.421	-0.374319
chrI	1946317	1947712	CBG22048_1946317_1947712	+	-950.006	-0.681008
chrI	1948005	1949041	CBG22048_1948005_1949041	+	-253.732	-0.244915
chrI	1949168	1949808	CBG22048_1949168_1949808	+	-211.016	-0.329713
chrI	1954985	1955116	CBG22049_1954985_1955116	+	-37.879	-0.289153
chrI	1955242	1957078	CBG22049_1955242_1957078	+	-680.71	-0.370757
chrI	1959166	1959360	CBG22049_1959166_1959360	+	-75.466	-0.389
chrI	1959518	1960146	CBG22049_1959518_1960146	+	-181.486	-0.28899
chrI	1960409	1960976	CBG22049_1960409_1960976	+	-168.388	-0.296981
chrI	1961072	1961203	CBG22049_1961072_1961203	+	-41.048	-0.313344
chrI	1961461	1961605	CBG22049_1961461_1961605	+	-46.854	-0.325375
chrI	1961695	1962411	CBG22049_1961695_1962411	+	-196.872	-0.274961
chrI	1965059	1965837	CBG22050_1965059_1965837	-	-327.723	-0.421238
chrI	1966312	1966734	CBG22050_1966312_1966734	-	-138.43	-0.328033
chrI	1967067	1967710	CBG22050_1967067_1967710	-	-264.973	-0.412089
chrI	1967922	1968197	CBG22050_1967922_1968197	-	-75.385	-0.274127
chrI	1968341	1968389	CBG22050_1968341_1968389	-	-8.285	-0.172604
chrI	1968464	1969917	CBG22050_1968464_1969917	-	-550.777	-0.379062
chrI	1991755	1991801	CBG22052_1991755_1991801	-	-9.823	-0.213543
chrI	1992023	1993082	CBG22052_1992023_1993082	-	-460.803	-0.43513
chrI	1993288	1993328	CBG22052_1993288_1993328	-	-4.732	-0.1183
chrI	1993457	1993501	CBG22052_1993457_1993501	-	-8.339	-0.189523
chrI	1993630	1993683	CBG22052_1993630_1993683	-	-13.309	-0.251113
chrI	1999876	1999923	CBG22054_1999876_1999923	+	-4.226	-0.089915
chrI	2000046	2000357	CBG22054_2000046_2000357	+	-131.124	-0.421621
chrI	2002112	2003429	CBG22054_2002112_2003429	+	-562.014	-0.426738
chrI	2003600	2003777	CBG22054_2003600_2003777	+	-44.471	-0.251249
chrI	2003927	2003975	CBG22054_2003927_2003975	+	-18.732	-0.39025
chrI	2007291	2008608	CBG22054_2007291_2008608	+	-562.014	-0.426738
chrI	2008779	2008956	CBG22054_2008779_2008956	+	-44.471	-0.251249
chrI	2009106	2009154	CBG22054_2009106_2009154	+	-18.732	-0.39025
chrI	2009309	2010293	CBG22054_2009309_2010293	+	-407.115	-0.413735
chrI	2037289	2037980	CBG22058_2037289_2037980	+	-234.329	-0.339116
chrI	2038103	2038286	CBG22058_2038103_2038286	+	-68.243	-0.372913
chrI	2038377	2039876	CBG22058_2038377_2039876	+	-564.653	-0.376686
chrI	2040092	2043169	CBG22058_2040092_2043169	+	-1317.52	-0.428183
chrI	2043279	2043415	CBG22058_2043279_2043415	+	-27.594	-0.202897
chrI	2043693	2043763	CBG22058_2043693_2043763	+	-22.622	-0.323171
chrI	2043930	2047272	CBG22058_2043930_2047272	+	-1479.15	-0.442594
chrI	2047584	2047738	CBG22058_2047584_2047738	+	-41.449	-0.269149
chrI	2047877	2048512	CBG22058_2047877_2048512	+	-205.354	-0.323392
chrI	2049515	2049840	CBG22058_2049515_2049840	+	-117.885	-0.362723
chrI	2050208	2050944	CBG22058_2050208_2050944	+	-263.226	-0.357644
chrI	2051237	2052183	CBG22058_2051237_2052183	+	-354	-0.374207
chrI	2057285	2059053	CBG22059_2057285_2059053	+	-661.301	-0.374039
chrI	2059212	2060759	CBG22059_2059212_2060759	+	-596.24	-0.385417
chrI	2061121	2061805	CBG22059_2061121_2061805	+	-316.316	-0.46245
chrI	2061935	2062434	CBG22059_2061935_2062434	+	-209.863	-0.420567
chrI	2062730	2063379	CBG22059_2062730_2063379	+	-273.648	-0.421646
chrI	2064358	2064482	CBG22060_2064358_2064482	-	-50.22	-0.405
chrI	2064571	2064616	CBG22060_2064571_2064616	-	-17.307	-0.3846
chrI	2065513	2065686	CBG22061_2065513_2065686	-	-39.076	-0.225873
chrI	2065845	2066111	CBG22061_2065845_2066111	-	-74.049	-0.27838
chrI	2068210	2069614	CBG22061_2068210_2069614	-	-572.985	-0.408109
chrI	2069835	2070374	CBG22061_2069835_2070374	-	-280.106	-0.519677
chrI	2070459	2070500	CBG22061_2070459_2070500	-	-13.069	-0.318756
chrI	2070603	2071972	CBG22061_2070603_2071972	-	-659.279	-0.481577
chrI	2072189	2072742	CBG22061_2072189_2072742	-	-162.146	-0.293212
chrI	2073796	2073888	CBG22062_2073796_2073888	-	-21.683	-0.235685
chrI	2074039	2074088	CBG22062_2074039_2074088	-	-13.187	-0.269122
chrI	2075131	2075183	CBG22062_2075131_2075183	-	-6.407	-0.123212
chrI	2076315	2076365	CBG22062_2076315_2076365	-	-11.085	-0.2217
chrI	2079706	2080432	CBG22063_2079706_2080432	-	-283.196	-0.390077
chrI	2081112	2082364	CBG22063_2081112_2082364	-	-527.413	-0.421256
chrI	2083525	2083990	CBG22063_2083525_2083990	-	-140.384	-0.301901
chrI	2084152	2085237	CBG22063_2084152_2085237	-	-394.095	-0.363221
chrI	2085546	2086580	CBG22063_2085546_2086580	-	-364.237	-0.35226
chrI	2087283	2087417	CBG22064_2087283_2087417	+	-40.506	-0.302284
chrI	2087676	2087758	CBG22064_2087676_2087758	+	-27.74	-0.338293
chrI	2088018	2089129	CBG22064_2088018_2089129	+	-351.166	-0.316081
chrI	2089243	2090006	CBG22064_2089243_2090006	+	-216.121	-0.283252
chrI	2090750	2092940	CBG22064_2090750_2092940	+	-777.322	-0.354942
chrI	2093227	2093892	CBG22064_2093227_2093892	+	-226.248	-0.340223
chrI	2094025	2094543	CBG22064_2094025_2094543	+	-162.683	-0.31406
chrI	2094771	2096427	CBG22064_2094771_2096427	+	-551.73	-0.33317
chrI	2099007	2100823	CBG22065_2099007_2100823	-	-778.056	-0.428445
chrI	2101143	2101715	CBG22065_2101143_2101715	-	-212.233	-0.371037
chrI	2101819	2102213	CBG22065_2101819_2102213	-	-156.385	-0.396916
chrI	2105711	2105926	CBG22067_2105711_2105926	+	-75.973	-0.353363
chrI	2106156	2107267	CBG22067_2106156_2107267	+	-518.157	-0.466388
chrI	2107481	2107628	CBG22067_2107481_2107628	+	-61.36	-0.417415
chrI	2107748	2107803	CBG22067_2107748_2107803	+	-19.708	-0.358327
chrI	2107880	2108757	CBG22067_2107880_2108757	+	-353.194	-0.40273
chrI	2109135	2110546	CBG22067_2109135_2110546	+	-685.955	-0.486148
chrI	2112609	2113687	CBG22067_2112609_2113687	+	-370.304	-0.34351
chrI	2116250	2117477	CBG22068_2116250_2117477	-	-447.387	-0.364619
chrI	2117553	2117768	CBG22068_2117553_2117768	-	-73.646	-0.34254
chrI	2117960	2118061	CBG22068_2117960_2118061	-	-28.909	-0.286228
chrI	2118355	2118404	CBG22068_2118355_2118404	-	-15.983	-0.326184
chrI	2118470	2118600	CBG22068_2118470_2118600	-	-32.469	-0.249762
chrI	2120825	2122796	CBG22069_2120825_2122796	+	-715.41	-0.362968
chrI	2122844	2122940	CBG22069_2122844_2122940	+	-20.235	-0.210781
chrI	2123119	2123555	CBG22069_2123119_2123555	+	-143.231	-0.328511
chrI	2123726	2124055	CBG22069_2123726_2124055	+	-154.083	-0.468337
chrI	2124150	2124216	CBG22069_2124150_2124216	+	-18.15	-0.275
chrI	2124403	2124592	CBG22069_2124403_2124592	+	-49.908	-0.264063
chrI	2125823	2125887	CBG25181_2125823_2125887	-	-23.232	-0.363
chrI	2126182	2126623	CBG25181_2126182_2126623	-	-276.265	-0.626451
chrI	2127268	2129510	CBG22071_2127268_2129510	-	-1311.97	-0.585178
chrI	2129797	2130315	CBG22071_2129797_2130315	-	-174.577	-0.337021
chrI	2130468	2130636	CBG22071_2130468_2130636	-	-61.625	-0.366815
chrI	2152410	2152707	CBG22074_2152410_2152707	+	-111.857	-0.376623
chrI	2152817	2152966	CBG22074_2152817_2152966	+	-47.491	-0.318732
chrI	2153039	2154168	CBG22074_2153039_2154168	+	-407.296	-0.360758
chrI	2154816	2155500	CBG22074_2154816_2155500	+	-211.15	-0.308699
chrI	2155663	2155802	CBG22074_2155663_2155802	+	-35.757	-0.257245
chrI	2157540	2158258	CBG22075_2157540_2158258	-	-268.59	-0.374081
chrI	2158766	2159403	CBG22075_2158766_2159403	-	-333.32	-0.523265
chrI	2159529	2159871	CBG22075_2159529_2159871	-	-128.969	-0.377102
chrI	2160099	2161616	CBG22075_2160099_2161616	-	-1002.58	-0.660897
chrI	2161877	2162186	CBG22075_2161877_2162186	-	-115.535	-0.3739
chrI	2162365	2163183	CBG22075_2162365_2163183	-	-299.88	-0.366601
chrI	2163272	2163405	CBG22075_2163272_2163405	-	-44.938	-0.33788
chrI	2163502	2163617	CBG22075_2163502_2163617	-	-38.31	-0.33313
chrI	2163785	2168651	CBG22075_2163785_2168651	-	-2297.18	-0.472088
chrI	2168850	2169287	CBG22075_2168850_2169287	-	-143.871	-0.329224
chrI	2169532	2170065	CBG22075_2169532_2170065	-	-166.951	-0.313229
chrI	2170248	2170802	CBG22075_2170248_2170802	-	-174.547	-0.315067
chrI	2170932	2170981	CBG22075_2170932_2170981	-	-21.562	-0.440041
chrI	2171076	2171288	CBG22075_2171076_2171288	-	-63.044	-0.297377
chrI	2171378	2171523	CBG22075_2171378_2171523	-	-32.121	-0.221524
chrI	2174211	2174759	CBG22077_2174211_2174759	+	-220.744	-0.402818
chrI	2174843	2174890	CBG22077_2174843_2174890	+	-15.296	-0.325447
chrI	2174990	2175039	CBG22077_2174990_2175039	+	-15.371	-0.313694
chrI	2175128	2175700	CBG22077_2175128_2175700	+	-207.031	-0.361942
chrI	2175957	2176089	CBG22077_2175957_2176089	+	-38.302	-0.290167
chrI	2176170	2176387	CBG22077_2176170_2176387	+	-54.654	-0.251862
chrI	2176418	2176964	CBG22077_2176418_2176964	+	-163.628	-0.299685
chrI	2177048	2177169	CBG22077_2177048_2177169	+	-28.818	-0.238165
chrI	2177235	2177314	CBG22077_2177235_2177314	+	-18.675	-0.236392
chrI	2177339	2177409	CBG22077_2177339_2177409	+	-15.073	-0.215329
chrI	2177490	2179044	CBG22077_2177490_2179044	+	-579.16	-0.37269
chrI	2179130	2179171	CBG22077_2179130_2179171	+	-7.639	-0.186317
chrI	2179434	2179680	CBG22077_2179434_2179680	+	-90.839	-0.369264
chrI	2180894	2180964	CBG22077_2180894_2180964	+	-29.645	-0.4235
chrI	2181030	2182501	CBG22077_2181030_2182501	+	-540.971	-0.367757
chrI	2182677	2182839	CBG22077_2182677_2182839	+	-47.374	-0.292432
chrI	2182920	2182992	CBG22077_2182920_2182992	+	-24.564	-0.341167
chrI	2187017	2187510	CBG22078_2187017_2187510	-	-192.767	-0.391008
chrI	2187628	2188296	CBG22078_2187628_2188296	-	-299.3	-0.448054
chrI	2188394	2188609	CBG22078_2188394_2188609	-	-84.191	-0.391586
chrI	2188729	2191166	CBG22078_2188729_2191166	-	-982.362	-0.403103
chrI	2200823	2200916	CBG22081_2200823_2200916	+	-30.628	-0.329333
chrI	2201028	2201857	CBG22081_2201028_2201857	+	-288.098	-0.347525
chrI	2202027	2202100	CBG22081_2202027_2202100	+	-18.813	-0.257712
chrI	2203236	2203341	CBG22082_2203236_2203341	-	-35.288	-0.336076
chrI	2205504	2207014	CBG22083_2205504_2207014	+	-616.519	-0.408291
chrI	2207235	2207371	CBG22083_2207235_2207371	+	-48.157	-0.354096
chrI	2207535	2207817	CBG22083_2207535_2207817	+	-136.831	-0.485216
chrI	2208036	2208369	CBG22083_2208036_2208369	+	-117.245	-0.352087
chrI	2208514	2209198	CBG22083_2208514_2209198	+	-285.545	-0.417463
chrI	2213929	2214103	CBG22085_2213929_2214103	+	-52.336	-0.300782
chrI	2222610	2223547	CBG22086_2222610_2223547	+	-420.152	-0.448401
chrI	2224526	2224580	CBG22086_2224526_2224580	+	-14.507	-0.268648
chrI	2224656	2224703	CBG22086_2224656_2224703	+	-10.917	-0.232277
chrI	2225639	2225775	CBG22087_2225639_2225775	+	-47.783	-0.351346
chrI	2226572	2227165	CBG22088_2226572_2227165	-	-331.775	-0.559486
chrI	2227345	2227712	CBG22088_2227345_2227712	-	-144.545	-0.393856
chrI	2227838	2228465	CBG22088_2227838_2228465	-	-265.588	-0.423585
chrI	2228641	2228937	CBG22088_2228641_2228937	-	-150.331	-0.507875
chrI	2229109	2230129	CBG22088_2229109_2230129	-	-456.262	-0.447316
chrI	2230390	2231064	CBG22088_2230390_2231064	-	-259.687	-0.385292
chrI	2248660	2248706	CBG22089_2248660_2248706	+	-2.823	-0.06137
chrI	2248946	2249051	CBG22089_2248946_2249051	+	-27.041	-0.257533
chrI	2250810	2251627	CBG22089_2250810_2251627	+	-308.622	-0.37775
chrI	2251834	2252082	CBG22089_2251834_2252082	+	-83.385	-0.33623
chrI	2252299	2253170	CBG22089_2252299_2253170	+	-250.16	-0.28721
chrI	2253262	2253307	CBG22089_2253262_2253307	+	-9.556	-0.212356
chrI	2253410	2254175	CBG22089_2253410_2254175	+	-213.362	-0.278905
chrI	2254434	2258006	CBG22089_2254434_2258006	+	-1403.3	-0.392861
chrI	2255446	2255766	CBG22090_2255446_2255766	-	-138.995	-0.434359
chrI	2258335	2258977	CBG22089_2258335_2258977	+	-200.365	-0.312095
chrI	2259198	2267520	CBG22089_2259198_2267520	+	-3288.94	-0.39521
chrI	2259590	2259787	CBG22091_2259590_2259787	-	-118.091	-0.599447
chrI	2260396	2260469	CBG22091_2260396_2260469	-	-17.129	-0.234644
chrI	2260600	2260648	CBG22091_2260600_2260648	-	-11.831	-0.246479
chrI	2260855	2260917	CBG22091_2260855_2260917	-	-11.979	-0.19321
chrI	2261139	2261195	CBG22091_2261139_2261195	-	-6.108	-0.109071
chrI	2275299	2276243	CBG22093_2275299_2276243	+	-320.078	-0.339066
chrI	2276339	2276712	CBG22093_2276339_2276712	+	-153.688	-0.412032
chrI	2276739	2277190	CBG22093_2276739_2277190	+	-173.034	-0.383667
chrI	2277562	2278545	CBG22093_2277562_2278545	+	-490.237	-0.498715
chrI	2279150	2280610	CBG22093_2279150_2280610	+	-477.829	-0.32728
chrI	2282805	2283824	CBG22093_2282805_2283824	+	-385.896	-0.378701
chrI	2284273	2284596	CBG22093_2284273_2284596	+	-86.268	-0.267084
chrI	2287253	2288016	CBG22094_2287253_2288016	-	-250.916	-0.328855
chrI	2292386	2292501	CBG22095_2292386_2292501	+	-20.037	-0.174235
chrI	2297290	2298618	CBG22096_2297290_2298618	+	-664.05	-0.500038
chrI	2298978	2299439	CBG22096_2298978_2299439	+	-194.592	-0.422108
chrI	2299841	2300245	CBG22096_2299841_2300245	+	-160.783	-0.397978
chrI	2300745	2301590	CBG22096_2300745_2301590	+	-322.328	-0.381453
chrI	2310051	2311494	CBG22096_2310051_2311494	+	-833.309	-0.577484
chrI	2311819	2312680	CBG22096_2311819_2312680	+	-353.583	-0.410666
chrI	2312859	2313175	CBG22096_2312859_2313175	+	-189.451	-0.599528
chrI	2314948	2315583	CBG22096_2314948_2315583	+	-177.996	-0.280309
chrI	2317193	2317546	CBG22096_2317193_2317546	+	-154.522	-0.437739
chrI	2320894	2321460	CBG22097_2320894_2321460	+	-230.168	-0.406657
chrI	2325755	2325954	CBG22099_2325755_2325954	-	-72.182	-0.362724
chrI	2326242	2326915	CBG22099_2326242_2326915	-	-235.919	-0.350548
chrI	2327079	2327333	CBG22099_2327079_2327333	-	-103.952	-0.40926
chrI	2327419	2328049	CBG22099_2327419_2328049	-	-311.466	-0.49439
chrI	2328716	2332043	CBG22097_2328716_2332043	+	-1159.72	-0.348578
chrI	2332344	2333385	CBG22097_2332344_2333385	+	-415.261	-0.398906
chrI	2335077	2336265	CBG25182_2335077_2336265	+	-544.932	-0.458697
chrI	2336445	2337355	CBG25182_2336445_2337355	+	-468.99	-0.515374
chrI	2337949	2339238	CBG22101_2337949_2339238	+	-489.073	-0.37942
chrI	2339829	2340715	CBG22101_2339829_2340715	+	-304.203	-0.343344
chrI	2341017	2341523	CBG22101_2341017_2341523	+	-131.185	-0.259259
chrI	2341907	2342536	CBG22101_2341907_2342536	+	-216.136	-0.343618
chrI	2342954	2344022	CBG22101_2342954_2344022	+	-308.832	-0.289169
chrI	2344190	2345066	CBG22101_2344190_2345066	+	-308.595	-0.352277
chrI	2345420	2346681	CBG22101_2345420_2346681	+	-408.284	-0.323778
chrI	2346849	2347000	CBG22101_2346849_2347000	+	-50.932	-0.337298
chrI	2347616	2347662	CBG22102_2347616_2347662	+	-13.516	-0.293826
chrI	2347769	2347817	CBG22102_2347769_2347817	+	-8.36	-0.174167
chrI	2347896	2347994	CBG22102_2347896_2347994	+	-26.14	-0.266735
chrI	2348195	2349470	CBG22102_2348195_2349470	+	-402.277	-0.315511
chrI	2349610	2349979	CBG22102_2349610_2349979	+	-124.714	-0.337978
chrI	2350325	2351707	CBG22102_2350325_2351707	+	-765.731	-0.554075
chrI	2351933	2353801	CBG22102_2351933_2353801	+	-1101.19	-0.589502
chrI	2357192	2357563	CBG22103_2357192_2357563	+	-124.702	-0.336124
chrI	2357761	2357814	CBG22103_2357761_2357814	+	-14.381	-0.27134
chrI	2358003	2358052	CBG22103_2358003_2358052	+	-9.808	-0.200163
chrI	2358441	2358943	CBG22103_2358441_2358943	+	-162.549	-0.323803
chrI	2360715	2361831	CBG22103_2360715_2361831	+	-559.545	-0.501384
chrI	2362039	2362122	CBG22103_2362039_2362122	+	-24.986	-0.301036
chrI	2364171	2364218	CBG22104_2364171_2364218	+	-6.231	-0.132574
chrI	2364344	2364394	CBG22104_2364344_2364394	+	-14.06	-0.2812
chrI	2364738	2365033	CBG22104_2364738_2365033	+	-83.222	-0.282108
chrI	2365189	2365397	CBG22104_2365189_2365397	+	-81.101	-0.389909
chrI	2384357	2385020	CBG22107_2384357_2385020	+	-219.868	-0.331626
chrI	2385541	2386199	CBG22107_2385541_2386199	+	-222.023	-0.337421
chrI	2389358	2389781	CBG22108_2389358_2389781	+	-144.526	-0.341669
chrI	2389884	2389941	CBG22108_2389884_2389941	+	-11.649	-0.204368
chrI	2390068	2390315	CBG22108_2390068_2390315	+	-88.204	-0.357101
chrI	2397453	2397740	CBG22109_2397453_2397740	+	-110.32	-0.38439
chrI	2398154	2399862	CBG22109_2398154_2399862	+	-661.685	-0.387403
chrI	2400167	2400212	CBG22109_2400167_2400212	+	-9.471	-0.210467
chrI	2400300	2400350	CBG22109_2400300_2400350	+	-11.054	-0.22108
chrI	2400474	2400523	CBG22109_2400474_2400523	+	-12.999	-0.265286
chrI	2400609	2401927	CBG22109_2400609_2401927	+	-665.808	-0.505165
chrI	2402310	2403198	CBG22109_2402310_2403198	+	-409.823	-0.461512
chrI	2403430	2403493	CBG22109_2403430_2403493	+	-18.352	-0.291302
chrI	2403565	2403614	CBG22109_2403565_2403614	+	-12.452	-0.254122
chrI	2403698	2403744	CBG22109_2403698_2403744	+	-7.965	-0.173152
chrI	2408824	2408913	CBG22112_2408824_2408913	-	-22.99	-0.258315
chrI	2409079	2409171	CBG22111_2409079_2409171	+	-24.653	-0.267967
chrI	2409226	2409277	CBG22111_2409226_2409277	+	-11.852	-0.232392
chrI	2413843	2415657	CBG22113_2413843_2415657	+	-701.789	-0.386874
chrI	2415782	2415974	CBG22113_2415782_2415974	+	-64.473	-0.335797
chrI	2416434	2416542	CBG22115_2416434_2416542	-	-28.613	-0.264935
chrI	2416882	2417739	CBG22115_2416882_2417739	-	-364.067	-0.424816
chrI	2417878	2418043	CBG22115_2417878_2418043	-	-43.749	-0.265145
chrI	2418362	2419235	CBG22115_2418362_2419235	-	-329.698	-0.377661
chrI	2425593	2425642	CBG22115_2425593_2425642	-	-10.735	-0.219082
chrI	2425968	2426013	CBG22115_2425968_2426013	-	-4.861	-0.108022
chrI	2426221	2426533	CBG22115_2426221_2426533	-	-102.483	-0.328471
chrI	2427776	2427831	CBG22116_2427776_2427831	+	-13.691	-0.248927
chrI	2427967	2428035	CBG22116_2427967_2428035	+	-21.449	-0.315426
chrI	2428295	2428385	CBG22116_2428295_2428385	+	-31.863	-0.354033
chrI	2428521	2428785	CBG22116_2428521_2428785	+	-64.293	-0.243534
chrI	2429087	2429130	CBG22116_2429087_2429130	+	-10.998	-0.255767
chrI	2429543	2429589	CBG22116_2429543_2429589	+	-8.332	-0.18113
chrI	2429847	2429893	CBG22116_2429847_2429893	+	-12.203	-0.265283
chrI	2432591	2433182	CBG25183_2432591_2433182	+	-184.758	-0.312619
chrI	2433302	2433931	CBG25183_2433302_2433931	+	-470.097	-0.747372
chrI	2435410	2435473	CBG22118_2435410_2435473	-	-22.709	-0.36046
chrI	2435538	2436305	CBG22118_2435538_2436305	-	-267.608	-0.348902
chrI	2437181	2438029	CBG22118_2437181_2438029	-	-373.077	-0.439949
chrI	2439645	2440429	CBG22118_2439645_2440429	-	-282.393	-0.360195
chrI	2440886	2441059	CBG22118_2440886_2441059	-	-47.101	-0.27226
chrI	2443955	2444002	CBG22119_2443955_2444002	-	-11.796	-0.250979
chrI	2444076	2444508	CBG22119_2444076_2444508	-	-191.056	-0.442259
chrI	2444823	2444973	CBG22119_2444823_2444973	-	-38.904	-0.25936
chrI	2445180	2445330	CBG22119_2445180_2445330	-	-51.808	-0.345387
chrI	2445442	2446444	CBG22119_2445442_2446444	-	-327.719	-0.327065
chrI	2450464	2450563	CBG22120_2450464_2450563	+	-27.048	-0.273212
chrI	2450644	2450694	CBG22120_2450644_2450694	+	-7.986	-0.15972
chrI	2450847	2451202	CBG22120_2450847_2451202	+	-117.026	-0.329651
chrI	2451295	2451499	CBG22120_2451295_2451499	+	-63.623	-0.311877
chrI	2451624	2452720	CBG22120_2451624_2452720	+	-321.627	-0.293455
chrI	2452924	2453124	CBG22120_2452924_2453124	+	-76.688	-0.38344
chrI	2453293	2453448	CBG22120_2453293_2453448	+	-60.336	-0.389265
chrI	2453617	2454374	CBG22120_2453617_2454374	+	-283.445	-0.374432
chrI	2454927	2455687	CBG22120_2454927_2455687	+	-282.652	-0.371911
chrI	2455926	2456409	CBG22120_2455926_2456409	+	-212.701	-0.440375
chrI	2458457	2458503	CBG22121_2458457_2458503	-	-9.75	-0.211957
chrI	2458564	2459177	CBG22121_2458564_2459177	-	-326.573	-0.532746
chrI	2459779	2461224	CBG22122_2459779_2461224	+	-554.335	-0.383623
chrI	2461558	2461845	CBG22122_2461558_2461845	+	-99.157	-0.345495
chrI	2462026	2462886	CBG22122_2462026_2462886	+	-284.485	-0.330797
chrI	2462981	2463063	CBG22122_2462981_2463063	+	-19.119	-0.233159
chrI	2463230	2463416	CBG22122_2463230_2463416	+	-50.65	-0.272312
chrI	2469998	2470482	CBG22126_2469998_2470482	-	-173.838	-0.359169
chrI	2470639	2470713	CBG22126_2470639_2470713	-	-22.813	-0.308284
chrI	2471018	2472635	CBG22126_2471018_2472635	-	-637.973	-0.394541
chrI	2472756	2472803	CBG22126_2472756_2472803	-	-13.429	-0.285723
chrI	2473057	2473394	CBG22126_2473057_2473394	-	-160.929	-0.477534
chrI	2473659	2474469	CBG22126_2473659_2474469	-	-395.801	-0.488643
chrI	2474665	2474713	CBG22126_2474665_2474713	-	-13.995	-0.291563
chrI	2474972	2476113	CBG22126_2474972_2476113	-	-513.708	-0.450226
chrI	2477219	2477426	CBG22127_2477219_2477426	-	-53.372	-0.257836
chrI	2477779	2478881	CBG22127_2477779_2478881	-	-410.57	-0.372568
chrI	2479359	2479944	CBG22127_2479359_2479944	-	-187.539	-0.320579
chrI	2480214	2480628	CBG22127_2480214_2480628	-	-127.196	-0.307237
chrI	2481597	2484048	CBG22128_2481597_2484048	-	-901.334	-0.367741
chrI	2484158	2484648	CBG22128_2484158_2484648	-	-152.566	-0.311359
chrI	2484931	2485115	CBG22128_2484931_2485115	-	-60.81	-0.330489
chrI	2485305	2485403	CBG22128_2485305_2485403	-	-39.626	-0.404347
chrI	2485498	2487357	CBG22128_2485498_2487357	-	-782.554	-0.420954
chrI	2488472	2489188	CBG22129_2488472_2489188	+	-231.21	-0.322919
chrI	2489575	2490819	CBG22130_2489575_2490819	-	-483.708	-0.388833
chrI	2491073	2491891	CBG22130_2491073_2491891	-	-218.372	-0.266958
chrI	2492189	2492235	CBG22130_2492189_2492235	-	-9.664	-0.210087
chrI	2492464	2493577	CBG22130_2492464_2493577	-	-360.487	-0.323888
chrI	2493844	2494367	CBG22130_2493844_2494367	-	-158.189	-0.302465
chrI	2494519	2494672	CBG22130_2494519_2494672	-	-51.887	-0.339131
chrI	2494888	2496431	CBG22130_2494888_2496431	-	-503.323	-0.326198
chrI	2496755	2498164	CBG22130_2496755_2498164	-	-802.503	-0.569555
chrI	2498467	2499158	CBG22130_2498467_2499158	-	-225.383	-0.326169
chrI	2499357	2499496	CBG22130_2499357_2499496	-	-30.304	-0.218014
chrI	2499578	2499647	CBG22130_2499578_2499647	-	-18.222	-0.264087
chrI	2502135	2502761	CBG22131_2502135_2502761	-	-172.416	-0.275425
chrI	2503152	2503228	CBG22131_2503152_2503228	-	-30.676	-0.403632
chrI	2503315	2503425	CBG22131_2503315_2503425	-	-24.257	-0.220518
chrI	2505039	2505930	CBG22132_2505039_2505930	-	-164.486	-0.184608
chrI	2506172	2507266	CBG22132_2506172_2507266	-	-490.153	-0.448037
chrI	2507732	2508018	CBG22132_2507732_2508018	-	-83.705	-0.292675
chrI	2509880	2509999	CBG22133_2509880_2509999	-	-28.364	-0.238353
chrI	2510148	2511149	CBG22133_2510148_2511149	-	-416.33	-0.415914
chrI	2513750	2514216	CBG22135_2513750_2514216	+	-141.696	-0.304069
chrI	2514326	2514514	CBG22135_2514326_2514514	+	-55.237	-0.293814
chrI	2514691	2515858	CBG22135_2514691_2515858	+	-382.785	-0.328008
chrI	2516032	2516690	CBG22135_2516032_2516690	+	-229.074	-0.348137
chrI	2516957	2517291	CBG22135_2516957_2517291	+	-119.4	-0.357485
chrI	2517396	2517461	CBG22135_2517396_2517461	+	-17.995	-0.276846
chrI	2518108	2518353	CBG22136_2518108_2518353	+	-86.849	-0.354486
chrI	2520457	2520844	CBG22136_2520457_2520844	+	-137.371	-0.354964
chrI	2521076	2521536	CBG22136_2521076_2521536	+	-157.72	-0.34287
chrI	2522298	2522855	CBG22137_2522298_2522855	-	-184.2	-0.3307
chrI	2523069	2523112	CBG22137_2523069_2523112	-	-10.784	-0.250791
chrI	2523295	2524122	CBG22137_2523295_2524122	-	-254.499	-0.307738
chrI	2524470	2524518	CBG22137_2524470_2524518	-	-10.154	-0.211542
chrI	2524608	2524656	CBG22137_2524608_2524656	-	-10.614	-0.221125
chrI	2524775	2525271	CBG22137_2524775_2525271	-	-194.768	-0.392677
chrI	2525643	2526442	CBG22137_2525643_2526442	-	-256.613	-0.321168
chrI	2526865	2527739	CBG22137_2526865_2527739	-	-285.502	-0.326661
chrI	2531050	2531107	CBG22138_2531050_2531107	+	-13.411	-0.235281
chrI	2531219	2531732	CBG22138_2531219_2531732	+	-178.67	-0.348285
chrI	2531939	2532366	CBG22138_2531939_2532366	+	-168.558	-0.394749
chrI	2532681	2532733	CBG22138_2532681_2532733	+	-20.798	-0.399962
chrI	2532873	2532970	CBG22138_2532873_2532970	+	-19.427	-0.200278
chrI	2533784	2534004	CBG22139_2533784_2534004	-	-53.083	-0.241286
chrI	2534138	2534270	CBG22139_2534138_2534270	-	-40.281	-0.305159
chrI	2534697	2535230	CBG22139_2534697_2535230	-	-157.977	-0.296392
chrI	2536651	2536693	CBG22140_2536651_2536693	+	-6.705	-0.159643
chrI	2536888	2536959	CBG22140_2536888_2536959	+	-16.636	-0.23431
chrI	2537909	2537966	CBG22141_2537909_2537966	-	-14.186	-0.248877
chrI	2538113	2538704	CBG22141_2538113_2538704	-	-251.126	-0.424917
chrI	2538836	2538890	CBG22141_2538836_2538890	-	-9.816	-0.181778
chrI	2539034	2540280	CBG22141_2539034_2540280	-	-535.121	-0.429471
chrI	2541318	2541485	CBG22141_2541318_2541485	-	-43.271	-0.259108
chrI	2541872	2544668	CBG22141_2541872_2544668	-	-1044.53	-0.37358
chrI	2546209	2547113	CBG22142_2546209_2547113	-	-292.802	-0.323896
chrI	2547347	2547848	CBG22142_2547347_2547848	-	-163.847	-0.32704
chrI	2548460	2548509	CBG22143_2548460_2548509	-	-12.243	-0.249857
chrI	2548697	2548742	CBG22143_2548697_2548742	-	-11.625	-0.258333
chrI	2548791	2548840	CBG22143_2548791_2548840	-	-16.146	-0.32951
chrI	2549674	2550104	CBG22144_2549674_2550104	-	-204.313	-0.475147
chrI	2550661	2551534	CBG22144_2550661_2551534	-	-334.268	-0.382896
chrI	2552038	2552327	CBG22145_2552038_2552327	+	-99.568	-0.344526
chrI	2552627	2552694	CBG22145_2552627_2552694	+	-13.018	-0.194299
chrI	2552937	2553156	CBG22145_2552937_2553156	+	-53.258	-0.243187
chrI	2554537	2554583	CBG22146_2554537_2554583	-	-9.532	-0.207217
chrI	2554676	2554722	CBG22146_2554676_2554722	-	-5.387	-0.117109
chrI	2554798	2555185	CBG22146_2554798_2555185	-	-143.834	-0.371664
chrI	2555385	2555773	CBG22146_2555385_2555773	-	-125.411	-0.323224
chrI	2556039	2556393	CBG22146_2556039_2556393	-	-135.756	-0.383492
chrI	2556634	2556920	CBG22146_2556634_2556920	-	-145.79	-0.509755
chrI	2557119	2557163	CBG22146_2557119_2557163	-	-9.108	-0.207
chrI	2557333	2557381	CBG22146_2557333_2557381	-	-14.878	-0.309958
chrI	2561625	2562166	CBG22147_2561625_2562166	+	-175.567	-0.324523
chrI	2564195	2564261	CBG22147_2564195_2564261	+	-16.752	-0.253818
chrI	2564330	2564380	CBG22147_2564330_2564380	+	-11.225	-0.2245
chrI	2565269	2565333	CBG22148_2565269_2565333	-	-13.579	-0.212172
chrI	2565420	2566160	CBG22148_2565420_2566160	-	-223.638	-0.302214
chrI	2566483	2566604	CBG22148_2566483_2566604	-	-33.093	-0.273496
chrI	2566700	2567853	CBG22148_2566700_2567853	-	-388.336	-0.336805
chrI	2568009	2568087	CBG22148_2568009_2568087	-	-24.673	-0.316321
chrI	2568146	2568200	CBG22148_2568146_2568200	-	-22.824	-0.422667
chrI	2568294	2568348	CBG22148_2568294_2568348	-	-13.51	-0.250185
chrI	2572121	2572641	CBG22149_2572121_2572641	+	-191.456	-0.368185
chrI	2572990	2573041	CBG22149_2572990_2573041	+	-10.063	-0.197314
chrI	2573946	2574125	CBG22150_2573946_2574125	+	-41.741	-0.23319
chrI	2574940	2575345	CBG22151_2574940_2575345	+	-116.39	-0.287383
chrI	2575462	2575510	CBG22151_2575462_2575510	+	-7.046	-0.146792
chrI	2576044	2576121	CBG22151_2576044_2576121	+	-17.64	-0.229091
chrI	2576210	2576264	CBG22151_2576210_2576264	+	-7.507	-0.139019
chrI	2576472	2577108	CBG22151_2576472_2577108	+	-258.105	-0.405825
chrI	2578061	2578320	CBG22152_2578061_2578320	+	-102.918	-0.397367
chrI	2579654	2579972	CBG22152_2579654_2579972	+	-129.214	-0.406333
chrI	2585895	2586454	CBG22153_2585895_2586454	+	-257.392	-0.460451
chrI	2586915	2587497	CBG22153_2586915_2587497	+	-250.064	-0.429663
chrI	2588189	2590204	CBG22153_2588189_2590204	+	-820.291	-0.407092
chrI	2590961	2591630	CBG22153_2590961_2591630	+	-261.395	-0.390725
chrI	2597442	2598520	CBG25184_2597442_2598520	+	-509.421	-0.472561
chrI	2598928	2599605	CBG25184_2598928_2599605	+	-374.626	-0.553362
chrI	2600572	2600810	CBG22155_2600572_2600810	+	-77.579	-0.325962
chrI	2601727	2602124	CBG22156_2601727_2602124	-	-172.591	-0.434738
chrI	2602569	2603307	CBG22156_2602569_2603307	-	-329.826	-0.446919
chrI	2603390	2603463	CBG22156_2603390_2603463	-	-15.539	-0.212863
chrI	2603768	2603984	CBG22156_2603768_2603984	-	-76.447	-0.353921
chrI	2604956	2606097	CBG22157_2604956_2606097	-	-400.287	-0.350821
chrI	2609403	2609449	CBG22158_2609403_2609449	+	-11.151	-0.242413
chrI	2609887	2610012	CBG22158_2609887_2610012	+	-47.399	-0.379192
chrI	2610554	2611235	CBG22158_2610554_2611235	+	-195.186	-0.286617
chrI	2612233	2612499	CBG22159_2612233_2612499	-	-85.465	-0.321297
chrI	2613224	2613345	CBG22162_2613224_2613345	+	-14.628	-0.120893
chrI	2615411	2615532	CBG22161_2615411_2615532	-	-14.628	-0.120893
chrI	2615968	2616761	CBG22162_2615968_2616761	+	-283.02	-0.356898
chrI	2616843	2617262	CBG22162_2616843_2617262	+	-238.187	-0.568465
chrI	2617538	2618436	CBG22162_2617538_2618436	+	-366.024	-0.407599
chrI	2618729	2619166	CBG22162_2618729_2619166	+	-259.426	-0.593652
chrI	2619305	2619749	CBG22162_2619305_2619749	+	-181.984	-0.409874
chrI	2620422	2621284	CBG22163_2620422_2621284	-	-377.751	-0.438226
chrI	2621690	2621945	CBG22163_2621690_2621945	-	-41.724	-0.163624
chrI	2622147	2622236	CBG22163_2622147_2622236	-	-9.398	-0.105596
chrI	2623427	2625605	CBG22163_2623427_2625605	-	-957.019	-0.439403
chrI	2625728	2626869	CBG22163_2625728_2626869	-	-431.043	-0.377777
chrI	2628225	2628276	CBG25185_2628225_2628276	-	-9.794	-0.192039
chrI	2628334	2628404	CBG25185_2628334_2628404	-	-10.108	-0.1444
chrI	2629054	2629443	CBG22164_2629054_2629443	-	-144.202	-0.370699
chrI	2629681	2629859	CBG22164_2629681_2629859	-	-54.181	-0.304388
chrI	2629987	2630035	CBG22164_2629987_2630035	-	-6.063	-0.126313
chrI	2630098	2630143	CBG22164_2630098_2630143	-	-12.945	-0.287667
chrI	2631905	2632079	CBG22165_2631905_2632079	+	-46.985	-0.270029
chrI	2632251	2632776	CBG22165_2632251_2632776	+	-188.846	-0.359707
chrI	2633008	2633351	CBG22165_2633008_2633351	+	-120.183	-0.350388
chrI	2633454	2634168	CBG22165_2633454_2634168	+	-205.842	-0.288294
chrI	2634326	2634578	CBG22165_2634326_2634578	+	-100.958	-0.400627
chrI	2634800	2635069	CBG22165_2634800_2635069	+	-79.32	-0.29487
chrI	2636154	2637240	CBG22166_2636154_2637240	-	-396.527	-0.365126
chrI	2638123	2638771	CBG22166_2638123_2638771	-	-220.823	-0.340776
chrI	2638962	2647319	CBG22166_2638962_2647319	-	-3397.53	-0.406549
chrI	2639253	2639820	CBG22167_2639253_2639820	+	-231.55	-0.408377
chrI	2639972	2640096	CBG22167_2639972_2640096	+	-53.185	-0.428911
chrI	2640481	2640525	CBG22167_2640481_2640525	+	-13.51	-0.307045
chrI	2640878	2641104	CBG22167_2640878_2641104	+	-88.167	-0.390119
chrI	2646338	2646945	CBG22168_2646338_2646945	+	-206.276	-0.339829
chrI	2647524	2648564	CBG22166_2647524_2648564	-	-399.495	-0.38413
chrI	2648885	2649525	CBG22166_2648885_2649525	-	-235.793	-0.368427
chrI	2650452	2650506	CBG22169_2650452_2650506	-	-19.15	-0.35463
chrI	2650746	2651208	CBG22169_2650746_2651208	-	-189.666	-0.410532
chrI	2651462	2651677	CBG22169_2651462_2651677	-	-88.281	-0.410609
chrI	2651945	2652475	CBG22169_2651945_2652475	-	-164.653	-0.310666
chrI	2652891	2654394	CBG22169_2652891_2654394	-	-819.632	-0.545331
chrI	2654625	2655064	CBG22169_2654625_2655064	-	-147.135	-0.335159
chrI	2656442	2657156	CBG22170_2656442_2657156	-	-239.807	-0.335864
chrI	2657490	2657547	CBG22170_2657490_2657547	-	-11.925	-0.209211
chrI	2657760	2657809	CBG22170_2657760_2657809	-	-10.653	-0.217408
chrI	2658439	2658488	CBG22171_2658439_2658488	+	-9.187	-0.18749
chrI	2658815	2658866	CBG22171_2658815_2658866	+	-13.005	-0.255
chrI	2659275	2660116	CBG22171_2659275_2660116	+	-290.764	-0.345736
chrI	2660425	2660535	CBG22171_2660425_2660535	+	-26.829	-0.2439
chrI	2660798	2660841	CBG22171_2660798_2660841	+	-13.152	-0.30586
chrI	2660898	2661426	CBG22171_2660898_2661426	+	-241.608	-0.457591
chrI	2661854	2661907	CBG22172_2661854_2661907	-	-8.151	-0.153792
chrI	2661993	2662062	CBG22172_2661993_2662062	-	-14.61	-0.211739
chrI	2662149	2662951	CBG22172_2662149_2662951	-	-285.4	-0.35586
chrI	2663151	2663197	CBG22172_2663151_2663197	-	-9.951	-0.216326
chrI	2663314	2663374	CBG22172_2663314_2663374	-	-8.252	-0.137533
chrI	2663436	2664725	CBG22172_2663436_2664725	-	-608.654	-0.472191
chrI	2664895	2664941	CBG22172_2664895_2664941	-	-11.083	-0.240935
chrI	2666001	2667714	CBG22173_2666001_2667714	-	-586.228	-0.342223
chrI	2667827	2668417	CBG22173_2667827_2668417	-	-266.887	-0.452351
chrI	2668504	2668599	CBG22173_2668504_2668599	-	-25.338	-0.266716
chrI	2668826	2668871	CBG22173_2668826_2668871	-	-9.87	-0.219333
chrI	2668991	2669033	CBG22173_2668991_2669033	-	-10.037	-0.238976
chrI	2669095	2669147	CBG22173_2669095_2669147	-	-14.416	-0.277231
chrI	2669317	2670102	CBG22173_2669317_2670102	-	-420.327	-0.535448
chrI	2676779	2677184	CBG22177_2676779_2677184	+	-119.962	-0.296202
chrI	2678282	2678333	CBG22177_2678282_2678333	+	-14.42	-0.282745
chrI	2678531	2679393	CBG22177_2678531_2679393	+	-352.438	-0.408861
chrI	2679537	2679591	CBG22177_2679537_2679591	+	-12.125	-0.224537
chrI	2680883	2680934	CBG22178_2680883_2680934	-	-10.572	-0.207294
chrI	2681363	2682412	CBG22178_2681363_2682412	-	-467.736	-0.445888
chrI	2684091	2684320	CBG22179_2684091_2684320	+	-86.337	-0.377017
chrI	2684393	2686032	CBG22179_2684393_2686032	+	-650.771	-0.397054
chrI	2686247	2686291	CBG22179_2686247_2686291	+	-9.259	-0.210432
chrI	2686485	2686554	CBG22179_2686485_2686554	+	-14.198	-0.205768
chrI	2686618	2686726	CBG22179_2686618_2686726	+	-40.547	-0.375435
chrI	2686919	2686968	CBG22179_2686919_2686968	+	-12.944	-0.264163
chrI	2690212	2690586	CBG22180_2690212_2690586	-	-151.636	-0.405444
chrI	2693278	2693321	CBG22181_2693278_2693321	-	-10.186	-0.236884
chrI	2693402	2693679	CBG22181_2693402_2693679	-	-127.437	-0.460061
chrI	2693939	2693983	CBG22181_2693939_2693983	-	-6.963	-0.15825
chrI	2694072	2694119	CBG22181_2694072_2694119	-	-12.27	-0.261064
chrI	2694146	2694247	CBG22181_2694146_2694247	-	-25.894	-0.256376
chrI	2696008	2696201	CBG22182_2696008_2696201	+	-79.56	-0.412228
chrI	2696294	2696410	CBG22182_2696294_2696410	+	-37.652	-0.324586
chrI	2696510	2697465	CBG22182_2696510_2697465	+	-289.843	-0.303501
chrI	2697927	2697974	CBG22182_2697927_2697974	+	-7.419	-0.157851
chrI	2698055	2698102	CBG22182_2698055_2698102	+	-9.283	-0.197511
chrI	2698334	2698941	CBG22182_2698334_2698941	+	-185.585	-0.305741
chrI	2699002	2699089	CBG22182_2699002_2699089	+	-22.974	-0.264069
chrI	2699181	2699273	CBG22182_2699181_2699273	+	-14.462	-0.157196
chrI	2699411	2700303	CBG22182_2699411_2700303	+	-273.712	-0.306852
chrI	2701419	2701763	CBG22183_2701419_2701763	-	-179.022	-0.520413
chrI	2702024	2702077	CBG22183_2702024_2702077	-	-8.257	-0.155792
chrI	2702185	2702233	CBG22183_2702185_2702233	-	-11.371	-0.236896
chrI	2702592	2702740	CBG22183_2702592_2702740	-	-47.804	-0.323
chrI	2702841	2703145	CBG22183_2702841_2703145	-	-117.025	-0.384951
chrI	2703463	2703594	CBG22183_2703463_2703594	-	-44.876	-0.342565
chrI	2703716	2703760	CBG22183_2703716_2703760	-	-2.954	-0.067136
chrI	2703821	2704127	CBG22183_2703821_2704127	-	-140.881	-0.460395
chrI	2704405	2704934	CBG22183_2704405_2704934	-	-224.212	-0.423841
chrI	2705480	2706325	CBG22183_2705480_2706325	-	-356.01	-0.421314
chrI	2706605	2707746	CBG22183_2706605_2707746	-	-421.638	-0.369534
chrI	2708184	2709230	CBG22183_2708184_2709230	-	-399.779	-0.382198
chrI	2709421	2709717	CBG22183_2709421_2709717	-	-138.118	-0.466615
chrI	2709900	2710286	CBG22183_2709900_2710286	-	-138.707	-0.359345
chrI	2710732	2710996	CBG22183_2710732_2710996	-	-133.906	-0.50722
chrI	2711065	2711823	CBG22183_2711065_2711823	-	-408.953	-0.539516
chrI	2711988	2712946	CBG22183_2711988_2712946	-	-333.911	-0.34855
chrI	2713060	2714161	CBG22183_2713060_2714161	-	-430.492	-0.391001
chrI	2717450	2717744	CBG22183_2717450_2717744	-	-76.221	-0.259255
chrI	2737600	2737725	CBG22188_2737600_2737725	-	-27.759	-0.222072
chrI	2737952	2738674	CBG22188_2737952_2738674	-	-219.674	-0.304258
chrI	2738811	2739302	CBG22188_2738811_2739302	-	-172.983	-0.352308
chrI	2742890	2743290	CBG22190_2742890_2743290	-	-201.784	-0.50446
chrI	2743673	2745063	CBG22190_2743673_2745063	-	-669.272	-0.481491
chrI	2745580	2746329	CBG22190_2745580_2746329	-	-293.746	-0.392184
chrI	2748431	2748878	CBG22191_2748431_2748878	-	-157.77	-0.352953
chrI	2749620	2749803	CBG22191_2749620_2749803	-	-57.636	-0.314951
chrI	2750029	2750491	CBG22191_2750029_2750491	-	-140.053	-0.303145
chrI	2750794	2751728	CBG22191_2750794_2751728	-	-329.037	-0.352288
chrI	2751822	2751992	CBG22191_2751822_2751992	-	-48.616	-0.285976
chrI	2752166	2752396	CBG22191_2752166_2752396	-	-65.83	-0.286217
chrI	2777854	2778292	CBG22193_2777854_2778292	-	-210.968	-0.481662
chrI	2778476	2778527	CBG22193_2778476_2778527	-	-13.227	-0.259353
chrI	2778635	2778693	CBG22193_2778635_2778693	-	-10.275	-0.177155
chrI	2778929	2779580	CBG22193_2778929_2779580	-	-197.185	-0.302896
chrI	2779763	2780073	CBG22193_2779763_2780073	-	-84.549	-0.272739
chrI	2781081	2781425	CBG22194_2781081_2781425	-	-104.399	-0.303485
chrI	2781607	2781769	CBG22194_2781607_2781769	-	-48.02	-0.29642
chrI	2783753	2784023	CBG22195_2783753_2784023	+	-133.246	-0.493504
chrI	2784808	2786637	CBG22197_2784808_2786637	-	-746.354	-0.408067
chrI	2787168	2787223	CBG22197_2787168_2787223	-	-14.85	-0.27
chrI	2787481	2788418	CBG22197_2787481_2788418	-	-412.937	-0.440701
chrI	2789081	2789211	CBG22198_2789081_2789211	+	-42.447	-0.326515
chrI	2789345	2789474	CBG22198_2789345_2789474	+	-39.968	-0.309829
chrI	2789865	2790255	CBG22198_2789865_2790255	+	-110.987	-0.284582
chrI	2790469	2790804	CBG22198_2790469_2790804	+	-98.49	-0.294
chrI	2790905	2791538	CBG22198_2790905_2791538	+	-261.125	-0.41252
chrI	2791904	2791981	CBG22198_2791904_2791981	+	-21.991	-0.285597
chrI	2793491	2794038	CBG22199_2793491_2794038	-	-236.523	-0.4324
chrI	2794300	2795257	CBG22199_2794300_2795257	-	-425.596	-0.444719
chrI	2798048	2798095	CBG22202_2798048_2798095	+	-8.826	-0.187787
chrI	2802923	2802970	CBG22203_2802923_2802970	-	-8.826	-0.187787
chrI	2804023	2804096	CBG22204_2804023_2804096	+	-16.675	-0.228425
chrI	2804241	2804298	CBG22204_2804241_2804298	+	-11.178	-0.196105
chrI	2804420	2804472	CBG22204_2804420_2804472	+	-12.743	-0.245058
chrI	2804581	2805412	CBG22204_2804581_2805412	+	-292.248	-0.351682
chrI	2807080	2807272	CBG22205_2807080_2807272	-	-72.828	-0.379313
chrI	2807923	2807968	CBG22205_2807923_2807968	-	-11.315	-0.251444
chrI	2811738	2811784	CBG22207_2811738_2811784	+	-13.468	-0.292783
chrI	2812414	2812626	CBG22207_2812414_2812626	+	-90.151	-0.425241
chrI	2814489	2814796	CBG22209_2814489_2814796	-	-183.995	-0.599332
chrI	2814855	2814901	CBG22209_2814855_2814901	-	-4.701	-0.102196
chrI	2815577	2816062	CBG22210_2815577_2816062	-	-164.438	-0.339047
chrI	2816379	2816437	CBG22210_2816379_2816437	-	-15.122	-0.260724
chrI	2818369	2818598	CBG22211_2818369_2818598	-	-86.759	-0.37886
chrI	2818624	2819343	CBG22211_2818624_2819343	-	-263.746	-0.366823
chrI	2819451	2819590	CBG22211_2819451_2819590	-	-40.642	-0.292388
chrI	2819874	2819927	CBG22211_2819874_2819927	-	-13.927	-0.262774
chrI	2820056	2820101	CBG22211_2820056_2820101	-	-11.904	-0.264533
chrI	2820319	2821561	CBG22211_2820319_2821561	-	-396.904	-0.319568
chrI	2821689	2822884	CBG22211_2821689_2822884	-	-530.839	-0.444217
chrI	2824177	2824554	CBG22212_2824177_2824554	-	-154.882	-0.410828
chrI	2824692	2824741	CBG22212_2824692_2824741	-	-6.104	-0.124571
chrI	2825602	2825649	CBG22213_2825602_2825649	-	-5.717	-0.121638
chrI	2826292	2826334	CBG22213_2826292_2826334	-	-8.917	-0.21231
chrI	2826524	2826570	CBG22213_2826524_2826570	-	-4.468	-0.09713
chrI	2835936	2835988	CBG22216_2835936_2835988	-	-11.111	-0.213673
chrI	2838934	2840781	CBG22217_2838934_2840781	+	-757.47	-0.410108
chrI	2841034	2841173	CBG22217_2841034_2841173	+	-49.823	-0.358439
chrI	2841369	2845047	CBG22217_2841369_2845047	+	-1407.62	-0.382713
chrI	2847430	2848023	CBG22218_2847430_2848023	-	-188.806	-0.318391
chrI	2848329	2848689	CBG22218_2848329_2848689	-	-104.786	-0.291072
chrI	2849413	2849479	CBG22218_2849413_2849479	-	-19.163	-0.290348
chrI	2849524	2851070	CBG22218_2849524_2851070	-	-547.131	-0.353901
chrI	2851158	2851462	CBG22218_2851158_2851462	-	-87.568	-0.288053
chrI	2851721	2852954	CBG22218_2851721_2852954	-	-387.732	-0.314462
chrI	2853903	2856205	CBG22218_2853903_2856205	-	-772.285	-0.335484
chrI	2857964	2858193	CBG22219_2857964_2858193	+	-68.167	-0.297672
chrI	2858328	2859264	CBG22219_2858328_2859264	+	-310.916	-0.332175
chrI	2860681	2861447	CBG22219_2860681_2861447	+	-239.222	-0.3123
chrI	2865411	2865461	CBG22220_2865411_2865461	+	-9.326	-0.18652
chrI	2865533	2865581	CBG22220_2865533_2865581	+	-11.875	-0.247396
chrI	2865691	2867602	CBG22220_2865691_2867602	+	-767.992	-0.40188
chrI	2867818	2868666	CBG22220_2867818_2868666	+	-448.54	-0.528939
chrI	2868837	2868888	CBG22220_2868837_2868888	+	-14.373	-0.281824
chrI	2868972	2869142	CBG22220_2868972_2869142	+	-55.132	-0.324306
chrI	2869853	2870070	CBG22220_2869853_2870070	+	-82.515	-0.380253
chrI	2870155	2870203	CBG22220_2870155_2870203	+	-13.466	-0.280542
chrI	2870307	2870361	CBG22220_2870307_2870361	+	-14.053	-0.260241
chrI	2874286	2874336	CBG22222_2874286_2874336	+	-12.84	-0.2568
chrI	2874412	2875068	CBG22222_2874412_2875068	+	-192.5	-0.293445
chrI	2875357	2875403	CBG22222_2875357_2875403	+	-17.996	-0.391217
chrI	2875825	2876430	CBG22222_2875825_2876430	+	-164.353	-0.271658
chrI	2876541	2876603	CBG22222_2876541_2876603	+	-12.909	-0.20821
chrI	2876900	2877203	CBG22222_2876900_2877203	+	-105.874	-0.349419
chrI	2878563	2878736	CBG22223_2878563_2878736	+	-38.244	-0.221064
chrI	2878933	2879800	CBG22223_2878933_2879800	+	-331.677	-0.382557
chrI	2881498	2882287	CBG22224_2881498_2882287	-	-325.358	-0.412368
chrI	2882800	2883807	CBG22224_2882800_2883807	-	-468.616	-0.465358
chrI	2884062	2884815	CBG22224_2884062_2884815	-	-333.282	-0.442606
chrI	2889805	2890389	CBG25189_2889805_2890389	+	-254.449	-0.4357
chrI	2890409	2890487	CBG25189_2890409_2890487	+	-20.147	-0.258295
chrI	2894003	2894634	CBG25190_2894003_2894634	+	-270.334	-0.428422
chrI	2896266	2897208	CBG22228_2896266_2897208	+	-414.352	-0.439864
chrI	2897385	2897568	CBG22228_2897385_2897568	+	-60.744	-0.331934
chrI	2898162	2898211	CBG22228_2898162_2898211	+	-10.746	-0.219306
chrI	2898314	2898841	CBG22228_2898314_2898841	+	-228.214	-0.433044
chrI	2900295	2900733	CBG22229_2900295_2900733	-	-167.349	-0.382075
chrI	2900814	2900859	CBG22229_2900814_2900859	-	-14.722	-0.327156
chrI	2901102	2901828	CBG22229_2901102_2901828	-	-374.94	-0.516446
chrI	2902854	2902894	CBG22230_2902854_2902894	+	-8.87	-0.22175
chrI	2903029	2903078	CBG22230_2903029_2903078	+	-12.313	-0.251286
chrI	2903279	2903332	CBG22230_2903279_2903332	+	-17.997	-0.339566
chrI	2903642	2904292	CBG22230_2903642_2904292	+	-240.864	-0.37056
chrI	2904571	2904866	CBG22230_2904571_2904866	+	-120.812	-0.409532
chrI	2905257	2905301	CBG22230_2905257_2905301	+	-7.248	-0.164727
[truncated: 91,680 more rows]
