# Supplementary material
Source: HighWire-hosted journal article supplement (doi:10.1101/rna.067405.118)
Supplement: Supplemental_File_S2.xlsx [file Supplemental_File_S2.xlsx]

## Sheet: Key
Column	Description
Gene	Ensembl gene name. This dataset includes 20,735 intron-containing genes.
Chr	Gene chromosome.
Start	Gene start coordinate.
Stop	Gene end coordinate.
Strand	Gene strand.
EER-associated?	Is the gene an EER-associated gene (see Reich et al., 2018).
Most structured intron dG/nt (kcal/mol*nt)	Length-normalized predicted folding free energy of the gene's most structured intron.
IR nts	Number of nucleotides in each gene's non-coding sequences that overlap IR regions.
TR nts	Number of nucleotides in each gene's non-coding sequences that overlap TR regions.
RepeatMasker repeat nts	Number of nucleotides in each gene's non-coding sequences that overlap annotated RepeatMasker repeats.
Essential?	Is the gene an essential gene (see Materials and methods)?
Arm/Center	Does the gene occur in a distal arm or center domain of the chromosome? Note that in cases where a gene overlaps both, the domain where the majority of the gene occurs is given.
Longest intron length (nt)	The length of the gene's longest intron.
Most structured intron length (nt)	The length of the gene's most structured intron.
Max intron PATC score	The highest PATC score of any single intron found in the gene (see Materials and methods).
Embryo expression (FPKM)	Average expression in input RNAseq samples from embryo-stage wildtype C. elegans (see Reich et al., 2018).
Early larval expression (FPKM)	Average expression in input RNAseq samples from L1/L2-stage wildtype C. elegans (see Reich et al., 2018).
Late larval expression (FPKM)	Average expression in input RNAseq samples from L3/L4-stage wildtype C. elegans (see Reich et al., 2018).
Young adult expression (FPKM)	Average expression in input RNAseq samples from young adult-stage wildtype C. elegans (see Reich et al., 2018).
Oocyte expression (FPKM)	Average expression in fog-2(q71) young adult oocytes (see Ortiz et al., 2014).
Sperm expression (FPKM)	Average expression in fem-3(q96) young adult sperm (see Ortiz et al., 2014).
Intestine expression (FPKM)	Average expression of poly(A)+ mRNAs pulled down from mixed-stage worm intestinal cells using a 3x-Flag-tagged poly(A)-binding protein expressed under the ges-1 promoter (see Blazie et al., 2015). Note that transcripts with <1 FPKM were listed as having 0 expression.
Pharyngeal muscle expression (FPKM)	Average expression of poly(A)+ mRNAs pulled down from mixed-stage worm pharyngeal muscle cells using a 3x-Flag-tagged poly(A)-binding protein expressed under the myo-2 promoter (see Blazie et al., 2015). Note that transcripts with <1 FPKM were listed as having 0 expression.
NSM neuron expression (FPKM)	Average expression in NSM neurons isolated from tph-1::GFP-expressing cells from dissociated and FACS-sorted L1 larvae (see Spencer et al., 2014).

## Sheet: Supp_File_S2
Gene	Chr	Start	Stop	Strand	EER-associated?	Most structured intron dG/nt (kcal/mol*nt)	IR nts	TR nts	RepeatMasker repeat nts	Essential?	Arm/Center	Longest intron length (nt)	Most structured intron length (nt)	Max intron PATC score	Embryo expression (FPKM)	Early larval expression (FPKM)	Late larval expression (FPKM)	Young adult expression (FPKM)	Oocyte expression (FPKM)	Sperm expression (FPKM)	Intestine expression (FPKM)	Pharyngeal muscle expression (FPKM)	NSM neuron expression (FPKM)
2L52.1	chrII	1866	4663	+	No	-0.328309	0	0	192	No	ARM	594	369	54	17.9776	2.98774	4.35611	10.2324	7.07354	0.258879	0	0	0.195868
2RSSE.1	chrII	15268135	15273238	+	No	-0.37949	133	0	0	No	ARM	2069	764	24.2378	48.1518	15.3529	9.78673	7.24309	14.3209	0.339965	2.5	0	60.047
2RSSE.2	chrII	15274314	15275613	+	No	-0.472641	437	176	0	No	ARM	512	512	2.34043	16.8288	3.90388	1.25484	0	0.857585	0.0154968	0	0	27.7461
2RSSE.3	chrII	15277813	15278499	-	No	-0.334234	686	0	0	No	ARM	74	47	1.2766	0	0	0	0	0	0	0	0	0
3R5.1	chrIII	13777588	13781032	+	YES	-0.288916	0	0	290	YES	ARM	443	443	86.2483	14.6766	11.2808	8.64005	12.7294	52.8368	16.7681	0	0	7.6013
3R5.2	chrIII	13782485	13783358	+	No	-0.298268	141	0	393	No	ARM	426	426	80.5305	0.953801	4.39667	1.27067	0	0	0	0	0	0
4R79.1	chrIV	17486945	17490461	-	No	-0.33026	0	0	0	YES	ARM	1188	457	35.069	6.36067	0.842269	1.90503	0	0.0165958	0.0139112	0	0	0.519781
4R79.2	chrIV	17480359	17483294	-	No	-0.305091	0	0	0	No	ARM	552	552	37.037	2.5091	6.09776	3.54214	0.886957	0.0751271	0.153341	0	0	2.73175
6R55.2	chrX	17714379	17714756	+	No	-0.273531	0	0	0	No	ARM	81	81	11.6049	0	2.94509	0	0	0	0.0222234	0	0	0
AC8.1	chrX	242290	252767	-	No	-0.757078	2107	830	2290	No	ARM	2956	638	316.639	0.282202	0	0.563421	0.374684	0.37215	0.709303	0	0	0
AC8.10	chrX	237495	239177	-	No	-0.352952	0	0	1287	No	ARM	92	42	27.6	0	0	0	0	0	0	0	0	0
AC8.11	chrX	236066	236810	-	No	-0.173043	0	0	532	No	ARM	46	46	16.0455	0	0	0	0	0	0	0	2.14	0
AC8.12	chrX	239848	240779	+	No	-0.31281	0	0	689	No	ARM	100	100	43.7174	0	0	0	0	0	0	1.63	0	0
AC8.2	chrX	248342	249802	+	No	-0.694867	541	0	120	No	ARM	622	622	33.3553	0	0	0	0	0.0769686	0.0589383	0	0	0
AC8.3	chrX	228079	229761	-	No	-0.352952	0	0	49	No	ARM	92	42	27.6	0	0	0	0	0	0	0	0	0
AC8.4	chrX	226650	227394	-	No	-0.173043	0	0	378	No	ARM	46	46	16.0455	0	0	0	0	0	0	0	0	0
AC8.5	chrX	221016	225084	+	No	-0.345587	0	507	2330	No	ARM	1490	782	247.654	0	0	0	0	0.18038	0.0433108	0	0	0
AC8.6	chrX	217007	217496	-	No	-0.189021	0	0	0	No	ARM	48	48	33.0833	0	0	0	0	0	0	0	0	0
AC8.7	chrX	230432	231363	+	No	-0.31281	0	0	0	No	ARM	100	100	43.7174	0	0	0	0	0	0	0	0	0
AC8.9	chrX	232874	233777	-	No	-0.325435	0	258	0	No	ARM	330	46	316.639	0	0	0	0	0	0	0	0	0
AH9.1	chrX	2243225	2247000	-	No	-0.333191	0	0	0	No	ARM	1177	591	35.1776	1.2214	2.62845	1.39039	1.1741	0.138676	0.013443	0	0	32.3982
AH9.2	chrX	2255839	2258073	-	No	-0.327681	128	0	344	No	ARM	874	874	24.125	12.9236	2.53122	2.1716	7.10768	28.6407	0.357215	0	0	1.0735
AH9.3	chrX	2259143	2260518	-	No	-0.266842	0	0	376	No	ARM	355	355	27.9634	45.049	5.8183	10.9659	11.8451	19.7757	0.449147	2.61	0	32.4555
AH9.4	chrX	2271016	2274329	-	No	-0.315992	0	0	188	No	ARM	785	785	75.2806	0.353105	1.54547	0.304087	0.665099	0.0121723	0	0	0	12.5739
AH9.6	chrX	2263167	2267464	-	No	-0.327377	0	0	325	No	ARM	1594	1594	21.7299	1.90575	9.44083	3.33698	1.73848	0.0126847	0.00891357	1.08	0	14.9933
AH9.7	chrX	2243144	2244459	+	No	-0.279035	0	0	0	No	ARM	312	170	35.9615	4.80552	1.56062	1.68513	0.59114	1.07478	0.133462	0	0	0
B0019.1	chrI	12759575	12764950	-	No	-0.420612	234	0	1141	No	ARM	379	379	91.4382	6.94773	22.6374	21.0953	17.6402	0.255836	0.122066	0	1.25	65.8659
B0019.2	chrI	12773646	12782247	+	YES	-0.383339	451	500	1310	No	ARM	1673	1673	176.964	14.5869	7.23331	8.33045	12.3375	26.3034	5.49017	0	0	7.7119
B0047.1	chrII	2040275	2041620	-	No	-0.343345	0	0	120	No	ARM	168	168	67.8431	2.14478	1.21175	2.09166	2.39155	1.25913	1.04677	0	0	0.613221
B0047.2	chrII	2043027	2044109	-	No	-0.246865	0	0	0	No	ARM	52	52	53.549	0	0.781396	1.50121	1.12937	6.21564	2.29605	0	0	0
B0047.3	chrII	2044628	2046589	-	No	-0.284531	0	0	109	No	ARM	483	49	55.1449	1.86365	2.09294	3.36737	4.4814	14.2524	3.72393	0	0	0
B0047.5	chrII	2048065	2049180	-	No	-0.261962	0	0	0	No	ARM	53	53	51.6604	0.681347	0.397515	2.59912	0.904635	10.3365	3.83675	0	0	0
B0212.1	chrIV	3572466	3577625	+	No	-0.331429	0	194	787	No	ARM	909	49	66.5363	4.09615	1.93189	1.3574	0.604676	0.106792	0.113643	0	0	0
B0212.2	chrIV	3565196	3567810	+	No	-0.408322	0	225	0	No	ARM	857	394	54.5106	0	0	0	0	0	0	0	0	0
B0212.3	chrIV	3540183	3543598	+	No	-0.414774	0	0	1680	No	ARM	611	261	24.5516	15.4434	1.66842	3.87285	4.75361	12.3847	0.242158	0	0	0
B0212.4	chrIV	3543623	3547596	-	No	-0.365496	0	56	1052	YES	ARM	1281	347	91.4131	5.17581	4.26866	6.08317	3.04108	1.56431	4.17478	0	0	4.48285
B0212.5	chrIV	3550883	3557427	-	No	-0.380013	0	50	827	No	ARM	722	556	35.073	1.19934	5.19827	1.3198	0.160032	0.0429293	0.0384942	0	0	13.4665
B0212.6	chrIV	3570714	3571642	+	No	-0.304711	0	0	55	No	ARM	266	142	48.2068	0	1.56447	0	1.37109	0	0.00757705	0	0	0
B0213.10	chrV	3955750	3957700	-	No	-0.300415	0	0	0	No	ARM	172	53	42.5556	0	1.04422	0.915666	0	0.0301529	0.0527195	0	0	0.692456
B0213.11	chrV	3958223	3961174	-	No	-0.434071	150	75	175	No	ARM	762	762	35.502	0.321733	1.20723	0.558268	0.328938	0.441341	1.02543	0	0	0
B0213.12	chrV	3961744	3963800	-	No	-0.292612	0	0	0	No	ARM	214	214	28.2483	0	5.75917	0	0.65656	0	0.00218702	0	0	0
B0213.14	chrV	3964763	3967856	-	No	-0.406211	222	0	94	No	ARM	1260	1260	32.5063	0	8.041	12.1703	20.89	1.36351	0.46692	1.25	0	6.15816
B0213.15	chrV	3968117	3970499	-	No	-0.328545	0	0	0	No	ARM	383	55	47.6275	1.33313	14.9563	2.16597	1.46379	0.252619	0.0311414	6.63	0	26.162
B0213.16	chrV	3970696	3972986	-	No	-0.29864	0	0	260	No	ARM	531	531	30.6667	0	1.56415	0.265986	0.626887	0	0.00642308	0	0	0.166725
B0213.17	chrV	3978810	3979119	-	No	-0.181022	0	0	0	No	ARM	46	46	2.6087	20.2077	221.632	65.4426	29.6558	2.29043	0.0984801	0	0	0
B0213.2	chrV	3989075	3989755	+	No	-0.199351	0	0	95	No	ARM	77	77	14.7792	3.24897	92.6865	254.383	259.991	5.89439	2.44847	0	1.22	8.43841
B0213.3	chrV	3987884	3988302	+	No	-0.183902	0	0	0	No	ARM	82	82	40	0	45.3816	52.0448	95.6663	14.794	2.52856	1.45	0	105.408
B0213.4	chrV	3984397	3984834	+	No	-0.239609	0	0	38	No	ARM	69	69	25.5217	31.9239	241.855	310.287	118.72	12.5673	2.04008	1.91	0	123.302
B0213.5	chrV	3981964	3982730	+	No	-0.187771	0	0	0	No	ARM	48	48	1.25	9.80813	45.8115	50.9754	9.30183	0.70161	0.0127495	0	0	0
B0213.6	chrV	3980039	3980614	+	No	-0.192564	0	0	0	No	ARM	117	117	21.9658	68.6678	118.997	77.2473	18.4476	2.16335	0.418941	5.22	2.48	9.5666
B0213.7	chrV	3977248	3978796	+	No	-0.346139	0	0	125	No	ARM	309	309	38.6117	0	0	0	0	0	0	0	0	0
B0213.8	chrV	3974645	3976249	+	No	-0.418238	0	0	193	No	ARM	281	281	7.44681	0	0	0	0	0	0	0	0	0
B0213.9	chrV	3954023	3955445	+	No	-0.306517	0	0	100	No	ARM	174	174	12.1395	0	0	0	0	0	0	0	0	0
B0250.1	chrV	20479655	20480815	+	No	-0.309788	0	0	142	No	ARM	226	226	10.2212	303.64	1320.4	1792.57	1286.45	1449.22	520.705	1694.02	12.79	877.565
B0250.10	chrV	20487613	20489171	-	No	-0.27724	0	0	538	No	ARM	637	637	103.279	0	0	0	0	0.0214114	0	0	0	0
B0250.11	chrV	20471534	20472465	-	No	-0.348865	0	398	136	No	ARM	503	503	141.123	0	1.85226	0	1.15051	1.35924	0.85903	0	0	0
B0250.12	chrV	20466406	20468172	+	No	-0.285035	0	47	0	No	ARM	622	622	128.363	10.1342	4.78994	3.02647	1.59591	0.203811	0.0670238	3.16	0	0
B0250.2	chrV	20476716	20479058	-	No	-0.347102	0	245	624	No	ARM	1123	1123	215.62	8.02947	3.10983	1.98012	2.74294	0.502858	0.166181	1.69	0	64.842
B0250.3	chrV	20468317	20469382	-	No	-0.282743	0	0	247	No	ARM	226	226	24.3451	0	0.466139	1.0687	0	1.44245	0.452325	1.38	0	0
B0250.4	chrV	20458622	20464455	-	No	-0.427051	139	40	787	No	ARM	1089	705	57.3668	11.6461	1.91135	2.04745	3.11895	0.379137	0.0313369	0	0	0
B0250.5	chrV	20493892	20497315	+	No	-0.394033	624	474	164	No	ARM	965	965	712.376	52.5536	75.095	130.158	133.271	84.5009	31.2624	3.2	0	51.6012
B0250.6	chrV	20490739	20492454	-	No	-0.433277	0	612	133	No	ARM	863	863	33.9479	0	0	0	0	0	0	0	0	0
B0250.7	chrV	20473060	20475925	-	No	-0.428079	228	73	407	No	ARM	1024	546	86.2842	0	4.27327	2.9613	8.14426	7.25327	2.31511	0	0	0
B0250.8	chrV	20469671	20470454	-	No	-0.185283	0	0	43	No	ARM	46	46	8.62222	0.696004	1.99274	0	0	0.65215	0.699656	0	0	0
B0250.9	chrV	20480760	20485354	-	No	-0.439711	1076	570	1786	No	ARM	1274	766	143.23	3.50319	16.2235	4.59317	2.67471	0.628449	0.561525	0	0	90.0363
B0281.1	chrII	2313071	2314932	+	No	-0.491908	541	0	0	No	ARM	1180	1180	10.6254	0	0.858252	0	0	0	0	0	0	0
B0281.3	chrII	2307045	2308356	+	No	-0.271102	0	17	0	No	ARM	52	49	33.2653	0.399577	9.18068	14.5946	5.8375	0.25645	0.330169	27.21	0	0
B0281.4	chrII	2297851	2298798	-	No	-0.450988	0	0	55	No	ARM	119	86	6.38655	0	0	7.1513	13.4428	1.68333	0.0147985	0	0	0
B0281.5	chrII	2299844	2300887	-	No	-0.328179	0	0	0	No	ARM	235	235	21.68	230.03	2.20696	1.05006	19.3117	3.87106	0.00661329	0	0	1.97884
B0281.6	chrII	2301312	2302234	-	No	-0.200591	0	0	0	No	ARM	88	88	13.3673	0	1.49394	0.570852	0	0	0.0146989	0	0	0.649113
B0281.7	chrII	2310075	2311079	-	No	-0.337299	0	0	0	No	ARM	331	331	7.88218	0	0	0	0	0	0	0	0	0
B0281.8	chrII	2311494	2312852	-	No	-0.353478	0	0	166	No	ARM	230	230	13.8182	0	0	0	0	0	0	0	0	0
B0284.1	chrIII	4376474	4379172	+	No	-0.300298	0	107	485	No	ARM	476	449	33.2689	133.182	178.633	398.403	457.271	0.0777742	0.149249	7.63	0	4.85496
B0284.2	chrIII	4381710	4384113	+	No	-0.40289	38	0	0	No	ARM	364	263	12.9258	0.344271	2.64004	0.29648	1.00044	0.0595272	0.0433067	0	0	0
B0284.3	chrIII	4379339	4381013	-	No	-0.286736	0	0	314	No	ARM	993	993	37.8268	15.3945	5.33546	1.60583	1.48235	1.08271	0.245542	0	0	8.69152
B0284.4	chrIII	4384758	4387729	+	No	-0.41721	0	139	658	No	ARM	736	661	24.1304	0	0	0.449715	0	0.0192187	0	0	0	0
B0284.5	chrIII	4373150	4375295	+	No	-0.346807	0	0	116	No	ARM	517	517	10.3384	0.87384	0.354704	0	0	0	0.00756453	6.49	0	0
B0285.1	chrIII	4333368	4340455	+	No	-0.412599	126	0	812	YES	ARM	1903	294	126.444	33.9445	16.3294	14.797	24.3236	24.4994	5.18992	1.82	0	56.943
B0285.10	chrIII	4370856	4372792	+	No	-0.295985	0	0	0	No	ARM	303	273	26.1373	0.435081	0	0.374684	0.374684	0.0192238	0.116832	0	0	0
B0285.11	chrIII	4350796	4352137	-	No	-0.345521	0	0	164	No	ARM	79	48	13.7966	0	0	0	0	0.0200587	3.35087	0	0	0
B0285.3	chrIII	4341656	4343308	-	No	-0.407584	94	0	394	No	ARM	493	493	34.1704	18.3219	7.89511	10.349	12.4756	32.2525	5.39454	2.11	0	2.70098
B0285.4	chrIII	4343432	4345194	+	No	-0.273216	0	0	1067	No	ARM	297	102	93.0101	62.4967	38.6669	51.6505	64.1569	104.329	28.0896	1.83	0	11.956
B0285.5	chrIII	4345308	4350051	+	No	-0.288769	0	292	516	No	ARM	742	229	136.03	36.2474	13.6175	17.4273	27.9684	58.9875	5.21087	1.21	0	4.65068
B0285.6	chrIII	4352217	4355860	+	No	-0.307101	0	0	297	No	ARM	755	207	71.5102	0.36032	2.79748	1.61371	1.00158	0.0356855	0.0652314	0	0	0.812667
B0285.7	chrIII	4356510	4364944	+	No	-0.346276	78	0	625	YES	ARM	2306	2306	63.9983	109.685	23.3576	5.36124	7.20253	0.713989	0.215244	0	0	6.80459
B0285.8	chrIII	4365346	4367441	+	No	-0.275114	0	0	274	No	ARM	316	185	112	5.2265	8.17147	4.78187	2.60752	0.946742	0.780292	1.83	0	2.1469
B0285.9	chrIII	4367803	4370132	+	No	-0.420179	0	55	288	No	ARM	702	702	21.6329	13.1015	9.04072	8.85044	6.96865	11.9637	1.43201	0	0	0
B0286.1	chrII	4378658	4386355	+	No	-0.360609	0	0	635	No	ARM	3744	3744	52.7193	7.59671	5.33031	3.30621	1.99857	0.505059	3.95668	1.28	0	9.48543
B0286.2	chrII	4359085	4368285	+	No	-0.399642	0	244	278	No	ARM	934	458	101.732	2.24727	3.33435	1.76196	0.561529	0.0326867	0.0406888	0	2.72	2.70004
B0286.3	chrII	4369628	4372572	-	No	-0.40771	0	0	303	No	ARM	786	786	28.8702	15.181	42.7592	41.9749	23.9206	2.31651	1.68926	21.28	0	10.1602
B0286.4	chrII	4372743	4376745	-	No	-0.380109	0	0	290	YES	ARM	734	679	78.6713	186.948	73.5081	62.6596	42.1276	132.966	26.2194	22.75	1.07	229.757
B0286.5	chrII	4379885	4383290	-	No	-0.364812	0	0	305	No	ARM	1354	160	26.9153	0	0.815602	3.30232	4.4615	1.83874	0.936886	2.17	0	0
B0286.6	chrII	4368493	4447363	+	No	-0.453118	2278	2587	7265	No	ARM	153	153	25.3333	0	0	0	0	0.0126338	0	0	0	1.06185
B0294.1	chrX	1896656	1897337	-	No	-0.117345	0	0	142	No	ARM	55	55	19.4	0.998076	11.7761	2.00254	0.786613	0.0422783	0.0238445	5.56	0	42.9534
B0294.3	chrX	1892180	1893266	+	No	-0.525208	300	0	97	No	ARM	879	879	15.9249	0	0	0	0	0	0	0	0	0
B0302.1	chrX	17186065	17193219	+	No	-0.348383	0	41	0	YES	ARM	4490	4490	27.8845	22.9092	11.6985	9.94913	8.88177	9.66553	0.211353	3.09	1.17	76.93
B0302.2	chrX	17178464	17178918	+	No	-0.194711	0	0	0	No	ARM	45	45	2.44444	0	0	0	0	0.134547	0	0	0	0
B0302.4	chrX	17176415	17176703	-	No	-0.141855	0	0	0	No	ARM	69	69	7.13043	0	0	0	2.24849	0.804808	0	0	0	0
B0302.5	chrX	17193223	17195044	-	No	-0.266941	0	0	0	No	ARM	498	495	15.6948	9.09053	12.8499	28.856	21.4043	1.10815	1.23681	62.8	1.78	12.9574
B0304.1	chrII	4519065	4522434	+	No	-0.521174	0	0	356	YES	ARM	1710	317	16.7551	51.8505	13.0518	8.13719	5.14623	0.242737	0.026283	0	0	2.10592
B0304.2	chrII	4523611	4524523	+	No	-0.236265	0	0	0	No	ARM	55	49	63.8776	38.5373	3.63366	23.894	45.1942	144.595	19.7455	0	0	0
B0304.3	chrII	4512207	4522763	+	No	-0.363569	62	208	1083	No	ARM	542	422	84.3303	10.9893	2.38356	1.41145	0.673278	0.01713	0.00638225	0	0	1.49386
B0304.4	chrII	4522458	4523219	-	No	-0.209723	0	0	0	No	ARM	47	47	60.5455	7.95104	1.26842	6.71313	15.2861	42.5011	6.33713	2.23	0	1.03926
B0304.5	chrII	4529632	4531961	-	No	-0.33387	0	47	47	No	ARM	390	108	54.2222	1.79024	0.348158	0.399105	0	0.546598	0.00751577	0	0	0
B0304.6	chrII	4534738	4537238	-	No	-0.364093	0	0	525	No	ARM	960	960	62.5372	0.429787	0	0	0.496391	0.149864	0	0	0	0
B0304.7	chrII	4541861	4543665	-	No	-0.329255	0	0	167	No	ARM	440	440	18.4854	0	0	0	0	0	0	0	0	0
B0304.8	chrII	4524630	4527897	-	No	-0.404412	141	0	820	No	ARM	933	912	34.3015	0	0.994563	1.21993	2.18546	0.388265	0.0581816	0	0	0
B0304.9	chrII	4538984	4540728	-	No	-0.275004	0	0	0	No	ARM	263	263	36.8596	0	0.684547	0.38946	0.989394	0	0	0	0	0
B0310.1	chrX	493236	497214	+	No	-0.441177	316	46	926	No	ARM	881	789	39.7292	12.6846	29.0083	20.9857	11.3772	0.0492255	0.0263853	0	0	2.31091
B0310.2	chrX	501965	506944	-	No	-0.370455	0	0	833	No	ARM	1984	1984	22.6074	28.9043	9.63364	4.18448	3.77342	1.28924	0.0579224	0	0	7.77948
B0310.3	chrX	510899	514483	-	No	-0.347742	50	0	310	No	ARM	1238	1238	49.0475	0	8.77856	2.71822	1.46555	0.0128304	0.0115703	0	0	0.431397
B0310.5	chrX	525928	530177	-	No	-0.368261	0	0	450	No	ARM	1076	798	23.4958	26.5419	88.8889	59.8688	40.4309	0.69324	0.59878	0	0	39.9794
B0310.6	chrX	530625	530962	-	No	-0.15649	0	0	235	No	ARM	49	49	36.6122	5.32215	24.1627	53.1682	18.8389	0	0.14296	0	0	0
B0334.1	chrII	11485445	11486710	-	No	-0.30035	0	0	0	No	ARM	648	648	15.5262	4.62208	163.45	146.081	87.9246	7.51961	4.69702	2.1	1.6	155.852
B0334.10	chrII	11518423	11519507	+	No	-0.399398	0	0	127	No	ARM	535	535	15.2131	0	0	0	0	1.60825	4.24859	0	0	0
B0334.11	chrII	11493166	11495250	-	No	-0.264643	0	0	0	No	ARM	192	56	28.4115	22.6423	18.0691	17.4503	22.3191	74.4384	8.90268	5.21	0	25.5526
B0334.13	chrII	11488222	11489555	+	No	-0.362323	0	51	0	No	ARM	821	821	17.1108	16.7552	40.2516	29.0185	8.75602	0.362372	0.199353	0	0	4.93355
B0334.15	chrII	11496715	11498023	+	No	-0.42181	296	0	278	No	ARM	468	468	67.9402	48.1824	22.6208	25.841	22.9358	130.173	36.6154	0	0	152.724
B0334.2	chrII	11483136	11485295	-	No	-0.429679	66	0	364	No	ARM	551	551	34.7205	1.36733	2.65813	10.0549	12.684	11.4251	3.10542	0	0	23.8286
B0334.3	chrII	11489540	11492957	-	No	-0.35607	77	0	314	No	ARM	740	230	52.0217	38.7973	68.7342	80.2563	45.2497	54.4664	8.10747	27.38	1.42	29.9072
B0334.4	chrII	11495627	11496605	+	No	-0.35754	0	0	48	YES	ARM	51	50	6.31111	141.413	45.8977	64.3767	123.809	229.375	51.6658	15.13	2.34	58.1825
B0334.5	chrII	11496715	11499408	+	No	-0.244593	0	0	469	No	ARM	123	123	3.25	49.8681	23.4122	26.7451	23.7382	61.2005	19.8264	21.15	3.21	65.7601
B0334.6	chrII	11510610	11513826	+	No	-0.391067	274	0	553	No	ARM	835	404	48.9554	7.74464	6.49328	2.34405	0.906943	0.34032	0.0501493	0	0	6.09995
B0334.7	chrII	11515010	11518090	+	No	-0.362129	0	0	417	No	ARM	948	302	29.0755	0	0.779514	0	0	0.0398488	0.00237058	0	0	0
B0334.8	chrII	11519434	11526998	-	No	-0.406998	118	165	968	YES	ARM	1745	437	49.9389	17.4468	7.67757	7.84391	16.4893	70.4819	13.8564	0	0	15.6924
B0334.9	chrII	11480367	11482319	+	No	-0.340357	0	0	0	No	ARM	221	221	4	0	0.502068	0.262682	0.97918	1.03567	0.00219028	0	0	0
B0344.1	chrX	1597045	1597830	+	No	-0.284426	0	7	785	No	ARM	47	47	24.9362	0	0	0	0	0	0	0	0	0
B0344.2	chrX	1576629	1590890	+	No	-0.446765	295	705	1165	No	ARM	7354	7354	62.2583	28.9758	10.807	5.80578	2.57806	0.0150561	0.00598908	0	0	3.40568
B0348.1	chrV	48921	49619	+	No	-0.295488	0	0	85	No	ARM	371	371	54.4444	0	0	0	0	0.198729	0	0	0	0
B0348.2	chrV	45462	46923	+	No	-0.315583	312	102	405	No	ARM	1054	1054	33.8624	3.59231	9.16128	1.84412	0	0.391683	0.189334	0	0	8.15984
B0348.4	chrV	20824	43971	+	YES	-0.441597	199	819	3432	No	ARM	4717	924	94.4386	19.9129	38.3396	25.5072	12.7297	7.92917	2.27302	5.11	1.16	344.878
B0348.5	chrV	5689	6511	+	No	-0.148649	0	0	0	No	ARM	57	57	16	5.97714	1.32608	1.83492	0	0.875538	0.374932	0	0	0
B0348.6	chrV	6588	7822	-	No	-0.287886	0	0	0	No	ARM	158	158	32.5366	41.1946	25.8332	75.1587	144.416	893.417	246.711	2.54	0	135.964
B0353.1	chrIII	557514	572134	+	YES	-0.523624	1628	491	3997	No	ARM	7923	1915	56.0603	43.6034	15.2865	16.6092	9.44462	1.43766	0.581229	1.11	1.35	67.7017
B0395.1	chrX	16017446	16021677	+	No	-0.319433	356	0	282	No	ARM	1066	1066	38.4475	8.7299	7.7245	8.38693	8.69801	0.071968	0.065626	0	0	0
B0395.2	chrX	16030733	16034744	+	No	-0.391698	324	0	1060	YES	ARM	897	897	35.8421	30.0822	9.4161	7.7055	0.409833	0	0.0042435	0	0	24.6268
B0395.3	chrX	16034974	16039442	-	No	-0.386427	78	0	159	No	ARM	665	293	32.6205	21.4711	24.1894	27.7831	31.9019	3.36756	0.382643	2.19	0	18.6474
B0399.1	chrV	19600899	19605858	+	No	-0.519962	5313	2538	1753	No	ARM	6108	6108	146.551	0.312463	7.17628	2.01007	1.61994	0.0785575	0.0802456	0	0	427.994
B0399.2	chrV	19550985	19555842	-	No	-0.466348	640	1120	762	No	ARM	1065	402	53.2308	4.7407	5.13735	1.4538	0.244742	0.00938311	0.00937464	0	0	0.901655
B0412.1	chrIII	816239	821723	+	No	-0.454564	324	88	847	No	ARM	2019	1268	23.4101	0	7.37366	4.8441	2.27644	0.12801	0.047864	0	0	1.03891
B0412.2	chrIII	811821	813758	+	No	-0.284142	0	0	0	No	ARM	127	127	34.8852	0	33.824	6.83608	3.12719	0.278164	0.108748	1.39	0	19.2377
B0412.3	chrIII	795130	809434	+	No	-0.497419	828	246	1616	No	ARM	2666	955	272.27	23.6555	15.9587	21.9244	23.8407	58.6613	19.9455	2.21	0	16.7197
B0412.4	chrIII	794288	795072	+	No	-0.30293	0	0	0	YES	ARM	268	199	11.5933	478.14	1368.43	1211.21	880.934	954.143	483.21	222.92	0	528.859
B0432.1	chrII	297398	299527	+	No	-0.346144	0	0	71	No	ARM	1245	1245	25.4348	0.536288	2.27323	0	0	0.714568	0.12128	0	0	0
B0432.10	chrII	283886	286275	-	No	-0.324238	0	0	49	No	ARM	552	483	153.543	8.06914	4.33177	6.3437	11.0779	33.1779	6.39279	1.14	0	0
B0432.11	chrII	293863	294642	-	No	-0.222978	0	0	0	No	ARM	57	46	38.1522	0	0	0.66047	0.66047	0.0483983	18.4538	0	0	0
B0432.12	chrII	296274	297017	-	No	-0.331389	0	2	0	No	ARM	162	162	13.4938	0	0	9.54971	15.5508	0.189311	70.27	0	0	0
B0432.13	chrII	279086	282576	-	No	-0.389488	38	361	320	No	ARM	577	340	359.133	8.46194	2.799	5.57069	10.511	47.244	9.87654	0	0	0
B0432.14	chrII	264352	265841	+	No	-0.369026	50	0	435	No	ARM	965	965	131.861	0	11.2625	0	0	0.200137	0.0211574	0	0	402.555
B0432.2	chrII	290580	291861	+	No	-0.420303	0	0	0	No	ARM	366	366	114.409	72.4068	28.7172	52.7727	57.9952	178.724	82.7514	3.41	0	21.6589
B0432.3	chrII	288936	290399	+	No	-0.339914	0	120	0	No	ARM	615	615	128.721	48.0503	43.8077	92.3529	45.8925	40.1455	18.0535	10.91	0	51.6543
B0432.4	chrII	286624	288850	+	No	-0.379485	0	353	162	No	ARM	612	612	189.947	89.1466	95.6922	106.944	86.5341	69.8794	21.7403	5.88	0	11.0809
B0432.5	chrII	257818	261063	+	No	-0.275043	0	0	0	No	ARM	784	784	49.8248	0.279371	2.61112	0.482969	0.611198	0.0200174	0.0176761	0	0	2.07194
B0432.6	chrII	266446	269280	-	No	-0.427967	214	133	556	No	ARM	859	859	134.385	20.3169	4.27662	5.1617	8.75661	19.6225	2.30737	0	0	10.2723
B0432.7	chrII	269389	273966	-	No	-0.38553	0	912	311	No	ARM	681	681	142.566	23.8274	5.9565	5.60503	10.5109	18.3337	2.28976	0	0	28.2193
B0432.9	chrII	280555	283697	-	No	-0.33076	0	215	407	No	ARM	405	405	67.6815	15.3387	4.09595	8.535	13.4317	10.6897	3.52297	0	0	2.22651
B0454.1	chrII	3056643	3060251	+	No	-0.392358	243	219	890	No	ARM	2245	232	181.078	23.06	7.54527	2.86898	4.56235	14.4128	1.36663	1.08	0	53.4576
B0454.10	chrII	3046221	3048157	+	No	-0.377646	0	0	223	No	ARM	661	661	13.1321	0	0	0	0	0	0	0	0	3.49125
B0454.2	chrII	3051005	3052325	+	No	-0.377623	0	0	0	No	ARM	162	162	8.65116	0.640816	1.33333	0	0	0.0499919	0	0	0	1.18892
B0454.3	chrII	3048680	3050438	+	No	-0.438175	0	0	256	No	ARM	467	57	41.32	0	0.465346	0.383361	0	0	0	0	0	0.378351
B0454.4	chrII	3044325	3046118	+	No	-0.446101	0	0	0	No	ARM	592	592	26.9231	0	0.78414	0	0	0	0.00428341	0	0	0.985403
B0454.5	chrII	3038861	3040825	+	No	-0.398245	0	65	206	No	ARM	931	302	25.6842	0.691003	13.5133	21.5067	19.6866	0.550006	0.500364	0	0	0
B0454.6	chrII	3032782	3036125	+	No	-0.820445	0	253	531	No	ARM	362	362	64.3214	4.79909	5.09416	7.61768	10.447	0.264495	0.0835085	0	0	4.37861
B0454.7	chrII	3020563	3023434	-	No	-0.429007	212	416	1073	No	ARM	977	587	22.1908	0	0	0	0	0	0.00926175	0	0	0
B0454.8	chrII	3040942	3043409	-	No	-0.492191	0	0	155	No	ARM	461	461	35.7787	1.84079	0	0	0	0	0	0	0	0
B0454.9	chrII	3052377	3054351	-	No	-0.412996	0	0	237	No	ARM	510	510	36.9474	13.3315	6.56989	3.49363	3.89182	18.8645	0.394534	0	0	30.5931
B0462.1	chrV	18324993	18328763	+	No	-0.349247	0	0	760	No	ARM	793	793	14.2146	0.326264	1.20859	0.514806	0	0.00691292	0.0113214	2.12	0	0
B0462.2	chrV	18320081	18321499	-	No	-0.286838	0	48	0	No	ARM	182	160	22.1099	0	0	0	0	0	0.00747561	0	0	0
B0462.3	chrV	18318566	18319748	+	No	-0.241449	0	0	469	No	ARM	147	147	7.7415	17.9896	1.1773	0	1.15091	0.0950348	0	0	0	0
B0462.4	chrV	18329083	18331151	-	No	-0.3531	0	1512	145	No	ARM	1670	1670	16.5928	8.91255	7.64696	1.04991	0	0	0	0	0	0
B0462.5	chrV	18322186	18323299	-	No	-0.525406	150	0	0	No	ARM	286	286	4.55245	0	2.88554	3.92273	2.65882	0.0795938	0.0737024	0	0	0
B0491.1	chrII	11348365	11350312	+	No	-0.29907	0	0	0	YES	ARM	315	315	15.4381	24.4683	12.3176	16.1266	25.3966	73.853	30.0446	1.5	0	27.673
B0491.2	chrII	11336626	11337771	-	No	-0.195085	0	0	0	No	ARM	57	47	1.27273	0	91.6632	65.1465	9.58745	0.317668	0.0715762	0	0	0.311521
B0491.3	chrII	11338385	11339535	-	No	-0.447896	0	0	135	YES	ARM	259	259	8.40816	0	0.458517	15.5195	31.3126	1.54988	423.044	0	0	0
B0491.4	chrII	11340069	11343466	-	No	-0.407426	249	0	544	No	ARM	961	517	21.0021	7.98401	6.51995	1.56596	0.54504	0.0823908	0.0268054	0	0	1.45404
B0491.5	chrII	11343651	11345679	-	No	-0.266122	0	43	56	YES	ARM	518	518	67.1737	94.0503	123.798	155.657	113.937	238.753	87.5266	59.52	3.93	260.509
B0491.6	chrII	11345880	11347893	-	No	-0.205941	0	0	0	No	ARM	51	51	38.6383	18.1845	9.5685	9.9335	14.1357	38.2045	9.7116	3.48	0	25.1694
B0491.7	chrII	11350125	11351311	+	No	-0.256895	0	55	0	No	ARM	162	162	9.67284	21.4163	37.1019	45.9186	60.354	51.636	24.3745	0	0	20.0473
B0491.8	chrII	11358382	11370248	+	No	-0.488244	96	0	713	YES	ARM	6856	369	23.0058	1.43495	14.2371	4.42099	2.8604	0.0482837	0.0215821	0	0	44.9499
B0513.1	chrIV	13891649	13892333	+	No	-0.340279	0	0	34	YES	ARM	1526	1526	10.3191	80.3864	30.9428	17.5406	18.6112	44.0095	0.773131	8.93	5.83	667.823
B0513.12	chrIV	13853564	13854112	-	No	-0.281007	0	153	548	No	ARM	301	301	83.3754	0	0	0	0	0	0	0	0	0
B0513.2	chrIV	13882706	13884152	+	No	-0.369072	115	0	285	No	ARM	348	348	36.6149	87.8543	25.3777	42.0635	59.2389	167.342	64.7808	6.56	2.43	1.71963
B0513.3	chrIV	13882168	13882638	+	No	-0.244299	0	0	0	No	ARM	155	154	35.4935	571.058	2290.63	1683.14	1584.1	28547.2	14850	7641.26	46.77	572.342
B0513.4	chrIV	13880112	13881517	+	No	-0.340329	146	0	0	No	ARM	846	846	84.2695	0	1.99485	42.1129	100.451	136.981	41.5905	0	0	29.0884
B0513.5	chrIV	13868528	13876592	-	No	-0.362031	0	130	99	No	ARM	1674	127	57.2957	3.68106	47.0472	30.9273	31.1654	4.54819	9.08141	0	0	52.1216
B0513.6	chrIV	13854329	13857326	+	No	-0.37485	49	0	47	No	ARM	749	749	9.01602	0	0	0.219697	0	0	0.019448	0	0	0
B0513.7	chrIV	13847753	13852688	-	No	-0.446846	363	0	0	No	ARM	1571	436	48.9074	0	0	0	0	0.0156958	0	0	0	0
B0513.9	chrIV	13860423	13865171	-	No	-0.329705	413	662	1275	No	ARM	3803	3803	30.421	0.801408	49.1018	24.8497	21.6112	0.0542123	0.0583759	2.23	1.95	0
B0524.2	chrIII	1894092	1899847	+	No	-0.41126	351	1038	1965	No	ARM	1575	1040	93.8	0	0	1.45535	2.57628	0.101476	12.7767	0	0	0
B0524.3	chrIII	1887548	1889682	+	No	-0.430384	234	0	294	No	ARM	388	388	38.5556	0	0	0	0	0.0427196	0.808428	0	0	0
B0524.4	chrIII	1883597	1886209	-	No	-0.331543	0	0	1175	No	ARM	92	92	22.1047	0	0	0	0	0.033715	8.05854	0	0	0
B0524.5	chrIII	1891373	1893833	-	No	-0.355387	42	0	1078	No	ARM	1193	1193	175.756	0	0	1.45791	3.70371	0.363862	24.8969	0	0	0
B0524.6	chrIII	1902183	1905631	-	YES	-0.378748	245	100	1113	No	ARM	1984	1984	784	13.8759	14.9932	23.0824	26.8637	77.8455	22.3142	1.38	0	21.2368
B0545.1	chrIV	92015	110924	+	No	-0.425479	104	1260	3496	No	ARM	5042	1047	55.3694	37.3791	44.2464	25.766	14.6562	2.28446	0.722682	1.61	3.95	124.222
B0545.3	chrIV	86874	90082	-	No	-0.408416	0	256	347	No	ARM	560	512	104.419	0.448868	0	0.775991	2.0364	0.0594402	16.2941	0	0	1.16362
B0545.4	chrIV	109053	109943	-	No	-0.563447	0	0	79	No	ARM	76	76	17.0217	0.813536	0	2.01921	2.65435	5.61338	8.88046	0	0	0.769769
B0546.1	chrIV	3385634	3386904	+	No	-0.291954	0	123	268	No	ARM	525	525	54.5448	257.608	363.505	392.077	386.925	805.906	370.233	152.61	3.49	169.304
B0546.2	chrIV	3373390	3378129	-	No	-0.391896	320	407	785	No	ARM	707	671	434.396	54.6553	14.2527	12.56	22.0935	57.9961	11.5975	1.76	0	122.911
B0546.3	chrIV	3378787	3382831	-	No	-0.39062	0	104	1055	No	ARM	760	50	654.201	11.1045	14.3856	8.84372	9.05424	31.5008	6.51695	1.73	0	106.365
B0546.4	chrIV	3382944	3384144	-	No	-0.320209	0	52	634	No	ARM	359	43	181.51	9.21952	4.17782	2.15386	3.74976	34.9218	6.78797	41.9	5.44	801.09
B0546.5	chrIV	3388072	3390084	-	No	-0.33994	0	41	64	No	ARM	459	116	66.6514	0	0	0.782555	0.389826	0	0	0	0	0.372403
B0554.1	chrV	438401	438675	+	No	-0.172543	0	0	0	No	ARM	46	46	28.5217	2.74033	0	0	0	0	0	0	0	0
B0554.2	chrV	434768	436727	+	No	-0.408531	0	0	73	No	ARM	145	145	8.71875	0	0	0	0	0	0	0	0	0
B0554.3	chrV	434148	434402	+	No	-0.402281	0	0	0	No	ARM	89	89	1.34831	0	0	0	0	0	0	0	0	0
B0554.4	chrV	430612	433575	+	No	-0.380998	0	52	464	No	ARM	662	597	45.9396	1.54969	0	0	0	0.00731188	0	0	0	0
B0554.5	chrV	424440	426561	+	No	-0.452688	0	0	0	No	ARM	159	48	24.5455	0	4.35624	1.978	1.215	0.0997355	0.0449449	0	0	0
B0554.6	chrV	422498	424167	+	No	-0.346402	0	0	139	No	ARM	199	199	30.0962	0	0	0.481756	0.541925	0.00745036	0.00300346	0	0	0
B0554.7	chrV	437576	441024	-	No	-0.371215	0	352	328	No	ARM	1396	442	24.6222	0	0.590615	0.667922	0	0.125339	0	0	0	0
B0564.1	chrIV	13098953	13100592	+	No	-0.29685	0	0	184	No	ARM	214	214	70.729	34.0915	38.2143	45.9566	38.7064	95.5599	23.8355	4.78	0	10.3344
B0564.10	chrIV	13119071	13124363	+	No	-0.404695	0	58	215	No	ARM	1731	1731	34.0733	5.97051	7.58873	2.3886	0.678847	0	0.00359036	1.2	0	51.8018
B0564.11	chrIV	13105298	13106902	+	YES	-0.286836	0	59	0	No	ARM	59	55	42.2264	12.0737	5.91663	3.38415	10.1479	64.5898	13.8088	1.77	0	11.8411
B0564.2	chrIV	13107632	13111479	+	No	-0.349957	0	0	0	No	ARM	3037	3037	8.58333	7.78566	9.61073	16.1326	20.7003	67.7511	16.472	5.81	0	3.24207
B0564.3	chrIV	13108115	13109775	-	No	-0.245164	0	0	0	No	ARM	55	55	7.02222	0.92211	8.18309	1.76331	0.423974	0.111201	0.0686636	0	0	6.48758
B0564.4	chrIV	13111495	13113058	-	No	-0.271377	0	0	85	No	ARM	204	204	12.5957	0	0	0	0	0	0.0181468	0	0	0
B0564.6	chrIV	13129627	13133206	+	No	-0.336932	0	43	55	No	ARM	532	237	35	0	0	0	0	0	0	0	0	0
B0564.7	chrIV	13100688	13104855	+	No	-0.342183	85	0	596	No	ARM	756	596	143.382	14.8234	19.7606	28.1457	30.1988	71.1126	17.9536	2.17	0	4.47774
B0564.9	chrIV	13135219	13138798	+	No	-0.336932	0	43	736	No	ARM	532	237	35	0	0	0	0	0	0	0	0	0
BE0003N10.1	chrIII	1037498	1046264	+	No	-0.379823	239	3757	3066	No	ARM	1822	1822	175.423	8.16571	13.8856	13.158	13.9566	29.1511	7.50082	0	0	6.56955
BE0003N10.2	chrIII	1031303	1037202	-	No	-0.428269	0	1958	724	No	ARM	1269	301	181.855	33.8781	13.0794	32.5991	42.8299	88.8961	7.38414	0	0	17.8638
BE0003N10.3	chrIII	1046237	1060000	-	No	-0.694133	1448	1114	3254	No	ARM	1184	286	180.478	13.3696	1.58716	4.18579	0.646461	2.05706	0.450611	0	0	2.49647
BE10.1	chrIII	12787577	12789376	-	No	-0.467963	0	0	1161	No	ARM	541	160	5.05915	0	0	1.24184	3.1548	1.03452	101.749	0	0	0
BE10.2	chrIII	12793282	12798056	-	No	-0.492649	0	778	1312	No	ARM	1135	94	61.3912	30.6824	23.1536	13.4266	3.65788	0.203414	0.0152854	0	0	1.32055
BE10.3	chrIII	12807989	12811549	+	No	-0.369641	0	949	1216	No	ARM	870	870	53.5418	33.9655	0.741582	0.23837	1.96631	0.232491	0.00948365	0	0	0
BE10.4	chrIII	12813413	12816697	+	No	-0.444846	262	188	1413	No	ARM	866	551	88.9401	1.42584	1.01727	0	0	0.498658	0.292994	0	0	2.26418
BE10.5	chrIII	12806108	12806754	-	No	-0.426007	0	0	192	No	ARM	144	144	30.1569	0	0	2.15468	2.15468	0	27.0677	0	0	0
C01A2.1	chrI	13408785	13411440	-	No	-0.314597	0	0	426	No	ARM	489	489	9.89775	6.0363	0.821267	0.225506	0.531484	0.033315	0.00605975	0	0	20.6289
C01A2.2	chrI	13397256	13398517	+	No	-0.522677	0	0	1124	No	ARM	179	99	13.743	51.595	19.9416	7.2716	9.36454	0.453793	0.464982	0	0	7.84088
C01A2.3	chrI	13387805	13391439	+	No	-0.289304	0	199	1400	No	ARM	876	806	184.073	23.6456	43.5375	53.0571	37.5385	109.816	42.0402	1.4	0	12.3915
C01A2.4	chrI	13392104	13393990	+	No	-0.307351	0	40	368	No	ARM	880	134	142.207	37.4363	53.4622	32.3824	43.1939	58.4538	15.7778	3.1	5.28	38.0833
C01A2.5	chrI	13384740	13387073	+	No	-0.350545	139	136	1728	YES	ARM	968	968	81.0093	145.924	55.2122	81.9539	106.35	166.533	37.9847	11.61	2.35	18.5223
C01A2.6	chrI	13379905	13384360	+	No	-0.330761	0	0	1881	No	ARM	3480	3480	28.625	0	0	0	0	0.297221	0.334401	0	0	0
C01A2.7	chrI	13402435	13404088	+	No	-0.342625	0	0	128	No	ARM	678	678	23.3466	4.84757	38.7048	8.97773	3.05171	0.214008	0.113947	4.37	0	274.405
C01A2.9	chrI	13376864	13377338	+	No	-0.311794	0	0	82	No	ARM	199	199	3.9397	0	0	0	2.32338	0	0.0280317	0	0	0
C01B12.1	chrII	23327	24457	+	No	-0.20475	0	0	0	No	ARM	52	52	5.57692	5.8901	148.302	147.789	12.2999	0.237729	0.0389307	0	0	0
C01B12.2	chrII	19537	22170	+	No	-0.320866	0	5	358	No	ARM	842	842	32.5891	21.9606	16.1239	6.95646	6.96151	15.5974	1.83048	10.61	1.62	31.7891
C01B12.3	chrII	12984	16001	+	No	-0.338327	0	0	0	No	ARM	407	260	17.1818	15.9109	8.95314	4.71711	3.42405	0.0348505	0.0293045	0	0	4.62058
C01B12.4	chrII	6663	9233	+	No	-0.367567	0	0	325	No	ARM	633	633	41.1751	2.06535	3.52669	1.08001	2.25093	0.0944438	16.272	0	0	3.17034
C01B12.5	chrII	9807	11846	-	No	-0.305326	0	0	0	No	ARM	60	43	42.6522	1.69251	5.23048	2.5517	1.15756	0.013447	0.018113	0	0	0.923861
C01B12.8	chrII	23880	25435	+	No	-0.24396	0	71	61	No	ARM	51	50	32.6667	8.74009	46.8937	49.5039	7.02855	22.6273	10.2856	0	0	0
C01B4.1	chrV	2517528	2521770	+	No	-0.422097	0	196	1863	No	ARM	1329	793	33.3078	0	0	0	0	0	0	0	0	0
C01B4.10	chrV	2514232	2515592	-	No	-0.561224	44	0	0	No	ARM	254	254	32.9286	0	0	0	0	0	0	0	0	0
C01B4.2	chrV	2516551	2517307	+	No	-0.324392	48	0	325	No	ARM	480	480	58.7313	0	0	0	0	0	0	0	0	0
C01B4.3	chrV	2509634	2513267	+	No	-0.383914	0	103	1593	No	ARM	962	842	85.0998	0	0	0	0	0	0	0	0	0
C01B4.4	chrV	2505634	2509404	+	No	-0.387707	134	1069	2031	No	ARM	1385	844	46.7819	0	0	0	0	0	0	0	0	0
C01B4.5	chrV	2502762	2504913	+	No	-0.527964	289	0	747	No	ARM	689	689	42.3716	0	0	0	0	0	0	0	0	0
C01B4.6	chrV	2501049	2502425	+	No	-0.382846	0	0	207	No	ARM	188	188	8.43617	0	0	0	0	0	0	0	0	0
C01B4.7	chrV	2494233	2499000	+	No	-0.489587	152	1970	982	No	ARM	1033	1033	133.72	0	0	0	0	0	0	0	0	0
C01B4.8	chrV	2490510	2492700	+	No	-0.540353	241	0	439	No	ARM	657	657	12.5479	0	0	0	0	0	0	0	0	0
C01B4.9	chrV	2483002	2487784	-	No	-0.543455	1042	46	1157	No	ARM	959	849	166.131	0	0	0	0	0	0	0	0	0
C01B9.1	chrII	13771505	13778956	+	No	-0.414404	0	41	507	No	ARM	592	497	55.1453	2.05169	6.17175	5.61039	2.26213	0.0252177	0.0394819	1.23	0	0
C01B9.4	chrII	13770769	13783947	-	No	-0.242667	280	41	1337	No	ARM	51	51	7.05882	0	0	0	0	0	0.909134	0	0	0
C01B9.5	chrII	13781258	13781897	+	No	-0.314736	0	0	0	No	ARM	148	148	45.1081	0	0	4.48115	0	0	0.0516875	0	0	0
C01F1.1	chrII	4301608	4305289	+	No	-0.335112	0	136	347	YES	ARM	863	597	305.409	45.5735	26.7429	32.3921	46.2851	126.316	47.2818	3.54	0	10.041
C01F1.2	chrII	4299659	4301276	+	No	-0.268048	0	0	0	YES	ARM	440	62	182.252	11.7175	27.4348	39.8062	45.6652	103.146	27.9333	4.03	0	16.5148
C01F1.3	chrII	4298312	4299213	+	No	-0.567091	214	889	0	YES	ARM	800	394	30.0909	95.5158	28.3917	28.5335	8.54096	0.472054	0.628627	0	0	1.62904
C01F1.4	chrII	4276215	4279270	+	No	-0.392091	0	0	508	No	ARM	957	252	23.4844	1.33984	3.93483	0.496495	0.558505	0.959571	0.381832	0	0	5.87964
C01F1.5	chrII	4279790	4281830	-	No	-0.397417	0	147	0	No	ARM	727	727	54.228	18.4342	3.4371	13.0824	0.978636	0.199871	0.0734608	0	0	0.215468
C01F1.6	chrII	4282220	4288212	-	No	-0.604089	642	216	739	No	ARM	1172	1064	234.53	49.9055	32.7522	25.5702	35.0479	127.212	14.4865	1.5	0	66.3783
C01G12.1	chrII	14573539	14576487	+	No	-0.321811	0	45	0	No	ARM	614	614	123.296	15.2765	9.20134	5.66227	1.77715	7.04681	0.565049	0	1.01	19.2593
C01G12.10	chrII	14580255	14580968	-	No	-0.297989	197	0	0	No	ARM	353	353	4.96884	0	3.88764	14.3573	19.0709	2.18452	0.226387	0	0	0
C01G12.11	chrII	14580817	14581202	+	No	-0.0512857	133	0	0	No	ARM	42	42	1.66667	0	0	6.51098	6.14405	0	0.0371175	0	0	0
C01G12.12	chrII	14562382	14564056	-	No	-0.317701	0	496	62	No	ARM	167	87	86.0958	0.36738	0	1.06837	1.17935	0.725249	0.252195	0	0	0
C01G12.13	chrII	14576881	14578000	+	No	-0.356409	0	0	0	No	ARM	88	44	14.1364	0	0	1.98116	3.41847	0	14.5161	0	0	0
C01G12.2	chrII	14578209	14578522	+	No	-0.274489	0	0	0	No	ARM	45	45	13.1111	0	8.39869	7.76139	11.7952	0	0.507364	0	0	0
C01G12.3	chrII	14581389	14582285	-	No	-0.447191	0	0	0	No	ARM	157	157	10.5096	16.5721	0	12.1739	24.3208	3.90772	105.574	0	0	0
C01G12.5	chrII	14586451	14587432	-	No	-0.262882	0	0	35	No	ARM	51	51	0.980392	0.507558	0.433954	0	0	0.0121682	0.0167724	0	0	0
C01G12.6	chrII	14587881	14588186	-	No	-0.0826	0	0	185	No	ARM	45	45	0.222222	0	2.80401	27.8161	16.0819	0.209497	0.0961722	0	0	0
C01G12.7	chrII	14588545	14591818	-	No	-0.300425	0	0	66	No	ARM	723	723	20.8285	0.461843	3.90273	0.288906	0.250468	0.0166204	0.0182832	0	0	6.23667
C01G12.8	chrII	14593448	14597565	+	No	-0.361863	0	0	186	No	ARM	533	533	8.79174	0.482461	0	4.42183	8.73497	2.17881	183.489	0	0	0
C01G12.9	chrII	14578943	14580023	+	No	-0.256818	0	0	0	No	ARM	55	44	15.4545	0	0	1.00197	0.499128	0.0116602	21.1783	0	0	0
C02A12.1	chrV	3467449	3468498	-	No	-0.257943	0	47	125	No	ARM	264	264	41.2083	0	11.6408	1.70789	0	0.0703041	0.0666755	0	0	0
C02A12.10	chrV	3483087	3484778	-	No	-0.300303	0	0	209	No	ARM	571	571	76.5219	0	1.39484	0.609431	0.528348	0	0	0	0	0
C02A12.2	chrV	3469441	3470879	-	No	-0.268456	0	0	0	No	ARM	316	316	34.7647	0	0	0	0	0	0	0	0	0
C02A12.3	chrV	3478027	3480443	-	No	-0.382863	0	68	1143	No	ARM	1352	1352	26.8148	0	0	0	0	0	0	0	0	0
C02A12.4	chrV	3481415	3482599	-	No	-0.309581	0	0	0	No	ARM	167	167	18.14	0.681347	53.5742	35.8948	53.7328	8.65107	3.86714	976.53	1.62	5.0611
C02A12.5	chrV	3485545	3486954	-	No	-0.404799	0	0	0	No	ARM	144	144	26.7917	0	0	0	0	0	0	0	0	0
C02A12.6	chrV	3489224	3490532	-	No	-0.279382	0	0	0	No	ARM	207	207	24.3285	0	0	0.459696	0	0	0.00545905	0	0	0
C02A12.8	chrV	3471866	3475118	-	No	-0.29656	0	0	100	No	ARM	373	373	89.7143	0.845423	0	0	0	0	0	0	0	0
C02A12.9	chrV	3476401	3477593	-	No	-0.25966	0	0	0	No	ARM	103	103	28.9615	0	0	0	0	0	0	0	0	0
C02C6.1	chrX	15568847	15573627	+	No	-0.287534	0	0	204	YES	ARM	536	536	13.472	29.2976	45.8519	25.1972	18.3358	38.0517	0.938799	5.7	3.26	1170.32
C02C6.2	chrX	15542943	15545958	+	No	-0.33108	0	0	604	YES	ARM	3728	524	22.9123	6.05016	17.3804	4.9519	3.18891	0.7566	0.22362	4.41	2.93	83.5864
C02C6.3	chrX	15546638	15552165	-	No	-0.355934	0	0	286	No	ARM	1192	609	35.7792	34.6209	36.5846	25.3447	15.8504	4.39876	3.7086	2.64	10.25	143.896
C02D4.1	chrX	15284137	15286158	+	No	-0.370049	0	0	345	No	ARM	474	474	17.6727	7.61926	13.7954	10.337	3.23455	0	0	0	0	0
C02D4.2	chrX	15289884	15302894	-	No	-0.387315	0	448	1678	No	ARM	6257	676	29.9454	1.81209	6.12424	2.27375	1.01908	0	0.00662342	0	0	38.9777
C02E11.1	chrV	1042692	1048583	-	No	-0.538171	181	55	311	YES	ARM	777	490	26.449	67.8704	63.6134	54.4979	33.2397	57.7737	24.103	6.8	0	52.1331
C02H7.1	chrX	763767	766732	+	No	-0.329258	0	84	462	No	ARM	381	229	30.1942	1.86298	2.05314	1.16417	0.536484	0.228973	0.0105887	0	0	0
C02H7.2	chrX	731158	735671	-	No	-0.317644	0	183	0	No	ARM	1148	952	40.5827	0.671268	4.59535	0.580236	0.289042	0.00557702	0	0	0	133.76
C02H7.3	chrX	751209	759731	-	No	-0.435346	80	0	885	No	ARM	1493	52	63	7.685	9.83562	5.28968	2.42748	0.0508841	0.0366103	1.52	0	92.532
C03C10.1	chrIII	4083977	4086618	-	No	-0.299661	0	0	484	YES	ARM	280	280	25.6102	148.138	132.09	152.516	147.309	310.844	135.944	97.51	23.01	618.713
C03C10.2	chrIII	4091051	4093254	+	No	-0.381637	0	0	0	No	ARM	727	727	27.4812	0.581205	0	0.385837	3.22131	0.246016	39.7598	0	0	0
C03C10.3	chrIII	4093279	4094899	-	No	-0.322759	0	0	211	YES	ARM	116	116	24.3793	578.271	44.4123	50.7881	146.729	817.014	46.1417	19.74	9.2	93.2764
C03C10.4	chrIII	4096874	4098107	-	No	-0.232177	0	0	502	No	ARM	158	158	15.443	80.6253	29.7841	30.9292	52.6956	178.245	64.5082	2.2	1.95	4.88492
C03C10.5	chrIII	4090265	4090532	-	No	-0.2503	0	0	0	No	ARM	60	60	21.5	19.1959	0	0	2.37884	0.364376	0.764859	0	0	0
C03C10.7	chrIII	4096018	4097114	+	No	-0.295538	0	0	369	No	ARM	199	199	24.804	2.77998	0	0.521074	0.521074	0.707464	0.249859	0	0	0
C03H12.1	chrX	15689389	15696355	+	No	-0.420947	0	146	1352	No	ARM	1578	685	59.4646	14.4119	11.5448	11.0834	12.2261	5.00929	0.499414	1.53	0	11.4715
C03H5.1	chrII	402659	404235	+	No	-0.313725	0	0	0	No	ARM	102	102	17.6744	15.3718	39.0155	54.9467	27.3031	0.815798	0.584361	1.17	0	13.7453
C03H5.2	chrII	388832	392737	+	No	-0.331751	0	244	748	No	ARM	871	538	280.292	16.8729	31.638	29.3197	23.8114	94.058	34.1139	43.06	0	69.8909
C03H5.3	chrII	386193	387920	+	No	-0.291143	0	426	155	No	ARM	619	49	129.078	22.9512	22.4735	18.443	32.139	173.76	45.6373	2.15	0	17.8196
C03H5.4	chrII	375249	375835	+	No	-0.26862	0	0	0	No	ARM	53	50	15.04	0	0	1.17596	0	0.0861142	0	3.49	0	0
C03H5.5	chrII	382272	385354	-	No	-0.411285	0	379	185	No	ARM	565	239	26.6829	6.55334	13.1388	13.2386	7.30414	2.0344	1.3491	0	0	3.27249
C03H5.6	chrII	392813	399976	-	No	-0.371198	192	264	94	No	ARM	2991	495	36	1.83453	15.0157	5.45126	1.32292	0.0145851	0.00963053	1.06	0	2337.11
C03H5.7	chrII	380572	382344	+	No	-0.332831	0	0	374	No	ARM	402	402	27.3209	2.71322	0.65899	0	0.818653	0.108014	0	0	0	4.66243
C04C3.1	chrIV	3428896	3430330	+	No	-0.385693	0	60	438	No	ARM	296	296	35.3333	2.34014	0	0	0	0.00821773	0.0163603	0	0	0
C04C3.2	chrIV	3415679	3419231	+	No	-0.437347	90	0	1848	No	ARM	863	277	54.2973	0.688372	1.32877	0.643592	0.271628	0.128161	0.0319311	0	0	5.0225
C04C3.3	chrIV	3399666	3403904	+	No	-0.380154	68	673	384	No	ARM	943	641	255.54	36.6439	138.691	148.475	145.687	141.745	47.1226	52.8	20.72	487.472
C04C3.4	chrIV	3394362	3394642	+	No	-0.36196	0	19	0	No	ARM	100	100	17.06	0	0	0	3.54961	0	0.438248	0	0	0
C04C3.5	chrIV	3396577	3399120	-	No	-0.425771	0	46	0	No	ARM	445	445	39.93	0.972444	0.900612	1.5344	0.383206	0.57352	0.850532	0	0	0.788698
C04C3.6	chrIV	3419809	3422604	-	No	-0.453688	0	0	889	No	ARM	661	192	45.7083	0	1.47035	0	0	0	0.0142054	0	0	0
C04C3.7	chrIV	3432771	3433484	-	No	-0.29615	0	0	101	No	ARM	65	40	18.4615	0	0	0	0	0.0337794	0.00807768	0	0	0
C04C3.9	chrIV	3428084	3428531	-	No	-0.247318	0	73	9	No	ARM	170	170	72.9059	0	1.31596	3.00592	1.49738	0	5.12742	0	0	0
C04E12.1	chrV	3383920	3385142	+	No	-0.315738	0	0	116	No	ARM	122	122	41.2941	0	0	0	0	0	0	0	0	0
C04E12.10	chrV	3377532	3381921	-	No	-0.390396	0	0	549	No	ARM	582	359	84.3482	0	0.357549	0.203421	0.203421	0.00766747	0.00419367	0	0	0
C04E12.11	chrV	3386487	3388153	-	No	-0.511592	272	0	552	No	ARM	813	813	40.754	0	0.615745	0	1.07927	0.238158	0.0812136	3.55	0	5.0531
C04E12.12	chrV	3389326	3390949	-	No	-0.254885	0	0	0	No	ARM	140	87	50.6897	0	0.391077	0	1.47786	0.348155	0.0816339	0	0	0.992645
C04E12.2	chrV	3368069	3369874	+	No	-0.37095	0	0	419	No	ARM	839	839	22.6174	0	7.03468	11.3242	5.87219	0.696108	0.149097	0	0	16.8882
C04E12.4	chrV	3362780	3368318	+	No	-0.349258	68	70	591	No	ARM	1452	1293	32.6009	0.330755	17.789	11.385	8.55207	0.111911	0.0984767	0	0	4.47916
C04E12.5	chrV	3358595	3361090	+	No	-0.303248	0	0	200	No	ARM	303	210	59.5314	0	1.319	1.22046	0.707184	0.00596423	0.0025427	0	0	0
C04E12.6	chrV	3354665	3355510	-	No	-0.246562	0	0	0	No	ARM	96	96	30.9851	0	0	1.04027	0	0	0	0	0	0
C04E12.7	chrV	3355976	3357190	-	No	-0.330879	0	0	0	No	ARM	224	140	13.5179	0.637083	1.82404	1.10546	0.651349	0.902897	0.0745979	0	0	0.403408
C04E12.8	chrV	3370938	3372770	-	No	-0.323796	0	44	0	No	ARM	524	524	20.7451	0	0	0	0	0	0	0	0	0
C04E12.9	chrV	3374358	3377073	-	No	-0.74885	978	0	50	No	ARM	1357	1357	41.6168	0	0	0	0	0	0	0	0	0
C04E7.1	chrX	358091	360198	+	No	-0.324517	0	0	402	No	ARM	1138	1138	10.6957	0.756411	0	0	0	0.0274139	0	0	0	0
C04E7.2	chrX	353619	357934	+	No	-0.367757	0	0	912	No	ARM	649	366	37.0355	29.9709	14.0725	8.67767	9.60345	6.41353	0.718837	1.59	0	37.0152
C04E7.3	chrX	344126	346289	-	No	-0.298554	0	0	180	No	ARM	606	606	36.0495	1.84143	7.13634	3.94616	4.01167	0.335475	0.0860166	6.79	2.47	15.5227
C04E7.4	chrX	334309	341232	-	YES	-0.523075	729	328	1648	No	ARM	1879	1424	40.2353	1.54684	3.95646	2.39788	1.20008	0.329536	0.0757091	0	0	7.3001
C04E7.5	chrX	360778	362966	+	No	-0.49555	575	0	435	No	ARM	1632	1632	20.1778	0	0	0.811693	3.02568	1.34879	1.17394	0	0	0
C04H5.1	chrII	14534222	14535820	+	No	-0.281975	0	399	1152	No	ARM	438	438	250.804	16.0702	22.8707	35.4606	42.3282	80.5269	27.5295	2.9	0	61.5243
C04H5.2	chrII	14535743	14537504	-	No	-0.305555	0	64	0	No	ARM	661	661	9.92738	0	0.909967	0.869143	2.94779	3.91502	1.843	1.5	1.58	0
C04H5.3	chrII	14540743	14548716	-	No	-0.364135	0	177	987	No	ARM	1479	400	71.9067	0.654307	1.21856	0.306833	0	0.027997	0.0257323	0	0	1.83806
C04H5.6	chrII	14552429	14561521	-	No	-0.31033	46	179	1373	YES	ARM	2664	2664	155.735	24.781	9.54764	16.4436	20.6523	81.1924	17.5577	0	0	1.83043
C04H5.7	chrII	14537870	14539087	+	No	-0.299571	229	0	238	No	ARM	212	212	14.2736	0	0	21.4933	42.7117	2.18073	0.584739	0	0	0
C04H5.8	chrII	14550837	14552410	+	No	-0.319795	0	49	159	No	ARM	1219	1219	53.4865	1.36055	33.6266	26.7298	22.6955	0.211792	0.212033	0	0	4.77681
C04H5.9	chrII	14538333	14540407	-	No	-0.682424	667	0	238	No	ARM	1160	1160	16.5871	2.43942	0.77915	0.872488	0	0	0.00740086	0	0	0
C05D12.1	chrII	11411817	11415708	-	No	-0.302993	0	0	177	No	ARM	684	145	27.383	7.45048	5.92917	4.43067	2.46469	0.112721	0.0792752	0	0	0.49358
C05D12.2	chrII	11418249	11423317	+	No	-0.31769	0	44	0	No	ARM	694	694	32.427	0.28553	2.6268	3.98303	5.37321	0.0723814	0.0484136	1.38	0	0.877288
C05D12.3	chrII	11424685	11430535	+	No	-0.37599	0	0	0	No	ARM	903	310	15.7597	3.46717	22.3428	28.6695	21.588	0.743444	0.47503	12.36	0	0.0814932
C05D12.4	chrII	11429919	11432702	+	No	-0.313327	0	0	0	No	ARM	1249	1249	29.4235	28.7089	9.6165	8.64729	11.329	0.170981	0.243137	1.31	0	0
C05D12.7	chrII	11410049	11411911	+	No	-0.339104	0	48	0	No	ARM	1062	48	20.3591	0	10.4053	8.64701	5.97837	0.0939912	0.0108609	0	0	169.137
C05D9.1	chrX	1128980	1132922	+	No	-0.518827	0	100	0	No	ARM	861	323	56.0938	26.6916	19.7319	15.6305	17.7145	39.8344	3.09016	18.5	1	146.184
C05D9.2	chrX	1125166	1128285	+	No	-0.340263	0	42	0	No	ARM	540	175	29.7901	8.16471	14.186	8.27686	9.32905	0.270664	0.19927	4.17	0	0
C05D9.3	chrX	1111899	1116791	+	No	-0.424381	88	0	142	No	ARM	838	118	18.8103	40.7042	37.0596	21.6796	23.6546	0.243707	0.0864359	0	0	31.546
C05D9.4	chrX	1108063	1108413	+	No	-0.219891	0	0	0	No	ARM	46	46	12.186	0	1.9434	2.17621	0	0	0	0	0	0
C05D9.5	chrX	1104208	1106244	+	No	-0.305014	0	0	1609	No	ARM	482	418	30.5415	63.2479	21.9228	6.48699	6.06477	9.20258	0.77537	0	0	43.9042
C05D9.7	chrX	1117193	1119404	-	No	-0.407153	0	0	191	No	ARM	421	393	14.9643	97.5085	12.804	8.36923	9.21661	8.27923	0.0135032	0	0	11.4295
C05D9.9	chrX	1122417	1124231	-	No	-0.298426	0	0	65	No	ARM	1025	230	54.7052	0	8.32344	29.0303	36.0669	0.720309	0.28645	0	0	277.144
C05E4.1	chrV	762734	764658	+	No	-0.278552	0	0	87	No	ARM	414	58	80	14.7094	8.42601	12.1924	23.1823	1.86122	0.722051	0	0	3.85079
C05E4.10	chrV	734420	736272	-	No	-0.457219	0	0	0	No	ARM	470	155	38.9815	0	0	0	0	0	0	0	0	0
C05E4.11	chrV	736803	738871	-	No	-0.503937	0	0	0	No	ARM	618	95	41.2	0	0	0	0	0	0	0	0	0
C05E4.12	chrV	758039	761979	-	No	-0.493932	670	0	614	No	ARM	1521	1521	50.6531	2.89598	0.774199	0	0.874636	0.0720695	0	0	0	0
C05E4.13	chrV	751326	752780	-	No	-0.424398	0	0	0	No	ARM	123	123	52.1176	0.802917	0	0.390561	0.390561	0	0	0	0	0
C05E4.14	chrV	728309	734280	+	No	-0.333361	0	210	1306	No	ARM	4975	1676	82.4681	2.84687	2.86204	2.0097	1.63607	0.00967358	0	0	0	0
C05E4.2	chrV	756469	757893	+	No	-0.324025	0	0	0	No	ARM	162	162	36.8077	0	0	0	0	0	0	0	0	0
C05E4.3	chrV	753334	755049	+	No	-0.415914	0	0	89	No	ARM	210	209	44.3714	10.0147	2.01128	6.31421	10.403	0.302243	0.0559547	0	0	0.346768
C05E4.4	chrV	748344	750468	+	No	-0.303204	0	115	212	No	ARM	441	54	61.4449	0	0	0	0	0	0	0	0	0
C05E4.5	chrV	746397	747650	+	No	-0.366227	0	0	209	No	ARM	275	44	29.5127	0	0	0	0	0	0	0	0	0
C05E4.6	chrV	743648	745476	+	No	-0.320966	0	362	604	No	ARM	667	667	38.982	0	0.88323	0	0	0	0	0	0	0
C05E4.7	chrV	742120	743274	+	No	-0.312897	0	85	83	No	ARM	670	670	29.5164	0	0	0	0	0	0	0	0	0
C05E4.9	chrV	724207	728104	-	No	-0.367625	0	0	0	No	ARM	405	405	57.942	378.232	307.394	260.646	131.336	10.4523	4.13232	413.8	16.32	125.646
C05G5.1	chrX	14734376	14740019	-	No	-0.315604	0	41	718	No	ARM	2368	48	21.7445	10.4384	13.2486	7.09878	6.7907	0.15601	0.192596	0	0	22.2277
C05G5.2	chrX	14747250	14750321	+	No	-0.324243	76	15	300	No	ARM	449	449	12.8463	11.3288	4.165	4.01369	7.66927	13.2259	0.176533	3.51	0	33.7773
C05G5.3	chrX	14750787	14751942	-	No	-0.259044	0	0	44	No	ARM	140	45	27.5143	19.8784	14.058	7.87053	6.44615	0.675624	0.293795	1.06	0	20.7384
C05G5.4	chrX	14753954	14756390	+	No	-0.269596	0	0	251	No	ARM	297	225	9.52	78.2664	100.163	79.1319	55.2735	34.451	6.92026	21.67	0	137.389
C05G5.5	chrX	14756005	14760894	-	No	-0.505856	180	0	2125	No	ARM	1415	728	35.3566	5.03485	0.69022	0.780565	1.16964	0.0372347	0.0092738	0	0	5.16248
C05G6.1	chrIV	627536	633965	+	YES	-0.5017	810	192	1758	No	ARM	1619	1520	48.7225	4.56878	0.231148	3.52027	8.77456	2.79394	0.718793	2.43	0	0.198775
C06A12.3	chrIV	17427679	17429566	+	No	-0.383173	0	0	0	No	ARM	473	266	31.124	4.92158	8.36839	12.6184	9.8377	2.40098	2.47837	0	0	17.2891
C06A12.4	chrIV	17432939	17440054	-	No	-0.392784	0	0	592	No	ARM	1876	51	36.4746	0	1.04654	0.177966	0	0.0035917	0	0	0	0
C06A12.5	chrIV	17429718	17431931	-	No	-0.370885	0	0	0	No	ARM	52	52	4.04082	6.87498	14.231	13.1896	4.04631	0	0	7.05	0	1.02108
C06A12.8	chrIV	17437300	17438118	+	No	-0.311469	0	0	0	No	ARM	175	175	52.2222	0	0	0	0	0	0	0	0	0
C06G1.1	chrX	16633289	16637560	+	No	-0.33206	0	0	206	No	ARM	784	784	32.6501	36.365	41.9734	22.7502	8.95879	0.0902922	0.0565742	0	0	13.0946
C06G1.2	chrX	16621737	16622666	+	No	-0.191964	0	0	0	No	ARM	56	56	0.178571	9.10678	4.30386	0.478652	1.46376	0.0115579	0	0	0	11.6983
C06G1.4	chrX	16613375	16617594	+	No	-0.367696	0	0	183	No	ARM	560	560	17.552	137.577	49.3563	25.1989	22.4756	16.9311	0.73425	9.17	1.64	212.613
C06G1.5	chrX	16638171	16642988	-	No	-0.365143	0	5	191	No	ARM	524	524	48.8217	21.6057	32.9734	16.1384	10.4368	1.87925	1.03137	0	1.61	13.3077
C06H5.1	chrV	17895280	17896778	-	No	-0.327477	0	0	23	No	ARM	112	44	17.9643	0.771851	1.51138	1.90977	1.17667	0.134315	0.0499503	11.17	0	0.224104
C06H5.2	chrV	17899801	17901887	+	No	-0.554441	344	0	0	No	ARM	706	706	27.9858	0.359788	0.735652	0.352627	0	0.0811251	0.0116745	3.82	0	0
C06H5.6	chrV	17879817	17888958	-	No	-0.534094	518	3808	5617	No	ARM	2225	2225	104.961	15.5273	12.3325	15.8367	10.2923	0.823561	0.407565	2.9	0	0.556002
C06H5.7	chrV	17910290	17917218	+	No	-0.456042	910	836	3036	No	ARM	2183	192	42.2031	22.8524	28.3225	23.8248	19.5394	1.58908	0.589098	2.77	1.31	39.9573
C06H5.8	chrV	17919010	17921727	+	No	-0.603957	686	50	1612	No	ARM	1297	1297	43.003	1.67679	2.21012	3.74124	2.19361	2.85428	1.24733	0	0	5.50884
C06H5.9	chrV	17892399	17892680	+	No	-0.208702	0	0	238	No	ARM	47	47	1.91489	0	0	0	0	0	0.0917576	0	0	0
C07D8.2	chrX	1499	3024	+	No	-0.334315	0	495	338	No	ARM	178	178	14.6966	0	0	0	0	0	0	0	0	0
C07F11.1	chrI	444001	461610	+	YES	-0.430159	1858	201	2998	YES	ARM	3894	3894	425.795	53.9469	24.694	14.4108	18.3904	28.5474	3.3686	2.05	1.05	56.0484
C07F11.2	chrI	420924	423721	+	No	-0.41639	0	79	350	No	ARM	607	607	34.8	1.4065	4.12259	1.08357	0.811164	0.318187	0.345766	0	0	4.76646
C07G3.10	chrV	3502303	3503074	+	No	-0.3042	0	0	0	No	ARM	60	60	21.7333	0	3.45609	0	0	0.223004	0.0813183	0	0	12.6932
C07G3.11	chrV	3522492	3523370	-	No	-0.285314	0	0	0	No	ARM	185	185	44.4865	0	0	0	0	0.0737706	0	0	0	0
C07G3.2	chrV	3523578	3524572	+	No	-0.356101	0	0	226	No	ARM	248	248	19.2766	0.959747	4.11516	6.00752	0.981458	0.666291	0.317556	0	0	0
C07G3.3	chrV	3518185	3519798	+	No	-0.36763	0	0	79	No	ARM	362	362	21.6327	0	0	0	0	0.259419	0	0	0	0
C07G3.4	chrV	3512677	3514340	+	No	-0.33329	0	0	0	No	ARM	293	293	49	0	0	0	0	0	0	0	0	0
C07G3.5	chrV	3510174	3512035	+	No	-0.31658	0	0	167	No	ARM	431	50	29.8636	0	0	0	0	0	0	0	0	0
C07G3.6	chrV	3507818	3509248	+	No	-0.304978	0	0	0	No	ARM	146	93	15.7917	0.461336	0	0	0	0.054909	0.0336645	0	0	0
C07G3.7	chrV	3491359	3492595	-	No	-0.31562	0	0	0	No	ARM	134	92	39.8723	0	0	0	0	0.0178622	0	0	0	0
C07G3.8	chrV	3493633	3500939	-	No	-0.393472	362	0	2611	No	ARM	2176	2176	35.5539	0	1.54024	0	0	0.248347	0.0570571	0	0	1.38412
C07G3.9	chrV	3503126	3506349	-	No	-0.353231	0	50	379	No	ARM	549	376	60.8	8.60618	11.0544	27.4095	22.6825	33.0462	8.7176	1.68	0	7.73543
C08A9.1	chrX	17092643	17094149	+	No	-0.276225	0	0	0	No	ARM	414	160	30.7005	1.02365	0.951699	0.49793	0.49793	1.65691	0.591136	2.26	0	0
C08A9.10	chrX	17081028	17081970	+	No	-0.280979	0	0	0	No	ARM	193	193	23.2435	0	0	29.1582	57.438	0.190126	0.0538983	1.55	0	0
C08A9.11	chrX	17083087	17083668	+	No	-0.418829	0	119	0	No	ARM	76	76	13.6579	1.02983	0	5.00936	11.6642	1.80643	2.54805	0	0	0
C08A9.3	chrX	17087807	17093225	-	No	-0.317228	0	54	1392	No	ARM	1771	448	23.6098	0	0	0	0	0.0108684	0.0242724	0	0	0
C08A9.6	chrX	17094208	17096463	-	No	-0.284896	0	0	0	No	ARM	595	595	28.058	10.3232	2.97148	2.46654	4.64177	9.56702	0.0944551	1.58	0	8.96058
C08A9.7	chrX	17099037	17100678	-	No	-0.298196	0	0	94	No	ARM	270	270	10.1926	15.6344	0	0.328767	1.16228	0.470081	0.0118914	0	0	4.02459
C08A9.8	chrX	17102770	17104797	-	No	-0.316049	0	0	257	No	ARM	588	144	50.5408	0.919726	0	0.472144	0	1.61988	0	0	0	1.98709
C08A9.9	chrX	17106531	17108296	-	No	-0.195841	0	0	341	No	ARM	119	69	18.6471	0	0	0.263015	0.575266	3.14418	0.00719073	0	0	0
C08E3.1	chrII	1633811	1634095	+	No	-0.221979	47	0	0	No	ARM	47	47	6.85106	0	67.2831	11.8457	4.77363	0	0	1.32	0	6.79996
C08E3.10	chrII	1619803	1621268	-	No	-0.267935	0	0	0	No	ARM	77	77	15.2727	0.333346	0.96659	2.40194	0.324297	0.119878	0.00665893	1.95	0	0
C08E3.11	chrII	1621648	1622854	-	No	-0.31236	29	0	333	No	ARM	759	759	49.581	0	0.815483	0	0	0	0	0	0	0
C08E3.12	chrII	1623913	1624679	-	No	-0.227628	0	0	0	No	ARM	43	43	15.9535	0	0	0	0	0	0	0	0	0
C08E3.13	chrII	1632000	1633856	-	No	-0.632816	1171	0	94	No	ARM	1498	1498	20.9306	0	344.494	79.3532	3.16669	0	0	67.82	1.72	7.44261
C08E3.14	chrII	1625972	1626890	+	No	-0.290109	0	0	0	No	ARM	55	55	19.2558	0	0	0	0	0	0	0	0	0
C08E3.15	chrII	1627485	1627890	-	No	-0.265418	0	0	0	No	ARM	201	201	16.9453	0	0	0	0	0	0	0	0	0
C08E3.2	chrII	1611337	1612517	+	No	-0.316786	0	0	0	No	ARM	201	201	41.9149	0	0	0	0	0	0	0	0	0
C08E3.3	chrII	1604672	1606150	-	No	-0.540343	0	0	0	No	ARM	539	539	23.2727	6.99976	0	0	0.589724	0.0122664	0	0	0	0
C08E3.4	chrII	1606596	1607613	-	No	-0.163458	0	0	0	No	ARM	48	48	3.75	0	0.523454	0	0	0.0596394	0	10.36	0	0
C08E3.5	chrII	1607881	1609008	-	No	-0.277633	0	0	0	No	ARM	55	49	20.6	0	2.26253	0.408469	1.44405	0.124638	0.0139132	12.31	0	0
C08E3.6	chrII	1609261	1610722	-	No	-0.283408	0	0	0	No	ARM	127	49	102.394	0	0.598066	0	0	0.0466209	0.0145284	36.61	0	0
C08E3.7	chrII	1612794	1614066	-	No	-0.3212	0	0	0	No	ARM	80	40	27.9	0	0	0.378157	0	0	0.00958531	7.96	0	0
C08E3.8	chrII	1614799	1616470	-	No	-0.272034	0	0	0	No	ARM	149	149	30.9524	0	0	0	0	0	0.00465182	41.9	0	0.200671
C08E3.9	chrII	1616918	1619011	-	No	-0.328863	0	0	562	No	ARM	628	628	33.3424	0.529937	1.47879	0.351803	0.351803	0.360714	0.271773	0	2.04	0
C08E8.1	chrV	18361006	18362515	-	No	-0.335171	731	50	355	No	ARM	1012	1012	69.6877	0	3.02266	2.04334	0	0	0	0	0	0
C08E8.10	chrV	18339091	18339879	-	No	-0.392653	0	0	125	No	ARM	467	467	36.2848	0	0	1.30175	1.99043	0.866445	0.0695414	0	0	24.2429
C08E8.11	chrV	18350992	18352644	+	No	-0.348596	0	93	0	No	ARM	1087	1087	66.4517	0	0	0	0	0	0	0	0	0
C08E8.2	chrV	18353481	18355814	-	No	-0.451617	536	2	126	No	ARM	939	939	26.2228	0	1.2156	0	0	0.324653	0.00840479	0	0	0
C08E8.3	chrV	18350119	18350527	+	No	-0.311417	0	0	168	No	ARM	60	60	29.0667	1.22514	1.04747	0	0	0	0.0210016	0	0	0
C08E8.4	chrV	18371817	18373503	+	No	-0.297295	0	36	0	No	ARM	373	315	56.7453	1.78102	15.481	7.45208	4.33272	0.323272	0.0748197	0	1.83	3.31666
C08E8.6	chrV	18367985	18368394	-	No	-0.233992	0	0	117	No	ARM	124	124	34.7903	0	0	0	0	0	0	0	0	0
C08E8.7	chrV	18344720	18345060	-	No	-0.244158	0	0	83	No	ARM	101	101	3.20792	0	0	0	0	0	0	0	0	0
C08E8.8	chrV	18358006	18359527	+	No	-0.332456	0	311	666	No	ARM	719	719	55.2219	0	0	1.01918	0	0.34926	0	0	0	0
C08E8.9	chrV	18364829	18365196	+	No	-0.261387	0	0	321	No	ARM	124	124	53.4274	0	0	0	0	0	0	0	0	0
C08F1.1	chrII	1797857	1801383	+	No	-0.300173	444	126	1381	No	ARM	693	231	24.2412	0	0	0	0	0	0	0	0	0.631293
C08F1.10	chrII	1785267	1786283	-	No	-0.15613	0	0	0	No	ARM	69	69	23.3623	193.914	0.535615	0.879238	8.91236	0.322519	0	0	0	0
C08F1.11	chrII	1783281	1784448	-	No	-0.308914	0	0	0	No	ARM	162	162	37.5873	32.2463	0.538458	0	1.04548	0.092782	0	0	0	0
C08F1.2	chrII	1791986	1792968	+	No	-0.23275	0	0	0	No	ARM	58	44	32.8214	0	0	0	0	0.0578989	0	0	0	0
C08F1.3	chrII	1789186	1790223	+	No	-0.166365	0	0	0	No	ARM	52	52	11.0385	16.0171	0	0	0.999837	0.0181646	0	0	0	1.76008
C08F1.4	chrII	1776315	1778545	+	No	-0.352666	1176	0	0	No	ARM	7659	7659	25.1707	5.43422	28.9167	22.9031	8.44251	0.13482	0.0861222	3.78	0	0
C08F1.5	chrII	1778777	1782313	-	No	-0.367649	211	0	0	No	ARM	285	285	28.1935	4.66374	10.3338	10.683	5.56154	0.0831361	0.0503998	3.38	0	0
C08F1.6	chrII	1787220	1788193	-	No	-0.162213	0	0	0	No	ARM	61	61	30.918	160.444	0.399694	0.454797	4.77427	0.439724	0	0	0	0
C08F1.7	chrII	1802112	1803308	-	No	-0.379424	0	0	0	No	ARM	59	59	9	0	0	0	0	0	0	0	0	0
C08F1.8	chrII	1804162	1808323	-	No	-0.473785	254	104	538	No	ARM	951	832	21.7151	3.53852	0.270089	0	0	0	0	0	0	92.18
C08F11.1	chrIV	13623810	13625518	+	No	-0.290651	0	0	0	No	ARM	673	673	31.4175	0.653507	28.603	12.5849	3.68088	0.0130361	0.0304194	0	0	9.87195
C08F11.10	chrIV	13648012	13649186	-	No	-0.404818	0	0	590	No	ARM	308	308	5.15584	0	0	3.04614	9.02777	0.591532	156.404	0	0	0
C08F11.11	chrIV	13646706	13647634	-	No	-0.262152	0	0	134	No	ARM	227	46	22.8722	0	0	320.239	792.819	4.75969	0.11053	0	0	0
C08F11.116	chrIV	13632052	13632679	-	No	-0.33122	0	0	30	No	ARM	350	350	10.0371	0	1.31596	3.54789	1.49738	0.177105	0	0	0	0
C08F11.12	chrIV	13650988	13651487	-	No	-0.296948	0	0	111	No	ARM	349	349	24.3922	0	0	0	15.4843	0.0615755	0	0	0	0
C08F11.13	chrIV	13607415	13609859	-	No	-0.327632	137	0	171	No	ARM	845	845	30.7053	5.62538	34.5447	16.7996	5.67405	1.67137	0.185429	300.72	1.42	2.82596
C08F11.14	chrIV	13612782	13618037	-	No	-0.343153	0	105	429	No	ARM	596	596	33.1429	0	0	0.854995	0.905957	0.0267838	15.9753	0	0	0
C08F11.17	chrIV	13649737	13650314	-	No	-0.213613	0	0	236	No	ARM	80	80	13.7619	0	0	0	0	0	0	0	0	0
C08F11.2	chrIV	13621806	13623110	+	No	-0.211489	0	0	111	No	ARM	137	137	28.0876	0	0.47009	0.526404	0	0	0	0	0	0
C08F11.3	chrIV	13619483	13621489	+	No	-0.311975	0	42	0	No	ARM	435	435	37.9639	0	7.17035	4.35945	2.49664	0	0.0150376	23.88	0	0
C08F11.4	chrIV	13626744	13632673	+	No	-0.495109	1154	0	195	No	ARM	4578	4578	18.7534	0	0	0	0	0	0	0	0	0
C08F11.5	chrIV	13633414	13635196	+	No	-0.292768	0	0	0	No	ARM	374	284	44.1738	0	6.42553	10.2834	7.0355	0.237836	0.141578	9.57	0	0
C08F11.7	chrIV	13637263	13638501	+	No	-0.31602	0	0	0	No	ARM	198	198	17.7475	0.546071	0.575087	0.470267	0.470267	0.821273	3.73627	0	0	0
C08F11.8	chrIV	13639241	13644377	+	No	-0.300916	0	0	0	No	ARM	913	407	53.6243	26.8518	138.39	88.7263	44.6115	0.366418	0.30767	2.35	0	0
C08F11.9	chrIV	13644438	13645899	-	No	-0.281602	0	0	426	No	ARM	354	354	38.9124	0	0	0	0	0.0976915	0	0	0	0
C08G5.1	chrII	734656	738673	-	No	-0.263302	0	0	131	No	ARM	522	63	29.6507	0	0	0.13635	0.13635	0.00855167	1.24446	0	0	0
C08G5.2	chrII	739556	740906	-	No	-0.422406	0	0	119	No	ARM	283	283	44.417	0	0	0	0	0.0426168	15.715	0	0	0
C08G5.3	chrII	743105	745135	-	No	-0.268889	0	207	392	No	ARM	643	45	51.102	0	0	0	0.554145	0.0655097	6.90564	0	0	0
C08G5.4	chrII	745468	750171	-	No	-0.3425	0	108	235	No	ARM	2362	206	48.2837	4.68814	19.3378	10.1564	3.25895	0.775132	0.278026	2.04	0	231.777
C08G5.5	chrII	756200	764859	-	No	-0.339745	0	108	872	No	ARM	5364	5364	34.7732	11.1031	8.58757	3.74164	0.571253	0.156455	0.080231	1.85	1.45	0
C08G5.6	chrII	770559	772124	+	No	-0.325617	0	0	0	No	ARM	352	321	91.6143	0.914781	1.48529	1.21909	0.607284	0	0	0	0	1.04646
C08G5.7	chrII	761588	765324	-	No	-0.338019	0	0	604	No	ARM	572	572	63.4475	3.82931	4.21598	1.79573	0	0.0346031	0.0122452	0	0	829.219
C09B7.1	chrX	2673462	2682353	+	No	-0.368347	0	0	566	No	ARM	3261	3261	26.1066	0.492721	0.851414	0.638063	1.32984	0.250106	0.874899	0	0	114.46
C09B7.2	chrX	2668128	2670584	+	No	-0.410327	93	0	876	No	ARM	1118	679	38.4365	30.8047	26.1209	32.6886	22.6929	11.027	1.63563	3.15	0	31.2587
C09D1.1	chrI	4080569	4090429	+	No	-0.413954	109	318	1095	No	ARM	5927	1147	56.7612	18.0419	80.7087	47.0159	40.1814	0.570737	0.329512	2.04	2.78	18.2951
C09D1.2	chrI	4071800	4072850	-	No	-0.288161	0	0	26	No	ARM	211	211	27.1564	1.22553	1.10909	0.722633	0	0	0.0261541	1.42	0	0
C09D8.1	chrII	11002920	11011723	+	No	-0.418039	200	203	212	No	ARM	7858	711	34.802	32.0737	20.9959	8.51567	10.0564	11.4133	0.975142	1.43	1.42	439.297
C09E10.2	chrX	984617	991232	-	No	-0.377774	0	137	0	No	ARM	1084	717	47.6084	8.14187	16.9743	7.49751	1.64236	0.0410816	0.0857058	0	0	192.313
C09E8.1	chrII	556483	564123	+	No	-0.463862	62	564	174	No	ARM	1528	254	125.611	17.7876	25.8361	23.1234	13.2588	2.83776	0.356693	2.71	0	22.4476
C09E8.2	chrII	553093	554785	+	No	-0.362068	0	0	0	No	ARM	514	514	37.6744	10.576	9.74228	1.70149	0.910721	0.246455	0.00327622	0	0	0
C09E8.3	chrII	546703	552025	+	No	-0.413233	109	45	33	No	ARM	718	477	48.4943	119.548	48.2107	55.47	9.60721	2.27379	0.0177097	0	0	0.270333
C09E9.1	chrIV	1275864	1277091	+	No	-0.331925	0	48	0	No	ARM	313	187	193.847	17.5278	14.5345	8.17943	23.1143	42.8847	10.5961	1.72	2.34	15.3765
C09F5.1	chrIII	658705	662731	+	No	-0.401042	0	176	423	No	ARM	720	289	21.0816	79.7689	35.8642	10.425	4.87518	4.79161	0.0996121	0	0	25.0287
C09F5.2	chrIII	647122	654460	+	No	-0.439406	187	193	1191	YES	ARM	3713	367	55.7372	9.09955	8.88416	4.28005	8.36142	16.0493	9.07129	1.56	0	16.3248
C09F5.3	chrIII	662843	666261	-	No	-0.437254	434	0	311	No	ARM	1486	1486	40.9375	1.81401	1.14469	0.38691	0	0.0817722	0	0	0	1.20212
C09F9.1	chrII	14698639	14699256	+	No	-0.290333	0	0	0	No	ARM	90	90	7	0	0	0.880627	3.5937	0.116535	71.1654	0	0	0
C09F9.2	chrII	14705440	14712525	+	No	-0.429223	179	128	708	No	ARM	1088	453	51.2274	75.4351	20.171	20.852	2.42885	0.18628	0.93728	0	0	0.157771
C09F9.3	chrII	14720476	14733383	-	No	-0.427892	600	393	2794	YES	ARM	5364	612	141.97	0	3.03633	5.58866	3.83694	1.55677	3.67966	0	0	13.2588
C09F9.4	chrII	14718286	14719595	+	No	-0.429223	179	35	218	No	ARM	453	453	13.898	0	0	0	0	0	0	0	0	0
C09F9.7	chrII	14713264	14718150	-	No	-0.432681	222	157	447	No	ARM	1030	564	141.97	0	0.278696	0.312082	0	0	0	0	0	0
C09G1.1	chrX	15966040	15972229	-	No	-0.434338	425	0	626	No	ARM	1635	610	35.9799	0	0	0.80095	0.33804	0.521543	0.27723	0	0	0
C09G1.2	chrX	15977690	15982529	-	No	-0.426281	38	0	1580	No	ARM	384	384	46.4604	0.232787	0.670838	0.114077	0.134431	0.0139083	0	0	0	1.95731
C09G1.3	chrX	15986091	15987523	+	No	-0.312927	0	0	331	No	ARM	646	646	50.3544	0	0	0	0	0.197623	0	0	0	1.0522
C09G1.4	chrX	15987900	15996865	-	No	-0.451133	897	0	1299	No	ARM	3108	700	34.7063	4.19757	9.85177	3.83059	1.88012	0.98278	0.0645888	0	0	259.081
C09G1.5	chrX	15959028	15962250	+	No	-0.336248	0	42	261	No	ARM	1674	1674	18.8059	3.41418	20.009	8.79541	6.43065	0.152348	0.0606041	4.53	0	37.7579
C09G12.1	chrIV	3502135	3503909	+	No	-0.383035	0	0	834	No	ARM	449	285	15.8135	0	1.76955	0	0	0	0.0109085	0	0	0
C09G12.10	chrIV	3504440	3506112	+	No	-0.375835	56	37	0	No	ARM	462	164	42.9057	1.83198	0.536748	0.442183	0	0	0	0	0	0
C09G12.11	chrIV	3482891	3484703	+	No	-0.440177	0	0	728	No	ARM	498	277	13.296	0	0.388201	0	0	0	0	0	0	0
C09G12.12	chrIV	3489854	3491516	+	No	-0.612872	767	23	0	No	ARM	953	953	38.17	0	0.58699	0.672888	0	0	0	0	0	0
C09G12.13	chrIV	3485312	3487102	+	No	-0.334042	0	0	204	No	ARM	640	640	16.9615	0	0.388201	0	0	0	0	0	0	0
C09G12.14	chrIV	3482108	3482562	-	No	-0.210964	0	0	75	No	ARM	55	55	4	0	0	0	0	0	0	1.63	0	0
C09G12.15	chrIV	3473715	3477221	-	No	-0.458438	0	96	760	No	ARM	1953	523	32.1778	0	0	0	0	0	0	0	0	0
C09G12.16	chrIV	3480007	3481857	-	No	-0.413626	0	83	0	No	ARM	770	770	29.9245	0.456966	0	0	0	0	0	0	0	0
C09G12.17	chrIV	3495292	3496437	-	No	-0.374032	0	0	204	No	ARM	358	344	11.8636	0	0	0	0	0	0	0	0	0
C09G12.2	chrIV	3493606	3495176	+	No	-0.378505	0	0	258	No	ARM	444	444	48.8182	0	0	0	0	0	0	0	0	0
C09G12.3	chrIV	3491773	3493213	+	No	-0.290634	0	0	367	No	ARM	320	320	31.4094	0	0	0	0	0	0	0	0	0
C09G12.4	chrIV	3487520	3489086	+	No	-0.395905	0	0	0	No	ARM	624	624	11.5	0	0	0	0	0	0	0	0	0
C09G12.5	chrIV	3479331	3479727	+	No	-0.0766327	0	0	0	No	ARM	49	49	3.46939	0	0	0	0	0	0	0	0	0
C09G12.6	chrIV	3477388	3479008	-	No	-0.346349	0	0	64	No	ARM	391	232	56.3878	0	0	0	0	0	0	0	0	5.79073
C09G12.8	chrIV	3506285	3509526	-	No	-0.367854	0	286	308	YES	ARM	937	267	248.599	73.8595	39.4629	34.4523	33.1079	57.464	12.6592	15.68	1.57	31.6013
C09G12.9	chrIV	3510470	3514559	-	No	-0.321114	0	222	3231	No	ARM	834	580	349.966	98.0237	36.0504	37.9531	44.3672	119.544	24.5136	1.06	0	66.6969
C09H10.1	chrII	11092690	11093796	+	No	-0.336498	11	0	49	No	ARM	283	207	22.058	0	0	3.99591	6.45806	0.0554837	18.2718	0	0	0
C09H10.10	chrII	11094986	11096417	-	No	-0.199918	0	0	0	No	ARM	51	49	7.21739	9.6106	13.9836	11.4547	19.7969	66.3436	15.9378	0	0	3.37566
C09H10.2	chrII	11096508	11097148	-	No	-0.232788	0	0	0	YES	ARM	212	212	34.1038	209.836	1387.55	1247.63	1038.25	4663.38	2483.26	873.4	16.78	383.427
C09H10.3	chrII	11097782	11100260	+	No	-0.467328	149	0	288	No	ARM	411	411	14.8273	94.8252	171.877	201.392	155.434	391.208	160.453	31.49	0	61.2706
C09H10.5	chrII	11100913	11102890	-	No	-0.354599	0	0	255	No	ARM	1175	344	52.9396	63.8363	17.6875	12.2258	29.9853	193.939	29.5175	4.85	0	295.781
C09H10.6	chrII	11106557	11108365	+	No	-0.213547	0	0	0	No	ARM	58	53	10.0189	104.756	26.6508	30.4347	56.2682	354.207	69.9627	2.03	0	8.87557
C09H10.7	chrII	11108126	11109525	+	No	-0.337045	0	0	0	YES	ARM	285	44	53.2281	99.4195	29.225	31.956	48.8222	81.5103	16.3603	0	0	31.1818
C09H10.8	chrII	11109525	11111111	-	No	-0.320277	0	0	0	No	ARM	280	47	5.14894	0.853368	5.37837	1.60147	0	0.0276862	0.0167463	1.04	0	9.14913
C09H10.9	chrII	11104403	11105988	+	No	-0.272789	0	0	0	No	ARM	57	57	32.8409	0	1.04501	3.03934	1.33368	0.303832	27.6376	0	0	0
C10E2.1	chrX	16763635	16766583	+	No	-0.379185	50	0	0	No	ARM	1589	1589	19.0022	0.49691	0.923969	0	0	1.16019	0.572223	0	0	0.184976
C10E2.2	chrX	16745665	16748135	+	No	-0.28714	0	0	442	No	ARM	359	50	42.018	1.13144	2.62681	2.35957	0.914941	0.723952	0.097725	0	0	2.03739
C10E2.3	chrX	16729485	16744625	+	No	-0.342496	0	0	1071	No	ARM	561	415	8.26025	31.2179	28.2537	13.4654	8.97393	10.4205	0.591361	4.83	2.53	314.268
C10E2.4	chrX	16749681	16751037	-	No	-0.514139	320	0	0	No	ARM	714	714	17.8571	0	1.54786	0	0	0.874053	0.0491815	0	0	179.438
C10E2.5	chrX	16751790	16753600	-	No	-0.322952	0	0	111	No	ARM	714	603	17.5126	0.864805	2.50765	0	0.998823	0.350093	0.0136816	0	0	174.961
C10E2.6	chrX	16767106	16770427	-	No	-0.337325	50	0	0	YES	ARM	250	237	14.7679	66.4271	51.8125	47.3968	43.4888	53.8713	17.6389	6.53	0	48.5936
C11D9.1	chrI	4422032	4426177	+	No	-0.346364	85	0	597	No	ARM	664	664	48.55	5.87591	10.1735	6.47224	5.21122	1.17276	0.0499607	0	0	2.52259
C11G10.1	chrX	15157287	15158547	-	No	-0.368792	0	0	153	No	ARM	424	424	10.125	2.67275	20.0898	24.6147	15.9595	0.446914	0.0612654	0	0	188.645
C11G6.1	chrX	16332367	16335868	+	No	-0.308363	0	0	475	No	ARM	689	641	24.4412	37.4111	6.01551	3.53202	4.51964	16.9155	0.262032	0	0	79.6448
C11G6.2	chrX	16329144	16329925	+	No	-0.126926	0	0	0	No	ARM	271	271	26.203	0	0	0	2.21833	0	0	0	0	0
C11G6.3	chrX	16340640	16345955	+	No	-0.428513	293	0	306	No	ARM	1575	1186	23.2241	12.0296	5.52553	4.45218	3.84917	17.9512	0.400359	2.55	0	0
C11G6.4	chrX	16355548	16359228	+	YES	-0.554301	346	0	88	No	ARM	771	771	28.6719	14.0092	16.6004	9.19674	11.0692	1.54265	0.30227	1.54	0	56.4808
C11H1.2	chrX	14304862	14307697	-	No	-0.311395	0	0	0	No	ARM	547	205	33.192	24.6434	9.78592	7.30383	3.94302	3.51235	0.158216	0	0	7.45159
C11H1.3	chrX	14307792	14311613	-	No	-0.42614	232	0	0	No	ARM	620	620	31.9565	42.6065	23.2454	13.925	12.4761	7.47408	0.293894	2.97	0	147.157
C11H1.4	chrX	14322938	14326501	+	No	-0.484997	325	55	0	YES	ARM	3697	608	47.6817	5.53649	3.21484	4.85894	2.81295	0.0735848	0.0234789	0	0	0
C11H1.5	chrX	14298020	14303070	-	No	-0.356014	0	0	143	No	ARM	1118	506	29.9907	0.237124	0.846319	10.9171	0.230687	0.0171106	0.00689762	0	0	0
C11H1.7	chrX	14327547	14330125	+	No	-0.338105	0	0	490	No	ARM	1258	1258	37.1073	19.0811	8.64735	4.60769	1.14835	0.154019	0.0397544	0	0	21.6617
C11H1.8	chrX	14295751	14296586	-	No	-0.26573	0	0	0	No	ARM	259	259	9.62548	47.5834	15.3562	7.0343	5.23369	38.1072	0.334873	0	0	46.858
C11H1.9	chrX	14318062	14320328	-	No	-0.412342	0	0	270	No	ARM	230	73	32.2261	30.8752	27.2482	24.2633	9.69195	0.773173	0.47907	0	0	2.41404
C13A10.1	chrII	1350691	1355645	-	No	-0.335418	76	1655	1397	No	ARM	1178	1111	320.598	0.298781	2.88107	3.73856	1.91827	0.254997	0.0530591	2.15	0	4.94911
C13A10.2	chrII	1357183	1358014	-	No	-0.29307	0	0	41	No	ARM	315	315	62.127	1.21084	12.7795	4.85289	3.2803	0.257594	0.0417927	3.18	0	484.555
C13B4.1	chrII	14470296	14479551	-	No	-0.417979	248	323	958	No	ARM	938	613	186.789	8.08797	11.6116	13.0656	19.9492	29.3146	8.34145	0	0	2.29949
C13B4.2	chrII	14485548	14488615	-	No	-0.348302	0	93	58	No	ARM	955	955	48.4533	150.001	51.6439	91.5791	119.658	388.172	131.768	3.52	0	12.9802
C13B7.1	chrV	2435723	2437783	+	No	-0.342508	0	194	191	No	ARM	612	612	27.7892	0	0	0	0	0	0	0	0	0
C13B7.2	chrV	2431803	2434724	+	No	-0.39875	0	437	0	No	ARM	1046	1046	32.0769	0	0	0	0	0	0	0	0	0
C13B7.3	chrV	2419079	2421582	+	No	-0.871351	732	0	952	No	ARM	518	518	20.6978	0	0	0	0	0	0	0	0	0
C13B7.4	chrV	2423285	2426205	-	No	-0.410742	0	219	857	No	ARM	660	462	18.6122	0	0	0	0	0	0	0	0	0
C13B7.5	chrV	2426477	2428123	-	No	-0.453042	0	0	0	No	ARM	220	214	48.15	0	0	0	0	0	0	0	0	0
C13B7.6	chrV	2421865	2422894	+	No	-0.373966	0	0	285	No	ARM	295	295	48.0426	1.07353	0	3.83723	5.06141	0	0	0	0	0
C14A11.1	chrX	2820439	2822019	+	No	-0.323482	0	0	407	No	ARM	664	664	40.1536	5.56957	18.8928	2.75717	2.8551	0.0235551	0.0222317	0	3.17	0
C14A11.2	chrX	2803103	2804822	+	No	-0.336624	0	0	0	No	ARM	601	601	10	14.6911	6.50636	0.429901	0	0.0132004	0.00388978	0	0	447.195
C14A11.3	chrX	2793927	2799235	+	No	-0.360947	175	0	944	No	ARM	6480	438	37.2228	23.163	13.8172	8.7424	9.17735	17.097	0.349457	1.12	5.2	114.236
C14A11.5	chrX	2805066	2807520	-	No	-0.305363	0	0	697	No	ARM	593	593	21.1726	3.21576	1.81691	0.275272	0.324387	0.0199751	0.00268143	0	0	9.57294
C14A11.6	chrX	2810475	2814117	-	No	-0.351533	128	0	1025	No	ARM	765	45	82	0.567845	2.4087	2.95691	1.86434	0.0745976	0.0408735	0	0	0.159062
C14A11.7	chrX	2823281	2826819	-	No	-0.452824	0	75	401	No	ARM	963	68	30.1304	4.07559	9.48837	2.86585	1.48522	0.0913564	0	0	0	11.1969
C14A11.9	chrX	2807900	2809623	-	No	-0.420578	0	0	0	No	ARM	464	270	47.0909	20.9971	27.2173	15.9564	13.2463	15.8489	1.01833	2.74	0	153.426
C14A6.1	chrV	18157998	18159582	+	No	-0.347885	0	0	20	No	ARM	468	468	14.6496	0	11.4957	22.8754	22.5825	1.78343	0.989887	279.77	1.08	0
C14A6.12	chrV	18162005	18162640	-	No	-0.2804	0	0	56	No	ARM	100	100	14.93	0	0	0	0	0	0.0123348	0	0	0
C14A6.13	chrV	18159624	18161311	-	No	-0.346297	0	0	0	No	ARM	294	172	78.7143	0	0	8.399	16.1384	0.0484925	31.5872	0	0	0
C14A6.2	chrV	18148782	18154368	+	No	-0.464171	348	1133	2782	No	ARM	2192	922	64.3177	0.492353	0	0.329286	0	0.0467207	2.24186	0	0	0
C14A6.3	chrV	18146370	18148721	+	No	-0.289106	0	0	658	No	ARM	602	602	14.7826	0.409971	0	1.8381	1.38281	0.00548656	2.82588	0	0	0
C14A6.5	chrV	18163463	18164800	-	No	-0.409222	0	215	0	No	ARM	387	387	97	0	0	0	0	0.0402603	4.42714	0	0	0
C14A6.6	chrV	18165265	18167203	-	No	-0.384186	0	0	290	No	ARM	656	656	28.9878	0	0	4.82999	6.47679	0.0296359	22.7229	0	0	0
C14A6.7	chrV	18167605	18168422	-	No	-0.283702	0	214	243	No	ARM	324	47	67	0	0	1.17834	1.17834	0	1.85539	0	0	0
C14A6.8	chrV	18169058	18171590	-	No	-0.218824	0	1935	951	No	ARM	2142	2142	732.331	0	0	0	0	0.104645	17.2782	0	0	0
C14B1.1	chrIII	3699700	3701458	-	No	-0.20396	0	0	245	No	ARM	50	50	31.3478	237.119	140.728	212.634	158.636	487.337	383.69	24.56	1.33	87.4547
C14B1.10	chrIII	3709311	3713334	+	No	-0.439922	135	0	59	YES	ARM	539	539	100.798	17.1116	16.2172	18.9486	23.4232	80.8523	20.6514	1.18	0	16.0594
C14B1.12	chrIII	3724202	3724962	-	No	-0.572514	92	0	47	No	ARM	212	212	2.28302	24.3416	6.33551	20.3314	55.0106	170.008	46.2746	0	0	2.15745
C14B1.2	chrIII	3702263	3703154	+	No	-0.31763	0	0	368	No	ARM	54	54	12.9592	21.1006	2.64155	18.0623	49.7752	291.504	22.751	2.81	2.7	4.13298
C14B1.3	chrIII	3703629	3705036	+	No	-0.240958	0	0	289	No	ARM	51	48	48.6667	8.12674	13.7396	12.4094	11.5836	12.7732	34.3463	8.18	0	43.9931
C14B1.4	chrIII	3705246	3706767	+	No	-0.211206	0	8	298	No	ARM	63	63	28.7843	92.4794	23.6433	22.5632	33.5811	196.478	24.5273	2.26	2.45	60.1496
C14B1.5	chrIII	3706865	3709204	+	No	-0.386413	217	0	892	No	ARM	639	639	127.608	29.697	15.8761	28.0279	30.1263	90.8325	22.2195	5.23	0	54.2926
C14B1.6	chrIII	3713442	3718729	+	No	-0.448832	126	48	603	No	ARM	612	612	96.541	10.1807	8.85964	11.3501	20.6662	46.8443	15.2354	1.08	0	7.02793
C14B1.7	chrIII	3719885	3723579	-	No	-0.406533	0	0	901	No	ARM	90	90	16.8889	0.316801	0.592318	4.38783	13.7491	92.2031	30.3728	0	0	1.46538
C14B1.8	chrIII	3718715	3719655	-	No	-0.262326	0	0	0	No	ARM	52	46	10.8261	48.2449	31.6578	37.7619	37.2495	55.8096	15.1423	1.61	0	2.62403
C14B1.9	chrIII	3725055	3726484	-	No	-0.265509	0	0	0	No	ARM	56	53	19.2679	8.63584	1.2516	26.6673	60.0107	290.45	17.0937	1.97	0	4.9622
C14B4.2	chrV	19332695	19349458	-	No	-0.445158	1429	5464	3721	No	ARM	1822	1220	122.978	8.34786	16.2751	9.07143	7.30716	0.686302	0.380247	0	0	4.86218
C14C6.1	chrV	560195	562957	+	No	-0.343974	0	40	496	No	ARM	942	918	29.5817	0.529626	0	0	0	0	0.0145612	0	0	0
C14C6.10	chrV	564391	566085	-	No	-0.293234	0	0	238	No	ARM	526	526	33.2857	0	0	0	0	0	0	0	0	0
C14C6.11	chrV	566719	568206	-	No	-0.427091	78	51	190	No	ARM	317	317	37.8966	0	0	0	0	0	0	0	0	0
C14C6.12	chrV	570571	571178	-	No	-0.219085	0	0	0	No	ARM	47	47	27.0444	0	2.52426	0	0	0	0.00937064	0	0	0
C14C6.13	chrV	572031	574740	-	No	-0.699899	808	0	603	No	ARM	1579	1579	33.0177	0	0	0	0	0	0.0127993	0	0	0
C14C6.2	chrV	563135	564383	+	No	-0.341342	0	40	282	No	ARM	506	506	22.3577	0	23.2301	28.1313	19.5468	0.404092	0.858427	71.54	0	1.13259
C14C6.3	chrV	543469	545360	+	No	-0.502324	0	232	475	No	ARM	339	170	32.6106	0	0	0	0	0	0	0	0	0
C14C6.4	chrV	539202	541487	+	No	-0.350434	0	0	0	No	ARM	317	189	40.8612	0	0	0	0	0.0158578	0.0197261	0	0	0
C14C6.5	chrV	536628	537419	+	No	-0.335315	0	0	0	No	ARM	178	178	13.7865	7.27333	102.731	62.9669	30.5036	5.06345	4.52186	565.65	3.5	6.93777
C14C6.6	chrV	545844	548081	-	No	-0.292061	0	0	0	No	ARM	266	66	25.75	0	0	0	0	0	0	0	0	0
C14C6.7	chrV	548702	550654	-	No	-0.325286	0	0	0	No	ARM	52	49	46.2857	0	0	0	0	0	0	0	0	0
C14C6.8	chrV	551279	552979	-	No	-0.331174	0	0	0	No	ARM	69	46	28.4783	0	0	0	0	0.010382	0.0213426	0	0	0
C14C6.9	chrV	554374	556156	-	No	-0.406687	0	0	303	No	ARM	517	517	34.3656	0	0	0	0	0.0239278	0.0050334	0	0	0
C14E2.1	chrX	1826459	1827348	+	No	-0.330503	0	0	266	No	ARM	342	342	17.8216	1.06057	0	0	0	0	0	0	0	0
C14E2.2	chrX	1806748	1809537	-	No	-0.33821	0	47	503	No	ARM	1510	1510	26.2712	0	0	0	0	0.0297508	0	0	0	0
C14E2.3	chrX	1810679	1811530	-	No	-0.36995	0	0	0	No	ARM	120	120	15.2653	0	0	0	0	0	0	0	0	0
C14E2.4	chrX	1818858	1821318	-	No	-0.325348	0	43	1036	No	ARM	544	267	76.9504	0	0	0.444561	0.972342	0	0.0261483	0	0	0
C14E2.5	chrX	1823609	1825334	-	No	-0.371276	0	0	245	No	ARM	659	659	25.8509	0	0	0	0	0	0.0066018	0	0	0
C14E2.6	chrX	1827731	1828481	-	No	-0.398333	0	0	0	No	ARM	165	165	12.6848	0	0	1.94185	0	0.0194151	0.307123	0	0	0
C15C6.1	chrI	12202220	12203708	+	No	-0.532616	0	0	0	No	ARM	315	315	5.48583	80.5811	26.9259	13.5901	9.32953	1.2091	0.0523967	0	0	0
C15C6.2	chrI	12203790	12205800	+	No	-0.458059	0	0	0	No	ARM	563	391	20.4092	0.42465	0	14.0493	36.1578	1.23912	299.385	0	0	0
C15C6.3	chrI	12207085	12212197	+	No	-0.347768	138	311	0	No	ARM	878	643	490.633	35.1103	12.6725	10.9505	13.8548	57.5339	12.0149	0	0	112.182
C15C6.4	chrI	12213099	12215175	+	No	-0.52723	262	400	0	No	ARM	755	265	186.35	5.24498	7.62171	10.7147	14.77	47.0264	9.32058	0	0	19.2254
C16A11.1	chrII	4247191	4255284	+	No	-0.375388	0	414	445	No	ARM	2981	307	77.9385	0.396192	1.88951	0.792963	0.263015	0.0385029	0.0431229	0	0	0.349996
C16A11.10	chrII	4231385	4234623	+	No	-0.555403	612	0	1002	No	ARM	584	320	63.7631	1.28647	1.04448	3.37468	10.0544	7.05123	3.54571	0	0	0
C16A11.2	chrII	4238175	4244835	+	YES	-0.476798	1470	91	1551	No	ARM	1339	1339	607.886	14.9318	9.3338	7.56141	16.585	50.2336	9.03345	1.28	0	6.67844
C16A11.3	chrII	4229588	4230812	+	No	-0.134851	0	0	0	No	ARM	52	47	71.3617	0.983494	1.42292	2.955	5.3593	73.376	18.1541	0	0	0.482781
C16A11.4	chrII	4227048	4229171	+	No	-0.304957	0	0	0	No	ARM	281	281	36.6797	8.73691	7.40256	26.5689	39.6061	152.91	36.1974	0	0	2.38163
C16A11.5	chrII	4223316	4226333	+	No	-0.375968	0	43	159	No	ARM	404	404	53.082	0	0.394607	1.67554	4.09747	14.573	5.22315	0	0	0.263385
C16A11.6	chrII	4236503	4237752	-	No	-0.257628	0	86	0	No	ARM	218	218	81.289	14.6513	2.05784	13.8238	33.3537	180.925	40.9013	0	0	0
C16A11.7	chrII	4255507	4256942	-	No	-0.349614	0	82	271	No	ARM	339	339	87.7347	0	0	2.15468	7.58258	0.29501	70.8127	0	0	0
C16A11.8	chrII	4257094	4258784	-	No	-0.34543	0	62	356	No	ARM	747	747	38.008	0	0	0	0	0.0226561	0.036722	0	0	0
C16A11.9	chrII	4234952	4235985	-	No	-0.320309	0	0	0	No	ARM	94	94	9.07547	2.06837	7.61352	2.3483	5.87266	5.33223	2.46413	0	0	0.650811
C16C10.1	chrIII	4178697	4181414	-	No	-0.373333	0	302	92	No	ARM	608	258	133.595	2.5644	7.35458	11.5636	18.3279	58.9315	11.9294	3.69	0	6.63937
C16C10.10	chrIII	4153574	4154619	+	No	-0.229652	0	0	141	No	ARM	48	46	6.625	50.2643	24.9777	29.5696	35.7852	113.945	29.4011	6.31	0	20.7294
C16C10.11	chrIII	4152025	4152886	+	No	-0.217116	0	0	0	No	ARM	112	112	8.38462	71.7441	133.905	218.048	102.273	489.781	152.617	54.08	6.69	178.385
C16C10.12	chrIII	4147354	4151572	-	No	-0.371247	0	96	298	No	ARM	593	73	32.6515	0.245107	0.443638	0.925441	0.211082	0.231223	8.8219	0	0	0.650095
C16C10.13	chrIII	4176651	4177552	+	No	-0.238659	0	0	159	No	ARM	44	44	12.4091	0.768506	0	1.53054	3.10232	0.443841	11.0468	0	0	0
C16C10.2	chrIII	4177505	4178642	-	No	-0.25602	0	81	0	YES	ARM	104	50	24.72	21.7442	25.3319	31.5453	38.4778	109.199	30.0181	2.93	1.93	16.4965
C16C10.3	chrIII	4172307	4176135	-	No	-0.271245	0	0	113	No	ARM	51	49	10.2353	26.5469	16.339	54.419	141.362	509.838	99.6039	0	0	5.58591
C16C10.4	chrIII	4171238	4172154	+	No	-0.255352	0	0	46	No	ARM	125	125	18.304	182.826	36.476	57.2723	74.9669	226.168	70.6582	3.49	0	34.4
C16C10.5	chrIII	4168770	4171135	-	No	-0.3211	0	40	176	No	ARM	509	50	41.8998	19.7335	16.9355	21.7496	22.3904	38.7352	12.9411	6	0	38.4016
C16C10.6	chrIII	4166674	4168741	-	No	-0.322636	0	0	418	YES	ARM	349	236	87.6103	50.9664	23.3289	23.4646	29.3231	147.662	43.1458	12.67	1.08	5.48188
C16C10.7	chrIII	4164245	4166821	-	No	-0.285172	0	154	79	No	ARM	601	425	196.673	68.7832	30.9682	39.1918	41.9846	98.1576	17.9812	9.57	2.75	34.9696
C16C10.8	chrIII	4161921	4164147	-	No	-0.30359	0	45	0	No	ARM	524	524	157.304	57.6987	66.3543	93.699	92.9213	91.0529	38.6148	3.98	2.26	17.7029
C16C10.9	chrIII	4155361	4157368	-	No	-0.364649	0	0	182	No	ARM	666	666	52.0345	0	0.868942	0	0	0.0767001	0.0221111	0	0	0
C16C4.1	chrII	1894342	1894687	+	No	-0.254768	0	0	0	No	ARM	168	168	16.4345	0	0	0	0	0	0	0	0	0
C16C4.10	chrII	1881615	1882810	-	No	-0.23568	0	40	0	No	ARM	253	253	31.1186	0	0.429353	0	0	0	0	0	0	0
C16C4.11	chrII	1883600	1884740	-	No	-0.296396	0	0	0	No	ARM	209	48	21.2105	0	0	0.678602	0	0	0.00611347	0	0	0
C16C4.12	chrII	1885443	1886484	-	No	-0.258656	0	0	0	No	ARM	122	122	31.4262	0	0.614821	0	0	0.0280786	0	0	0	0
C16C4.13	chrII	1887213	1889176	-	No	-0.349485	0	0	401	No	ARM	165	165	29.037	0	0	0.381714	0	0.026489	0.0127391	0	0	0
C16C4.14	chrII	1889913	1890787	-	No	-0.246074	0	0	0	No	ARM	54	54	14.2222	0	0	0	0.636201	0.134665	0.0817378	0	0	0
C16C4.15	chrII	1871552	1873266	+	No	-0.317854	0	0	353	No	ARM	574	574	35.4091	0	1.54686	2.32225	1.21398	0.0394552	0.0219257	0	0	0
C16C4.16	chrII	1874280	1875111	+	No	-0.356052	0	0	110	No	ARM	143	134	21.3731	0	0	0	0	0	0	0	0	0
C16C4.18	chrII	1860632	1861085	-	No	-0.296294	0	0	126	No	ARM	197	197	42.1624	0	1.42391	9.90863	1.62022	17.7123	13.5187	0	0	0
C16C4.2	chrII	1890855	1891704	+	No	-0.263417	0	0	0	No	ARM	192	192	31.974	0	0	0	0	0	0.0204141	0	0	0
C16C4.3	chrII	1875962	1877242	+	No	-0.38603	0	0	178	No	ARM	335	335	85.1746	0	0	0	0	0.0308909	0	0	0	0
C16C4.4	chrII	1869414	1870802	+	No	-0.288498	0	0	0	No	ARM	217	217	19.04	0	1.35762	9.75572	9.51515	0.245767	0.20814	8.63	0	0
C16C4.5	chrII	1866390	1867899	+	No	-0.273628	0	0	87	No	ARM	403	403	10.0417	1.71749	6.47878	7.48185	2.13445	0.0297017	0.0255868	1.55	0	0
C16C4.6	chrII	1862638	1863787	+	No	-0.154458	0	0	0	No	ARM	48	48	9.25	2.86131	0	0	0.447248	0.100945	0.010799	0	0	0
C16C4.8	chrII	1877583	1878764	-	No	-0.217655	0	0	0	No	ARM	200	58	28.225	0	0.41899	0	0	0	0	0	0	0
C16C4.9	chrII	1879703	1880713	-	No	-0.303427	0	0	0	No	ARM	248	248	16.1976	0	0	0	0	0	0	0	0	0
C16C8.10	chrII	3464153	3464683	-	No	-0.11114	0	0	0	No	ARM	43	43	6.04651	0	0	0	0	0	0	0	0	0
C16C8.11	chrII	3453766	3454683	+	No	-0.131135	0	0	0	No	ARM	52	52	35.28	8.04597	1.51689	4.0752	6.76323	44.1572	14.4528	0	0	0
C16C8.12	chrII	3452644	3453631	+	No	-0.149188	0	0	0	No	ARM	48	48	15.4894	0.487814	0	0	2.19312	44.4498	4.40498	1.39	0	0
C16C8.13	chrII	3451423	3452504	+	No	-0.310578	0	0	0	No	ARM	83	83	48.5231	0	0	4.16128	5.72518	14.2509	2.85614	0	0	0
C16C8.14	chrII	3449255	3451062	+	No	-0.332067	0	0	0	No	ARM	4263	4263	115.624	7.01797	3.38635	10.468	12.4259	20.5327	4.8185	0	0	0
C16C8.16	chrII	3445767	3446740	+	No	-0.163109	0	0	0	No	ARM	46	46	17.5217	11.7178	5.37345	27.6731	45.1023	195.005	36.2261	0	0	0
C16C8.17	chrII	3440829	3442448	+	No	-0.391604	0	0	149	No	ARM	412	53	11.6893	0	0	0	0	0	0.0647761	0	0	0
C16C8.18	chrII	3429408	3431309	+	No	-0.367691	0	0	40	No	ARM	661	265	26.5613	0	0	2.0455	5.01013	0.434499	128.516	0	0	0
C16C8.19	chrII	3458503	3459059	+	No	-0.2715	0	0	0	No	ARM	50	50	10.72	0	0	0	0	0	0	0	0	0
C16C8.2	chrII	3431284	3436515	-	No	-0.465738	88	233	712	No	ARM	1446	344	34.5263	21.2865	14.0217	8.12149	1.57707	0.0940394	0.0534405	0	0	0.543451
C16C8.20	chrII	3446959	3448023	+	No	-0.304503	0	0	197	No	ARM	579	579	22.8511	0	0	2.24376	3.19547	25.7118	5.27153	0	0	0
C16C8.21	chrII	3448208	3448762	+	No	-0.080875	0	0	0	No	ARM	48	48	23.6667	0	0.720397	0.819714	1.79288	7.53402	1.97214	0	0	0
C16C8.22	chrII	3442492	3443257	-	No	-0.33363	0	93	87	No	ARM	235	235	20.6043	0	0	1.72464	4.38131	0.535724	18.7381	0	0	0
C16C8.4	chrII	3443281	3444385	-	No	-0.241741	0	0	0	YES	ARM	186	54	74.7037	4.68262	1.06571	9.7041	18.7566	95.6492	24.8431	1.52	0	0
C16C8.5	chrII	3444730	3445367	-	No	-0.28112	0	0	0	No	ARM	50	50	41.92	7.58141	0.93412	11.2811	15.9888	99.836	12.577	0	1.39	0
C16C8.7	chrII	3459621	3460317	-	No	-0.255689	0	0	0	No	ARM	61	61	16.0426	0	0	0	0	0	0	0	0	0
C16C8.8	chrII	3461114	3461684	-	No	-0.264614	0	0	0	No	ARM	57	57	9.22807	0	0	0	0	0	0	0	0	0
C16C8.9	chrII	3462569	3463208	-	No	-0.230426	0	0	0	No	ARM	57	54	26.8596	0	0	0	0	0.0217442	0	0	0	0
C16H3.1	chrX	17617750	17619382	+	No	-0.3226	0	0	0	No	ARM	429	145	30.2276	1.42765	7.05395	1.9662	0.652162	0.55708	0	0	0	4.13353
C16H3.2	chrX	17600395	17601428	+	No	-0.342263	0	0	0	No	ARM	372	372	23.3103	69.0328	162.03	154.101	102.077	9.65739	9.14802	93.04	0	45.0569
C16H3.3	chrX	17601532	17609972	-	No	-0.345947	0	205	449	No	ARM	5021	5021	29.5267	15.5012	12.7739	4.12069	4.47597	2.23849	0.239021	2.8	2.94	33.3444
C17A2.1	chrII	3852991	3854617	+	No	-0.375092	0	0	0	No	ARM	177	152	36.8	0	0	0	0	0	0.00447391	0	0	0
C17A2.2	chrII	3846329	3848145	+	No	-0.229479	0	113	75	No	ARM	146	146	39.6279	0	0	0	0	0	0	0	0	0
C17A2.3	chrII	3843610	3845511	+	No	-0.370611	0	0	208	No	ARM	711	54	22.8261	0	0	0	0	0	0	0	0	0
C17A2.4	chrII	3839863	3841274	+	No	-0.329803	0	0	49	No	ARM	143	127	12.7273	0	0	0	0	0	0	0	0	0
C17A2.5	chrII	3833251	3836017	-	No	-0.308182	0	0	61	No	ARM	203	203	39.8966	0	0	0	0	0	0.00264179	0	0	0
C17A2.6	chrII	3837339	3838950	-	No	-0.363483	0	0	111	No	ARM	204	118	43.2794	0	0	0	0	0	0	0	0	0
C17A2.7	chrII	3841915	3843407	-	No	-0.294117	0	0	0	No	ARM	240	240	35.0769	0	0	0	0	0	0	0	0	0
C17A2.8	chrII	3849054	3850727	-	No	-0.313833	0	0	59	No	ARM	72	72	23.44	0.497449	0	0	0	0	0	0	0	0
C17B7.1	chrV	3351562	3352770	+	No	-0.459143	0	0	0	No	ARM	148	49	12.4324	0	0	0	0	0	0	0	0	0
C17B7.10	chrV	3340175	3342742	-	No	-0.450781	0	0	63	No	ARM	283	105	25.1532	0	0.211808	0	0	0	0	0	0	0
C17B7.11	chrV	3345306	3346481	-	No	-0.257696	0	0	0	No	ARM	46	46	10.5652	10.3628	16.6542	9.5655	8.75659	11.341	1.5537	4.72	0	1.09277
C17B7.12	chrV	3353259	3353918	+	No	-0.266676	0	0	0	No	ARM	102	102	21.7451	0	0	0	0	0.0716028	0.053722	0	0	0
C17B7.14	chrV	3320293	3320612	-	No	-0.205259	0	0	0	No	ARM	58	58	6.87931	0	0	0	0	0	0	0	0	0
C17B7.2	chrV	3348626	3350964	+	No	-0.324185	0	0	207	No	ARM	960	960	28.5238	0	0.683263	0	0	0.0137944	0.0032698	0	0	0
C17B7.3	chrV	3342800	3343862	+	No	-0.31023	0	0	0	No	ARM	269	269	10.4839	0	0	0	0	0.0217875	0.011123	0	0	0
C17B7.4	chrV	3339344	3340089	+	No	-0.225814	0	0	0	No	ARM	53	43	12.2642	0	0	0	0	0.0129532	0.0217547	0	0	0
C17B7.5	chrV	3333631	3339012	+	No	-0.409065	0	0	374	No	ARM	559	46	38.9545	0	0.633136	0.216048	0.243031	0	0	0	0	0
C17B7.8	chrV	3320744	3324276	-	No	-0.493074	436	0	671	No	ARM	1207	1207	55.4146	0	0.323075	0.528376	0.528376	0.00564014	0.00524373	0	0	0
C17B7.9	chrV	3330911	3332110	-	No	-0.312531	70	0	359	No	ARM	550	550	28	0	0	0.687853	0.687853	0	0	0	0	0
C17D12.1	chrI	11611662	11616130	+	No	-0.452159	788	380	536	No	ARM	876	863	189.622	19.3917	14.2282	20.6817	13.3911	45.1922	17.2222	6.41	0	99.0094
C17D12.2	chrI	11592292	11601596	+	No	-0.502172	1816	593	823	YES	ARM	2642	361	77.418	50.0362	37.3954	5.74334	2.87015	0	0.0104981	0	0	828.869
C17D12.3	chrI	11616806	11620254	-	No	-0.401764	2191	0	475	No	ARM	826	826	18.7313	0	0	0	0	0	0	0	0	0
C17D12.5	chrI	11586226	11587322	+	No	-0.451407	0	0	0	No	ARM	349	349	27.7876	0	0	1.20337	1.35366	0.237775	28.7795	0	0	0
C17D12.6	chrI	11582733	11586060	-	No	-0.379745	170	0	192	No	ARM	244	47	133	0.237962	0.790904	2.13261	1.37868	0.0934749	6.39248	0	0	0
C17D12.7	chrI	11604594	11611292	-	YES	-0.653266	919	158	510	No	ARM	1907	1166	520	106.111	9.04186	12.5914	30.0838	41.1629	23.4025	0	0	1.19269
C17D12.9	chrI	11621566	11621890	-	No	-0.278708	0	0	0	No	ARM	48	48	7.29167	0	2.64146	0	0	0	0	0	0	0
C17E7.1	chrV	3906125	3906932	+	No	-0.276953	0	37	112	No	ARM	56	43	66.1786	2.20933	10.8818	9.37114	8.87623	0.405842	0.246555	2.78	0	3.06074
C17E7.10	chrV	3898784	3900187	-	No	-0.319695	0	0	36	No	ARM	177	177	16.6383	0	0	0	0	0	0	0	0	0
C17E7.11	chrV	3900481	3902543	-	No	-0.293025	0	0	77	No	ARM	304	119	49.4	0	0.460697	0	0	0	0	0	0	0
C17E7.12	chrV	3890949	3892011	-	No	-0.453973	64	0	306	No	ARM	668	668	8.44012	116.272	0	24.2128	81.8068	71.3402	0.0872813	0	0	0
C17E7.13	chrV	3887734	3889238	-	No	-0.286334	0	45	129	No	ARM	509	509	59.1139	6.66858	0.42634	1.81736	0	0.0527689	0.00943066	0	0	0
C17E7.2	chrV	3903091	3904530	+	No	-0.290654	0	0	271	No	ARM	382	382	34.212	0	0.363793	0	0	0	0	0	0	0
C17E7.3	chrV	3894945	3898193	+	No	-0.77951	630	64	93	No	ARM	694	694	253.986	0	0	0	0	0.395352	0.0351615	0	0	0
C17E7.4	chrV	3892840	3894561	+	No	-0.333834	0	0	86	No	ARM	446	446	7.42222	54.5187	0	0.703009	12.8394	110.912	0.106246	0	0	0.533915
C17E7.5	chrV	3866540	3868990	-	No	-0.310109	0	128	102	No	ARM	597	571	53.4081	0	6.06102	1.13859	0	0.110089	0.00608943	0	0	1.25769
C17E7.6	chrV	3871158	3873201	-	No	-0.27891	0	0	39	No	ARM	666	666	39.2252	0	2.34501	0.337804	0.516515	0.678629	0.00274989	0	0	1.81537
C17E7.7	chrV	3875229	3877343	-	No	-0.342026	0	0	266	No	ARM	505	76	27.4158	0	0.288387	0	0	0	0	0	0	0
C17E7.8	chrV	3881988	3886189	-	No	-0.348835	0	80	319	No	ARM	2376	2376	44.6923	0.40466	0	0	0.413814	0.00982002	0	0	0	0
C17E7.9	chrV	3889217	3890846	-	No	-0.442872	0	0	145	No	ARM	556	415	23.9615	19.5096	0.361628	1.23445	4.31087	42.2226	0.0778744	0	0	0
C17F4.1	chrII	3250316	3250860	+	No	-0.432182	0	0	0	No	ARM	55	55	21.4182	0	0	0	0	0	0	0	0	0
C17F4.10	chrII	3235958	3237141	-	No	-0.279467	0	0	0	No	ARM	61	45	28.2182	0	0	0	0	0	0	0	0	0
C17F4.11	chrII	3237473	3238184	+	No	-0.371495	0	70	95	No	ARM	101	101	18	0.853963	2.30495	0	0	0	0	0	0	0
C17F4.12	chrII	3243676	3244166	-	No	-0.245105	0	0	0	No	ARM	57	57	29.625	52.0528	1.31747	4.42589	0	0	0	0	0	0
C17F4.2	chrII	3248694	3249390	+	No	-0.311577	0	43	71	No	ARM	208	208	67.6364	9.94386	6.54908	6.01907	0	0.109449	0	0	0	1.25831
C17F4.3	chrII	3240547	3241730	+	No	-0.359758	0	0	0	No	ARM	172	66	32.375	31.546	3.39143	5.96368	0	0	0	0	0	0
C17F4.4	chrII	3228887	3230525	-	No	-0.322564	0	0	166	No	ARM	454	227	40.6233	0	0	0	0	0	0	0	0	0
C17F4.5	chrII	3246318	3248122	-	No	-0.415003	0	494	0	No	ARM	618	618	48.716	7.81023	0.717435	3.75362	14.0878	142.557	1.45895	0	0	0
C17F4.6	chrII	3250988	3259358	-	No	-0.453283	80	911	744	No	ARM	943	46	91.7774	1.03496	2.19708	0.153469	0	0.420335	0.0221545	0	0	21.4666
C17F4.7	chrII	3245090	3246019	-	No	-0.256535	0	0	30	No	ARM	256	256	5.125	3.49612	9.13942	10.6243	39.4173	111.485	84.6995	3.9	0	28.8866
C17F4.8	chrII	3230879	3234816	-	No	-0.467841	797	0	1523	No	ARM	3224	3224	61.0455	11.1506	0	0	3.39133	1.06262	0	0	0	0
C17F4.9	chrII	3238171	3240046	-	No	-0.307836	0	40	39	No	ARM	744	55	39.7556	0	0.905242	0	0	0	0	0	0	0
C17H1.1	chrI	13117617	13120313	-	No	-0.578313	675	71	152	No	ARM	1133	1133	16.3111	0	0	0	0	0	0	0	0	0
C17H1.10	chrI	13133626	13136145	+	No	-0.379245	118	0	192	No	ARM	523	523	40.3834	0	0	0	0	0	0	0	0	0
C17H1.11	chrI	13107152	13107411	+	No	-0.237366	0	0	0	No	ARM	41	41	1.46341	0	0	0	0	0	0	0	0	0
C17H1.12	chrI	13127140	13127865	+	No	-0.341179	0	0	134	No	ARM	290	290	6.73793	0	0	0	0	0	0	0	0	0
C17H1.13	chrI	13124069	13125673	-	No	-0.338834	0	276	0	No	ARM	585	585	5.3812	0	0	0	0	0	0	0	0	0
C17H1.14	chrI	13107480	13109767	-	No	-0.285247	0	0	0	No	ARM	723	150	32.8507	0	0	0	0	0	0.0136193	0	0	0
C17H1.2	chrI	13085093	13103108	-	No	-0.32679	0	1839	651	No	ARM	2723	2723	19.4704	0	0.552305	0	0	0	0	0	0	0
C17H1.3	chrI	13104241	13106287	+	No	-0.27931	0	0	0	No	ARM	375	42	25.3389	0	0.313162	0	0	0.0447208	0	0	0	0
C17H1.4	chrI	13110383	13112432	-	No	-0.362494	0	0	0	No	ARM	624	624	30.0401	0	0	0	0.842464	0	0.0326664	0	0	0
C17H1.5	chrI	13113475	13116423	+	No	-0.41682	252	0	550	No	ARM	758	455	92.1956	0	0.722842	0.47097	0	0	0	0	0	0
C17H1.6	chrI	13130796	13132453	-	No	-0.39313	0	0	1292	No	ARM	491	491	9.1609	0	0.661563	0	0	0	0	0	0	0
C17H1.7	chrI	13136383	13138510	-	No	-0.354581	0	0	124	No	ARM	308	308	11.7881	0	1.86537	1.18999	0.751573	0.0654452	0.0775538	4.69	0	0
C17H1.8	chrI	13128458	13130398	-	No	-0.324098	0	364	337	No	ARM	614	614	22.4938	0	0	0	0	0.00799463	0	0	0	0
C17H1.9	chrI	13121080	13123502	+	No	-0.413016	0	0	808	No	ARM	375	375	55.6472	0	0	0	0	0	0	0	0	0.246607
C18B12.1	chrX	15012613	15012856	+	No	-0.136481	0	27	0	No	ARM	54	54	3.14815	0	0	0	0	0	0	0	0	0
C18B12.2	chrX	15026237	15031014	+	No	-0.405967	0	0	409	No	ARM	1456	306	54.4308	8.76612	20.1462	4.69956	2.98292	0.0571658	0.0256457	0	1.26	35.5741
C18B12.3	chrX	15031116	15034471	-	No	-0.325073	0	54	259	No	ARM	739	739	26.1015	0.7504	1.61161	0	0	0.00764281	0	0	0	0.609552
C18B12.4	chrX	15036614	15040532	-	No	-0.354472	0	40	401	YES	ARM	781	781	36.315	71.5025	36.0764	23.6067	22.1691	21.4043	0.655745	4.29	0	186.555
C18B12.5	chrX	15042885	15045065	-	No	-0.329044	0	0	172	No	ARM	662	662	44.4955	2.56086	7.31981	2.64991	7.04064	4.21213	0.16329	0	0	12.2803
C18B12.6	chrX	15003994	15007238	-	No	-0.391002	0	0	131	No	ARM	661	661	34.5574	17.2689	11.4436	10.6427	7.41508	8.77791	0.560574	0	0	6.57449
C18D11.1	chrIII	11816468	11819698	+	No	-0.482414	105	615	589	No	ARM	1061	1061	14.5174	93.4608	81.0743	27.0535	15.0247	1.48374	0.741224	0	0	28.5852
C18D11.10	chrIII	11807683	11808364	+	No	-0.367737	0	0	104	No	ARM	418	418	11.6531	2.37565	0	0	0	0.253316	0.0924262	0	0	0
C18D11.2	chrIII	11819704	11822415	-	No	-0.589695	402	0	782	No	ARM	1052	1052	32.0951	20.6238	8.82233	10.5799	6.18369	1.25515	0.925382	14.99	0	5.21449
C18D11.3	chrIII	11823347	11824426	+	No	-0.336889	0	0	431	No	ARM	90	54	57.2889	40.6824	55.2236	54.6351	63.0127	174.279	37.4682	25.79	4.22	12.1824
C18D11.4	chrIII	11826114	11831375	+	YES	-0.681802	1497	86	1449	YES	ARM	1798	1798	96.1593	58.5709	19.2758	26.7983	32.1482	133.684	38.2451	13.09	0	103.392
C18D11.6	chrIII	11810455	11810948	+	No	-0.39425	0	0	0	No	ARM	128	128	3.92188	1.71177	4.38573	1.55614	0	1.20124	0.0220438	0	0	0
C18D11.7	chrIII	11804446	11806695	-	No	-0.409333	157	166	603	No	ARM	1095	1095	23.2466	0	0	1.20926	1.20926	0.0934272	0.0274765	0	0	0.282173
C18D11.9	chrIII	11809017	11809461	+	No	-0.384159	0	0	211	No	ARM	132	132	3.52273	0	0	0	0	0	0	0	0	0
C18D4.10	chrV	17532794	17535342	+	No	-0.504701	652	0	114	No	ARM	1004	1004	15.7141	0	0	0	0	0.094504	0.016338	0	0	0
C18D4.11	chrV	17539145	17539449	-	No	-0.284776	0	0	0	No	ARM	49	49	13.6939	14.472	15.914	9.35875	1.62657	0.384212	0.38286	0	0	0
C18D4.2	chrV	17521135	17527453	+	No	-0.328135	0	0	120	No	ARM	251	251	14.7171	0.406512	3.35445	0.422783	0	0.0259118	0.0475633	0	0	0.197984
C18D4.3	chrV	17532326	17532760	-	No	-0.277258	0	0	0	No	ARM	62	62	2.58065	0	0	0	0	0.0953725	0	0	0	0
C18D4.4	chrV	17530130	17531484	-	No	-0.327898	0	0	180	No	ARM	645	645	16.8	0	3.45284	2.21562	2.51266	3.2434	0.638014	0	0	0
C18D4.5	chrV	17540568	17542246	+	No	-0.458371	0	0	529	No	ARM	653	653	24.3279	0	0	0	0	0	0	0	0	0
C18D4.6	chrV	17535588	17538347	-	No	-0.321159	0	0	434	No	ARM	1175	1175	39.8224	2.94555	1.93865	1.23903	0.838658	3.0259	6.19275	4.71	0	41.6174
C18D4.7	chrV	17542692	17544082	+	No	-0.312276	0	0	337	No	ARM	268	268	26.1828	0	0	0	0	0	0	0	0	0
C18D4.8	chrV	17544130	17546959	-	No	-0.408576	0	0	152	No	ARM	455	455	21.5417	0	1.16355	1.4333	1.0837	0.0574238	0.0252812	4.06	0	0
C18D4.9	chrV	17528002	17529884	+	No	-0.31091	0	0	78	No	ARM	444	444	25.2545	0	0	0	0	0	0	0	0	0
C18E3.1	chrI	4212743	4214263	+	No	-0.480955	109	0	290	No	ARM	312	312	40.5283	0	0	2.06048	2.27979	1.43706	41.3276	0	0	0
C18E3.2	chrI	4210978	4212669	+	No	-0.252979	0	0	446	YES	ARM	68	47	49.3725	70.3421	12.2754	12.8643	22.5419	138.131	13.6825	6.4	0	37.9561
C18E3.3	chrI	4203459	4208521	+	YES	-0.513208	430	191	0	No	ARM	501	437	73.9706	25.0273	17.2387	9.10244	8.49071	7.80779	0.135604	1.84	0	0.504275
C18E3.4	chrI	4202418	4203042	+	No	-0.250934	0	0	0	No	ARM	76	76	23.6739	3.69965	4.16408	3.09871	0	0	0.0146864	0	0	0
C18E3.5	chrI	4193240	4203307	+	No	-0.495558	309	142	1569	No	ARM	5845	389	102.367	20.3546	3.75747	13.8379	20.9923	38.3053	14.4483	0	0	1.99536
C18E3.6	chrI	4190143	4193130	+	No	-0.371212	161	42	287	No	ARM	841	546	73.2426	10.5161	10.0733	22.9334	41.1151	169.35	73.1273	1.8	2.11	2.58059
C18E3.7	chrI	4185061	4189932	+	No	-0.477432	346	401	237	No	ARM	1319	1319	77.0286	7.92549	8.51523	17.1699	21.1851	28.2511	9.98669	3.33	0	8.03209
C18E3.8	chrI	4208512	4210342	-	No	-0.358196	0	192	0	YES	ARM	341	341	61.6471	20.0237	2.25841	11.9964	26.2307	78.8715	15.4119	0	0	0
C18E3.9	chrI	4214294	4215754	-	No	-0.2854	0	0	0	No	ARM	59	50	25.2917	19.1182	3.80761	15.6377	23.2415	48.9924	9.32501	2.24	0	9.11827
C18G1.1	chrV	4777943	4779893	+	No	-0.352253	0	0	100	No	ARM	1063	221	50.2625	9.84738	21.8632	3.38625	1.59617	0.044283	0.0431991	0	0	7.99886
C18G1.2	chrV	4770656	4773077	+	No	-0.332597	0	258	547	No	ARM	957	645	34.7318	20.2579	10.712	7.07892	5.96967	0.793008	0.225454	13.92	0	9.80328
C18G1.3	chrV	4760959	4764165	+	No	-0.461895	122	221	681	No	ARM	1073	917	80	0	0	0.720502	1.13352	0.104602	2.73244	0	0	0
C18G1.4	chrV	4755970	4758594	+	No	-0.243022	0	0	0	No	ARM	51	46	12.8372	6.91029	3.30822	33.447	64.5439	329.934	100.796	0	0	4.39149
C18G1.5	chrV	4754298	4755459	+	No	-0.214113	0	0	0	YES	ARM	186	186	65.6344	144.744	17.4767	63.5683	140.521	1228.77	237.52	4	1.12	16.5919
C18G1.6	chrV	4750565	4753805	+	No	-0.617279	650	0	894	No	ARM	748	748	35.0617	0.984339	3.09412	3.07984	0.880727	0.0253921	0.127772	0	0	0
C18G1.7	chrV	4745554	4748075	+	No	-0.364998	0	244	463	No	ARM	827	827	40.2	0	1.59804	0	0	0	0	0	0	0
C18G1.8	chrV	4764251	4766587	-	No	-0.594505	371	41	371	No	ARM	469	469	36.7647	0	1.56292	0	0	0	0.00223669	0	0	3.76319
C18G1.9	chrV	4767873	4769681	-	No	-0.450247	145	0	175	No	ARM	551	551	17.1488	0.396973	0	2.31718	5.7502	0.13282	35.0997	0	0	0
C18H7.1	chrIV	615543	620930	+	No	-0.441055	0	565	768	No	ARM	2690	289	38.7632	0	7.35718	0.272699	1.01652	0.0465813	0.00215185	0	0	307.25
C18H7.10	chrIV	583812	585912	-	No	-0.337505	196	0	409	No	ARM	972	972	75.142	0	0	0.537869	0	0.00904253	0.025756	0	0	0
C18H7.11	chrIV	596901	598769	+	No	-0.281375	0	0	0	No	ARM	280	280	21.2607	0	1.12257	0.293032	0.690631	0.0757848	0.132289	0	0	0
C18H7.12	chrIV	586040	587829	-	No	-0.318617	52	0	333	No	ARM	767	767	83.2464	0	1.35575	0	0	0	0	0	0	0
C18H7.13	chrIV	589029	590117	-	No	-0.232089	0	0	0	No	ARM	81	45	62.3827	0	3.48894	1.39376	0.926872	0.0172842	0.130341	0	0	0.732602
C18H7.2	chrIV	606360	614026	+	No	-0.35988	0	102	1148	No	ARM	2622	2622	153.832	7.80263	9.53997	4.05195	2.93278	0.0451028	0.0296436	0	0	4.44715
C18H7.3	chrIV	604443	605876	+	No	-0.2532	0	0	0	No	ARM	50	50	13.96	0	0	0	0	0.0100619	0	0	0	0
C18H7.4	chrIV	593333	595234	+	No	-0.43824	57	0	19	No	ARM	312	312	35.2667	0.359698	0	1.35348	3.20572	0.759646	92.8915	0	0	0
C18H7.5	chrIV	586290	587712	+	No	-0.313212	52	0	333	No	ARM	1092	1092	32.261	0	0	0	0	0	0	0	0	0
C18H7.6	chrIV	590884	592485	-	No	-0.349823	0	0	325	No	ARM	515	237	9.72152	0	1.82033	0	0	0	0.118879	0	0	6.82901
C18H7.7	chrIV	595721	596441	-	No	-0.32769	0	0	0	No	ARM	79	42	33.9574	0	0	3.00562	8.79302	0.132594	80.2981	0	0	0
C18H7.8	chrIV	599448	602676	-	No	-0.401493	0	43	0	No	ARM	678	152	66.2596	0	0	0	0	0.00636704	0.011743	0	0	0
C18H7.9	chrIV	602990	603643	-	No	-0.286532	0	0	0	No	ARM	218	218	15.2936	0	0.837979	0.960605	0	0.0433129	0	0	0	0
C23H3.1	chrII	69659	71279	+	No	-0.271547	0	0	47	YES	ARM	225	225	24.5156	50.8609	5.26302	5.83054	8.17219	36.0973	0.417556	1.35	0	224.287
C23H3.2	chrII	61301	64311	+	No	-0.376503	206	0	107	No	ARM	1392	1392	40.0426	9.37063	77.9893	102.191	98.009	1.82529	0.685836	0	5.08	34.0125
C23H3.3	chrII	57669	60080	+	YES	-0.541341	249	0	454	No	ARM	460	460	59.7288	16.0544	13.4789	13.3477	12.1563	43.4077	12.4647	9.74	0	37.0014
C23H3.4	chrII	51071	57607	+	No	-0.34135	0	47	262	YES	ARM	4200	508	61.7091	60.5589	113.146	111.88	89.7441	78.9897	17.0017	49.32	3.31	12.1872
C23H3.5	chrII	47572	50111	+	No	-0.258681	0	144	505	No	ARM	674	345	70.5304	30.8173	27.1987	33.3772	41.6024	69.9326	18.3152	0	0	4.28354
C23H3.7	chrII	53012	55304	-	No	-0.2648	0	0	0	No	ARM	85	85	6.6383	3.45047	5.39455	3.6991	2.61189	0.182619	0.557946	0	0	1.45432
C23H3.9	chrII	71674	77512	-	No	-0.332884	0	69	596	No	ARM	2054	662	31.4259	15.5855	5.4942	2.7537	1.36125	0.0757411	0.0284201	1.08	0	21.3833
C23H5.1	chrIV	2130997	2133028	+	No	-0.502575	241	0	818	No	ARM	709	499	20.7264	12.5586	11.4227	11.7231	9.01585	0.271446	0.714264	1.83	0	0
C23H5.11	chrIV	2091928	2099890	-	No	-0.566584	1687	2084	1104	No	ARM	2383	1551	81.4545	0.830288	0.688585	0.778715	0	0.0136671	0	0	0	0.949399
C23H5.12	chrIV	2133480	2134708	+	No	-0.37521	0	0	407	No	ARM	368	62	12.5109	0	0	0	0	0.0247169	0.0359803	0	0	0
C23H5.2	chrIV	2122796	2126152	+	No	-0.41619	28	271	986	No	ARM	931	200	33.1625	1.61176	8.61737	2.63311	1.62579	0.0571517	0.0025832	0	0	2.35425
C23H5.3	chrIV	2114625	2115625	+	No	-0.260136	0	0	0	No	ARM	573	44	92.5044	2.37072	5.67034	0	0	0	0.0415681	1.77	0	0
C23H5.7	chrIV	2104055	2111605	-	No	-0.416797	368	141	4589	No	ARM	1147	1147	51.3422	0	0.376766	0	0	0.00395568	0	0	0	0
C23H5.8	chrIV	2111889	2113422	-	No	-0.350254	0	97	583	No	ARM	647	197	57.6344	1.27566	143.167	253.215	185.747	3.28549	2.4082	198.36	1.82	9.77935
C23H5.9	chrIV	2126095	2128852	-	No	-0.387193	91	79	1089	No	ARM	1124	1124	21.0879	0.850062	0.495947	0	0.669959	0	0	0	0	0
C24A1.1	chrIII	725016	726153	+	No	-0.317628	0	0	0	No	ARM	591	591	33.7377	2.90854	100.714	28.5438	34.3493	0.897747	0.370947	15.17	3.79	97.1857
C24A1.2	chrIII	706328	715522	+	No	-0.388777	0	330	1457	No	ARM	4047	4047	43.3893	6.36157	1.43322	1.0301	1.88058	2.30531	0.174996	0	0	1.58499
C24A1.3	chrIII	692503	696451	-	No	-0.341701	0	0	220	No	ARM	261	261	46.7914	5.02614	6.33049	9.01534	4.07669	1.05968	1.08746	2.44	0	5.32939
C24B9.1	chrV	2728533	2730241	+	No	-0.228756	0	0	46	No	ARM	578	45	5.65957	0	0	0	0	0	0	0	0	0
C24B9.10	chrV	2735528	2738272	-	No	-0.31713	0	509	880	No	ARM	906	906	68.6	0	0.52508	0	0	0	0.0143685	0	0	0
C24B9.11	chrV	2738755	2740278	-	No	-0.437444	0	0	210	No	ARM	432	432	26.7273	0	0	0	0	0	0	0	0	0
C24B9.12	chrV	2740441	2744324	-	No	-0.365253	270	532	1373	No	ARM	1871	817	48.8594	0.42171	0	0	0	0.0735701	0	0	0	0
C24B9.13	chrV	2745010	2746945	-	No	-0.423508	0	0	436	No	ARM	524	451	31.9313	0	0.421899	0	0	0	0	0	0	0
C24B9.14	chrV	2732174	2734458	-	No	-0.373975	0	0	443	No	ARM	768	768	53.2143	0	0	0	0.490458	0	0	0	0	0
C24B9.15	chrV	2721287	2722653	-	No	-0.277058	0	0	0	No	ARM	207	207	25.14	0	0	0	0	0	0	0	0	0
C24B9.16	chrV	2748236	2750104	-	No	-0.369729	0	0	546	No	ARM	731	731	50.3625	0	0	0	0	0	0	0	0	0
C24B9.2	chrV	2715271	2716998	+	No	-0.319562	0	208	543	No	ARM	665	665	44.2316	0	0.407742	0	0	0	0	0	0	0
C24B9.3	chrV	2706778	2711817	-	No	-0.552493	95	0	1505	No	ARM	1458	880	48.4338	4.56331	81.8788	62.0563	41.9132	1.94343	0.800023	34.34	0	3.29387
C24B9.4	chrV	2712031	2713630	-	No	-0.625241	0	0	260	No	ARM	489	294	15.0962	0	0	0	0	0	0	0	0	0.58872
C24B9.5	chrV	2717392	2719133	-	No	-0.485552	30	0	223	No	ARM	330	330	12.6848	0	0	0	0	0.00867901	0	0	0	0
C24B9.6	chrV	2719693	2720861	-	No	-0.252141	0	0	0	No	ARM	71	71	17.3333	0	0	0	0	0.00913342	0	0	0	0
C24B9.7	chrV	2722900	2725323	-	No	-0.27187	0	0	310	No	ARM	730	730	63.4902	0	0.384516	0.437527	0.437527	0	0.00452247	0	0	0
C24B9.8	chrV	2725899	2727199	-	No	-0.268447	0	0	0	No	ARM	62	47	70.6667	0	0	0	0	0	0	0	0	0
C24B9.9	chrV	2730507	2731095	-	No	-0.180333	0	0	0	No	ARM	57	57	15.9649	14.5312	25.1057	12.4133	16.4298	0.126161	0.175107	403.57	0	18.6844
C24G7.1	chrI	4109408	4112387	+	No	-0.375973	0	0	712	No	ARM	294	294	23.5833	0	0.798076	0	0	0.0146808	0	0	0	0
C24G7.2	chrI	4103714	4108047	+	No	-0.315295	0	41	356	No	ARM	665	88	69.5273	0	0.255401	0	0	0.0423254	0.00304623	0	0	0
C24G7.4	chrI	4094611	4098331	+	No	-0.331141	0	0	169	No	ARM	429	361	52.2083	0.192831	0.788555	2.25115	4.36418	0.196678	0.115814	0	0	0
C24H11.1	chrIII	11787647	11789357	+	No	-0.229558	555	0	556	No	ARM	257	77	19	0	0	0	0	0	0	0	0	0
C24H11.2	chrIII	11790435	11792145	-	No	-0.229558	555	0	727	No	ARM	257	77	3.47082	0	0	0	0	0	0	0	0	0
C24H11.3	chrIII	11783975	11785952	-	No	-0.413444	0	54	1330	No	ARM	766	766	17.1554	13.9472	0	0	0.468971	0	0.102109	0	0	0
C24H11.4	chrIII	11782011	11783974	+	No	-0.448056	0	0	445	No	ARM	464	71	17.3384	0.642794	0	0	0	0.215903	0.145434	0	0	0
C24H11.5	chrIII	11780132	11780926	+	No	-0.432421	0	37	793	No	ARM	273	273	103.069	19.4337	14.8593	11.9372	6.33286	14.2102	3.84092	0	0	15.1363
C24H11.6	chrIII	11775015	11776578	+	No	-0.298585	0	91	585	No	ARM	1021	1021	331.058	70.1681	25.775	49.0438	52.0096	27.4232	8.12349	0	0	2.09642
C24H11.7	chrIII	11751156	11773583	-	No	-0.468313	987	4301	6389	YES	ARM	1854	1004	647.15	32.7172	27.9928	31.4682	20.2424	41.7893	24.8929	0	0	156.45
C24H11.8	chrIII	11795695	11803140	+	YES	-0.440691	132	1630	2137	No	ARM	1465	612	33.2342	6.55663	14.7429	6.62267	1.53992	0.0420481	0.0797786	0	0	3.74557
C24H11.9	chrIII	11777543	11779344	+	No	-0.383171	534	216	230	No	ARM	1033	1033	567.964	17.3735	15.5829	10.5394	13.5774	35.3347	9.24044	0	0	16.5791
C24H12.1	chrII	441497	446999	+	No	-0.369803	0	0	575	No	ARM	2218	233	59.5639	32.198	1.0629	0.451988	4.26107	0.0363723	0.00393625	0	0	0
C24H12.10	chrII	426484	427019	-	No	-0.305646	0	0	0	No	ARM	76	48	34.125	3.86391	0	1.0167	1.1981	0	0	0	0	0
C24H12.11	chrII	427602	429152	-	No	-0.3586	0	0	0	No	ARM	261	95	49.88	10.51	0.491499	0	1.43145	0.0609008	0.0169545	0	0	0
C24H12.12	chrII	433658	435406	-	No	-0.369004	1212	0	177	No	ARM	1212	1212	20.78	1.28559	0	0	0	0	0	0	0	0
C24H12.2	chrII	436866	438748	+	YES	-0.33444	0	0	0	No	ARM	846	407	16.3587	9.27109	1.12717	0.928585	5.79691	1.65057	0.229784	0	0	1.98044
C24H12.3	chrII	430511	432730	+	YES	-0.390275	1578	0	177	No	ARM	559	539	32.1752	18.0413	0	0	1.50128	0.0397917	0	0	0	0
C24H12.4	chrII	411221	416618	+	No	-0.473985	0	1299	408	No	ARM	1094	672	425.461	38.7301	52.3646	57.1043	58.026	106.274	35.501	2.71	0	55.6231
C24H12.5	chrII	406137	410928	-	No	-0.41836	421	41	216	No	ARM	952	944	221.532	14.0655	2.76617	1.79694	10.5589	60.6188	9.1597	0	0	0.993034
C24H12.6	chrII	417348	418882	-	No	-0.349591	0	0	0	No	ARM	208	208	10.1809	0	0	1.02922	1.64016	0	1.08094	0	0	0
C24H12.7	chrII	420055	421141	-	No	-0.283907	0	0	0	No	ARM	634	634	18.6325	20.7562	0	0	0	0.374979	0	0	0	0
C24H12.8	chrII	422318	423142	-	No	-0.267979	0	0	0	No	ARM	77	48	38.8333	7.09831	0	0	0.789135	0	0	0	0	0
C24H12.9	chrII	423623	424863	-	YES	-0.501878	233	0	0	No	ARM	328	328	8.81098	4.52123	0.630879	0	2.44985	0	0	0	0	0
C25F9.1	chrV	19429410	19431658	-	No	-0.436185	0	0	467	No	ARM	300	232	94.7009	2.53845	13.1675	6.65351	0	0	0.0037149	0	0	13.8716
C25F9.10	chrV	19405696	19406365	+	No	-0.145163	0	0	0	No	ARM	52	49	5.02041	11.5393	23.4705	16.997	11.0871	0.129231	0.164117	17.09	0	0
C25F9.11	chrV	19432415	19433129	-	No	-0.180191	0	0	80	No	ARM	47	47	7.87234	2.0005	21.8407	9.6223	2.43444	1.48571	0.499421	62.78	2.18	0
C25F9.12	chrV	19402158	19402920	-	No	-0.216152	0	308	0	No	ARM	46	46	1.52174	0	2.72354	1.37689	0	0.75801	0.0451998	12.29	0	5.22794
C25F9.13	chrV	19397798	19398953	-	No	-0.331244	0	0	0	No	ARM	267	213	25.1461	0	0	0	0	0	0	0	0	0
C25F9.14	chrV	19436569	19437188	+	YES	-0.153429	0	0	0	No	ARM	54	49	5.83673	24.6034	35.4192	33.2745	13.8121	0.369733	0.226273	11.52	0	0.702362
C25F9.15	chrV	19418092	19418951	+	No	-0.262605	0	0	0	No	ARM	205	205	10.8927	0.703546	0.837008	2.5641	0.812574	0	0.030505	0	0	0
C25F9.16	chrV	19434359	19434655	+	No	-0.268409	0	0	295	No	ARM	44	44	3.63636	1.91125	4.90583	0	4.48948	0	0	0	0	0
C25F9.2	chrV	19421441	19426745	+	No	-0.28188	0	0	252	No	ARM	87	75	40.617	0	11.6358	0.347538	2.99462	0.0127464	0.00322537	0	0	0.0522989
C25F9.4	chrV	19411103	19413852	-	No	-0.330728	0	0	297	No	ARM	447	246	38.1754	0.312554	10.6014	15.317	5.18988	0.055643	0.0672231	1.92	0	0
C25F9.5	chrV	19407690	19410819	-	No	-0.323326	0	0	143	No	ARM	371	371	25.5479	5.02783	12.6047	13.453	7.38962	0.0626379	0.0428818	2.82	0	0.112641
C25F9.6	chrV	19403500	19405297	-	No	-0.311401	0	0	0	No	ARM	1193	1193	14.2305	4.80465	5.14812	1.94066	0	0.892711	0.20887	0	0	0
C25F9.7	chrV	19400112	19400686	-	No	-0.214239	0	0	66	No	ARM	46	46	2.82609	1.71967	5.0738	4.74845	0	0.586647	0.163727	21.13	0	20.2792
C25F9.8	chrV	19395025	19396580	+	No	-0.357317	0	0	0	No	ARM	293	126	42.7611	0	0	0	0.433468	0	0	0	0	0
C25F9.9	chrV	19416603	19417865	+	No	-0.310995	0	40	0	No	ARM	608	608	56.4815	0	13.896	12.1775	3.58587	0.157765	0.0760217	0	0	0
C25G6.1	chrX	1269728	1272556	+	No	-0.348615	0	296	338	No	ARM	1705	275	37.3725	1.67196	2.70387	0	0	0.0398508	0	0	0	1.65303
C25G6.2	chrX	1246011	1247494	+	No	-0.282982	0	121	0	No	ARM	502	220	33.5909	56.2435	46.7538	30.8007	11.2378	2.0175	0.54398	12.51	0	51.6749
C25G6.3	chrX	1233087	1238898	-	No	-0.438001	0	480	513	No	ARM	2451	2451	25.3061	0	1.65854	0.716747	0.365311	0.022317	0.00247858	0	1.74	3.1434
C25G6.4	chrX	1247732	1249833	-	No	-0.350877	0	0	174	No	ARM	811	811	26.96	0.658871	5.356	1.13904	0.567408	0.123835	0.00918173	0	0	44.3725
C25G6.5	chrX	1251019	1256002	-	No	-0.446295	308	56	663	No	ARM	1089	1089	43.3364	9.00868	2.83815	2.29829	0.751573	0.138572	0	0	0	0.240211
C26G2.1	chrX	14654902	14662791	+	No	-0.683321	208	0	639	No	ARM	583	302	36.2443	34.6439	14.1918	6.49931	3.13332	0.535806	0.0895451	0	0	5.30076
C26G2.2	chrX	14664219	14671231	+	No	-0.458161	100	0	837	No	ARM	919	436	49.4527	2.70812	2.09345	5.34834	10.0692	0.289899	0.237727	0	0	0
C26H9A.2	chrIV	12653465	12674858	+	No	-0.361262	67	606	2456	No	ARM	901	282	162.926	15.9459	16.1138	10.8145	7.86888	1.61307	0.996745	0	1.16	53.187
C27C12.1	chrX	14852497	14853685	-	No	-0.270905	0	0	0	No	ARM	49	42	7.14286	7.89118	4.08962	5.5868	8.30035	44.6175	3.332	1.57	2.22	16.3326
C27C12.2	chrX	14845867	14849177	+	No	-0.304029	0	0	100	No	ARM	701	701	32.3866	16.1019	20.7141	5.26634	4.78396	11.8922	0.310592	2.95	4.1	173.348
C27C12.3	chrX	14863539	14865775	-	No	-0.275918	0	0	388	No	ARM	132	49	20.7576	0.241059	0	1.45317	5.41685	34.4823	0.929259	0	0	0
C27C12.4	chrX	14854061	14856452	+	No	-0.281115	0	0	0	No	ARM	490	78	18	26.5401	13.2716	9.83535	8.17785	11.9901	0.960829	1.07	0	24.5615
C27C12.5	chrX	14849246	14852764	+	No	-0.277135	0	0	83	No	ARM	602	384	52.8	2.11714	8.00237	3.36309	1.95684	0.0871792	0.0177274	0	0	0
C27C12.6	chrX	14857228	14861732	-	No	-0.322049	0	90	469	No	ARM	2677	2677	14.5009	10.4224	5.61166	2.76655	0.536405	0.0667888	0.00497039	0	0	0
C27C12.7	chrX	14831754	14838118	+	No	-0.351636	0	179	804	No	ARM	1227	1227	37.62	4.36924	15.2942	23.8164	27.2697	0.361917	0.213462	0	0	3.89639
C27C7.1	chrI	11439276	11440700	+	No	-0.357991	0	0	303	No	ARM	111	111	15.045	4.84323	0.32899	11.1982	18.9592	197.847	38.2396	1.84	0	0
C27C7.2	chrI	11433110	11433412	-	No	-0.197412	0	0	255	No	ARM	51	51	28.1961	0	0	0	0	0	0	0	0	0
C27C7.3	chrI	11429061	11432054	+	No	-0.437541	155	324	538	No	ARM	1087	653	52.9181	0	0.766606	1.19451	1.03558	0.0159688	0.00774959	0	0	0
C27C7.4	chrI	11433660	11435920	-	No	-0.490191	0	286	634	No	ARM	367	251	45.5504	0	0.89408	0.678028	0	0	0	0	0	0
C27C7.5	chrI	11423983	11425960	-	No	-0.634585	92	361	0	No	ARM	874	217	37.0881	0	0.603842	0	0	0	0.00834617	0	0	0
C27C7.7	chrI	11421923	11423591	+	No	-0.521232	86	0	0	No	ARM	263	263	32.8364	2.38532	0	0	0.39019	0.0776605	0.0897636	0	0	0
C27C7.8	chrI	11436771	11437397	+	No	-0.245396	0	0	81	No	ARM	48	48	23.2766	0	0	0	0	0	0	0	0	0
C27D8.1	chrIV	12717859	12719367	+	No	-0.386266	0	0	226	No	ARM	301	301	2.47176	0	1.21042	5.16897	10.1331	0.657424	237.042	0	0	0
C27D8.2	chrIV	12712746	12714732	+	No	-0.320121	0	0	151	No	ARM	92	58	11.1167	0.938091	0.231442	1.94269	4.78173	0.367446	98.1559	0	0	0
C27D8.3	chrIV	12706690	12712291	-	No	-0.474799	38	112	811	No	ARM	644	234	26.0342	11.2416	10.7053	10.9754	6.75663	0.941407	1.39188	3.53	0	5.48722
C27D8.4	chrIV	12704085	12706737	+	No	-0.462144	371	74	445	No	ARM	768	432	71.4699	9.07297	6.28205	16.5821	27.3173	76.3447	14.4738	5.67	1.15	46.121
C27H2.2	chrIV	13952564	13963978	+	No	-0.339126	0	159	808	No	ARM	8994	388	72.1698	23.0189	10.1438	6.8562	5.41783	3.75138	0.197681	0	0	55.7605
C28A5.1	chrIII	4429589	4434371	-	No	-0.257492	0	0	232	No	ARM	124	124	25.7581	4.79705	0.984224	1.71483	4.6581	15.5075	3.09103	0	0	0.0691324
C28A5.2	chrIII	4434721	4439515	-	No	-0.271126	0	0	901	No	ARM	138	103	22.7961	3.92746	1.23158	3.16591	6.78094	10.6887	3.45759	0	0	0
C28A5.3	chrIII	4442052	4444211	+	No	-0.361648	0	0	53	No	ARM	436	71	13.3434	6.16712	22.9157	38.7115	48.0562	0.868179	0.216824	0	0	0
C28A5.4	chrIII	4446605	4449912	-	No	-0.402779	0	0	36	No	ARM	1396	344	30.1379	109.087	16.1134	2.83385	7.49848	3.84445	1.28566	0	0	18.4235
C28A5.6	chrIII	4423685	4429471	-	No	-0.416	0	0	417	No	ARM	843	155	24.4864	0.918887	0.353262	3.03865	5.93557	1.14119	44.5927	0	0	0
C29F9.1	chrIII	132423	134404	+	No	-0.361344	0	251	608	No	ARM	998	998	24.9579	4.34042	8.30011	3.44831	2.36788	1.95478	0.370076	2.24	0	19.2678
C29F9.10	chrIII	106050	107452	-	No	-0.329811	0	772	430	No	ARM	772	772	7.70207	0.7645	2.18885	3.11989	3.89416	0.094222	0.0504912	13.12	0	0
C29F9.11	chrIII	109320	111044	-	No	-0.340363	0	0	668	No	ARM	765	765	13.122	0	0	0	0	0	0	0	0	0
C29F9.12	chrIII	121733	122019	-	No	-0.204128	0	0	0	No	ARM	50	47	31.6	0	0	0	0	0	0	0	0	0
C29F9.13	chrIII	130103	130749	-	No	-0.236774	0	0	0	No	ARM	93	93	31.8696	0	1.56364	0	0	0	0	0	0	0
C29F9.2	chrIII	130945	131973	+	No	-0.415761	0	0	31	No	ARM	134	134	18.9286	8.70739	13.8053	11.8605	6.34969	0.0175399	0.0210096	9.19	0	0
C29F9.3	chrIII	124773	126532	+	No	-0.497813	178	0	0	No	ARM	560	450	37.9333	4.31877	13.6983	15.7712	7.02224	0.192639	0.137678	31.01	1.46	6.85625
C29F9.4	chrIII	120490	124685	+	No	-0.423377	178	202	926	No	ARM	1473	1473	46	7.79197	23.2524	37.3503	25.1959	0.292581	0.250026	18.28	0	0
C29F9.5	chrIII	117705	118766	+	No	-0.365855	0	0	79	No	ARM	283	283	3.02326	0.626063	0	0	0	0	0	0	0	0
C29F9.6	chrIII	114578	116912	+	No	-0.441727	0	0	0	No	ARM	410	410	10.9333	0.418203	0.24399	1.69993	0	0.0690431	0.13968	0	0	0
C29F9.7	chrIII	89449	94808	-	No	-0.340122	98	104	2028	YES	ARM	634	609	110.683	69.924	40.9629	25.9074	22.8311	8.04029	1.65327	1.31	0	52.9333
C29F9.8	chrIII	95392	97725	-	No	-0.353537	0	295	174	No	ARM	1100	177	107	0	1.03629	0.546227	0	0	0	0	0	0
C29F9.9	chrIII	98396	98921	-	No	-0.203019	0	93	0	No	ARM	52	52	24.2692	0	0	0	0	0	0	0	0	0
C29G2.1	chrV	2591173	2591939	+	No	-0.23104	0	0	67	No	ARM	126	126	39.0714	0.717759	0	0.698275	1.52726	13.9444	0.173604	0	0	6.12485
C29G2.2	chrV	2590390	2590819	+	No	-0.271417	0	0	201	No	ARM	132	132	29.1212	0	3.89659	5.5862	8.90216	40.2688	0.635108	0	0	1.9105
C29G2.3	chrV	2580870	2582938	+	No	-0.480441	188	0	770	No	ARM	1005	161	32.9512	0.601292	0	0	0.614756	0	0	0	0	0.436314
C29G2.4	chrV	2577901	2579815	+	No	-0.434934	338	0	659	No	ARM	575	575	36.1176	0	0.476269	0	0	0	0	0	0	0
C29G2.5	chrV	2574179	2576797	+	No	-0.353917	0	0	412	No	ARM	797	797	48.9811	0	0.431315	0	0.543307	0	0.00312946	0	0	0
C29G2.6	chrV	2582858	2585907	-	YES	-0.449062	180	582	935	No	ARM	1337	129	77.5277	21.1471	20.5513	13.0201	31.0087	1.52106	0.781116	1.46	0	109.387
C30D11.1	chrIII	4138685	4146421	+	No	-0.416653	0	109	705	No	ARM	7820	193	67.4265	7.15804	21.5415	7.30213	3.56256	0.938548	0.375831	0	0	300.626
C30E1.2	chrX	16926890	16927950	+	No	-0.302018	0	0	0	No	ARM	85	55	13.2	0	0	0.510212	0	0.0456634	0	0	0	0
C30E1.3	chrX	16925919	16926748	+	No	-0.236019	0	0	222	No	ARM	54	54	3.34783	0	0.695785	0	0	0.162328	0	0	0	0
C30E1.4	chrX	16923862	16925727	+	No	-0.449299	0	0	77	No	ARM	513	469	11.8421	2.40448	1.21076	0	0	0	0	0	0	0
C30E1.5	chrX	16921779	16922788	+	No	-0.132224	0	0	0	No	ARM	49	49	1.83673	2.30506	2.0472	0	0	0	0	0	2.39	0
C30E1.6	chrX	16915768	16916750	+	No	-0.203182	0	0	333	No	ARM	77	77	6.80435	0	0.448918	0	0	0	0	0	0	0
C30E1.7	chrX	16914956	16915473	+	No	-0.2365	0	0	0	No	ARM	58	58	10.5345	0	0	0	0	0	0	0	0	0
C30E1.8	chrX	16916738	16919246	-	No	-0.31436	0	0	56	No	ARM	372	372	39.8095	0	0.621777	0	0	0	0	0	0	0
C30E1.9	chrX	16929840	16931546	+	No	-0.22902	0	0	1262	No	ARM	148	148	3.45946	94.0145	289.635	83.6495	80.4517	27.2433	2.16207	0	0	7730.43
C30F2.1	chrX	16072830	16074780	+	No	-0.270408	0	0	79	No	ARM	853	853	26.9953	1.44408	2.59043	0	0.532922	0.426174	0.00289153	0	0	0
C30F2.2	chrX	16076704	16085142	-	No	-0.392717	215	61	1525	No	ARM	4580	1139	21.9725	0.528145	1.40703	0	0	0.0184464	0	0	0	11.8407
C30F2.3	chrX	16082226	16085655	+	No	-0.301243	0	0	926	No	ARM	836	206	42.9374	0.939671	18.8307	9.12352	4.61758	0.0627635	0.0275622	0	1.88	17.6942
C30F2.4	chrX	16074988	16075596	-	No	-0.371309	0	0	339	No	ARM	395	395	5.84304	2.93331	10.196	1.9473	1.9473	0	0	0	0	76.2822
C30F2.5	chrX	16093994	16096365	+	No	-0.34598	53	0	161	No	ARM	1016	1016	40.3415	6.808	16.8979	6.02832	10.8967	0.965808	0.228285	0	0	1.29348
C30G4.2	chrX	17044041	17045424	-	No	-0.26246	0	0	1009	No	ARM	266	176	24.0568	0	0.408198	0	0	0.0325434	0.0112169	0	0	1.93846
C30G4.3	chrX	17046187	17055480	-	No	-0.611812	833	43	0	No	ARM	1279	863	28.0718	2.28853	4.09968	2.10882	1.18941	0.0507346	0.0223552	0	0	7.37486
C30G4.4	chrX	17059145	17069134	-	No	-0.339758	0	54	1398	No	ARM	5414	5414	42.3297	2.28557	8.5976	3.68716	2.80078	1.89852	1.00591	5.68	0	11.5916
C30G4.5	chrX	17071807	17072114	-	No	-0.19486	0	0	0	No	ARM	43	43	2.09302	0	6.30498	3.16563	1.86523	0	0	0	0	0
C30G4.6	chrX	17073735	17080324	-	No	-0.57047	446	885	777	No	ARM	2095	562	38.0893	1.36279	0.283209	0	0.274941	0.00911396	0	0	0	0
C30G4.7	chrX	17056852	17058462	-	No	-0.315052	0	0	24	No	ARM	803	803	16.2403	2.5846	11.6488	3.69152	8.84126	2.58253	1.34205	26.76	0	137.302
C30H6.1	chrIV	17351863	17357895	+	No	-0.358814	0	0	59	No	ARM	620	258	30.8766	0	4.28301	2.224	1.45355	0	0.0089299	0	0	0
C30H6.10	chrIV	17368555	17370578	+	No	-0.295033	0	88	0	No	ARM	640	640	23.5436	2.05656	15.4978	4.4301	2.72952	0	0.0176622	0	0	156.08
C30H6.12	chrIV	17383398	17386746	+	No	-0.290418	0	39	0	No	ARM	1735	1735	40.3542	0.789535	0	1.54764	0.911889	0	0.142233	0	0	0
C30H6.2	chrIV	17364964	17366454	-	No	-0.297917	0	0	0	No	ARM	118	48	31.8261	3.17564	2.52623	2.13651	1.51534	0.0940422	11.1362	0	0	0
C30H6.3	chrIV	17358866	17360598	+	No	-0.316773	0	0	0	No	ARM	194	194	9.51852	0	1.44606	0.377474	0	0	0	0	0	0
C30H6.4	chrIV	17361405	17364546	+	No	-0.320955	0	0	0	No	ARM	566	442	23.8604	0.436615	0	0	0	0	0.00714349	0	0	0
C30H6.5	chrIV	17371731	17375594	+	No	-0.311243	0	56	83	No	ARM	1513	1513	22.5929	4.0048	9.86484	6.54673	5.48047	0.0324972	0.00182192	0	0	1.15617
C30H6.6	chrIV	17376387	17379280	+	No	-0.439272	38	0	272	No	ARM	452	452	33.1591	2.96376	3.18956	2.00457	1.53403	4.28253	0.11674	0	0	6.26309
C30H6.7	chrIV	17380595	17382193	+	No	-0.313234	0	0	340	No	ARM	235	235	14.2667	46.0195	99.8268	122.309	110.561	170.225	54.4535	56.47	10.21	154.071
C30H6.8	chrIV	17382286	17383050	+	No	-0.280061	0	0	0	No	ARM	76	49	9.76316	19.8876	8.7322	20.4708	27.389	95.2077	70.7285	2.79	1.59	12.4152
C30H6.9	chrIV	17379024	17380133	-	No	-0.15142	0	0	65	No	ARM	69	69	8.49275	12.3804	14.2907	14.8247	13.4718	67.1545	11.8775	4.11	0	18.387
C31A11.1	chrV	16292688	16295580	+	No	-0.29713	0	0	0	No	ARM	204	46	36.8444	0	0	0	0	0	0.00161911	0	0	0
C31A11.10	chrV	16298948	16299842	+	No	-0.298039	0	0	0	No	ARM	51	51	15.3922	0	0	0	0	0	0	0	0	0
C31A11.3	chrV	16297349	16298258	+	No	-0.210368	0	0	909	No	ARM	57	57	3.15789	0	0.427842	0	0	0	0	0	0	0
C31A11.4	chrV	16300555	16301458	+	No	-0.184315	0	0	0	No	ARM	54	54	8.90741	0	0	0	0	0.0156864	0	0	0	0
C31A11.5	chrV	16302727	16306136	+	No	-0.403245	0	45	170	No	ARM	554	261	51.4348	0.987901	6.77877	1.59655	1.2817	0.133094	0.130552	0	0	0
C31A11.6	chrV	16307661	16309603	+	No	-0.386386	58	0	0	No	ARM	555	555	33.3027	0	0	0	0	0	0.00449116	0	0	2.77373
C31A11.7	chrV	16309784	16314732	+	No	-0.41583	0	38	1264	No	ARM	2282	53	35.7391	0.190931	2.49877	0.561393	0	0.0425226	0.0115023	0	0	4.14002
C31A11.9	chrV	16315283	16317206	+	No	-0.457227	0	0	565	No	ARM	616	198	23.4497	0	0	0	0	0	0	0	0	0
C31B8.1	chrV	2931428	2932986	+	No	-0.307751	0	46	124	No	ARM	193	193	30.3448	0	0.315876	0	0	0	0	0	0	0
C31B8.10	chrV	2918827	2920006	-	No	-0.38984	0	0	0	No	ARM	75	75	20.4074	0	0	0	0	0	0.00515239	0	0	0
C31B8.11	chrV	2920597	2922692	-	No	-0.402286	158	41	519	No	ARM	878	878	50.6298	0	0.977316	0	0	0	0.0983831	0	0	0
C31B8.12	chrV	2925175	2927720	-	No	-0.516588	104	0	192	No	ARM	566	308	61.8127	0	2.28386	1.41441	1.95911	0	0	3.28	0	0
C31B8.13	chrV	2933140	2934173	-	No	-0.284091	0	0	0	No	ARM	55	55	7.09091	0	0	0	0	0	0	0	0	0
C31B8.14	chrV	2935175	2936197	-	No	-0.254955	0	0	0	No	ARM	44	44	3.54545	0	0	0	0	0	0	0	0	0
C31B8.16	chrV	2930050	2931168	+	No	-0.410039	0	0	66	No	ARM	269	51	31	0	0	0	0	0	0	0	0	0
C31B8.2	chrV	2916520	2917702	+	No	-0.349955	0	0	83	No	ARM	357	357	35.449	0	0	0	0	0	0.00816057	0	0	0
C31B8.3	chrV	2914245	2916170	+	No	-0.339224	0	0	94	No	ARM	510	510	33.3013	0	0	0	0.494398	0	0.0191415	0	0	0
C31B8.4	chrV	2896634	2898415	+	No	-0.26042	0	0	0	No	ARM	374	374	37.6016	0	0.887536	1.45423	1.51946	0.257202	0.11367	3.2	0	0.640818
C31B8.6	chrV	2898433	2899965	-	No	-0.357388	0	56	220	No	ARM	436	436	43.08	0	0	0	0	0.0152835	0.0496886	0	0	0
C31B8.7	chrV	2900445	2903308	-	No	-0.306364	0	251	399	No	ARM	709	368	57.3846	13.8259	7.46466	3.93376	1.76995	0.011871	0.0369934	0	0	0
C31B8.8	chrV	2905761	2909681	-	No	-0.471167	70	110	415	No	ARM	1157	318	38.3129	0.24865	12.8477	15.2193	12.5846	0.862567	0.615476	0	0	2.79428
C31B8.9	chrV	2911165	2912999	-	No	-0.347227	0	0	405	No	ARM	644	644	38.9026	0	0	0	0	0.0133168	0	0	0	0
C31C9.1	chrII	13632584	13636912	+	No	-0.39476	0	1118	1105	No	ARM	988	861	20.2904	12.6177	58.0109	41.2848	22.8106	1.95825	0.969521	2.09	0	0
C31C9.2	chrII	13636912	13638415	-	No	-0.398077	0	49	142	No	ARM	352	352	12.2642	524.864	288.553	219.323	64.5666	20.9342	1.00582	3.48	1.13	25.5804
C31C9.3	chrII	13641491	13643753	+	No	-0.417668	0	384	632	No	ARM	926	926	28.5022	5.36862	10.6448	3.2886	1.59035	1.30644	0.424275	2.37	0	15.1478
C31C9.4	chrII	13645710	13648780	+	No	-0.354621	0	0	0	No	ARM	1864	1864	26.5306	2.12341	1.57624	0.39278	0.997826	0.826457	0.00226063	0	0	0
C31C9.6	chrII	13655813	13662011	-	No	-0.362796	0	0	1590	No	ARM	2005	2005	34.6742	1.05745	5.00834	5.73098	2.79816	0.0331421	0.0192469	2.15	0	0.546059
C31C9.7	chrII	13669033	13669643	+	No	-0.251157	0	0	57	No	ARM	140	140	55.6714	1.32935	8.63419	6.85576	6.74446	2.23618	1.14042	0	2.9	64.6429
C31C9.8	chrII	13649427	13655277	+	No	-0.441605	400	185	1623	No	ARM	3177	3177	29.9049	2.76059	0	0.353602	0.353602	0.821041	0.0228383	0	0	1.17675
C31G12.1	chrV	18179933	18181261	+	No	-0.391458	0	173	280	No	ARM	638	638	55.8103	52.5534	0	4.5437	16.3321	19.8747	0.026615	0	0	0
C31G12.2	chrV	18186036	18188232	-	No	-0.46087	69	426	706	No	ARM	852	852	25.4321	0	0.574954	0	1.00778	0	0.0114293	0	0	0
C31G12.3	chrV	18185181	18185433	+	No	-0.216167	0	0	0	No	ARM	42	42	4.04762	0	0	0	0	0	0	0	0	0
C31G12.4	chrV	18176745	18178682	-	No	-0.404581	160	0	0	No	ARM	544	544	11.3091	1.77405	0.421899	0	0	0.220116	4.38959	0	0	0
C32A3.1	chrIII	3613202	3627125	-	No	-0.356269	461	1066	750	No	ARM	8532	1251	110.761	23.6392	7.44373	8.28291	20.9886	40.2892	4.49362	2.06	0	18.7501
C32A3.2	chrIII	3628222	3630349	-	No	-0.305486	0	58	628	No	ARM	838	838	136.696	33.3119	80.7279	90.7031	76.4349	61.8337	20.2286	0	0	5.19467
C32A3.3	chrIII	3637465	3643329	+	No	-0.368252	0	88	233	No	ARM	2548	2548	161.148	15.2339	24.0887	13.2527	15.4897	54.7979	3.67238	2.12	2.27	164.773
C32B5.1	chrII	986009	988674	+	No	-0.549326	68	0	239	No	ARM	1020	132	58.8596	14.3855	2.08036	0	1.38223	2.64536	0.00429084	0	0	0
C32B5.10	chrII	946492	948188	-	No	-0.340703	0	0	98	No	ARM	298	91	32.8423	21.3486	1.44315	1.90409	6.49679	50.3442	0.48604	0	0	78.045
C32B5.11	chrII	948450	949654	-	No	-0.35026	0	0	0	No	ARM	215	215	9.25116	0.699659	1.45576	0	0	0	0	0	0	0
C32B5.12	chrII	951993	952850	-	No	-0.495892	101	0	49	No	ARM	286	286	3.1958	4.92439	0	0	0	1.07886	0	0	0	0
C32B5.13	chrII	961358	961915	-	No	-0.255063	0	0	0	No	ARM	56	48	61.75	1.37924	0	0	0	0	0	0	0	0
C32B5.14	chrII	965586	966966	-	No	-0.210827	0	0	0	No	ARM	59	52	63.6441	35.3922	0	0.326852	2.65508	0.00645547	0.00557518	0	0	0
C32B5.15	chrII	970651	972957	-	YES	-0.479787	508	0	394	No	ARM	1176	1176	25.9149	18.9012	0.569278	0.934499	1.01818	0.0280115	0	0	0	0.751898
C32B5.16	chrII	958967	960186	+	No	-0.218556	0	0	0	No	ARM	54	54	55.0741	56.5785	1.10777	0	2.20618	0.224636	0	0	0	0
C32B5.17	chrII	976214	978958	-	No	-0.340323	0	0	1752	No	ARM	2019	2019	19.0867	1.17614	0	0	0	0.132645	0	0	0	0
C32B5.2	chrII	983148	984627	+	No	-0.314058	268	0	0	No	ARM	378	378	10.5476	0	0	0	0	0	0	0	0	0
C32B5.3	chrII	981288	982440	+	No	-0.329632	0	0	0	No	ARM	205	125	12.7805	0.518673	0	0	0	0	0	0	0	0
C32B5.4	chrII	979429	980832	+	No	-0.360932	0	0	0	No	ARM	265	265	49.2364	2.12152	0	0	0.454681	0.0135401	0	0	0	0
C32B5.5	chrII	974296	975518	+	No	-0.297616	0	0	0	No	ARM	198	198	18.0351	11.5365	0.376961	0	2.54612	0.0997681	0	0	0	0
C32B5.6	chrII	968412	970530	+	No	-0.318943	0	96	390	No	ARM	877	877	63.8788	0	0	0.741995	2.76588	0.149808	0.113923	0	0	0
C32B5.7	chrII	960534	964288	+	No	-0.393734	0	0	197	No	ARM	3042	3042	16.6316	0.953886	0.556521	0	0.975465	0	0	0	0	0
C32B5.8	chrII	956680	957968	+	No	-0.27558	0	0	0	No	ARM	343	343	18.07	0	1.70034	0	0	0.0105625	0.00826634	0	0	0
C32B5.9	chrII	954054	956344	+	No	-0.283859	0	0	0	No	ARM	821	821	13.1449	0	0.717943	0	0	0	0.00245249	1.33	0	3.91619
C32E8.1	chrI	3796155	3796699	+	No	-0.243944	0	0	61	No	ARM	54	54	1.66667	0.8701	0	0	1.30394	0.454056	10.1509	0	0	0
C32E8.10	chrI	3799126	3805721	-	No	-0.395431	135	92	1030	No	ARM	3167	478	130.052	26.9234	31.2232	19.7808	25.0357	57.3434	11.3591	16.62	0	980.283
C32E8.11	chrI	3807459	3816799	-	No	-0.377619	208	0	176	No	ARM	553	512	65.6934	26.4732	27.6416	36.9237	42.8216	80.2202	38.0851	3.85	1.86	55.1746
C32E8.12	chrI	3773873	3774578	-	No	-0.334338	0	0	0	No	ARM	444	444	20.6486	0	0	0	0	0.126329	0	0	0	0
C32E8.2	chrI	3788036	3788914	+	No	-0.340473	0	0	0	YES	ARM	510	510	22.3107	420.284	2021.3	1965.04	1252.53	6163.01	2630.86	5112.09	22.72	2462.56
C32E8.3	chrI	3786596	3787498	+	No	-0.282114	0	0	161	No	ARM	150	44	37.8133	78.4456	69.681	64.7802	60.0926	132.945	36.9223	14.44	2.22	90.9663
C32E8.4	chrI	3783837	3784438	+	No	-0.109647	0	0	0	No	ARM	51	51	13.4118	0	0	4.52482	17.037	0.834325	276.634	0	0	0
C32E8.5	chrI	3782120	3783299	+	No	-0.30808	0	0	0	No	ARM	50	50	37.5417	35.5961	12.329	19.8489	38.1575	180.677	43.7913	8.51	3.86	121.966
C32E8.6	chrI	3774708	3777471	+	No	-0.378981	0	43	481	No	ARM	471	373	49.9583	0.91147	0.762658	0.513657	0.255876	0.00530812	0.0179463	0	0	0.256971
C32E8.7	chrI	3778092	3781661	-	No	-0.419733	0	0	125	No	ARM	757	513	41.2335	3.29258	4.14639	4.12602	2.44469	1.64063	0.760298	6.18	0	65.7704
C32E8.8	chrI	3789308	3792800	-	No	-0.278136	0	57	0	YES	ARM	330	330	39.6182	33.0337	11.2964	11.8429	34.3188	285.452	13.5858	0	1.88	1.93974
C32E8.9	chrI	3794555	3798056	-	No	-0.497854	386	0	253	No	ARM	2187	309	32.3529	12.4588	24.3858	27.9696	19.5683	24.2827	8.49366	1.17	0	2.21291
C32H11.1	chrIV	12912765	12914945	-	No	-0.303283	0	0	399	No	ARM	158	46	11.3165	0	4.81866	0	0	0.0247241	0.00206034	0	0	0
C32H11.10	chrIV	12936713	12937924	+	No	-0.215703	111	0	275	No	ARM	64	64	3.625	0	0.331383	0	0	0	0.00394809	0	0	0
C32H11.11	chrIV	12938188	12939047	+	No	-0.249969	271	0	0	No	ARM	256	256	16.332	0	0	0	0	0	0	0	0	0
C32H11.12	chrIV	12940117	12941344	-	No	-0.226681	33	0	644	No	ARM	47	47	13.4043	0	25.2929	4.81203	11.4699	0.652321	0.175447	23.16	0	0.827333
C32H11.13	chrIV	12942908	12944502	+	No	-0.261759	0	0	63	No	ARM	219	54	42.1786	0	0	0	0	0	0	0	0	0
C32H11.16	chrIV	12927658	12928101	-	No	-0.289079	0	0	0	No	ARM	63	63	23.3651	0	0	0	0	0	0	0	0	0
C32H11.2	chrIV	12916018	12917269	+	No	-0.356571	0	0	0	No	ARM	101	49	21.802	0	0	0	0	0	0	0	0	0
C32H11.3	chrIV	12918586	12920196	+	No	-0.300197	0	0	0	No	ARM	279	279	23.8936	0.411931	0.490074	0.548782	0	0.0983009	0	0	0	0
C32H11.4	chrIV	12921263	12923266	+	No	-0.369718	0	0	0	No	ARM	560	560	27.9661	19.0295	17.5839	3.28993	14.6371	0.254789	0.0753505	1.72	0	0.273249
C32H11.5	chrIV	12923500	12924354	-	No	-0.201953	0	0	0	No	ARM	129	129	12.9457	6.38749	23.8342	7.5739	1.14421	0	0	0	0	0.520144
C32H11.6	chrIV	12925904	12926712	-	No	-0.259529	0	0	0	No	ARM	223	223	10.1659	0	3.08926	0	0	0	0	0	0	0
C32H11.7	chrIV	12930682	12931490	+	YES	-0.247967	0	0	0	No	ARM	151	123	108.385	4.88165	1.30058	3.19058	8.99237	0	0	0	0	0
C32H11.8	chrIV	12933903	12934747	-	No	-0.249969	256	0	0	No	ARM	256	256	12.1797	0	0	0	0	0	0	0	0	0
C32H11.9	chrIV	12935026	12936247	-	No	-0.215703	111	0	0	No	ARM	64	64	15.6562	0	0.714203	0	0	0	0	0	0	0
C33A11.1	chrX	15355166	15363795	+	No	-0.397614	341	0	2020	No	ARM	1637	1302	16.2631	7.15814	43.4754	19.0502	9.49312	1.18464	0.703141	13.64	3.49	581.929
C33A11.2	chrX	15365924	15369931	+	No	-0.388459	259	0	558	No	ARM	1021	918	34.2232	13.8073	4.22043	3.2773	5.5656	11.2372	1.47097	4.82	0	111.546
C33A11.4	chrX	15369826	15377616	-	No	-0.369091	0	61	913	No	ARM	4567	298	17.926	5.54865	8.86082	4.63485	2.96318	0.249292	0.0966845	2.12	1.17	52.3369
C33B4.2	chrII	11370250	11372009	-	No	-0.294311	0	0	72	No	ARM	436	280	22.0528	2.58009	0	0.880168	0.438452	0	0.00803904	0	0	0
C33B4.3	chrII	11384520	11390798	-	No	-0.379014	0	39	183	No	ARM	914	70	26.6414	26.6434	13.6151	5.66478	1.34728	1.3399	0.115919	0	1.27	45.0694
C33B4.4	chrII	11375553	11376207	-	No	-0.237428	0	0	0	No	ARM	138	138	5.53623	7.15185	11.4903	5.94766	6.27666	50.858	21.2822	6.53	2.23	62.3703
C33B4.5	chrII	11383262	11384506	+	No	-0.334472	0	49	130	No	ARM	506	506	27.3221	0	0	0	0	0	0	0	0	3.20604
C33C12.1	chrII	2197850	2198680	+	No	-0.3355	0	0	303	No	ARM	368	368	86.913	0	0	0	0	0.138286	0.0190821	0	0	1.44562
C33C12.10	chrII	2192356	2194119	-	No	-0.368594	506	0	638	No	ARM	699	699	219.352	34.0374	9.43586	5.45985	7.05366	22.4151	7.3273	0	0	178.808
C33C12.3	chrII	2176896	2181980	+	No	-0.483297	358	50	668	No	ARM	756	528	105.256	2.5994	33.2984	18.7188	12.8897	0.514002	0.153145	4.39	0	0.196759
C33C12.4	chrII	2165222	2166498	-	No	-0.384141	0	0	57	No	ARM	297	297	60.5676	1.5254	0	7.69956	7.07895	0.124775	10.7181	0	0	0
C33C12.5	chrII	2167392	2168764	-	No	-0.33338	31	0	167	No	ARM	295	295	58.9797	20.6045	0	0.403086	1.36017	0.0136392	4.03715	0	0	1.73532
C33C12.6	chrII	2170329	2173224	-	No	-0.458594	151	1246	1287	No	ARM	1687	1687	111.287	0	1.47462	0	0	0	0.0110193	0	0	0
C33C12.7	chrII	2174617	2175462	-	No	-0.364415	0	0	49	No	ARM	207	207	28.7778	0	0.767413	4.13796	1.74642	0.0452178	13.3552	0	0	3.08512
C33C12.8	chrII	2182363	2186438	-	No	-0.456656	362	45	440	No	ARM	612	326	97.1572	2.60432	21.6419	1.05603	0.812785	0.124494	0.0210109	0	0	0
C33C12.9	chrII	2187152	2189462	-	YES	-0.365311	455	76	763	No	ARM	827	827	71.7583	15.9301	22.8923	15.3606	13.9828	33.5468	9.88969	0	0	36.9756
C33E10.1	chrX	17305272	17306233	+	No	-0.167067	0	0	118	No	ARM	45	45	1.33333	9.85159	1.66136	0	1.77267	0.290572	0.00271219	1.4	0	33.2257
C33E10.10	chrX	17301299	17301849	-	No	-0.290965	0	0	0	No	ARM	142	142	0.985915	0	0	0	0	0.0372231	0	0	0	0
C33E10.2	chrX	17302677	17303945	+	No	-0.325627	0	0	0	No	ARM	67	67	12.0299	2.58765	0.65798	1.77673	0.950997	8.77237	0.50471	0	0	0.916263
C33E10.3	chrX	17284264	17285375	+	No	-0.186196	0	0	50	No	ARM	46	46	1.95652	6.7638	1.2745	0.556853	2.0747	0.152045	0.0124417	0	0	0
C33E10.5	chrX	17272859	17279458	+	No	-0.347803	246	83	254	No	ARM	1484	727	33.4704	0	0	0	0	0	0.00181074	0	0	0
C33E10.6	chrX	17266620	17269886	+	No	-0.35781	0	0	192	No	ARM	221	221	3.49321	0	0	0	0	0.00240409	0	0	0	0
C33E10.7	chrX	17286199	17287490	-	No	-0.214338	0	0	0	No	ARM	133	133	2.96241	0	0	0	0	0	0	0	0	0
C33E10.8	chrX	17292919	17294464	-	No	-0.31701	0	47	0	No	ARM	508	508	19.8563	1.94254	0.489129	1.09545	1.42455	0.0309907	0.0210263	0	0	0
C33E10.9	chrX	17296569	17297157	-	No	-0.403323	0	0	0	No	ARM	99	99	9.49495	1.31813	6.25423	2.63819	0.875053	0	0	0	0	0
C34C12.1	chrIII	3454332	3455838	+	No	-0.239929	0	0	300	No	ARM	45	42	2.71429	0	0	0	0	0.0957528	0.0298453	0	0	0
C34C12.2	chrIII	3456464	3460092	+	No	-0.474989	231	349	595	No	ARM	552	462	92.6	20.582	9.51703	9.50256	17.6529	90.6738	18.6825	1.65	0	16.2989
C34C12.3	chrIII	3461690	3467650	+	No	-0.423889	258	908	926	No	ARM	1466	521	279.288	79.6203	30.1379	35.2251	44.072	60.4644	20.4576	0	0	100.101
C34C12.4	chrIII	3467281	3469814	-	No	-0.430691	294	0	399	No	ARM	1058	1058	43.8601	16.4304	14.4882	16.0708	15.455	45.8499	68.8873	154.15	0	41.0768
C34C12.5	chrIII	3471988	3473976	+	No	-0.514841	0	0	599	No	ARM	466	466	17.0588	99.9255	82.5554	59.4049	47.0716	20.5095	4.19285	7.48	1.2	182.654
C34C12.6	chrIII	3482577	3484835	+	No	-0.326052	0	230	268	No	ARM	491	291	35.5945	69.6084	21.5965	12.6013	2.19273	0.145858	0.0634701	0	0	5.35249
C34C12.7	chrIII	3484801	3488273	-	No	-0.377842	60	168	605	No	ARM	1996	76	37.2917	3.15414	18.9399	16.4283	9.17054	2.49384	1.1557	0	0	1.55109
C34C12.8	chrIII	3460391	3461583	+	No	-0.304727	0	0	470	No	ARM	121	121	54.4463	50.6894	80.5373	84.7951	95.0656	125.701	43.7511	16.3	1.2	14.7168
C34C12.9	chrIII	3474242	3475437	-	No	-0.371717	85	0	497	No	ARM	580	580	14.25	1.97818	5.21472	8.23733	11.4435	4.87057	2.38377	0	0	0.480547
C34H4.1	chrIV	1555578	1557561	+	YES	-0.32974	6	0	412	No	ARM	315	315	33.2749	0.346625	10.426	8.40891	5.42125	0.15635	0.185203	0	0	0
C34H4.2	chrIV	1553788	1555566	+	No	-0.288115	0	0	0	No	ARM	96	52	27.3646	2.63856	14.1319	20.923	9.58565	1.06159	0.583177	1.78	0	0.441999
C34H4.3	chrIV	1550927	1553045	+	No	-0.415494	0	0	838	No	ARM	247	247	71.1778	2.52165	10.8026	7.27676	4.91748	0.283232	0.071669	9.98	0	0.391445
C34H4.4	chrIV	1548722	1549717	+	No	-0.360965	0	114	40	No	ARM	114	114	38.6786	74.6228	488.003	324.937	48.4181	3.62535	1.1196	1.63	2.01	182.585
C35B1.1	chrIV	4103010	4105350	+	No	-0.368913	0	813	944	YES	ARM	913	655	352.134	43.0992	79.052	54.3603	48.6925	84.2171	34.0222	57.33	10.81	856.725
C35B1.2	chrIV	4086202	4102901	+	YES	-0.78604	3002	885	4187	No	ARM	7247	1697	390.536	17.2212	15.9071	13.6864	12.5008	25.8347	5.79195	1.79	0	29.1012
C35B1.4	chrIV	4079797	4080385	+	No	-0.300503	37	0	0	No	ARM	183	183	7.96175	0	0	23.4971	84.7015	0.117548	0.164525	0	0	0
C35B1.5	chrIV	4083580	4084208	-	No	-0.284042	0	0	0	No	ARM	71	71	55.6056	97.7008	253.566	294.422	251.398	24.6502	15.0932	235.85	4.65	31.4324
C35B1.7	chrIV	4109057	4110463	+	No	-0.388006	0	43	233	No	ARM	965	965	15.9223	0.966778	14.774	7.30659	4.29033	0.0440204	0.129972	1.35	0	81.4113
C35B1.8	chrIV	4077663	4078946	-	No	-0.395895	0	0	725	No	ARM	514	514	18.0195	1.37924	2.86974	0.915619	4.5001	0.0319645	0	0	0	0
C35B1.9	chrIV	4080163	4080939	-	No	-0.362891	74	0	0	No	ARM	457	457	24.5733	0	3.62786	0	2.00291	0.317236	0	0	0	0
C35D6.1	chrIV	16339632	16341342	+	No	-0.340753	699	0	261	No	ARM	647	647	13.0385	0	0	0	0	0	0	0	0	0
C35D6.10	chrIV	16332852	16334429	+	No	-0.496772	0	400	0	No	ARM	574	574	16.717	0	0	0	0	0	0	0	0	0
C35D6.11	chrIV	16348376	16348719	-	No	-0.20022	0	0	0	No	ARM	59	59	18.9153	0	0	0	0	0	0	0	0	0
C35D6.12	chrIV	16338529	16339066	-	No	-0.203651	47	0	330	No	ARM	65	43	4.18462	0	0	0	0	0	0	0	0	0
C35D6.13	chrIV	16337242	16338406	+	No	-0.329303	0	0	0	No	ARM	231	231	2.25108	0	0	0	0	0	0	0	0	0
C35D6.2	chrIV	16342457	16344167	-	No	-0.340753	699	0	98	No	ARM	647	647	2.69231	0	0	0	0	0	0	0	0	0
C35D6.3	chrIV	16347135	16347398	+	No	-0.0965085	0	0	0	No	ARM	59	59	16.2712	0	0	0	0	0	0	0	0	0
C35D6.5	chrIV	16366963	16368911	+	No	-0.445825	0	0	0	No	ARM	435	314	12.0092	0	0	0	0	0	0.00535925	1.1	0	0
C35D6.8	chrIV	16341592	16345410	+	No	-0.359928	2999	0	546	No	ARM	3185	3185	11.0452	0	0	0	0	0	0	0	0	0
C35D6.9	chrIV	16336016	16336471	+	No	-0.227706	0	0	195	No	ARM	119	119	46.8739	0	0	0	0	0	0	0	0	0
C35E7.1	chrI	10846766	10850094	+	No	-0.29682	0	69	0	No	ARM	533	533	29.5849	182.006	2.19404	0.539838	12.1165	6.30695	0.00585297	0	0	0.976166
C35E7.10	chrI	10810636	10812854	-	No	-0.364035	0	0	0	YES	ARM	333	256	12.8182	3.17565	0	4.32982	7.07461	0.457543	68.4461	0	0	0
C35E7.11	chrI	10844758	10845961	+	No	-0.358786	0	0	397	No	ARM	401	42	31.0075	6.11907	24.7594	3.88746	2.03437	0.689022	0.0331058	7.86	0	2034.42
C35E7.2	chrI	10841102	10844636	+	No	-0.428511	0	0	351	No	ARM	444	45	29.9592	8.39515	13.0724	2.91598	1.08931	0.200057	0.0125887	0	1.41	82.9073
C35E7.3	chrI	10836974	10838866	+	No	-0.265281	0	0	98	No	ARM	413	413	62.3027	42.3	0	0	3.76141	1.07012	0	0	0	0.816956
C35E7.4	chrI	10831889	10834801	+	No	-0.35727	121	42	159	No	ARM	770	770	33.8506	35.7627	18.3692	5.88211	5.98874	0.641892	0.229271	4.51	0	65.6981
C35E7.5	chrI	10823346	10828671	+	YES	-0.308085	0	0	220	No	ARM	532	434	32.2636	176.062	3.62579	0.917168	17.2271	5.4515	0.184015	0	0	0.164259
C35E7.6	chrI	10817348	10819098	+	YES	-0.296365	0	0	0	No	ARM	438	438	33.377	105.975	30.1222	16.2382	17.1128	6.42545	0.504532	1.94	0	53.4724
C35E7.7	chrI	10813803	10814929	+	No	-0.290935	0	0	0	No	ARM	619	619	20.2682	0	0	0	0	0	0	0	0	0
C35E7.8	chrI	10808595	10810488	+	No	-0.364543	0	49	273	No	ARM	256	256	52.5216	6.0721	1.66379	12.0723	23.2289	36.2937	23.1799	0	0	0.316605
C35E7.9	chrI	10807052	10808227	+	No	-0.233468	0	0	51	No	ARM	47	47	10.9333	0	0	2.71177	2.49786	0.44225	33.8106	0	0	0.268773
C36A4.1	chrIII	3832580	3834570	+	No	-0.308574	0	0	345	No	ARM	80	47	20.7333	0	3.87287	3.26293	10.2596	0.044036	0.0234891	1.34	0	0
C36A4.10	chrIII	3829811	3830217	-	No	-0.254396	0	0	0	No	ARM	195	48	18.6939	15.4446	10.1516	0	0	0	0	0	0	25.6862
C36A4.11	chrIII	3840576	3841132	+	No	-0.100603	0	0	254	No	ARM	58	58	36.6897	4.22146	4.36092	1.66576	2.94876	0.435098	0.052261	49.57	0	0
C36A4.12	chrIII	3855053	3856913	+	YES	-0.275851	0	498	63	No	ARM	62	47	87.4839	0.518552	0.208179	1.12605	0.281222	0.0420152	0.00599183	0	0	0
C36A4.14	chrIII	3830259	3832221	-	No	-0.327393	0	0	64	No	ARM	793	56	74.0364	23.9882	8.62178	4.3682	1.78662	0.893113	0.0677528	0	0	0
C36A4.2	chrIII	3835201	3837131	+	No	-0.288163	274	0	169	No	ARM	122	49	23.5741	5.58771	26.1051	16.3729	16.9104	0.250735	0.0912128	6.93	0	0
C36A4.3	chrIII	3837522	3839459	-	YES	-0.269234	222	0	86	No	ARM	77	47	21.3725	32.7454	24.8137	6.95704	8.94761	0.105833	0.0427453	0	0	0.395758
C36A4.4	chrIII	3841239	3843598	-	No	-0.335105	0	0	109	No	ARM	503	503	67.5785	18.9768	21.0795	55.4967	99.1377	84.8187	13.2865	4.51	0	1.61995
C36A4.5	chrIII	3844256	3848244	+	No	-0.305438	0	44	424	No	ARM	378	297	79.5132	3.85396	1.89775	6.61957	16.467	50.8914	5.89336	0	0	5.40956
C36A4.6	chrIII	3849888	3852053	-	No	-0.358057	0	0	36	No	ARM	185	87	29.6667	5.37442	9.50373	5.45276	4.53785	0.821928	0.146193	1.08	0	9.77344
C36A4.8	chrIII	3853086	3862940	-	No	-0.406037	695	649	379	No	ARM	3962	2058	153.811	14.2204	4.07557	7.70299	18.0041	47.6683	9.56872	0	0	0.140282
C36A4.9	chrIII	3864017	3867080	+	No	-0.269958	0	0	0	No	ARM	402	402	80.9516	26.9234	124.988	88.9696	100.767	393.981	67.397	770.54	8.09	237.318
C36C5.1	chrV	3179524	3181060	+	No	-0.309976	0	0	12	No	ARM	359	82	63.2507	0	0	0	0	0.00923184	0.0211814	0	0	0
C36C5.10	chrV	3150485	3151960	-	No	-0.356434	0	0	0	No	ARM	299	76	39.6756	0	0	0	0	0	0	0	0	0
C36C5.11	chrV	3153482	3155170	-	No	-0.328728	0	0	0	No	ARM	414	184	53.6667	0	0	0	0	0	0	0	0	0
C36C5.12	chrV	3158426	3159418	-	No	-0.28843	0	0	25	No	ARM	207	207	38.3265	0	0.745922	4.1195	1.21993	0.0579904	0.0314863	0	0	0
C36C5.14	chrV	3164715	3165513	-	No	-0.481621	0	0	0	No	ARM	140	140	32.3462	0	0	2.5641	0	0.205288	0.0156685	0	0	0
C36C5.15	chrV	3167965	3168748	-	No	-0.374409	0	0	0	No	ARM	127	127	12.8031	0	0.828802	0.682783	0	0	0.0401916	0	0	0
C36C5.2	chrV	3176458	3177976	+	No	-0.288854	0	64	0	No	ARM	356	356	120.522	0	0	0	0	0	0	0	0	0
C36C5.3	chrV	3170135	3171406	+	No	-0.357359	0	0	121	No	ARM	198	198	13.0196	0	0	0	0	0	0	0	0	0
C36C5.4	chrV	3166738	3167266	+	No	-0.275146	0	0	0	No	ARM	48	48	5.41667	0	0	0	0	0.0443642	0.0382153	0	0	0
C36C5.5	chrV	3157092	3157868	+	No	-0.25302	0	0	0	No	ARM	50	49	38.88	0	0.749227	20.9768	7.01824	0.33126	0.21119	0	0	0
C36C5.6	chrV	3139928	3141288	-	No	-0.310538	0	0	0	No	ARM	221	221	35.5656	0.6292	0.367091	0.571994	0.495891	0.0151066	0	0	0	0
C36C5.7	chrV	3143091	3144562	-	No	-0.439033	0	51	212	No	ARM	364	364	17.6346	0	0	0	0	0.040522	0	0	0	0
C36C5.8	chrV	3145200	3146904	-	No	-0.4059	0	0	362	No	ARM	491	491	5.11628	0	0.823225	0.430712	0.430712	0.161549	0	0	0	3.95844
C36C5.9	chrV	3148212	3149487	-	No	-0.326989	0	0	0	No	ARM	285	285	9.02817	0	0.944557	0	0	0.0223104	0	0	0	0
C36C9.1	chrX	1682946	1686378	+	No	-0.319353	0	0	947	No	ARM	515	515	36.6522	5.75407	0.136117	1.60604	6.50297	55.1653	0.523309	0	0	0.402671
C36C9.2	chrX	1671142	1674160	-	No	-0.29242	0	47	1261	No	ARM	362	362	40.6552	2.14214	0	0	0	0.00510616	0	0	0	0
C36C9.3	chrX	1676199	1678102	-	No	-0.271573	0	0	197	No	ARM	274	274	32.9811	5.23052	0.571638	0.815951	3.72204	25.8872	0.193628	0	0	1.02257
C36C9.4	chrX	1692132	1696974	-	No	-0.456268	1330	570	99	No	ARM	667	265	65.4453	0	0	0	0	0	0	0	0	0
C36C9.5	chrX	1699782	1703933	-	No	-0.452784	0	0	245	No	ARM	553	399	37.8856	0.858825	1.19828	0.287191	0	0.00801955	0.00827783	0	0	0.31108
C36C9.6	chrX	1690033	1691507	-	No	-0.321972	1084	0	0	No	ARM	554	530	44.6151	0	0	0	0	0	0	0	0	0
C36E6.1	chrX	17434371	17438007	+	No	-0.355592	0	0	0	No	ARM	835	125	16.3195	28.3787	14.5824	10.9199	11.7184	22.0827	2.49124	7.78	0	49.1016
C36E6.2	chrX	17452317	17455782	+	No	-0.360698	240	0	0	No	ARM	1695	1695	38.3339	54.1338	27.2499	19.8224	15.7169	9.82192	0.410977	6.31	0	27.1459
C36E6.3	chrX	17459085	17460705	+	No	-0.364441	0	0	43	No	ARM	259	143	8.49421	319.655	1216.62	1187.65	845.328	43.3	19.9014	5.44	40.64	252.185
C36E6.5	chrX	17455518	17456520	-	No	-0.176241	0	0	0	No	ARM	54	54	2.03704	324.647	1263.36	1057.31	744.943	52.3879	33.2626	248.89	348.08	3942.9
C36E6.8	chrX	17438545	17439623	+	No	-0.322491	0	0	0	No	ARM	497	497	11.3803	0	0	8.24192	7.85145	3.32769	0.460479	0	0	0
C36E8.1	chrIII	3999267	4004123	-	No	-0.361944	0	0	334	YES	ARM	906	339	80.8618	42.296	77.7832	71.1866	62.3393	183.425	60.7025	22.62	0	23.5843
C36E8.2	chrIII	3989354	3992155	-	No	-0.346387	0	0	581	No	ARM	1260	444	15.0405	10.23	31.7837	6.23471	7.25921	0.283571	0.0367939	0	0	519.988
C36E8.3	chrIII	4006121	4009943	+	No	-0.404891	0	0	104	No	ARM	473	412	44.8133	48.8067	19.249	9.75433	8.55543	3.35855	0.629752	0	0	10.0894
C36E8.4	chrIII	4012315	4015742	+	No	-0.400913	196	0	88	No	ARM	432	46	43.7024	13.1745	12.8743	5.08317	3.17318	1.08621	0.240234	0	0	4.79342
C36E8.5	chrIII	4015747	4017622	-	No	-0.231111	0	0	64	No	ARM	77	72	14.2545	600.936	335.487	348.553	266.856	2491.54	414.291	156.5	15.08	1093.3
C36E8.6	chrIII	3988038	3988555	+	No	-0.336892	0	0	0	No	ARM	241	241	10.0166	0	0	0	0	0	0.241458	0	0	5.59045
C36H8.1	chrIV	12743015	12744715	-	No	-0.449689	0	0	160	YES	ARM	153	132	7.57576	0	0	4.10982	7.78239	0.741945	242.502	0	0	0
C36H8.2	chrIV	12746560	12749698	+	No	-0.335196	0	0	166	No	ARM	914	914	39.7704	24.9052	17.7953	4.84282	1.87578	0.0287994	0.0197044	0	5.15	85.745
C36H8.3	chrIV	12754534	12757650	-	No	-0.353692	0	0	235	No	ARM	1469	1469	24.5049	0.848907	63.881	22.1298	14.3069	0.667987	0.272056	416.88	36.19	2545.36
C37A5.1	chrI	14158497	14161706	-	No	-0.508932	86	215	1044	No	ARM	649	147	114.252	4.62135	2.67151	2.27413	0	0.282737	0.0494306	0	0	0
C37A5.11	chrI	14171851	14172774	+	No	-0.442573	0	0	149	No	ARM	710	710	24.7563	2.2612	33.4129	18.4557	12.4129	4.23379	2.95525	0	0	69.6762
C37A5.2	chrI	14155484	14156322	+	No	-0.265375	0	141	0	No	ARM	48	48	2.76596	1.3969	6.46293	5.75729	8.06734	0.064617	0	0	0	0.710257
C37A5.3	chrI	14154756	14155237	-	No	-0.271167	0	0	0	No	ARM	59	48	11.339	1.251	0	1.07734	4.39645	0.456742	0.035635	0	0	0
C37A5.4	chrI	14153290	14154156	-	No	-0.265375	0	145	0	No	ARM	50	48	3.48936	0.926996	1.71704	1.23079	2.17875	0	0	0	0	5.52961
C37A5.5	chrI	14151855	14152170	+	No	-0.161022	315	0	0	No	ARM	45	45	1.77778	0	2.70016	0	0	0	0	0	0	0
C37A5.6	chrI	14150718	14151029	-	No	-0.169553	311	0	0	No	ARM	47	47	2.12766	0	9.60705	1.57112	1.57112	0	0	0	0	0
C37A5.7	chrI	14163434	14168297	+	No	-0.431381	0	0	667	No	ARM	1316	1316	228.217	9.21905	9.07117	7.89676	9.41627	13.4971	2.35985	0	0	1.21609
C37A5.8	chrI	14157615	14231078	+	No	-0.278195	6562	7739	18043	No	ARM	154	154	19.5779	0	1.89099	0.899729	1.96789	0.432498	0.0097615	0	0	0
C37A5.9	chrI	14172814	14179348	-	YES	-0.457863	1728	0	1523	YES	ARM	920	765	145.491	23.0011	12.9606	10.0119	2.63852	2.54448	0.631659	2.37	0	25.187
C37F5.1	chrIV	2275859	2300351	-	No	-0.361209	985	1296	7786	YES	ARM	729	412	74.1728	14.1839	14.2533	13.7136	8.37415	0.677365	0.477795	8.11	1.16	99.9663
C37H5.10	chrV	4840604	4841255	-	No	-0.306022	0	0	0	No	ARM	226	226	21.1991	0	0	0	0	0	0	0	0	0
C37H5.11	chrV	4841925	4842553	-	No	-0.25771	0	0	0	No	ARM	217	217	23.6175	0	0	0	1.3491	0	0	0	0	0
C37H5.14	chrV	4832000	4834566	-	No	-0.479165	135	296	539	No	ARM	697	310	24.828	0.369635	0.279755	2.03227	1.44532	3.06169	2.15294	0	0	0
C37H5.2	chrV	4847725	4849818	+	No	-0.295735	0	0	499	No	ARM	472	472	55.0678	2.23469	6.73314	3.15563	4.47776	0.982256	0.2276	6.57	0	60.3254
C37H5.3	chrV	4844670	4846941	+	No	-0.342328	0	0	112	No	ARM	509	509	53.9672	7.54624	21.0023	6.81663	8.82012	10.799	35.4682	1.38	0	123.994
C37H5.4	chrV	4842821	4843831	+	No	-0.275438	0	0	61	No	ARM	203	203	26.6782	0	0	0	0	0	0	0	0	0
C37H5.5	chrV	4827343	4836007	+	No	-0.429296	861	386	2335	No	ARM	3746	250	160.01	28.3089	37.0044	46.5501	51.7371	105.267	30.2747	1.12	0	4.06538
C37H5.6	chrV	4814545	4823330	-	No	-0.513337	969	157	2005	No	ARM	1219	698	106.226	33.9314	55.4839	49.2447	58.6185	277.595	64.3758	38.5	11.43	635.486
C37H5.8	chrV	4823917	4826746	-	No	-0.204985	0	0	0	YES	ARM	67	67	42.597	51.9742	203.872	201.413	170.497	907.146	265.491	52.15	8.34	594.664
C37H5.9	chrV	4836013	4839996	-	No	-0.597268	316	44	1104	No	ARM	1317	183	49.4718	0	16.3173	23.7887	17.6479	0.67008	0.375793	0	0	25.4113
C38C3.1	chrV	1506294	1508096	+	No	-0.350708	0	0	302	No	ARM	665	665	19.8932	0	0	0	0	0	0	0	0	0
C38C3.10	chrV	1494794	1495453	+	No	-0.221532	0	0	86	No	ARM	47	47	3.61702	1.02091	20.746	12.3281	3.88182	0.0843647	0.0191587	0	0	10.0087
C38C3.2	chrV	1499439	1500687	+	No	-0.249825	0	0	0	No	ARM	57	57	29.2456	0.826258	0.353218	1.50566	0	0	0	0	0	0
C38C3.3	chrV	1496172	1497942	+	No	-0.400268	0	45	278	No	ARM	332	269	31.9623	0	0	1.5671	9.0689	0.983281	74.4001	0	0	3.36732
C38C3.4	chrV	1482043	1483053	+	No	-0.410349	0	0	11	No	ARM	149	149	39.1915	0.993418	3.64226	3.05808	3.75206	1.69742	0.500368	0	3.75	46.3733
C38C3.5	chrV	1474785	1479582	+	No	-0.550724	209	716	898	No	ARM	3158	370	123.216	156.745	141.85	151.192	118.189	796.279	188.087	999.01	23	822.367
C38C3.6	chrV	1485034	1485658	-	No	-0.211817	0	0	0	No	ARM	164	164	24.9573	1.04497	6.21633	4.0967	0	0	0.00985317	0	0	1.82177
C38C3.7	chrV	1501419	1504299	-	No	-0.321997	0	0	0	No	ARM	324	324	13.9592	0	0	0	0	0.0344448	12.8909	0	0	0
C38C3.8	chrV	1503995	1505338	-	No	-0.268607	0	42	0	No	ARM	377	377	44.7826	0	0	0.652112	0	0.0227629	13.4916	0	0	0
C38C3.9	chrV	1509939	1511630	-	No	-0.473947	0	0	67	No	ARM	190	190	25.1724	2.17203	0.680521	0.326201	0	0.0521425	0.00178343	0	0	0
C38C6.2	chrII	14640020	14644010	-	No	-0.372776	0	0	125	No	ARM	689	689	13.212	20.0502	33.5616	26.2236	18.2512	5.86919	2.89118	0	0	124.58
C38C6.3	chrII	14633108	14634584	+	No	-0.280354	0	0	138	No	ARM	347	48	18.7666	14.2128	1.93595	3.22844	0.97475	0.0590058	0	0	0	0
C38C6.4	chrII	14634580	14636762	-	No	-0.47436	0	0	0	No	ARM	782	175	18	1.41924	0.807174	0.384051	0.384051	0.0383757	0.00986238	0	0	0
C38C6.5	chrII	14630477	14632561	-	No	-0.367968	0	0	0	No	ARM	217	217	18.5417	0	0.345758	0	0	0.0299444	9.16743	0	0	0
C38C6.6	chrII	14627552	14630047	+	No	-0.296845	0	0	121	No	ARM	297	297	15.1481	44.8053	67.2078	54.1812	10.4292	0.311692	0.0371118	0	0	0.195374
C38D9.1	chrV	17563144	17565977	-	No	-0.69744	645	0	0	No	ARM	1197	1197	27.4218	0.882321	0	0	0.392679	0	0.0206184	0	0	0.299067
C38D9.10	chrV	17553843	17555749	+	No	-0.569095	196	0	500	No	ARM	646	273	33.0186	0	0	0	0	0	0	0	0	0
C38D9.11	chrV	17562194	17563089	+	No	-0.196288	0	0	0	No	ARM	52	52	5	0	1.20339	0	0	0	0.0046789	3.84	0	0
C38D9.12	chrV	17547356	17549262	+	No	-0.439365	0	181	0	No	ARM	666	666	12.551	0.495509	2.60932	1.59543	0.426724	0.350405	0.0689472	3.64	0	0
C38D9.2	chrV	17566412	17571577	+	No	-0.318094	0	221	0	No	ARM	1917	1917	85.9781	1.21076	0.853917	0.46725	0.591305	0.471991	6.35366	0	0	0.119238
C38D9.4	chrV	17584766	17585850	+	No	-0.269826	0	0	391	No	ARM	46	46	11.3478	0	0	0	0	0	0.0129582	0	0	0
C38D9.5	chrV	17586825	17591949	+	No	-0.881084	344	0	258	No	ARM	464	406	9.99091	0	0	0.227773	0.227773	0.0273319	6.04287	0	0	0.5112
C38D9.6	chrV	17559477	17561586	+	No	-0.296559	0	0	0	No	ARM	286	286	7.3007	0	0.567544	0.369785	0.320586	0	0	0	0	0
C38D9.7	chrV	17555827	17558451	-	No	-0.725694	671	0	302	No	ARM	1178	1178	45.2229	0	0	0	0.404286	0	0	0	0	0
C38D9.8	chrV	17551479	17552790	-	No	-0.473818	0	123	0	No	ARM	220	220	7.15455	8.99904	0	0	1.90307	0.0143328	0	0	0	0
C38D9.9	chrV	17549648	17551170	+	No	-0.445955	0	0	0	No	ARM	337	337	24.1667	0	0.735404	0.526892	0	0.0166449	0.0087162	0	0	0
C38H2.1	chrIII	10365001	10373138	+	No	-0.464222	0	147	726	No	ARM	1741	162	48.2672	1.75778	4.33338	1.54765	1.85292	1.04201	0.647803	0	0	204.563
C38H2.2	chrIII	10381678	10385242	+	No	-0.342258	73	61	585	No	ARM	628	628	30.8484	26.2064	30.9564	21.2598	6.9827	1.64374	18.5614	18.79	0	61.793
C38H2.3	chrIII	10385212	10386478	-	No	-0.310218	0	0	383	No	ARM	382	174	16.7356	0.879993	4.50927	1.38853	2.49335	0.969946	0.426278	0	0	28.4498
C39B5.1	chrIII	2240760	2243833	+	No	-0.604224	1208	0	356	No	ARM	1098	760	53.0789	0.847791	0.680712	0	0	0	0	0	0	0
C39B5.10	chrIII	2238956	2240162	-	No	-0.334611	0	0	300	No	ARM	421	108	27.3148	0.725083	0	0	0	0	0	0	0	0
C39B5.11	chrIII	2244154	2245817	-	No	-0.45935	0	250	550	No	ARM	332	223	27	0	0	0	0.655312	0	0.0102339	0	0	0
C39B5.12	chrIII	2222427	2223990	-	No	-0.482728	190	0	290	No	ARM	353	353	41.0765	0	0	0	0	0.0123079	0	0	0	0
C39B5.14	chrIII	2211409	2217085	+	No	-0.473648	1699	1524	1483	No	ARM	2445	631	72.5353	0.57905	0	0.387269	0.456367	0.043203	0.0176679	0	0	0
C39B5.2	chrIII	2233877	2236976	+	No	-0.376291	0	120	1182	No	ARM	904	364	31.792	128.839	1.33601	0.753077	5.97783	3.99696	0	0	0	0
C39B5.3	chrIII	2227696	2229218	+	No	-0.38705	0	45	439	No	ARM	544	544	32.6857	0	2.30384	1.81998	0.906613	0.171279	0.0381871	0	0	0
C39B5.4	chrIII	2224662	2227189	+	No	-0.342023	0	537	1374	No	ARM	732	732	74.5328	1.55128	10.0706	3.49609	1.6875	0.202605	0.10417	0	0	2.36848
C39B5.5	chrIII	2208259	2211286	+	No	-0.415619	504	1095	1368	No	ARM	1551	1551	138	0	1.64942	89.3072	172.28	6.48354	2.19224	0	0	0
C39B5.6	chrIII	2197995	2206872	+	No	-0.412779	990	3144	2221	No	ARM	2394	1872	401.408	20.6594	22.972	26.444	24.1559	42.6788	10.1542	0	0	8.44768
C39B5.7	chrIII	2219696	2222355	+	No	-0.382555	274	564	532	No	ARM	969	969	88.1851	0	1.34575	0.587981	0	0.146069	0.00748471	0	0	0
C39B5.8	chrIII	2217193	2219716	-	No	-0.399243	103	934	238	No	ARM	1168	239	53.5374	0	0.752365	3.51696	0	0	0.00372746	0	0	0
C39B5.9	chrIII	2229981	2232450	-	No	-0.358306	104	0	320	No	ARM	752	549	59.2593	1.5887	0	0	0	0.143849	0.0497651	0	0	0
C39E9.1	chrIV	13061749	13063181	+	No	-0.297698	0	37	979	No	ARM	507	242	49.6942	0	0	0	0	0	0	0	0	0
C39E9.10	chrIV	13086980	13089594	+	No	-0.351444	0	0	79	YES	ARM	583	583	17.7341	6.64276	8.44529	2.17135	3.3351	0.25601	0.0306359	0	0	2.28379
C39E9.11	chrIV	13091159	13093820	-	YES	-0.508365	391	109	0	No	ARM	732	732	100.564	44.3268	16.0415	24.588	34.8032	195.121	48.3772	7.13	0	2.10259
C39E9.12	chrIV	13093980	13095467	+	No	-0.218864	0	0	155	No	ARM	49	44	7.13636	27.4274	4.39838	6.85194	16.3522	180.04	25.305	0	0	0.240626
C39E9.13	chrIV	13095735	13096977	+	No	-0.233672	0	0	0	No	ARM	61	61	8.7541	59.7004	11.586	20.2121	45.9483	330.561	49.4269	3.94	1.25	5.01286
C39E9.14	chrIV	13096958	13098789	-	No	-0.284918	0	0	75	YES	ARM	50	49	26.52	30.8824	32.8623	31.9988	27.0346	96.971	24.2706	7.99	0	122.832
C39E9.2	chrIV	13063979	13065134	+	No	-0.33212	0	0	0	No	ARM	359	359	8.61281	0	1.25793	2.62854	0	0.152311	0.20905	0	0	71.8512
C39E9.3	chrIV	13065704	13067264	-	No	-0.303406	0	0	52	YES	ARM	498	498	23.1044	46.5534	25.7046	6.96281	2.18611	0	0	0	0	0
C39E9.4	chrIV	13068743	13070266	+	No	-0.324581	0	0	0	No	ARM	351	351	29.9761	1.13845	3.97832	2.63245	0.853043	0.161143	0.330919	0	0	7.2472
C39E9.5	chrIV	13070454	13071246	+	No	-0.262273	0	0	0	No	ARM	58	55	13.4182	0	0	0	0	0	0	0	0	0
C39E9.6	chrIV	13071729	13072454	+	No	-0.247727	0	0	37	No	ARM	48	44	2.04545	0	0	0	0	0	0	0	0	0
C39E9.7	chrIV	13072635	13076716	-	No	-0.426839	0	0	99	No	ARM	931	192	47.2317	0	14.0968	2.88614	3.2763	0.106943	0.0587608	0	0	5.31449
C39E9.8	chrIV	13079455	13082758	+	No	-0.328988	0	0	52	No	ARM	1175	1076	28.9546	7.0573	154.22	157.412	99.4355	7.71926	2.33635	0	0	63.0937
C39E9.9	chrIV	13089553	13091043	-	No	-0.360168	0	0	0	No	ARM	594	594	37.7189	1.01338	0	0	0.549576	0.386541	0.08063	0	0	0
C39F7.1	chrV	1260109	1262588	+	No	-0.430661	196	0	662	No	ARM	1244	1244	30.7315	2.17681	5.31901	3.41686	1.09427	0.884897	0.493659	0	0	99.8261
C39F7.2	chrV	1223897	1235446	-	No	-0.469152	814	208	1794	No	ARM	5530	356	26.8156	52.5257	23.2097	14.9873	8.88737	0.986854	0.0792123	0	0	101.652
C39F7.4	chrV	1262620	1263992	-	No	-0.313691	1934	3168	0	YES	ARM	55	55	42.3333	306.296	201.816	203.349	190.261	317.694	136.837	427.71	26.47	4260.03
C39F7.5	chrV	1264773	1270105	+	YES	-0.628941	1074	61	2067	No	ARM	1232	1232	27.5833	8.29693	6.44316	4.37683	2.95055	4.79964	3.41596	1.16	0	37.504
C40A11.1	chrII	2154016	2155225	+	No	-0.280439	0	0	0	No	ARM	114	114	14.1509	2.20689	9.38831	11.9221	6.16231	0.0693874	0.109021	1.44	0	0
C40A11.10	chrII	2136536	2137305	-	No	-0.303826	0	0	0	No	ARM	316	316	21.5538	94.7481	4.31558	0	4.01923	0.732187	0.223198	0	0	3.01311
C40A11.2	chrII	2146954	2148780	+	No	-0.422713	0	365	498	No	ARM	764	764	39.4286	61.8689	0.69866	0.571316	3.00972	0.380795	0	0	0	0
C40A11.3	chrII	2141134	2143046	+	YES	-0.404805	120	0	282	No	ARM	563	563	15.1489	58.9352	2.85378	0	2.97636	0.0236976	0	0	0	106.233
C40A11.4	chrII	2137329	2138995	+	No	-0.34519	111	0	449	No	ARM	683	683	41.1391	24.9575	0.947151	0	0.588315	0.221371	0.0488821	0	0	0
C40A11.5	chrII	2133670	2135709	-	No	-0.395673	185	76	125	No	ARM	1038	1038	41.0833	0	0	0	0.573916	0	0	0	0	0
C40A11.6	chrII	2144296	2145587	-	No	-0.304275	0	0	159	No	ARM	262	262	31.0577	35.6599	0.440775	0	0.595429	0.0501732	0	0	0	0
C40A11.7	chrII	2148810	2150315	-	No	-0.368509	111	0	0	No	ARM	514	173	55.642	10.6662	1.31485	0	1.48543	0.0422712	0.0418551	0	0	0
C40D2.1	chrII	1998865	1999663	+	No	-0.196929	0	0	6	No	ARM	84	42	31.4762	0	1.26438	0	0	0	0	0	0	0
C40D2.2	chrII	1996534	1998535	+	No	-0.272254	0	0	0	No	ARM	63	63	17.0698	6.75822	19.6357	18.2124	10.9657	0.117761	0.0479981	17.89	0	0
C40D2.3	chrII	1994051	1995661	+	No	-0.247163	0	0	0	No	ARM	76	49	54.3265	4.04462	1.03995	1.05861	0.371357	0.0557035	0.049744	0	0	0
C40D2.4	chrII	1999747	2000825	-	No	-0.266704	0	76	0	No	ARM	250	250	49.0577	0	0	0	0	0	0	0	0	0
C41D11.1	chrI	4463854	4466922	+	No	-0.413227	55	105	60	No	ARM	4807	247	78.748	5.27981	6.95494	5.5457	7.10835	7.12626	2.40621	0	0	3.86774
C41D11.10	chrI	4427024	4428027	+	No	-0.326998	0	0	190	No	ARM	464	464	18.1315	0	0	0	0	0	0	0	0	0
C41D11.2	chrI	4444719	4446594	+	No	-0.245355	0	0	329	No	ARM	242	242	26.6531	57.6914	90.6682	88.8276	88.0807	223.554	89.1254	4.34	0	26.9173
C41D11.3	chrI	4428456	4444105	-	No	-0.525857	489	541	1299	No	ARM	8621	692	179.459	29.7917	17.6128	8.78685	19.0242	61.9769	16.2022	3.77	0	15.4409
C41D11.4	chrI	4441646	4444342	-	No	-0.189349	0	0	44	No	ARM	129	129	26.2857	31.7027	14.4114	8.11816	19.7275	40.2728	3.71214	1.1	0	53.8129
C41D11.5	chrI	4449834	4450926	-	No	-0.263361	0	0	196	No	ARM	61	61	22.7391	93.2409	8.61711	24.5996	44.5641	151.361	13.6861	2.65	0	0
C41D11.7	chrI	4451197	4456806	-	No	-0.599831	339	0	662	No	ARM	928	378	133.096	24.0623	5.11202	7.47421	16.3167	40.0784	4.38144	0	0	0.185779
C41D11.8	chrI	4446582	4448464	-	No	-0.340295	0	0	69	No	ARM	509	509	66.9294	6.19781	36.4794	44.9795	38.1574	100.829	34.0613	77.86	0	39.3775
C41D11.9	chrI	4448577	4449777	-	No	-0.331808	0	0	164	No	ARM	390	390	67.2821	72.997	12.7935	18.3547	36.1879	49.3211	6.19263	0	0	10.0614
C41D7.1	chrII	356608	357458	-	No	-0.276504	0	0	239	No	ARM	373	373	68.9075	0	0	0	0	0	0	0	0	0
C41D7.2	chrII	362493	367555	-	No	-0.328309	0	48	161	No	ARM	777	501	79.2727	3.20256	12.9273	6.31484	4.59628	0.576196	0.0173847	0	0	2.39487
C41H7.1	chrII	3016070	3017474	+	No	-0.259546	0	0	157	No	ARM	240	240	18.6222	0.829742	2.3154	2.96993	0.55083	0.366366	0.0432685	0	0	0
C41H7.2	chrII	3014837	3016925	+	No	-0.439476	0	0	387	No	ARM	559	275	120.218	1.12779	1.11577	1.12861	1.83984	0.193776	0.140801	3.79	0	0
C41H7.3	chrII	3005848	3007510	+	No	-0.425736	89	0	172	No	ARM	326	326	10.5652	35.601	4.72245	3.13147	8.59611	55.476	4.28645	0	0	10.2636
C41H7.4	chrII	3003984	3005600	+	No	-0.405139	0	0	0	No	ARM	299	187	2.30769	18.5279	1.40518	3.73553	4.72947	23.5501	3.19662	0	0	59.6345
C41H7.5	chrII	3002520	3003803	+	No	-0.276571	0	0	0	No	ARM	105	105	13.2157	2.31888	2.12383	0.370775	1.13386	6.67174	0.762079	0	0	109.698
C41H7.6	chrII	3000827	3002414	+	No	-0.240235	0	0	0	No	ARM	383	51	15.098	76.1673	8.99121	6.16513	15.3123	78.3978	4.54599	1.06	0	101.345
C41H7.7	chrII	3017474	3019790	-	No	-0.420132	0	452	636	No	ARM	931	931	17.1579	0	1.469	0	0.995217	0	0.013141	0	0	0
C41H7.8	chrII	3009184	3011575	+	YES	-0.354794	0	0	0	No	ARM	1299	1299	13.679	33.1721	1.52428	0	4.50934	0.0433855	0	0	0	0.470532
C43D7.10	chrV	19308677	19309658	-	No	-0.17217	0	0	0	No	ARM	94	94	13.1333	4.54915	0	0	0.584822	0.0114556	0	0	0	0
C43D7.11	chrV	19311833	19312788	+	No	-0.212405	0	0	0	No	ARM	74	74	33.3243	7.7019	0	0	0.558933	0	0	0	0	0
C43D7.2	chrV	19329610	19330644	+	No	-0.150745	0	0	50	No	ARM	47	47	3.40426	8.70908	0.77393	0	0	0.11238	0.00386592	0	0	0
C43D7.4	chrV	19321871	19322458	-	No	-0.253932	122	0	0	No	ARM	63	59	3.80952	1.03577	1.09081	0	0	0	0	0	0	0
C43D7.5	chrV	19320594	19321174	+	No	-0.24005	121	0	82	No	ARM	61	60	3.5	3.83591	0	0.910378	0	0.171904	0.26996	0	0	0
C43D7.6	chrV	19317332	19318471	+	No	-0.396716	0	0	46	No	ARM	67	67	18.8364	0	0	0	0	0	0.00350434	0	0	0
C43D7.7	chrV	19319003	19319431	-	No	-0.199367	0	0	0	No	ARM	128	128	25.2656	0	0	0	0	0.189318	0.128858	0	0	0
C43D7.8	chrV	19310553	19311029	-	No	-0.278261	0	0	0	No	ARM	46	46	3.18182	19.3487	0	0	1.2757	0	0	0	0	0
C43D7.9	chrV	19313245	19316483	+	No	-0.355879	0	41	170	No	ARM	2340	2340	9.56538	0.5775	0	0	0	0.0299807	0	0	0	0
C43E11.1	chrI	4270646	4273336	+	No	-0.2474	0	0	0	No	ARM	54	50	30.0769	64.1968	26.566	24.2085	39.5685	102.976	28.4009	1.24	0	39.9915
C43E11.10	chrI	4268069	4270288	-	No	-0.337027	0	0	0	YES	ARM	297	297	54.1178	32.6177	13.2143	14.9616	23.9212	165.535	19.7113	4.81	0	7.2827
C43E11.11	chrI	4249482	4253170	+	No	-0.350891	0	64	91	No	ARM	754	469	136.977	30.6171	14.6279	15.5152	23.1504	112.817	41.9504	13.66	0	9.45325
C43E11.12	chrI	4253242	4254140	+	No	-0.288008	0	0	0	No	ARM	241	241	29.9375	33.2139	12.4363	10.7655	21.4322	146.743	44.9035	3.02	0	44.9639
C43E11.2	chrI	4265107	4267187	+	No	-0.321847	0	0	0	No	ARM	567	567	52	10.2011	7.98455	13.0967	19.621	85.5355	26.7387	13.95	0	8.5794
C43E11.3	chrI	4254380	4264692	+	YES	-0.530184	693	55	0	YES	ARM	884	637	148.929	38.1765	19.0572	16.7517	25.8396	46.1426	8.1359	2.69	1.89	49.0547
C43E11.4	chrI	4247754	4249384	+	No	-0.249873	0	0	0	YES	ARM	134	134	34.8657	12.5282	31.9874	43.7922	35.2046	198.793	52.208	1.13	0	2.89474
C43E11.5	chrI	4237034	4238739	+	No	-0.445359	0	0	300	No	ARM	276	276	36.7458	0.947286	0	3.23974	3.25346	0.0337026	6.94446	0	0	4.31449
C43E11.6	chrI	4229577	4236044	+	No	-0.338929	0	0	421	No	ARM	2212	756	53.9943	182.44	28.2565	12.9013	6.09976	1.87323	0.413262	0	1.6	351.074
C43E11.7	chrI	4239087	4242730	-	No	-0.345647	55	95	434	No	ARM	1897	1897	40.1039	7.79571	11.6613	14.1477	18.8795	50.5738	14.1437	0	0	9.24586
C43E11.8	chrI	4242819	4247581	-	No	-0.341615	0	104	246	YES	ARM	906	467	140.258	27.5374	20.8532	23.6702	28.4272	74.7543	10.3834	2.49	0	13.0127
C43E11.9	chrI	4266928	4267972	-	No	-0.157913	0	0	0	No	ARM	49	46	17.7143	39.7856	44.3141	51.7038	47.6267	121.445	61.2669	4.39	0	3.31089
C43H6.1	chrX	2409682	2412959	+	No	-0.330078	0	52	281	No	ARM	731	731	72.643	10.0055	11.4231	11.5986	12.6975	2.56131	0.455973	2.52	0	32.7376
C43H6.3	chrX	2407457	2409560	+	No	-0.407184	240	0	831	No	ARM	1304	49	39.862	91.4826	49.8147	33.3469	31.3201	17.6285	1.31173	6.08	2.39	28.9747
C43H6.4	chrX	2404014	2407353	+	No	-0.283826	0	0	432	No	ARM	305	305	34.2287	38.377	8.92338	5.5064	4.47586	3.92604	0.0726379	0	0	14.6057
C43H6.6	chrX	2395497	2398819	+	No	-0.381878	40	0	297	No	ARM	711	711	63.8049	4.0329	2.19589	0.573838	0	0	0	0	0	0.170958
C43H6.7	chrX	2398790	2402044	-	No	-0.365497	0	0	737	No	ARM	941	941	43.4601	19.5341	7.01035	11.3748	5.93676	3.31749	0.33874	0	0	7.78087
C43H6.8	chrX	2412961	2413281	-	No	-0.15928	0	0	0	No	ARM	50	50	10.24	4.62811	6.16486	1.54764	0	0	0	0	0	0
C43H6.9	chrX	2413901	2417885	-	No	-0.375982	0	0	262	No	ARM	746	492	53.8246	0.188317	0.609088	0	0.435	0.104116	0.0156528	0	0	11.9197
C44B11.1	chrIII	3155259	3158385	+	No	-0.505759	394	85	579	No	ARM	1176	547	29.521	5.33334	0.595623	0.682783	0	0	0	0	0	0
C44B11.3	chrIII	3131565	3139213	-	No	-0.414272	912	0	2730	No	ARM	2401	2401	55.0343	10.0458	48.2589	23.7384	8.91872	0.479225	0.330723	3.32	1.2	167.737
C44B11.4	chrIII	3142213	3143751	-	No	-0.389303	98	46	0	No	ARM	630	528	67.1175	0	13.5563	4.77738	2.18303	0.170179	0.0611996	1.08	0	63.3077
C44B11.6	chrIII	3152727	3153464	+	No	-0.243448	0	0	137	No	ARM	299	299	18.3679	19.5859	60.5419	83.7679	69.8496	12.302	1.46812	15.88	8.19	8.57184
C44B12.1	chrIV	1126790	1128856	+	No	-0.432724	0	0	156	YES	ARM	834	410	39.6854	0.8606	0	155.411	571.322	842.874	355.981	1.06	0	0
C44B12.2	chrIV	1107395	1110860	+	No	-0.356819	0	0	749	YES	ARM	1179	474	126.684	326.847	440.203	331.502	209.219	54.7178	47.0456	12.9	4.77	352.013
C44B12.3	chrIV	1104772	1105273	+	No	-0.135455	0	0	0	No	ARM	55	55	19.2	0	2.01722	0	0	2.73173	0.276682	0	0	0
C44B12.4	chrIV	1114968	1118666	-	No	-0.35578	349	209	582	No	ARM	790	567	100.192	0	0	0	0	0.0337647	0.143426	0	0	0
C44B12.5	chrIV	1121456	1125283	-	No	-0.328725	192	30	1306	YES	ARM	1291	1160	112.864	0	0	35.5342	172.105	1339.51	618.927	2.12	2.63	0
C44B12.6	chrIV	1129130	1132683	-	No	-0.362613	0	421	543	No	ARM	1871	1871	65.2905	0.782292	0.668846	0	0	1.36255	0.620853	0	0	0.644471
C44B12.8	chrIV	1111461	1114820	-	No	-0.358643	230	0	511	No	ARM	1557	1557	40.6962	0	0.828386	1.02692	0.433412	0	0	0	0	0
C44B12.9	chrIV	1103540	1104609	-	No	-0.408895	0	0	226	No	ARM	772	772	4.52591	1.43552	0	0	0	0.245451	0.119838	0	0	0
C44B9.1	chrIII	10869093	10874541	+	No	-0.442981	0	840	847	No	ARM	1075	1075	96.3467	7.77616	3.32916	3.23175	1.69996	8.5906	0.80115	0	0	43.6198
C44B9.2	chrIII	10875359	10877915	+	No	-0.415967	0	0	387	No	ARM	764	764	67.9145	1.78269	0	3.13529	2.00824	1.4509	90.7335	0	0	0
C44B9.3	chrIII	10878091	10880086	-	No	-0.293316	0	0	552	No	ARM	418	418	118.092	76.8266	2.27073	2.80606	14.2584	81.4503	5.32331	0	1.49	0
C44B9.4	chrIII	10882245	10893575	+	No	-0.529263	566	1342	3705	No	ARM	1076	685	294.751	26.9591	7.33425	10.4494	18.3607	59.4535	9.17645	0	0	10.6418
C44B9.5	chrIII	10896288	10901739	+	No	-0.373974	0	172	1138	No	ARM	972	505	231.604	16.1433	5.71693	4.49581	13.4843	67.7044	18.1226	0	0	6.41896
C44B9.6	chrIII	10894420	10895633	+	No	-0.269651	0	0	78	No	ARM	63	63	3.65079	14.2512	0	0	1.71276	0.275537	0.0249981	0	0	0
C44C1.1	chrX	980772	983026	+	No	-0.313811	0	0	0	No	ARM	729	444	35.2075	131.627	44.4411	55.6376	46.1738	6.14902	7.61796	0	0	0.362254
C44C1.2	chrX	957882	960564	+	No	-0.39312	56	0	77	No	ARM	701	701	19	24.7815	15.4314	9.2511	11.8242	13.1036	1.75385	2.91	0	18.6653
C44C1.3	chrX	960561	963199	-	No	-0.315779	0	0	0	No	ARM	946	946	44.5497	6.25215	10.7803	4.56695	1.23445	0	0	0	0	5.41323
C44C1.4	chrX	970591	974786	-	No	-0.347266	52	0	229	No	ARM	920	920	44.335	19.075	14.7849	7.91934	7.80897	7.86743	0.327165	2.55	0	19.9119
C44C1.5	chrX	975522	978442	-	No	-0.331507	0	0	1340	No	ARM	440	288	25	0.507537	22.5052	44.6172	27.0331	1.3377	1.23417	6.64	0	0
C44C1.6	chrX	969069	970267	-	No	-0.346869	0	0	0	No	ARM	659	659	11.5129	0	13.0858	5.97239	3.36622	0.316693	0.146033	0	0	146.587
C44C11.1	chrII	12344725	12352395	-	No	-0.476523	0	144	791	No	ARM	2440	266	26.784	8.82568	16.6163	8.213	5.28553	0.789416	1.27927	53.37	2.14	1555.86
C44C3.1	chrV	2976584	2977844	+	No	-0.235625	0	0	0	No	ARM	56	56	68.6786	0	0	0	0	0	0.00412223	0	0	0
C44C3.10	chrV	2965419	2966700	-	No	-0.236327	0	0	0	No	ARM	49	49	32.7755	0	0	0	0	0	0	0	0	0
C44C3.11	chrV	2974026	2975383	-	No	-0.373852	0	0	53	No	ARM	122	122	27.2273	0	0	0	0	0	0	0	0	0
C44C3.2	chrV	2971946	2973483	+	No	-0.258011	0	84	0	No	ARM	280	280	40.05	0	0	0	0	0	0	0	0	0
C44C3.3	chrV	2961679	2963058	-	No	-0.309804	0	0	0	No	ARM	163	163	46.7544	0	0	0	0	0	0	0	0	0
C44C3.4	chrV	2969346	2971162	-	No	-0.354145	0	0	0	No	ARM	664	664	33.619	0.40374	0.34519	0	0	0	0	0	0	0
C44C3.5	chrV	2978757	2980076	-	No	-0.320818	0	0	0	No	ARM	49	44	29.2381	0	0	0	0	0	0	0	0	0
C44C3.6	chrV	2982149	2983449	-	No	-0.283521	0	0	0	No	ARM	48	48	38.4375	0	0	0	0	0	0	0	0	0
C44C3.7	chrV	2984074	2985407	-	No	-0.231109	0	0	0	No	ARM	57	46	39.3684	0	0	0	0	0	0	0	0	0
C44C3.8	chrV	2986189	2987676	-	No	-0.30156	431	0	0	No	ARM	361	361	48.7727	0	0	0	0	0	0	0	0	0
C44C3.9	chrV	2963563	2964884	-	No	-0.383711	0	0	111	No	ARM	170	45	75.9778	0	0	0	0	0	0	0	0	0
C44C8.1	chrIV	903695	905071	+	No	-0.34314	0	0	0	No	ARM	205	43	41.7463	0	0	0	0	0	0	8.16	0	0
C44C8.10	chrIV	892805	894586	+	No	-0.323604	0	0	0	No	ARM	275	275	8.73455	0.442176	0	0	0	0	0	0	0	0
C44C8.2	chrIV	899542	900918	+	No	-0.34314	0	0	0	No	ARM	205	43	41.7463	0	0	0	0	0	0	8.31	1.43	0
C44C8.3	chrIV	895390	896766	+	No	-0.34314	0	0	0	No	ARM	205	43	41.7463	0	0	0	0	0	0	8.67	0	0
C44C8.4	chrIV	891238	892614	+	No	-0.34314	0	0	0	No	ARM	205	43	41.7463	0	0	0	0	0	0	6.94	0	0
C44C8.6	chrIV	884908	890187	+	No	-0.355361	246	114	1418	No	ARM	1074	675	101.28	31.8001	18.8076	23.2414	8.66412	12.7511	0.863117	23.99	2.57	127.765
C44C8.7	chrIV	905262	906048	+	No	-0.152978	0	0	0	No	ARM	45	45	5.68889	0	0	0	0	0	0	0	0	0
C44C8.8	chrIV	901109	902891	+	No	-0.322087	0	0	0	No	ARM	276	276	8.31884	0	0	0	0	0	0	0	0	0
C44C8.9	chrIV	896957	898739	+	No	-0.322087	0	0	0	No	ARM	276	276	8.31884	0	0	0	0	0	0	0	0	0
C44F1.1	chrIII	3760570	3765538	-	No	-0.396882	0	101	195	No	ARM	1198	119	26.9552	8.53881	3.52268	3.2134	0.504841	0.232432	0.098697	1.24	0	0
C44F1.2	chrIII	3768524	3770306	+	No	-0.37516	0	0	0	No	ARM	215	181	22	0	0	0.814082	0	0.123345	32.3242	0	0	0
C44F1.3	chrIII	3771402	3773315	-	No	-0.357347	0	0	0	No	ARM	499	144	38.2285	11.6437	100.718	115.261	64.5356	5.53955	2.34111	1.62	1.41	23.8047
C44F1.5	chrIII	3774870	3786718	-	No	-0.354506	26	215	1671	No	ARM	3888	3888	65.9572	14.127	20.4417	8.3622	2.72212	0.230111	0.117565	1.64	0	11.637
C44H4.1	chrX	14572648	14576037	+	No	-0.381584	0	160	0	No	ARM	652	652	31.1085	16.2699	2.54646	0.992803	0.643433	0.0316599	0	0	0	0.438056
C44H4.2	chrX	14577883	14580846	+	No	-0.25302	0	0	0	No	ARM	75	50	12.1724	62.2098	5.7426	14.8088	2.42782	0.544565	0	0	0	1.90454
C44H4.3	chrX	14581584	14584299	+	No	-0.238804	0	0	240	No	ARM	69	51	18.1569	195.651	41.6539	78.3515	9.69848	0.42625	0.0237855	0	0	1.32132
C44H4.4	chrX	14568786	14589018	-	No	-0.346655	0	249	1061	No	ARM	676	519	45.2978	34.3366	13.238	11.3343	11.4683	6.27772	0.382238	0	0	9.66184
C44H4.5	chrX	14589566	14591894	+	No	-0.336833	0	38	0	No	ARM	360	138	30.65	29.7839	27.5853	17.0394	13.7839	2.56073	0.403566	11.94	0	24.0298
C44H4.6	chrX	14596337	14599090	-	No	-0.365088	122	49	290	YES	ARM	978	978	33.1159	6.1151	2.0388	2.28853	0.353301	0.0312092	0.00652033	0	0	3.62734
C44H4.7	chrX	14602996	14608590	+	No	-0.361173	0	356	661	No	ARM	889	202	19.395	32.4351	10.4083	4.79673	5.99934	7.93795	0.112754	4.02	0	31.1971
C44H4.8	chrX	14595055	14596267	+	No	-0.16388	0	0	0	No	ARM	59	50	6.76	0.823195	2.88878	0	0	0.16209	0.00373297	0	0	40.9651
C45E1.1	chrI	3104364	3109544	+	No	-0.439905	473	275	2269	No	ARM	3005	1285	55.0018	9.07763	4.28731	3.84253	3.72897	1.78364	0.918974	5.77	0	7.67713
C45E1.4	chrI	3115037	3125147	-	No	-0.451995	516	667	4118	No	ARM	7482	840	27.6716	2.40069	9.88285	7.36451	3.30912	0.415239	0.181962	1.15	0	161.916
C45E1.5	chrI	3109649	3110674	-	No	-0.30386	0	0	268	No	ARM	551	551	23.1125	0	2.79406	0	4.0957	0.269975	0.208219	0	0	0
C45G7.1	chrIV	2470341	2471448	+	No	-0.393764	128	277	233	No	ARM	454	454	74.2167	0	0	0	0	0	0	0	0	0
C45G7.2	chrIV	2467679	2468878	+	No	-0.305905	0	0	260	No	ARM	528	528	6.36765	0	1.49088	0.854526	0	0.315858	0.0615613	24.6	0	0
C45G7.3	chrIV	2464469	2465439	+	No	-0.368111	0	97	285	No	ARM	404	404	8.56931	0	0	5.55663	4.8278	0.064629	0.0199914	53.43	1.36	0
C45G7.4	chrIV	2432991	2436430	+	No	-0.395165	70	613	1511	No	ARM	738	728	31.0435	10.6465	2.88897	0.825634	1.83153	2.01817	0.0362852	0	0	2.29006
C45G7.5	chrIV	2436513	2463368	-	No	-0.426111	552	1594	5794	No	ARM	909	341	81.7676	0.957676	4.89482	11.948	0.675745	0.151723	0.0249509	0	0	1.60414
C45H4.1	chrV	2182036	2183190	+	No	-0.308951	0	0	0	No	ARM	122	122	48	0	0	0	0	0	0	0	0	0
C45H4.10	chrV	2151760	2153009	+	No	-0.538913	0	0	0	No	ARM	138	138	31.0385	0.465955	0	0	0	0	0.0344845	0	0	0
C45H4.11	chrV	2147093	2148625	+	No	-0.445375	0	0	230	No	ARM	328	328	68.9396	0	0	0	0	0	0	0	0	0
C45H4.12	chrV	2144018	2146143	-	No	-0.417541	94	0	408	No	ARM	994	994	41.7778	0	0	0	0.622738	0	0	0	0	0
C45H4.13	chrV	2148655	2150975	-	No	-0.414822	102	0	288	No	ARM	931	931	42.9434	0.383467	0	0	0	0	0	0	0	0
C45H4.14	chrV	2158672	2159417	-	No	-0.147197	0	0	0	No	ARM	76	76	49.0789	18.8012	0	0	2.94421	48.1854	0.0681971	0	0	0
C45H4.15	chrV	2161498	2163834	-	No	-0.439182	130	0	814	No	ARM	572	236	38.8696	0	0	0	0	0	0	0	0	0
C45H4.16	chrV	2164824	2166778	-	No	-0.454526	0	379	591	No	ARM	865	865	42.2708	0.68962	0	0.457809	0.457809	0	0	0	0	0
C45H4.17	chrV	2183519	2186534	+	No	-0.374717	0	290	327	No	ARM	1237	1237	13.625	0	2.09852	0.280822	0	0.0811633	0	0	0	0
C45H4.18	chrV	2175540	2177502	+	No	-0.342401	0	62	0	No	ARM	923	923	11.4908	0	0	0	0	0.0104177	0	0	0	0
C45H4.2	chrV	2179584	2181758	+	No	-0.402106	80	0	183	No	ARM	425	425	11.32	0	0	0	0	0.0330312	0.00426481	0	0	0.122987
C45H4.3	chrV	2177712	2179115	+	No	-0.401875	38	0	371	No	ARM	367	367	27.1818	0	0	0	0	0	0	0	0	0
C45H4.5	chrV	2171416	2174411	+	No	-0.372217	0	333	1642	No	ARM	1302	1302	15.5499	0	0	0	0	0	0	0	0	0
C45H4.6	chrV	2169304	2170667	+	No	-0.293229	0	153	0	No	ARM	290	48	38.2642	0	0	0	0	0	0	0	0	0
C45H4.7	chrV	2155530	2156634	+	No	-0.328889	0	0	0	No	ARM	52	45	18.0816	0	0	0	0	0	0	0	0	0
C45H4.8	chrV	2157128	2158273	+	No	-0.347353	0	0	106	No	ARM	62	51	96.1429	0	0	0	0	0	0.0150743	0	0	0
C45H4.9	chrV	2153572	2155111	+	No	-0.408902	149	0	421	No	ARM	479	479	65.0435	0	0	0	0	0	0	0	0	0
C46E1.2	chrX	15478948	15485632	+	No	-0.63119	277	329	908	No	ARM	3239	415	20.6122	1.22736	3.25719	1.1349	0.62863	0	0.00179258	0	0	1.30469
C46E1.3	chrX	15470726	15477334	-	No	-0.513723	1025	67	776	No	ARM	1760	1611	36.46	1.52352	6.79858	2.49569	1.64716	0.0407817	0.0102928	0	0	0.3408
C46E10.1	chrII	3724262	3725852	+	No	-0.401216	0	0	0	No	ARM	412	412	23.2083	0	0	3.70022	6.57691	0.141065	50.9717	0	0	0
C46E10.10	chrII	3713190	3714698	-	No	-0.421599	0	0	0	No	ARM	280	137	3.72143	0	0	0.400252	0	0	0	0	0	0
C46E10.2	chrII	3723380	3723899	+	No	-0.264293	0	0	0	No	ARM	147	147	11.7143	0	0	0	0	0	0	0	0	0
C46E10.3	chrII	3721318	3723087	+	No	-0.39864	0	0	0	No	ARM	238	100	11.8605	0	0	0	0	0	0	0	0	0
C46E10.4	chrII	3717140	3719770	+	No	-0.507408	0	41	388	No	ARM	750	265	60.616	37.9502	9.17079	4.7209	5.36865	13.7363	0.23482	2.71	0	29.6777
C46E10.5	chrII	3711295	3713051	+	No	-0.492855	0	0	0	No	ARM	211	131	78.913	2.69763	2.22477	0.610911	0	0	0	0	0	0
C46E10.6	chrII	3709557	3710955	+	No	-0.415177	0	0	0	No	ARM	147	147	24.1818	0	0	0	0	0	0	0	0	0
C46E10.7	chrII	3715002	3716558	-	No	-0.52791	0	0	0	No	ARM	342	122	24.3542	0	0	0	0	0	0	0	0	0
C46E10.8	chrII	3725846	3727462	-	No	-0.433699	0	92	0	No	ARM	206	206	28.6984	0.536766	0	0	0.423041	2.88625	0.0501599	0	0	2.08473
C46E10.9	chrII	3727774	3729837	-	No	-0.217026	0	0	0	No	ARM	77	77	39.2353	0	0.208655	0	0.647596	3.88671	0.0403443	0	0	0
C46F11.1	chrIII	3644356	3648804	+	No	-0.434313	231	51	485	No	ARM	604	604	105.205	8.48864	13.0772	4.86456	1.58401	0.212367	0.138794	0	0	1.28986
C46F11.2	chrIII	3650887	3653136	+	No	-0.314443	0	0	44	YES	ARM	318	289	50.4325	61.8708	64.7803	59.9117	62.9767	276.884	62.9057	15.51	0	93.9296
C46F11.3	chrIII	3648784	3650814	-	No	-0.330841	0	0	77	No	ARM	415	415	46.7639	6.64193	6.20767	9.92586	13.1472	36.5146	3.60541	0	0	1.31151
C46F11.4	chrIII	3657694	3664476	-	No	-0.527713	501	387	1404	No	ARM	1005	606	169.637	32.7743	8.38725	15.8053	15.7471	42.6798	14.0493	1.42	0	9.05927
C46F11.5	chrIII	3652848	3657584	-	YES	-0.456349	254	71	784	No	ARM	822	292	128.36	35.0959	15.3456	13.8683	20.7489	27.6381	3.93006	2.13	0	47.6945
C46F11.6	chrIII	3667080	3670420	-	No	-0.359905	0	0	240	No	ARM	949	915	28.2266	57.0806	33.3268	13.6101	8.32518	8.68494	1.0338	1.03	4.57	858.82
C46F9.1	chrII	1905433	1998538	+	No	-0.347185	2600	6741	33324	No	ARM	1966	1966	43.2745	3.0536	14.1991	14.9824	10.7971	0.357846	0.168488	5.62	0	0
C46F9.2	chrII	1902285	1904451	+	No	-0.360711	94	0	174	No	ARM	627	627	27.0857	0	0.275526	0	0	0.031174	0.0208746	0	0	0
C46F9.3	chrII	1900242	1901926	+	No	-0.250841	0	0	0	No	ARM	132	132	37.8431	2.49383	7.78878	12.8045	8.50929	0.398636	0.103624	4.11	0	0
C46F9.4	chrII	1895691	1897763	+	No	-0.278204	0	0	0	No	ARM	125	108	31.248	0	0	0	0	0.00806043	0.0150183	0	0	0
C46H3.1	chrX	1209405	1210840	+	No	-0.461816	153	0	282	No	ARM	391	391	34.9078	0.771352	1.70244	0	0	0.043262	0	0	0	0
C46H3.2	chrX	1211753	1220024	-	No	-0.362283	0	249	142	No	ARM	2555	2555	44.766	25.183	9.54123	2.01504	3.16733	4.38699	0.0708711	0	0	36.0744
C46H3.3	chrX	1226218	1230755	-	No	-0.412473	0	216	503	No	ARM	2518	275	55.2987	5.72255	2.98077	2.122	0.795678	0	0	0	0	0
C47A10.1	chrV	17755870	17764725	+	No	-0.477039	0	1918	2908	No	ARM	1646	1646	73.307	0.263709	9.21458	8.87588	5.32554	0.135094	0.0997782	0	0	13.4161
C47A10.10	chrV	17792652	17794060	-	No	-0.313402	0	0	495	No	ARM	383	383	12.3342	0	0	0	0	0	0	0	0	0
C47A10.11	chrV	17790464	17792444	+	No	-0.387923	61	0	425	No	ARM	993	993	39.6757	0	0	0	0	0	0	0	0	0
C47A10.12	chrV	17777897	17779461	+	No	-0.381574	0	310	0	No	ARM	933	933	23.6442	0	0	0	0	0.0399219	0.399689	0	0	0
C47A10.2	chrV	17765321	17766754	+	No	-0.42074	0	0	452	No	ARM	315	315	9.32381	0	0	0.601047	0	0.0390315	0	0	0	0.617251
C47A10.3	chrV	17767522	17769595	+	No	-0.458561	121	28	563	No	ARM	973	973	14.3895	0	0	0	0	0	0	0	0	0
C47A10.4	chrV	17769626	17773182	-	No	-0.58976	198	1063	1793	No	ARM	1311	342	61.151	0	0	0	0	0	0.00430618	0	0	0
C47A10.5	chrV	17774218	17777203	-	No	-0.403064	0	1023	887	No	ARM	1255	358	267.14	0	5.1409	7.21613	4.05287	0.188956	0.905529	0	0	1.35812
C47A10.6	chrV	17780421	17783613	-	No	-0.390441	811	19	642	No	ARM	685	637	88.125	0	1.32466	1.89108	1.34449	0.0224663	0.00403873	0	0	0.289478
C47A10.7	chrV	17794882	17795729	-	No	-0.316188	0	0	93	No	ARM	181	181	10.7624	0	0	0	0	0	0	0	0	0
C47A10.8	chrV	17796173	17798863	-	No	-0.424524	125	763	423	No	ARM	1051	1051	38.1667	0	2.71364	0	0	0	0	0	0	0
C47A10.9	chrV	17800811	17801880	+	No	-0.229578	0	0	0	No	ARM	46	45	14.913	0	0	0	0	0	0	0	0	0
C47A4.1	chrIV	13715881	13716645	-	No	-0.289518	0	0	302	No	ARM	218	218	24.1651	0	1.45195	1.04027	0	57.3669	18.5033	0	0	0
C47A4.2	chrIV	13728271	13732567	+	No	-0.378478	594	182	231	No	ARM	1315	46	54.384	2.19033	15.0227	21.9769	10.9341	0.177555	0.166601	1.73	0	7.51551
C47A4.3	chrIV	13741017	13742241	-	No	-0.261433	0	0	285	No	ARM	70	60	10.8627	0	0	3.05303	7.44786	0.14003	48.5716	0	0	0
C47B2.1	chrI	12960360	12962380	-	No	-0.318841	0	0	414	No	ARM	346	346	58.6185	7.78207	4.64623	7.45344	10.6283	12.5934	4.09735	0	0	13.4706
C47B2.2	chrI	12961843	12964568	-	No	-0.345939	0	60	429	No	ARM	587	82	243.05	54.1366	39.8607	54.2997	69.0513	148.361	34.5241	2.88	0	129.578
C47B2.3	chrI	12964667	12966865	-	No	-0.351569	0	0	168	YES	ARM	343	343	10.2642	520.179	326.253	298.979	285.171	2408.35	849.812	50.54	6.61	244.193
C47B2.4	chrI	12967204	12968271	-	No	-0.167621	0	0	0	YES	ARM	58	58	25.1207	105.892	78.3954	112.821	122.48	672.883	188.613	11.84	1.23	70.7535
C47B2.5	chrI	12968909	12970227	+	No	-0.327513	0	45	168	YES	ARM	273	273	51.4579	68.841	76.6313	75.6409	70.6172	235.232	64.9982	9.85	0	50.7886
C47B2.6	chrI	12975172	12978677	+	YES	-0.469363	559	761	0	YES	ARM	4912	675	267.142	94.7062	46.4537	60.1549	42.8585	64.9192	17.3855	1.45	1.14	24.8884
C47B2.7	chrI	12978827	12982442	+	No	-0.407744	0	487	167	No	ARM	1278	43	140.866	3.12494	2.69515	2.09715	2.75153	17.3606	3.9095	0	0	1.88122
C47B2.9	chrI	12982040	12984019	+	No	-0.493373	0	0	59	No	ARM	619	67	124.336	11.0934	16.4223	15.2849	21.0208	37.6122	10.4082	6.2	0	1.9562
C47D12.1	chrII	11661515	11675863	-	No	-0.292855	0	59	166	YES	ARM	613	55	159.569	43.7305	17.4959	15.1545	26.6057	18.4218	5.23917	0	0	19.9204
C47D12.2	chrII	11676241	11679370	+	No	-0.29962	0	46	0	No	ARM	311	50	67.492	61.8724	31.9357	33.8302	50.2706	130.886	44.4867	7.08	0	37.1426
C47D12.3	chrII	11679032	11680971	-	No	-0.397001	0	0	484	No	ARM	761	761	6.70171	0.96463	0.317804	2.07524	2.75598	6.64527	56.9617	0	0	0
C47D12.4	chrII	11681760	11682780	+	No	-0.241224	0	0	0	No	ARM	49	49	10.4286	20.0829	0.858901	0	2.134	0.129051	0.0245216	0	0	0
C47D12.5	chrII	11683414	11685225	-	No	-0.289607	0	0	222	No	ARM	759	759	28.3175	1.16466	0.767413	2.18628	4.49233	21.4308	15.3562	0	0	4.41856
C47D12.6	chrII	11691261	11695593	-	No	-0.310401	46	41	96	YES	ARM	1479	1479	32.1529	36.9988	86.4001	118.644	126.253	316.748	93.2386	20.16	1.14	15.7236
C47D12.7	chrII	11694763	11695939	+	No	-0.600844	240	41	0	No	ARM	3451	732	23.3251	13.5386	6.05591	1.60016	1.93446	1.04534	0.16915	0	0	62.7253
C47D12.8	chrII	11696106	11705297	+	No	-0.4105	332	317	1010	No	ARM	2302	2302	202.42	11.3086	9.3785	10.7055	23.1103	65.8029	17.9809	0	0	10.5269
C47F8.1	chrI	12335049	12336593	+	No	-0.304408	0	0	83	No	ARM	507	507	32.3748	17.3966	0	0	0.992782	8.70651	0.0142103	1.87	0	0
C47F8.2	chrI	12331075	12333404	+	No	-0.373755	156	131	177	No	ARM	889	889	180.731	2.81502	0	0	0	0.0439672	0.00547845	0	0	0
C47F8.3	chrI	12315183	12316679	-	No	-0.396023	0	104	163	No	ARM	218	218	26.0364	0	0	0	0	0	0.00588021	0	0	0
C47F8.4	chrI	12317311	12318726	-	No	-0.344302	0	0	0	No	ARM	348	348	21.6667	0	0	0	0	0.0098473	0	0	0	0
C47F8.5	chrI	12321927	12324053	+	No	-0.325301	0	0	131	No	ARM	755	755	82.7619	0	0	0	0	0.0131757	0	0	0	0
C47F8.6	chrI	12319340	12320845	+	No	-0.640148	70	0	183	No	ARM	182	182	38	0	0	0	0	0.0167224	0.00406761	0	0	0
C47F8.7	chrI	12326431	12327013	-	No	-0.25188	0	0	257	No	ARM	50	50	5.88372	10.7415	1.78272	0	0	0	0	0	0	0
C47F8.8	chrI	12328090	12329499	-	No	-0.2865	0	0	0	No	ARM	64	50	29.5938	4.58608	0	0	0	0.0445245	0.0106099	0	0	0
C47G2.1	chrII	11269059	11271535	+	No	-0.345082	0	0	0	No	ARM	680	680	9.52353	0	0	0.578487	0.578487	0.0640608	0.0148867	0	0	0
C47G2.2	chrII	11281921	11283890	+	No	-0.351111	0	0	65	YES	ARM	434	434	13.5207	20.3629	6.10788	2.1679	1.97353	0.125712	1.3738	1.99	0	9.68261
C47G2.3	chrII	11288634	11290097	-	No	-0.213256	0	169	0	YES	ARM	712	712	120.647	19.838	36.898	34.8027	45.8919	166.352	68.397	2.3	3.26	37.275
C47G2.4	chrII	11290780	11293508	-	No	-0.279408	0	0	68	No	ARM	145	49	12.5254	37.281	13.2526	17.5553	28.2363	110.083	11.0391	1.03	0	22.1908
C47G2.5	chrII	11297635	11301200	+	No	-0.42133	0	0	0	No	ARM	327	327	6.2766	99.6737	29.4178	34.8166	55.4019	71.2499	13.9081	2.5	1.39	86.8218
C47G2.6	chrII	11293932	11294515	+	No	-0.238095	0	0	0	No	ARM	169	169	7.01775	3.01834	2.10567	0	1.18942	1.14845	0.38495	0	0	0
C47G2.7	chrII	11295498	11295955	-	No	-0.217525	0	0	0	No	ARM	59	59	0.169492	0	0	0	0	0.155423	0.158202	0	0	0
C47G2.8	chrII	11294687	11295580	-	No	-0.270691	0	0	0	No	ARM	288	288	15.684	0	0	1.51389	2.81114	1.33029	0.302394	0	0	0
C48D1.1	chrIV	13193642	13197358	-	No	-0.306906	0	46	1068	No	ARM	467	467	40.4212	44.6727	5.67605	1.88185	3.6332	0.135916	0.0352981	5.12	0	1.14933
C48D1.2	chrIV	13198255	13206272	-	No	-0.521638	1153	88	558	No	ARM	1188	1188	65.8651	11.2255	1.31486	5.54209	13.8398	183.111	23.1557	0	0	1.3471
C48D1.3	chrIV	13209249	13214542	-	No	-0.364131	0	0	1086	No	ARM	1321	1321	48.6678	1.42371	21.0606	4.16885	2.31368	0.0214751	0.029912	1.03	0	18.3088
C48D1.5	chrIV	13221936	13223364	+	No	-0.352031	0	0	534	No	ARM	418	418	35.7368	7.80844	0	0	0	0	0.0134246	0	0	0.502087
C48D1.9	chrIV	13207365	13209664	-	No	-0.411773	0	0	332	No	ARM	560	295	34.2169	0	0	2.06227	2.94749	1.12922	20.8003	0	0	0
C48D5.1	chrIII	3573686	3578377	+	No	-0.367657	0	0	650	YES	ARM	1815	140	42.0303	0.444835	8.92202	1.65375	0.862693	0.305316	0.0282889	0	0	7.75904
C48D5.2	chrIII	3590720	3612567	+	YES	-0.371121	242	403	1777	No	ARM	5479	461	134.884	29.9395	19.6532	9.64534	5.48049	4.26027	0.617129	0	2.23	74.2944
C48D5.3	chrIII	3578818	3581719	-	No	-0.323484	0	0	740	No	ARM	1296	802	47.0694	0	0.62099	0	0	0	0.0151127	1.37	1.42	0
C49A1.1	chrI	14213668	14215778	+	No	-0.394854	0	0	802	No	ARM	858	329	14.4772	0	1.09908	0	0	0.0239251	0.0194938	0	0	0
C49A1.10	chrI	14241884	14244442	-	No	-0.332008	0	0	1069	No	ARM	808	774	141.266	43.529	64.7615	32.0674	23.9793	7.6764	5.16391	0	0	11.9794
C49A1.2	chrI	14209202	14212489	-	No	-0.453688	153	98	715	No	ARM	1169	1169	46.0833	0	0	0.336668	1.8925	0.0724495	9.83471	0	0	0
C49A1.3	chrI	14216743	14220563	-	No	-0.501536	1032	609	1031	No	ARM	1020	1020	37.4794	0.354665	0.268425	1.14194	0.668038	0.267896	27.0799	0	0	9.407
C49A1.4	chrI	14220726	14231331	-	No	-0.406631	318	698	1974	YES	ARM	4009	1670	232.329	35.2163	1.83857	1.25921	1.3426	0.603174	0.080988	0	0	189.525
C49A1.5	chrI	14237346	14241176	+	No	-0.359337	0	1761	677	No	ARM	1056	1014	17.6752	5.75298	0	0	0	0	0	0	0	0
C49A1.6	chrI	14246215	14247302	+	No	-0.309143	0	0	42	No	ARM	59	42	24.4186	0	0	0	0	0	0	0	0	0
C49A1.9	chrI	14231657	14235936	-	No	-0.334556	812	49	642	No	ARM	554	489	170.249	0	1.16813	0	0	0	0	0	0	2.00563
C49C3.1	chrIV	17312122	17315731	+	No	-0.297733	0	41	110	No	ARM	240	45	42.5	0	0.184782	2.87207	11.1763	1.93999	27.7164	0	0	0
C49C3.10	chrIV	17336762	17338947	-	No	-0.299867	0	0	0	No	ARM	314	45	29.5306	2.52566	12.5573	13.7402	8.00876	0.118785	0.0662775	4.07	0	0
C49C3.11	chrIV	17343744	17344772	+	No	-0.284596	0	0	0	No	ARM	82	47	18.9024	0	0	0.519769	1.13684	0.433938	0.455566	0	0	0
C49C3.12	chrIV	17345509	17346658	-	No	-0.27799	0	0	735	No	ARM	313	313	15.3035	0	0.478374	1.0927	0.544325	0	0.0139038	0	0	0
C49C3.13	chrIV	17347130	17351039	+	No	-0.321475	0	0	2106	No	ARM	649	649	21.2692	0	2.80738	1.30359	1.53524	0.00849759	0.00615586	0	0	0
C49C3.15	chrIV	17334155	17335052	+	No	-0.126812	0	0	19	No	ARM	48	48	3.33333	11.1392	6.57214	6.10677	5.95188	8.03667	0.548732	1.44	0	4.54265
C49C3.2	chrIV	17316672	17318209	+	No	-0.304152	0	0	256	No	ARM	262	46	28.7391	0	0	0.953436	0.476228	0.0915363	9.57668	0	0	0
C49C3.20	chrIV	17316117	17316464	-	No	-0.188625	0	0	0	No	ARM	55	48	9.25	0	0	1.6999	1.6999	0.304888	0.27118	0	0	0
C49C3.21	chrIV	17343013	17343456	+	No	-0.314902	0	0	266	No	ARM	61	61	6.95082	4.01251	0	0	2.57811	0	0	0	0	0
C49C3.3	chrIV	17319315	17319990	-	No	-0.28797	0	0	0	No	ARM	101	101	2.09524	0	0	0	0	0.0242709	0.0402319	0	0	0
C49C3.4	chrIV	17320757	17328626	+	YES	-0.678584	615	0	0	No	ARM	899	899	55.7798	27.1665	81.3168	95.8156	65.8556	1.18849	0.499561	25.89	0	2.67569
C49C3.5	chrIV	17329167	17330702	+	No	-0.343491	0	0	0	YES	ARM	384	57	22.8765	9.39477	6.88638	4.73795	2.95225	3.43694	0.346203	2.95	0	57.5651
C49C3.6	chrIV	17331489	17332568	+	No	-0.252038	0	0	0	No	ARM	155	53	30.2	38.1316	10.1187	20.4163	36.3897	186.182	40.9568	19.35	6.42	29.2344
C49C3.7	chrIV	17332535	17333608	+	No	-0.187723	0	0	0	No	ARM	49	47	1.70213	15.3088	5.63039	16.4033	26.6679	173.53	52.1052	2.79	0	5.00609
C49C3.8	chrIV	17335232	17336648	+	No	-0.247135	0	0	0	No	ARM	311	311	28.3215	24.0724	12.9176	6.09209	7.43576	5.02851	0.256625	5.52	0	5.05783
C49C3.9	chrIV	17339618	17342277	-	No	-0.262137	0	0	0	No	ARM	372	372	17.7378	1.90644	9.9755	16.0184	11.6656	0.63739	0.311897	5.03	0	0
C49D10.10	chrII	3873542	3877229	-	No	-0.437596	144	203	238	No	ARM	671	671	56.0312	0.310534	0	0.902288	0.412301	0.104841	3.18547	0	0	0
C49D10.11	chrII	3877346	3877912	-	No	-0.26449	0	18	14	No	ARM	51	49	63.3333	33.3404	0	0	0	0.418778	0	0	0	0
C49D10.2	chrII	3880246	3882184	+	No	-0.344593	0	0	0	No	ARM	491	491	20.0476	0	0	0	0	0	0	0	0	0
C49D10.3	chrII	3878631	3879893	+	No	-0.350272	73	0	0	No	ARM	287	287	12.3519	0.874562	0	0	0	0	0	0	0	0
C49D10.4	chrII	3869902	3873012	+	No	-0.311421	53	65	287	No	ARM	423	423	71.2833	0	0	0.425411	0.677934	0	0	0	0	0
C49D10.6	chrII	3866799	3868245	+	No	-0.372583	0	0	0	No	ARM	72	72	29.5556	0	0	0	0	0	0	0	0	0
C49D10.7	chrII	3855922	3856590	+	No	-0.242365	0	0	0	No	ARM	167	167	15.497	0	0	0	0	0	0	0	0	0
C49D10.8	chrII	3858143	3860928	-	No	-0.332653	0	0	0	No	ARM	241	49	45.5	0	0	0	0	0.00383526	0	0	0	0
C49D10.9	chrII	3863085	3864754	-	No	-0.381033	0	30	0	No	ARM	152	152	49.2889	0	0	0	0	0	0	0	0	0
C49G7.1	chrV	4056149	4059051	-	No	-0.414068	293	0	435	No	ARM	605	605	41.5074	0	0	0.309363	0.268203	0.0696791	10.1465	0	0	0
C49G7.10	chrV	4040393	4041989	-	YES	-0.291481	0	0	226	No	ARM	541	52	96.1904	0.455501	31.1951	16.2437	14.7759	2.74475	0.360147	25.54	9.65	63.4046
C49G7.11	chrV	4054165	4055094	-	No	-0.239809	0	0	0	No	ARM	257	257	22.1362	1.59016	0	0	0.862382	0.206302	0.0253312	0	0	0
C49G7.12	chrV	4038805	4039919	+	No	-0.272408	0	0	99	No	ARM	81	49	29.5	0	11.6854	2.67861	1.57827	0.389497	0.958154	5.26	0	17.0614
C49G7.2	chrV	4047825	4049339	+	No	-0.418401	0	0	234	No	ARM	431	431	11.5081	0	0.877893	0	0	0	0	0	0	0
C49G7.3	chrV	4046389	4047421	+	No	-0.283843	0	0	51	No	ARM	51	51	2.15686	0.456477	187.636	123.716	58.3978	2.54869	2.40797	7.61	1.9	429.35
C49G7.4	chrV	4043900	4044986	+	No	-0.275173	0	0	0	No	ARM	52	52	15.8889	0	0.922485	1.92433	2.67827	0.369427	0.244919	1.63	0	8.32289
C49G7.5	chrV	4042388	4043585	+	No	-0.278705	0	0	0	No	ARM	166	166	35.988	0	19.8354	4.79132	5.7498	0.37222	0.0341701	2.64	0	98.1175
C49G7.7	chrV	4034460	4038039	+	No	-0.331485	0	0	38	No	ARM	384	303	40.3542	0	1.10577	0.211189	0.461912	0.0783894	0.00328658	0	0	1.42158
C49G7.8	chrV	4031611	4033372	+	No	-0.375222	0	0	68	No	ARM	51	45	29.6	1.22287	17.8041	0.945264	0	0.0110125	0.00521586	0	0	0
C49G9.1	chrI	12564246	12565883	+	No	-0.311902	0	0	498	No	ARM	811	61	61.1566	0.625145	0.534488	0	1.65887	0.298805	0.0972943	0	0	2.23966
C49G9.2	chrI	12562803	12564200	+	No	-0.296254	0	0	177	No	ARM	846	846	32.766	1.67854	0	1.63297	4.14844	0.462432	0.133768	0	0	0
C50A2.2	chrIV	1170705	1177749	+	No	-0.415102	456	1223	859	No	ARM	1465	895	199.499	17.3051	5.34542	5.44324	14.0364	55.8808	9.98691	0	0	61.274
C50A2.3	chrIV	1145677	1150736	-	No	-0.35444	586	123	414	No	ARM	1871	680	59.2103	0	3.78437	3.41245	3.3636	0.816911	0.615705	6.6	0	7.75386
C50A2.4	chrIV	1159636	1161545	-	No	-0.407894	337	0	449	No	ARM	946	367	35.4281	2.90474	0.851052	0	0	0	0	0	0	0
C50D2.1	chrII	111643	114454	+	No	-0.296648	0	0	296	No	ARM	649	54	33.9483	41.4343	8.03756	1.73798	1.17856	0.00606711	0.0124256	0	0	0.299542
C50D2.10	chrII	99725	100962	+	YES	-0.234356	24	0	101	No	ARM	77	45	49.6667	6.66002	5.48871	5.97598	9.30932	14.5921	4.30407	0	0	26.7509
C50D2.2	chrII	109164	111427	+	No	-0.239351	0	0	0	No	ARM	57	57	35.3478	6.49885	8.01711	1.73754	0.620611	0.277669	0.229139	0	0	28.3617
C50D2.3	chrII	106256	107521	+	No	-0.442583	0	89	438	No	ARM	470	204	28.217	0	0	1.5334	4.02404	0.153676	46.4155	0	0	0
C50D2.4	chrII	104533	105819	+	No	-0.286614	0	0	0	No	ARM	58	44	29.9091	17.2279	5.88652	6.34597	6.74753	1.17378	1.3862	0	0	0
C50D2.5	chrII	98150	98962	+	No	-0.270727	0	0	0	No	ARM	66	66	4.51515	53.9705	19.6335	25.8662	38.3042	215.783	67.4612	5.54	1.15	20.1355
C50D2.6	chrII	84433	87799	+	No	-0.405502	76	0	0	No	ARM	910	618	28.1481	2.99962	4.98632	0.651517	2.48036	0.650163	0.0666048	1.1	0	95.7362
C50D2.7	chrII	92180	95280	-	No	-0.286499	0	298	657	No	ARM	578	373	200.111	42.7379	23.8343	18.6202	29.863	34.2968	3.90849	4.45	0	46.5672
C50D2.8	chrII	96126	98027	-	No	-0.318137	0	113	167	No	ARM	358	358	280.858	45.9277	17.7257	22.1657	32.7291	96.18	22.1655	0	0	38.604
C50D2.9	chrII	88564	91521	-	No	-0.371633	187	22	345	No	ARM	495	330	127.455	15.7038	21.1271	30.2681	35.9411	50.9731	14.1938	0	0	8.30284
C50E10.1	chrII	12301018	12302350	-	No	-0.36388	31	213	330	No	ARM	467	467	81.3087	2.45083	0.642894	4.38916	16.5262	1.24317	245.59	0	0	0
C50E10.10	chrII	12311795	12313596	+	No	-0.342126	0	126	313	No	ARM	562	562	44.0214	0.40374	0.750725	0	0	0.0389428	0.0195284	0	0	0
C50E10.11	chrII	12303460	12305068	+	No	-0.292401	0	0	217	No	ARM	494	494	41.7308	0.453517	0	0	0	0.0325798	0.617769	0	0	0
C50E10.2	chrII	12305391	12307764	-	No	-0.37519	0	0	251	No	ARM	650	363	27.4262	0	0	0.353602	0.353602	0.077782	34.5223	0	0	0
C50E10.3	chrII	12321128	12323341	-	No	-0.335325	0	56	240	No	ARM	1018	1018	85.4607	0	1.37845	0	0	0	0.0182858	0	0	0
C50E10.4	chrII	12339879	12344729	+	No	-0.567239	0	56	597	No	ARM	771	515	36.4101	29.8283	8.59568	3.29107	3.39448	21.725	0.714625	1.85	0	229.813
C50E10.5	chrII	12335665	12338029	+	No	-0.409601	0	356	119	No	ARM	612	551	69.8513	0	0	0	0	0	0	0	0	0
C50E10.6	chrII	12332859	12334980	+	No	-0.31731	0	0	418	No	ARM	629	629	109.507	0.438648	0.461955	0	0	0.0245723	0.0370019	0	0	0
C50E10.7	chrII	12329229	12331058	+	No	-0.31632	0	0	113	No	ARM	562	175	90.8541	0	0.464494	0	0	0	0.00433565	0	0	0
C50E10.8	chrII	12325479	12327450	+	No	-0.483074	309	0	195	No	ARM	822	822	15.1107	0	0.33473	0	0	0	0.00217527	0	0	0
C50E10.9	chrII	12318776	12321006	+	No	-0.282674	0	0	145	No	ARM	782	782	61.8476	0	0	0	0	0.0261742	0	0	0	0
C50F2.1	chrI	3892334	3895274	+	No	-0.452092	0	0	112	No	ARM	406	251	26.7586	0	0	0.328698	0	0.0077674	0.0043704	0	0	0
C50F2.2	chrI	3881830	3888456	+	No	-0.416585	280	69	1535	No	ARM	1810	819	222.51	11.0616	2.6584	4.77949	8.11209	85.0215	8.45228	0	0	8.96641
C50F2.3	chrI	3877063	3880758	+	No	-0.34351	117	0	299	YES	ARM	470	388	103.932	64.0493	27.5669	36.6655	46.1311	97.245	29.1653	1.63	0	15.9922
C50F2.4	chrI	3888333	3891521	-	YES	-0.463326	260	0	73	No	ARM	1164	605	21.1263	52.7266	72.5766	44.7231	38.3191	0.314769	0.0793916	0	0	7.85725
C50F2.5	chrI	3895794	3897403	-	No	-0.437899	0	0	1360	No	ARM	277	277	28.9796	0	0	0.348844	0.886211	0.163957	15.6727	0	0	0
C50F2.6	chrI	3898048	3899909	-	No	-0.317152	0	0	167	No	ARM	474	277	6.01143	103.692	45.8806	69.1382	14.4108	7.86595	2.99376	0	0	6.25947
C50F2.7	chrI	3900331	3901383	-	No	-0.313391	0	0	0	No	ARM	350	350	20.84	1.91069	26.7336	8.95703	7.02762	0.0896392	0.0704817	0	0	43.7961
C50F2.8	chrI	3901434	3905203	-	No	-0.311017	0	0	0	No	ARM	636	359	129.671	16.2341	10.108	1.96083	1.47121	0.19142	0.104345	0	0	43.6016
C50F2.9	chrI	3886113	3887083	-	No	-0.351923	0	69	315	No	ARM	712	712	44.1657	0	0	1.60766	7.90134	0.693528	0.244433	0	0	0
C50H11.1	chrV	3089071	3091349	+	No	-0.470599	164	0	332	No	ARM	414	414	76.1731	2.79534	4.13428	4.60627	2.04287	2.86052	0.133786	0	0	8.11438
C50H11.10	chrV	3059637	3062176	-	No	-0.454753	501	93	718	No	ARM	1003	1003	36.6383	0	0	0	0	0	0	0	0	0
C50H11.11	chrV	3063157	3064915	-	No	-0.373101	0	0	444	No	ARM	477	189	34.2698	0	0	0	0	0	0	0	0	0
C50H11.12	chrV	3068132	3069199	-	No	-0.300507	0	0	17	No	ARM	71	71	12.9859	0	0	0	0	0	0	0	0	0
C50H11.13	chrV	3069895	3071646	-	No	-0.269745	0	0	0	No	ARM	256	47	32.5938	0	0.469655	0	0	0	0	0	0	0
C50H11.14	chrV	3079446	3080890	-	No	-0.440795	98	0	174	No	ARM	268	268	21.6231	0	0	0	0	0	0	0	0	0
C50H11.15	chrV	3091812	3094499	-	No	-0.372278	0	174	324	No	ARM	668	668	22.9071	0.98698	10.5538	9.73735	6.86438	0.867093	0.445476	0	0	28.4306
C50H11.16	chrV	3095089	3096175	-	No	-0.320081	0	0	0	No	ARM	74	74	14.0811	0	0	0	0	0	0	0	0	0
C50H11.17	chrV	3097127	3098686	-	No	-0.292431	0	0	86	No	ARM	312	276	31.6232	0	0	0	0	0	0	0	0	0
C50H11.2	chrV	3086557	3087984	+	No	-0.356348	0	111	123	No	ARM	276	276	84.24	0	0	0	0	0	0	0	0	0
C50H11.3	chrV	3083642	3085213	+	No	-0.321172	0	207	250	No	ARM	401	401	9.83042	0	0	0	0	0	0	0	0	0
C50H11.4	chrV	3081768	3083025	+	No	-0.258816	0	0	0	No	ARM	103	103	46	0	0	0.53483	0	0.0234821	0	0	0	0
C50H11.5	chrV	3078069	3079298	+	No	-0.2158	0	0	0	No	ARM	68	55	14.0882	0	0	0	0	0	0	0	0	0
C50H11.6	chrV	3075404	3077171	+	No	-0.374207	0	0	434	No	ARM	610	610	25.0754	0	0	0	0	0	0	0	0	0
C50H11.7	chrV	3066225	3067495	+	No	-0.416942	0	0	74	No	ARM	173	173	30.7077	0	0	0	0	0	0.00343999	0	0	0
C50H11.8	chrV	3054550	3055905	+	No	-0.270165	0	84	149	No	ARM	406	406	30.9212	0	1.98757	0.437066	0.437066	0	0	2.05	3.96	0
C50H11.9	chrV	3057696	3059094	-	No	-0.278796	0	0	50	No	ARM	294	294	75.0408	0	0	0	0	0	0	0	0	0
C52A11.4	chrII	10738926	10775002	-	No	-0.38548	436	141	3282	No	ARM	3793	415	89.4545	8.47843	24.2014	9.58878	4.71451	0.313591	0.0685673	0	1.26	2638.22
C52B11.2	chrX	1300143	1308130	+	No	-0.342199	124	59	343	No	ARM	4287	1166	32.4019	45.4026	12.7241	7.79421	5.14905	1.002	0.234818	3.49	0	305.872
C52B11.3	chrX	1295272	1298653	+	No	-0.344112	0	190	295	No	ARM	644	278	45.3991	2.1905	1.68291	0.268895	0.728024	1.15495	0.0171942	0	0	129.867
C52B11.4	chrX	1285203	1285858	+	No	-0.250223	0	66	319	No	ARM	319	319	60.7273	1.71225	0	0	0	0	0	0	0	2.21503
C52B11.5	chrX	1272816	1275405	+	No	-0.307179	0	0	506	No	ARM	756	390	101.955	1.46118	6.83046	18.7416	26.3923	0.196876	0.425921	4.22	0	0
C52D10.1	chrIV	17186873	17189770	+	No	-0.379315	0	0	0	No	ARM	869	317	50.5907	28.7528	15.3274	36.6719	14.6171	0.249568	0.178064	2.37	0	0.494486
C52D10.11	chrIV	17190167	17191855	-	No	-0.304724	0	49	60	No	ARM	914	914	31.3053	0.858235	51.1901	4.8343	7.15445	0.185095	0.0577776	5.01	0	59.757
C52D10.12	chrIV	17197871	17206809	-	No	-0.329551	0	203	531	No	ARM	1053	1033	61.096	12.7616	21.9662	17.2254	13.7747	3.02891	0.58539	7.27	0	34.2143
C52D10.3	chrIV	17176438	17182628	+	No	-0.354361	0	0	371	No	ARM	3563	3563	40.703	40.0747	15.9073	45.9089	8.02283	0.222667	0.0836761	0	0	0
C52D10.6	chrIV	17167221	17168015	+	No	-0.255527	0	0	0	No	ARM	131	131	27.1756	160.079	0	0	9.013	1.07938	0.0177924	0	1.05	0
C52E2.1	chrII	1854389	1855365	+	No	-0.173714	0	0	0	No	ARM	49	49	17.102	17.2406	0	0	1.59359	0.0370728	0.00762876	0	0	0
C52E2.2	chrII	1852807	1853097	+	No	-0.194167	0	0	0	No	ARM	54	54	28.6296	0	3.35918	0	0	0	0	0	0	0
C52E2.3	chrII	1851248	1852662	+	No	-0.339139	0	7	0	No	ARM	452	452	13.9753	2.02674	0	0	0.675473	0	0	0	0	0
C52E2.4	chrII	1843194	1846189	+	No	-0.54655	233	0	93	No	ARM	464	464	33.1333	1.67363	1.7398	3.38588	1.0574	0.106398	0.0338692	7.86	0	1.33397
C52E2.5	chrII	1840980	1842948	-	No	-0.271375	6	0	0	No	ARM	88	88	16.5962	1.05009	2.3659	1.57197	1.37672	0.0465914	0.0290672	4.93	0	0
C52E2.6	chrII	1846595	1848159	-	No	-0.352062	0	0	98	No	ARM	451	451	20.4479	1.76022	0	1.11799	5.49473	2.3948	0.0201725	0	0	0
C52E2.7	chrII	1849434	1850408	-	No	-0.252019	0	0	0	No	ARM	54	54	30.1111	39.4059	0.396219	0	3.90592	0	0	0	0	0
C52E2.8	chrII	1855623	1857802	-	No	-0.39648	0	0	62	No	ARM	229	229	5.72052	0.246992	0	0	0.327656	0	0.00477329	0	0	0
C53C11.1	chrX	17339832	17342146	+	No	-0.296047	0	0	1782	No	ARM	766	766	25.9974	0.875064	0	0	0	0.318561	0.045762	0	0	0
C53C11.2	chrX	17337165	17338651	+	No	-0.329017	0	0	48	No	ARM	1012	1012	24.1601	6.56374	41.9387	26.9926	17.654	1.70439	0.833447	0	0	0
C53C11.3	chrX	17318509	17326529	+	No	-0.339814	0	45	2838	No	ARM	624	624	32.0418	9.57697	13.62	5.282	2.24583	0.276953	0.0482752	0	0	70.0598
C53C11.5	chrX	17334048	17335882	+	No	-0.310396	0	0	0	No	ARM	808	808	33.0401	67.8897	21.868	16.4029	10.444	2.2147	1.55241	1.85	0	4.89384
C53D5.1	chrI	291215	305473	+	YES	-0.356008	227	137	1682	No	ARM	6744	4484	87.2366	11.69	21.6147	13.1104	8.87534	13.9496	10.1721	0	0	207.855
C53D5.2	chrI	283499	286153	+	No	-0.396647	0	102	749	No	ARM	659	346	105.531	35.6095	14.2803	3.59255	2.65113	0.321126	0.180103	2.42	0	68.0946
C53D5.3	chrI	280119	280445	+	No	-0.332471	0	0	0	No	ARM	104	104	6.54808	17.8988	2.28481	3.73671	3.73671	0	0.298918	0	0	21.3925
C53D5.4	chrI	286088	289139	-	No	-0.366701	0	102	60	No	ARM	555	511	132.865	12.5688	10.5831	5.05467	4.76164	23.0559	2.81443	4.52	0	20.4169
C53D5.5	chrI	305810	310888	-	No	-0.408855	216	266	690	YES	ARM	1000	1000	102.343	16.9704	16.7725	16.7437	5.69476	1.42668	0.385104	1.19	0	1.27142
C53D5.6	chrI	310980	314992	-	No	-0.223872	0	0	0	YES	ARM	57	47	37.3684	82.8607	181.453	172.479	159.327	402.535	100.687	8.17	1.84	194.312
C53H9.1	chrI	1834882	1835441	+	No	-0.171187	0	0	0	No	ARM	48	48	13.0417	530.418	2440.8	2898.43	2200.88	4821.25	2381.27	1169.22	4.17	300.874
C53H9.2	chrI	1832896	1834766	+	No	-0.368433	0	0	113	YES	ARM	125	67	19.5714	19.4178	37.0312	46.7664	59.547	98.3805	44.9084	23.9	1.13	121.211
C53H9.3	chrI	1832116	1832643	-	No	-0.189196	0	0	327	No	ARM	56	56	18.5714	58.3361	58.6602	88.1017	98.7005	149.089	49.5442	3.48	2.6	36.4796
C54C6.1	chrIII	3528533	3528955	+	No	-0.148655	0	0	0	YES	ARM	84	84	96.381	77.1932	174.105	271.732	197.174	901.216	462.377	1714.09	18.94	506.123
C54C6.2	chrIII	3538279	3541615	-	No	-0.455604	196	0	527	No	ARM	1015	1015	188.732	78.2007	61.6346	24.7316	19.2325	37.9433	102.869	1.19	0	51.042
C54C6.4	chrIII	3553635	3556614	+	No	-0.36359	52	0	0	No	ARM	999	796	32.1582	0	0	0	0	0	0	0	0	0
C54C6.5	chrIII	3549459	3549837	-	No	-0.23676	0	0	0	No	ARM	50	50	1.2	0	27.8372	2.99624	1.26456	0	0.0966938	0	0	12.2748
C54C6.6	chrIII	3534637	3537483	-	No	-0.428906	433	0	644	No	ARM	1047	1047	135.574	52.8386	23.2977	23.1771	29.7508	56.9336	9.481	5.15	1.96	30.1478
C54C6.7	chrIII	3545565	3546406	-	No	-0.313432	0	0	152	No	ARM	264	264	12.6	0	1.65417	1.07778	4.94992	0.25587	0.141323	1.37	0	2.23806
C54C8.1	chrI	12442288	12443718	+	No	-0.261848	0	0	0	No	ARM	62	46	38.8	0	0	0	0	0	0	0	0	0
C54C8.11	chrI	12462165	12465821	+	No	-0.374348	0	114	170	No	ARM	686	647	83.1634	0	0.620317	0	0	0	0.00276399	0	0	0
C54C8.2	chrI	12444576	12446492	+	No	-0.475708	0	0	170	No	ARM	195	185	85	0	1.42326	2.878	0	0	0	0	0	0
C54C8.3	chrI	12447156	12448411	-	No	-0.335022	0	0	354	No	ARM	66	46	34.2609	0	0.518637	0	0	0	0	0	0	0
C54C8.4	chrI	12449981	12452019	+	No	-0.350024	44	0	0	No	ARM	288	288	42.3667	4.88423	1.03999	3.15473	0	0	0	0	0	0
C54C8.5	chrI	12453378	12454754	+	No	-0.408424	0	0	0	No	ARM	288	288	14.4304	0	0	0	0	0	0	0	0	0
C54C8.6	chrI	12454842	12455719	-	No	-0.301306	0	0	142	No	ARM	337	337	5.52226	0	0	0	0	0	0	0	0	0
C54C8.7	chrI	12459488	12460893	-	No	-0.392578	89	0	0	No	ARM	62	45	10.7727	0.498242	0	0	0	0.013825	0	0	0	0
C54C8.8	chrI	12458017	12458986	+	No	-0.244634	969	0	0	No	ARM	71	71	3.82979	2.06896	0.428344	0	0	0.015637	0	0	0	0
C54E10.1	chrV	18815006	18818564	+	No	-0.289245	0	0	640	No	ARM	159	159	20.907	0	0.441881	0	0.376037	0.0140277	0.0012221	0	0	0
C54E10.2	chrV	18828806	18831259	+	No	-0.403399	220	705	1384	No	ARM	1752	679	108.211	1.58271	5.70478	1.42426	1.20012	0.0108328	0.0207041	0	0	265.468
C54E10.3	chrV	18810975	18813452	+	No	-0.489349	321	153	130	No	ARM	668	527	95.4873	0	1.97095	0.593511	0.514545	0.10256	6.79e-07	0	0	0
C54E10.4	chrV	18804054	18806480	-	No	-0.430943	0	78	885	No	ARM	547	547	136.236	2.87169	0.351176	0	0	0	0	0	0	0
C54E10.5	chrV	18796041	18800793	-	No	-0.468805	238	1548	372	No	ARM	1672	262	65.5602	2.90169	2.40005	3.03106	1.36071	0.0628749	0.0166755	2.34	0	0.799483
C54E10.6	chrV	18808050	18808632	-	No	-0.302117	0	96	0	No	ARM	213	213	141.521	28.6276	11.1702	3.38889	8.98754	1.69828	1.51833	4.19	0	114.277
C54E10.7	chrV	18811630	18819381	+	No	-0.362485	81	0	1212	No	ARM	5392	5392	68.1872	0	1.8916	0	0	6.59e-07	0.0091665	0	0	0
C54E10.8	chrV	18819736	18823417	+	No	-0.329054	24	83	985	No	ARM	2541	2541	139.326	0	1.19125	0	0	0	0	0	0	0.963174
C54E4.1	chrIV	2175605	2177579	+	No	-0.486257	72	0	909	No	ARM	742	742	125.016	1.23033	0.687299	0.56621	0	0.306363	0.0949903	0	0	7.85407
C54E4.2	chrIV	2136894	2146461	+	YES	-0.562616	1133	1710	2467	No	ARM	5534	1697	39.2575	169.19	185.08	195.249	188.728	10.1413	4.97954	0	0	106.208
C54E4.3	chrIV	2150649	2159162	-	No	-0.413195	433	999	3560	No	ARM	999	681	132.331	0.367701	3.62297	0	0	0.193145	0.00090353	0	0	0
C54E4.4	chrIV	2161475	2164870	-	No	-0.379897	556	0	1455	No	ARM	1754	1754	53.293	2.74087	8.87884	5.76323	0.818097	0.0805207	0.0257677	0	0	474.831
C54E4.5	chrIV	2146670	2149299	-	No	-0.422627	387	0	1394	No	ARM	766	386	46.1162	8.10468	31.6305	27.2374	19.177	0.950665	0.486734	0	0	10.1055
C54G6.1	chrI	1011388	1014384	-	No	-0.474827	243	1029	1474	No	ARM	1814	1814	84	5.62939	1.06274	8.41212	11.2245	33.2963	8.3011	0	0	0
C54G6.2	chrI	1003891	1010768	+	No	-0.425257	450	651	1792	No	ARM	1059	315	67.4514	1.56608	2.13323	1.72796	0.591691	0.220428	0.11149	0	0	14.1656
C54G6.3	chrI	996047	997111	+	No	-0.425583	0	0	0	No	ARM	709	709	14.7541	0	8.84349	1.4108	1.4108	0	0	0	0	316.82
C54G6.5	chrI	1016405	1017183	+	No	-0.456211	150	0	414	No	ARM	407	407	26.5971	1.14919	72.5964	79.3851	246.101	54.8547	27.0758	0	0	1.38235
C55C2.1	chrI	2568761	2570748	+	No	-0.351501	0	116	307	No	ARM	725	725	48.9393	2.80731	0	0	0	0	0	0	0	0
C55C2.3	chrI	2560397	2561822	+	No	-0.293191	0	239	532	No	ARM	351	351	22.4737	0.580983	0	1.00066	3.1361	0.151149	6.18946	0	0	0
C55C2.4	chrI	2558301	2560112	+	No	-0.446282	0	559	278	No	ARM	698	698	30.3043	0	0	0	0	0.01457	7.34492	0	0	0
C55C2.5	chrI	2571777	2576024	-	No	-0.436253	360	268	793	No	ARM	1004	1004	40	6.74126	31.4374	11.3061	7.93367	0.337	0.214896	0	0	96.3891
C56G7.1	chrIII	3392001	3393783	-	No	-0.405286	98	0	302	No	ARM	492	454	70.6872	227.721	80.8946	149.015	218.497	386.249	119.369	94.13	8.06	457.547
C56G7.2	chrIII	3386898	3389960	-	No	-0.454429	0	635	213	No	ARM	1034	709	27.0588	0.904599	1.06391	1.56497	0.906803	0.123974	5.93293	0	0	0
C56G7.3	chrIII	3389910	3392513	+	YES	-0.51203	322	280	413	No	ARM	623	460	105.262	10.9054	7.00863	8.48419	6.77854	11.8681	8.03193	7.03	1.37	61.307
CC4.2	chrI	12988219	12995462	+	No	-0.409652	94	55	84	No	ARM	5892	486	45.3699	9.04758	74.8094	24.1108	17.7213	0.569769	0.0973074	25.79	1.82	1119.95
CC4.3	chrI	12995795	13004366	+	No	-0.325245	54	125	121	No	ARM	2472	53	244.732	52.3175	22.7928	34.6286	32.8224	72.0025	15.3179	1.38	0	15.6991
CC8.1	chrIV	3638349	3639815	+	No	-0.327902	181	0	357	No	ARM	950	950	82.7411	2.86336	27.0662	18.7338	5.27439	2.79208	0.332447	0	0	169.73
CC8.2	chrIV	3645157	3648679	-	No	-0.387699	0	208	0	No	ARM	1564	1564	19.4238	10.4873	20.99	17.1416	19.2311	30.5854	0.386072	19.64	4.55	138.37
CC8.3	chrIV	3641390	3642302	-	No	-0.268851	0	44	569	No	ARM	652	652	107.948	0	3.35288	1.59529	4.05271	0	0	0	0	0
CE7X_3.1	chrX	3622	7154	+	No	-0.649606	0	0	0	No	ARM	1549	1549	257.419	1.15637	0	0.915994	1.15919	0.198666	0.0803255	0	0	0
CE7X_3.2	chrX	7581	9303	-	No	-0.373095	0	0	0	No	ARM	1053	1053	321.598	2.29115	4.76281	1.2446	0.619993	0.642814	0.505911	0	0	0
cTel3X.1	chrV	1479	3039	+	No	-0.348727	52	70	618	No	ARM	1068	1068	26.2837	2.75891	2.08075	0	0	0	0	0	0	0
cTel54X.1	chrIII	1270	2948	-	No	-0.434729	295	0	426	No	ARM	513	513	39.9474	3.793	9.81264	16.2583	4.75367	0.22845	0.102352	18.11	0	1.54217
cTel55X.1	chrX	17714889	17718641	+	No	-0.318673	50	0	289	No	ARM	1862	1862	23.6155	77.2456	17.4084	23.3167	9.50899	11.8644	0.311831	6.98	0	9.64535
cTel7X.1	chrX	1315	1935	+	No	-0.289814	0	0	0	No	ARM	199	199	57.3015	0	0	0	0	0	0	0	0	0
D1005.1	chrX	1479534	1484393	+	No	-0.420643	0	0	879	YES	ARM	430	364	48.3821	27.3267	35.5417	40.8692	52.7577	107.984	3.03363	4.58	0	86.4915
D1005.2	chrX	1459092	1462788	+	No	-0.360444	0	0	0	No	ARM	879	435	66.3137	17.4773	7.79495	7.0629	2.16405	0.0954866	0.0845582	0	0	1.05308
D1005.3	chrX	1452689	1454023	-	No	-0.221959	0	0	98	No	ARM	53	49	17.5472	8.03525	42.2104	14.0845	7.77456	7.46876	3.88349	2.32	1.19	922.229
D1005.4	chrX	1484790	1485702	-	No	-0.313413	0	0	0	No	ARM	349	349	47.1231	3.10072	6.6393	11.9339	9.88713	0.0938989	0.030379	5.02	0	0
D1005.5	chrX	1470992	1472885	-	No	-0.555326	133	0	174	No	ARM	506	506	33.451	0	0	0	0	0	0	0	0	0
D1005.6	chrX	1463109	1464415	-	No	-0.363648	0	0	0	No	ARM	762	762	31.0735	0	2.92244	0	0	0	0	0	0	0.792625
D1025.1	chrX	14520692	14522630	+	No	-0.354024	38	0	0	No	ARM	294	294	11.519	10.7282	5.84315	4.55049	3.28346	3.21689	0.786175	6.31	1.32	59.9593
D1025.10	chrX	14516782	14519005	+	No	-0.39736	0	0	0	No	ARM	662	662	16.5725	6.3333	16.2553	10.443	8.7131	3.0754	1.15808	0	0	18.8467
D1025.11	chrX	14526038	14526465	-	No	-0.211837	0	0	49	No	ARM	43	43	5.11628	0	0	0	0	0	0	0	0	0
D1025.2	chrX	14514045	14515011	-	No	-0.258735	0	0	0	No	ARM	385	385	7.16104	18.006	106.533	117.834	86.4876	3.39481	2.90344	9.02	0	4.64057
D1025.3	chrX	14511177	14514027	-	No	-0.294227	0	0	0	No	ARM	1124	1124	29.2206	2.53177	1.64008	1.65569	1.42358	0.816944	0.0432649	0	0	3.81404
D1025.4	chrX	14529714	14530139	-	No	-0.260952	72	0	57	No	ARM	42	42	0.47619	0	167.868	82.6883	69.1434	1.29777	0.837545	2.14	4.99	43.0591
D1025.6	chrX	14523504	14523927	+	No	-0.22619	70	0	0	No	ARM	42	42	42.3571	0	23.5899	26.688	26.7342	0	0.0324752	1.78	0	10.781
D1025.7	chrX	14527100	14527512	-	No	-0.2395	100	0	0	No	ARM	46	46	1.08696	0	30.8803	28.6106	31.3889	0.623456	0.157181	0	0	19.7514
D1025.8	chrX	14524687	14525111	-	No	-0.209457	74	0	0	No	ARM	46	46	1.08696	0	82.8632	39.5512	38.9838	0.267614	0.0931164	0	0	256.768
D1025.9	chrX	14528646	14529004	+	No	-0.280478	46	0	0	No	ARM	46	46	10.6957	0	20.0162	25.953	30.3441	0.117681	0.0471779	0	0	12.7828
D1037.1	chrI	3684804	3690157	+	No	-0.513676	583	55	193	No	ARM	940	429	155.139	14.0867	7.63058	6.40698	10.6156	43.9185	10.4291	1.7	1.2	16.0175
D1037.2	chrI	3667126	3671705	-	No	-0.294585	0	0	0	No	ARM	871	318	39.9564	7.954	22.0313	17.1962	11.5402	0.825031	0.712862	5.49	0	0.626342
D1037.3	chrI	3680180	3680947	-	YES	-0.176857	0	0	0	No	ARM	49	49	15.551	171.213	321.701	376.59	221.703	21.8262	32.9108	5914.27	4.97	136.72
D1037.4	chrI	3682875	3684121	-	No	-0.264936	0	0	113	No	ARM	59	47	30.2373	42.6338	24.611	26.9133	35.8646	217.907	56.9509	29.12	4.09	554.007
D1037.5	chrI	3690147	3694017	-	No	-0.510896	274	0	236	No	ARM	539	539	50.7143	0	0	2.27263	2.68776	0.779639	30.2823	0	0	0
D1043.1	chrII	11582781	11588468	+	No	-0.506775	411	0	438	No	ARM	766	676	69.4086	31.0757	12.5874	15.9307	29.5597	72.3447	16.2362	1.01	0	3.24314
D1065.1	chrV	4073739	4077533	+	No	-0.37362	0	0	654	No	ARM	590	590	44.0989	0.355401	0.829399	0	0.280102	0.0176379	0.00364261	0	0	0.283319
D1065.2	chrV	4062481	4068558	+	No	-0.515707	1284	1379	1694	No	ARM	4663	4663	41.5664	0	1.23751	0.418282	0	0	0	0	0	0
D1065.3	chrV	4059816	4062078	-	No	-0.293968	0	0	403	No	ARM	528	528	35.3561	0	0	0.240982	0	0.146046	15.7444	0	0	0
D1065.4	chrV	4069408	4071527	-	No	-0.27387	0	0	0	No	ARM	1030	1030	34.9612	0	1.10461	0	0	0	0	0	0	2.30999
D1065.5	chrV	4078045	4079798	-	No	-0.299594	0	0	185	No	ARM	737	737	56.7517	0	0	0.426724	0.426724	0	0	0	0	0
D1069.1	chrII	340538	342473	+	No	-0.329772	0	0	34	No	ARM	999	999	19.1431	1.3665	2.47283	0.606827	0	0.0360338	0.050089	0	0	16.8038
D1069.2	chrII	337338	339248	+	No	-0.362223	74	0	252	No	ARM	611	611	39.0455	84.4635	6.81682	6.42951	2.62277	5.52475	3.3739	0	0	0
D1069.3	chrII	342136	347865	-	No	-0.452519	0	1570	1542	YES	ARM	1114	644	609.118	22.3084	15.7231	13.6101	21.5075	19.9819	5.8591	0	0	7.71192
D1069.4	chrII	348241	350587	-	No	-0.433478	0	285	621	No	ARM	393	393	22.84	2.70644	3.18626	1.06901	2.16683	2.45238	0.113263	0	0	57.2293
D2045.1	chrIII	10461291	10467953	+	No	-0.38137	82	0	1313	YES	ARM	1223	235	72.5392	71.0585	38.5732	46.6299	43.849	107.292	46.237	11.21	2.19	103.886
D2045.2	chrIII	10452583	10460453	-	No	-0.386061	123	182	269	No	ARM	395	395	73.2874	20.807	14.014	14.2763	19.7869	71.8627	18.6032	0	0	18.9732
D2045.5	chrIII	10467962	10469406	-	No	-0.402895	0	0	48	No	ARM	287	287	11.9582	0	0	0.378843	0.579265	0.813312	40.924	0	0	1.32953
D2045.6	chrIII	10471139	10475503	+	YES	-0.288282	0	198	1072	YES	ARM	522	514	89.8638	98.6739	21.4466	23.2189	32.9434	114.47	55.2368	1.65	0	43.4667
D2045.7	chrIII	10479786	10482047	+	No	-0.346206	0	0	338	No	ARM	538	63	29.3358	8.75866	8.21264	5.35052	4.70664	3.34189	16.5161	0	0	0.900608
D2045.8	chrIII	10482229	10483830	+	No	-0.289636	0	0	0	No	ARM	449	77	49.657	6.29843	13.8983	16.4032	8.19638	0.0722542	0.332723	5.47	0	0.582806
D2045.9	chrIII	10475872	10479688	+	No	-0.510196	0	0	433	No	ARM	672	672	31.8416	28.1174	10.2986	8.81469	5.4405	3.16279	1.5361	0	0	8.72066
D2062.1	chrII	2631470	2633222	+	No	-0.374131	0	0	411	No	ARM	838	838	23.0612	0	0	4.05153	4.83166	0.0344238	20.3142	0	0	0
D2062.10	chrII	2606778	2608563	-	No	-0.416527	0	40	311	No	ARM	515	245	29.5262	0	0.558005	0	0	0	0	0	0	0
D2062.12	chrII	2625134	2627075	+	No	-0.481075	0	0	0	No	ARM	231	213	34.3729	7.91492	4.12883	3.7434	1.98968	0.215806	0.291417	0	0	11.62
D2062.13	chrII	2612577	2614035	+	No	-0.368125	0	0	428	No	ARM	842	842	33.9893	0	0	0.727676	2.7125	0	5.00243	0	0	0
D2062.2	chrII	2629574	2631236	+	No	-0.241909	0	342	0	No	ARM	569	569	43.1556	0	0.510803	0	0	0	0.0277438	0	0	0
D2062.3	chrII	2627753	2629201	+	No	-0.399911	0	148	0	No	ARM	205	190	14.9268	0	0	0	0	0	0.00443176	0	0	0
D2062.4	chrII	2623927	2624535	+	No	-0.296015	0	90	0	No	ARM	97	66	114.68	0	0	0	2.83546	0	25.1265	0	0	0
D2062.5	chrII	2622667	2623431	+	No	-0.346061	0	128	0	No	ARM	135	66	89.7333	0	0	0	0	0	2.85385	0	0	0
D2062.8	chrII	2610866	2612364	+	No	-0.306989	0	0	369	No	ARM	274	274	65.9083	0.489466	0	0	0	0	0.00978181	0	0	0
D2062.9	chrII	2603212	2605424	-	No	-0.372086	122	0	357	No	ARM	1078	1078	20.0417	0	0.373868	0	0	0	0	0	0	0
D2063.1	chrV	4327115	4328812	+	No	-0.340583	0	0	0	No	ARM	490	72	18.1837	37.6781	16.1289	4.36388	1.28759	0.0256534	0.0789438	0	0	0.194565
D2063.2	chrV	4329024	4332536	-	No	-0.415107	0	0	517	No	ARM	426	299	31.9648	0.220678	0	0.508678	0.469563	0.0220803	0.184617	0	0	0.283671
D2063.3	chrV	4338862	4341296	-	YES	-0.70376	810	0	878	YES	ARM	763	750	114.207	39.4136	44.0365	68.4458	66.4514	157.958	62.2873	10.78	0	51.6223
D2063.4	chrV	4336674	4338912	+	No	-0.503095	148	0	682	No	ARM	823	461	25.6748	1.2271	0	2.30868	5.90876	0.321074	62.6741	0	0	0
DC2.1	chrV	219932	222777	+	No	-0.436256	157	195	1034	No	ARM	853	731	47.0094	0	0	0	0	0.00897847	0	0	0	0
DC2.2	chrV	217154	219474	+	No	-0.332448	0	0	314	No	ARM	654	654	62.2075	0	0.746484	0	0	0	0.00412524	0	0	0
DC2.3	chrV	204380	209760	+	YES	-0.683793	901	172	1881	No	ARM	1350	1083	228.499	38.141	36.2134	50.7023	39.9299	30.5126	7.91867	10.61	0	111.803
DC2.5	chrV	210151	212714	-	No	-0.332549	0	116	569	No	ARM	711	711	36.0426	7.60445	11.4546	13.904	7.5839	0.583611	0.531293	0	0	18.6199
DC2.6	chrV	223028	226948	-	No	-0.37999	51	108	819	No	ARM	1388	1000	48.2986	0	0	0	0	0	0	0	0	0
DC2.7	chrV	227443	234673	-	No	-0.366703	0	298	1540	No	ARM	1666	667	80.3551	18.6773	0.355182	0	1.10309	1.54554	0.00326033	0	0	0
DC2.8	chrV	201596	204280	+	No	-0.356044	104	289	1012	No	ARM	1113	1113	126.954	17.6271	4.17731	5.87018	10.9657	44.5658	10.6395	3.26	0	465.677
E_BE45912.2	chrIII	1028791	1031145	-	No	-0.466036	0	0	479	No	ARM	825	722	54.4	1.83494	1.2801	2.05219	2.87944	9.77333	2.91795	0	0	8.95152
E01A2.1	chrI	4139515	4142821	+	No	-0.362278	0	0	177	No	ARM	1066	255	44.7777	42.3484	25.4433	23.4788	30.7643	120.818	24.0039	0	0	45.4484
E01A2.10	chrI	4145277	4147138	-	No	-0.369427	0	0	146	No	ARM	349	143	53.7431	1.59718	25.9455	22.441	20.0072	0.234994	0.130383	34.82	0	3.27787
E01A2.2	chrI	4132501	4135418	+	No	-0.342596	0	0	430	No	ARM	175	47	54.0714	152.221	44.3002	59.757	70.596	179.936	52.0661	2.93	0	26.0084
E01A2.3	chrI	4126057	4129312	+	No	-0.374465	0	0	315	No	ARM	1753	1753	46.2864	13.7026	6.78694	4.15103	2.27602	0.488351	0.397963	0	0	5.29901
E01A2.4	chrI	4129565	4132294	-	No	-0.303339	0	0	0	YES	ARM	800	800	73.0863	35.354	15.3806	21.4352	30.5243	108.225	25.8467	7.72	1.37	1.93187
E01A2.5	chrI	4135241	4137076	-	No	-0.524107	226	0	311	No	ARM	383	383	27.287	12.2825	7.19516	16.3254	15.8786	55.8239	11.9054	0	0	10.2017
E01A2.6	chrI	4137157	4139025	-	No	-0.324312	0	0	312	No	ARM	253	253	15.7043	83.78	25.9693	30.5856	46.4884	305.338	55.9171	69.83	10.67	455.668
E01A2.7	chrI	4142284	4144585	-	No	-0.458404	232	0	466	No	ARM	513	513	19.9961	4.1645	11.2849	12.8862	20.7744	0.130037	0.214624	0	0	0
E01A2.8	chrI	4147246	4148257	-	No	-0.371135	0	0	0	No	ARM	392	392	23.324	6.057	2.10032	1.17596	0	0.0567696	0	0	0	0
E01B7.1	chrV	17924889	17934201	+	No	-0.444203	79	481	1346	YES	ARM	967	306	668.405	16.3735	10.5085	6.38786	7.80995	18.0069	3.29865	0	1.11	50.9042
E01B7.2	chrV	17921757	17924164	+	No	-0.359366	0	145	978	YES	ARM	930	766	559.762	50.6274	26.8203	38.4607	44.6656	79.2735	16.6121	1.95	1.28	3.05765
E01F3.1	chrII	14949460	14952924	+	No	-0.384922	413	1353	539	YES	ARM	6674	357	84.4499	8.78101	15.7764	4.70299	2.43761	3.33057	0.22589	0	0	115.286
E01G4.1	chrII	13443114	13447525	-	YES	-0.636148	778	252	1278	No	ARM	1222	1222	249.036	38.7937	18.8707	15.5097	19.3334	69.3421	8.47422	0	0	43.3301
E01G4.3	chrII	13460920	13462000	-	No	-0.273285	0	0	47	No	ARM	242	242	54.4444	71.8481	55.4441	87.2497	48.0275	87.7473	28.4753	132.96	9.5	227.802
E01G4.4	chrII	13448764	13460572	-	YES	-0.524964	998	1750	3739	No	ARM	4976	1787	304.986	56.5573	23.5901	27.8336	32.1102	72.1547	21.38	4.63	0	85.9865
E01G4.5	chrII	13472360	13473853	+	No	-0.233167	0	0	0	No	ARM	48	48	6.5	13.1487	3.21294	0	2.06541	6.52526	0.00819688	1.01	0	0.807414
E01G4.6	chrII	13482332	13486105	+	No	-0.375946	196	0	391	No	ARM	501	501	4.60279	0.33201	2.12797	44.2488	11.614	1.17145	0.150514	0	0	9.49969
E01G4.7	chrII	13477400	13478859	+	No	-0.342455	0	0	41	No	ARM	310	310	16.3065	18.4772	11.4272	7.98533	7.09532	3.47569	1.44097	3.42	0	0
E02H4.1	chrX	14271888	14276970	+	No	-0.315477	0	295	89	No	ARM	751	518	56.0959	1.91999	3.99658	1.54144	0.246827	0.020139	0.00501974	0	0	0.385114
E02H4.2	chrX	14278388	14281529	-	No	-0.347091	0	75	0	No	ARM	796	429	31.1922	0	0.21659	0.24645	1.1242	1.07802	0.959706	0	0	3.165
E02H4.3	chrX	14284685	14293923	-	No	-0.349858	0	30	885	YES	ARM	4306	4306	19.6353	28.9997	22.7297	12.8853	9.4419	7.75076	0.321627	1.15	0	90.6924
E02H4.4	chrX	14257899	14262366	+	No	-0.544959	736	99	286	No	ARM	1030	1030	29.3835	10.9985	7.11658	2.06751	0.532788	0.0218336	0.0278838	0	0	0
E02H4.5	chrX	14253969	14255062	-	No	-0.260886	0	0	0	No	ARM	210	210	74.9796	0	1.21637	2.86149	1.26343	0	0.00761211	1.47	0	0
E02H4.6	chrX	14250440	14252067	-	No	-0.287661	0	38	218	No	ARM	222	168	8.63964	21.5718	0	2.95477	12.9458	46.6384	0.611968	0	0	0
E02H4.7	chrX	14256201	14257353	+	No	-0.299621	0	0	0	No	ARM	386	66	10.6321	7.17246	22.5449	64.5603	78.5319	0.0635736	0.0371932	0	0	0
E02H4.8	chrX	14262732	14263504	-	No	-0.24338	0	0	0	No	ARM	129	129	19.7519	0	0	0	0	0	0	0	0	0
E02H9.1	chrIII	2468475	2469433	+	No	-0.286297	0	0	436	No	ARM	465	465	22.0796	0	0	0.928585	0	0.246959	0.173765	0	0	0
E02H9.2	chrIII	2465463	2466790	+	No	-0.297	0	62	303	No	ARM	316	316	16.9583	1.83771	2.91528	6.85327	2.49532	0.375234	0.223916	6.84	0	0
E02H9.3	chrIII	2461898	2465068	+	No	-0.365279	0	765	651	No	ARM	850	129	74.3556	4.38665	6.54027	21.0927	18.3451	18.1372	5.29354	4.01	0	2.04337
E02H9.4	chrIII	2456169	2457754	+	No	-0.451819	0	0	378	No	ARM	537	403	36.2449	0.782292	3.316	10.2685	4.56633	0.0961986	0.242873	0	0	0
E02H9.5	chrIII	2446212	2448633	+	No	-0.408306	0	72	252	No	ARM	599	599	20.2	0.832713	2.53905	3.55375	1.50183	0.278091	0.157904	0	0	0.394188
E02H9.6	chrIII	2436094	2442318	+	No	-0.338775	1280	681	2344	No	ARM	1594	471	59.0476	0.348254	0	0	0	0	0	0	0	4.14342
E02H9.7	chrIII	2445212	2446132	-	No	-0.279553	0	66	756	No	ARM	454	454	11.6432	0	0	4.43136	16.3184	9.588	1.73537	0	0	0
E02H9.8	chrIII	2449372	2454939	-	No	-0.452257	267	223	2289	No	ARM	910	393	129.161	1.42986	8.1621	5.89868	5.05509	0.296109	0.283715	4.82	0	0.203448
E02H9.9	chrIII	2467272	2468292	-	No	-0.426652	121	0	548	No	ARM	440	440	22.3265	0	0	2.03471	1.87825	0.166913	0.188329	0	0	0
E03A3.10	chrIII	4049472	4051246	+	YES	-0.454258	357	0	248	No	ARM	1159	1159	33.0155	19.4622	1.42391	0.816139	0.961758	0.0881104	0.14992	0	0	0
E03A3.2	chrIII	4052776	4057951	-	No	-0.437131	159	99	477	No	ARM	704	350	152.554	13.5886	10.5014	14.7803	14.4558	39.2162	12.1792	2.18	0	6.44122
E03A3.5	chrIII	4060565	4062797	+	No	-0.402778	0	0	501	No	ARM	991	991	10.5247	0	0	0	0	0.0983987	0.0615297	0	0	0
E03A3.6	chrIII	4078415	4082656	+	No	-0.349497	0	42	138	No	ARM	2524	1525	53.619	3.08043	9.61736	2.81604	1.65544	0.0613824	0.0773505	0	0	218.261
E03D2.1	chrV	4236403	4238088	+	No	-0.301078	0	0	230	No	ARM	653	653	15.5054	4.65588	46.0113	20.332	8.08366	0.30274	0.0605191	68.39	17.15	3863.09
E03D2.2	chrV	4219628	4222182	+	No	-0.385342	59	58	615	No	ARM	1143	644	69.0954	4.18802	39.7729	19.2227	14.9565	0.108785	3.82629	6.27	0	247.62
E03D2.3	chrV	4239135	4240378	-	No	-0.23322	0	0	0	No	ARM	197	50	47.8376	0	0.365985	0	0	0	0	0	0	0
E03D2.4	chrV	4240937	4242517	-	No	-0.264995	0	0	124	No	ARM	410	410	36.7366	1.04776	1.30585	0.537869	0	0	0	0	0	0.894973
E03G2.1	chrX	15926478	15928417	+	No	-0.2898	0	0	346	No	ARM	701	701	48.6878	0.480123	0.571202	0	0	0	0	0	0	0
E03G2.2	chrX	15929883	15939254	-	No	-0.460004	464	0	1747	No	ARM	1079	1079	44.5822	6.33125	15.557	12.2234	8.95627	0.108045	0.0751244	1.27	0	0.489305
E03G2.3	chrX	15943938	15948881	+	No	-0.503903	1288	3	976	No	ARM	1393	1393	34.7989	30.7333	82.2836	35.2458	18.7398	0.252095	0.201086	0	0	0
E03G2.4	chrX	15952303	15954493	+	No	-0.401147	0	0	0	No	ARM	516	516	8.28876	1.34219	1.9017	2.81884	1.15759	0.167409	0.210737	0	0	0.310409
E03H4.10	chrI	12430018	12431464	-	No	-0.295167	0	0	0	No	ARM	54	42	12.619	20.4086	21.3066	4.40282	0.378203	0.0511703	0.0935933	15.72	0	31.9977
E03H4.11	chrI	12433050	12434876	+	No	-0.310682	0	0	0	No	ARM	326	44	12.4082	0	0	0	0	0.0719521	0.0450729	0	0	0
E03H4.12	chrI	12435715	12437275	+	No	-0.456483	0	79	115	No	ARM	220	203	40.1569	0	0	0	0	0	0	0	0	0
E03H4.13	chrI	12439925	12441243	-	No	-0.245625	0	0	0	No	ARM	72	72	21.6481	0	0	0	0	0	0	0	0	0
E03H4.2	chrI	12403099	12404479	-	No	-0.376448	0	0	311	No	ARM	259	259	18.7645	0	1.14018	0	0	0	0	0	0	0
E03H4.3	chrI	12405514	12406936	-	No	-0.327299	0	69	0	No	ARM	301	301	27.6154	0	3.05935	0	0	0	0	0	0	0
E03H4.4	chrI	12407553	12411425	+	No	-0.576964	237	0	282	No	ARM	490	411	26.0286	0	0.150753	0.345627	0	0	0	0	0	0
E03H4.5	chrI	12413798	12415735	+	No	-0.362317	0	0	293	No	ARM	247	60	16.1132	0	0.368357	0	0	0.00585542	0	0	0	0
E03H4.6	chrI	12417375	12418790	+	No	-0.266333	0	0	467	No	ARM	59	51	68.4706	0	0	0	0	0	0	0	0	0
E03H4.7	chrI	12421228	12424401	+	No	-0.465527	56	0	0	No	ARM	416	275	42.2083	0	0.584488	0.422084	0	0	0	0	0	13.4228
E03H4.8	chrI	12424544	12426756	-	No	-0.334033	21	0	96	YES	ARM	425	425	30.7153	4.61276	25.4208	13.871	6.87633	1.65528	0.351344	0	0	58.5551
E04A4.1	chrIV	4737549	4738726	+	No	-0.174148	0	0	0	No	ARM	169	169	19.6746	18.2479	1.28968	0	2.44256	0.206727	0	0	0	0
E04A4.2	chrIV	4734196	4735204	+	No	-0.339132	0	0	466	No	ARM	582	582	30.0361	7.32593	0	0	2.31183	0.0557229	0	0	0	0
E04A4.3	chrIV	4730627	4731213	+	No	-0.197385	0	0	0	No	ARM	52	52	74.0385	0	0	0	0	0	0	0	0	0
E04A4.4	chrIV	4739253	4744261	-	No	-0.415329	144	34	1334	No	ARM	768	213	128.251	20.8882	28.4085	43.086	46.693	107.013	28.9739	3.01	0	3.48444
E04A4.5	chrIV	4744341	4745486	-	No	-0.263292	0	0	264	No	ARM	57	48	33.0357	153.128	163.327	191.484	151.681	234.47	89.4809	42.79	2.36	146.374
E04A4.6	chrIV	4745785	4747824	-	No	-0.472864	125	0	45	No	ARM	382	382	51.434	5.08706	0.984279	0	0	0.788887	0.115457	0	0	4.64904
E04A4.7	chrIV	4747892	4749004	-	No	-0.307149	0	0	0	YES	ARM	518	518	10.8243	266.478	790.251	683.386	556.325	1983.94	592.895	4812.51	297.78	839.955
E04A4.8	chrIV	4749003	4749774	-	No	-0.133146	0	0	0	No	ARM	48	48	24.375	366.433	1499.6	1605	875.412	5741.03	2609.46	11360.2	55.23	0
EGAP7.1	chrX	2144595	2145641	-	No	-0.237	0	0	0	No	ARM	82	82	21.5122	122.913	20.8014	50.3886	3.70943	0.0156916	0	0	0	0
F01D5.1	chrII	13996881	13997522	-	No	-0.229267	0	0	0	No	ARM	60	60	2.83333	6.01017	46.9005	50.4011	13.5304	1.88931	1.90556	64.86	0	2.43639
F01D5.10	chrII	14017890	14020871	-	No	-0.306983	0	659	156	No	ARM	642	642	126.829	8.48187	3.18872	4.03071	0.868961	0.100701	0.0385331	0	0	0.535141
F01D5.11	chrII	13995326	13995802	+	No	-0.152045	0	0	0	No	ARM	44	44	0.454545	0	0	0	0	0	0	0	0	0
F01D5.2	chrII	13998422	13998882	-	No	-0.144627	0	0	0	No	ARM	51	51	14.3137	0	2.13141	1.02167	2.76614	0.237211	0.111126	0	0	0
F01D5.3	chrII	13998978	13999991	-	No	-0.522508	202	17	236	No	ARM	425	425	21.377	1.81407	22.5087	21.0843	25.7368	0.85214	0.246452	0	0	0
F01D5.4	chrII	14000305	14000961	-	No	-0.1213	50	79	0	No	ARM	50	50	3.2	0	1.30819	0.689543	0.812574	0	0.0207275	0	0	0
F01D5.5	chrII	14001610	14002226	-	No	-0.280729	0	0	0	No	ARM	48	48	2.29167	3.29446	20.6522	29.0538	9.80691	0.951061	1.14955	46.89	0	1.76349
F01D5.6	chrII	14006436	14008502	+	No	-0.468653	0	0	80	No	ARM	331	331	14.3934	60.6074	16.166	10.4514	2.15805	0.0495915	0	0	0	0
F01D5.7	chrII	14008591	14010509	+	No	-0.411319	0	0	0	No	ARM	343	47	17.1316	0.603667	0.490074	0	1.23465	0	3.09804	0	0	0
F01D5.8	chrII	14011127	14013750	+	No	-0.398219	0	0	0	No	ARM	1049	1049	6.90372	0.707704	1.29736	4.48133	3.64964	0.278821	56.5338	7.33	0	3.1282
F01D5.9	chrII	14013746	14016890	-	No	-0.435167	0	133	527	No	ARM	650	460	113.83	2.53901	8.10291	11.0808	2.38414	0.307731	0.266846	4.59	0	1.79222
F01G12.1	chrX	16395003	16396877	+	No	-0.273799	0	105	114	No	ARM	578	578	78.4528	0	0	0.453706	0	0	0	0	0	0
F01G12.2	chrX	16377933	16379645	+	No	-0.340746	0	0	0	No	ARM	658	461	24.3936	17.0425	12.9087	15.2234	10.6991	13.9471	3.31875	20.9	0	30.423
F01G12.5	chrX	16380375	16389297	-	No	-0.379298	0	0	704	YES	ARM	538	258	50.7208	306.591	383.951	283.084	235.396	29.7326	17.4773	1.44	1.02	60.4354
F01G12.6	chrX	16399137	16403116	-	No	-0.362044	0	40	1014	No	ARM	1168	1168	15.7126	33.89	32.0657	22.1411	25.351	18.9649	1.23941	4.53	0	33.4883
F02C9.1	chrV	3138745	3139167	+	No	-0.180385	0	0	0	No	ARM	52	52	10.6538	0	0	2.24203	2.24203	0.0528646	48.4857	0	0	0
F02C9.2	chrV	3133702	3137380	+	No	-0.314753	0	0	63	No	ARM	446	446	39.9259	0	0	0	0	0.00308416	0	0	0	0
F02C9.3	chrV	3129122	3133404	+	No	-0.579607	64	0	205	No	ARM	361	206	28.5818	0.398071	1.36196	0.294109	0.293807	0.0576564	0.00302995	0	0	0.655652
F02C9.4	chrV	3137469	3138208	-	No	-0.170316	0	0	0	No	ARM	57	57	35.6491	0	0.575863	1.96576	3.98449	0.368924	99.6615	0	0	0
F02E11.1	chrII	3279092	3281710	+	No	-0.522112	0	0	148	No	ARM	249	206	18.6939	0	0	0.663748	1.23756	0.14858	39.7306	0	0	0
F02E11.2	chrII	3262832	3264287	+	No	-0.36889	0	41	26	No	ARM	1142	1142	39.1326	0	16.415	6.99187	0	2.30269	0.0320859	0	0	35.5368
F02E11.3	chrII	3272352	3275054	-	No	-0.319448	0	120	0	No	ARM	768	768	33.3182	4.82555	0.433438	0	1.17103	0.431413	0.0030372	0	0	0.81762
F02E11.4	chrII	3276259	3277309	-	No	-0.295301	0	0	75	No	ARM	405	405	111.139	2.02061	0	0	2.33374	0.823741	0	0	0	0
F02E11.5	chrII	3283665	3284661	-	No	-0.336	0	0	0	No	ARM	298	298	9.14765	0	0	0	0	0	0.108458	0	0	0
F02E11.7	chrII	3270921	3271435	+	No	-0.3674	208	520	39	No	ARM	3406	1958	110.5	0	6.55166	3.41201	2.87505	0.873521	0.405287	0	0	160.367
F02G3.1	chrX	695065	702537	+	No	-0.348226	0	58	995	No	ARM	2178	681	106.388	55.3154	18.7762	5.67001	4.24592	0.055233	0.0175603	0	2.42	279.915
F02H6.1	chrIV	14199237	14201755	+	No	-0.272269	0	43	124	No	ARM	312	93	39.046	0	0	0.256986	0.562079	3.87456	0.00753127	0	0	0
F02H6.2	chrIV	14196423	14198799	+	No	-0.313	0	0	166	No	ARM	295	83	14.1407	14.9319	1.86517	0.912095	5.32399	44.167	0.189658	0	0	1.1003
F02H6.3	chrIV	14203419	14205331	+	No	-0.305619	0	0	0	No	ARM	320	320	17.8531	30.3823	1.16237	1.55523	7.99903	26.4713	0.0516646	0	0	0
F02H6.4	chrIV	14216069	14219283	+	No	-0.378501	0	421	358	No	ARM	1366	1366	18.8163	1.59699	0.672645	0.960128	4.1128	45.9026	0.251346	0	0	0
F02H6.5	chrIV	14220953	14224332	+	No	-0.31081	0	0	0	No	ARM	921	310	51.0194	20.8457	33.7691	48.4425	31.859	1.70962	0.108927	3.28	0	20.6578
F02H6.6	chrIV	14229248	14230944	-	No	-0.298079	0	0	1696	No	ARM	352	151	24.2067	0	0	0	0	0.018034	0	0	0	0
F02H6.7	chrIV	14225892	14228633	-	No	-0.287496	0	60	0	No	ARM	647	647	39.4544	0	0	0	0	0	0	0	0	0
F02H6.71	chrIV	14207538	14208016	+	No	-0.242	0	0	0	No	ARM	130	130	20.9846	6.77524	0	0	0	0.209082	0	0	0	0
F07A11.1	chrII	11588397	11591961	-	No	-0.442599	0	50	45	No	ARM	651	147	33.6007	1.14972	2.09278	0.243413	0.532392	0.548098	0.168663	0	0	0
F07A11.2	chrII	11592325	11596524	-	No	-0.322688	0	0	0	No	ARM	992	992	17.4884	60.8079	10.5737	32.5887	61.5662	696.495	83.8455	2.91	1.12	42.2369
F07A11.3	chrII	11596700	11599745	-	No	-0.301646	0	0	98	YES	ARM	181	181	8.97917	86.7619	27.829	25.4966	37.1627	101.53	23.5269	0	0	26.2461
F07A11.4	chrII	11603889	11611466	+	No	-0.373792	0	0	365	No	ARM	1750	120	41.4469	14.7034	22.9318	17.604	8.61303	1.14105	0.717117	2.18	0	26.4275
F07A11.5	chrII	11612019	11614330	+	No	-0.316888	0	0	0	No	ARM	609	609	20.6282	14.6668	22.0069	34.2121	31.8051	1.22706	2.779	4.27	0	22.5866
F07A11.6	chrII	11614571	11633545	-	No	-0.403093	192	118	1312	YES	ARM	4003	4003	23.2428	26.6863	21.1012	11.8407	8.99726	6.70444	0.489997	7.36	2.68	189.606
F07C6.1	chrIV	12793828	12796139	+	No	-0.383797	0	0	0	No	ARM	523	523	35.9317	11.4797	9.13399	13.3417	9.29906	0.850194	0.435165	7.81	0	0
F07C6.2	chrIV	12791146	12791784	+	No	-0.202567	0	0	231	No	ARM	67	67	3.13433	0	5.7719	12.2783	11.6438	0.577265	0.2031	4.48	0	0
F07C6.3	chrIV	12789208	12790383	+	No	-0.389548	0	0	143	No	ARM	235	135	24.4898	0	44.8413	13.4084	8.48313	0.201202	0.279734	0	0	3.27265
F07C6.4	chrIV	12805906	12830085	+	YES	-0.429563	964	559	2356	No	ARM	5601	785	506.334	38.7946	17.2023	12.1228	15.7988	25.0808	8.89248	0	1.81	45.2182
F07C6.6	chrIV	12792770	12793250	+	No	-0.13328	0	0	54	No	ARM	50	50	1.8	0	0	9.07356	4.37966	0.130772	0.0219236	0	0	0
F07D10.1	chrX	2241747	2242612	-	No	-0.243686	0	0	0	No	ARM	52	51	3.65385	392.118	1537.45	1242.49	491.123	148.121	180.301	1668.69	22.47	524.86
F07E5.1	chrII	2064466	2068976	+	YES	-0.46144	845	30	498	No	ARM	2966	2966	25.6662	5.33596	0	0.303198	0.663154	0.373158	0.00415265	0	0	0
F07E5.2	chrII	2051673	2052750	+	No	-0.188394	0	0	73	No	ARM	66	66	68.7879	33.2485	0.862263	0	3.8965	0.096354	0.00738249	0	0	0
F07E5.4	chrII	2050027	2051684	-	No	-0.277704	0	0	0	No	ARM	1345	1345	34.8446	0	0	0	0	0	0	0	0	0
F07E5.5	chrII	2053930	2059075	-	No	-0.382786	0	0	2271	No	ARM	1545	828	1345.35	18.6092	35.5864	30.7221	25.901	57.7008	20.7341	1.09	0	36.4674
F07E5.6	chrII	2059789	2063849	-	No	-0.358539	0	0	102	No	ARM	1326	432	38.3024	9.36999	0	0	0.32503	0.0752355	4.00438	0	0	0
F07E5.7	chrII	2070598	2071521	-	No	-0.253	2385	4864	0	No	ARM	54	48	32.913	0.5537	1.02957	0	0	0	0.0189458	0	0	0
F07E5.8	chrII	2072365	2075835	-	No	-0.420187	194	0	0	No	ARM	1141	1141	17.2585	0	0	0.364712	0.461544	0.0749795	22.2993	0	0	0
F07E5.9	chrII	2076160	2080531	-	No	-0.401711	0	0	1198	No	ARM	1476	1476	54.4231	0	0.744129	0	0	0.137612	0.0027027	2.78	0	0
F07G6.1	chrX	1729852	1731814	+	No	-0.378012	0	0	133	No	ARM	1206	1206	14.5017	0	0	0	0	0.0505616	0.007029	0	0	0
F07G6.10	chrX	1737903	1739224	+	No	-0.297243	0	0	478	No	ARM	860	860	33.3744	0	0	27.8916	44.117	0.196168	0.00773113	0	0	2.58652
F07G6.2	chrX	1727350	1728974	+	No	-0.352695	0	0	0	No	ARM	475	475	28.0606	0	0	0	0	0.0292102	0	0	0	0
F07G6.3	chrX	1723086	1724883	+	No	-0.349718	0	0	0	No	ARM	432	432	9.68056	0	0	0	0	0	0	0	0	0
F07G6.5	chrX	1706364	1706633	-	No	-0.212696	0	0	118	No	ARM	46	46	49.0435	0	0	0	0	0	0	0	0	0
F07G6.6	chrX	1710287	1711207	-	No	-0.246636	0	0	0	No	ARM	44	44	29.0455	2.07302	1.3211	0	0	0.0102943	0	0	0	0
F07G6.7	chrX	1716427	1718563	-	No	-0.500667	407	26	344	No	ARM	1075	1075	26.4307	2.17373	5.138	1.93684	0.483713	0.278899	0.0370674	6.54	0	0
F07G6.8	chrX	1720033	1720480	-	No	-0.16805	0	0	0	No	ARM	60	60	37.5667	0	0	0	0	0	0	0	0	0
F07G6.9	chrX	1714345	1715482	+	No	-0.297373	0	310	620	No	ARM	544	544	34.182	0	0	0	0	0	0	0	0	0
F08A7.1	chrIV	17440624	17442103	+	No	-0.307471	0	0	0	No	ARM	607	607	19.6872	0	5.87734	4.14687	1.88753	0.0619458	0.0774691	268.78	0	0
F08A8.1	chrI	12938543	12942212	+	No	-0.326638	0	46	328	No	ARM	574	431	30.686	27.4911	52.1715	48.325	19.1115	0.481503	0.395668	5.09	0	0
F08A8.2	chrI	12942268	12946574	+	No	-0.308399	0	106	408	No	ARM	883	666	35.9422	0.810024	21.4599	89.3172	12.8283	0.0633024	0.124514	0	0	0
F08A8.3	chrI	12946935	12952322	+	No	-0.355653	72	0	483	No	ARM	1168	1168	27.4924	0.292144	7.31411	12.7248	7.27575	0.0364637	0.292154	1.02	0	0
F08A8.4	chrI	12951068	12954004	+	No	-0.293797	0	0	474	No	ARM	458	458	18.2857	0	15.3919	26.955	13.4779	0.210863	0.135926	3.08	0	0
F08A8.5	chrI	12955326	12957891	-	No	-0.454813	0	318	38	No	ARM	314	192	66.3922	2.1619	0.849699	0	1.37551	0.229285	0.216969	0	0	0.819621
F08A8.6	chrI	12934755	12937241	+	No	-0.362121	0	0	308	No	ARM	1009	1009	16.8385	0	0.727976	0	0	0.0268942	0	0	0	0
F08A8.7	chrI	12958627	12959944	-	No	-0.215386	0	0	51	No	ARM	57	57	30.2105	8.2623	4.44862	23.3259	36.6287	111.761	37.447	1.16	0	10.4145
F08A8.8	chrI	12954000	12955205	-	No	-0.358577	0	155	93	No	ARM	267	267	38.037	0	0	1.86459	1.23999	0.8892	40.2608	0	0	0.457954
F08D12.1	chrII	2787485	2793950	+	No	-0.348733	0	1697	2379	YES	ARM	925	925	1229.96	42.751	34.6567	43.4825	42.0321	98.1825	37.0164	0	0	79.1797
F08D12.10	chrII	2772393	2773622	-	No	-0.1554	0	0	0	No	ARM	50	50	21.56	24.9528	0	0	1.67064	0.120617	0	0	0	0
F08D12.11	chrII	2773958	2775047	-	No	-0.183673	0	0	0	No	ARM	55	55	2.18182	7.41492	0	0	1.42868	0	0	0	0	0
F08D12.12	chrII	2783106	2787094	-	No	-0.460205	98	190	946	No	ARM	850	606	59.617	0	3.23231	0.239616	0.239616	0.12286	0.026218	0	0	3.6782
F08D12.2	chrII	2781659	2783091	+	No	-0.402774	52	0	437	No	ARM	483	483	44.1139	1.2576	15.2587	8.92151	4.85737	0	0.00554384	0	0	1.97028
F08D12.3	chrII	2779548	2780845	+	No	-0.421836	0	0	0	No	ARM	2340	391	35.4444	0.751354	12.2822	4.71155	4.26671	0.177437	0.00489331	0	0	30.1344
F08D12.4	chrII	2778222	2779287	+	No	-0.291239	0	0	0	No	ARM	109	109	23.08	0.680275	0	0	0	0	0	0	0	0
F08D12.6	chrII	2764968	2767235	+	No	-0.365184	0	60	318	No	ARM	721	721	12.9091	20.4319	0	0	1.31137	0	0	0	0	0.169414
F08D12.7	chrII	2767252	2769135	-	No	-0.413346	0	593	515	No	ARM	723	723	26.2414	7.73147	12.1239	10.4134	10.7772	0.111699	0.0377434	0	0	5.75731
F08D12.8	chrII	2769798	2770893	-	No	-0.282167	0	0	0	No	ARM	96	96	13.125	32.7554	0	0.830381	3.29495	0.0376059	0	0	0	0
F08D12.9	chrII	2771086	2772271	-	No	-0.186477	0	0	0	No	ARM	44	44	5.18182	10.5472	0	0	0.431569	0.0146958	0	0	0	0
F08E10.1	chrV	17470196	17471638	-	No	-0.315718	0	0	0	No	ARM	355	355	7.18592	0	0	0	0	0	0	0	0	0
F08E10.2	chrV	17476763	17478082	+	No	-0.350896	0	0	849	No	ARM	294	173	14.2139	0	0	0	0	0	0.00596948	0	0	0
F08E10.3	chrV	17473972	17475445	+	No	-0.414027	0	0	124	No	ARM	365	365	9.04348	0	0	0	0	0	0	0	0	0
F08E10.4	chrV	17478306	17479360	-	No	-0.215	0	0	0	No	ARM	48	48	0.208333	0	0	0	0	0	0.00441734	0	0	0
F08E10.5	chrV	17480824	17481829	-	No	-0.176409	0	0	321	No	ARM	66	66	5.21212	0	0	0	0	0	0	0	0	0
F08E10.6	chrV	17484018	17485152	-	No	-0.332691	0	0	0	No	ARM	123	123	3.55285	0	0	0	0	0	0	0	0	0
F08E10.7	chrV	17486404	17487301	+	No	-0.332511	0	0	107	No	ARM	80	45	13.1111	0	5.95899	0	0	0.0603173	0.0422221	0	0	0
F08G2.6	chrII	13835031	13835593	-	No	-0.172615	0	0	0	No	ARM	52	52	0.384615	0	0	0	6.26401	0.408086	95.717	0	0	0
F08G2.7	chrII	13836168	13841067	-	No	-0.368639	0	1540	840	No	ARM	1177	1177	84.9745	9.91277	3.19484	4.65385	3.26682	2.91992	0.127804	1.88	0	3.00965
F08G2.8	chrII	13852238	13855218	+	YES	-0.876576	763	0	966	No	ARM	846	846	51.5363	2.39597	7.42838	4.66078	0.531082	0.212161	0.231961	0	0	1.78796
F09B12.1	chrX	15101716	15107897	-	No	-0.360624	0	0	782	YES	ARM	1312	346	33.4709	58.4241	13.329	14.2492	2.20058	0.0260789	0.0423538	0	0	0.484437
F09B12.2	chrX	15097996	15100335	-	No	-0.346539	40	0	363	No	ARM	488	488	23.063	41.9972	12.2701	2.36826	3.07337	14.3411	0.504433	0	0	70.1205
F09B12.3	chrX	15095264	15097884	-	No	-0.328714	0	58	1663	No	ARM	319	49	29.8333	26.9353	230.508	173.509	35.5548	2.84576	1.29293	65.42	0	9.24947
F09B12.5	chrX	15084678	15088065	+	No	-0.420162	228	0	359	No	ARM	1066	973	30.7842	0.910082	0.631205	0.361786	0	0.0231329	0	0	0	3.3764
F09B12.6	chrX	15089326	15093515	+	No	-0.362248	0	178	0	No	ARM	1034	1034	25.9342	2.07423	3.8886	4.6103	3.25026	0.0757037	0.0842511	1.39	0	0
F09B12.7	chrX	15093592	15094879	-	No	-0.337787	0	0	202	No	ARM	1067	1067	32.3796	0	14.5064	12.6438	2.51379	0	0	0	0	0
F09C11.1	chrIV	543230	544086	-	No	-0.325905	0	60	130	No	ARM	221	179	111.317	0	0	0	0	0	0	0	0	0
F09C3.1	chrI	14263288	14271305	+	No	-0.609855	682	1191	2417	No	ARM	1176	1176	64.9821	15.1932	26.1058	19.7768	10.6606	2.71303	2.09601	3.19	0	89.6756
F09C3.2	chrI	14271882	14274193	-	No	-0.384734	0	0	637	No	ARM	590	590	24.904	1.26094	30.0557	9.33587	2.97249	0.144606	2.16353	8.17	2.04	296.278
F09C3.3	chrI	14285924	14287065	-	No	-0.201151	0	55	955	No	ARM	93	93	14.0538	5.81921	0	0	0.939733	0.0126546	0	0	0	0
F09C3.4	chrI	14287859	14295886	-	No	-0.529558	309	405	2274	No	ARM	5605	5605	23.0189	4.17629	0	0	1.09265	0	0	0	0	0.197087
F09C3.5	chrI	14283451	14285307	-	No	-0.361855	184	54	99	No	ARM	854	854	60.6464	6.40463	0.363793	0.417029	0.982874	0.453525	0	0	0	0.578479
F09C6.1	chrV	16887389	16888456	-	No	-0.277785	0	0	245	No	ARM	251	251	10.2112	0	0.739398	0	0	0	0	0	0	0.449422
F09C6.10	chrV	16915348	16916155	-	No	-0.334545	0	0	0	No	ARM	145	145	37.5724	0	0.834255	0	0	0.329538	0.147645	0	0	0
F09C6.11	chrV	16881936	16882287	-	No	-0.318724	0	0	0	No	ARM	58	58	10.9655	0	5.53805	0	0	0	0	0	0	0
F09C6.12	chrV	16882854	16883119	+	No	-0.325522	0	0	0	No	ARM	46	46	4.02174	1.9468	3.61993	15.1657	21.3411	0	0	0	0	0
F09C6.13	chrV	16885051	16885380	+	No	-0.361729	0	0	0	No	ARM	48	48	2.97872	0	0	0	0	0	0	0	2.85	0
F09C6.14	chrV	16880970	16881313	+	No	-0.219867	0	0	0	No	ARM	52	45	4.76923	0	0	4.00753	0	0	0	0	0	0
F09C6.15	chrV	16893716	16894084	+	No	-0.2102	0	0	0	No	ARM	50	50	7.4	0	0	0	0	0	0	0	0	0
F09C6.16	chrV	16907944	16909947	-	No	-0.399171	0	41	233	No	ARM	630	630	23.0541	0	0.363793	0	0	0	0	0	0	0
F09C6.2	chrV	16889263	16890664	+	No	-0.303818	0	0	75	No	ARM	411	411	24.0024	0.663265	1.767	1.76781	1.5589	0.193296	0.00261518	0	0	0.603426
F09C6.3	chrV	16878700	16880131	-	No	-0.26714	0	0	1317	No	ARM	271	221	46.9077	0	0	0.490858	0.490858	0	0	0	0	0
F09C6.4	chrV	16896334	16897705	+	No	-0.29833	1371	0	0	No	ARM	97	97	19.2062	0	0	0	0	0	5.47246	0	0	0
F09C6.5	chrV	16894206	16895530	-	No	-0.247509	1324	0	0	No	ARM	55	55	27.1277	0.556859	0	0	0	0.0453514	3.83183	0	0	0
F09C6.6	chrV	16898433	16899432	-	No	-0.27193	0	0	0	No	ARM	50	43	4.4	0	0.402341	0	0.54351	0	0	0	0	0
F09C6.7	chrV	16901191	16902803	-	No	-0.568611	144	0	202	No	ARM	296	296	12.6824	0	0	0.850821	0.850821	0	0	0	0	0
F09C6.8	chrV	16904888	16907263	+	No	-0.373762	0	235	695	No	ARM	451	105	36.1153	0	0	0	0	0.01586	0.00671101	0	0	0
F09C6.9	chrV	16912209	16915326	+	No	-0.685793	680	0	144	No	ARM	1041	1041	42.7426	3.53458	5.11773	3.63936	0.44743	0.5871	0.0305018	1.64	0	53.82
F09C8.1	chrX	16159349	16163477	-	No	-0.397679	109	0	311	No	ARM	1041	1041	21.2997	2.6439	31.8744	33.5973	25.4383	0.047481	0.0251551	2.93	0	0
F09C8.2	chrX	16140421	16146952	-	No	-0.447023	40	51	560	No	ARM	1399	530	12.5321	24.7519	15.5695	7.75252	7.04851	5.36799	0.925403	4.98	0	70.7524
F09D1.1	chrII	2565279	2575937	+	No	-0.419514	1629	3256	3294	YES	ARM	1937	1380	1452.64	50.4227	19.5464	28.4393	30.7808	61.7044	16.0328	0	0	8.21088
F09D12.1	chrIV	3441087	3441785	+	No	-0.557	0	0	0	No	ARM	154	154	1.62338	5.95253	291.938	189.194	58.3255	2.95236	2.81192	5.87	5.85	60.2261
F09D12.2	chrIV	3442299	3444198	-	No	-0.315395	0	0	0	No	ARM	253	43	36.186	0.454727	0	0	0.465014	0.0842384	0.031513	0	0	0
F09E10.1	chrX	1502874	1503214	+	No	-0.227557	0	0	34	No	ARM	61	61	6.98361	0	1.81802	1.48665	21.4262	0.393736	0	0	0	0
F09E10.11	chrX	1504125	1504836	-	No	-0.290788	0	0	0	No	ARM	52	52	10.0769	18.5789	532.821	173.701	221.111	35.099	4.99911	0	0	794.514
F09E10.3	chrX	1486496	1489324	+	No	-0.308983	0	0	0	No	ARM	762	580	72.2655	30.8905	71.2058	155.084	166.473	6.71551	3.84757	3.68	0	20.837
F09E10.5	chrX	1489713	1494351	-	No	-0.357903	0	0	551	No	ARM	1968	278	25.0755	1.13392	1.64165	0	0	0	0.00267028	0	0	0
F09E10.6	chrX	1494999	1497676	-	No	-0.364725	0	0	333	No	ARM	1049	357	64.5045	39.3401	6.89782	0	0.808571	0.0234226	0	0	0	8.32002
F09E10.7	chrX	1500172	1501832	-	No	-0.311546	0	0	357	No	ARM	915	915	14.8951	0.585644	14.7199	2.29171	6.7133	0.025635	0.0193902	5.13	0	18.8946
F09E10.8	chrX	1510466	1521482	-	No	-0.40869	0	227	627	No	ARM	5508	358	29.2824	33.946	14.2396	9.98322	7.93025	8.66549	0.707233	2.26	0	85.2604
F09E8.1	chrIV	13141360	13142330	-	No	-0.412673	0	0	0	No	ARM	104	104	13.6667	0.666162	0	0.573686	1.45741	0.099362	10.2405	0	0	0
F09E8.2	chrIV	13150393	13154424	-	No	-0.424128	182	0	1845	No	ARM	1204	878	213.627	25.7962	16.3388	17.6089	16.1447	16.807	5.64703	1.81	0	16.9635
F09E8.3	chrIV	13155203	13164028	+	YES	-0.598196	801	0	760	No	ARM	774	769	107.255	1.93766	2.20163	10.6066	17.5146	31.4847	10.6264	0	0	0.461648
F09E8.5	chrIV	13165491	13166731	+	No	-0.361785	0	0	0	No	ARM	479	479	18.1884	0	2.92888	3.05686	0.644061	0.0442477	0.044116	0	0	8.17445
F09E8.6	chrIV	13170519	13173670	+	No	-0.341514	0	0	154	No	ARM	614	278	139.035	4.81021	4.98469	1.61147	2.08683	0.916361	0.076947	0	2.43	0.341986
F09E8.7	chrIV	13174146	13179359	-	No	-0.36748	0	118	1015	No	ARM	1303	1303	115.082	6.28703	11.3045	5.85369	2.44543	0.100819	0.0209504	0	0	151.07
F09E8.8	chrIV	13149556	13150401	+	No	-0.315835	0	0	139	No	ARM	606	606	15.9356	2.01521	12.1372	5.84745	7.59159	0.348926	2.5511	0	0	30.2433
F10C5.1	chrIII	475450	482321	+	YES	-0.537872	880	211	1517	YES	ARM	1917	1917	108.237	42.0897	10.568	17.5635	23.1339	49.0319	11.7364	0	0	13.1982
F10C5.2	chrIII	472299	475353	+	No	-0.515037	370	96	7	No	ARM	464	464	74.5532	65.3088	18.2248	21.7757	45.2195	184.597	46.5879	1.7	0	7.73255
F10D7.1	chrX	17359695	17364690	+	No	-0.325181	0	63	0	No	ARM	762	381	31.7776	0.747697	3.14707	1.36647	0.956537	0.00306346	0.0125361	0	0	56.1055
F10D7.2	chrX	17364571	17368570	-	No	-0.313239	0	43	125	No	ARM	620	335	37.429	38.1597	8.95271	7.27795	4.1113	4.16131	0.342509	0	0	4.36739
F10D7.3	chrX	17372239	17374803	-	No	-0.339704	0	0	574	No	ARM	933	108	20.1029	16.8224	5.2039	8.74965	7.97199	1.88602	0.304702	2.32	0	1.56922
F10D7.4	chrX	17378557	17381745	-	No	-0.311256	0	0	481	No	ARM	1352	563	14.0259	1.30574	7.73483	1.18702	0	0.0885318	0.0430045	0	0	0.393512
F10D7.5	chrX	17382920	17391540	-	YES	-0.565892	687	40	337	YES	ARM	2349	1384	16.8127	17.3037	13.3245	11.5341	7.50423	14.982	0.26748	5.13	1.37	196.401
F11A6.1	chrI	11675931	11680958	+	YES	-0.50111	975	149	633	YES	ARM	754	754	70.2803	167.957	53.333	38.966	25.7323	1.87265	0.20054	18.35	1.01	161.863
F11A6.2	chrI	11680494	11682355	-	No	-0.395403	0	0	471	No	ARM	260	191	25.8692	4.11261	12.3837	6.09388	4.06265	3.19267	12.7643	0	0	8.90281
F11A6.3	chrI	11687801	11688513	+	No	-0.258848	0	0	68	No	ARM	46	46	16.3043	0	0.761602	0	0	0.616817	0.0274715	0	1.39	0
F11C3.1	chrI	14867912	14871354	+	No	-0.383024	227	172	602	No	ARM	1008	1008	41.3008	2.51852	0	1.72082	1.72004	2.65866	0.00271796	0	0	0.865899
F11C3.2	chrI	14872150	14875367	+	No	-0.305284	0	0	620	No	ARM	673	476	31.5691	4.69218	9.47401	3.73004	2.76878	0.249568	0.14278	0	0	3.56566
F11C3.3	chrI	14855918	14863518	-	No	-0.379674	292	0	786	YES	ARM	562	481	36.0125	117.096	902.486	749.751	536.988	27.7245	12.7982	7.63	6.74	986.896
F11C7.1	chrX	17429095	17433030	+	No	-0.31536	0	0	736	No	ARM	538	50	24.003	1.92338	8.21953	3.40386	1.87208	0.017121	0.00180374	0	0	0
F11C7.2	chrX	17396743	17397706	+	No	-0.255406	0	0	114	No	ARM	347	347	11.6052	0	35.8676	20.5009	13.214	0.104668	0.118609	0	0	29.429
F11C7.3	chrX	17393715	17396394	-	No	-0.31563	0	0	192	No	ARM	339	332	41.7711	0.323462	27.1371	12.6608	8.35437	0.0194717	0.0999641	0	0	27.4796
F11C7.4	chrX	17402479	17413776	-	No	-0.346784	0	41	89	YES	ARM	908	333	30.3216	19.8068	3.03292	1.45285	2.20425	0.740321	0.0776153	0	0	10.1729
F11C7.5	chrX	17420141	17421509	-	No	-0.473018	0	0	0	YES	ARM	111	111	7.82883	9.8101	209.273	194.083	164.735	40.5185	12.211	12.25	20.62	1999.34
F11C7.6	chrX	17401392	17402534	+	No	-0.251338	0	60	0	No	ARM	396	396	10.6843	0	2.18947	0.596799	1.30532	0	0	0	0	0
F11C7.7	chrX	17398554	17399280	+	No	-0.263064	0	0	0	No	ARM	295	295	20.9797	0	41.559	7.11347	2.88707	0	0.0088054	0	0	34.6809
F11D11.1	chrV	18769738	18770695	-	No	-0.233	0	0	191	No	ARM	49	49	10.9362	0	0	0	0	0	0	0	0	0
F11D11.11	chrV	18751238	18752271	-	No	-0.654534	0	164	0	No	ARM	204	204	5.82022	0	0	0	0	0	0	0	0	0
F11D11.12	chrV	18749550	18750663	-	No	-0.279959	0	0	108	No	ARM	74	74	2.56757	0.471729	0	0	0	0	0	0	0	0
F11D11.13	chrV	18742398	18745238	-	No	-0.38393	73	151	1695	No	ARM	1906	1906	4.4575	0	0	0	0	0	0	0	0	0
F11D11.14	chrV	18738926	18742180	-	No	-0.427605	0	1249	1095	No	ARM	1075	794	40.7033	0	0	0	0	0	0.0104526	0	0	0
F11D11.15	chrV	18755421	18756732	+	No	-0.442656	0	0	525	No	ARM	279	279	9.60204	0	0	0	0	0.0115663	0.00562683	0	0	0
F11D11.16	chrV	18756817	18757650	-	No	-0.316856	0	0	120	No	ARM	550	550	8.68364	0	0	0	0	0	0.089096	0	0	0
F11D11.19	chrV	18767725	18768386	-	No	-0.298992	0	0	80	No	ARM	129	129	4.25581	0	0	0	0	0	0	0	0	0
F11D11.3	chrV	18757887	18760257	-	No	-0.341901	0	119	235	No	ARM	594	594	21.7273	0	0	0	0	0	0.0128086	0	0	0
F11D11.4	chrV	18761349	18763498	+	No	-0.344731	0	0	193	No	ARM	679	674	16.6102	0	0	0	0	0	0	0	0	0.444923
F11D11.5	chrV	18753471	18754400	-	No	-0.164891	0	0	70	No	ARM	52	46	15.8077	0.513055	0	0	0	0	0.00477007	0	0	0
F11D11.6	chrV	18752453	18753108	-	No	-0.459419	0	0	315	No	ARM	229	229	24.0568	0	0	0	0	0	0.0154109	0	0	0
F11D11.7	chrV	18747914	18748798	-	No	-0.20984	0	0	0	No	ARM	52	50	15.0769	0	0	0	0	0	0.00365647	0	0	0
F11D11.8	chrV	18746181	18746959	-	No	-0.408116	0	0	0	No	ARM	112	112	1.16071	0.640164	0	0	0	0.0159272	0.00843206	0	0	0
F11E6.1	chrIV	17476585	17479350	+	No	-0.39204	0	0	0	No	ARM	546	497	31.7758	35.1109	38.7059	23.6264	14.1501	0.0746053	0.0315493	0	0	3.45298
F11E6.10	chrIV	17461871	17463121	-	No	-0.28715	0	0	0	No	ARM	628	628	15.4873	5.52334	0	0	1.19426	0	0.0103615	0	0	0.580792
F11E6.11	chrIV	17442837	17443699	+	No	-0.264375	0	0	0	No	ARM	112	112	12.3556	0	20.8443	9.68761	3.6877	0.144884	0.0768451	6.78	0	0
F11E6.2	chrIV	17474218	17475801	-	No	-0.283536	0	0	0	No	ARM	494	494	21.496	25.8608	1.52893	5.13815	1.08056	0.014126	0	0	0	1.40086
F11E6.3	chrIV	17470472	17471988	-	No	-0.260779	0	0	0	No	ARM	208	208	24.5962	2.01774	99.6124	338.863	528.059	52.986	34.8861	0	0	116.145
F11E6.4	chrIV	17469299	17470302	-	No	-0.282627	0	0	0	No	ARM	357	357	11.5714	1.55036	12.7961	15.077	3.91186	0.0227058	0.0227058	0	0	0
F11E6.5	chrIV	17466021	17467378	-	No	-0.2724	0	0	0	No	ARM	122	75	12.5867	24.5583	155.731	151.244	123.68	10.9625	6.67402	342.04	2	122.242
F11E6.6	chrIV	17464517	17465890	-	No	-0.338112	0	121	0	No	ARM	401	401	19.8055	0.561725	6.97541	2.93831	5.26936	0.0944748	0.0577945	0	0	0.406806
F11E6.7	chrIV	17457792	17461242	-	No	-0.316696	0	0	0	No	ARM	62	46	28.3871	127.034	10.9942	12.502	38.7441	183.55	13.6936	0	1.7	0.167528
F11E6.8	chrIV	17444083	17450506	-	No	-0.32445	0	60	747	No	ARM	2952	2952	32.069	33.2951	16.0818	13.4778	7.95111	0.0895389	0.0494021	0	0	23.9257
F11F1.1	chrIII	13395604	13400505	+	YES	-0.761518	0	0	1266	No	ARM	2246	2246	7.95604	0.970567	3.79843	7.15552	7.78773	0.417198	0.348163	0	0	0.736352
F11F1.2	chrIII	13398797	13399676	+	No	-0.177136	0	0	400	No	ARM	44	44	8.22727	1.57976	2.665	2.09747	8.62633	0.103146	0.0615339	0	0	0
F11F1.4	chrIII	13400860	13401672	-	No	-0.217773	89	0	324	No	ARM	45	44	8	0	0	0	0	0	0.00586798	0	0	0
F11F1.5	chrIII	13402106	13402935	+	No	-0.291477	88	0	175	No	ARM	44	44	12.0455	1.68636	0	0	0	0	0	0	0	0
F11F1.6	chrIII	13403145	13404205	+	No	-0.304197	0	0	140	No	ARM	183	183	16.9091	28.2777	15.2118	19.932	9.48773	0.257837	0.0794819	0	0	10.3711
F11F1.7	chrIII	13404548	13405544	+	No	-0.32061	0	0	0	No	ARM	408	408	49.4338	55.1425	1.52749	1.89952	0.948786	0	0.012511	0	0	1.22403
F11F1.8	chrIII	13397659	13398336	-	No	-0.328362	34	0	0	No	ARM	69	69	12.5909	1.10779	0.646314	0	0	0	0.00544865	0	0	0
F12B6.1	chrI	2255924	2272868	-	No	-0.527202	390	1631	4291	No	ARM	1386	213	74.9581	2.7274	8.80272	5.38777	3.45481	0.505366	5.03614	1.19	0	119.982
F12B6.2	chrI	2250132	2254894	+	No	-0.417258	268	167	908	No	ARM	1078	1078	131.705	1.26657	7.50803	10.3738	7.30119	0.466879	0.164443	12.05	0	0.497407
F12B6.3	chrI	2242231	2247296	+	No	-0.40267	123	1418	706	No	ARM	1039	578	149.99	0	0.557109	0	0	0.0833047	0.00243218	0	0	0
F12E12.1	chrII	3741884	3742507	+	No	-0.311	0	0	0	No	ARM	57	50	24.7	59.7694	1.68943	4.82297	12.7413	43.0652	0.178228	0	0	0
F12E12.10	chrII	3747786	3748804	-	No	-0.111792	0	0	0	No	ARM	53	53	26.7925	25.7717	0.903366	0	1.02056	0.0247432	0	0	0	0.281634
F12E12.11	chrII	3742470	3744352	-	No	-0.286678	0	0	213	No	ARM	273	273	31.9927	0	7.47912	0.281968	0.716319	1.47179	0.104616	0	0	0
F12E12.12	chrII	3744479	3745913	-	No	-0.389232	0	38	249	No	ARM	488	194	20.75	0	4.50026	0.644851	0	0.0544283	0.0076567	0	0	0.512224
F12E12.2	chrII	3739949	3740840	+	No	-0.356967	0	0	0	No	ARM	181	181	49	0	0	0	0	0	0	0	0	0
F12E12.3	chrII	3737336	3738285	+	No	-0.341371	0	0	0	No	ARM	240	240	32.0735	0	1.33462	0	0	1.37812	0	0	0	0
F12E12.4	chrII	3731975	3733207	+	No	-0.191727	0	0	0	No	ARM	45	44	33.3778	16.071	0	0.376726	1.71847	0.121906	0.0749035	0	0	0
F12E12.5	chrII	3730154	3731551	-	No	-0.267507	0	0	0	No	ARM	123	67	33.0714	0	0	0	0	0.0302744	0.0319118	0	0	0
F12E12.6	chrII	3735965	3736940	-	No	-0.284338	0	0	0	No	ARM	293	293	29.8696	0	0	5.11017	9.45553	2.00984	0	0	0	0
F12E12.7	chrII	3751256	3752287	-	No	-0.22351	0	0	0	No	ARM	51	51	10.7451	20.5358	0	0	2.00988	0.00938874	0	0	0	0
F12E12.8	chrII	3749071	3750722	-	No	-0.856792	522	0	0	No	ARM	631	631	35.4374	66.8683	0	0	3.37935	0.078502	0	0	0	0
F12E12.9	chrII	3746476	3747462	-	No	-0.167383	0	0	0	No	ARM	47	47	23.3617	32.2002	0.844266	0.44172	1.49054	0.101658	0	0	0	0
F13A2.1	chrV	4380743	4382368	-	No	-0.383952	0	62	541	No	ARM	584	584	52.7349	4.3692	2.03205	0	0	0	0.0415559	0	0	0
F13A2.10	chrV	4385652	4386279	-	No	-0.347217	0	0	0	No	ARM	363	46	11.8017	2.86603	0	0	0	0	0	0	0	0
F13A2.2	chrV	4383950	4384226	-	No	-0.212854	0	0	0	No	ARM	48	48	18.25	4.61028	0	0	0	0	0	0	0	23.5273
F13A2.3	chrV	4393413	4396520	-	No	-0.66034	729	0	1124	No	ARM	1002	1002	35.4637	0	0	0	0	0.00854815	0.0241762	0	0	0
F13A2.4	chrV	4398704	4399489	-	No	-0.341087	0	46	192	No	ARM	289	289	28.7543	1.05794	0	2.0661	13.3491	34.0475	27.4796	0	0	0
F13A2.5	chrV	4401283	4402001	-	No	-0.2765	0	0	0	No	ARM	54	54	13.6226	0	0	0	0	0	0.0716751	0	0	2.37656
F13A2.6	chrV	4402734	4404516	-	No	-0.484409	0	0	140	No	ARM	463	149	26.1364	0	0	0	0	0	0.786653	0	0	0
F13A2.8	chrV	4407804	4410004	+	No	-0.317728	0	0	380	No	ARM	618	618	51.5291	0	0	0	0	0	0.566321	0	0	0
F13A2.9	chrV	4387089	4387488	-	No	-0.306973	0	0	0	No	ARM	74	74	17.5946	1.52813	0	1.49772	0	0	0	0	0	0
F13A7.1	chrV	16376218	16377905	-	No	-0.5569	0	56	279	No	ARM	460	460	20.5667	0	0	5.56995	11.4685	0.711438	259.543	0	0	0
F13A7.10	chrV	16390913	16392386	+	No	-0.252266	0	0	0	No	ARM	527	527	69.5825	0.539345	0.568003	0	0	4.06656	0.0212603	0	0	0
F13A7.11	chrV	16394010	16395057	-	No	-0.314319	0	49	0	No	ARM	295	295	22.478	1.39261	7.00199	7.32523	4.10656	3.36652	1.01749	0	0	7.32407
F13A7.12	chrV	16396338	16398513	+	No	-0.34877	0	0	294	No	ARM	719	270	121.481	9.84483	0.490074	0	0	0	0.00231854	0	0	0
F13A7.13	chrV	16399667	16401605	+	No	-0.444742	0	0	381	No	ARM	388	388	11.1905	2.58982	1.65574	0.936233	0	0.141737	0.0327488	0	0	0
F13A7.14	chrV	16401868	16405249	+	No	-0.403499	208	111	297	No	ARM	1064	956	716.415	14.4656	4.0106	5.90054	13.6716	132.509	33.8358	0	0	4.88797
F13A7.2	chrV	16392461	16393808	-	No	-0.489083	0	0	193	No	ARM	145	145	17.4118	0	1.42751	0	0	0.0101264	0	0	0	0.201586
F13A7.3	chrV	16372396	16374756	-	No	-0.431462	0	50	353	No	ARM	685	559	24.6219	0	0	0.425956	0	0.0223593	0.00912306	0	0	0.204662
F13A7.4	chrV	16378871	16380468	+	No	-0.29811	0	0	197	No	ARM	666	666	10.4985	0	0	0	0	0	0	0	0	0
F13A7.6	chrV	16384469	16386116	-	No	-0.324694	0	54	0	No	ARM	200	49	32.449	0	0	0	0	0	0	0	0	0
F13A7.7	chrV	16382056	16383809	-	No	-0.340251	0	0	1250	No	ARM	334	334	11.76	0	0	0.679403	2.65255	0.0648643	23.4692	0	0	0
F13A7.8	chrV	16386641	16388348	-	No	-0.320877	0	0	0	No	ARM	593	593	23.3778	0	0	0	0	0.0402207	0	0	0	0
F13B10.1	chrIII	3869572	3901446	-	No	-0.404073	687	1704	2188	YES	ARM	8481	301	37.7515	29.6555	39.5081	10.3025	8.45695	1.35931	0.0972252	11.78	1.92	71.982
F13B10.2	chrIII	3867832	3869527	+	No	-0.396431	0	0	0	YES	ARM	511	511	13.9259	271.255	1410.63	1906.61	1685.2	6389.31	2437.03	3827.72	25.53	1774.26
F13C5.1	chrX	601574	604922	+	No	-0.345176	0	0	489	No	ARM	1624	1624	26.3333	7.72728	5.99497	2.19232	2.78679	1.34027	0.08802	2.26	0	131.039
F13C5.2	chrX	593952	596299	+	No	-0.295957	0	0	5	YES	ARM	301	301	24.16	123.404	41.2011	10.9535	18.8132	3.9269	0.420512	8.64	1.28	151.283
F13C5.3	chrX	599067	599535	-	No	-0.362646	0	0	0	No	ARM	701	243	32.3609	2.76709	2.77086	0.977518	0	0	0	0	0	0
F13C5.5	chrX	604926	608492	-	No	-0.353918	48	74	812	No	ARM	1956	49	25.2563	13.7595	37.5228	15.7636	11.4614	0.177062	0.0255612	1.34	1.37	39.0032
F13C5.6	chrX	611118	621290	-	No	-0.404868	382	1	1673	No	ARM	3026	2173	30.6373	14.0821	26.442	15.3728	6.92706	1.4224	1.09094	0	5.09	81.1403
F13D12.10	chrII	11713773	11716747	+	No	-0.390467	90	0	152	No	ARM	1236	1236	25.0152	2.56694	12.8739	4.09618	1.8147	0.201005	0.0388774	0	0	4.22324
F13D12.2	chrII	11725259	11726469	+	No	-0.194489	0	0	0	No	ARM	57	47	7.14894	61.6559	83.8182	59.7371	45.4765	51.7263	11.9953	7.13	1.12	252.999
F13D12.3	chrII	11720443	11722252	+	No	-0.313755	0	0	154	No	ARM	747	747	44.8849	2.54959	6.81659	11.8754	8.74379	2.71352	1.16514	2.86	0	12.924
F13D12.4	chrII	11728885	11731163	+	No	-0.395915	0	0	0	No	ARM	508	508	10.037	64.903	323.024	428.812	303.184	108.902	53.9708	651.39	28.74	2642.72
F13D12.5	chrII	11726753	11728449	+	No	-0.273	0	0	0	No	ARM	52	47	2.69231	17.0022	5.03314	30.625	48.3973	89.7237	47.5453	0	0	5.18547
F13D12.6	chrII	11739392	11743335	+	No	-0.432851	233	56	572	No	ARM	704	704	38.2244	19.7262	113.431	127.926	69.7284	9.46137	4.11335	73.2	0	28.1776
F13D12.7	chrII	11742751	11748548	-	No	-0.413449	0	0	104	YES	ARM	1447	1447	54.0198	119.221	106.17	65.2344	51.0153	146.978	19.1905	43.49	22.29	5014.84
F13D12.8	chrII	11731162	11732531	-	No	-0.512339	118	0	425	No	ARM	435	257	29.5678	15.892	4.70634	10.3353	5.95979	0.932044	0.332028	0	0	11.0456
F13D12.9	chrII	11707101	11709509	-	No	-0.348873	0	0	51	No	ARM	102	102	2.88235	14.8392	6.26446	10.2273	4.37902	1.50325	101.999	0	0	4.83396
F13G11.1	chrIV	14621986	14623589	+	No	-0.351498	0	52	0	No	ARM	2740	418	27.2336	66.0311	42.4003	27.6781	15.2541	12.954	0.724401	10.21	0	1177.72
F13G11.2	chrIV	14633096	14634341	+	No	-0.323682	0	0	0	No	ARM	307	179	10.449	0	0	0.634213	1.61117	0.0735621	14.749	0	0	0
F13G11.3	chrIV	14635097	14636025	+	No	-0.375681	0	0	0	No	ARM	119	119	0.672269	0.772306	0	58.645	141.275	0.764194	0.0569571	0	0	0
F14B6.1	chrI	12216239	12217757	-	No	-0.333511	0	0	87	No	ARM	444	444	8.93919	25.4692	1.6255	0	2.40439	0.200274	0.100784	0	0	0
F14B6.2	chrI	12218427	12222208	-	No	-0.636897	238	0	212	No	ARM	592	592	59.8606	3.77012	8.65705	3.51757	1.80074	0.596878	0.291282	0	0	144.396
F14B6.3	chrI	12230406	12232299	+	No	-0.357542	0	0	258	No	ARM	517	517	39.7407	37.8088	0	0	4.46977	0.883001	0.00462199	0	0	0
F14B6.4	chrI	12236008	12238243	+	No	-0.345398	0	186	399	No	ARM	620	309	35.0968	2.63993	0.329287	0	0	0.0691658	0	0	0	0
F14B6.5	chrI	12239150	12241799	+	No	-0.310609	0	0	461	No	ARM	163	64	14.8929	0.520626	0	0.281322	0	0	0	0	0	0
F14B6.6	chrI	12232679	12235095	+	No	-0.407497	0	48	95	No	ARM	562	439	56.1566	6.30804	3.65568	5.66316	1.8391	0.112691	0.064785	2.88	0	1.28352
F14D2.11	chrII	3341297	3342119	-	No	-0.163589	0	0	0	YES	ARM	56	56	21.7551	3.6038	1.21583	4.2631	6.21804	24.3636	5.16774	0	0	0
F14D2.12	chrII	3345282	3346374	-	No	-0.302767	0	0	0	No	ARM	49	43	79.4884	13.8361	1.82756	7.72209	23.0613	109.363	28.6366	1.07	1.97	0
F14D2.13	chrII	3343686	3344970	-	No	-0.298824	0	0	0	No	ARM	74	74	46.6216	2.6923	1.04637	5.80723	10.5356	30.0584	8.15809	1.57	0	1.63463
F14D2.15	chrII	3342336	3343556	-	No	-0.284761	0	0	0	No	ARM	54	46	68.5652	3.58144	2.16207	6.69861	11.466	18.4893	4.17604	0	0	0
F14D2.17	chrII	3331891	3334224	+	No	-0.426171	0	0	0	No	ARM	330	41	82.8644	0	0	0	0	0.0471321	0	0	0	0
F14D2.2	chrII	3359141	3361417	+	No	-0.353453	0	0	57	No	ARM	472	117	66.1887	2.0637	0.220788	4.0468	10.6733	14.2022	2.96607	0	0	7.21109
F14D2.4	chrII	3350252	3358984	+	No	-0.587644	169	6	6254	No	ARM	7613	7613	66.8261	6.66021	1.31293	3.71093	12.2238	32.0661	8.88845	0	0	0.620725
F14D2.5	chrII	3340391	3341217	+	No	-0.286283	0	0	0	No	ARM	286	286	80.2028	1.61446	0	0	0	5.99157	0.950411	0	0	14.0344
F14D2.6	chrII	3329719	3331809	+	No	-0.437238	0	0	57	No	ARM	211	105	34.1455	0.79829	0	0	0	0.230783	0	0	0	0
F14D2.7	chrII	3335443	3338659	-	No	-0.304692	0	0	43	No	ARM	986	986	39.4899	0	10.7134	2.43388	0.881441	0	0	0	0	0
F14D2.8	chrII	3347031	3349343	-	No	-0.469913	249	27	0	No	ARM	725	725	26.2727	0.306573	0.855494	1.78004	3.64946	18.1159	4.08592	0	0	0
F14F4.1	chrX	14924962	14928864	-	No	-0.409696	0	96	641	No	ARM	1280	1052	25.1074	1.04394	2.05286	0	0.533776	0.0937284	0.00286191	0	0	8.28831
F14F4.3	chrX	14938181	14946249	-	No	-0.416788	0	116	41	No	ARM	1041	245	37.318	41.7703	29.7205	29.498	22.7022	9.6453	0.956298	16.47	0	13.4138
F14F7.1	chrIII	13018833	13020130	+	No	-0.226566	0	0	127	No	ARM	122	122	44.7931	0.559351	163.786	237.145	437.795	40.6162	40.7453	1.31	0	120.983
F14F7.2	chrIII	13020907	13023848	+	No	-0.32963	98	146	0	No	ARM	679	679	58.6082	0	1.26468	0	0	0	0.00440829	0	0	0
F14F7.3	chrIII	13024494	13027911	+	No	-0.346386	0	121	1027	No	ARM	871	871	31	0	28.1587	0.679414	0.29451	0.0599543	0.0126205	0	0	0
F14F7.4	chrIII	13028279	13029563	-	No	-0.518907	66	34	300	No	ARM	280	280	56.1607	0	0	3.36543	6.11451	0.312855	80.8118	0	0	0
F14F7.5	chrIII	13030818	13036242	+	No	-0.350596	0	0	1538	No	ARM	1162	285	70.3214	0	0.66265	0.135459	0.344123	0.00946949	0.0267892	0	0	0
F14F8.1	chrV	16669317	16671269	-	No	-0.332054	0	0	0	No	ARM	854	854	34.8817	0	0	0	0	0	0	0	0	0
F14F8.10	chrV	16697455	16699751	+	No	-0.269775	0	0	151	No	ARM	560	560	114.786	0	0	0	0	0	0	0	0	0
F14F8.11	chrV	16692102	16693810	-	No	-0.358094	0	0	0	No	ARM	469	469	6.82609	0	0.317251	0	0	0	0	0	0	0
F14F8.12	chrV	16694815	16696570	+	No	-0.299094	0	0	400	No	ARM	384	223	34.8889	0	0.494373	0	0	0	0	0	0	0
F14F8.13	chrV	16687505	16689845	+	No	-0.427432	222	0	246	No	ARM	1046	1046	30.1759	0	0	0	0	0	0	0	0	0
F14F8.14	chrV	16666318	16666726	-	No	-0.378353	0	0	0	No	ARM	204	204	7.40686	0	0	0	0	0	0	0	0	0
F14F8.2	chrV	16673401	16674669	+	No	-0.357937	0	0	116	No	ARM	111	111	96	0	0	0	0	0	0	0	0	0
F14F8.3	chrV	16675831	16677530	+	No	-0.360416	0	0	194	No	ARM	527	527	33.3443	0	0	0	0	0	0	0	0	0
F14F8.4	chrV	16677601	16679316	-	No	-0.347859	0	0	146	No	ARM	518	518	33.7857	0	0	0	0	0	0	0	0	0
F14F8.5	chrV	16685360	16687062	+	No	-0.297136	0	0	409	No	ARM	427	427	26.5	0	0	0	0	0	0	0	0	0
F14F8.6	chrV	16680259	16682635	+	No	-0.306639	0	281	235	No	ARM	819	819	56.8132	0	0	0	0	0	0.00507753	0	0	0
F14F8.7	chrV	16683164	16684857	+	No	-0.654909	237	0	147	No	ARM	638	638	2.8	0	0	0	0	0	0	0	0	0
F14F8.8	chrV	16671600	16672165	-	No	-0.359965	0	0	370	No	ARM	258	258	15.9147	0	1.37555	0	0	0	0	0	0	0
F14F8.9	chrV	16667669	16668552	-	No	-0.419296	0	0	0	No	ARM	169	169	21.5333	0	0	0	0	0	0	0	0	0
[truncated: 18,736 more rows]
