# Supplementary material
Source: HighWire-hosted journal article supplement (doi:10.1101/rna.067405.118)
Supplement: Supplemental_File_S3.xlsx [file Supplemental_File_S3.xlsx]

## Sheet: Key
Column	Description
Chromosome	Chromosome where the IR/TR is present.
Start	IR/TR start coordinate.
Stop	IR/TR end coordinate.
5+ reads?	Yes/no designation of whether the IR/TR overlaps a genomic region covered by 5 or more reads in the RNAseq datasets used to define EERs in Reich et al. 2018.

## Sheet: IRs
Chromosome	Start	Stop	5+ reads?
chrI	2049	2476	No
chrI	3228	3655	YES
chrI	4442	4543	YES
chrI	4632	4736	YES
chrI	7165	7258	No
chrI	7293	7385	No
chrI	9197	9328	YES
chrI	9376	9508	YES
chrI	11881	12065	YES
chrI	12155	12339	YES
chrI	13577	13663	YES
chrI	13945	14031	YES
chrI	14689	14748	YES
chrI	14833	14892	YES
chrI	15527	15692	YES
chrI	15723	15887	YES
chrI	20105	20161	No
chrI	20164	20221	No
chrI	21551	21624	No
chrI	21954	22022	No
chrI	30745	30845	No
chrI	31005	31105	No
chrI	31234	31259	No
chrI	31656	31681	No
chrI	35711	35770	No
chrI	35822	35880	No
chrI	36974	37339	YES
chrI	37533	37898	YES
chrI	42569	42627	No
chrI	42737	42795	No
chrI	46571	46606	No
chrI	46680	46714	No
chrI	50162	50209	No
chrI	50347	50376	No
chrI	50650	50703	No
chrI	51438	51819	No
chrI	51846	52228	No
chrI	54802	54905	No
chrI	54922	55010	No
chrI	57077	57173	No
chrI	57663	57758	No
chrI	63290	63464	No
chrI	63526	63699	No
chrI	64469	64632	No
chrI	64752	64915	No
chrI	69328	69432	No
chrI	69593	69699	No
chrI	70531	70614	YES
chrI	70685	70782	YES
chrI	70943	71043	YES
chrI	71061	71148	YES
chrI	74119	74142	No
chrI	74145	74168	No
chrI	74447	74496	YES
chrI	74508	74557	No
chrI	76460	76489	No
chrI	76616	76645	No
chrI	83674	83742	No
chrI	83879	83950	No
chrI	90002	90040	No
chrI	90073	90111	No
chrI	91838	91882	No
chrI	92008	92054	No
chrI	97339	97373	No
chrI	97481	97516	No
chrI	101832	101919	YES
chrI	101963	102012	YES
chrI	102026	102065	YES
chrI	103255	103331	YES
chrI	103357	103393	YES
chrI	103508	103544	YES
chrI	103557	103635	YES
chrI	103711	103839	No
chrI	104123	104240	No
chrI	104800	104943	YES
chrI	105008	105154	YES
chrI	115079	115205	No
chrI	115289	115415	No
chrI	116343	116367	No
chrI	117028	117051	No
chrI	126873	126965	YES
chrI	127045	127136	No
chrI	131612	131690	No
chrI	131967	132045	No
chrI	134720	134799	No
chrI	134886	134965	No
chrI	135148	135208	No
chrI	135286	135347	No
chrI	158360	158627	YES
chrI	158740	158992	No
chrI	180718	180770	YES
chrI	180837	180896	YES
chrI	180906	180945	YES
chrI	181057	181099	YES
chrI	184310	184453	No
chrI	184946	185090	No
chrI	185716	185873	No
chrI	185942	186099	No
chrI	192353	192409	No
chrI	192480	192535	No
chrI	194012	194038	No
chrI	194202	194228	No
chrI	196351	196407	No
chrI	196714	196771	No
chrI	198287	198432	YES
chrI	198778	198922	YES
chrI	199135	199176	No
chrI	199316	199357	YES
chrI	199367	199398	YES
chrI	199409	199440	YES
chrI	199591	199725	YES
chrI	199816	199951	YES
chrI	200842	201000	YES
chrI	201046	201203	YES
chrI	203768	203809	No
chrI	203811	203851	No
chrI	203924	203966	No
chrI	203982	204023	No
chrI	205656	205759	No
chrI	205774	205825	No
chrI	205888	205938	No
chrI	205982	206082	No
chrI	214103	214124	YES
chrI	214137	214158	YES
chrI	214465	214534	No
chrI	214595	214666	No
chrI	220604	220677	No
chrI	220725	220796	No
chrI	221715	221950	No
chrI	222023	222257	No
chrI	246538	246702	No
chrI	246799	246968	No
chrI	247129	247178	No
chrI	247201	247250	No
chrI	247558	247632	No
chrI	247721	247795	No
chrI	247829	247908	No
chrI	247975	248057	No
chrI	250418	250545	YES
chrI	250566	250696	No
chrI	256709	256876	No
chrI	256947	257122	No
chrI	259716	259827	No
chrI	259920	260032	No
chrI	263701	263735	No
chrI	263810	263845	No
chrI	264018	264054	No
chrI	264120	264153	No
chrI	265542	265714	No
chrI	265873	266034	No
chrI	278834	278863	No
chrI	278874	278902	No
chrI	289941	289974	No
chrI	290180	290259	No
chrI	290668	290739	YES
chrI	290903	290973	No
chrI	294575	294689	No
chrI	294781	294894	YES
chrI	309834	309942	No
chrI	310007	310115	No
chrI	315742	315872	No
chrI	315898	316026	No
chrI	318293	318364	YES
chrI	318433	318506	YES
chrI	332137	332189	No
chrI	332318	332370	YES
chrI	333423	333542	YES
chrI	333572	333688	No
chrI	334691	334858	No
chrI	334891	335058	No
chrI	336278	336448	YES
chrI	336463	336638	YES
chrI	337043	337158	YES
chrI	337262	337363	YES
chrI	344413	344578	No
chrI	344682	344846	No
chrI	352170	352323	No
chrI	352404	352551	No
chrI	355842	355869	No
chrI	355993	356016	No
chrI	356109	356136	No
chrI	356214	356258	No
chrI	356269	356335	No
chrI	356529	356552	No
chrI	359516	359566	No
chrI	359633	359683	No
chrI	361814	361881	No
chrI	362053	362120	No
chrI	368433	368483	YES
chrI	368625	368674	YES
chrI	369709	369735	No
chrI	369836	369931	YES
chrI	369959	370055	No
chrI	370143	370205	YES
chrI	370286	370355	YES
chrI	371749	371768	No
chrI	372208	372238	No
chrI	372347	372377	No
chrI	372405	372424	No
chrI	385632	385755	YES
chrI	385864	385998	YES
chrI	389858	389967	YES
chrI	390061	390168	YES
chrI	390674	390698	No
chrI	390718	390742	No
chrI	394569	394608	No
chrI	394678	394717	No
chrI	396192	396286	No
chrI	396417	396511	No
chrI	397523	397553	No
chrI	397658	397688	No
chrI	404316	404353	YES
chrI	404497	404535	YES
chrI	405277	405587	YES
chrI	405636	405948	YES
chrI	406667	406962	YES
chrI	406975	407269	YES
chrI	408871	409096	YES
chrI	409257	409492	YES
chrI	409895	410009	No
chrI	410025	410146	No
chrI	411597	411740	YES
chrI	411778	411919	YES
chrI	413191	413425	No
chrI	413634	413863	No
chrI	417154	417196	No
chrI	417316	417358	No
chrI	425603	425635	No
chrI	426039	426069	No
chrI	431599	431728	YES
chrI	431967	432097	No
chrI	432985	433007	YES
chrI	433142	433164	No
chrI	442777	442810	No
chrI	442886	442919	No
chrI	445810	445878	YES
chrI	445915	446016	YES
chrI	446162	446332	YES
chrI	447353	447405	No
chrI	447562	447614	YES
chrI	451921	452118	YES
chrI	452217	452404	YES
chrI	453108	453207	YES
chrI	453223	453324	No
chrI	453994	454176	YES
chrI	454233	454255	No
chrI	454272	454294	YES
chrI	454298	454497	YES
chrI	458796	458861	No
chrI	458914	458978	No
chrI	459245	459309	YES
chrI	459453	459518	YES
chrI	460581	460634	No
chrI	460757	460852	No
chrI	464017	464072	No
chrI	464140	464195	No
chrI	471489	471679	YES
chrI	471734	471922	YES
chrI	472696	472721	No
chrI	472732	472757	No
chrI	472767	472786	No
chrI	476741	476814	No
chrI	476911	477018	No
chrI	477035	477142	No
chrI	485641	485750	No
chrI	485769	485874	No
chrI	487114	487133	No
chrI	487209	487228	No
chrI	490347	490389	YES
chrI	490403	490445	YES
chrI	490500	490579	YES
chrI	490597	490678	No
chrI	493981	494030	No
chrI	494061	494110	No
chrI	495574	495606	No
chrI	495658	495691	No
chrI	496492	496566	No
chrI	497123	497166	No
chrI	497280	497325	No
chrI	497334	497409	No
chrI	497889	497984	No
chrI	498058	498131	No
chrI	498176	498251	No
chrI	498276	498374	No
chrI	500237	500578	No
chrI	500635	500971	YES
chrI	500992	501043	No
chrI	501119	501170	No
chrI	502170	502220	No
chrI	502262	502312	No
chrI	502332	502399	No
chrI	502573	502592	No
chrI	502653	502687	No
chrI	502714	502764	No
chrI	502788	502855	No
chrI	504499	504704	No
chrI	505282	505490	No
chrI	509453	509565	No
chrI	509593	509704	No
chrI	509961	510000	No
chrI	510025	510064	No
chrI	511783	512102	YES
chrI	512125	512443	YES
chrI	514385	514669	YES
chrI	514682	514980	YES
chrI	515351	515813	YES
chrI	515831	516327	YES
chrI	517065	517310	YES
chrI	517334	517607	YES
chrI	525190	525227	No
chrI	525244	525281	No
chrI	526039	526142	No
chrI	533338	533439	No
chrI	533456	533557	No
chrI	537884	538001	YES
chrI	538071	538221	YES
chrI	538303	538455	YES
chrI	538456	538589	YES
chrI	542956	543219	No
chrI	543567	543831	No
chrI	551105	551273	YES
chrI	551480	551642	YES
chrI	551934	551961	No
chrI	552356	552383	No
chrI	553618	553653	No
chrI	553681	553717	No
chrI	554444	554612	YES
chrI	554693	554861	YES
chrI	557613	557951	YES
chrI	558008	558346	YES
chrI	558891	558922	No
chrI	559013	559044	YES
chrI	560911	560976	No
chrI	560981	561018	No
chrI	561272	561340	No
chrI	564127	564183	No
chrI	564464	564519	No
chrI	568219	568324	No
chrI	568349	568434	No
chrI	568523	568613	No
chrI	568618	568731	No
chrI	569797	569856	No
chrI	569879	569934	No
chrI	575956	575983	No
chrI	576587	576614	No
chrI	577599	577633	No
chrI	577833	577868	No
chrI	583414	583435	No
chrI	583441	583462	No
chrI	596939	597103	No
chrI	597134	597299	No
chrI	597335	597394	No
chrI	597435	597494	No
chrI	598682	598763	No
chrI	601099	601119	No
chrI	601120	601140	No
chrI	601960	602046	No
chrI	602527	602577	YES
chrI	602809	602859	No
chrI	602934	603021	No
chrI	603828	603864	No
chrI	604126	604162	No
chrI	605329	605372	No
chrI	605649	605695	No
chrI	605719	605763	No
chrI	605793	605840	No
chrI	608037	608073	No
chrI	608083	608121	No
chrI	608759	608782	No
chrI	614043	614172	No
chrI	614220	614345	No
chrI	614455	614474	No
chrI	614524	614556	No
chrI	615034	615065	No
chrI	615144	615175	No
chrI	615412	615511	No
chrI	615546	615643	No
chrI	616145	616164	No
chrI	616192	616211	No
chrI	616298	616317	No
chrI	616370	616892	No
chrI	616896	617624	No
chrI	622458	622758	YES
chrI	622762	623063	YES
chrI	623252	623340	No
chrI	624445	625322	No
chrI	625935	626810	No
chrI	627554	627592	No
chrI	627597	628244	No
chrI	629658	629951	YES
chrI	630020	630309	YES
chrI	630387	630701	YES
chrI	630713	631027	YES
chrI	633065	633447	YES
chrI	633474	633856	YES
chrI	634838	635332	YES
chrI	635360	635790	YES
chrI	635953	636100	YES
chrI	639011	639030	No
chrI	639107	639126	No
chrI	639511	639736	No
chrI	639883	640090	No
chrI	640499	640538	No
chrI	640605	640643	No
chrI	642407	642466	No
chrI	642577	642776	No
chrI	643524	643667	No
chrI	644689	644710	No
chrI	645285	645306	No
chrI	646103	646217	No
chrI	646254	646484	No
chrI	646525	646562	No
chrI	646600	646637	No
chrI	646687	646804	No
chrI	647334	647540	No
chrI	652647	652745	YES
chrI	652847	652872	No
chrI	652940	652964	YES
chrI	653042	653148	No
chrI	653239	653263	No
chrI	653286	653310	No
chrI	653581	653602	No
chrI	655147	655288	YES
chrI	655357	655497	YES
chrI	655927	656239	YES
chrI	656251	656542	No
chrI	658139	658183	No
chrI	658199	658241	No
chrI	659722	659815	YES
chrI	659847	659939	YES
chrI	660390	660469	YES
chrI	660483	660562	YES
chrI	662066	662280	No
chrI	662302	662549	No
chrI	666316	666344	No
chrI	666389	666417	No
chrI	667976	667999	No
chrI	668093	668116	No
chrI	668232	668681	No
chrI	669672	670106	No
chrI	676485	677651	No
chrI	677842	679008	No
chrI	679491	679585	No
chrI	679682	679774	No
chrI	681831	681953	No
chrI	681992	682116	No
chrI	684447	684846	No
chrI	684930	685332	No
chrI	687940	687959	No
chrI	688689	688708	No
chrI	693862	693920	No
chrI	694084	694153	No
chrI	694254	694311	No
chrI	694724	694758	No
chrI	694801	694822	YES
chrI	695467	695502	No
chrI	695537	695751	YES
chrI	696198	696404	No
chrI	697751	697794	No
chrI	697847	697903	No
chrI	698450	698495	No
chrI	698792	698853	No
chrI	698872	698918	No
chrI	699175	699236	No
chrI	699540	699618	No
chrI	699911	699992	No
chrI	700473	700554	YES
chrI	701028	701076	No
chrI	701202	701249	YES
chrI	701921	702068	YES
chrI	702087	702232	No
chrI	704718	704797	YES
chrI	704854	704930	No
chrI	705479	705890	YES
chrI	705991	706405	YES
chrI	707004	707123	YES
chrI	707164	707281	YES
chrI	707427	707564	No
chrI	707586	707721	No
chrI	708352	709040	YES
chrI	709104	709271	YES
chrI	709354	709517	YES
chrI	709532	709600	YES
chrI	709615	709702	YES
chrI	709806	709880	No
chrI	709928	710004	YES
chrI	710341	710617	YES
chrI	710634	710914	YES
chrI	711192	711226	YES
chrI	711246	711281	YES
chrI	711386	711518	YES
chrI	711525	711612	No
chrI	713685	714034	YES
chrI	714091	714433	YES
chrI	714527	714742	YES
chrI	714835	715051	YES
chrI	717055	717267	No
chrI	717297	717509	No
chrI	721018	721211	No
chrI	721799	722007	YES
chrI	723575	723668	No
chrI	723722	723753	No
chrI	724003	724056	No
chrI	724233	724344	No
chrI	725717	725958	No
chrI	725972	726214	No
chrI	727245	727265	No
chrI	727269	727289	No
chrI	727324	727344	YES
chrI	727420	727595	No
chrI	727771	727885	YES
chrI	728076	728181	YES
chrI	728421	728596	No
chrI	730659	730678	No
chrI	730757	730776	No
chrI	731488	731575	No
chrI	731820	731907	No
chrI	738042	738062	No
chrI	738115	738135	No
chrI	738542	738562	No
chrI	739707	739826	No
chrI	740180	740304	No
chrI	743608	743743	No
chrI	743849	743984	No
chrI	744769	744888	No
chrI	744930	744949	No
chrI	745025	745044	No
chrI	745185	745273	No
chrI	753097	753135	No
chrI	753521	753559	No
chrI	753881	754042	No
chrI	754282	754435	No
chrI	755374	755472	No
chrI	755692	755790	No
chrI	759933	760016	No
chrI	760043	760124	No
chrI	763863	763892	YES
chrI	763973	764005	YES
chrI	764215	764247	No
chrI	764359	764388	No
chrI	779369	779403	No
chrI	779507	779541	No
chrI	779653	779688	No
chrI	779741	779777	No
chrI	781209	781319	No
chrI	781431	781542	No
chrI	782247	782266	No
chrI	782342	782361	No
chrI	788592	788694	No
chrI	788727	788834	No
chrI	790300	790326	No
chrI	790329	790354	No
chrI	793347	793366	No
chrI	794053	794072	No
chrI	799136	799256	No
chrI	799648	799759	No
chrI	825130	825149	No
chrI	825224	825243	YES
chrI	826844	826907	YES
chrI	826964	826993	YES
chrI	827026	827055	No
chrI	827113	827178	No
chrI	827208	827273	No
chrI	827330	827356	No
chrI	830447	830535	YES
chrI	830575	830595	No
chrI	830677	830697	No
chrI	830912	831001	YES
chrI	835512	835545	YES
chrI	835965	835998	No
chrI	836576	836756	No
chrI	836799	836832	No
chrI	836872	836905	YES
chrI	836908	837087	YES
chrI	837659	837730	YES
chrI	837843	837913	YES
chrI	838487	838506	No
chrI	839153	839203	No
chrI	839582	839632	YES
chrI	844464	844484	No
chrI	844556	844576	No
chrI	845352	845399	No
chrI	845475	845522	No
chrI	855397	855930	YES
chrI	855946	856478	YES
chrI	856513	856912	No
chrI	856942	857376	No
chrI	857545	857584	No
chrI	857688	857736	No
chrI	859479	859794	YES
chrI	859907	860261	YES
chrI	860444	860534	No
chrI	860535	860627	YES
chrI	861401	861455	YES
chrI	862460	862710	YES
chrI	862767	863017	YES
chrI	863076	863358	YES
chrI	863387	863673	YES
chrI	863701	864000	YES
chrI	864018	864322	YES
chrI	866274	866312	No
chrI	866554	866592	No
chrI	867683	868081	YES
chrI	868193	868591	YES
chrI	869335	869705	YES
chrI	869818	870157	YES
chrI	870436	870597	No
chrI	871308	871476	No
chrI	872271	872303	No
chrI	872320	872472	No
chrI	877983	878002	YES
chrI	878054	878073	YES
chrI	880229	880255	YES
chrI	880864	880890	No
chrI	885370	885559	YES
chrI	885974	886042	YES
chrI	888435	888456	No
chrI	888532	888553	No
chrI	888679	888900	No
chrI	889376	889582	No
chrI	890736	890768	No
chrI	890921	890953	No
chrI	891240	891271	No
chrI	891448	891560	No
chrI	892308	892423	No
chrI	895241	895396	No
chrI	895588	895781	No
chrI	896264	896326	No
chrI	896339	896515	No
chrI	896590	896971	No
chrI	899929	899964	No
chrI	900292	900327	No
chrI	901455	901708	YES
chrI	901719	901976	YES
chrI	901994	902123	YES
chrI	902173	902274	No
chrI	902411	902453	No
chrI	902538	902749	YES
chrI	902815	903039	YES
chrI	903767	904019	YES
chrI	904031	904286	YES
chrI	904867	905249	YES
chrI	905276	905658	YES
chrI	906147	906192	No
chrI	906369	906424	No
chrI	906869	906898	No
chrI	911559	911608	No
chrI	911959	912122	No
chrI	912145	912310	No
chrI	922199	922220	No
chrI	922275	922297	No
chrI	922372	922394	No
chrI	925698	925746	No
chrI	925820	925868	No
chrI	929257	929413	No
chrI	930109	930278	No
chrI	930452	930688	No
chrI	930772	931008	No
chrI	937001	937066	YES
chrI	937146	937179	YES
chrI	937184	937233	YES
chrI	937615	937769	YES
chrI	937852	937998	No
chrI	946767	946864	No
chrI	946993	947099	YES
chrI	947809	947849	No
chrI	947858	947942	No
chrI	947955	948004	No
chrI	948286	948305	No
chrI	948381	948400	No
chrI	948443	948492	No
chrI	948890	948952	YES
chrI	949622	949642	YES
chrI	949676	949739	No
chrI	949959	950139	YES
chrI	950217	950397	YES
chrI	950641	950695	YES
chrI	951489	951522	No
chrI	951618	951652	No
chrI	951895	952042	YES
chrI	952170	952304	YES
chrI	952319	952647	YES
chrI	953434	953770	YES
chrI	955132	955160	No
chrI	955226	955255	No
chrI	964317	964343	No
chrI	964371	964391	No
chrI	964414	964550	YES
chrI	964733	964871	YES
chrI	964878	964898	No
chrI	964945	964971	No
chrI	965279	965304	No
chrI	965658	965683	No
chrI	965869	966038	YES
chrI	966129	966302	YES
chrI	967046	967147	No
chrI	967164	967265	No
chrI	999758	1000039	No
chrI	1000385	1000459	No
chrI	1000469	1000838	No
chrI	1006652	1006869	No
chrI	1007661	1007894	No
chrI	1010911	1010959	No
chrI	1011302	1011350	No
chrI	1011926	1012043	No
chrI	1012060	1012186	No
chrI	1015930	1016098	No
chrI	1016711	1016861	No
chrI	1019488	1019513	No
chrI	1019597	1019622	No
chrI	1020179	1020493	YES
chrI	1020513	1020821	YES
chrI	1021691	1022030	No
chrI	1022354	1022683	No
chrI	1024276	1024392	YES
chrI	1024418	1024460	No
chrI	1024480	1024792	YES
chrI	1024816	1025199	YES
chrI	1025217	1025339	YES
chrI	1025362	1025742	YES
chrI	1025770	1026149	YES
chrI	1031149	1031470	YES
chrI	1031576	1031915	YES
chrI	1035566	1035726	YES
chrI	1035748	1036018	YES
chrI	1036039	1036452	YES
chrI	1036457	1037241	YES
chrI	1037862	1037943	No
chrI	1037995	1038073	No
chrI	1038286	1038326	YES
chrI	1038632	1038673	No
chrI	1041926	1041974	No
chrI	1042046	1042071	No
chrI	1042121	1042169	No
chrI	1042270	1042326	No
chrI	1042347	1042731	YES
chrI	1042783	1043167	YES
chrI	1044565	1044603	No
chrI	1044615	1044654	No
chrI	1044741	1044857	No
chrI	1045124	1045643	No
chrI	1045700	1046219	No
chrI	1046652	1046683	No
chrI	1047509	1047541	No
chrI	1048835	1048854	YES
chrI	1048919	1048938	YES
chrI	1050748	1050901	YES
chrI	1051267	1051419	YES
chrI	1051615	1051668	YES
chrI	1051826	1051879	YES
chrI	1053960	1053996	YES
chrI	1054015	1054038	YES
chrI	1054554	1054576	No
chrI	1054638	1054660	No
chrI	1055270	1055469	No
chrI	1055517	1055717	No
chrI	1056528	1056680	YES
chrI	1056700	1056846	YES
chrI	1057525	1057544	No
chrI	1057550	1057569	No
chrI	1057976	1058080	YES
chrI	1058103	1058361	YES
chrI	1058485	1058746	YES
chrI	1058750	1058854	YES
chrI	1058955	1058981	YES
chrI	1059254	1059280	YES
chrI	1059629	1059705	YES
chrI	1059733	1060053	YES
chrI	1060067	1060343	YES
chrI	1062782	1062832	YES
chrI	1062874	1062924	YES
chrI	1063238	1063275	YES
chrI	1063355	1063389	YES
chrI	1064025	1064289	YES
chrI	1064306	1064571	YES
chrI	1065050	1065085	YES
chrI	1065167	1065202	YES
chrI	1065634	1065668	No
chrI	1069948	1070007	No
chrI	1070081	1070143	No
chrI	1071000	1071019	YES
chrI	1071095	1071114	YES
chrI	1071357	1071432	YES
chrI	1072177	1072269	YES
chrI	1072290	1072323	YES
chrI	1072457	1072606	YES
chrI	1073552	1073683	No
chrI	1090843	1090915	YES
chrI	1090969	1091040	No
chrI	1101154	1101289	YES
chrI	1101538	1101673	No
chrI	1105530	1105549	No
chrI	1105569	1105588	No
chrI	1107301	1107428	No
chrI	1107889	1107920	No
chrI	1108240	1108335	No
chrI	1108689	1108720	No
chrI	1114592	1114635	No
chrI	1114738	1114780	No
chrI	1116888	1119273	No
chrI	1119794	1122170	No
chrI	1125262	1125363	No
chrI	1125398	1125500	No
chrI	1130223	1130254	No
chrI	1130311	1130352	No
chrI	1130354	1130398	No
chrI	1130516	1130554	No
chrI	1130625	1130659	No
chrI	1132481	1132627	No
chrI	1132864	1132895	No
chrI	1132929	1132985	No
chrI	1133025	1133172	No
chrI	1136032	1136280	No
chrI	1136290	1136357	No
chrI	1138261	1138755	YES
chrI	1138854	1139468	YES
chrI	1139471	1139597	YES
chrI	1140318	1140434	No
chrI	1140671	1140786	YES
chrI	1143618	1145016	YES
chrI	1145129	1145209	No
chrI	1145347	1145532	YES
chrI	1146505	1146746	YES
chrI	1146763	1146990	YES
chrI	1147847	1148362	YES
chrI	1148389	1148907	YES
chrI	1149021	1149415	YES
chrI	1149446	1149840	YES
chrI	1151248	1151639	YES
chrI	1151648	1152039	YES
chrI	1154584	1154950	YES
chrI	1154977	1155341	YES
chrI	1158649	1158833	No
chrI	1158853	1159037	No
chrI	1160134	1160155	No
chrI	1160307	1160328	No
chrI	1160467	1160492	No
chrI	1160825	1160850	No
chrI	1160970	1161350	YES
chrI	1161377	1161762	YES
chrI	1162035	1162463	YES
chrI	1163207	1163905	YES
chrI	1163921	1164137	YES
chrI	1164139	1164475	YES
chrI	1164816	1165064	YES
chrI	1165083	1165331	YES
chrI	1168241	1168390	YES
chrI	1168496	1168648	YES
chrI	1170995	1171120	No
chrI	1171161	1171217	No
chrI	1171274	1171330	No
chrI	1171373	1171496	YES
chrI	1171541	1172480	YES
chrI	1172498	1173520	YES
chrI	1174422	1174804	No
chrI	1174857	1175220	YES
chrI	1177065	1177090	YES
chrI	1177112	1177277	YES
chrI	1177293	1177461	YES
chrI	1177466	1177492	YES
chrI	1179423	1179700	YES
chrI	1179712	1179990	YES
chrI	1181425	1181723	YES
chrI	1181819	1182115	YES
chrI	1183904	1184101	YES
chrI	1184169	1184366	YES
chrI	1185643	1185692	No
chrI	1185705	1185754	No
chrI	1187757	1188326	YES
chrI	1188340	1188913	YES
chrI	1191850	1191896	No
chrI	1192106	1192227	No
chrI	1192605	1192656	No
chrI	1192833	1192897	No
chrI	1192976	1193092	No
chrI	1194623	1194748	YES
chrI	1194784	1194901	YES
chrI	1194908	1194939	YES
chrI	1197738	1197767	No
chrI	1197842	1198130	YES
chrI	1198138	1198425	YES
chrI	1198491	1198520	YES
chrI	1201402	1201608	YES
chrI	1201637	1201861	YES
chrI	1202093	1202499	YES
chrI	1202603	1203010	YES
chrI	1203148	1203171	YES
chrI	1203177	1203200	YES
chrI	1203755	1203851	No
chrI	1203925	1204129	YES
chrI	1204305	1204395	YES
chrI	1204396	1204600	YES
chrI	1205011	1205192	YES
chrI	1205206	1205349	YES
chrI	1205390	1205463	YES
chrI	1205658	1205753	YES
chrI	1205755	1205778	No
chrI	1205780	1205803	No
chrI	1205805	1205828	No
chrI	1205830	1205912	YES
chrI	1205924	1206074	YES
chrI	1206088	1206195	No
chrI	1206216	1206250	No
chrI	1206256	1206276	No
chrI	1206397	1206451	YES
chrI	1206497	1206874	YES
chrI	1206901	1207278	YES
chrI	1211165	1211184	YES
chrI	1211259	1211278	YES
chrI	1215316	1215443	YES
chrI	1215962	1216089	YES
chrI	1216218	1216316	YES
chrI	1216330	1216426	YES
chrI	1216567	1216825	YES
chrI	1216853	1217112	YES
chrI	1218059	1218080	No
chrI	1218707	1218729	No
chrI	1218805	1218827	No
chrI	1219503	1219525	No
chrI	1219778	1219817	YES
chrI	1219906	1220204	YES
chrI	1220223	1220520	YES
chrI	1221358	1221487	YES
chrI	1221503	1221631	YES
chrI	1221794	1222124	No
chrI	1222151	1222510	No
chrI	1222526	1222630	YES
chrI	1224509	1224528	YES
chrI	1224609	1224628	No
chrI	1225005	1225024	YES
chrI	1225095	1225114	YES
chrI	1225687	1225876	YES
chrI	1225888	1226070	YES
chrI	1226462	1226589	YES
chrI	1227134	1227249	YES
chrI	1227444	1227525	YES
chrI	1227581	1227662	YES
chrI	1228626	1228790	YES
chrI	1229694	1229862	YES
chrI	1231981	1232048	No
chrI	1232134	1232201	No
chrI	1233145	1233211	YES
chrI	1233230	1233319	YES
chrI	1233336	1233425	No
chrI	1233513	1233579	YES
chrI	1233917	1234167	No
chrI	1234197	1234447	YES
chrI	1235123	1235331	YES
chrI	1235357	1235572	YES
chrI	1235580	1235715	YES
chrI	1235747	1235875	YES
chrI	1236380	1237143	YES
chrI	1237163	1237918	No
chrI	1238162	1238212	No
chrI	1238457	1238498	No
chrI	1238667	1238705	No
chrI	1238751	1238802	No
chrI	1238933	1238960	No
chrI	1239850	1239956	No
chrI	1240001	1240111	No
chrI	1241795	1241842	No
chrI	1242115	1242162	No
chrI	1243233	1243526	YES
chrI	1243541	1243833	YES
chrI	1244001	1244262	YES
chrI	1244279	1244564	YES
chrI	1244570	1244858	YES
chrI	1244871	1245169	YES
chrI	1245405	1245787	YES
chrI	1245814	1246195	YES
chrI	1246509	1246568	No
chrI	1246595	1246654	No
chrI	1248597	1248622	No
chrI	1248677	1248703	No
chrI	1249349	1249732	No
chrI	1249759	1250143	YES
chrI	1251262	1251292	No
chrI	1251293	1251324	No
chrI	1251576	1251599	No
chrI	1251621	1251644	No
chrI	1252568	1252855	YES
chrI	1252859	1253147	YES
chrI	1253752	1254045	No
chrI	1254060	1254355	YES
chrI	1255590	1255642	No
chrI	1255751	1255804	No
chrI	1256787	1256808	YES
chrI	1256923	1256944	YES
chrI	1257089	1257366	YES
chrI	1257385	1257664	No
chrI	1258855	1259149	YES
chrI	1259162	1259456	YES
chrI	1260262	1260431	YES
chrI	1260686	1260855	YES
chrI	1260942	1261014	YES
chrI	1261227	1261249	YES
chrI	1261872	1261931	YES
chrI	1261949	1262048	YES
chrI	1262090	1262189	YES
chrI	1262227	1262283	YES
chrI	1263443	1263619	YES
chrI	1264463	1264648	YES
chrI	1265003	1265181	YES
chrI	1265670	1265846	YES
chrI	1265950	1265987	YES
chrI	1266176	1266214	YES
chrI	1275666	1276036	No
chrI	1276228	1276599	No
chrI	1281326	1281425	No
chrI	1281720	1281745	No
chrI	1281771	1281859	No
chrI	1282377	1282476	No
chrI	1282493	1282530	No
chrI	1282557	1282624	No
chrI	1296882	1297020	No
chrI	1297052	1297153	No
chrI	1297265	1297367	No
chrI	1297384	1297522	No
chrI	1299256	1299293	No
chrI	1299564	1299600	No
chrI	1304767	1305249	No
chrI	1305923	1305969	YES
chrI	1306212	1306691	YES
chrI	1313281	1313311	No
chrI	1313605	1313636	YES
chrI	1319605	1319750	YES
chrI	1320722	1320902	YES
chrI	1321126	1321284	YES
chrI	1321587	1321645	YES
chrI	1324268	1324328	YES
chrI	1324441	1324502	YES
chrI	1330064	1330095	No
chrI	1330139	1330206	No
chrI	1330553	1330622	No
chrI	1331090	1331113	No
chrI	1331120	1331143	No
chrI	1335678	1335829	No
chrI	1336415	1336568	No
chrI	1337464	1337686	YES
chrI	1338458	1338690	No
chrI	1344801	1344891	YES
chrI	1344999	1345092	YES
chrI	1345231	1345411	No
chrI	1345523	1345645	YES
chrI	1345676	1345798	YES
chrI	1345808	1345991	YES
chrI	1347204	1347275	YES
chrI	1347570	1347641	YES
chrI	1347645	1348038	YES
chrI	1348046	1348438	YES
chrI	1348761	1349352	YES
chrI	1349394	1349977	YES
chrI	1350118	1350415	YES
chrI	1350428	1350726	YES
chrI	1352066	1352088	YES
chrI	1352384	1352406	No
chrI	1352477	1352496	No
chrI	1352735	1352798	No
chrI	1352835	1352861	YES
chrI	1352865	1352908	YES
chrI	1352962	1353071	No
chrI	1353128	1353457	YES
chrI	1353503	1353584	YES
chrI	1353714	1353914	YES
chrI	1354520	1354665	No
chrI	1354666	1354810	YES
chrI	1354892	1354917	No
chrI	1355296	1355665	No
chrI	1355682	1356052	YES
chrI	1356693	1357085	YES
chrI	1357226	1357830	YES
chrI	1358439	1358980	YES
chrI	1359037	1359576	YES
chrI	1361821	1362076	YES
chrI	1362111	1362371	No
chrI	1363970	1364134	YES
chrI	1364209	1364362	YES
chrI	1364659	1364893	YES
chrI	1364929	1365175	YES
chrI	1365792	1366261	YES
chrI	1366288	1366825	YES
chrI	1366968	1366995	YES
chrI	1367957	1368151	YES
chrI	1368504	1368698	YES
chrI	1369027	1369409	YES
chrI	1369436	1369818	YES
chrI	1370308	1370426	YES
chrI	1370486	1370606	YES
chrI	1375106	1375244	YES
chrI	1375263	1375403	YES
chrI	1375997	1376073	YES
chrI	1376078	1376156	YES
chrI	1376198	1376589	YES
chrI	1376598	1376989	YES
chrI	1377506	1377848	YES
chrI	1377903	1378246	YES
chrI	1379795	1379856	YES
chrI	1379890	1379914	YES
chrI	1379923	1380035	YES
chrI	1380051	1380159	No
chrI	1380168	1380234	YES
chrI	1380696	1380720	YES
chrI	1380864	1380930	No
chrI	1381044	1381108	YES
chrI	1381437	1381481	No
chrI	1381595	1382022	YES
chrI	1382031	1382885	YES
chrI	1382907	1383355	YES
chrI	1386462	1386856	YES
chrI	1387401	1387849	YES
chrI	1388424	1388803	No
chrI	1388830	1389207	YES
chrI	1389740	1390220	No
chrI	1390252	1390284	No
chrI	1390540	1391122	YES
chrI	1394799	1394940	No
chrI	1395043	1395147	No
chrI	1395176	1395290	No
chrI	1395436	1395740	No
chrI	1397726	1397894	No
chrI	1397947	1398038	No
chrI	1398062	1398098	No
chrI	1398174	1398223	No
chrI	1398427	1398493	No
chrI	1398558	1398606	No
chrI	1398822	1398845	No
chrI	1398850	1398873	No
chrI	1399555	1399901	YES
chrI	1399988	1400334	YES
chrI	1400499	1400795	YES
chrI	1400809	1401079	YES
chrI	1401115	1401162	YES
chrI	1401166	1401423	YES
chrI	1401510	1401797	No
chrI	1401888	1402008	YES
chrI	1403268	1403352	YES
chrI	1403516	1403552	YES
chrI	1403990	1404073	YES
chrI	1404638	1404658	YES
chrI	1405127	1405147	YES
chrI	1406652	1406674	No
chrI	1406748	1406770	No
chrI	1407206	1407268	YES
chrI	1407703	1407828	No
chrI	1407837	1407961	YES
chrI	1408139	1408159	YES
chrI	1408212	1408274	No
chrI	1409655	1409675	No
chrI	1409732	1409752	No
chrI	1417405	1417825	YES
chrI	1417832	1418505	YES
chrI	1418546	1418790	No
chrI	1419422	1419805	YES
chrI	1419832	1420161	YES
chrI	1422101	1422673	YES
chrI	1423086	1424327	YES
chrI	1425454	1425519	YES
chrI	1425543	1425605	YES
chrI	1425622	1425666	YES
chrI	1425747	1425791	No
chrI	1425954	1426219	YES
chrI	1426323	1426587	YES
chrI	1426768	1426820	YES
chrI	1426893	1426945	YES
chrI	1428077	1428153	No
chrI	1428204	1428278	YES
chrI	1434297	1434571	YES
chrI	1434639	1434900	YES
chrI	1437909	1439014	YES
chrI	1439142	1440201	YES
chrI	1440203	1440335	No
chrI	1441347	1441379	No
chrI	1441393	1441470	No
chrI	1441563	1441602	No
chrI	1441764	1441836	YES
chrI	1442200	1442237	No
chrI	1442301	1442333	No
chrI	1444810	1444998	No
chrI	1445573	1445765	No
chrI	1446070	1446205	No
chrI	1458004	1458232	No
chrI	1458543	1458782	No
chrI	1465792	1465821	No
chrI	1465827	1465874	No
chrI	1465903	1465950	No
chrI	1465972	1466001	No
chrI	1470370	1470571	No
chrI	1470660	1470862	No
chrI	1471671	1471919	No
chrI	1472090	1472135	No
chrI	1472339	1472371	No
chrI	1472457	1472502	No
chrI	1472735	1473054	No
chrI	1481098	1481129	No
chrI	1481335	1481366	No
chrI	1486382	1486401	No
chrI	1486477	1486496	No
chrI	1491530	1491808	No
chrI	1491822	1492100	No
chrI	1492604	1492776	YES
chrI	1492779	1492941	No
chrI	1493501	1493546	No
chrI	1493596	1493643	YES
chrI	1493681	1494065	YES
chrI	1494093	1494474	YES
chrI	1496078	1496912	YES
chrI	1497401	1497739	YES
chrI	1498083	1498106	No
chrI	1498414	1498437	YES
chrI	1501339	1501574	YES
chrI	1501792	1502524	YES
chrI	1503185	1503381	YES
chrI	1503417	1503613	YES
chrI	1504969	1505019	No
chrI	1505098	1505146	No
chrI	1505335	1505559	YES
chrI	1505560	1505801	YES
chrI	1507608	1507890	YES
chrI	1507907	1508190	No
chrI	1508465	1508608	YES
chrI	1508619	1508704	YES
chrI	1508806	1508891	YES
chrI	1509007	1509698	No
chrI	1509725	1509868	YES
chrI	1510153	1510180	No
chrI	1510297	1510324	YES
chrI	1510598	1510874	YES
chrI	1510887	1511174	YES
chrI	1512052	1512317	YES
chrI	1512334	1512601	YES
chrI	1512636	1512699	YES
chrI	1512816	1512880	YES
chrI	1513103	1513467	YES
chrI	1513487	1513853	No
chrI	1515887	1516155	YES
chrI	1516188	1516460	YES
chrI	1516479	1516518	No
chrI	1516735	1516774	No
chrI	1518175	1518214	No
chrI	1518226	1518335	No
chrI	1518470	1518513	YES
chrI	1518604	1518726	YES
chrI	1518802	1518882	YES
chrI	1518890	1518971	YES
chrI	1519309	1519689	YES
chrI	1519690	1519713	YES
chrI	1519748	1520128	YES
chrI	1520350	1520782	YES
chrI	1520844	1521277	YES
chrI	1521364	1521746	No
chrI	1521773	1522153	YES
chrI	1522564	1522612	No
chrI	1522883	1522945	No
chrI	1523017	1523097	No
chrI	1523799	1524183	No
chrI	1524764	1525513	YES
chrI	1526282	1526598	YES
chrI	1526622	1526941	YES
chrI	1527481	1527506	No
chrI	1527740	1528235	YES
chrI	1528332	1528801	YES
chrI	1531387	1531632	No
chrI	1531648	1531895	YES
chrI	1532425	1532495	No
chrI	1532645	1532715	No
chrI	1536317	1536347	No
chrI	1536348	1536378	No
chrI	1536422	1536713	YES
chrI	1536732	1537019	YES
chrI	1537860	1537892	No
chrI	1537939	1538009	No
chrI	1538035	1538108	No
chrI	1538162	1538194	No
chrI	1538350	1538637	YES
chrI	1538654	1538948	YES
chrI	1539582	1539635	No
chrI	1539792	1539818	No
chrI	1539902	1540021	No
chrI	1540051	1540183	No
chrI	1540242	1540275	No
chrI	1540327	1540353	No
chrI	1540375	1540488	No
chrI	1541895	1541990	YES
chrI	1542123	1542218	YES
chrI	1542547	1542772	YES
chrI	1543120	1543350	YES
chrI	1544129	1544178	YES
chrI	1544534	1544694	No
chrI	1545394	1545579	No
chrI	1545863	1545971	YES
chrI	1546186	1546296	YES
chrI	1546362	1546410	No
chrI	1546649	1546718	No
chrI	1548627	1548646	YES
chrI	1548716	1548735	No
chrI	1553976	1554098	YES
chrI	1554162	1554286	YES
chrI	1554448	1554485	YES
chrI	1554584	1554634	YES
chrI	1555316	1555374	YES
chrI	1555376	1555397	YES
chrI	1555436	1555545	YES
chrI	1555565	1555639	No
chrI	1558111	1558197	YES
chrI	1558297	1558383	No
chrI	1559742	1559937	YES
chrI	1559948	1560143	YES
chrI	1560656	1560936	YES
chrI	1560977	1561255	YES
chrI	1564308	1564331	YES
chrI	1564404	1564427	YES
chrI	1564620	1564642	YES
chrI	1565592	1565723	YES
chrI	1565761	1566101	YES
chrI	1566278	1566738	YES
chrI	1567147	1567166	YES
chrI	1567246	1567265	YES
chrI	1568390	1568552	No
chrI	1568553	1568716	YES
chrI	1568872	1568910	YES
chrI	1568918	1568951	YES
chrI	1568983	1569131	YES
chrI	1569193	1569346	YES
chrI	1569406	1569474	YES
chrI	1569482	1569858	YES
chrI	1569898	1570275	YES
chrI	1570843	1570992	YES
chrI	1571092	1571225	YES
chrI	1571228	1571254	YES
chrI	1571264	1571533	YES
chrI	1571549	1571819	YES
chrI	1572518	1572938	YES
chrI	1572951	1573416	YES
chrI	1573456	1573564	YES
chrI	1573850	1574019	YES
chrI	1574660	1574880	YES
chrI	1574919	1575165	YES
chrI	1575963	1576261	YES
chrI	1576274	1576574	YES
chrI	1576720	1576981	YES
chrI	1577026	1577284	YES
chrI	1578016	1578296	YES
chrI	1578313	1578596	YES
chrI	1580395	1580616	YES
chrI	1580996	1581150	No
chrI	1581559	1581799	YES
chrI	1583862	1583941	No
chrI	1583968	1583991	No
chrI	1584087	1584110	No
chrI	1584119	1584198	No
chrI	1585653	1585684	No
chrI	1585850	1585880	No
chrI	1587243	1587518	No
chrI	1587631	1587763	No
chrI	1587888	1588031	No
chrI	1588867	1588890	No
chrI	1589276	1589299	No
chrI	1590232	1590293	No
chrI	1590579	1590640	No
chrI	1592730	1592937	No
chrI	1592954	1593052	No
chrI	1593126	1593227	No
chrI	1594333	1594411	No
chrI	1594427	1594446	No
chrI	1594490	1594569	No
chrI	1598905	1599139	No
chrI	1599240	1599265	No
chrI	1599648	1599673	No
chrI	1599679	1599898	No
chrI	1602671	1603065	No
chrI	1603107	1603497	No
chrI	1603526	1603653	No
chrI	1603723	1603830	YES
chrI	1603837	1603882	YES
chrI	1604194	1604263	No
chrI	1604313	1604358	No
chrI	1605535	1605582	No
chrI	1606177	1606222	No
chrI	1606909	1606955	No
chrI	1606978	1607157	No
chrI	1607158	1607224	No
chrI	1607451	1607498	No
chrI	1607513	1607595	No
chrI	1612366	1612496	YES
chrI	1612598	1612815	YES
chrI	1613104	1613230	No
chrI	1613231	1613266	No
chrI	1613905	1614289	YES
chrI	1614316	1614697	YES
chrI	1615308	1615544	No
chrI	1615571	1615801	YES
chrI	1616492	1617253	No
chrI	1617432	1617796	No
chrI	1620018	1620598	No
chrI	1620693	1620809	No
chrI	1620813	1620936	No
chrI	1622689	1622899	No
chrI	1622922	1623118	No
chrI	1623532	1623644	No
chrI	1623948	1624065	YES
chrI	1624075	1624096	No
chrI	1625104	1625183	No
chrI	1625262	1625342	No
chrI	1625906	1625952	No
chrI	1626095	1626114	No
chrI	1626191	1626212	No
chrI	1626706	1626780	No
chrI	1626838	1627018	YES
chrI	1627393	1627558	No
chrI	1629718	1629905	YES
chrI	1630193	1630372	YES
chrI	1631060	1631345	YES
chrI	1631375	1631660	YES
chrI	1631922	1632179	No
chrI	1632489	1632654	No
chrI	1635025	1635134	No
chrI	1635225	1635335	YES
chrI	1643579	1643630	No
chrI	1643701	1643756	No
chrI	1644170	1644299	No
chrI	1644427	1644558	No
chrI	1646553	1646603	YES
chrI	1646676	1646726	No
chrI	1647326	1647492	YES
chrI	1647543	1647591	YES
chrI	1647663	1647711	YES
chrI	1647762	1647919	YES
chrI	1648952	1649037	No
chrI	1649129	1649212	No
chrI	1650890	1650928	No
chrI	1651026	1651064	YES
chrI	1664452	1664773	No
chrI	1664989	1665309	No
chrI	1665429	1665559	No
chrI	1665560	1665603	No
chrI	1666040	1666083	No
chrI	1666107	1666238	No
chrI	1670516	1670712	No
chrI	1671459	1671657	No
chrI	1673324	1673416	No
chrI	1673432	1673470	No
chrI	1673496	1673550	No
chrI	1674326	1674539	YES
chrI	1674579	1674793	YES
chrI	1675517	1675538	No
chrI	1675602	1675623	No
chrI	1678285	1678487	No
chrI	1678670	1678857	No
chrI	1679573	1679592	No
chrI	1679670	1679689	No
chrI	1681249	1681357	No
chrI	1681395	1681501	No
chrI	1683550	1683599	No
chrI	1683609	1683699	No
chrI	1684078	1684143	No
chrI	1684541	1684591	No
chrI	1684666	1684716	No
chrI	1685507	1685552	No
chrI	1686165	1686210	YES
chrI	1686723	1686820	YES
chrI	1686980	1687078	No
chrI	1688159	1688289	YES
chrI	1688295	1688588	YES
chrI	1688732	1688891	YES
chrI	1689776	1689898	YES
chrI	1689992	1690112	No
chrI	1690724	1690807	No
chrI	1690863	1690946	No
chrI	1692129	1692302	YES
chrI	1692369	1692455	YES
chrI	1692546	1692629	YES
chrI	1692676	1692862	YES
chrI	1695704	1695805	YES
chrI	1695866	1695899	YES
chrI	1695978	1696012	YES
chrI	1696028	1696127	YES
chrI	1696191	1696478	YES
chrI	1696494	1696786	YES
chrI	1697186	1697469	YES
chrI	1697492	1697777	YES
chrI	1698839	1698877	YES
chrI	1699424	1699480	YES
chrI	1699547	1699603	YES
chrI	1702812	1703026	YES
chrI	1703034	1703251	YES
chrI	1703265	1703560	YES
chrI	1703594	1703893	YES
chrI	1706341	1706597	YES
chrI	1706638	1706893	YES
chrI	1708028	1708073	YES
chrI	1708138	1708181	YES
chrI	1708716	1708985	YES
chrI	1709015	1709066	No
chrI	1709178	1709217	No
chrI	1709218	1709485	YES
chrI	1713389	1713439	No
chrI	1713493	1713564	No
chrI	1713593	1713662	No
chrI	1713719	1713839	No
chrI	1713933	1714022	No
chrI	1714073	1714196	No
chrI	1714250	1714467	No
chrI	1714554	1714611	No
chrI	1714812	1714905	No
chrI	1714962	1714981	No
chrI	1716630	1716765	No
chrI	1716875	1716910	No
chrI	1717053	1717088	No
chrI	1717159	1717295	No
chrI	1718445	1718568	No
chrI	1718643	1718768	YES
chrI	1719656	1719687	YES
chrI	1719724	1719750	YES
chrI	1720229	1720271	No
chrI	1720336	1720367	No
chrI	1720920	1721066	YES
chrI	1721274	1721422	YES
chrI	1722642	1722676	No
chrI	1722709	1722766	No
chrI	1722767	1722823	No
chrI	1723043	1723086	No
chrI	1723330	1723373	YES
chrI	1725459	1725698	YES
chrI	1725771	1726014	YES
chrI	1727707	1727742	YES
chrI	1727775	1727833	YES
chrI	1727834	1727873	YES
chrI	1729279	1729309	No
chrI	1729442	1729471	YES
chrI	1730330	1730458	YES
chrI	1730484	1730610	YES
chrI	1731721	1731799	YES
chrI	1731908	1731975	YES
chrI	1732002	1732080	YES
chrI	1732373	1732451	YES
chrI	1732453	1732521	YES
chrI	1733426	1733565	YES
chrI	1733600	1733737	YES
chrI	1741067	1741088	No
chrI	1741144	1741165	No
chrI	1741724	1741991	No
chrI	1742048	1742291	No
chrI	1742361	1742390	YES
chrI	1743174	1743193	No
chrI	1743375	1743395	No
chrI	1743645	1743664	No
chrI	1744007	1744027	No
chrI	1744079	1744375	YES
chrI	1744385	1744690	YES
chrI	1744892	1745160	YES
chrI	1745217	1745485	No
chrI	1748130	1748172	No
chrI	1748751	1748792	No
chrI	1748901	1749097	YES
chrI	1749110	1749306	YES
chrI	1749781	1750169	YES
chrI	1750201	1750579	YES
chrI	1751885	1752185	YES
chrI	1752242	1752522	YES
chrI	1752554	1752580	YES
chrI	1753017	1753470	YES
chrI	1753482	1753943	YES
chrI	1769314	1769505	No
chrI	1769556	1769746	YES
chrI	1773772	1774139	YES
chrI	1774184	1774554	YES
chrI	1774560	1774651	YES
chrI	1774766	1774801	YES
chrI	1774871	1774921	YES
chrI	1774943	1775034	YES
chrI	1775320	1775374	YES
chrI	1776330	1776700	YES
chrI	1776733	1777109	YES
chrI	1779215	1779239	No
chrI	1779323	1779347	No
chrI	1782093	1782151	No
chrI	1782379	1782435	No
chrI	1782853	1782878	No
chrI	1783158	1783185	No
chrI	1783279	1783304	No
chrI	1783469	1783494	No
chrI	1785751	1786005	YES
chrI	1786045	1786290	YES
chrI	1786669	1786827	No
chrI	1786843	1786999	YES
chrI	1790238	1790318	No
chrI	1790333	1790413	No
chrI	1792280	1792299	No
chrI	1792371	1792390	No
chrI	1807105	1807315	No
chrI	1808312	1808522	No
chrI	1810298	1810418	No
chrI	1810596	1810688	No
chrI	1810752	1810844	No
chrI	1810864	1810975	No
chrI	1818161	1818181	No
chrI	1818257	1818277	No
chrI	1819521	1819844	No
chrI	1819940	1820257	No
chrI	1820840	1821016	No
chrI	1821103	1821190	No
chrI	1821573	1821668	No
chrI	1821703	1821802	No
chrI	1821883	1822083	No
chrI	1824563	1824889	YES
chrI	1824946	1825280	YES
chrI	1826003	1826131	No
chrI	1826157	1826287	No
chrI	1828348	1828429	No
chrI	1828731	1828812	No
chrI	1829001	1829054	No
chrI	1829096	1829148	No
chrI	1829866	1830149	No
chrI	1830155	1830423	No
chrI	1830809	1831110	No
chrI	1831257	1831569	No
chrI	1837691	1837844	YES
chrI	1838464	1838606	YES
chrI	1844287	1844313	No
chrI	1844982	1845008	No
chrI	1845629	1845757	YES
chrI	1845817	1845941	No
chrI	1846795	1846985	No
chrI	1847255	1847318	No
chrI	1847493	1847556	No
chrI	1847694	1847875	YES
chrI	1847926	1847945	No
chrI	1848679	1848698	No
chrI	1849139	1849189	No
chrI	1849222	1849347	No
chrI	1849704	1849829	YES
chrI	1849830	1849880	YES
chrI	1854035	1854361	No
chrI	1854419	1854750	No
chrI	1861753	1861778	No
chrI	1862323	1862348	No
chrI	1863369	1863464	YES
chrI	1863573	1864278	YES
chrI	1864316	1864404	YES
chrI	1864425	1864515	YES
chrI	1864589	1865200	YES
chrI	1867227	1867345	YES
chrI	1868230	1868338	YES
chrI	1868539	1868581	YES
chrI	1869081	1869123	YES
chrI	1869370	1869587	No
chrI	1869608	1869826	No
chrI	1871296	1871481	YES
chrI	1871501	1871687	YES
chrI	1876959	1877102	YES
chrI	1877126	1877299	YES
chrI	1877359	1877558	YES
chrI	1878035	1878152	YES
chrI	1878263	1878356	YES
chrI	1878518	1878809	YES
chrI	1878862	1878905	YES
chrI	1879441	1879486	YES
chrI	1880790	1880810	YES
chrI	1880841	1880861	YES
chrI	1882337	1882442	YES
chrI	1882521	1882629	YES
chrI	1885853	1886169	No
chrI	1886205	1886519	No
chrI	1886942	1888637	No
chrI	1888792	1890488	No
chrI	1891861	1891949	No
chrI	1892085	1892176	No
chrI	1894134	1894197	No
chrI	1894224	1894316	No
chrI	1894318	1894381	No
chrI	1894436	1894526	No
chrI	1895764	1896035	YES
chrI	1896092	1896362	YES
chrI	1897548	1897941	No
chrI	1897996	1898388	No
chrI	1898399	1898641	YES
chrI	1898676	1898928	YES
chrI	1899636	1900042	YES
chrI	1900505	1901532	YES
chrI	1901640	1902278	YES
chrI	1903106	1903140	No
chrI	1903300	1903334	No
chrI	1903571	1903606	No
chrI	1903763	1903798	No
chrI	1904091	1904188	No
chrI	1904205	1904304	YES
chrI	1904692	1904939	No
chrI	1904957	1905074	No
chrI	1905127	1905222	No
chrI	1905619	1905817	No
chrI	1907147	1907654	YES
chrI	1907699	1908152	YES
chrI	1911026	1911184	YES
chrI	1912041	1912197	YES
chrI	1912360	1912460	YES
chrI	1912483	1912918	YES
chrI	1912935	1913287	YES
chrI	1915403	1915512	YES
chrI	1915609	1915781	No
chrI	1916218	1916276	YES
chrI	1916376	1916438	YES
chrI	1916467	1916506	No
chrI	1916566	1916605	No
chrI	1916609	1916671	No
chrI	1916703	1916870	YES
chrI	1917167	1917410	YES
chrI	1917419	1917664	YES
chrI	1918415	1918630	YES
chrI	1918633	1918848	YES
chrI	1921662	1921687	No
chrI	1921696	1921722	No
chrI	1921767	1921794	No
chrI	1921801	1921827	No
chrI	1921836	1921862	No
chrI	1921871	1921899	No
chrI	1921908	1921934	No
chrI	1922304	1922332	No
chrI	1923770	1923959	No
chrI	1923969	1924167	No
chrI	1926746	1926843	No
chrI	1926967	1927064	No
chrI	1927369	1927718	No
chrI	1927722	1928101	No
chrI	1928718	1928889	No
chrI	1929038	1929414	YES
chrI	1930030	1930250	No
chrI	1930303	1930463	No
chrI	1930849	1930869	No
chrI	1930945	1930966	YES
chrI	1931488	1931507	No
chrI	1931572	1931595	No
chrI	1932107	1932130	YES
chrI	1932161	1932180	YES
chrI	1932618	1932719	YES
chrI	1932818	1932919	YES
chrI	1933201	1933221	No
chrI	1933488	1933508	No
chrI	1934010	1934031	YES
chrI	1934388	1934409	No
chrI	1939659	1939822	No
chrI	1940514	1940677	No
chrI	1945336	1945369	No
chrI	1945410	1945429	No
chrI	1945900	1945934	No
chrI	1946010	1946044	No
chrI	1946155	1946178	No
chrI	1946249	1946272	No
chrI	1946634	1946655	No
chrI	1946995	1947016	No
chrI	1947451	1947747	No
chrI	1947757	1948019	No
chrI	1951351	1951781	YES
chrI	1951801	1952229	YES
chrI	1952787	1952860	No
chrI	1952921	1952957	No
chrI	1953702	1953737	No
chrI	1953743	1954388	YES
chrI	1954405	1955153	YES
chrI	1956197	1956249	No
chrI	1956505	1956838	YES
chrI	1957199	1957825	YES
chrI	1957925	1957965	YES
chrI	1959783	1959802	No
chrI	1959849	1959948	No
chrI	1959964	1960041	No
chrI	1960053	1960227	No
chrI	1960548	1960688	No
chrI	1960842	1960943	No
chrI	1961225	1961244	No
chrI	1961360	1961479	No
chrI	1962073	1962092	YES
chrI	1962393	1962412	YES
chrI	1962695	1962806	YES
chrI	1962834	1962945	YES
chrI	1964261	1964486	YES
chrI	1964536	1964760	YES
chrI	1965140	1965205	No
chrI	1965618	1965683	No
chrI	1965794	1965828	No
chrI	1965921	1965980	No
chrI	1966015	1966091	No
chrI	1966783	1966821	YES
chrI	1967525	1967563	YES
chrI	1968918	1969287	YES
chrI	1969315	1969697	YES
chrI	1970508	1970972	No
chrI	1970989	1971637	YES
chrI	1971827	1971971	YES
chrI	1971993	1972026	YES
chrI	1972031	1972182	No
chrI	1972267	1972396	No
chrI	1972562	1972628	YES
chrI	1975120	1975365	YES
chrI	1975603	1975644	No
chrI	1975730	1975771	YES
chrI	1975969	1976217	No
chrI	1978693	1979028	No
chrI	1979085	1979418	YES
chrI	1979623	1980102	YES
chrI	1980685	1981325	No
chrI	1981963	1982100	No
chrI	1982595	1982812	No
chrI	1982883	1983102	No
chrI	1983580	1983642	No
chrI	1983717	1983781	No
chrI	1987021	1987065	No
chrI	1987094	1987256	No
chrI	1987303	1987467	No
chrI	1987483	1987523	No
chrI	1987933	1987952	YES
chrI	1988591	1988610	YES
chrI	1989074	1989121	No
chrI	1989187	1989234	No
chrI	1989802	1989852	No
chrI	1989865	1989917	No
chrI	1993685	1993928	YES
chrI	1993945	1994190	YES
chrI	1995587	1995664	No
chrI	1995678	1995755	No
chrI	1996349	1996677	YES
chrI	1996689	1997018	YES
chrI	2000343	2000515	No
chrI	2000523	2000688	YES
chrI	2001277	2001343	No
chrI	2001434	2001500	YES
chrI	2002233	2002457	YES
chrI	2002481	2002705	YES
chrI	2002706	2003087	YES
chrI	2003114	2003477	YES
chrI	2004378	2004659	YES
chrI	2004677	2004957	YES
chrI	2005245	2005266	No
chrI	2005339	2005363	No
chrI	2005952	2005989	No
chrI	2005994	2006031	No
chrI	2006046	2006083	YES
chrI	2006403	2006557	YES
chrI	2006923	2007094	YES
chrI	2007138	2007308	YES
chrI	2007619	2007774	YES
chrI	2008036	2008425	YES
chrI	2008833	2008912	YES
chrI	2009105	2009490	YES
chrI	2009727	2009820	YES
chrI	2011718	2011739	No
chrI	2011815	2011836	No
chrI	2014249	2014365	No
chrI	2014429	2014539	No
chrI	2017815	2018093	No
chrI	2018288	2018566	No
chrI	2018650	2018880	YES
chrI	2019172	2019395	YES
chrI	2020302	2020339	No
chrI	2020457	2020492	No
chrI	2021026	2021229	No
chrI	2021751	2021966	No
chrI	2022494	2022547	No
chrI	2022612	2022651	No
chrI	2022978	2023046	No
chrI	2030540	2030750	No
chrI	2031026	2031252	No
chrI	2031422	2031615	No
chrI	2032229	2032295	No
chrI	2032299	2032376	No
chrI	2032425	2032475	YES
chrI	2033835	2033933	YES
chrI	2034013	2034111	YES
chrI	2034839	2035165	YES
chrI	2035235	2035566	YES
chrI	2036031	2036354	No
chrI	2036445	2036555	No
chrI	2039943	2040053	No
chrI	2040144	2040255	No
chrI	2040697	2040740	YES
chrI	2040962	2041005	No
chrI	2042770	2043516	YES
chrI	2044037	2044777	YES
chrI	2045968	2047207	YES
chrI	2047278	2048444	YES
chrI	2053858	2053879	No
chrI	2054346	2054367	No
chrI	2062115	2062225	YES
chrI	2062239	2062323	YES
chrI	2062351	2062434	YES
chrI	2062621	2062731	YES
chrI	2066026	2066173	No
chrI	2066187	2066335	No
chrI	2066568	2066617	No
chrI	2067314	2067385	No
chrI	2067914	2067983	No
chrI	2072845	2073100	YES
chrI	2073148	2073404	YES
chrI	2073996	2074068	YES
chrI	2074112	2074235	YES
chrI	2074287	2074407	No
chrI	2074509	2074564	YES
chrI	2074584	2074607	YES
chrI	2075015	2075155	YES
chrI	2075227	2075374	YES
chrI	2075392	2075958	YES
chrI	2076259	2076805	YES
chrI	2077430	2077711	YES
chrI	2077746	2078027	YES
chrI	2078328	2078563	YES
chrI	2078581	2078822	YES
chrI	2079052	2079144	YES
chrI	2079198	2079235	YES
chrI	2079530	2079598	YES
chrI	2080216	2080460	YES
chrI	2080477	2080719	YES
chrI	2081353	2081398	YES
chrI	2081417	2081634	YES
chrI	2081651	2081905	YES
chrI	2082369	2082537	YES
chrI	2082610	2082778	YES
chrI	2083060	2083170	YES
chrI	2083180	2083341	YES
chrI	2083354	2083391	No
chrI	2083779	2084078	YES
chrI	2084098	2084279	YES
chrI	2084643	2084751	No
chrI	2084769	2084874	YES
chrI	2085958	2086006	YES
chrI	2086136	2086184	No
chrI	2086447	2086631	YES
chrI	2086737	2086921	No
chrI	2087488	2087548	YES
chrI	2087622	2087682	No
chrI	2088094	2088113	No
chrI	2088722	2088741	No
chrI	2088817	2088836	No
chrI	2089971	2090034	No
chrI	2090159	2090221	No
chrI	2091007	2091041	No
chrI	2091326	2091457	No
chrI	2091513	2091644	No
chrI	2091663	2091697	No
chrI	2091782	2091816	No
chrI	2092550	2092571	No
chrI	2092657	2092678	No
chrI	2092885	2093053	No
chrI	2093371	2093582	No
chrI	2093955	2094123	No
chrI	2094461	2094693	No
chrI	2094721	2094919	No
chrI	2095493	2095703	No
chrI	2095827	2096024	No
chrI	2096474	2096559	No
chrI	2096574	2096652	No
chrI	2097747	2098100	YES
chrI	2098105	2098545	YES
chrI	2098727	2098774	YES
chrI	2098778	2099396	YES
chrI	2099408	2100012	YES
chrI	2100129	2100343	YES
chrI	2100372	2100578	YES
chrI	2101342	2101377	YES
chrI	2101694	2101880	YES
chrI	2101901	2102084	YES
chrI	2103306	2103590	YES
chrI	2103603	2103897	YES
chrI	2104492	2104758	YES
chrI	2104766	2104856	No
chrI	2104890	2105142	YES
chrI	2105494	2105532	YES
chrI	2105539	2105945	YES
chrI	2105962	2106341	YES
chrI	2108717	2108769	YES
chrI	2108789	2108843	No
chrI	2109330	2109395	YES
chrI	2109550	2109615	No
chrI	2109718	2109777	YES
chrI	2110602	2110851	No
chrI	2110965	2111213	YES
chrI	2111805	2112031	YES
chrI	2112063	2112287	YES
chrI	2112902	2113183	No
chrI	2113215	2113506	YES
chrI	2114023	2114229	No
chrI	2114374	2114553	YES
chrI	2114559	2114701	YES
chrI	2114859	2114893	YES
chrI	2114895	2114967	YES
chrI	2114999	2115208	YES
chrI	2117436	2117465	YES
chrI	2117729	2117764	No
chrI	2117779	2117814	No
chrI	2117848	2117899	No
chrI	2118136	2118165	No
chrI	2120059	2120329	YES
chrI	2120346	2120633	YES
chrI	2121220	2121241	No
chrI	2121307	2121328	No
chrI	2121695	2122108	No
chrI	2122112	2122397	YES
chrI	2122669	2123013	YES
chrI	2124256	2124510	YES
chrI	2124525	2124792	YES
chrI	2125507	2125771	YES
[truncated: 30,129 more rows]

## Sheet: TRs
Chromosome	Start	Stop	5+ reads?
chrI	1070	1122	No
chrI	2476	2487	No
chrI	8188	8433	No
chrI	12740	12797	YES
chrI	14260	14353	No
chrI	14272	14368	YES
chrI	19643	19685	No
chrI	21428	21471	No
chrI	21433	21481	No
chrI	24001	24297	No
chrI	24415	24476	No
chrI	26264	26319	YES
chrI	26265	26318	YES
chrI	27270	27318	No
chrI	27660	27725	YES
chrI	28968	29020	No
chrI	30503	30548	No
chrI	36756	36823	YES
chrI	38328	38586	YES
chrI	38343	38598	YES
chrI	40558	40737	No
chrI	40580	40737	No
chrI	45450	45583	No
chrI	46835	46894	YES
chrI	48924	48979	No
chrI	51819	51846	No
chrI	52722	52798	No
chrI	53788	53932	No
chrI	53789	53932	No
chrI	54674	54744	No
chrI	55526	55604	No
chrI	60524	60592	No
chrI	65313	65379	No
chrI	66377	66457	No
chrI	73459	73524	No
chrI	80754	80804	YES
chrI	87308	87354	No
chrI	90951	91010	No
chrI	94767	94817	YES
chrI	95451	96026	No
chrI	99168	99218	No
chrI	101038	101096	No
chrI	101054	101101	No
chrI	104376	104432	No
chrI	104376	104433	No
chrI	108012	108082	YES
chrI	108063	108102	YES
chrI	112910	112982	No
chrI	112910	113063	No
chrI	114590	114665	YES
chrI	114592	114662	YES
chrI	116986	117028	No
chrI	117589	117634	No
chrI	117657	117695	No
chrI	117944	117981	No
chrI	121716	121821	No
chrI	131720	131919	YES
chrI	133075	133163	No
chrI	134648	134695	No
chrI	136268	136309	No
chrI	145086	145159	No
chrI	145922	145974	No
chrI	148609	148655	No
chrI	156599	156767	No
chrI	157841	157881	No
chrI	161279	161401	No
chrI	161433	161501	No
chrI	161517	161561	No
chrI	164604	164646	No
chrI	166392	166446	No
chrI	166562	166636	No
chrI	167158	167453	No
chrI	167221	167421	No
chrI	167221	167461	No
chrI	167527	167650	No
chrI	178138	178194	No
chrI	178939	179094	No
chrI	178939	179094	No
chrI	180947	181042	YES
chrI	180950	181057	YES
chrI	181309	181351	YES
chrI	184258	184310	No
chrI	188627	188673	No
chrI	188877	188924	No
chrI	190048	190348	No
chrI	193219	193274	No
chrI	193219	193325	No
chrI	193465	193509	No
chrI	194652	194689	No
chrI	195551	195653	No
chrI	195566	195653	No
chrI	195818	195920	No
chrI	196561	196606	No
chrI	198928	199054	YES
chrI	199366	199367	YES
chrI	199398	199409	YES
chrI	199440	199462	YES
chrI	202558	202760	No
chrI	207376	207601	No
chrI	207386	207601	No
chrI	208206	208252	No
chrI	208351	208396	No
chrI	209640	209782	No
chrI	211772	211828	No
chrI	215969	216016	No
chrI	219357	219524	No
chrI	219492	219559	No
chrI	219593	219736	No
chrI	219593	219724	No
chrI	219593	219707	No
chrI	219593	219723	No
chrI	222881	223046	No
chrI	222881	223036	No
chrI	223043	223275	No
chrI	224011	224054	No
chrI	227586	227625	No
chrI	232288	232340	No
chrI	233228	233272	No
chrI	236714	237046	No
chrI	237208	237507	No
chrI	237627	237689	No
chrI	248377	248561	No
chrI	248406	248557	No
chrI	252060	252107	No
chrI	254502	254569	No
chrI	254595	254705	No
chrI	256130	256189	No
chrI	256132	256190	No
chrI	263358	263421	No
chrI	268473	268520	No
chrI	269390	269459	No
chrI	270617	270673	No
chrI	270670	270760	No
chrI	275645	275691	No
chrI	276802	276970	No
chrI	276810	276964	No
chrI	279439	279509	No
chrI	279459	279657	No
chrI	280520	281438	No
chrI	280520	281438	No
chrI	282782	282825	No
chrI	285656	285758	No
chrI	286424	286485	No
chrI	286424	286479	No
chrI	287065	287106	No
chrI	291062	291113	No
chrI	292185	292225	No
chrI	294723	294770	No
chrI	294734	294773	No
chrI	302053	302100	No
chrI	306687	306801	No
chrI	307815	307967	No
chrI	317652	317976	No
chrI	319243	319312	No
chrI	319399	319464	No
chrI	319512	319584	No
chrI	323589	323672	No
chrI	323609	323653	No
chrI	324974	325088	No
chrI	324976	325088	No
chrI	325077	325172	No
chrI	325167	325231	No
chrI	326098	326684	No
chrI	326116	326682	No
chrI	326732	326813	No
chrI	326815	326922	No
chrI	326831	326881	No
chrI	327270	327321	No
chrI	328145	328186	No
chrI	328244	328297	No
chrI	330859	330904	No
chrI	334679	334691	No
chrI	334858	334891	No
chrI	335058	335204	No
chrI	335205	335282	No
chrI	335286	335598	No
chrI	335286	335327	No
chrI	338424	338472	No
chrI	338513	341227	YES
chrI	343148	343186	No
chrI	343464	343507	YES
chrI	343644	343684	YES
chrI	344388	344413	No
chrI	346087	346133	No
chrI	349995	350038	No
chrI	350262	350301	YES
chrI	352323	352368	No
chrI	353317	353614	No
chrI	353379	353582	No
chrI	353408	353548	No
chrI	355869	355993	No
chrI	355869	355993	No
chrI	356016	356109	No
chrI	356016	356109	No
chrI	356136	356214	No
chrI	356136	356214	No
chrI	356258	356269	No
chrI	356335	356529	No
chrI	356552	356813	No
chrI	358812	359038	No
chrI	359292	359335	No
chrI	370958	371006	No
chrI	371700	371749	No
chrI	371701	371749	No
chrI	372054	372105	No
chrI	372840	372925	No
chrI	373055	373102	No
chrI	373066	373120	No
chrI	373138	373202	No
chrI	375762	375805	No
chrI	377126	377169	No
chrI	377623	377795	No
chrI	377634	377776	No
chrI	378088	378401	YES
chrI	379876	379939	YES
chrI	384020	384061	No
chrI	385755	385788	No
chrI	387025	387081	No
chrI	387025	387096	No
chrI	387322	387375	No
chrI	388604	388647	No
chrI	389988	390035	No
chrI	391374	391453	No
chrI	391380	391482	No
chrI	392860	392901	YES
chrI	396338	396397	No
chrI	398598	398640	No
chrI	400243	400316	No
chrI	400271	400353	No
chrI	402498	402856	YES
chrI	403881	404068	YES
chrI	403882	404068	YES
chrI	404682	404735	No
chrI	404686	404747	No
chrI	411065	411116	No
chrI	411743	411778	No
chrI	413113	413181	No
chrI	414003	414049	No
chrI	417359	417462	No
chrI	422917	422996	No
chrI	434332	434374	No
chrI	437257	437373	No
chrI	445878	445915	YES
chrI	445878	445915	YES
chrI	445878	445889	YES
chrI	446332	446337	YES
chrI	449988	450039	No
chrI	450948	450997	No
chrI	455066	455125	No
chrI	464531	464571	No
chrI	466434	466478	No
chrI	467793	467839	No
chrI	467960	468011	No
chrI	468113	468205	No
chrI	469153	469202	No
chrI	475710	475799	No
chrI	480314	480358	No
chrI	483632	483674	No
chrI	484086	484156	No
chrI	488490	488528	No
chrI	488569	488608	YES
chrI	493715	493903	No
chrI	496183	496228	YES
chrI	496826	496928	No
chrI	497486	497659	No
chrI	497486	497660	No
chrI	497486	497661	No
chrI	499202	499250	No
chrI	503274	503550	No
chrI	510395	510478	No
chrI	517616	517658	YES
chrI	519039	519085	No
chrI	519784	519823	YES
chrI	520089	520154	No
chrI	520089	520154	No
chrI	522123	522202	No
chrI	523103	523168	No
chrI	523402	523879	No
chrI	528692	528830	No
chrI	529343	529389	No
chrI	529343	529389	No
chrI	544776	544912	YES
chrI	544790	544956	YES
chrI	544798	544933	YES
chrI	544838	544985	No
chrI	544923	544974	No
chrI	546868	547074	No
chrI	546868	547074	No
chrI	546868	547076	No
chrI	547951	548013	No
chrI	551291	551353	YES
chrI	554691	554693	No
chrI	556142	556181	YES
chrI	558853	558891	No
chrI	558853	558891	No
chrI	558922	558968	No
chrI	558922	558970	No
chrI	559933	560677	No
chrI	559933	560677	No
chrI	559945	560677	No
chrI	562041	562313	No
chrI	562115	562183	No
chrI	562117	562188	No
chrI	562397	562489	No
chrI	563709	564029	No
chrI	573738	573885	YES
chrI	573738	573891	YES
chrI	573738	573885	YES
chrI	577868	577899	No
chrI	577920	577967	No
chrI	579101	579157	No
chrI	579299	579402	No
chrI	579310	579403	No
chrI	580158	580196	No
chrI	580348	581565	No
chrI	583053	583093	No
chrI	583148	583218	No
chrI	583227	583339	No
chrI	583401	583414	No
chrI	583435	583441	No
chrI	583462	583470	No
chrI	586500	586856	No
chrI	586641	586696	No
chrI	586971	587026	YES
chrI	588202	588289	No
chrI	592335	592420	YES
chrI	592860	592921	No
chrI	593826	595005	YES
chrI	593826	595005	YES
chrI	594625	594801	YES
chrI	594828	595004	YES
chrI	603729	603828	YES
chrI	603729	603828	YES
chrI	603743	603828	YES
chrI	603927	604048	No
chrI	603997	604126	No
chrI	603999	604068	No
chrI	604014	604126	No
chrI	604031	604126	No
chrI	604162	604299	No
chrI	604162	604272	No
chrI	605869	606021	No
chrI	606167	606253	No
chrI	607984	608029	No
chrI	609229	609653	No
chrI	609572	611482	YES
chrI	609572	611482	YES
chrI	609578	611482	YES
chrI	612057	612176	No
chrI	612060	612198	No
chrI	612205	612578	No
chrI	612211	612646	No
chrI	612226	612708	No
chrI	612494	612722	No
chrI	612571	612655	No
chrI	615331	615379	No
chrI	623438	623487	No
chrI	623723	624196	No
chrI	623723	624196	No
chrI	625322	625347	No
chrI	625322	625331	No
chrI	625562	625599	YES
chrI	625830	625935	No
chrI	627550	627554	No
chrI	627592	627597	No
chrI	628555	628960	No
chrI	628757	629242	No
chrI	632136	632211	YES
chrI	636346	636594	YES
chrI	637353	637399	No
chrI	643077	643336	No
chrI	643160	643487	No
chrI	643329	643394	No
chrI	645994	646033	No
chrI	646820	646869	No
chrI	646822	646868	No
chrI	647601	647738	No
chrI	648422	648473	No
chrI	649186	649548	No
chrI	649823	651710	No
chrI	649825	651710	No
chrI	653364	653408	No
chrI	656834	656881	No
chrI	656991	657234	No
chrI	657338	657401	No
chrI	657790	657855	No
chrI	658132	658139	No
chrI	658183	658199	No
chrI	658183	658199	No
chrI	658183	658199	No
chrI	658241	658260	No
chrI	658241	658260	No
chrI	658241	658260	No
chrI	659165	659244	No
chrI	659387	659475	No
chrI	660661	660924	No
chrI	660884	660947	No
chrI	660958	661068	No
chrI	661065	661128	No
chrI	662549	662579	No
chrI	662779	662821	No
chrI	662779	662821	No
chrI	665441	665604	No
chrI	669652	669672	No
chrI	669652	669672	No
chrI	669652	669672	No
chrI	670106	671747	No
chrI	670106	670480	No
chrI	670106	670480	No
chrI	670494	671747	No
chrI	673332	673374	No
chrI	673706	673762	No
chrI	675232	675282	No
chrI	676307	676361	No
chrI	676308	676362	No
chrI	679008	679147	No
chrI	679008	679143	No
chrI	679008	679143	No
chrI	681213	681269	No
chrI	685489	685536	No
chrI	686836	686959	No
chrI	686837	686958	No
chrI	686907	686960	No
chrI	687005	687644	No
chrI	687005	687644	No
chrI	687749	687940	No
chrI	687749	687940	No
chrI	687959	687964	No
chrI	688673	688689	No
chrI	688708	688790	No
chrI	689967	690172	No
chrI	689973	690081	No
chrI	690053	690102	No
chrI	690095	690171	No
chrI	691559	691603	No
chrI	692405	692579	No
chrI	692406	692577	No
chrI	692406	692577	No
chrI	692414	692596	No
chrI	692731	693028	No
chrI	692731	692831	No
chrI	692844	693246	No
chrI	692951	693094	No
chrI	692996	693200	No
chrI	693105	693361	No
chrI	693105	693361	No
chrI	693383	693472	No
chrI	693861	693862	No
chrI	693861	693862	No
chrI	693920	694084	No
chrI	693920	694084	No
chrI	693920	694034	No
chrI	694153	694254	No
chrI	694153	694254	No
chrI	694153	694254	No
chrI	694311	694542	No
chrI	694311	694427	No
chrI	694311	694547	No
chrI	694443	694542	No
chrI	694470	694547	No
chrI	697016	697751	No
chrI	697794	697847	No
chrI	697903	697937	No
chrI	698393	698450	No
chrI	698411	698450	No
chrI	698495	698558	No
chrI	698495	698792	No
chrI	698599	698676	No
chrI	698853	698872	No
chrI	698918	699175	No
chrI	698918	698937	No
chrI	698918	698948	No
chrI	698982	699059	No
chrI	699236	699540	No
chrI	699254	699441	No
chrI	699255	699310	No
chrI	699618	699911	No
chrI	699636	699804	No
chrI	699637	699804	No
chrI	699637	699692	No
chrI	704083	704379	YES
chrI	705110	705157	No
chrI	706559	706602	YES
chrI	708321	708352	YES
chrI	708349	708352	YES
chrI	711521	711525	No
chrI	711680	711724	YES
chrI	712211	712876	YES
chrI	712424	712517	YES
chrI	712785	712867	No
chrI	715051	715091	YES
chrI	715684	715725	YES
chrI	716628	716683	YES
chrI	716635	716694	YES
chrI	718830	719310	YES
chrI	723502	723575	No
chrI	723511	723575	No
chrI	723520	723575	No
chrI	723552	723575	No
chrI	723668	723722	No
chrI	723668	723722	No
chrI	723668	723722	No
chrI	723753	723805	No
chrI	723753	724003	No
chrI	723753	723862	No
chrI	723788	723856	No
chrI	723873	724003	No
chrI	723913	723997	No
chrI	723920	724003	No
chrI	723963	724003	No
chrI	724056	724088	No
chrI	724056	724101	No
chrI	724056	724080	No
chrI	724056	724068	No
chrI	724056	724167	No
chrI	724073	724119	No
chrI	724092	724227	No
chrI	724344	724365	No
chrI	724785	724980	No
chrI	725477	725679	No
chrI	725542	725690	No
chrI	728596	728671	No
chrI	729771	729962	No
chrI	730271	730310	YES
chrI	740842	740880	No
chrI	746496	746553	No
chrI	747821	748131	No
chrI	748683	748942	No
chrI	757834	758177	No
chrI	759092	759573	No
chrI	759092	759573	No
chrI	759445	759574	No
chrI	761315	761366	No
chrI	761380	761597	No
chrI	761384	761514	No
chrI	761384	761514	No
chrI	761385	761495	No
chrI	762322	762388	No
chrI	762424	762857	No
chrI	762514	762567	No
chrI	762541	762579	No
chrI	762556	762612	No
chrI	762561	763184	No
chrI	762733	763208	No
chrI	763969	763973	No
chrI	764005	764015	YES
chrI	764035	764215	YES
chrI	764035	764215	YES
chrI	764247	764359	No
chrI	764247	764359	No
chrI	764388	765055	No
chrI	764388	765116	No
chrI	765343	765380	No
chrI	766875	767553	No
chrI	766876	767553	No
chrI	767760	768135	No
chrI	767761	768135	No
chrI	767779	767919	No
chrI	769219	770318	No
chrI	771191	771248	No
chrI	774050	774113	No
chrI	774351	774500	No
chrI	774363	774488	No
chrI	774401	774503	No
chrI	775325	775427	YES
chrI	777009	777054	No
chrI	777226	777324	No
chrI	777909	778044	No
chrI	777917	778035	No
chrI	778048	778410	No
chrI	780708	781081	YES
chrI	782895	782961	No
chrI	788528	788584	YES
chrI	794747	794987	No
chrI	795453	795502	No
chrI	796353	796484	No
chrI	802484	802582	No
chrI	806301	806358	No
chrI	808420	808517	No
chrI	808671	808791	No
chrI	810321	810434	No
chrI	810321	810448	No
chrI	817438	817694	No
chrI	817474	817678	No
chrI	817592	817722	No
chrI	817657	817737	No
chrI	818663	819240	YES
chrI	819201	819278	YES
chrI	820566	820623	No
chrI	822442	822490	No
chrI	823794	824553	YES
chrI	823805	824553	YES
chrI	826832	826844	No
chrI	826907	826964	YES
chrI	826993	827026	YES
chrI	827055	827113	No
chrI	827178	827208	No
chrI	827273	827330	No
chrI	827356	827358	No
chrI	827515	827569	No
chrI	828981	829344	No
chrI	833400	834481	YES
chrI	835811	835915	No
chrI	837811	837843	YES
chrI	838752	838820	YES
chrI	838752	838798	YES
chrI	843178	843627	YES
chrI	844606	845010	No
chrI	845172	845209	No
chrI	845218	845302	No
chrI	848647	849117	No
chrI	848652	849128	No
chrI	850770	851357	No
chrI	850791	851357	No
chrI	850875	851379	No
chrI	851037	851576	No
chrI	851305	851379	No
chrI	851400	851574	No
chrI	851419	851558	No
chrI	854931	854982	No
chrI	855129	855297	No
chrI	857396	857545	No
chrI	857584	857590	No
chrI	857749	857796	No
chrI	858898	858955	No
chrI	858939	859005	No
chrI	858940	859006	No
chrI	861059	861113	No
chrI	861163	861220	No
chrI	862023	862095	No
chrI	864907	864987	YES
chrI	865161	865671	YES
chrI	865172	865260	YES
chrI	866017	866221	No
chrI	866044	866259	No
chrI	866082	866274	No
chrI	866098	866183	No
chrI	866312	866418	No
chrI	867047	867129	No
chrI	868126	868172	No
chrI	870785	870851	No
chrI	871173	871287	No
chrI	872270	872271	No
chrI	872303	872320	No
chrI	872582	872676	YES
chrI	874345	874382	No
chrI	876671	877158	YES
chrI	876671	877158	YES
chrI	876672	877158	YES
chrI	877226	877379	YES
chrI	877425	877509	YES
chrI	878137	878187	No
chrI	878741	878823	No
chrI	879113	879174	No
chrI	879279	879339	No
chrI	883706	884130	YES
chrI	885186	885240	No
chrI	886883	887524	No
chrI	887077	887233	No
chrI	887495	887566	No
chrI	891421	891448	No
chrI	891560	891591	No
chrI	892104	892140	No
chrI	892507	892553	YES
chrI	892755	894422	No
chrI	895232	895241	No
chrI	896515	896590	No
chrI	896971	896992	No
chrI	897432	897540	No
chrI	897516	898165	No
chrI	897662	897957	No
chrI	897703	898005	No
chrI	897789	897899	No
chrI	898385	898941	No
chrI	898414	899929	No
chrI	898414	898941	No
chrI	898904	899017	No
chrI	899037	899097	No
chrI	899081	899129	No
chrI	899123	899329	No
chrI	899160	899205	No
chrI	899160	899395	No
chrI	899233	899929	No
chrI	899235	899396	No
chrI	899259	899666	No
chrI	899265	899514	No
chrI	899265	899677	No
chrI	899321	899546	No
chrI	899404	899624	No
chrI	899723	899929	No
chrI	899726	899794	No
chrI	899821	899929	No
chrI	899828	899929	No
chrI	899964	900292	No
chrI	899964	899997	No
chrI	899964	900292	No
chrI	899964	900029	No
chrI	899964	900028	No
chrI	899964	900261	No
chrI	899964	900006	No
chrI	899981	900223	No
chrI	900024	900200	No
chrI	900046	900292	No
chrI	900111	900157	No
chrI	900184	900292	No
chrI	900327	900360	No
chrI	900327	900513	No
chrI	900327	900390	No
chrI	900327	900392	No
chrI	900327	900459	No
chrI	900327	900369	No
chrI	900538	900599	No
chrI	900829	900876	No
chrI	900986	901053	No
chrI	902274	902411	No
chrI	906135	906147	No
chrI	906192	906221	No
chrI	906246	906359	No
chrI	906257	906297	No
chrI	906424	906606	No
chrI	906560	906633	No
chrI	906730	906820	No
chrI	906822	906869	No
chrI	906840	906869	No
chrI	906898	906971	YES
chrI	906898	906902	No
chrI	906898	906925	No
chrI	912953	913055	No
chrI	913082	913459	No
chrI	913308	913364	No
chrI	913331	913566	No
chrI	913431	913749	No
chrI	913536	913599	No
chrI	913670	913734	No
chrI	916677	917204	No
chrI	916680	916746	No
chrI	916798	916846	No
chrI	917041	917095	No
chrI	917946	918185	No
chrI	917953	918138	No
chrI	919375	919604	No
chrI	919375	919620	No
chrI	919383	919635	No
chrI	921017	921087	No
chrI	922077	922199	No
chrI	922220	922275	No
chrI	922297	922372	No
chrI	922394	922404	No
chrI	923262	925194	No
chrI	923264	925194	No
chrI	923266	925204	No
chrI	928052	928092	No
chrI	928696	929181	No
chrI	933482	934966	No
chrI	934970	935028	No
chrI	938733	938773	No
chrI	943081	943123	No
chrI	943401	943498	No
chrI	944427	945088	No
chrI	944463	945176	No
chrI	944470	945055	No
chrI	945098	945168	No
chrI	952317	952319	YES
chrI	952820	952860	YES
chrI	953770	954110	YES
chrI	953882	954110	YES
chrI	953893	954162	YES
chrI	954053	954193	YES
chrI	955160	955191	No
chrI	955978	956327	YES
chrI	955980	956712	YES
chrI	956167	956242	YES
chrI	956348	956490	YES
chrI	956413	956737	YES
chrI	956750	956968	YES
chrI	956836	956960	YES
chrI	957778	958413	No
chrI	957862	957979	No
chrI	957999	958141	No
chrI	958000	958309	No
chrI	958069	958415	No
chrI	958279	958423	No
chrI	958323	958372	No
chrI	958536	958606	No
chrI	958915	959018	No
chrI	960681	960732	No
chrI	961874	962579	No
chrI	962530	962582	No
chrI	963369	963614	No
chrI	970492	971039	No
chrI	973641	973701	No
chrI	973923	974254	No
chrI	974791	974864	No
chrI	976710	977626	No
chrI	976710	977626	No
chrI	980852	981495	No
chrI	980889	980940	No
chrI	982219	982297	No
chrI	982219	982378	No
chrI	982244	982365	No
chrI	982245	982563	No
chrI	982262	982543	No
chrI	982303	982544	No
chrI	982408	982544	No
chrI	983550	983763	No
chrI	983643	983723	No
chrI	983644	983704	No
chrI	984027	984254	No
chrI	984027	984252	No
chrI	984099	984155	No
chrI	986480	986535	No
chrI	993510	993963	No
chrI	993512	993597	No
chrI	994580	994722	No
chrI	998717	998781	No
chrI	1004414	1004459	No
chrI	1008796	1009381	No
chrI	1008796	1009191	No
chrI	1009016	1009380	No
chrI	1009211	1009381	No
chrI	1009212	1009402	No
chrI	1012451	1012521	No
chrI	1012461	1012529	No
chrI	1012568	1013519	No
chrI	1023276	1023323	No
chrI	1023276	1023329	No
chrI	1023804	1023843	YES
chrI	1026629	1026722	YES
chrI	1026670	1028691	YES
chrI	1026670	1028691	YES
chrI	1026787	1026889	No
chrI	1026918	1026961	No
chrI	1027100	1027141	No
chrI	1027100	1027141	No
chrI	1027280	1027322	No
chrI	1028005	1028043	No
chrI	1028223	1028311	No
chrI	1028417	1028522	No
chrI	1028551	1028594	No
chrI	1028593	1029151	No
chrI	1028633	1028862	No
chrI	1028886	1028943	No
chrI	1028948	1029225	No
chrI	1028951	1029223	No
chrI	1028954	1029277	No
chrI	1028963	1029277	No
chrI	1028973	1029172	No
chrI	1035726	1035748	YES
chrI	1035740	1035748	YES
chrI	1036018	1036039	No
chrI	1036018	1036039	No
chrI	1036018	1036039	No
chrI	1036018	1036039	No
chrI	1036018	1036039	No
chrI	1036452	1036457	YES
chrI	1038120	1038160	No
chrI	1038715	1038759	No
chrI	1039798	1039836	YES
chrI	1040994	1041044	YES
chrI	1044481	1044534	No
chrI	1044857	1044905	No
chrI	1045012	1045086	No
chrI	1046643	1046652	No
chrI	1046683	1046711	No
chrI	1046935	1047096	No
chrI	1046935	1047102	No
chrI	1047293	1047430	No
chrI	1047315	1047434	No
chrI	1047478	1047509	No
chrI	1047541	1047550	No
chrI	1048713	1048762	YES
chrI	1054911	1055110	No
chrI	1054911	1055167	No
chrI	1055175	1055221	No
chrI	1057150	1057253	No
chrI	1057170	1057262	No
chrI	1057370	1057447	No
chrI	1057370	1057447	No
chrI	1057370	1057421	No
chrI	1060894	1061651	YES
chrI	1060901	1060962	No
chrI	1061267	1061729	YES
chrI	1061273	1061727	YES
chrI	1061415	1061729	YES
chrI	1062152	1062229	YES
chrI	1065815	1065859	No
chrI	1067543	1067586	No
chrI	1070007	1070011	No
chrI	1073339	1073406	No
chrI	1073346	1073389	No
chrI	1074470	1074518	YES
chrI	1077665	1077712	No
chrI	1078055	1078096	No
chrI	1080883	1080965	No
chrI	1080963	1081625	No
chrI	1080967	1081623	No
chrI	1080967	1081625	No
chrI	1081382	1081563	No
chrI	1082454	1082492	No
chrI	1083182	1083607	No
chrI	1083182	1083607	No
chrI	1084841	1084922	No
chrI	1084878	1084935	No
chrI	1084955	1085519	No
chrI	1087719	1088047	No
chrI	1087741	1087822	No
chrI	1087833	1088334	No
chrI	1088802	1088861	No
chrI	1090644	1090776	No
chrI	1090663	1090776	No
chrI	1090678	1090792	No
chrI	1091706	1092246	YES
chrI	1092298	1092357	No
chrI	1093299	1093380	No
chrI	1093313	1094243	YES
chrI	1093362	1093422	No
chrI	1093468	1094247	YES
chrI	1093571	1093699	YES
chrI	1093614	1094247	YES
chrI	1093614	1094247	YES
chrI	1096725	1097177	No
chrI	1096725	1097177	No
chrI	1096726	1097156	No
chrI	1097721	1098285	No
chrI	1098342	1098402	No
chrI	1098782	1098835	No
chrI	1099808	1099852	No
chrI	1101354	1101399	No
chrI	1102005	1102050	No
chrI	1106916	1106957	No
chrI	1107428	1107433	No
chrI	1108040	1108240	No
chrI	1108117	1108240	No
chrI	1108335	1108644	No
chrI	1108335	1108431	No
chrI	1108376	1108547	No
chrI	1108452	1108687	No
chrI	1108478	1108625	No
chrI	1108662	1108689	No
chrI	1109173	1109264	No
chrI	1109611	1109654	No
chrI	1110188	1110498	No
chrI	1110188	1110497	No
chrI	1110196	1110497	No
chrI	1113333	1113377	No
chrI	1114075	1114133	No
chrI	1114075	1114132	No
chrI	1122170	1124189	No
chrI	1122170	1124189	No
chrI	1124334	1124477	No
chrI	1124334	1124477	No
chrI	1124568	1124869	No
chrI	1125577	1125629	No
chrI	1125815	1125870	No
chrI	1127558	1127613	No
chrI	1130298	1130311	No
chrI	1130352	1130354	No
chrI	1130398	1130516	No
chrI	1130554	1130625	No
chrI	1134037	1135240	No
chrI	1134079	1135242	No
chrI	1134080	1135202	No
chrI	1134226	1135242	No
chrI	1136286	1136290	No
chrI	1143110	1143178	No
chrI	1145913	1145993	No
chrI	1150948	1150990	No
chrI	1150979	1151035	No
chrI	1151131	1151175	No
chrI	1152307	1152362	No
chrI	1152309	1152350	No
chrI	1152315	1152362	No
chrI	1153027	1153110	No
chrI	1153138	1153627	YES
chrI	1153273	1153323	No
chrI	1154950	1154977	YES
chrI	1154956	1154977	YES
chrI	1160156	1160266	No
chrI	1161350	1161377	No
chrI	1166810	1166971	No
chrI	1166845	1166999	No
chrI	1166988	1167121	No
chrI	1167067	1167131	No
chrI	1169149	1169249	No
chrI	1169414	1169538	No
chrI	1170429	1170470	No
chrI	1170444	1170527	No
chrI	1176758	1176807	YES
chrI	1186679	1187195	YES
chrI	1186679	1187193	YES
chrI	1186679	1187193	YES
chrI	1190147	1190208	YES
chrI	1190370	1190483	No
chrI	1190837	1190885	No
chrI	1191008	1191119	No
chrI	1191140	1191203	No
chrI	1191282	1191325	YES
chrI	1191289	1191391	YES
chrI	1191346	1191524	YES
chrI	1191400	1191526	YES
chrI	1191577	1191646	No
chrI	1192063	1192106	No
chrI	1192517	1192590	No
chrI	1192564	1192605	No
chrI	1192656	1192742	No
chrI	1192897	1192925	No
chrI	1193781	1193866	No
chrI	1195151	1195286	No
chrI	1195313	1195465	No
chrI	1195441	1195579	No
chrI	1196113	1196190	No
chrI	1196113	1196201	No
chrI	1196293	1196330	No
chrI	1196464	1196521	No
chrI	1196534	1196795	No
chrI	1197022	1197070	No
chrI	1197269	1197335	No
chrI	1197275	1197365	No
chrI	1197280	1197365	No
chrI	1197392	1197495	No
chrI	1197392	1197488	No
chrI	1197681	1197738	No
chrI	1200883	1200929	No
chrI	1201099	1201154	No
chrI	1203387	1203437	No
chrI	1208133	1208382	No
chrI	1208134	1208382	No
chrI	1208282	1208376	No
chrI	1208313	1208376	No
chrI	1209177	1209307	No
chrI	1209212	1209279	No
chrI	1209267	1210715	YES
chrI	1209267	1210715	YES
chrI	1210414	1210717	No
chrI	1210485	1210757	No
chrI	1210533	1210594	No
chrI	1210543	1210603	No
chrI	1211753	1212433	YES
chrI	1211753	1212436	YES
chrI	1211766	1212436	YES
chrI	1212942	1213434	No
chrI	1213366	1213441	No
chrI	1213504	1213610	No
chrI	1213504	1213626	No
chrI	1213998	1214036	No
chrI	1214084	1214144	No
chrI	1214215	1214278	No
chrI	1223003	1223085	No
chrI	1223142	1223445	No
chrI	1223143	1223899	YES
chrI	1223228	1223322	No
chrI	1223360	1223472	No
chrI	1223523	1223825	No
chrI	1223756	1223941	YES
chrI	1228223	1228287	No
chrI	1238232	1238330	No
chrI	1238243	1238330	No
chrI	1238273	1238457	No
chrI	1238287	1238381	No
chrI	1238357	1238457	No
chrI	1238380	1238442	No
chrI	1238405	1238457	No
chrI	1238405	1238457	No
chrI	1238498	1238667	No
chrI	1238498	1238517	No
chrI	1238498	1238590	No
chrI	1238587	1238647	No
chrI	1238612	1238667	No
chrI	1238666	1238667	No
chrI	1238705	1238724	No
chrI	1238705	1238732	No
chrI	1239228	1239275	No
chrI	1241463	1241723	No
chrI	1241758	1241795	No
chrI	1241764	1241795	No
chrI	1241842	1241895	No
chrI	1241842	1241895	No
chrI	1241979	1242098	No
chrI	1246594	1246595	No
chrI	1246654	1246887	YES
chrI	1246654	1247308	YES
chrI	1246654	1247308	YES
chrI	1246698	1246887	YES
chrI	1246738	1246791	YES
chrI	1246765	1247308	YES
chrI	1246787	1247293	YES
chrI	1250262	1250679	YES
chrI	1250637	1250706	YES
chrI	1267249	1267321	YES
chrI	1273266	1273541	No
chrI	1273285	1273540	No
chrI	1274552	1274605	No
chrI	1276772	1276818	No
chrI	1276819	1276895	No
chrI	1279299	1279346	No
chrI	1283407	1283470	No
chrI	1284304	1284378	No
chrI	1284361	1284565	No
chrI	1284380	1284553	No
chrI	1284408	1284557	No
chrI	1285657	1287216	No
chrI	1290103	1290169	No
chrI	1290870	1290945	No
chrI	1290893	1291236	No
chrI	1291032	1291227	No
chrI	1291032	1291182	No
chrI	1293629	1293871	No
chrI	1293715	1293770	No
chrI	1293730	1293971	No
chrI	1293937	1293993	No
chrI	1295812	1295865	No
chrI	1296526	1296573	YES
chrI	1297525	1298145	YES
chrI	1297525	1298145	YES
chrI	1297525	1298148	YES
chrI	1298332	1298376	YES
chrI	1299704	1299816	No
chrI	1299706	1299905	No
chrI	1302175	1302233	No
chrI	1310052	1310094	No
chrI	1316906	1316945	YES
chrI	1317463	1319302	No
chrI	1318166	1318230	No
chrI	1318811	1318875	No
chrI	1322585	1322698	YES
chrI	1323109	1323189	No
chrI	1326685	1326887	No
chrI	1326698	1326743	No
chrI	1326962	1327369	No
chrI	1327001	1327183	No
chrI	1327286	1327333	No
chrI	1329119	1329196	No
chrI	1331322	1332132	No
chrI	1331386	1332132	No
chrI	1334388	1334432	No
chrI	1334501	1334948	No
chrI	1334552	1334605	No
chrI	1334814	1334858	No
chrI	1334839	1335038	No
chrI	1335016	1335060	No
chrI	1335041	1335255	No
chrI	1341773	1342154	No
chrI	1343760	1343845	No
chrI	1343769	1343844	No
chrI	1343923	1343970	No
chrI	1346124	1346163	No
chrI	1351206	1351495	YES
chrI	1351438	1351960	YES
chrI	1351438	1351949	YES
chrI	1352151	1352259	No
chrI	1352229	1352276	No
chrI	1353125	1353128	YES
chrI	1354490	1354520	No
chrI	1354665	1354666	No
chrI	1354665	1354666	No
chrI	1354665	1354666	No
chrI	1354810	1354892	No
chrI	1354810	1354892	No
chrI	1354810	1354892	No
chrI	1354810	1354892	No
chrI	1354917	1354924	No
chrI	1354917	1354932	No
chrI	1354917	1354933	No
chrI	1354917	1354932	No
chrI	1354958	1354997	No
chrI	1357830	1357895	No
chrI	1357830	1357857	No
chrI	1357830	1357896	No
chrI	1357830	1357912	No
chrI	1357830	1357883	No
chrI	1360400	1360465	No
chrI	1361014	1361086	No
chrI	1362694	1362883	No
chrI	1363114	1363627	YES
chrI	1371465	1373685	YES
chrI	1371507	1371560	No
chrI	1371642	1371683	No
chrI	1371765	1371806	No
chrI	1372177	1372372	No
chrI	1373325	1373379	No
chrI	1374120	1374802	YES
chrI	1374120	1374802	YES
chrI	1374120	1374802	YES
chrI	1374185	1374260	No
chrI	1374198	1374368	YES
chrI	1378647	1378765	YES
chrI	1383739	1384707	YES
chrI	1383739	1384707	YES
chrI	1384278	1384571	YES
chrI	1384933	1384999	YES
chrI	1385184	1385230	No
chrI	1385755	1386162	No
chrI	1385755	1386162	No
chrI	1390284	1390446	No
chrI	1390289	1390334	No
chrI	1391325	1391568	No
chrI	1391325	1391545	No
chrI	1391389	1391545	No
chrI	1391970	1392539	No
chrI	1392089	1392146	No
chrI	1392220	1392280	No
chrI	1395041	1395043	No
chrI	1395147	1395150	No
chrI	1396403	1396459	No
chrI	1396631	1396678	No
chrI	1397224	1397270	No
chrI	1398038	1398040	No
chrI	1398173	1398174	No
chrI	1398223	1398242	No
chrI	1398371	1398427	No
chrI	1398372	1398427	No
chrI	1398493	1398509	No
chrI	1398493	1398509	No
chrI	1398493	1398510	No
chrI	1398606	1398687	No
chrI	1403003	1403182	YES
chrI	1403445	1403507	YES
chrI	1405509	1405588	No
chrI	1406393	1406594	No
chrI	1406430	1406475	No
chrI	1408681	1408974	No
chrI	1408681	1408974	No
chrI	1408950	1409017	No
chrI	1408968	1409025	No
chrI	1409044	1409400	No
chrI	1411619	1412571	No
chrI	1412117	1412168	No
chrI	1412227	1412268	No
chrI	1412248	1412446	No
chrI	1412337	1412568	No
chrI	1412427	1412468	No
chrI	1412839	1412886	YES
chrI	1413160	1413832	No
chrI	1413270	1413832	No
chrI	1413378	1413444	No
chrI	1413641	1413706	No
chrI	1414289	1414347	No
chrI	1414472	1414522	YES
chrI	1414568	1414924	No
chrI	1414569	1414924	No
chrI	1415560	1415603	YES
chrI	1418912	1418950	YES
chrI	1421830	1421897	No
chrI	1421941	1421991	No
chrI	1427917	1428013	YES
chrI	1429248	1429312	No
chrI	1429344	1429543	No
chrI	1429608	1430330	No
chrI	1429608	1430330	No
chrI	1430421	1430475	No
chrI	1430500	1431003	No
chrI	1430500	1431003	No
chrI	1430661	1430715	No
chrI	1430784	1430838	No
chrI	1430906	1430960	No
chrI	1435815	1435914	YES
chrI	1436191	1436239	YES
chrI	1436814	1437066	No
chrI	1436819	1437097	No
chrI	1436826	1437065	No
chrI	1437051	1437099	No
chrI	1437051	1437107	No
chrI	1441255	1441305	YES
chrI	1442681	1442757	No
chrI	1442814	1442901	No
chrI	1442854	1442912	No
chrI	1443157	1443222	No
chrI	1443319	1443371	No
chrI	1444184	1444230	No
chrI	1448274	1449224	No
chrI	1448275	1449224	No
chrI	1450370	1450888	No
chrI	1450467	1450523	No
chrI	1450704	1450768	No
chrI	1450835	1450888	No
chrI	1452272	1452549	No
chrI	1452275	1452316	No
chrI	1452387	1452446	No
chrI	1453384	1454056	No
chrI	1454057	1454109	No
chrI	1459901	1459965	No
chrI	1461357	1461447	No
chrI	1462137	1463234	No
chrI	1462137	1463251	No
chrI	1462179	1462234	No
chrI	1465898	1465903	No
chrI	1466973	1467023	No
chrI	1467425	1467994	No
chrI	1469802	1469845	No
chrI	1471431	1471477	No
chrI	1474846	1475124	No
chrI	1475504	1475545	No
chrI	1480002	1480044	No
chrI	1486809	1487158	No
chrI	1486860	1487195	YES
chrI	1487475	1487715	No
chrI	1488125	1488348	No
chrI	1488125	1488348	No
chrI	1488862	1488930	No
chrI	1489390	1489526	No
chrI	1489946	1490252	YES
chrI	1493037	1493132	No
chrI	1493344	1493393	YES
chrI	1495295	1495384	No
chrI	1495531	1495598	No
chrI	1498363	1498414	YES
chrI	1499712	1500627	YES
chrI	1499715	1499806	YES
chrI	1499976	1500267	YES
chrI	1500077	1500332	YES
chrI	1500292	1500627	YES
chrI	1500327	1500417	YES
chrI	1503652	1504310	YES
chrI	1503652	1504311	YES
chrI	1503652	1504311	YES
chrI	1506203	1506270	No
chrI	1512709	1512773	YES
chrI	1515411	1515478	YES
chrI	1515411	1515477	YES
chrI	1518335	1518338	No
chrI	1518522	1518604	YES
chrI	1518726	1518802	YES
chrI	1518726	1518802	YES
chrI	1518726	1518802	YES
chrI	1518777	1518802	YES
chrI	1518785	1518802	YES
chrI	1518882	1518890	No
chrI	1518882	1518890	No
chrI	1518882	1518890	No
chrI	1518882	1518890	No
chrI	1518971	1518972	YES
chrI	1518971	1518972	YES
chrI	1523685	1523732	No
chrI	1523685	1523732	No
chrI	1524753	1524764	No
chrI	1525513	1525745	No
chrI	1525599	1525724	No
chrI	1529501	1529751	No
chrI	1530768	1530812	YES
chrI	1532403	1532425	No
chrI	1532403	1532425	No
chrI	1532411	1532425	No
chrI	1532495	1532645	No
chrI	1532495	1532645	No
chrI	1532495	1532645	No
chrI	1532715	1532966	No
chrI	1532715	1532966	No
chrI	1532715	1532966	No
chrI	1532715	1532987	No
chrI	1532715	1532952	No
chrI	1532722	1532995	No
chrI	1540183	1540242	No
chrI	1540275	1540327	No
chrI	1540312	1540327	No
chrI	1540353	1540375	No
chrI	1540353	1540375	No
chrI	1540806	1540877	YES
chrI	1546349	1546362	No
chrI	1546410	1546455	No
chrI	1548973	1549045	YES
chrI	1550005	1550080	No
chrI	1550800	1551348	No
chrI	1550801	1551334	No
chrI	1550819	1551803	YES
chrI	1550896	1551790	YES
chrI	1550972	1551802	YES
chrI	1551594	1551803	YES
chrI	1551677	1551782	No
chrI	1556891	1556955	No
chrI	1563447	1563882	YES
chrI	1564849	1565147	YES
chrI	1565125	1565177	YES
chrI	1567695	1567750	No
chrI	1567806	1567912	YES
chrI	1567814	1567913	YES
chrI	1573843	1573850	No
chrI	1574880	1574919	YES
chrI	1574880	1574919	YES
chrI	1574880	1574919	YES
chrI	1574880	1574919	YES
chrI	1574880	1574919	YES
chrI	1575165	1575168	YES
chrI	1575165	1575168	YES
chrI	1580103	1580155	No
chrI	1582679	1582873	No
chrI	1582806	1582894	No
chrI	1584507	1584829	No
chrI	1584992	1585070	No
chrI	1586435	1586479	No
chrI	1587160	1587201	No
chrI	1587543	1587583	No
chrI	1589830	1589953	No
chrI	1591083	1591125	No
chrI	1591083	1591125	No
chrI	1591228	1591352	No
chrI	1591612	1591659	No
chrI	1591659	1591734	No
chrI	1593585	1594333	YES
chrI	1596810	1596959	No
chrI	1596814	1597044	No
chrI	1603065	1603106	No
chrI	1603497	1603513	No
chrI	1603882	1603885	YES
chrI	1605937	1606169	No
chrI	1606255	1606347	No
chrI	1606787	1606855	YES
chrI	1606817	1606857	YES
chrI	1606955	1606978	No
chrI	1607290	1607377	No
chrI	1607498	1607513	No
chrI	1608160	1608310	No
chrI	1608277	1608515	No
chrI	1608338	1608383	No
chrI	1608440	1608484	No
chrI	1608549	1608587	No
chrI	1608605	1608643	No
chrI	1609022	1609546	No
chrI	1609036	1609075	No
chrI	1609128	1609167	No
chrI	1609148	1609511	No
chrI	1609156	1609200	No
chrI	1609257	1609406	No
chrI	1611069	1611361	No
chrI	1611426	1611470	No
chrI	1612018	1612077	No
chrI	1616393	1616492	No
chrI	1616396	1616492	No
chrI	1616451	1616492	No
chrI	1618056	1618104	No
chrI	1618191	1618415	No
chrI	1618235	1618298	No
chrI	1618264	1618458	YES
chrI	1618296	1618458	YES
chrI	1618466	1619586	YES
chrI	1618492	1618544	No
chrI	1618609	1618957	YES
chrI	1618766	1619465	YES
chrI	1618877	1619533	YES
chrI	1618888	1618999	No
chrI	1619127	1619566	YES
chrI	1619174	1619515	YES
chrI	1619479	1619587	YES
chrI	1620598	1620609	No
chrI	1621795	1621858	No
chrI	1621828	1622273	No
chrI	1621828	1622271	No
chrI	1621832	1622278	No
chrI	1624524	1624584	No
chrI	1624648	1624696	No
chrI	1625631	1625688	No
chrI	1625631	1625689	No
chrI	1625999	1626044	No
chrI	1626263	1626329	No
chrI	1627885	1628238	YES
chrI	1628892	1628952	No
chrI	1630394	1630460	YES
chrI	1633569	1633714	No
chrI	1633587	1633726	No
chrI	1635608	1635797	No
chrI	1635674	1635908	No
chrI	1635674	1635908	No
chrI	1635717	1635856	No
chrI	1635748	1635886	No
chrI	1635788	1635915	No
chrI	1637021	1637105	No
chrI	1637072	1637160	No
chrI	1637482	1637580	No
chrI	1637643	1637688	No
chrI	1637643	1637696	No
chrI	1637648	1637841	No
chrI	1637747	1638497	No
chrI	1637753	1637797	No
chrI	1637999	1638045	No
chrI	1638231	1638274	No
chrI	1638356	1638410	No
chrI	1639538	1639612	No
chrI	1640496	1640639	YES
chrI	1640502	1640639	YES
chrI	1640909	1641011	No
chrI	1643047	1643492	No
chrI	1643048	1643579	No
chrI	1643105	1643318	No
chrI	1643134	1643579	No
chrI	1643446	1643522	No
chrI	1643756	1643806	No
chrI	1652302	1652693	No
chrI	1653206	1653382	No
chrI	1655781	1655834	YES
chrI	1657025	1657450	No
chrI	1658338	1660438	No
chrI	1661072	1661128	No
chrI	1661251	1663107	No
chrI	1661261	1663158	No
chrI	1661291	1663169	No
chrI	1663550	1663737	No
chrI	1663557	1663749	No
chrI	1663630	1663750	No
chrI	1663796	1663875	No
chrI	1664773	1664979	No
chrI	1664773	1664979	No
chrI	1665775	1665873	No
chrI	1667804	1668120	No
chrI	1667813	1668121	No
chrI	1667841	1668120	No
chrI	1671326	1671433	No
chrI	1672384	1672429	No
chrI	1677248	1677470	No
chrI	1677254	1677458	No
chrI	1677254	1677519	No
chrI	1680063	1680166	No
chrI	1680063	1680177	No
chrI	1680953	1681001	No
chrI	1682206	1682742	No
chrI	1682352	1682786	No
chrI	1682352	1682748	No
chrI	1682380	1682692	No
chrI	1682396	1682598	No
chrI	1683854	1683938	No
chrI	1686892	1686931	No
chrI	1688289	1688295	No
chrI	1693719	1694591	YES
chrI	1693728	1694598	YES
chrI	1693770	1694591	YES
chrI	1694091	1694424	YES
chrI	1694183	1694544	YES
chrI	1694473	1694591	YES
chrI	1694490	1694557	YES
chrI	1696871	1696929	No
chrI	1701283	1701325	No
chrI	1704517	1705521	No
chrI	1705304	1705507	No
chrI	1706047	1706215	YES
chrI	1706069	1706240	YES
chrI	1706126	1706173	YES
chrI	1707113	1707248	No
chrI	1707123	1707236	No
chrI	1707916	1707953	YES
chrI	1708024	1708028	YES
chrI	1708027	1708028	YES
chrI	1708073	1708138	YES
chrI	1708073	1708138	YES
chrI	1708181	1708225	YES
chrI	1708181	1708229	YES
chrI	1709911	1709966	No
chrI	1710151	1710297	No
chrI	1710170	1710657	No
chrI	1710171	1710314	No
chrI	1710172	1710657	No
chrI	1710185	1710224	No
chrI	1710240	1710353	No
chrI	1710291	1710435	No
chrI	1710339	1710386	No
chrI	1710361	1710465	No
chrI	1710479	1710592	No
chrI	1710578	1710627	No
chrI	1711394	1711465	No
chrI	1712287	1712341	No
chrI	1712952	1713010	No
chrI	1713106	1713150	No
chrI	1713220	1713365	No
chrI	1713333	1713385	No
chrI	1713439	1713482	No
chrI	1713899	1713933	No
chrI	1714619	1714787	No
chrI	1714683	1714740	No
chrI	1715693	1715747	No
chrI	1715768	1715850	No
chrI	1715773	1715905	No
chrI	1716388	1716428	No
chrI	1716400	1716445	No
chrI	1718148	1718219	No
chrI	1718148	1718197	No
chrI	1719383	1719423	No
chrI	1729385	1729429	YES
chrI	1736876	1736926	YES
chrI	1737559	1737603	YES
chrI	1740636	1740689	No
chrI	1741349	1741654	No
chrI	1741385	1741713	No
chrI	1741532	1741572	No
chrI	1741652	1741691	No
chrI	1744845	1744885	No
chrI	1746304	1746544	No
chrI	1746420	1746751	No
chrI	1746420	1747002	No
chrI	1746522	1747621	No
chrI	1746624	1746888	No
chrI	1746627	1747975	No
chrI	1746865	1747380	No
chrI	1747108	1747150	No
chrI	1747469	1747766	No
chrI	1747589	1747666	No
chrI	1747623	1748076	No
chrI	1747842	1747883	No
chrI	1747854	1748089	No
chrI	1749339	1749391	No
chrI	1749419	1749475	No
chrI	1750665	1750724	No
chrI	1751087	1751144	No
chrI	1754513	1754941	No
chrI	1754803	1754854	No
chrI	1754866	1754911	No
chrI	1755225	1755282	No
chrI	1755473	1755527	No
chrI	1755614	1758788	No
chrI	1758987	1759175	YES
chrI	1759802	1760436	No
chrI	1760063	1760384	No
chrI	1760063	1760384	No
chrI	1760840	1762256	No
chrI	1760840	1762260	No
chrI	1760840	1762260	No
chrI	1764389	1764467	No
chrI	1764460	1764516	No
chrI	1764460	1764517	No
chrI	1765755	1765791	No
chrI	1765868	1765939	No
chrI	1766119	1766170	No
chrI	1766207	1766277	YES
chrI	1766897	1767158	No
chrI	1768910	1768952	No
chrI	1770263	1770333	No
chrI	1770568	1770617	No
chrI	1770601	1770668	No
chrI	1770973	1771030	No
chrI	1771406	1771445	No
chrI	1771956	1772252	YES
chrI	1772406	1772611	YES
chrI	1772409	1772573	YES
chrI	1774139	1774178	No
chrI	1775034	1775065	YES
chrI	1782886	1783158	No
chrI	1782888	1783158	No
chrI	1782910	1783158	No
chrI	1783185	1783279	No
chrI	1783185	1783279	No
chrI	1783185	1783279	No
chrI	1783304	1783469	No
chrI	1783304	1783469	No
chrI	1783304	1783469	No
chrI	1783494	1783601	No
chrI	1783494	1783602	No
chrI	1783494	1783601	No
chrI	1783494	1783526	No
chrI	1784276	1784776	YES
chrI	1787441	1787943	No
chrI	1787492	1787555	No
chrI	1787516	1787564	No
chrI	1787612	1787675	No
chrI	1787636	1787684	No
chrI	1787653	1788074	No
chrI	1787813	1787871	No
chrI	1788561	1788624	No
chrI	1790673	1791230	No
chrI	1791824	1791877	No
chrI	1791943	1791988	No
chrI	1792018	1792106	No
chrI	1796435	1796947	No
chrI	1796470	1796940	No
chrI	1796665	1796926	No
chrI	1796728	1796926	No
chrI	1796751	1796840	No
chrI	1796869	1796926	No
chrI	1797118	1797199	No
chrI	1797798	1798303	No
chrI	1797927	1798072	No
chrI	1797969	1798027	No
chrI	1798395	1798464	No
chrI	1798981	1799381	No
chrI	1800076	1800114	No
chrI	1807411	1807810	No
chrI	1811900	1812698	No
chrI	1811907	1812033	No
chrI	1811946	1812701	No
chrI	1811948	1812640	No
chrI	1812352	1812628	No
chrI	1812462	1812542	No
chrI	1812504	1812665	No
chrI	1812527	1812646	No
chrI	1812554	1812739	No
chrI	1814494	1814853	No
chrI	1816356	1816907	No
chrI	1816356	1816906	No
chrI	1817742	1817891	No
chrI	1817748	1817891	No
chrI	1817749	1817890	No
chrI	1827760	1827800	No
chrI	1828816	1829001	No
chrI	1828865	1829001	No
chrI	1828933	1829001	No
chrI	1829054	1829066	No
chrI	1829054	1829066	No
chrI	1832754	1832808	No
chrI	1849546	1849618	No
chrI	1851133	1851336	No
chrI	1852481	1852734	YES
chrI	1852888	1853082	YES
chrI	1855529	1855581	No
chrI	1855531	1855591	No
chrI	1855990	1856044	No
chrI	1860872	1860932	No
chrI	1863297	1863334	No
chrI	1865918	1865974	No
chrI	1869884	1869952	No
chrI	1870232	1870312	No
chrI	1870419	1870610	No
chrI	1870591	1870674	No
chrI	1870680	1870760	No
chrI	1871094	1871177	YES
chrI	1871775	1871827	No
chrI	1872108	1872154	No
chrI	1872197	1872243	YES
chrI	1872197	1872243	YES
chrI	1872528	1872599	YES
chrI	1875932	1875995	YES
chrI	1875945	1876057	YES
chrI	1880284	1880373	YES
chrI	1881089	1881188	YES
chrI	1882778	1883283	YES
chrI	1882795	1883186	YES
chrI	1882920	1883282	YES
chrI	1884445	1884953	No
chrI	1884445	1884953	No
chrI	1884445	1884953	No
chrI	1886941	1886942	No
chrI	1888637	1888648	No
chrI	1888779	1888792	No
chrI	1890488	1890538	No
chrI	1890488	1890535	No
chrI	1891198	1891629	No
chrI	1893131	1893586	No
chrI	1893140	1893529	No
chrI	1893191	1893244	No
chrI	1893261	1893393	No
chrI	1893335	1893440	No
chrI	1893369	1893464	No
chrI	1893417	1893552	No
chrI	1893503	1893561	No
chrI	1896842	1896907	YES
chrI	1897354	1897394	No
chrI	1903069	1903106	No
chrI	1903179	1903300	No
chrI	1903197	1903258	No
chrI	1903241	1903300	No
chrI	1903334	1903571	No
chrI	1903488	1903571	No
chrI	1903606	1903693	No
chrI	1903606	1903763	No
chrI	1903650	1903727	No
chrI	1903665	1903724	No
chrI	1903798	1903857	No
chrI	1904020	1904083	No
chrI	1904526	1904596	YES
chrI	1908513	1908566	No
chrI	1908571	1908810	No
chrI	1908577	1908803	No
chrI	1908863	1908934	No
chrI	1909033	1909113	No
chrI	1910528	1910636	No
chrI	1910952	1911009	No
chrI	1919838	1921662	No
chrI	1919840	1921662	No
chrI	1919961	1921662	No
chrI	1921687	1921696	No
chrI	1921687	1921696	No
chrI	1921687	1921696	No
chrI	1921722	1921767	No
chrI	1921722	1921767	No
chrI	1921722	1921767	No
chrI	1921794	1921801	No
chrI	1921794	1921801	No
chrI	1921794	1921801	No
chrI	1921827	1921836	No
chrI	1921827	1921836	No
chrI	1921827	1921836	No
chrI	1921862	1921871	No
chrI	1921862	1921871	No
chrI	1921862	1921871	No
chrI	1921899	1921908	No
chrI	1921899	1921908	No
chrI	1921899	1921908	No
chrI	1921934	1922081	No
chrI	1921934	1922081	No
chrI	1921934	1922081	No
chrI	1923733	1923770	No
chrI	1924681	1924721	No
chrI	1925798	1925890	No
chrI	1926499	1926746	No
chrI	1926655	1926746	No
chrI	1926843	1926967	No
chrI	1926843	1926967	No
chrI	1927064	1927222	YES
chrI	1927064	1927222	YES
chrI	1927064	1927188	YES
chrI	1928980	1929029	No
chrI	1929024	1929038	No
chrI	1929414	1929437	YES
chrI	1929414	1929436	YES
chrI	1930029	1930030	No
chrI	1930250	1930303	No
chrI	1930463	1930524	No
chrI	1930758	1930800	No
chrI	1932259	1932307	No
chrI	1932734	1932775	YES
chrI	1934235	1934291	No
chrI	1935239	1938074	YES
chrI	1935240	1938260	YES
chrI	1938069	1938260	YES
chrI	1939340	1939545	No
chrI	1939340	1939420	No
chrI	1939376	1939509	No
chrI	1940677	1940784	No
chrI	1941788	1941861	No
chrI	1941806	1941859	No
chrI	1942433	1942593	No
chrI	1942477	1942610	No
chrI	1942498	1942578	No
chrI	1942539	1942594	No
chrI	1942847	1942939	No
chrI	1943699	1943769	No
chrI	1943878	1943992	No
chrI	1943937	1944002	No
chrI	1944040	1944088	No
chrI	1944098	1944602	No
chrI	1944190	1944336	No
chrI	1944273	1944328	No
chrI	1944341	1944443	No
chrI	1944342	1944437	No
chrI	1944361	1944459	No
chrI	1944396	1944459	No
chrI	1944452	1944533	No
chrI	1946926	1946995	No
chrI	1947016	1947021	No
chrI	1948697	1949368	No
chrI	1948850	1948888	No
chrI	1950002	1950343	No
chrI	1950002	1950352	No
chrI	1950002	1950352	No
chrI	1950443	1950527	No
chrI	1955650	1955810	YES
chrI	1955656	1955810	YES
chrI	1955692	1955810	YES
chrI	1955703	1955893	YES
chrI	1955743	1955921	No
chrI	1958325	1958365	No
chrI	1958784	1958821	YES
chrI	1959603	1959783	No
chrI	1959636	1959783	No
chrI	1959716	1959783	No
chrI	1959802	1959849	No
chrI	1959802	1959849	No
chrI	1959802	1959849	No
chrI	1959948	1959964	No
chrI	1959948	1959964	No
chrI	1959948	1959964	No
chrI	1960041	1960053	No
chrI	1960041	1960053	No
chrI	1960841	1960842	No
chrI	1961559	1961638	No
chrI	1962183	1962393	YES
chrI	1962489	1962531	No
chrI	1965287	1965618	No
chrI	1965287	1965618	No
chrI	1965683	1965794	No
chrI	1965683	1965794	No
chrI	1965828	1965892	No
chrI	1965828	1965903	No
chrI	1966091	1966109	No
chrI	1966443	1966485	No
chrI	1966443	1966491	No
chrI	1966863	1967492	YES
chrI	1966867	1967176	YES
chrI	1966937	1967028	YES
chrI	1967207	1967266	YES
chrI	1967296	1967465	YES
chrI	1967725	1967771	YES
chrI	1967725	1967769	YES
chrI	1973165	1973449	No
chrI	1984480	1984607	No
chrI	1984498	1984582	No
chrI	1987523	1987672	No
chrI	1987705	1987746	No
chrI	1989764	1989802	No
chrI	1989794	1989802	No
chrI	1989856	1989865	No
chrI	1989917	1989920	No
chrI	1990684	1990781	No
chrI	1991574	1991653	No
chrI	1991835	1992476	No
chrI	1994704	1994759	No
chrI	1995755	1995781	No
chrI	2003087	2003114	No
chrI	2005100	2005155	No
chrI	2005112	2005175	No
chrI	2005833	2005877	YES
chrI	2010106	2010155	YES
chrI	2014885	2015159	No
chrI	2014885	2015161	No
chrI	2016051	2016318	No
chrI	2016274	2016563	No
chrI	2016281	2016481	No
chrI	2018093	2018094	No
chrI	2018093	2018103	No
chrI	2018566	2018641	No
chrI	2018599	2018643	No
chrI	2020500	2020748	No
chrI	2020515	2020649	No
chrI	2022003	2022051	No
chrI	2023736	2023787	No
chrI	2025083	2025172	YES
chrI	2027405	2027544	YES
chrI	2027558	2027749	YES
chrI	2027694	2027774	YES
chrI	2032815	2032854	No
chrI	2036624	2036681	No
chrI	2039817	2039871	No
chrI	2043909	2043996	YES
chrI	2045883	2045968	YES
chrI	2053710	2053858	No
chrI	2053879	2054346	No
chrI	2054032	2054097	No
chrI	2054367	2054516	No
chrI	2058943	2058984	YES
chrI	2061611	2061650	No
chrI	2062591	2062621	YES
chrI	2063282	2063324	YES
chrI	2067444	2067517	No
chrI	2074436	2074503	YES
chrI	2088423	2088540	No
chrI	2097254	2097298	YES
chrI	2102587	2102679	No
chrI	2102783	2102851	No
chrI	2104175	2104258	YES
chrI	2104223	2104403	YES
chrI	2104223	2104302	YES
chrI	2104289	2104416	YES
chrI	2104299	2104359	YES
chrI	2104758	2104766	No
chrI	2104856	2104890	YES
chrI	2104856	2104890	YES
chrI	2107010	2107188	YES
chrI	2107996	2108465	YES
chrI	2107996	2108465	YES
chrI	2108002	2108465	YES
chrI	2108179	2108455	YES
chrI	2108250	2108445	YES
chrI	2108285	2108410	YES
chrI	2108348	2108410	YES
chrI	2109395	2109522	YES
chrI	2109488	2109548	No
chrI	2109630	2109718	YES
chrI	2109635	2109718	YES
chrI	2109682	2109718	YES
chrI	2109777	2109833	YES
chrI	2109777	2109806	YES
chrI	2109777	2109878	YES
chrI	2109891	2110017	YES
chrI	2112031	2112050	No
chrI	2112031	2112063	No
chrI	2112051	2112063	No
chrI	2112055	2112063	No
chrI	2112287	2112289	YES
chrI	2115661	2116118	YES
chrI	2118876	2119171	YES
chrI	2118876	2119171	YES
chrI	2121461	2121508	No
chrI	2121461	2121508	No
chrI	2122476	2122603	YES
chrI	2122484	2122632	YES
chrI	2122484	2122669	YES
chrI	2122484	2122639	YES
chrI	2122590	2122668	YES
chrI	2123513	2123560	No
chrI	2123637	2123687	No
chrI	2123828	2124136	No
chrI	2123905	2124158	No
chrI	2127774	2127802	No
chrI	2127967	2128043	YES
chrI	2128143	2128472	YES
chrI	2128143	2128472	YES
chrI	2128143	2128459	YES
chrI	2128160	2128281	YES
chrI	2134249	2134616	YES
chrI	2134269	2134325	No
chrI	2134303	2134374	No
chrI	2134312	2134653	YES
chrI	2134340	2134653	YES
chrI	2134387	2134600	YES
chrI	2134509	2134634	YES
chrI	2135499	2135546	No
chrI	2135609	2135675	No
chrI	2135889	2135928	No
chrI	2137044	2137091	No
chrI	2139375	2139645	YES
chrI	2143131	2143246	YES
chrI	2143457	2143517	YES
chrI	2143501	2143541	YES
chrI	2145151	2145234	No
chrI	2145160	2145234	No
[truncated: 40,733 more rows]
