# Supplementary material
Source: HighWire-hosted journal article supplement (doi:10.1101/rna.067405.118)
Supplement: Supplemental_File_S4.xlsx [file Supplemental_File_S4.xlsx]

## Sheet: Key
Column	Description
Cbr_gene	C. briggsae gene name
Cel_gene	C. elegans ortholog gene name
Cbr most structured intron (kcal/mol*nt)	Length-normalized folding free energy of the C. briggsae gene's most structured intron.
Cel most structured intron (kcal/mol*nt)	Length-normalized folding free energy of the C. elegans gene's most structured intron.

## Sheet: Supp_File_S4
Cbr_gene	Cel_gene	Cbr most structured intron (kcal/mol*nt)	Cel most structured intron (kcal/mol*nt)
CBG23843	C15C6.1	-0.544079	-0.532616
CBG20530	C16A11.10	-0.504436	-0.555403
CBG22476	C44B11.1	-0.548326	-0.505759
CBG07033	F11F1.1	-0.547113	-0.761518
CBG15371	F15D3.1	-0.507946	-0.594366
CBG13625	F16H6.9	-0.60884	-0.664007
CBG04359	F22G12.5	-0.64957	-0.737222
CBG05555	F25C8.3	-0.515386	-0.639404
CBG05609	F26F2.7	-0.545478	-0.559558
CBG07959	F28D9.2	-0.563553	-0.53072
CBG19719	F32A7.4	-0.511529	-0.511153
CBG17838	F48F5.5	-0.594536	-0.600101
CBG10547	F52C12.4	-0.535924	-0.703367
CBG13932	F53H1.3	-0.525329	-0.504014
CBG08775	F54D11.4	-0.516355	-0.786587
CBG05147	F56A6.4	-0.61686	-0.526465
CBG22482	F56F11.3	-0.525574	-0.500771
CBG03666	H20J04.3	-0.611766	-0.511734
CBG20417	H25P06.1	-0.668799	-0.725425
CBG22839	K02F6.7	-0.571741	-0.607554
CBG07728	K09A9.6	-0.614319	-0.539508
CBG16129	R09A1.1	-0.514495	-0.698201
CBG00038	R10F2.1	-0.521752	-0.546417
CBG00851	T03D8.5	-0.540864	-0.529283
CBG00847	T03D8.5	-0.510199	-0.529283
CBG13686	T06A10.1	-0.535453	-0.579601
CBG24316	T07D3.7	-0.599111	-0.53599
CBG21229	T08A11.1	-0.515119	-0.842697
CBG18446	T08H4.1	-0.500289	-0.654311
CBG07964	W02B9.1	-0.510729	-0.559989
CBG22670	W04C9.6	-0.529756	-0.520656
CBG13485	W06B4.3	-0.525451	-0.500812
CBG15722	W10C4.1	-0.58017	-0.53292
CBG13937	Y104H12D.1	-0.536964	-0.700018
CBG13938	Y104H12D.3	-0.513592	-0.658558
CBG24167	Y105C5B.11	-0.70447	-0.619205
CBG19786	Y105E8A.22	-0.539091	-0.542981
CBG19789	Y105E8A.23	-0.508028	-0.539721
CBG19799	Y105E8B.3	-0.580067	-0.552099
CBG19615	Y110A2AL.12	-0.571134	-0.669038
CBG19617	Y110A2AL.14	-0.580495	-0.65508
CBG20130	Y111B2A.14	-0.503572	-0.751587
CBG11682	Y111B2A.8	-0.501166	-0.541474
CBG00336	Y116A8C.13	-0.534594	-0.698801
CBG21793	Y116F11B.3	-0.675491	-0.513924
CBG07981	Y18D10A.9	-0.51939	-0.51515
CBG05152	Y18H1A.3	-0.558623	-0.789392
CBG05150	Y18H1A.4	-0.573118	-0.56357
CBG22075	Y20F4.3	-0.660897	-0.571443
CBG00834	Y25C1A.4	-0.508792	-0.526547
CBG23685	Y32G9A.6	-0.526515	-0.663444
CBG22032	Y34D9A.4	-0.5084	-0.704068
CBG18768	Y37A1B.2	-0.538663	-0.529003
CBG18756	Y37A1C.1	-0.541738	-0.573569
CBG22048	Y37E3.1	-0.681008	-0.625182
CBG22091	Y37E3.16	-0.599447	-0.621112
CBG08451	Y37F4.8	-0.568388	-0.556609
CBG13644	Y37H9A.3	-0.613297	-0.542102
CBG20326	Y39B6A.19	-0.587554	-0.526657
CBG23000	Y39E4B.12	-0.556844	-0.647124
CBG16072	Y43F11A.5	-0.589982	-0.754626
CBG24288	Y43F4B.9	-0.638722	-0.612976
CBG20400	Y43F8A.2	-0.524271	-0.594156
CBG05679	Y43F8B.1	-0.535209	-0.5178
CBG01440	Y45G5AM.2	-0.508484	-0.621476
CBG07904	Y46G5A.13	-0.545909	-0.555551
CBG21807	Y46H3A.6	-0.532738	-0.673748
CBG22510	Y48A5A.1	-0.630613	-0.52887
CBG08018	Y48G10A.4	-0.502533	-0.585213
CBG22015	Y48G1BL.2	-0.557164	-0.532111
CBG08495	Y48G8AL.11	-0.58372	-0.70066
CBG15647	Y48G9A.3	-0.510212	-0.612384
CBG11754	Y49E10.11	-0.512064	-0.65006
CBG11691	Y49E10.19	-0.508639	-0.663243
CBG11692	Y49E10.20	-0.545547	-0.651243
CBG15716	Y50D7A.7	-0.513404	-0.781984
CBG15708	Y50D7A.8	-0.516293	-0.594872
CBG12925	Y51A2D.18	-0.529252	-0.516943
CBG20909	Y53F4B.15	-0.52032	-0.587924
CBG20911	Y53F4B.21	-0.566422	-0.595258
CBG26135	Y53G8AL.1	-0.819195	-0.61022
CBG19705	Y54E5B.2	-0.506207	-0.523265
CBG13900	Y54G2A.2	-0.599111	-0.860506
CBG15201	Y55B1BR.4	-0.644823	-0.554391
CBG15732	Y55D5A.5	-0.514733	-0.758252
CBG13987	Y55F3AL.1	-0.568343	-0.634712
CBG13990	Y55F3BL.2	-0.746653	-0.668654
CBG24636	Y60A3A.1	-0.648498	-0.541177
CBG24635	Y60A3A.1	-0.625219	-0.541177
CBG15845	Y64G10A.7	-0.616738	-0.50806
CBG22497	Y69A2AR.16	-0.545168	-0.625762
CBG19779	Y6B3A.1	-0.514662	-0.610919
CBG22130	Y71G12A.2	-0.569555	-0.715748
CBG25184	Y71G12B.11	-0.553362	-0.535368
CBG22146	Y71G12B.35	-0.509755	-0.599497
CBG13870	Y73B3A.3	-0.556823	-0.506286
CBG22162	Y73E7A.9	-0.593652	-0.612783
CBG03566	Y75B8A.24	-0.555221	-0.653912
CBG00495	Y75B8A.26	-0.645657	-0.535491
CBG08145	Y75B8A.26	-0.550152	-0.535491
CBG08146	Y75B8A.26	-0.500065	-0.535491
CBG11769	Y75B8A.33	-0.503855	-0.571444
CBG16807	Y76B12C.1	-0.55309	-0.543504
CBG22517	Y76B12C.1	-0.500381	-0.543504
CBG16810	Y76B12C.6	-0.657647	-0.620076
CBG16808	Y76B12C.7	-0.606659	-0.810733
CBG13923	Y77E11A.11	-0.56437	-0.746175
CBG11722	Y82E9BR.18	-0.554034	-0.782457
CBG19811	Y82E9BR.19	-0.51737	-0.623656
CBG08041	Y87G2A.16	-0.542568	-0.727351
CBG08036	Y87G2A.9	-0.503287	-0.586015
CBG15101	Y92H12BL.1	-0.509692	-0.741491
CBG05122	Y95B8A.12	-0.5352	-0.571947
CBG18556	Y95B8A.5	-0.513527	-0.849124
CBG18548	Y95B8A.5	-0.511889	-0.849124
CBG18546	Y95B8A.6	-0.51097	-0.540733
CBG13470	B0304.1	-0.44639	-0.521173
CBG05672	B0399.1	-0.357982	-0.519962
CBG05673	B0399.1	-0.339834	-0.519962
CBG15150	BE0003N10.3	-0.462072	-0.694133
CBG08428	C01A2.2	-0.35604	-0.522677
CBG03656	C01F1.3	-0.443841	-0.567091
CBG03659	C01F1.6	-0.39748	-0.604089
CBG08175	C04E7.4	-0.274207	-0.523075
CBG04136	C05D9.1	-0.391809	-0.518827
CBG07586	C05G5.5	-0.352394	-0.505856
CBG07587	C05G5.5	-0.251078	-0.505856
CBG21293	C05G6.1	-0.393564	-0.5017
CBG21251	C05G6.1	-0.337618	-0.5017
CBG05657	C06H5.6	-0.3728	-0.534094
CBG05651	C06H5.8	-0.332174	-0.603957
CBG16375	C11G6.4	-0.288723	-0.554301
CBG10471	C14C6.13	-0.255872	-0.699899
CBG23842	C15C6.4	-0.454792	-0.52723
CBG08909	C16A11.10	-0.387306	-0.555403
CBG08906	C16A11.10	-0.359966	-0.555403
CBG08914	C16A11.10	-0.34087	-0.555403
CBG08911	C16A11.10	-0.340154	-0.555403
CBG08913	C16A11.10	-0.325314	-0.555403
CBG08910	C16A11.10	-0.311824	-0.555403
CBG08907	C16A11.10	-0.302712	-0.555403
CBG08905	C16A11.10	-0.298929	-0.555403
CBG08908	C16A11.10	-0.296757	-0.555403
CBG08912	C16A11.10	-0.287818	-0.555403
CBG15358	C17D12.2	-0.492937	-0.502172
CBG15805	C17D12.7	-0.464811	-0.653266
CBG01326	C17E7.3	-0.237093	-0.77951
CBG08809	C18G1.6	-0.377328	-0.617279
CBG06998	C23H3.3	-0.308467	-0.541341
CBG10553	C23H5.1	-0.457815	-0.502575
CBG22520	C23H5.11	-0.430356	-0.566584
CBG07568	C26G2.1	-0.376417	-0.683321
CBG15978	C30G4.3	-0.398897	-0.611812
CBG19450	C30G4.6	-0.463706	-0.57047
CBG15986	C30G4.6	-0.204977	-0.57047
CBG24536	C35B1.2	-0.387531	-0.78604
CBG24538	C35B1.2	-0.36686	-0.78604
CBG18813	C37A5.1	-0.469291	-0.508932
CBG08829	C37H5.6	-0.316957	-0.513337
CBG08825	C37H5.9	-0.473347	-0.597268
CBG22837	C39B5.1	-0.358621	-0.604224
CBG01426	C39B5.1	-0.352504	-0.604224
CBG05002	C39B5.1	-0.345652	-0.604224
CBG22838	C39B5.1	-0.225711	-0.604224
CBG04004	C41D11.3	-0.344249	-0.525857
CBG03999	C41D11.7	-0.417079	-0.599831
CBG25825	C44B11.1	-0.40631	-0.505759
CBG07710	C46E1.2	-0.439882	-0.63119
CBG04937	C46E1.2	-0.382996	-0.63119
CBG07708	C46E1.3	-0.420097	-0.513723
CBG00449	C49C3.4	-0.309295	-0.678584
CBG10558	C54E4.2	-0.467094	-0.562616
CBG21865	D2063.3	-0.493762	-0.70376
CBG21864	D2063.4	-0.482877	-0.503095
CBG15992	E03G2.3	-0.370658	-0.503903
CBG16933	F02C9.3	-0.467832	-0.579607
CBG04332	F02E11.1	-0.416027	-0.522112
CBG18782	F09C3.1	-0.485778	-0.609855
CBG22907	F09C6.9	-0.452023	-0.685793
CBG01473	F09D12.1	-0.359822	-0.557
CBG15203	F10C5.1	-0.315337	-0.537872
CBG15202	F10C5.2	-0.250169	-0.515037
CBG15927	F10D7.5	-0.429885	-0.565892
CBG15934	F10D7.5	-0.392992	-0.565892
CBG15803	F11A6.1	-0.486495	-0.50111
CBG24064	F11D11.11	-0.397012	-0.654534
CBG24059	F11D11.11	-0.356875	-0.654534
CBG23839	F14B6.2	-0.38218	-0.636897
CBG15779	F14F7.4	-0.347508	-0.518907
CBG20952	F15A4.3	-0.452102	-0.557266
CBG15375	F15D3.1	-0.467616	-0.594366
CBG13669	F15E6.1	-0.47103	-0.699996
CBG08466	F16H6.9	-0.368365	-0.664007
CBG10540	F18F11.3	-0.490312	-0.79304
CBG11734	F18F11.3	-0.445252	-0.79304
CBG11732	F18F11.3	-0.41983	-0.79304
CBG04367	F22G12.4	-0.427943	-0.519195
CBG04368	F22G12.4	-0.357524	-0.519195
CBG16191	F23D12.1	-0.347	-0.510958
CBG07010	F23F1.3	-0.33711	-0.578475
CBG07009	F23F1.3	-0.224214	-0.578475
CBG05573	F31D4.1	-0.393846	-0.528509
CBG05563	F31D4.5	-0.436381	-0.529904
CBG21974	F31D5.5	-0.495727	-0.528881
CBG15380	F32B4.6	-0.411852	-0.546677
CBG04379	F32B4.8	-0.430809	-0.575868
CBG21866	F32D1.1	-0.37023	-0.583615
CBG23625	F32D1.5	-0.050022	-0.584941
CBG07577	F33C8.1	-0.486241	-0.674442
CBG19758	F33H2.5	-0.467339	-0.512661
CBG00786	F36F12.8	-0.240622	-0.593817
CBG07155	F45D11.10	-0.465268	-0.651425
CBG00313	F45D11.10	-0.449272	-0.651425
CBG07212	F47F6.1	-0.457939	-0.519455
CBG07211	F47F6.1	-0.39385	-0.519455
CBG17836	F48F5.5	-0.432205	-0.600101
CBG17837	F48F5.5	-0.424441	-0.600101
CBG08739	F49B2.6	-0.326587	-0.628789
CBG20406	F49D11.10	-0.396912	-0.554338
CBG18764	F52B11.1	-0.392905	-0.647193
CBG08162	F52D1.1	-0.325822	-0.536797
CBG11745	F53A3.4	-0.410164	-0.580652
CBG11746	F53A3.4	-0.378833	-0.580652
CBG11690	F53A3.4	-0.321944	-0.580652
CBG18435	F53C3.13	-0.341839	-0.54314
CBG05626	F53F8.5	-0.24542	-0.603622
CBG20441	F53G2.7	-0.436726	-0.621078
CBG13933	F53H1.4	-0.449	-0.587363
CBG17053	F54A3.5	-0.387795	-0.644325
CBG00463	F54C4.3	-0.409224	-0.573282
CBG08774	F54D11.4	-0.290259	-0.786587
CBG07178	F54D12.8	-0.315962	-0.578789
CBG11643	F56A4.7	-0.481802	-0.684006
CBG03576	F56A8.4	-0.349783	-0.617121
CBG23909	F56B3.6	-0.348353	-0.727301
CBG16240	F56C3.6	-0.292053	-0.635137
CBG11771	F56F11.4	-0.399376	-0.505437
CBG20343	F56F11.4	-0.324722	-0.505437
CBG20339	F56F11.4	-0.322274	-0.505437
CBG15155	F58B6.3	-0.495492	-0.513532
CBG15833	F58D5.2	-0.259136	-0.60222
CBG15834	F58D5.4	-0.498207	-0.550707
CBG23018	F58F6.4	-0.410191	-0.503406
CBG05683	F59A1.10	-0.274425	-0.512432
CBG05658	F59A1.15	-0.416397	-0.580158
CBG07755	F59D12.2	-0.400007	-0.530338
CBG07751	F59D12.3	-0.280093	-0.527069
CBG01356	F59D6.3	-0.28281	-0.714279
CBG16008	F59F4.1	-0.335531	-0.614732
CBG22467	H06I04.3	-0.39357	-0.528282
CBG15729	H10E21.2	-0.470811	-0.53714
CBG15657	H14E04.5	-0.369244	-0.513262
CBG07075	H17B01.1	-0.389969	-0.542256
CBG24583	H22D07.1	-0.444162	-0.620601
CBG20416	H25P06.2	-0.401351	-0.902751
CBG01436	H43I07.3	-0.304264	-0.539132
CBG08191	K02F6.7	-0.405739	-0.607554
CBG04334	K02F6.9	-0.481875	-0.519883
CBG08796	K03B4.1	-0.431927	-0.584821
CBG18825	K03D10.3	-0.419038	-0.626495
CBG14955	K03E5.1	-0.441368	-0.533258
CBG14952	K03E5.3	-0.307578	-0.541258
CBG13561	K03H6.5	-0.384575	-0.542512
CBG18789	K04H8.2	-0.49724	-0.50544
CBG19743	K05C4.11	-0.371928	-0.543222
CBG04165	K07A3.1	-0.294926	-0.53121
CBG19613	K08A2.4	-0.436293	-0.559811
CBG19604	K08A2.5	-0.392909	-0.575708
CBG13973	K08D10.2	-0.326711	-0.505173
CBG04182	K09H9.3	-0.275064	-0.564017
CBG15703	K10F12.3	-0.347581	-0.685266
CBG04202	M01B12.4	-0.331591	-0.59018
CBG22219	M01D7.2	-0.332175	-0.638316
CBG22217	M01D7.4	-0.410108	-0.520327
CBG08136	M6.1	-0.356519	-0.931968
CBG22518	R05C11.1	-0.374878	-0.605496
CBG26534	R05C11.1	-0.309859	-0.605496
CBG24559	R05D7.3	-0.388494	-0.523674
CBG11089	R06A4.4	-0.472251	-0.511463
CBG11099	R06A4.7	-0.411122	-0.517429
CBG18688	R06C1.2	-0.441962	-0.512612
CBG07629	R07D5.2	-0.406071	-0.537319
CBG21165	R09A1.1	-0.434442	-0.698201
CBG00904	R09A1.1	-0.431413	-0.698201
CBG16098	R09A1.1	-0.353157	-0.698201
CBG15736	R10F2.1	-0.471875	-0.546417
CBG15733	R10F2.1	-0.440436	-0.546417
CBG15734	R10F2.5	-0.351754	-0.502099
CBG01487	R10F2.6	-0.436276	-0.566683
CBG22115	R119.2	-0.424816	-0.506037
CBG22118	R119.5	-0.439949	-0.594497
CBG20303	R148.7	-0.445043	-0.611991
CBG11740	R155.1	-0.452864	-0.579422
CBG10478	T03D3.5	-0.406753	-0.553796
CBG11271	T03D8.5	-0.490159	-0.529283
CBG00850	T03D8.5	-0.474069	-0.529283
CBG17049	T03D8.5	-0.468567	-0.529283
CBG05567	T03D8.5	-0.463818	-0.529283
CBG10474	T03D8.5	-0.410333	-0.529283
CBG07084	T04B8.5	-0.476033	-0.530395
CBG13871	T04C4.1	-0.425019	-0.572306
CBG13685	T06A10.1	-0.368698	-0.579601
CBG05161	T06A4.1	-0.405457	-0.553252
CBG05159	T06A4.2	-0.245862	-0.622789
CBG05160	T06A4.3	-0.435685	-0.529413
CBG13539	T07A9.5	-0.479205	-0.506058
CBG13492	T07A9.8	-0.244133	-0.670781
CBG08711	T07D10.6	-0.233655	-0.544284
CBG07340	T07D3.7	-0.323368	-0.53599
CBG21231	T08A11.1	-0.46833	-0.842697
CBG15947	T08G2.2	-0.377267	-0.596502
CBG21817	T10B5.5	-0.371341	-0.631061
CBG13488	T12C9.3	-0.47915	-0.550915
CBG03693	T12C9.3	-0.437502	-0.550915
CBG07203	T13B5.3	-0.439235	-0.624573
CBG15267	T19C3.8	-0.460699	-0.508893
CBG08130	T19D7.1	-0.173558	-0.623341
CBG23894	T20B3.1	-0.465764	-0.557864
CBG16257	T20F7.5	-0.344609	-0.506038
CBG22550	T21D12.12	-0.37443	-0.660226
CBG01315	T22F3.2	-0.287085	-0.61192
CBG01313	T22F3.3	-0.384467	-0.700435
CBG01316	T22F3.5	-0.383673	-0.555015
CBG01379	T22H9.2	-0.475062	-0.553437
CBG08954	T23E1.1	-0.35401	-0.745808
CBG10404	T23G4.4	-0.434064	-0.510068
CBG22592	T23G4.4	-0.235756	-0.510068
CBG01303	T24A6.20	-0.346656	-0.528515
CBG01304	T24A6.20	-0.32284	-0.528515
CBG17105	T25E12.4	-0.421446	-0.649961
CBG24573	T28F12.3	-0.383101	-0.597715
CBG27399	VB0395L.1	-0.293075	-0.607159
CBG14974	W01B11.2	-0.369133	-0.503803
CBG13604	W02A11.4	-0.386329	-0.537607
CBG08720	W02D9.1	-0.20666	-0.522262
CBG20998	W03H9.4	-0.374609	-0.801659
CBG13620	W04A8.7	-0.393747	-0.527399
CBG15659	W04B5.4	-0.436488	-0.539234
CBG25180	W04C9.6	-0.464786	-0.520656
CBG14963	W05F2.7	-0.354863	-0.57195
CBG13487	W06B4.2	-0.372023	-0.556663
CBG23896	W06H3.3	-0.467215	-0.566974
CBG15706	W07B3.2	-0.36616	-0.54961
CBG07092	W08F4.7	-0.438168	-0.590901
CBG07093	W08F4.7	-0.429583	-0.590901
CBG22811	W08G11.3	-0.448522	-0.515522
CBG21769	W09B6.3	-0.406197	-0.511418
CBG19775	W09C5.5	-0.38585	-0.504824
CBG13950	W09G12.9	-0.218418	-0.52632
CBG04233	W10C8.4	-0.359	-0.808675
CBG16386	W10G6.2	-0.374184	-0.501698
CBG23895	Y102A5A.1	-0.416419	-0.705924
CBG13700	Y105C5A.15	-0.419662	-0.625941
CBG00323	Y105C5B.10	-0.428334	-0.540419
CBG13799	Y105C5B.10	-0.425367	-0.540419
CBG15160	Y105C5B.11	-0.452407	-0.619205
CBG24297	Y105C5B.11	-0.429714	-0.619205
CBG24166	Y105C5B.11	-0.425197	-0.619205
CBG15161	Y105C5B.11	-0.417441	-0.619205
CBG16322	Y105C5B.11	-0.367771	-0.619205
CBG13820	Y105C5B.28	-0.410027	-0.534199
CBG08751	Y105E8A.12	-0.436011	-0.618739
CBG08755	Y105E8A.17	-0.235755	-0.540653
CBG08741	Y105E8A.2	-0.341637	-0.702337
CBG19783	Y105E8A.20	-0.415761	-0.557384
CBG19785	Y105E8A.21	-0.433469	-0.826796
CBG19788	Y105E8A.26	-0.413561	-0.524754
CBG08742	Y105E8A.3	-0.251554	-0.614826
CBG08744	Y105E8A.5	-0.304119	-0.645999
CBG08746	Y105E8A.7	-0.363593	-0.501048
CBG19796	Y105E8B.2	-0.293238	-0.702038
CBG19798	Y105E8B.4	-0.462409	-0.671867
CBG19800	Y105E8B.5	-0.318418	-0.620482
CBG19797	Y105E8B.7	-0.34016	-0.587662
CBG13827	Y10G11A.1	-0.406684	-0.607905
CBG19582	Y110A2AL.8	-0.465565	-0.560425
CBG20120	Y111B2A.10	-0.348174	-0.725643
CBG20126	Y111B2A.11	-0.443286	-0.753793
CBG20127	Y111B2A.12	-0.466365	-0.686598
CBG03560	Y111B2A.15	-0.493861	-0.677843
CBG03561	Y111B2A.16	-0.25176	-0.514303
CBG03562	Y111B2A.17	-0.37035	-0.605148
CBG03564	Y111B2A.19	-0.345072	-0.699332
CBG00501	Y111B2A.20	-0.426626	-0.644302
CBG00498	Y111B2A.22	-0.388815	-0.789364
CBG00497	Y111B2A.22	-0.360665	-0.789364
CBG03565	Y111B2A.24	-0.447214	-0.816635
CBG20118	Y111B2A.4	-0.448663	-0.7284
CBG12918	Y113G7A.3	-0.374484	-0.562879
CBG12934	Y113G7A.8	-0.421533	-0.63923
CBG12911	Y113G7B.18	-0.491447	-0.782671
CBG12912	Y113G7B.23	-0.367277	-0.637403
CBG00339	Y116A8C.16	-0.493839	-0.730391
CBG15771	Y116A8C.23	-0.318906	-0.661057
CBG00424	Y116A8C.28	-0.325614	-0.782147
CBG00422	Y116A8C.30	-0.352584	-0.569709
CBG00419	Y116A8C.35	-0.339167	-0.515094
CBG26273	Y116F11B.13	-0.37161	-0.515321
CBG21794	Y116F11B.3	-0.296159	-0.513924
CBG15148	Y119D3B.11	-0.422709	-0.517812
CBG15694	Y119D3B.17	-0.42276	-0.560515
CBG07680	Y15E3A.1	-0.364563	-0.584989
CBG21011	Y17G7B.15	-0.429734	-0.591392
CBG21026	Y17G7B.2	-0.316818	-0.673372
CBG21016	Y17G7B.9	-0.393069	-0.51323
CBG07977	Y18D10A.1	-0.428776	-0.608655
CBG07989	Y18D10A.13	-0.491795	-0.736737
CBG07972	Y18D10A.5	-0.381762	-0.576446
CBG05196	Y18H1A.1	-0.357193	-0.545443
CBG05151	Y18H1A.2	-0.268355	-0.55618
CBG05155	Y18H1A.6	-0.378529	-0.618099
CBG25140	Y19D10A.13	-0.343962	-0.561224
CBG15693	Y22D7AL.16	-0.401007	-0.585966
CBG11698	Y22D7AL.4	-0.446569	-0.517564
CBG11700	Y22D7AL.4	-0.286274	-0.517564
CBG15216	Y22D7AL.7	-0.21425	-0.804151
CBG17491	Y22D7AR.12	-0.441538	-0.592625
CBG17489	Y22D7AR.12	-0.432041	-0.592625
CBG14988	Y23H5A.4	-0.280511	-0.616614
CBG14987	Y23H5A.5	-0.368302	-0.51858
CBG04128	Y23H5A.7	-0.266435	-0.610044
CBG03992	Y23H5B.6	-0.221955	-0.88311
CBG22527	Y24D9B.1	-0.443634	-0.61735
CBG19635	Y25C1A.5	-0.367163	-0.562956
CBG23974	Y32B12B.2	-0.469897	-0.513984
CBG21818	Y32G9A.8	-0.384254	-0.544977
CBG22031	Y34D9A.1	-0.43469	-0.745049
CBG22083	Y34D9A.10	-0.485216	-0.594311
CBG22082	Y34D9A.2	-0.336076	-0.689065
CBG22035	Y34D9A.7	-0.421768	-0.559037
CBG22085	Y34D9A.8	-0.300782	-0.523371
CBG18766	Y37A1B.2	-0.304445	-0.529003
CBG15766	Y37D8A.13	-0.492382	-0.653497
CBG15760	Y37D8A.17	-0.383228	-0.659995
CBG15759	Y37D8A.18	-0.367373	-0.636138
CBG15758	Y37D8A.19	-0.358409	-0.688253
CBG15744	Y37D8A.2	-0.443388	-0.660867
CBG15757	Y37D8A.21	-0.393655	-0.592749
CBG15768	Y37D8A.9	-0.420655	-0.728501
CBG21613	Y37D8A.9	-0.26163	-0.728501
CBG08291	Y37E11AM.1	-0.380738	-0.899947
CBG08294	Y37E11AM.3	-0.368673	-0.573766
CBG08327	Y37E11B.4	-0.403242	-0.744561
CBG22041	Y37E3.10	-0.370756	-0.759167
CBG22040	Y37E3.11	-0.39	-0.62891
CBG22037	Y37E3.13	-0.476949	-0.557167
CBG22089	Y37E3.15	-0.39521	-0.774948
CBG22093	Y37E3.17	-0.498715	-0.618877
CBG22090	Y37E3.19	-0.434359	-0.508535
CBG08450	Y37F4.6	-0.366451	-0.835067
CBG15989	Y37H2C.1	-0.498768	-0.508137
CBG15988	Y37H2C.1	-0.329935	-0.508137
CBG10314	Y38E10A.10	-0.320198	-0.513953
CBG10315	Y38E10A.10	-0.30312	-0.513953
CBG10331	Y38E10A.19	-0.411553	-0.510099
CBG10338	Y38E10A.21	-0.482266	-0.563692
CBG10339	Y38E10A.22	-0.452898	-0.637516
CBG19514	Y38E10A.6	-0.402834	-0.804609
CBG19529	Y38E10A.6	-0.30856	-0.804609
CBG16826	Y38F2AL.3	-0.432031	-0.640859
CBG16818	Y38F2AR.5	-0.378811	-0.679572
CBG05620	Y38H6A.3	-0.399824	-0.623969
CBG15122	Y39A3B.5	-0.453963	-0.58933
CBG15135	Y39A3CL.1	-0.496582	-0.767586
CBG15186	Y39A3CR.3	-0.408278	-0.524265
CBG26086	Y39A3CR.7	-0.319625	-0.532927
CBG20528	Y39B6A.2	-0.422564	-0.803758
CBG23703	Y39B6A.36	-0.415408	-0.612991
CBG23814	Y39B6A.41	-0.422807	-0.504154
CBG23815	Y39B6A.43	-0.367088	-0.611318
CBG22998	Y39E4B.10	-0.473347	-0.706668
CBG24161	Y39E4B.3	-0.490488	-0.704692
CBG24160	Y39E4B.7	-0.452506	-0.66918
CBG22996	Y39E4B.9	-0.453796	-0.607238
CBG22997	Y39E4B.9	-0.39518	-0.607238
CBG23567	Y39F10B.1	-0.416011	-0.55232
CBG08015	Y40B1B.6	-0.479768	-0.549226
CBG13738	Y40H7A.10	-0.431424	-0.588869
CBG13570	Y41D4B.11	-0.34596	-0.817219
CBG13569	Y41D4B.12	-0.100744	-0.576842
CBG13568	Y41D4B.13	-0.270078	-0.645779
CBG13567	Y41D4B.19	-0.35337	-0.777363
CBG13579	Y41D4B.21	-0.340056	-0.525472
CBG13581	Y41D4B.4	-0.455995	-0.632286
CBG22332	Y41E3.19	-0.336868	-0.518302
CBG13773	Y41E3.4	-0.41453	-0.586672
CBG13770	Y41E3.9	-0.436862	-0.680387
CBG13665	Y43F11A.5	-0.485957	-0.754626
CBG03572	Y43F4B.3	-0.496526	-0.656361
CBG10227	Y43F4B.3	-0.327297	-0.656361
CBG24287	Y43F4B.7	-0.425519	-0.626916
CBG05634	Y43F8A.3	-0.374362	-0.561237
CBG05670	Y43F8B.3	-0.351757	-0.564612
CBG05686	Y43F8C.3	-0.299901	-0.549199
CBG07029	Y43H11AL.1	-0.450902	-0.781453
CBG07027	Y43H11AL.3	-0.332523	-0.715837
CBG14967	Y44E3A.6	-0.293	-0.59935
CBG14982	Y44E3B.2	-0.33357	-0.556175
CBG22378	Y45F10D.7	-0.347733	-0.669598
CBG26995	Y45G5AL.2	-0.483997	-0.625233
CBG01439	Y45G5AM.1	-0.477253	-0.585627
CBG01446	Y45G5AM.6	-0.437638	-0.522358
CBG11863	Y45G5AM.8	-0.346909	-0.716658
CBG01438	Y45G5AM.9	-0.444904	-0.64394
CBG15870	Y46C8AR.3	-0.414013	-0.573535
CBG15869	Y46C8AR.3	-0.321819	-0.573535
CBG07920	Y46G5A.1	-0.497089	-0.574375
CBG07907	Y46G5A.10	-0.414077	-0.586618
CBG08047	Y46G5A.10	-0.414077	-0.586618
CBG07906	Y46G5A.10	-0.316617	-0.586618
CBG07886	Y46G5A.17	-0.473449	-0.540951
CBG07887	Y46G5A.18	-0.287852	-0.626653
CBG07888	Y46G5A.19	-0.428	-0.630305
CBG07915	Y46G5A.2	-0.377403	-0.66722
CBG18430	Y46G5A.21	-0.478213	-0.512827
CBG18401	Y46G5A.31	-0.418047	-0.681488
CBG24582	Y47D7A.14	-0.445675	-0.62062
CBG14947	Y47G6A.10	-0.34647	-0.580267
CBG14959	Y47G6A.11	-0.306638	-0.614578
CBG14958	Y47G6A.13	-0.2942	-0.879075
CBG14942	Y47G6A.17	-0.434025	-0.718824
CBG14940	Y47G6A.18	-0.279468	-0.578479
CBG14936	Y47G6A.20	-0.460058	-0.540637
CBG14931	Y47G6A.23	-0.312899	-0.620913
CBG14957	Y47G6A.28	-0.333426	-0.557827
CBG14935	Y47G6A.4	-0.300435	-0.704483
CBG14939	Y47G6A.6	-0.311125	-0.735232
CBG18681	Y47H10A.5	-0.4256	-0.548043
CBG23851	Y47H10A.5	-0.388386	-0.548043
CBG15860	Y47H9C.2	-0.377421	-0.569343
CBG20900	Y48B6A.3	-0.36882	-0.698756
CBG22065	Y48G1A.3	-0.428445	-0.520213
CBG08488	Y48G8AL.1	-0.432526	-0.817875
CBG08513	Y48G8AL.10	-0.449129	-0.770584
CBG08493	Y48G8AL.5	-0.417338	-0.558052
CBG08491	Y48G8AL.5	-0.365402	-0.558052
CBG08494	Y48G8AL.6	-0.297529	-0.726445
CBG08509	Y48G8AL.7	-0.175652	-0.529147
CBG15268	Y48G9A.3	-0.443675	-0.612384
CBG15645	Y48G9A.3	-0.412674	-0.612384
CBG15109	Y48G9A.8	-0.397125	-0.529577
CBG11693	Y49E10.21	-0.447771	-0.52464
CBG17762	Y49F6B.10	-0.2085	-0.545416
CBG22120	Y50C1A.1	-0.440375	-0.566354
CBG23991	Y50D4A.1	-0.359576	-0.624217
CBG23990	Y50D4A.1	-0.338582	-0.624217
CBG11897	Y50D4A.1	-0.312979	-0.624217
CBG15718	Y50D7A.10	-0.311888	-0.674755
CBG15720	Y50D7A.6	-0.475015	-0.614839
CBG22135	Y51F10.10	-0.357485	-0.571964
CBG22136	Y51F10.2	-0.354964	-0.682663
CBG22132	Y51F10.3	-0.448037	-0.586913
CBG22127	Y51F10.5	-0.372568	-0.545669
CBG22129	Y51F10.7	-0.322919	-0.693501
CBG13664	Y51H4A.3	-0.410277	-0.560364
CBG07196	Y51H7C.11	-0.423521	-0.616684
CBG16811	Y51H7C.5	-0.383833	-0.615655
CBG07954	Y52B11C.1	-0.492688	-0.502747
CBG20907	Y53F4B.13	-0.435963	-0.528444
CBG20906	Y53F4B.13	-0.242388	-0.528444
CBG20910	Y53F4B.39	-0.348984	-0.608212
CBG20299	Y53G8AL.1	-0.464211	-0.61022
CBG15679	Y53G8AM.8	-0.450413	-0.599681
CBG04170	Y54E10A.10	-0.302784	-0.549866
CBG25264	Y54E10A.11	-0.327612	-0.644422
CBG04168	Y54E10A.17	-0.247168	-0.537225
CBG25217	Y54E10A.2	-0.393608	-0.60132
CBG14980	Y54E10A.2	-0.272233	-0.60132
CBG14979	Y54E10A.3	-0.288658	-0.579095
CBG14960	Y54E10A.4	-0.28628	-0.616314
CBG22257	Y54E10A.4	-0.231288	-0.616314
CBG04171	Y54E10A.5	-0.244045	-0.512181
CBG04172	Y54E10A.6	-0.17517	-0.558678
CBG04187	Y54E10BL.4	-0.284882	-0.635235
CBG04188	Y54E10BL.5	-0.236326	-0.512283
CBG04190	Y54E10BL.6	-0.399917	-0.622704
CBG04200	Y54E10BR.1	-0.323304	-0.593791
CBG04196	Y54E10BR.2	-0.308882	-0.71275
CBG04192	Y54E10BR.4	-0.323574	-0.68038
CBG04197	Y54E10BR.7	-0.386545	-0.782897
CBG04199	Y54E10BR.8	-0.337308	-0.53954
CBG04262	Y54E2A.1	-0.448694	-0.58658
CBG04256	Y54E2A.5	-0.382051	-0.549528
CBG19751	Y54E5A.4	-0.478722	-0.522673
CBG15669	Y54F10AL.1	-0.28053	-0.600555
CBG15663	Y54F10BM.1	-0.376066	-0.668118
CBG15665	Y54F10BM.12	-0.321206	-0.517532
CBG15793	Y54F10BM.12	-0.321206	-0.517532
CBG20408	Y54G2A.12	-0.384018	-0.524901
CBG13533	Y54G2A.17	-0.277922	-0.677518
CBG13528	Y54G2A.31	-0.218689	-0.615178
CBG15258	Y55B1AL.3	-0.292465	-0.557157
CBG15259	Y55B1AR.2	-0.362789	-0.644218
CBG15698	Y55B1BL.1	-0.362448	-0.524412
CBG15699	Y55B1BM.1	-0.4611	-0.646498
CBG00476	Y55D5A.3	-0.444122	-0.567714
CBG00471	Y55D5A.4	-0.423178	-0.561058
CBG22539	Y55F3AM.14	-0.395363	-0.553354
CBG13968	Y55F3AM.6	-0.356088	-0.778427
CBG13983	Y55F3BR.2	-0.490556	-0.512324
CBG13980	Y55F3BR.2	-0.485738	-0.512324
CBG15281	Y55F3BR.2	-0.356476	-0.512324
CBG15282	Y55F3BR.2	-0.32052	-0.512324
CBG23901	Y55F3BR.4	-0.48782	-0.521577
CBG07183	Y55F3C.9	-0.441363	-0.545465
CBG24348	Y55F3C.9	-0.385902	-0.545465
CBG20921	Y57A10A.18	-0.401522	-0.684198
CBG20932	Y57A10A.26	-0.468772	-0.589646
CBG24279	Y57A10A.30	-0.191836	-0.51069
CBG20927	Y57A10A.31	-0.431071	-0.530723
CBG20167	Y57A10A.31	-0.32211	-0.530723
CBG20920	Y57A10A.35	-0.385668	-0.622195
CBG15898	Y57A10A.7	-0.366381	-0.63084
CBG21499	Y57G11C.22	-0.365531	-0.551932
CBG05655	Y59A8A.1	-0.211755	-0.754506
CBG05656	Y59A8A.2	-0.305468	-0.732818
CBG05654	Y59A8A.3	-0.272667	-0.635667
CBG05643	Y59A8B.1	-0.328512	-0.547747
CBG05648	Y59A8B.13	-0.263962	-0.782088
CBG05647	Y59A8B.14	-0.401794	-0.653117
CBG05646	Y59A8B.21	-0.356316	-0.507228
CBG05645	Y59A8B.22	-0.38358	-0.759164
CBG05644	Y59A8B.23	-0.441755	-0.534271
CBG05596	Y59A8B.6	-0.408577	-0.661794
CBG01259	Y5H2B.2	-0.370767	-0.755783
CBG24468	Y60A3A.14	-0.426643	-0.514911
CBG20515	Y60A3A.8	-0.42704	-0.739711
CBG08769	Y61A9LA.3	-0.435087	-0.629557
CBG24575	Y61A9LA.8	-0.445607	-0.57974
CBG18745	Y64G10A.1	-0.369994	-0.721379
CBG18730	Y64G10A.7	-0.488444	-0.50806
CBG13812	Y65A5A.2	-0.355399	-0.515306
CBG05143	Y65B4A.2	-0.459603	-0.51075
CBG05145	Y65B4A.6	-0.409096	-0.623382
CBG04018	Y65B4A.6	-0.278667	-0.623382
CBG18542	Y65B4A.8	-0.441811	-0.740926
CBG22667	Y65B4BL.3	-0.395173	-0.529596
CBG05109	Y65B4BL.5	-0.495975	-0.739967
CBG05108	Y65B4BL.7	-0.406293	-0.622321
CBG05107	Y65B4BL.7	-0.40367	-0.622321
CBG05120	Y65B4BR.2	-0.440589	-0.755394
CBG05116	Y65B4BR.3	-0.435246	-0.637943
CBG05115	Y65B4BR.4	-0.387695	-0.644734
CBG13497	Y66H1A.2	-0.330909	-0.525026
CBG15217	Y67D2.1	-0.481425	-0.707248
CBG15218	Y67D2.2	-0.298031	-0.592764
CBG22523	Y69A2AL.2	-0.379694	-0.757787
CBG13878	Y69A2AR.2	-0.460343	-0.624099
CBG13880	Y69A2AR.30	-0.454919	-0.556104
CBG13883	Y69A2AR.4	-0.478097	-0.521482
CBG13882	Y69A2AR.5	-0.447734	-0.537735
CBG10566	Y69A2AR.6	-0.386676	-0.814004
CBG20713	Y69H2.10	-0.318122	-0.618939
CBG15823	Y6B3B.11	-0.360228	-0.502472
CBG04978	Y70C5B.2	-0.357485	-0.54909
CBG03663	Y71A12B.17	-0.37318	-0.798503
CBG11130	Y71A12B.17	-0.359214	-0.798503
CBG00506	Y71A12B.17	-0.3346	-0.798503
CBG00508	Y71A12B.17	-0.21407	-0.798503
CBG11728	Y71D11A.3	-0.427214	-0.523003
CBG04220	Y71F9AL.1	-0.437556	-0.815808
CBG04230	Y71F9AL.10	-0.355138	-0.637613
CBG04229	Y71F9AL.12	-0.323043	-0.603494
CBG04224	Y71F9AL.16	-0.293342	-0.561724
CBG04223	Y71F9AL.17	-0.269909	-0.611547
CBG04221	Y71F9AL.18	-0.361245	-0.791168
CBG04215	Y71F9AM.4	-0.349603	-0.522352
CBG04218	Y71F9AM.5	-0.287159	-0.784206
CBG04211	Y71F9AR.1	-0.363332	-0.585598
CBG04186	Y71F9AR.3	-0.431622	-0.60756
CBG04185	Y71F9AR.3	-0.332232	-0.60756
CBG04122	Y71F9B.10	-0.349755	-0.611353
CBG04123	Y71F9B.13	-0.403896	-0.510198
CBG25256	Y71F9B.15	-0.289584	-0.505751
CBG04116	Y71F9B.2	-0.244364	-0.834885
CBG04115	Y71F9B.3	-0.383346	-0.733187
CBG04112	Y71F9B.5	-0.353975	-0.64825
CBG04113	Y71F9B.6	-0.262598	-0.630643
CBG04117	Y71F9B.8	-0.400645	-0.522448
CBG13873	Y71G10AL.1	-0.487292	-0.667438
CBG13872	Y71G10AR.4	-0.468651	-0.770902
CBG22128	Y71G12A.2	-0.420954	-0.715748
CBG22218	Y71G12A.3	-0.353901	-0.579032
CBG22222	Y71G12A.4	-0.391217	-0.783986
CBG22204	Y71G12B.1	-0.351682	-0.745029
CBG22170	Y71G12B.10	-0.335864	-0.726556
CBG22153	Y71G12B.11	-0.460451	-0.535368
CBG22151	Y71G12B.13	-0.405825	-0.692461
CBG22137	Y71G12B.20	-0.392677	-0.615558
CBG22144	Y71G12B.22	-0.475147	-0.63616
CBG22171	Y71G12B.24	-0.457591	-0.623458
CBG22168	Y71G12B.25	-0.339829	-0.674978
CBG18710	Y71G12B.30	-0.43919	-0.563883
CBG22199	Y71G12B.4	-0.444719	-0.575527
CBG22166	Y71G12B.8	-0.406549	-0.543627
CBG00490	Y71H2AM.2	-0.388953	-0.504615
CBG00486	Y71H2AR.3	-0.31373	-0.500397
CBG18437	Y73B3A.16	-0.387463	-0.500441
CBG22164	Y73E7A.1	-0.370699	-0.537709
CBG22158	Y73E7A.2	-0.379192	-0.50173
CBG22265	Y73E7A.3	-0.324722	-0.514996
CBG22165	Y73E7A.7	-0.400627	-0.752671
CBG22161	Y73E7A.9	-0.120893	-0.612783
CBG13726	Y73F8A.11	-0.385081	-0.541191
CBG13722	Y73F8A.21	-0.458475	-0.519852
CBG13719	Y73F8A.24	-0.440488	-0.911603
CBG13718	Y73F8A.25	-0.470818	-0.659112
CBG03991	Y74C10AR.1	-0.43834	-0.802079
CBG03989	Y74C10AR.3	-0.333458	-0.646109
CBG23048	Y75B8A.16	-0.379256	-0.560974
CBG03593	Y75B8A.22	-0.428006	-0.68736
CBG15993	Y75B8A.26	-0.410667	-0.535491
CBG01916	Y75B8A.26	-0.373753	-0.535491
CBG23016	Y75B8A.7	-0.389759	-0.51291
CBG23017	Y75B8A.8	-0.497755	-0.546464
CBG21197	Y76A2A.2	-0.464985	-0.612241
CBG15309	Y76A2B.1	-0.481635	-0.708431
CBG15310	Y76A2B.2	-0.362761	-0.608407
CBG13890	Y77E11A.1	-0.429976	-0.753247
CBG15134	Y77E11A.11	-0.437115	-0.746175
CBG13889	Y77E11A.13	-0.468975	-0.525425
CBG20320	Y80D3A.1	-0.387194	-0.513941
CBG27386	Y80D3A.2	-0.404956	-0.785032
CBG23818	Y80D3A.2	-0.322385	-0.785032
CBG23820	Y80D3A.2	-0.322385	-0.785032
CBG23699	Y80D3A.4	-0.406748	-0.750773
CBG20323	Y80D3A.5	-0.386913	-0.540566
CBG11723	Y82E9BR.19	-0.398814	-0.623656
CBG11709	Y82E9BR.22	-0.329995	-0.690093
CBG08033	Y87G2A.2	-0.40048	-0.545874
CBG08035	Y87G2A.5	-0.399241	-0.738759
CBG19773	Y8G1A.1	-0.335328	-0.834825
CBG22259	Y92H12A.1	-0.452065	-0.608975
CBG22280	Y92H12A.4	-0.438697	-0.763269
CBG22281	Y92H12A.5	-0.240466	-0.682493
CBG15100	Y92H12BL.4	-0.382315	-0.636084
CBG15102	Y92H12BL.5	-0.466507	-0.57684
CBG22303	Y92H12BL.5	-0.466507	-0.57684
CBG15095	Y92H12BR.3	-0.437777	-0.686677
CBG22286	Y92H12BR.3	-0.326551	-0.686677
CBG15098	Y92H12BR.7	-0.42437	-0.651454
CBG15094	Y92H12BR.8	-0.363664	-0.747319
CBG22298	Y92H12BR.8	-0.34917	-0.747319
CBG13908	Y94H6A.11	-0.490725	-0.695761
CBG13909	Y94H6A.5	-0.460302	-0.643122
CBG13913	Y94H6A.8	-0.391553	-0.602651
CBG05121	Y95B8A.1	-0.410684	-0.55715
CBG18547	Y95B8A.11	-0.370608	-0.50532
CBG18550	Y95B8A.8	-0.45823	-0.707137
CBG05139	ZC123.3	-0.394731	-0.579757
CBG11426	ZC15.2	-0.417768	-0.505521
CBG08307	ZC416.8	-0.442473	-0.537178
CBG08305	ZC416.8	-0.4321	-0.537178
CBG24662	ZC47.14	-0.278796	-0.610601
CBG15739	ZC482.5	-0.461542	-0.596272
CBG15777	ZK1010.9	-0.429241	-0.769028
CBG07921	ZK256.1	-0.482741	-0.642746
CBG16967	ZK262.6	-0.393604	-0.617505
CBG16966	ZK262.6	-0.349007	-0.617505
CBG16965	ZK262.6	-0.339488	-0.617505
CBG16963	ZK262.6	-0.333863	-0.617505
CBG19621	ZK355.2	-0.497744	-0.588178
CBG00364	ZK550.2	-0.33966	-0.544296
CBG01365	ZK6.6	-0.349587	-0.652254
CBG19630	ZK697.4	-0.276137	-0.660475
CBG06491	C17E7.3	-0.505405	-0.77951
CBG20818	F01D5.3	-0.552922	-0.522508
CBG08401	F55A8.2	-0.552836	-0.620868
CBG01766	K09B11.10	-0.531079	-0.543745
CBG06559	T03D8.5	-0.532255	-0.529283
CBG20674	W02B8.1	-0.502356	-0.541607
CBG06432	Y108G3AL.7	-0.534861	-0.587523
CBG20837	Y39G8C.1	-0.506778	-0.550561
CBG08395	Y41D4A.6	-0.659086	-0.618498
CBG01125	Y45G12C.7	-0.59168	-0.855907
CBG13188	Y47D3A.6	-0.744416	-0.549456
CBG18272	Y52D3.1	-0.582562	-0.639325
CBG20666	Y54G11A.3	-0.577349	-0.708209
CBG06944	Y55F3BR.2	-0.57911	-0.512324
CBG13278	Y66D12A.23	-0.522794	-0.537465
CBG09841	Y71H2AM.7	-0.589567	-0.618188
CBG06422	Y75B7AL.2	-0.584578	-0.629993
CBG12167	ZK6.10	-0.546278	-0.516424
CBG17890	C02E11.1	-0.406249	-0.538171
CBG23884	C16A11.10	-0.311479	-0.555403
CBG23881	C16A11.10	-0.304354	-0.555403
CBG17242	C16A11.10	-0.293121	-0.555403
CBG13297	C18D11.2	-0.337925	-0.589695
CBG13299	C18D11.4	-0.266627	-0.681802
CBG06646	C24B9.3	-0.425399	-0.552493
CBG06647	C24B9.4	-0.353488	-0.625242
CBG09792	C34C12.5	-0.472481	-0.514841
CBG06572	C38C3.5	-0.413436	-0.550724
CBG01829	C39E9.11	-0.233426	-0.508365
CBG01076	C39F7.5	-0.463427	-0.628941
CBG16740	C41D11.7	-0.389683	-0.599831
CBG12181	C43E11.3	-0.443091	-0.530184
CBG18293	C44B9.4	-0.2433	-0.529263
CBG06726	C46E1.2	-0.410605	-0.63119
CBG09775	C46F11.4	-0.300111	-0.527713
CBG03143	C47D12.7	-0.370597	-0.600844
CBG01813	C48D1.2	-0.279778	-0.521638
CBG09859	C56G7.3	-0.413904	-0.51203
CBG12024	D1037.1	-0.363727	-0.513676
CBG12023	D1037.5	-0.274681	-0.510896
CBG02853	D1043.1	-0.311813	-0.506775
CBG18383	D2045.9	-0.393285	-0.510196
CBG06431	DC2.3	-0.447926	-0.683793
CBG12063	E01A2.5	-0.398307	-0.524107
CBG20778	E01G4.4	-0.399365	-0.524964
CBG20682	F08G2.8	-0.464611	-0.876576
CBG01682	F09E8.3	-0.344763	-0.598196
CBG12598	F10C5.1	-0.287099	-0.537872
CBG03891	F12B6.1	-0.378092	-0.527202
CBG03133	F13D12.8	-0.395195	-0.512339
CBG02816	F15D4.1	-0.278051	-0.628973
CBG02822	F15D4.4	-0.34534	-0.557497
CBG06613	F16B4.10	-0.281943	-0.511089
CBG02800	F18A11.2	-0.375721	-0.529139
CBG03983	F23C8.5	-0.189894	-0.662123
CBG12879	F23C8.7	-0.420486	-0.618842
CBG02784	F29C12.3	-0.295337	-0.560956
CBG02786	F29C12.3	-0.230071	-0.560956
CBG02783	F29C12.4	-0.292733	-0.846017
CBG02809	F32A11.2	-0.236543	-0.596342
CBG12107	F33E11.3	-0.483092	-0.588077
CBG01069	F33E11.6	-0.392012	-0.511521
CBG04275	F35C5.5	-0.4118	-0.587404
CBG25517	F35C5.8	-0.438181	-0.562593
CBG22000	F36D1.8	-0.322634	-0.703574
CBG17863	F36D1.8	-0.223383	-0.703574
CBG12157	F36F12.1	-0.399495	-0.631457
CBG06300	F36F12.2	-0.34908	-0.690282
CBG06302	F36F12.2	-0.328051	-0.690282
CBG23186	F36F12.2	-0.254783	-0.690282
CBG01167	F37B4.4	-0.394149	-0.503456
CBG01168	F37B4.4	-0.355321	-0.503456
CBG02997	F44F4.1	-0.338931	-0.627815
CBG20774	F45H10.1	-0.328619	-0.552288
CBG20772	F45H10.3	-0.220583	-0.676906
CBG09855	F45H7.2	-0.393333	-0.58797
CBG09857	F45H7.6	-0.418931	-0.553414
CBG23995	F49E11.3	-0.385195	-0.746502
CBG19359	F52D1.1	-0.266255	-0.536797
CBG01596	F52D2.9	-0.386463	-0.554516
CBG01755	F52G2.2	-0.345056	-0.650891
CBG02073	F54G2.1	-0.431311	-0.537907
CBG01673	F55F10.1	-0.321061	-0.657233
CBG03901	F56A6.2	-0.33377	-0.656672
CBG06442	F56E10.2	-0.395834	-0.786725
CBG06440	F56E10.2	-0.373158	-0.786725
CBG02756	F58G1.2	-0.277159	-0.63354
CBG02761	F58G1.6	-0.324931	-0.523757
CBG06651	F59B1.6	-0.355211	-0.590824
CBG06652	F59B1.6	-0.173884	-0.590824
CBG14615	H24K24.2	-0.299029	-0.587648
CBG17893	H24K24.4	-0.299065	-0.549423
CBG06336	H24O09.1	-0.380126	-0.879485
CBG06606	H24O09.1	-0.246632	-0.879485
CBG01799	JC8.10	-0.274427	-0.504907
CBG01804	JC8.5	-0.22825	-0.550244
CBG09868	K01A11.1	-0.460151	-0.52365
CBG02099	K02E10.4	-0.424639	-0.590117
CBG17433	K02E2.2	-0.411821	-0.510892
CBG08406	K07A9.2	-0.407735	-0.584963
CBG18261	K08E3.8	-0.274877	-0.845081
CBG01770	K09B11.1	-0.217531	-0.594773
CBG01769	K09B11.2	-0.382375	-0.51503
CBG20846	K09E4.4	-0.382728	-0.544486
CBG17876	K10C9.7	-0.288464	-0.551426
CBG18395	M03C11.1	-0.348755	-0.502451
CBG01665	R02D3.2	-0.169633	-0.525579
CBG20690	R06B9.4	-0.270271	-0.569707
CBG17887	R09A1.1	-0.44376	-0.698201
CBG17888	R09A1.2	-0.347473	-0.513383
CBG17941	R09A1.2	-0.347473	-0.513383
CBG06421	R12A1.2	-0.3891	-0.544621
CBG06419	R12A1.3	-0.338791	-0.558
CBG06418	R12A1.4	-0.317186	-0.598991
CBG17895	T02B11.6	-0.484456	-0.56387
CBG02059	T02C5.5	-0.454852	-0.518845
CBG05858	T02C5.5	-0.374884	-0.518845
CBG13049	T03D3.1	-0.409557	-0.529448
CBG04537	T03D8.5	-0.373479	-0.529283
CBG09580	T03D8.5	-0.369608	-0.529283
CBG03898	T03D8.5	-0.359352	-0.529283
CBG23466	T03D8.5	-0.359196	-0.529283
CBG01558	T03F1.10	-0.293653	-0.554794
CBG02946	T06D8.2	-0.393063	-0.620311
CBG12139	T08B1.2	-0.414211	-0.718553
CBG12133	T08B1.6	-0.425774	-0.559801
CBG26973	T11F1.2	-0.274511	-0.539047
CBG11993	T12F5.5	-0.339752	-0.550637
CBG03012	T19E10.1	-0.323932	-0.542384
CBG18364	T21C12.1	-0.439067	-0.500724
CBG01096	T21H3.5	-0.387637	-0.512218
CBG01736	T22B11.1	-0.371277	-0.530013
CBG01737	T22B11.5	-0.307729	-0.636215
CBG03373	T23E1.1	-0.35401	-0.745808
CBG03375	T23E1.3	-0.249943	-0.641122
CBG19900	T23G4.4	-0.409783	-0.510068
CBG19902	T23G4.4	-0.333545	-0.510068
CBG18255	T25C8.1	-0.424087	-0.791126
CBG01230	T27B7.7	-0.361585	-0.589403
CBG06664	T27C4.4	-0.328014	-0.55192
CBG25853	T27C4.4	-0.15416	-0.55192
CBG13201	T28D6.6	-0.430673	-0.640436
CBG11986	T28F2.5	-0.32836	-0.787654
CBG20836	W01G7.5	-0.252	-0.814759
CBG02889	W02B12.4	-0.34299	-0.601534
CBG20749	W02B8.6	-0.492458	-0.629146
CBG20752	W02B8.6	-0.412758	-0.629146
CBG02776	W02B8.6	-0.336827	-0.629146
CBG20751	W02B8.6	-0.286328	-0.629146
CBG06639	W02G9.1	-0.21798	-0.525841
CBG06641	W02G9.3	-0.366196	-0.583109
CBG06637	W02H5.8	-0.255978	-0.54186
CBG20859	W03C9.8	-0.338528	-0.591447
CBG06439	W03F9.5	-0.413613	-0.684361
CBG01615	W03G1.6	-0.289137	-0.636604
CBG18270	W05B2.2	-0.373517	-0.558648
CBG19393	W05G11.4	-0.39224	-0.559165
CBG20743	W07G1.5	-0.214816	-0.620113
CBG18324	W09D10.5	-0.326489	-0.530851
CBG18379	W09D10.5	-0.166298	-0.530851
CBG13181	W09D6.5	-0.306408	-0.625858
CBG02815	W09H1.6	-0.358966	-0.643669
CBG01132	Y105C5B.1	-0.287183	-0.511905
CBG04303	Y105C5B.11	-0.395979	-0.619205
CBG04307	Y105C5B.11	-0.128694	-0.619205
CBG01676	Y108F1.3	-0.312486	-0.597167
CBG06434	Y108G3AL.1	-0.366021	-0.899732
CBG06437	Y108G3AL.2	-0.399288	-0.561096
CBG03294	Y110A2AL.8	-0.377112	-0.560425
CBG02314	Y18H1A.1	-0.260896	-0.545443
CBG01851	Y18H1A.10	-0.358326	-0.650136
CBG17309	Y18H1A.8	-0.347108	-0.602671
CBG02187	Y18H1A.8	-0.331126	-0.602671
CBG02186	Y18H1A.8	-0.291981	-0.602671
CBG01115	Y19D10A.11	-0.4963	-0.501336
CBG01116	Y19D10A.12	-0.418869	-0.53026
CBG01126	Y19D10A.15	-0.429109	-0.527964
CBG01117	Y19D10A.5	-0.364405	-0.540353
CBG06705	Y20F4.4	-0.253224	-0.67233
CBG23216	Y37D8A.9	-0.344211	-0.728501
CBG17113	Y37D8A.9	-0.328507	-0.728501
CBG01664	Y38C1AA.1	-0.390929	-0.560298
CBG01662	Y38C1AA.2	-0.299224	-0.523326
CBG01661	Y38C1AA.3	-0.300056	-0.755118
CBG08411	Y38C1BA.2	-0.403414	-0.511709
CBG13010	Y38E10A.10	-0.382866	-0.513953
CBG02801	Y38F1A.10	-0.354807	-0.718556
CBG02802	Y38F1A.10	-0.319132	-0.718556
CBG18290	Y39A1A.2	-0.407372	-0.643614
CBG18353	Y39A1A.3	-0.359134	-0.590851
CBG18299	Y39A1C.2	-0.280848	-0.578563
CBG02274	Y39E4B.5	-0.302476	-0.735026
CBG03876	Y39G10AL.3	-0.3159	-0.616955
CBG03877	Y39G10AR.11	-0.234298	-0.698083
CBG03979	Y39G10AR.18	-0.299636	-0.708383
CBG03980	Y39G10AR.18	-0.288413	-0.708383
CBG03981	Y39G10AR.2	-0.255521	-0.844486
CBG03884	Y39G10AR.8	-0.290653	-0.749837
CBG20838	Y39G8C.4	-0.42894	-0.810942
CBG06669	Y39H10A.6	-0.416782	-0.62565
CBG12152	Y40B10A.8	-0.374339	-0.602782
CBG08396	Y41D4A.4	-0.285383	-0.540687
CBG08394	Y41D4A.5	-0.28012	-0.645548
CBG08397	Y41D4A.7	-0.389005	-0.629014
CBG14449	Y43F4B.3	-0.49537	-0.656361
CBG01759	Y45F10A.4	-0.38668	-0.604679
CBG01761	Y45F10A.6	-0.372619	-0.636599
CBG01762	Y45F10A.7	-0.321827	-0.547337
CBG03351	Y45F10B.6	-0.458552	-0.591252
CBG21890	Y45F10C.1	-0.280957	-0.590381
CBG06644	Y45G12B.2	-0.249111	-0.726521
CBG06643	Y45G12B.3	-0.32383	-0.563942
CBG06920	Y45G5AM.3	-0.362031	-0.691991
CBG06921	Y45G5AM.3	-0.324827	-0.691991
CBG02156	Y46C8AR.3	-0.360663	-0.573535
CBG20655	Y46E12BL.2	-0.290289	-0.730771
CBG06530	Y46H3C.3	-0.456954	-0.689511
CBG06531	Y46H3C.3	-0.331846	-0.689511
CBG06536	Y46H3C.3	-0.287219	-0.689511
CBG06537	Y46H3C.3	-0.243711	-0.689511
CBG13210	Y47D3A.21	-0.282465	-0.543136
CBG13205	Y47D3A.25	-0.402454	-0.695466
CBG13206	Y47D3A.26	-0.371432	-0.709193
CBG13203	Y47D3A.28	-0.422283	-0.597939
CBG13184	Y47D3A.29	-0.291897	-0.714939
CBG13185	Y47D3A.4	-0.265826	-0.653368
CBG13286	Y47D3B.5	-0.424151	-0.57162
CBG11965	Y47G6A.1	-0.296388	-0.657883
CBG11964	Y47G6A.2	-0.22886	-0.803052
CBG14030	Y47H10A.5	-0.341411	-0.548043
CBG13167	Y48A6B.11	-0.458951	-0.772571
CBG13166	Y48A6B.11	-0.303361	-0.772571
CBG19424	Y48A6C.3	-0.428758	-0.68393
CBG20662	Y48B6A.11	-0.227114	-0.606971
CBG20661	Y48B6A.13	-0.202673	-0.661771
CBG20794	Y48C3A.10	-0.288273	-0.747842
CBG20790	Y48C3A.12	-0.33302	-0.645183
CBG20787	Y48C3A.12	-0.252077	-0.645183
CBG20786	Y48C3A.14	-0.355831	-0.645586
CBG20797	Y48C3A.7	-0.399363	-0.738401
CBG20734	Y48E1A.1	-0.383505	-0.624737
CBG20671	Y48E1B.10	-0.1152	-0.527402
CBG20763	Y48E1B.14	-0.352535	-0.640132
CBG20759	Y48E1B.3	-0.360816	-0.53063
CBG20760	Y48E1B.3	-0.287348	-0.53063
CBG20757	Y48E1B.7	-0.378351	-0.603154
CBG20780	Y48E1C.4	-0.236113	-0.517605
CBG12360	Y48G10A.2	-0.36731	-0.713772
CBG03912	Y48G1C.4	-0.381506	-0.665907
CBG01136	Y48G1C.5	-0.348181	-0.579905
CBG01084	Y50D4A.1	-0.463816	-0.624217
CBG01087	Y50D4A.4	-0.405205	-0.656325
CBG17885	Y50D4C.1	-0.39395	-0.526299
CBG17880	Y50D4C.3	-0.427504	-0.680506
CBG17882	Y50D4C.4	-0.457101	-0.579842
CBG17886	Y50D4C.5	-0.386143	-0.573442
CBG20678	Y51H1A.4	-0.334541	-0.500085
CBG20676	Y51H1A.6	-0.329071	-0.850852
CBG03145	Y53F4B.22	-0.245553	-0.692722
CBG09851	Y54F10AM.10	-0.353826	-0.600077
CBG20665	Y54G11A.1	-0.354077	-0.679381
CBG20807	Y54G11A.13	-0.401996	-0.727486
CBG20805	Y54G11A.13	-0.248942	-0.727486
CBG09942	Y54G11A.14	-0.319987	-0.567892
CBG03357	Y54G2A.26	-0.401532	-0.564834
CBG03362	Y54G2A.29	-0.32432	-0.5493
CBG20732	Y54G9A.4	-0.360571	-0.522785
CBG20696	Y54G9A.6	-0.253184	-0.806327
CBG20697	Y54G9A.6	-0.253184	-0.806327
CBG08426	Y55F3AM.15	-0.495276	-0.619049
CBG14442	Y55F3AM.6	-0.305106	-0.778427
CBG06945	Y55F3BR.2	-0.38959	-0.512324
CBG13301	Y56A3A.1	-0.38022	-0.668469
CBG13311	Y56A3A.16	-0.234489	-0.633996
CBG13303	Y56A3A.2	-0.271804	-0.659762
CBG13317	Y56A3A.22	-0.255507	-0.587209
CBG13322	Y56A3A.22	-0.255507	-0.587209
CBG13326	Y56A3A.27	-0.334019	-0.577378
CBG13329	Y56A3A.31	-0.233154	-0.760878
CBG13330	Y56A3A.32	-0.331577	-0.598134
CBG13304	Y56A3A.4	-0.276439	-0.728756
CBG13325	Y56A3A.7	-0.369685	-0.585673
CBG14039	Y57A10A.31	-0.367933	-0.530723
CBG27680	Y57A10A.31	-0.115208	-0.530723
CBG01773	Y62E10A.15	-0.326816	-0.520404
CBG01772	Y62E10A.19	-0.251797	-0.713614
CBG01786	Y62E10A.4	-0.390568	-0.510216
CBG29108	Y62F5A.1	-0.34383	-0.812195
CBG13254	Y66A7A.4	-0.313335	-0.51537
CBG13269	Y66D12A.15	-0.281705	-0.508951
CBG25866	Y66D12A.16	-0.223878	-0.886394
CBG13271	Y66D12A.17	-0.365421	-0.727732
CBG13273	Y66D12A.20	-0.270048	-0.62349
CBG13276	Y66D12A.24	-0.324133	-0.640967
CBG13256	Y66D12A.3	-0.293938	-0.553871
CBG13257	Y66D12A.5	-0.318705	-0.680248
CBG13258	Y66D12A.7	-0.128867	-0.5474
CBG13259	Y66D12A.8	-0.2355	-0.586988
CBG13260	Y66D12A.9	-0.1908	-0.591802
CBG03378	Y67D8B.2	-0.45341	-0.62592
CBG03376	Y67D8C.3	-0.351514	-0.522457
CBG03363	Y67D8C.5	-0.244404	-0.613489
CBG03365	Y67D8C.8	-0.426902	-0.60967
CBG01798	Y67H2A.1	-0.333388	-0.635394
CBG01797	Y67H2A.10	-0.294209	-0.598556
CBG01796	Y67H2A.2	-0.43531	-0.528309
CBG01793	Y67H2A.6	-0.295167	-0.51333
CBG01792	Y67H2A.7	-0.327047	-0.618712
CBG11238	Y6B3A.1	-0.476629	-0.610919
CBG23794	Y70G10A.3	-0.44637	-0.544167
CBG02852	Y71F9AL.2	-0.378788	-0.691016
CBG17743	Y71F9AL.4	-0.382453	-0.598183
CBG12791	Y71F9B.15	-0.36187	-0.505751
CBG09836	Y71H2AL.1	-0.371001	-0.513587
CBG09839	Y71H2AM.10	-0.334596	-0.506519
CBG09840	Y71H2AM.11	-0.322974	-0.581525
CBG25881	Y71H2AM.12	-0.392855	-0.531358
CBG09816	Y71H2AM.19	-0.307009	-0.55587
CBG09818	Y71H2AM.20	-0.37027	-0.565966
CBG14123	Y71H2AM.22	-0.404497	-0.502268
CBG09837	Y71H2AM.9	-0.2903	-0.597185
CBG09827	Y71H2B.3	-0.232022	-0.539714
CBG09825	Y71H2B.5	-0.340222	-0.646329
CBG03916	Y74C9A.2	-0.356579	-0.533395
CBG03915	Y74C9A.5	-0.34851	-0.66025
CBG06428	Y75B7AL.4	-0.396257	-0.72161
CBG08354	Y75B8A.26	-0.255932	-0.535491
CBG18173	Y79H2A.11	-0.336489	-0.634243
CBG18174	Y79H2A.3	-0.37221	-0.758955
CBG18175	Y79H2A.3	-0.290617	-0.758955
CBG20685	ZK131.11	-0.356764	-0.532853
CBG01699	ZK180.1	-0.411581	-0.803887
CBG06550	ZK697.2	-0.439199	-0.578592
CBG24373	ZK896.9	-0.253633	-0.502553
CBG22310	ZK897.1	-0.409783	-0.567904
CBG02750	ZK930.1	-0.371866	-0.587282
CBG23928	ZK973.11	-0.298312	-0.538579
CBG03673	B0286.2	-0.567478	-0.399642
CBG03675	B0286.3	-0.512813	-0.40771
CBG15291	B0412.3	-0.611043	-0.497419
CBG15142	BE0003N10.1	-0.59464	-0.379823
CBG20396	C01A2.3	-0.594754	-0.289304
CBG03650	C01F1.4	-0.515943	-0.392091
CBG22441	C02A12.8	-0.560562	-0.29656
CBG19452	C02A12.8	-0.543843	-0.29656
CBG20134	C02C6.1	-0.590115	-0.287534
CBG20206	C03C10.1	-0.526461	-0.299661
CBG20214	C03C10.4	-0.54221	-0.232177
CBG21050	C04C3.2	-0.502581	-0.437347
CBG21052	C04C3.5	-0.51137	-0.425771
CBG10399	C04C3.7	-0.546883	-0.29615
CBG08078	C09E10.2	-0.64214	-0.377774
CBG07071	C09E8.1	-0.528581	-0.463862
CBG22636	C09G12.11	-0.595308	-0.440177
CBG07246	C11H1.4	-0.558135	-0.484997
CBG00983	C13B4.1	-0.519223	-0.417979
CBG24105	C14C6.1	-0.526066	-0.343974
CBG21952	C16A11.2	-0.534375	-0.476798
CBG21953	C16A11.5	-0.544855	-0.375968
CBG20172	C16C10.12	-0.600288	-0.371247
CBG00460	C29F9.7	-0.509417	-0.340122
CBG16406	C30F2.1	-0.63191	-0.270408
CBG26954	C31B8.16	-0.692513	-0.410039
CBG08473	C35E7.6	-0.633452	-0.296365
CBG08475	C35E7.7	-0.504017	-0.290935
CBG03634	C36E8.1	-0.521002	-0.361944
CBG11062	C38C6.3	-0.534249	-0.280354
CBG22121	C39B5.2	-0.532746	-0.376291
CBG13961	C44B12.1	-0.574384	-0.432724
CBG13977	C44C8.6	-0.537461	-0.355361
CBG07558	C44H4.5	-0.646852	-0.336833
CBG08845	C45H4.17	-0.530493	-0.374717
CBG07934	C47B2.7	-0.507948	-0.407744
CBG04861	C49G7.1	-0.570784	-0.414068
CBG15941	C53C11.3	-0.527783	-0.339814
CBG22071	C53D5.4	-0.585178	-0.366701
CBG22061	C53D5.5	-0.519677	-0.408855
CBG04363	C54C8.11	-0.570662	-0.374348
CBG22109	C54G6.2	-0.505165	-0.425257
CBG07924	CC4.2	-0.510863	-0.409652
CBG07923	CC4.3	-0.678751	-0.325245
CBG10596	E02H4.7	-0.51578	-0.299621
CBG11683	E02H9.9	-0.557145	-0.426652
CBG20202	E03A3.6	-0.544412	-0.349497
CBG19579	F08D12.7	-0.521577	-0.413346
CBG19728	F11C3.2	-0.506679	-0.305284
CBG00442	F11E6.10	-0.559597	-0.28715
CBG19502	F12E12.5	-0.510429	-0.267507
CBG20977	F15A4.4	-0.580685	-0.307627
CBG15800	F15D3.6	-0.583202	-0.494444
CBG08768	F16B4.11	-0.507579	-0.29702
CBG10576	F18F11.5	-0.544102	-0.295848
CBG19625	F23F1.6	-0.504752	-0.235361
CBG07002	F23F1.9	-0.657856	-0.443684
CBG15173	F23H11.4	-0.592353	-0.43028
CBG05551	F25C8.4	-0.518696	-0.404236
CBG07231	F26D2.16	-0.539894	-0.360542
CBG21821	F31A9.3	-0.547038	-0.417532
CBG19737	F31C3.3	-0.530022	-0.398131
CBG19739	F31C3.6	-0.552705	-0.46217
CBG21973	F31D5.3	-0.507373	-0.471626
CBG21976	F31D5.4	-0.51999	-0.380693
CBG23623	F32D1.11	-0.508947	-0.479862
CBG19734	F33H2.3	-0.503299	-0.201855
CBG19724	F33H2.6	-0.677513	-0.406496
CBG15976	F35B3.7	-0.534981	-0.342653
CBG18403	F35C5.2	-0.571878	-0.467064
CBG07140	F36D3.1	-0.514636	-0.380925
CBG10733	F37C4.6	-0.538967	-0.365077
CBG10734	F37C4.8	-0.556127	-0.316637
CBG25819	F37H8.2	-0.584127	-0.34048
CBG00848	F37H8.4	-0.568789	-0.340589
CBG22630	F38A1.10	-0.502208	-0.302326
CBG05574	F38A6.2	-0.556868	-0.488918
CBG19759	F39B2.4	-0.50824	-0.439047
CBG19763	F39B2.8	-0.508131	-0.481841
CBG08802	F39G3.7	-0.782749	-0.475945
CBG15727	F40G9.11	-0.505769	-0.433193
CBG15723	F40G9.17	-0.5006	-0.418693
CBG15725	F40G9.2	-0.611784	-0.471681
CBG17858	F42G2.4	-0.500781	-0.444045
CBG20149	F43C1.1	-0.591805	-0.441362
CBG21208	F45G2.7	-0.593999	-0.343963
CBG21207	F45G2.8	-0.573986	-0.275944
CBG05612	F46B3.3	-0.502651	-0.33862
CBG13631	F46F2.4	-0.507213	-0.297547
CBG10468	F48G7.13	-0.568171	-0.293953
CBG19520	F49H12.1	-0.597436	-0.340425
CBG08163	F52D1.2	-0.500421	-0.313938
CBG24284	F53A2.1	-0.625049	-0.321472
CBG05100	F53G12.5	-0.522616	-0.393143
CBG05099	F53G12.6	-0.520215	-0.357139
CBG18867	F53G12.8	-0.568959	-0.327376
CBG17813	F53H2.3	-0.53198	-0.38119
CBG00465	F54C4.1	-0.543608	-0.27331
CBG00462	F54C4.2	-0.543154	-0.375127
CBG08071	F55A4.5	-0.648556	-0.416696
CBG23910	F56B3.4	-0.558183	-0.456534
CBG23906	F56B3.7	-0.574681	-0.370075
CBG08044	F56G4.4	-0.674162	-0.326425
CBG08045	F56G4.6	-0.643779	-0.440266
CBG20415	F56G4.7	-0.527515	-0.403875
CBG23903	F58H7.2	-0.552579	-0.435655
CBG07639	H03G16.2	-0.516899	-0.297103
CBG18696	H04D03.2	-0.527778	-0.332384
CBG25828	H05C05.4	-0.524537	-0.230814
CBG22468	H06I04.2	-0.509738	-0.431119
CBG13506	H12I19.4	-0.824715	-0.369335
CBG15673	H14E04.2	-0.500673	-0.453963
CBG03667	H20J04.4	-0.548769	-0.426743
CBG13660	K02E7.6	-0.545379	-0.330044
CBG08785	K03B4.5	-0.58266	-0.426424
CBG18629	K03D3.4	-0.512938	-0.364506
CBG13560	K03H6.1	-0.543036	-0.410299
CBG23008	K04F1.15	-0.543321	-0.414372
CBG01385	K07C6.4	-0.51627	-0.254542
CBG07731	K09A9.4	-0.616967	-0.442865
CBG21268	K09C6.3	-0.536059	-0.294148
CBG18445	K10G6.4	-0.53707	-0.353527
CBG19712	K11B4.1	-0.692257	-0.410031
CBG22209	M01D7.5	-0.599332	-0.214684
CBG00321	M01G12.12	-0.533317	-0.438856
CBG04006	M01G12.12	-0.505048	-0.438856
CBG08830	R02F11.4	-0.584891	-0.423422
CBG21972	R03H10.1	-0.530536	-0.382772
CBG18749	R05A10.1	-0.732281	-0.448284
CBG20338	R05D7.1	-0.556535	-0.405453
CBG22088	R06A10.4	-0.559486	-0.49297
CBG11104	R06A4.8	-0.511096	-0.486748
CBG15139	R06B10.4	-0.513471	-0.391299
CBG12298	R10E4.2	-0.519472	-0.443778
CBG12304	R10E4.5	-0.550778	-0.489931
CBG16391	R11.3	-0.796844	-0.331557
CBG10465	R11G11.2	-0.539577	-0.296217
CBG20142	R13G10.2	-0.518303	-0.369466
CBG20194	T02C12.3	-0.518741	-0.367274
CBG17072	T03E6.3	-0.518955	-0.258621
CBG08115	T04G9.6	-0.548026	-0.334057
CBG19565	T05A8.4	-0.507755	-0.414093
CBG01269	T09H2.1	-0.599435	-0.282928
CBG21815	T10B5.6	-0.516807	-0.417624
CBG18613	T12B5.4	-0.606341	-0.262306
CBG01395	T12C9.1	-0.70081	-0.301074
CBG03688	T12C9.1	-0.582744	-0.301074
CBG15880	T13F3.1	-0.51378	-0.259294
CBG10659	T14C1.1	-0.746863	-0.423121
CBG15906	T19C9.8	-0.525723	-0.271458
CBG21860	T20D4.18	-0.526352	-0.281382
CBG17840	T20F7.1	-0.521796	-0.35532
CBG24077	T21B4.1	-0.613547	-0.384244
CBG21878	T21B4.8	-0.549739	-0.37476
CBG22547	T21D12.2	-0.560121	-0.322504
CBG22549	T21D12.4	-0.522366	-0.353295
CBG22529	T21D12.9	-0.503954	-0.371401
CBG11853	T21E12.4	-0.576453	-0.383393
CBG07868	T22F7.4	-0.51456	-0.275144
CBG01301	T24A6.4	-0.544011	-0.316845
CBG15177	T24C4.6	-0.552673	-0.394369
CBG15176	T24C4.7	-0.551923	-0.370745
CBG13668	T26C11.7	-0.501835	-0.386322
CBG20542	T26H2.9	-0.555767	-0.354061
CBG15319	T27E9.9	-0.634362	-0.454295
CBG17001	T28A11.16	-0.715816	-0.202313
CBG00380	T28F3.1	-0.563073	-0.324877
CBG13602	W02A11.2	-0.551843	-0.498977
CBG13410	W03B1.9	-0.505914	-0.480994
CBG04103	W03D8.8	-0.512357	-0.431262
CBG19769	W04A4.5	-0.621245	-0.405771
CBG13621	W04A8.6	-0.537088	-0.484119
CBG15661	W04B5.3	-0.562531	-0.402184
CBG05582	W07A8.2	-0.589947	-0.396282
CBG05578	W07A8.3	-0.56527	-0.374741
CBG05579	W07A8.5	-0.60007	-0.20658
CBG03637	W08F4.13	-0.502867	-0.280404
CBG21361	W09G10.3	-0.51401	-0.399871
CBG21360	W09G10.4	-0.581652	-0.397304
CBG13951	W09G12.10	-0.553486	-0.397414
CBG13946	Y104H12BR.1	-0.525796	-0.435769
CBG13748	Y105C5A.1	-0.555967	-0.37627
CBG22820	Y105C5B.17	-0.631435	-0.363135
CBG19803	Y105E8B.8	-0.51491	-0.453866
CBG19804	Y105E8B.9	-0.533306	-0.38842
CBG07226	Y110A2AL.10	-0.577822	-0.263444
CBG10308	Y110A2AL.10	-0.54137	-0.263444
CBG12936	Y113G7A.6	-0.676524	-0.39139
CBG00334	Y116A8C.9	-0.512338	-0.439428
CBG04840	Y119D3A.3	-0.516103	-0.332533
CBG22245	Y14H12B.2	-0.565833	-0.31102
CBG23808	Y17D7A.1	-0.553433	-0.450021
CBG07932	Y18D10A.7	-0.560056	-0.391986
CBG07980	Y18D10A.8	-0.539619	-0.452005
CBG05125	Y18H1A.13	-0.525007	-0.483834
CBG16956	Y18H1A.14	-0.611628	-0.350812
CBG05156	Y18H1A.15	-0.554546	-0.41754
CBG11703	Y22D7AL.9	-0.700559	-0.452891
CBG19548	Y27F2A.11	-0.548888	-0.312943
CBG11316	Y27F2A.6	-0.545656	-0.389054
CBG22034	Y34D9A.3	-0.504808	-0.461218
CBG22452	Y37A1A.3	-0.59495	-0.30204
CBG22463	Y37A1B.17	-0.525143	-0.386776
CBG08295	Y37E11AL.1	-0.56751	-0.394616
CBG08299	Y37E11AL.2	-0.509793	-0.346209
CBG08317	Y37E11AL.6	-0.585624	-0.430232
CBG08323	Y37E11AL.7	-0.535421	-0.354812
CBG26284	Y38C1AA.6	-0.586799	-0.318325
CBG16813	Y38F2AR.12	-0.508193	-0.469881
CBG16815	Y38F2AR.2	-0.539548	-0.361875
CBG20324	Y39B6A.27	-0.594428	-0.429754
CBG23810	Y39B6A.33	-0.538254	-0.343308
CBG08013	Y40B1B.8	-0.506342	-0.405105
CBG13578	Y41D4B.6	-0.558947	-0.379064
CBG13784	Y41E3.1	-0.581963	-0.434776
CBG13834	Y41E3.12	-0.516745	-0.422034
CBG03556	Y43F4A.1	-0.500756	-0.489498
CBG15770	Y43F4A.4	-0.509417	-0.0891552
CBG14965	Y44E3A.2	-0.505595	-0.444507
CBG01286	Y45G12C.3	-0.535467	-0.4212
CBG01448	Y45G5AL.1	-0.552411	-0.46745
CBG01442	Y45G5AM.7	-0.544329	-0.474898
CBG21853	Y46H3A.5	-0.526593	-0.434217
CBG22515	Y47H9C.6	-0.585642	-0.267682
CBG15841	Y47H9C.8	-0.653849	-0.358883
CBG21000	Y48B6A.4	-0.506002	-0.395099
CBG15108	Y48G9A.9	-0.51977	-0.416939
CBG11755	Y49E10.14	-0.50387	-0.444221
CBG00577	Y49F6A.1	-0.539276	-0.371692
CBG17764	Y49F6B.1	-0.522872	-0.384552
CBG21445	Y49F6C.4	-0.542161	-0.280133
CBG24099	Y49F6C.4	-0.525491	-0.280133
CBG10473	Y50D4A.3	-0.606223	-0.32528
CBG15713	Y50D7A.2	-0.5187	-0.453407
CBG07185	Y51H7C.6	-0.568394	-0.405168
CBG18699	Y53C10A.12	-0.550191	-0.464478
CBG18704	Y53C10A.6	-0.520852	-0.391129
CBG00485	Y53H1B.6	-0.563322	-0.352966
CBG04380	Y53H1C.2	-0.534332	-0.41822
CBG04253	Y54E2A.4	-0.551288	-0.418774
CBG07909	Y54E2A.4	-0.518312	-0.418774
CBG19706	Y54E5B.1	-0.513205	-0.400863
CBG15668	Y54F10AL.2	-0.586109	-0.495698
CBG15662	Y54F10BM.14	-0.503263	-0.393483
CBG15796	Y55B1BR.1	-0.515996	-0.430837
CBG13967	Y55F3AM.5	-0.546959	-0.497837
CBG13978	Y55F3BR.1	-0.535483	-0.42453
CBG20933	Y57A10A.10	-0.548661	-0.47881
CBG21034	Y57A10A.15	-0.643805	-0.468249
CBG20918	Y57A10A.16	-0.558337	-0.272169
CBG20959	Y57A10C.3	-0.526847	-0.379226
CBG21511	Y57G11C.13	-0.537861	-0.167596
CBG21501	Y57G11C.17	-0.559655	-0.411698
CBG21542	Y57G11C.32	-0.631863	-0.375635
CBG21543	Y57G11C.33	-0.540349	-0.363596
CBG21548	Y57G11C.37	-0.56524	-0.30921
CBG07119	Y57G7A.5	-0.536306	-0.352487
CBG25815	Y57G7A.6	-0.557453	-0.437282
CBG05597	Y59A8B.9	-0.516385	-0.499447
CBG12467	Y61B8A.4	-0.594015	-0.29327
CBG10183	Y63D3A.3	-0.679464	-0.336089
CBG21629	Y67A10A.7	-0.551883	-0.452711
CBG21625	Y67A10A.9	-0.646675	-0.36401
CBG11721	Y67D2.4	-0.563227	-0.392987
CBG03529	Y69H2.1	-0.528375	-0.407075
CBG03682	Y70G10A.2	-0.546277	-0.440945
CBG22229	Y71G12B.18	-0.516446	-0.319467
CBG22169	Y71G12B.9	-0.545331	-0.366306
CBG13713	Y73B3A.13	-0.528932	-0.35871
CBG23979	Y73B3A.15	-0.630567	-0.335313
CBG13716	Y73F8A.26	-0.592871	-0.49357
CBG23043	Y75B8A.12	-0.554914	-0.400521
CBG11783	Y75B8A.29	-0.544932	-0.463144
CBG11776	Y75B8A.30	-0.588698	-0.435246
CBG13919	Y77E11A.12	-0.534139	-0.479443
CBG13651	Y7A9A.1	-0.540062	-0.394408
CBG19782	Y87G2A.10	-0.536831	-0.375548
CBG08040	Y87G2A.15	-0.533044	-0.379375
CBG13912	Y94H6A.7	-0.543918	-0.441533
CBG08096	ZC13.3	-0.685241	-0.327461
CBG26993	ZC142.2	-0.535305	-0.359978
CBG15740	ZC482.1	-0.54216	-0.495365
CBG10378	ZC482.3	-0.634025	-0.413693
CBG15811	ZK1151.1	-0.621656	-0.473923
CBG08167	ZK1193.3	-0.550428	-0.366527
CBG08168	ZK1193.3	-0.521923	-0.366527
CBG08165	ZK1193.5	-0.624921	-0.354668
CBG19753	ZK270.1	-0.555948	-0.31851
CBG00366	ZK550.4	-0.551411	-0.332205
CBG16970	ZK678.4	-0.624964	-0.392141
CBG18798	ZK849.2	-0.509323	-0.44058
CBG07041	2L52.1	-0.328969	-0.328309
CBG00430	4R79.1	-0.324728	-0.33026
CBG00431	4R79.2	-0.285939	-0.305091
CBG07144	AC8.10	-0.242872	-0.352952
CBG07969	B0019.1	-0.439306	-0.420612
CBG20133	B0019.2	-0.374583	-0.383339
CBG08333	B0212.1	-0.43352	-0.331429
CBG08334	B0212.1	-0.411987	-0.331429
CBG15016	B0212.2	-0.409646	-0.408322
CBG15022	B0212.5	-0.378554	-0.380013
CBG01367	B0213.17	-0.232894	-0.181022
CBG01274	B0213.17	-0.1971	-0.181022
CBG01277	B0213.17	-0.170979	-0.181022
CBG25141	B0213.17	-0.154851	-0.181022
CBG01275	B0213.2	-0.155865	-0.199351
CBG01273	B0213.7	-0.342251	-0.346139
CBG05588	B0250.1	-0.306714	-0.309788
CBG05587	B0250.2	-0.37983	-0.347102
CBG05595	B0250.5	-0.173679	-0.394033
CBG05589	B0250.9	-0.432515	-0.439711
CBG00480	B0285.9	-0.332733	-0.420179
CBG03677	B0286.1	-0.424988	-0.360609
CBG03676	B0286.4	-0.387217	-0.380109
CBG03678	B0286.5	-0.423718	-0.364812
CBG03674	B0286.6	-0.367703	-0.453118
CBG15949	B0302.1	-0.410149	-0.348383
CBG15950	B0302.1	-0.290449	-0.348383
CBG16016	B0302.1	-0.28153	-0.348383
CBG15948	B0302.5	-0.333158	-0.266941
CBG13468	B0304.2	-0.472643	-0.236265
CBG13471	B0304.3	-0.403702	-0.363569
CBG13469	B0304.4	-0.335	-0.209723
CBG13479	B0304.5	-0.378181	-0.33387
CBG13454	B0304.6	-0.39519	-0.364093
CBG13457	B0304.7	-0.436147	-0.329255
CBG13456	B0304.7	-0.432298	-0.329255
CBG13478	B0304.8	-0.411187	-0.404412
CBG13455	B0304.9	-0.344443	-0.275004
CBG08159	B0310.1	-0.461214	-0.441177
CBG08158	B0310.2	-0.35338	-0.370455
CBG08157	B0310.5	-0.34175	-0.368261
CBG08153	B0310.6	-0.196396	-0.15649
CBG16423	B0344.2	-0.320511	-0.446765
CBG16410	B0395.1	-0.318356	-0.319433
CBG16409	B0395.2	-0.357744	-0.391698
CBG16408	B0395.3	-0.29238	-0.386427
CBG15290	B0412.4	-0.169148	-0.30293
CBG07046	B0432.1	-0.363609	-0.346144
CBG07019	B0432.10	-0.292832	-0.324238
CBG07021	B0432.13	-0.270319	-0.389488
CBG07025	B0432.14	-0.348953	-0.369026
CBG07016	B0432.2	-0.207886	-0.420303
CBG07017	B0432.3	-0.312413	-0.339914
CBG07018	B0432.4	-0.282962	-0.379485
CBG07026	B0432.5	-0.32131	-0.275043
CBG07024	B0432.7	-0.386443	-0.38553
CBG07020	B0432.9	-0.157826	-0.33076
CBG19631	B0454.1	-0.4414	-0.392358
CBG19629	B0454.2	-0.339373	-0.377623
CBG19627	B0454.5	-0.458728	-0.398245
CBG17854	B0462.4	-0.234552	-0.3531
CBG22449	B0513.1	-0.343487	-0.340279
CBG22401	B0513.2	-0.332017	-0.369072
CBG22399	B0513.4	-0.358296	-0.340329
CBG22398	B0513.5	-0.443125	-0.362032
CBG22395	B0513.9	-0.353155	-0.329705
CBG15159	B0524.2	-0.49704	-0.41126
CBG11744	B0524.6	-0.406658	-0.378748
CBG21048	B0546.1	-0.316956	-0.291954
CBG21043	B0546.2	-0.441862	-0.391896
CBG21046	B0546.3	-0.393656	-0.39062
CBG21047	B0546.4	-0.334554	-0.320209
CBG04040	B0546.5	-0.380866	-0.33994
CBG01362	B0554.7	-0.403064	-0.371215
CBG15141	BE0003N10.2	-0.379215	-0.428269
CBG15741	BE10.2	-0.496309	-0.492649
CBG15743	BE10.4	-0.427159	-0.444846
CBG15742	BE10.5	-0.430551	-0.426007
CBG20395	C01A2.4	-0.298117	-0.307351
CBG20397	C01A2.5	-0.477946	-0.350545
CBG20435	C01A2.7	-0.400619	-0.342625
CBG07014	C01B12.1	-0.257	-0.20475
CBG07045	C01B12.2	-0.328724	-0.320866
CBG07044	C01B12.3	-0.346233	-0.338327
CBG07042	C01B12.4	-0.323677	-0.367567
CBG07043	C01B12.5	-0.356259	-0.305326
CBG07013	C01B12.8	-0.215644	-0.24396
CBG03654	C01F1.1	-0.450074	-0.335112
CBG03655	C01F1.2	-0.42284	-0.268048
CBG03660	C01F1.5	-0.361212	-0.397417
CBG11087	C01G12.11	-0.181188	-0.0512857
CBG11085	C01G12.11	-0.158021	-0.0512857
CBG11084	C01G12.11	-0.134102	-0.0512857
CBG11079	C01G12.11	-0.114106	-0.0512857
CBG11086	C01G12.11	-0.087979	-0.0512857
CBG11081	C01G12.13	-0.400074	-0.356409
CBG11080	C01G12.7	-0.400104	-0.300425
CBG22411	C02A12.1	-0.324656	-0.257943
CBG10356	C02A12.8	-0.347662	-0.29656
CBG07725	C02C6.1	-0.44621	-0.287534
CBG07722	C02C6.2	-0.389377	-0.33108
CBG07723	C02C6.3	-0.36125	-0.355934
CBG07676	C02D4.1	-0.395763	-0.370049
CBG07677	C02D4.2	-0.402433	-0.387315
CBG22059	C02H7.1	-0.46245	-0.329258
CBG08123	C02H7.2	-0.344667	-0.317644
CBG08121	C02H7.3	-0.322065	-0.435346
CBG20205	C03C10.3	-0.322405	-0.322759
CBG07756	C03H12.1	-0.479961	-0.420947
CBG06965	C03H5.2	-0.22937	-0.331751
CBG06964	C03H5.3	-0.296058	-0.291143
CBG06962	C03H5.5	-0.382651	-0.411285
CBG07083	C03H5.6	-0.419825	-0.371198
CBG21051	C04C3.3	-0.485003	-0.380154
CBG21053	C04C3.6	-0.459178	-0.453688
CBG20872	C04H5.1	-0.177915	-0.281975
CBG20873	C04H5.2	-0.296779	-0.305555
CBG20868	C04H5.3	-0.415481	-0.364135
CBG20866	C04H5.8	-0.445405	-0.319795
CBG04135	C05D9.2	-0.31473	-0.340263
CBG04133	C05D9.3	-0.329674	-0.424381
CBG04132	C05D9.4	-0.324333	-0.219891
CBG04131	C05D9.5	-0.358933	-0.305014
CBG04134	C05D9.7	-0.256161	-0.407153
CBG13762	C05D9.9	-0.32913	-0.298426
CBG01358	C05E4.6	-0.300123	-0.320966
CBG00992	C05E4.7	-0.307101	-0.312897
CBG07580	C05G5.1	-0.472459	-0.315604
CBG07583	C05G5.2	-0.402962	-0.324243
CBG07584	C05G5.3	-0.363739	-0.259044
CBG07585	C05G5.4	-0.37647	-0.269596
CBG00388	C06A12.3	-0.380043	-0.383173
CBG00413	C06A12.5	-0.335067	-0.370885
CBG00412	C06A12.8	-0.292171	-0.311469
CBG16343	C06G1.1	-0.305401	-0.33206
CBG16345	C06G1.2	-0.213482	-0.191964
CBG16346	C06G1.4	-0.267018	-0.367696
CBG16342	C06G1.5	-0.347231	-0.365143
CBG05653	C06H5.7	-0.295066	-0.456042
CBG22058	C07F11.1	-0.442594	-0.430159
CBG22054	C07F11.2	-0.426738	-0.41639
CBG21419	C07G3.6	-0.238383	-0.304978
CBG15987	C08A9.10	-0.237039	-0.280979
CBG17853	C08E8.3	-0.378908	-0.311417
CBG23708	C08E8.9	-0.251326	-0.261387
CBG10327	C08F1.11	-0.187186	-0.308914
CBG10326	C08F1.11	-0.122444	-0.308914
CBG22335	C08F11.13	-0.341322	-0.327632
CBG22336	C08F11.13	-0.327077	-0.327632
CBG24293	C08G5.4	-0.443146	-0.3425
CBG16023	C08G5.6	-0.379613	-0.325617
CBG16018	C08G5.7	-0.328761	-0.338019
CBG07082	C09E8.2	-0.398051	-0.362068
CBG24274	C09E8.3	-0.374102	-0.413233
CBG13948	C09E9.1	-0.445375	-0.331925
CBG15256	C09F5.1	-0.349377	-0.401042
CBG15255	C09F5.2	-0.232625	-0.439406
CBG04265	C09F9.2	-0.418498	-0.429223
CBG04264	C09F9.3	-0.401587	-0.427892
CBG16414	C09G1.4	-0.395397	-0.451133
CBG15990	C09G1.5	-0.313101	-0.336248
CBG15039	C09G12.1	-0.326015	-0.383035
CBG22633	C09G12.11	-0.297053	-0.440177
CBG22634	C09G12.11	-0.281319	-0.440177
CBG22637	C09G12.11	-0.254586	-0.440177
CBG15040	C09G12.17	-0.326128	-0.374032
CBG15030	C09G12.9	-0.375298	-0.321114
CBG15029	C09G12.9	-0.315782	-0.321114
CBG16243	C10E2.1	-0.348325	-0.379185
CBG16327	C10E2.2	-0.352721	-0.28714
CBG16328	C10E2.3	-0.378794	-0.342496
CBG16326	C10E2.5	-0.323647	-0.322952
CBG07621	C11G10.1	-0.19442	-0.368792
CBG16377	C11G6.1	-0.442219	-0.308363
CBG07249	C11H1.2	-0.342339	-0.311395
CBG07248	C11H1.3	-0.40915	-0.42614
CBG07244	C11H1.4	-0.400247	-0.484997
CBG07250	C11H1.5	-0.378117	-0.356014
CBG07243	C11H1.7	-0.349703	-0.338105
CBG07245	C11H1.9	-0.488224	-0.412342
CBG07173	C13A10.1	-0.434957	-0.335418
CBG07175	C13A10.2	-0.40823	-0.29307
CBG00984	C13B4.2	-0.208698	-0.348302
CBG24218	C14B1.6	-0.426785	-0.448832
CBG10467	C14C6.2	-0.290023	-0.341342
CBG04364	C15C6.2	-0.440242	-0.458059
CBG23841	C15C6.3	-0.375724	-0.347768
CBG21947	C16A11.1	-0.460263	-0.375388
CBG21961	C16A11.5	-0.473864	-0.375968
CBG21955	C16A11.5	-0.449305	-0.375968
CBG21957	C16A11.5	-0.442269	-0.375968
CBG21956	C16A11.5	-0.409192	-0.375968
CBG21960	C16A11.5	-0.268867	-0.375968
CBG21945	C16A11.8	-0.409533	-0.34543
CBG20158	C16C10.1	-0.34507	-0.373333
CBG20174	C16C10.10	-0.305108	-0.229652
CBG20173	C16C10.11	-0.3497	-0.217116
CBG20156	C16C10.13	-0.362498	-0.238659
CBG20157	C16C10.2	-0.306983	-0.25602
CBG20155	C16C10.4	-0.267887	-0.255352
CBG20154	C16C10.5	-0.413065	-0.3211
CBG20153	C16C10.6	-0.452185	-0.322636
CBG20152	C16C10.7	-0.455685	-0.285172
CBG20151	C16C10.8	-0.370211	-0.30359
CBG20171	C16C10.9	-0.416556	-0.364649
CBG15695	C16C8.18	-0.402419	-0.367691
CBG17769	C16C8.19	-0.371896	-0.2715
CBG17768	C16C8.2	-0.433767	-0.465738
CBG24646	C16C8.22	-0.368024	-0.33363
CBG24651	C16C8.22	-0.254237	-0.33363
CBG01881	C16H3.1	-0.372401	-0.3226
CBG01879	C16H3.2	-0.207375	-0.342263
CBG01880	C16H3.3	-0.378091	-0.345947
CBG20594	C17A2.2	-0.400893	-0.229479
CBG15806	C17D12.1	-0.388487	-0.452159
CBG15357	C17D12.5	-0.409807	-0.451407
CBG15356	C17D12.6	-0.421049	-0.379745
CBG10462	C17E7.1	-0.382867	-0.276953
CBG01328	C17E7.8	-0.363429	-0.348835
CBG13832	C17E7.9	-0.492946	-0.442872
CBG21481	C17F4.2	-0.418595	-0.311577
CBG07642	C18B12.2	-0.331882	-0.405967
CBG07641	C18B12.3	-0.325876	-0.325073
CBG07640	C18B12.4	-0.486602	-0.354472
CBG07646	C18B12.6	-0.308426	-0.391002
CBG00410	C18D4.5	-0.301091	-0.458371
CBG08814	C18G1.1	-0.455959	-0.352253
CBG08810	C18G1.2	-0.34386	-0.332597
CBG08808	C18G1.7	-0.408875	-0.364998
CBG21291	C18H7.1	-0.367438	-0.441055
CBG21287	C18H7.9	-0.389662	-0.286532
CBG06994	C23H3.1	-0.341459	-0.271547
CBG06997	C23H3.2	-0.346178	-0.376503
CBG06999	C23H3.4	-0.362112	-0.34135
CBG07001	C23H3.5	-0.202321	-0.258681
CBG07000	C23H3.7	-0.268688	-0.2648
CBG06992	C23H3.9	-0.340091	-0.332884
CBG10551	C23H5.2	-0.366378	-0.41619
CBG10549	C23H5.3	-0.495797	-0.260136
CBG10557	C23H5.8	-0.360959	-0.350254
CBG10552	C23H5.9	-0.390713	-0.387193
CBG15244	C24A1.1	-0.270737	-0.317628
CBG15248	C24A1.2	-0.379096	-0.388777
CBG15247	C24A1.3	-0.275261	-0.341701
CBG24587	C24B9.1	-0.472498	-0.228756
CBG11307	C24B9.2	-0.434848	-0.319562
CBG13733	C24B9.8	-0.394097	-0.268447
CBG04963	C24B9.8	-0.337054	-0.268447
CBG04884	C24B9.8	-0.331656	-0.268447
CBG04853	C24B9.8	-0.321308	-0.268447
CBG04904	C24B9.8	-0.259286	-0.268447
CBG04873	C24G7.4	-0.391023	-0.331141
CBG04870	C24G7.4	-0.308078	-0.331141
CBG20877	C24H11.3	-0.177365	-0.413444
CBG07061	C24H12.2	-0.296	-0.33444
CBG07062	C24H12.4	-0.244356	-0.473985
CBG10363	C25G6.1	-0.408696	-0.348615
CBG08051	C25G6.2	-0.23174	-0.282982
CBG08050	C25G6.3	-0.328681	-0.438001
CBG08052	C25G6.4	-0.241651	-0.350877
CBG08053	C25G6.5	-0.286521	-0.446295
CBG07569	C26G2.2	-0.406623	-0.458161
CBG15303	C27C12.2	-0.468166	-0.304029
CBG07600	C27C12.2	-0.342733	-0.304029
CBG07602	C27C12.4	-0.342901	-0.281115
CBG07601	C27C12.5	-0.393279	-0.277135
CBG07603	C27C12.6	-0.350576	-0.322049
CBG07598	C27C12.7	-0.340923	-0.351636
CBG25456	C29F9.6	-0.348515	-0.441727
CBG15792	C29F9.7	-0.402573	-0.340122
CBG22545	C29G2.1	-0.41338	-0.23104
CBG20190	C30D11.1	-0.428527	-0.416653
CBG20185	C30D11.1	-0.338741	-0.416653
CBG23978	C30E1.4	-0.49898	-0.449299
CBG16404	C30F2.2	-0.29322	-0.392717
CBG16402	C30F2.3	-0.280252	-0.301243
CBG16405	C30F2.4	-0.254722	-0.371309
CBG16401	C30F2.5	-0.267223	-0.34598
CBG15977	C30G4.2	-0.392629	-0.26246
CBG15980	C30G4.4	-0.3958	-0.339758
CBG15981	C30G4.4	-0.382007	-0.339758
CBG00401	C30H6.10	-0.338242	-0.295033
CBG00407	C30H6.12	-0.295985	-0.290418
CBG00400	C30H6.2	-0.314105	-0.297917
CBG00397	C30H6.4	-0.239836	-0.320955
CBG00402	C30H6.5	-0.41717	-0.311243
CBG00403	C30H6.6	-0.299914	-0.439272
CBG00405	C30H6.7	-0.281941	-0.313234
CBG00406	C30H6.8	-0.183811	-0.280061
CBG00404	C30H6.9	-0.254604	-0.15142
CBG24408	C31A11.6	-0.366125	-0.386386
CBG24409	C31A11.7	-0.464687	-0.41583
CBG08876	C31A11.9	-0.454117	-0.457227
CBG01361	C31B8.11	-0.329282	-0.402286
CBG10438	C31B8.16	-0.195756	-0.410039
CBG17803	C31G12.4	-0.48269	-0.404581
CBG27309	C31G12.4	-0.389909	-0.404581
CBG18623	C31G12.4	-0.356657	-0.404581
CBG18619	C31G12.4	-0.351732	-0.404581
CBG18620	C31G12.4	-0.210149	-0.404581
CBG21288	C32H11.11	-0.163455	-0.249969
CBG07688	C33A11.1	-0.403276	-0.397614
CBG07690	C33A11.2	-0.404533	-0.388459
CBG07689	C33A11.2	-0.396396	-0.388459
CBG07691	C33A11.4	-0.358743	-0.369091
CBG17056	C33C12.8	-0.415368	-0.456656
CBG17050	C33C12.8	-0.380535	-0.456656
CBG21464	C33C12.9	-0.365726	-0.365311
CBG13565	C34H4.1	-0.401224	-0.32974
CBG05174	C34H4.3	-0.474438	-0.415494
CBG13563	C34H4.4	-0.192938	-0.360965
CBG24535	C35B1.1	-0.485092	-0.368913
CBG23918	C35B1.5	-0.407555	-0.284042
CBG21486	C35B1.7	-0.394965	-0.388006
CBG21490	C35B1.8	-0.439707	-0.395895
CBG08467	C35E7.11	-0.367152	-0.358786
CBG08468	C35E7.2	-0.417887	-0.428511
CBG08470	C35E7.3	-0.271577	-0.265281
CBG01478	C36A4.4	-0.258673	-0.335105
CBG00819	C36A4.4	-0.219939	-0.335105
CBG03613	C36A4.9	-0.434809	-0.269958
CBG01414	C36C5.9	-0.342939	-0.326989
CBG07821	C36C9.5	-0.432149	-0.452784
CBG07817	C36C9.5	-0.365557	-0.452784
CBG01857	C36E6.2	-0.389963	-0.360698
CBG01858	C36E6.5	-0.26434	-0.176241
CBG01859	C36E6.5	-0.26434	-0.176241
CBG03635	C36E8.2	-0.388497	-0.346387
CBG03632	C36E8.3	-0.411605	-0.404891
CBG03621	C36E8.4	-0.376224	-0.400913
CBG18804	C37A5.7	-0.375056	-0.431381
CBG18817	C37A5.8	-0.340943	-0.278195
CBG18814	C37A5.8	-0.29186	-0.278195
CBG18802	C37A5.9	-0.405989	-0.457863
CBG13868	C37F5.1	-0.46816	-0.361209
CBG08821	C37H5.2	-0.401412	-0.295735
CBG08826	C37H5.5	-0.407683	-0.429296
CBG08827	C37H5.8	-0.258854	-0.204985
CBG04944	C38C3.9	-0.372625	-0.473947
CBG10390	C38C3.9	-0.280958	-0.473947
CBG11071	C38C6.2	-0.435652	-0.372776
CBG11070	C38C6.4	-0.392433	-0.47436
CBG11063	C38C6.6	-0.47601	-0.296845
CBG11685	C39B5.14	-0.413871	-0.473648
CBG22207	C39B5.2	-0.425241	-0.376291
CBG12276	C39B5.2	-0.401895	-0.376291
CBG22205	C39B5.2	-0.379313	-0.376291
CBG17464	C39B5.2	-0.375814	-0.376291
CBG22068	C39B5.2	-0.364619	-0.376291
CBG22289	C39B5.2	-0.351404	-0.376291
CBG11334	C39B5.2	-0.331725	-0.376291
CBG11246	C39B5.2	-0.321181	-0.376291
CBG17466	C39B5.2	-0.26656	-0.376291
CBG01515	C39B5.2	-0.166563	-0.376291
CBG08792	C39B5.2	-0.116648	-0.376291
CBG01508	C39B5.2	-0.096962	-0.376291
CBG15648	C39B5.5	-0.339217	-0.415619
CBG15105	C39B5.6	-0.455872	-0.412779
CBG15269	C39B5.6	-0.455872	-0.412779
CBG15106	C39B5.6	-0.323905	-0.412779
CBG05547	C39E9.3	-0.233646	-0.303406
CBG22345	C39E9.6	-0.446716	-0.247727
CBG04003	C41D11.2	-0.250659	-0.245355
CBG04000	C41D11.5	-0.287804	-0.263361
CBG04002	C41D11.8	-0.191692	-0.340295
CBG04001	C41D11.9	-0.252186	-0.331808
CBG06961	C41D7.2	-0.315292	-0.328309
CBG10311	C41H7.7	-0.414415	-0.420132
CBG26137	C44B11.4	-0.436715	-0.389303
CBG22551	C44B12.2	-0.39706	-0.356819
CBG13962	C44B12.5	-0.434357	-0.328725
CBG13955	C44B12.6	-0.353763	-0.362613
CBG26514	C44B12.6	-0.270451	-0.362613
CBG08079	C44C1.1	-0.302622	-0.313811
CBG08083	C44C1.2	-0.30836	-0.39312
CBG08082	C44C1.3	-0.343149	-0.315779
CBG08081	C44C1.4	-0.334917	-0.347266
CBG08080	C44C1.5	-0.313391	-0.331507
CBG20938	C44C11.1	-0.399111	-0.476523
CBG19539	C44C8.10	-0.317314	-0.323604
CBG11657	C44C8.10	-0.227045	-0.323604
CBG11844	C44C8.7	-0.396266	-0.152978
CBG00315	C44C8.7	-0.349766	-0.152978
CBG00317	C44C8.7	-0.336687	-0.152978
CBG00316	C44C8.7	-0.287273	-0.152978
CBG00314	C44C8.7	-0.244478	-0.152978
CBG07554	C44H4.1	-0.452314	-0.381584
CBG07555	C44H4.2	-0.494584	-0.25302
CBG07556	C44H4.3	-0.257909	-0.238804
CBG07557	C44H4.4	-0.368924	-0.346655
CBG07560	C44H4.6	-0.353445	-0.365088
CBG07561	C44H4.7	-0.466297	-0.361173
CBG07559	C44H4.8	-0.383596	-0.16388
CBG04204	C45E1.1	-0.343158	-0.439905
CBG04207	C45E1.4	-0.308131	-0.451995
CBG25266	C45E1.5	-0.328162	-0.30386
CBG22559	C45G7.4	-0.38086	-0.395165
CBG22513	C45G7.5	-0.43895	-0.426111
CBG21495	C45H4.12	-0.424179	-0.417541
CBG18412	C45H4.12	-0.415711	-0.417541
CBG18411	C45H4.12	-0.412503	-0.417541
CBG21823	C45H4.17	-0.380093	-0.374717
CBG21837	C45H4.17	-0.380093	-0.374717
CBG21822	C45H4.17	-0.299167	-0.374717
CBG08726	C45H4.18	-0.247383	-0.342401
CBG18647	C46E10.6	-0.36932	-0.415177
CBG21429	C46E10.6	-0.339252	-0.415177
CBG04143	C46H3.2	-0.335635	-0.362283
CBG08049	C46H3.3	-0.336563	-0.412473
CBG04144	C46H3.3	-0.298812	-0.412473
CBG05678	C47A10.5	-0.291167	-0.403064
CBG05677	C47A10.6	-0.318652	-0.390441
CBG11463	C47A10.8	-0.210589	-0.424524
CBG22355	C47A4.2	-0.433839	-0.378478
CBG07940	C47B2.2	-0.484142	-0.345939
CBG07938	C47B2.4	-0.365591	-0.167621
CBG07937	C47B2.5	-0.482436	-0.327513
CBG07935	C47B2.6	-0.474301	-0.469363
CBG07933	C47B2.9	-0.490708	-0.493373
CBG18806	C49A1.1	-0.378274	-0.394854
CBG18791	C49A1.10	-0.456852	-0.332008
CBG18807	C49A1.4	-0.453002	-0.406631
CBG00451	C49C3.1	-0.377575	-0.297733
CBG00447	C49C3.10	-0.318462	-0.299867
CBG00393	C49C3.11	-0.238667	-0.284596
CBG00394	C49C3.12	-0.310356	-0.27799
CBG00399	C49C3.13	-0.429134	-0.321475
CBG00395	C49C3.13	-0.358475	-0.321475
CBG00500	C49C3.5	-0.440316	-0.343491
CBG00448	C49C3.8	-0.251526	-0.247135
CBG00392	C49C3.9	-0.346549	-0.262137
CBG25501	C49D10.11	-0.262983	-0.26449
CBG07282	C49D10.11	-0.208208	-0.26449
CBG07015	C49G7.11	-0.343456	-0.239809
CBG01398	C49G7.12	-0.352817	-0.272408
CBG01404	C49G7.4	-0.374896	-0.275173
CBG01405	C49G7.4	-0.31555	-0.275173
CBG13959	C50A2.3	-0.374166	-0.35444
CBG13954	C50A2.4	-0.402096	-0.407894
CBG06983	C50D2.1	-0.342348	-0.296648
CBG06984	C50D2.2	-0.36465	-0.239351
CBG06985	C50D2.3	-0.244896	-0.442583
CBG06986	C50D2.4	-0.34543	-0.286614
CBG06987	C50D2.5	-0.268227	-0.270727
CBG06990	C50D2.6	-0.417869	-0.405502
CBG06988	C50D2.8	-0.28548	-0.318137
CBG06989	C50D2.9	-0.349	-0.371633
CBG25683	C50E10.1	-0.330195	-0.36388
CBG20945	C50E10.10	-0.419562	-0.342126
CBG24975	C50E10.10	-0.326406	-0.342126
CBG20944	C50E10.11	-0.227532	-0.292401
CBG20942	C50E10.5	-0.439798	-0.409601
CBG24976	C50E10.9	-0.38197	-0.282674
CBG16999	C50H11.13	-0.377222	-0.269745
CBG22433	C50H11.7	-0.454763	-0.416942
CBG08054	C52B11.5	-0.290375	-0.307179
CBG00359	C52D10.11	-0.389784	-0.304724
CBG00360	C52D10.12	-0.366608	-0.329551
CBG00357	C52D10.3	-0.340972	-0.354361
CBG00355	C52D10.3	-0.339154	-0.354361
CBG27466	C53C11.2	-0.289541	-0.329017
CBG15940	C53C11.5	-0.426616	-0.310396
CBG22074	C53D5.1	-0.376623	-0.356008
CBG22019	C53D5.2	-0.406138	-0.396647
CBG22020	C53D5.3	-0.21322	-0.332471
CBG22062	C53D5.6	-0.269122	-0.223872
CBG22212	C53H9.1	-0.410828	-0.171187
CBG22213	C53H9.2	-0.21231	-0.368433
CBG25674	C54E10.6	-0.336136	-0.302117
CBG13874	C54E4.1	-0.479448	-0.486257
CBG13876	C54E4.3	-0.488408	-0.413195
CBG13885	C54E4.4	-0.468347	-0.379897
CBG10559	C54E4.5	-0.45354	-0.422627
CBG22104	C54G6.1	-0.389909	-0.474827
CBG22108	C54G6.3	-0.357101	-0.425583
CBG22028	C54G6.5	-0.329716	-0.456211
CBG04163	C55C2.1	-0.335245	-0.351501
CBG04164	C55C2.5	-0.499801	-0.436253
CBG08316	CC8.2	-0.418925	-0.387699
CBG08312	CC8.3	-0.392089	-0.268851
CBG16421	cTel55X.1	-0.325162	-0.318673
CBG24512	D1005.1	-0.29713	-0.420643
CBG24514	D1005.2	-0.379217	-0.360444
CBG27395	D1005.3	-0.18407	-0.221959
CBG24511	D1005.4	-0.29386	-0.313413
CBG24513	D1005.6	-0.281408	-0.363648
CBG21096	D1025.1	-0.437894	-0.354024
CBG21093	D1025.1	-0.436761	-0.354024
CBG07483	D1025.1	-0.369175	-0.354024
CBG17059	D1025.1	-0.354539	-0.354024
CBG07481	D1025.2	-0.345409	-0.258735
CBG10614	D1025.8	-0.26883	-0.209457
CBG10623	D1025.9	-0.183255	-0.280478
CBG10368	D1065.4	-0.38316	-0.27387
CBG10367	D1065.5	-0.322847	-0.299594
CBG06953	D1069.1	-0.352952	-0.329772
CBG07054	D1069.2	-0.387422	-0.362223
CBG06954	D1069.4	-0.306045	-0.433478
CBG19490	D2062.2	-0.487683	-0.241909
CBG27455	D2062.5	-0.384689	-0.346061
CBG04348	D2062.9	-0.281284	-0.372086
CBG05585	E01B7.1	-0.387505	-0.444203
CBG05650	E01B7.2	-0.310224	-0.359366
CBG20885	E01F3.1	-0.446592	-0.384922
CBG07259	E02H4.1	-0.393604	-0.315477
CBG07253	E02H4.3	-0.384531	-0.349858
CBG10595	E02H4.7	-0.361804	-0.299621
CBG15675	E02H9.8	-0.416338	-0.452257
CBG20197	E03A3.2	-0.345765	-0.437131
CBG20204	E03A3.6	-0.451701	-0.349497
CBG20203	E03A3.6	-0.399247	-0.349497
CBG01427	E03D2.1	-0.362877	-0.301078
CBG01431	E03D2.2	-0.446594	-0.385342
CBG01423	E03D2.4	-0.492331	-0.264995
CBG15991	E03G2.4	-0.294704	-0.401147
CBG16370	F01G12.1	-0.343739	-0.273799
CBG16373	F01G12.2	-0.326299	-0.340746
CBG16372	F01G12.5	-0.352312	-0.379298
CBG25764	F02E11.2	-0.385387	-0.36889
CBG19456	F02E11.3	-0.420076	-0.319448
CBG08763	F02E11.3	-0.396867	-0.319448
CBG25526	F02E11.3	-0.391655	-0.319448
CBG04331	F02E11.3	-0.358229	-0.319448
CBG21482	F02E11.7	-0.469635	-0.3674
CBG08127	F02G3.1	-0.346746	-0.348226
CBG18748	F02H6.5	-0.350841	-0.31081
CBG20443	F07E5.5	-0.44885	-0.382786
CBG26221	F08A7.1	-0.287083	-0.307471
CBG07943	F08A8.4	-0.425092	-0.293797
CBG07947	F08A8.4	-0.38367	-0.293797
CBG07944	F08A8.4	-0.377118	-0.293797
CBG07946	F08A8.4	-0.363057	-0.293797
CBG07942	F08A8.8	-0.447017	-0.358577
CBG19592	F08D12.1	-0.268418	-0.348733
CBG19591	F08D12.12	-0.426123	-0.460205
CBG04965	F08E10.3	-0.315783	-0.414027
CBG07630	F09B12.1	-0.452143	-0.360624
CBG07631	F09B12.2	-0.331575	-0.346539
CBG07632	F09B12.3	-0.280268	-0.328714
CBG07635	F09B12.5	-0.310133	-0.420162
CBG07634	F09B12.6	-0.316816	-0.362248
CBG18783	F09C3.2	-0.424727	-0.384734
CBG16394	F09C8.1	-0.321941	-0.397679
CBG16396	F09C8.2	-0.350381	-0.447023
CBG04341	F09D1.1	-0.454576	-0.419514
CBG24510	F09E10.3	-0.289781	-0.308983
CBG24509	F09E10.5	-0.290097	-0.357903
CBG16428	F09E10.6	-0.332474	-0.364725
CBG16427	F09E10.7	-0.322517	-0.311546
CBG16426	F09E10.8	-0.47856	-0.40869
CBG08842	F09E8.5	-0.385358	-0.361785
CBG15937	F10D7.1	-0.417259	-0.325181
CBG15936	F10D7.2	-0.413959	-0.313239
CBG15935	F10D7.3	-0.37344	-0.339704
CBG07261	F11C3.1	-0.291245	-0.383024
CBG07262	F11C3.1	-0.289702	-0.383024
CBG15930	F11C7.1	-0.380906	-0.31536
CBG15924	F11C7.2	-0.310805	-0.255406
CBG15925	F11C7.3	-0.304522	-0.31563
CBG15921	F11C7.4	-0.462345	-0.346784
CBG15929	F11C7.5	-0.31036	-0.473018
CBG15922	F11C7.6	-0.400664	-0.251338
CBG15923	F11C7.7	-0.28608	-0.263064
CBG00017	F11D11.14	-0.310763	-0.427605
CBG17848	F11D11.14	-0.268791	-0.427605
CBG00434	F11E6.1	-0.256622	-0.39204
CBG26219	F11E6.11	-0.268054	-0.264375
CBG00436	F11E6.3	-0.282583	-0.260779
CBG20963	F11E6.4	-0.362255	-0.282627
CBG00437	F11E6.4	-0.269257	-0.282627
CBG00438	F11E6.5	-0.198617	-0.2724
CBG00439	F11E6.6	-0.276913	-0.338112
CBG00445	F11E6.8	-0.326105	-0.32445
CBG21220	F11F1.6	-0.416139	-0.304197
CBG21215	F11F1.7	-0.443528	-0.32061
CBG10502	F11F1.8	-0.312039	-0.328362
CBG10505	F11F1.8	-0.312039	-0.328362
CBG10503	F11F1.8	-0.248804	-0.328362
CBG10504	F11F1.8	-0.19151	-0.328362
CBG21435	F12E12.2	-0.324002	-0.356967
CBG23614	F13A2.4	-0.206574	-0.341087
CBG23613	F13A2.5	-0.363762	-0.2765
CBG14997	F13A2.8	-0.365911	-0.317728
CBG26638	F13A2.9	-0.355515	-0.306973
CBG11439	F13A7.11	-0.180449	-0.314319
CBG22892	F13A7.13	-0.366382	-0.444742
CBG22893	F13A7.14	-0.284126	-0.403499
CBG22813	F13A7.3	-0.431389	-0.431462
CBG15287	F13A7.7	-0.341182	-0.340251
CBG03611	F13B10.1	-0.377962	-0.404073
CBG03612	F13B10.2	-0.394082	-0.396431
CBG08142	F13C5.1	-0.286919	-0.345176
CBG08144	F13C5.2	-0.315311	-0.295957
CBG08143	F13C5.3	-0.359923	-0.362646
CBG08141	F13C5.5	-0.314247	-0.353918
CBG08140	F13C5.6	-0.34452	-0.404868
CBG21552	F13G11.1	-0.376868	-0.351498
CBG21562	F13G11.3	-0.339881	-0.375681
CBG07660	F14F4.1	-0.353408	-0.409696
CBG07659	F14F4.3	-0.343733	-0.416788
CBG15782	F14F7.1	-0.371071	-0.226566
CBG22621	F14F8.3	-0.432244	-0.360416
CBG27264	F14F8.9	-0.320389	-0.419296
CBG04971	F14F8.9	-0.274111	-0.419296
CBG20956	F15A4.1	-0.417333	-0.370302
CBG20954	F15A4.11	-0.213708	-0.24861
[truncated: 13,233 more rows]
