# Supplementary material
Source: HighWire-hosted journal article supplement (doi:10.1101/rna.067405.118)
Supplement: Supplemental_File_S5.xlsx [file Supplemental_File_S5.xlsx]

## Sheet: Key
Column	Description
TE_class	Transposon class, defined by RepeatMasker
TE_family	Transposon family, defined by RepeatMasker
TE_name	Transposon name, from RepeatMasker
Palindromic?	YES/No designation of whether the transposon is defined by Repbase as palindromic.
TEs_in_genome	Number of times the transposon appears in the RepeatMasker ce10 genome annotation
#Genes overlapped	Of the genes of interest on autosome arms, the number that overlap transposons in a category
%Genes overlapped	Of the genes of interest on autosome arms, the percentage that overlap the transposon
#Genes expected to overlap	The average number of genes on autosome arms expected to overlap transposons in a given category, predicted by randomizing the location of genes in 1000 iterations.
%Genes expected to overlap	The average percentage of genes on autosome arms expected to overlap transposons in a given category, predicted by randomizing the location of genes in 1000 iterations.
Observed /Expected	The ratio of observed genes overlapping a transposon category to the expected number. A ratio above 1 indicates enrichment, while a ratio below 1 indicates depletion.
Binomial test pval	P-value from a binomial test used to predict the probability that the observed overlaps would occur by random chance.
Significance	Indicates significant differences (*: P < 0.05; **: P < 0.01; ***: P < 0.001).

## Sheet: Genes FPKM > 50
1370 total genes (genes on autosome distal arms expressed >50 FPKM in any developmental stage measured in Reich et al. Genes Dev 2018)
1000 randomized trials
The binomial test is done with binom.test from R, two sided
TE_class	TE_family	TE_name	Palindromic?	TEs_in_genome	#Genes overlapped	%Genes overlapped	#Genes expected to overlap	%Genes expected to overlap	Observed /Expected	Binomial test pval	Significance
LTR	Pao	CER16-2-I_CE	No	7	5	0.364964	1.40828	0.102794	3.55042	0.004801	**
DNA	DNA	PAL5A_CE	YES	352	89	6.49635	40.455	2.95292	2.19998	9.77e-13	***
LTR	Pao	CER15-1-I_CE	No	60	15	1.09489	7.62262	0.556396	1.96783	0.009803	**
DNA	hAT	PAL8B_CE	YES	22	4	0.291971	2.14561	0.156614	1.86427	0.1612	ns
LTR	Gypsy	CER3-1-LTR_CE	No	20	4	0.291971	2.32491	0.169702	1.72049	0.2811	ns
Unknown	Unknown	TR5	No	3	2	0.145985	1.1746	0.0857375	1.7027	0.5651	ns
DNA	hAT	PAL8C_4	No	80	9	0.656934	5.36373	0.391513	1.67794	0.1133	ns
DNA	TcMar-Tc1?	PALTA4_CE	YES	84	14	1.0219	9.282	0.677518	1.5083	0.1145	ns
LTR	Gypsy	CER1	No	20	4	0.291971	2.69911	0.197015	1.48197	0.3353	ns
DNA	hAT?	PAL8D_CE	No	70	11	0.80292	7.43343	0.542586	1.4798	0.1721	ns
DNA	PiggyBac?	PALTTAA3_CE	YES	1391	124	9.05109	88.191	6.4373	1.40604	0.0001757	***
DNA	TcMar-Tc1?	CELE1	YES	1553	209	15.2555	157.399	11.489	1.32784	3.04e-05	***
RC	Helitron	Helitron1_CE	No	343	48	3.50365	37.341	2.72562	1.28545	0.06852	ns
RC	Helitron	HelitronY1_CE	No	723	89	6.49635	69.243	5.05423	1.28533	0.01611	*
DNA	DNA	IR4	No	120	14	1.0219	11.012	0.803796	1.27134	0.3409	ns
DNA	PiggyBac?	IR3_CE	YES	225	29	2.11679	22.948	1.67504	1.26373	0.1855	ns
DNA	DNA	CELE46B	No	1076	94	6.86131	74.94	5.47007	1.25434	0.02648	*
DNA	PiggyBac?	PALTTAA1_CE	YES	1192	122	8.90511	97.746	7.13474	1.24813	0.01297	*
DNA	TcMar-Tc1?	CELE6	No	142	13	0.948905	10.719	0.782409	1.2128	0.4275	ns
DNA?	DNA?	CERP2	YES	326	40	2.91971	33.836	2.46978	1.18217	0.275	ns
DNA	hAT	PAL8C_3	No	116	9	0.656934	7.68068	0.560634	1.17177	0.5742	ns
RC	Helitron	HelitronY1A_CE	No	1383	151	11.0219	130.738	9.54292	1.15498	0.06589	ns
DNA	hAT	HAT3_CE	No	326	35	2.55474	30.56	2.23066	1.14529	0.392	ns
LINE	CR1	LINE2B_CE	No	44	4	0.291971	3.52287	0.257144	1.13544	0.778	ns
DNA	CMC-Chapaev?	NPAL5A_CE	No	149	18	1.31387	16.012	1.16876	1.12416	0.5958	ns
DNA	DNA	PAL3A_CE	No	401	39	2.84672	34.988	2.55387	1.11467	0.4784	ns
DNA	DNA	CELE14A	No	616	62	4.52555	56.594	4.13095	1.09552	0.4428	ns
LINE	CR1	LINE2C1_CE	No	49	5	0.364964	4.57013	0.333586	1.09406	0.8043	ns
DNA	DNA	NPALTA1_CE	No	254	25	1.82482	22.907	1.67204	1.09137	0.6605	ns
DNA	DNA	CELE42	No	940	105	7.66423	98.355	7.1792	1.06756	0.4883	ns
LTR	LTR	LTR2_CE	No	14	2	0.145985	1.87879	0.137138	1.06452	1	ns
DNA	DNA	TIR21T5A_CE	No	100	10	0.729927	9.414	0.687153	1.06225	0.8633	ns
DNA	hAT	PAL8C_2	No	79	4	0.291971	3.77277	0.275385	1.06023	0.7911	ns
DNA	DNA	PALTTTAAA1	YES	466	46	3.35766	43.697	3.18956	1.0527	0.6911	ns
DNA	DNA	CELE7	YES	839	79	5.76642	77.085	5.62664	1.02484	0.811	ns
DNA	DNA	CELE2	YES	2868	284	20.7299	277.182	20.2323	1.0246	0.6582	ns
DNA	DNA	CERP4	No	401	28	2.0438	27.543	2.01044	1.01659	0.9212	ns
DNA	DNA	CELE4	No	767	83	6.05839	82.861	6.04825	1.00168	0.9537	ns
DNA	MULE-MuDR	CEMUDR1	No	429	33	2.40876	34.328	2.50569	0.961314	0.929	ns
SINE	tRNA-RTE	CELE45	No	457	21	1.53285	21.847	1.59467	0.96123	1	ns
DNA	DNA	PALTTTAAA2	YES	797	65	4.74453	67.687	4.94066	0.960303	0.7993	ns
DNA	DNA	CELE14B	No	2391	195	14.2336	203.201	14.8322	0.959641	0.5822	ns
RC	Helitron	HelitronY2_CE	No	343	28	2.0438	30.215	2.20547	0.926692	0.7748	ns
DNA	MULE-MuDR	PAL9A_CE	YES	78	7	0.510949	7.627	0.556715	0.917792	1	ns
DNA	TcMar-Tc1?	PALTA3_CE	YES	287	18	1.31387	20.006	1.46029	0.89973	0.7284	ns
DNA	DNA	TIR54TA1_CE	YES	115	8	0.583942	8.978	0.655328	0.891067	0.8628	ns
Unknown	Unknown	CERP16	No	1456	114	8.32117	130.29	9.51022	0.874971	0.1417	ns
RC	Helitron	Helitron2_CE	No	549	48	3.50365	55.003	4.01482	0.87268	0.3553	ns
Unknown	Unknown	LR9A	No	2015	154	11.2409	177.698	12.9707	0.866639	0.06474	ns
RC	Helitron	HelitronY4_CE	No	690	54	3.94161	63.875	4.66241	0.845401	0.2119	ns
DNA	TcMar-Tc1?	PALTA2_CE	YES	103	7	0.510949	8.381	0.611752	0.835223	0.856	ns
LTR	Pao	CER10-I_CE	No	6	1	0.0729927	1.20913	0.0882573	0.827044	1	ns
Unknown	Unknown	CERP3	No	2661	202	14.7445	245.991	17.9555	0.821168	0.002877	**
DNA	DNA	TIR9TA1A_CE	No	57	3	0.218978	3.69175	0.269471	0.812622	1	ns
DNA	MULE-MuDR	CeRep1A	No	40	4	0.291971	4.92663	0.359608	0.811914	0.8126	ns
DNA	hAT	HAT4_CE	No	73	6	0.437956	7.578	0.553139	0.791766	0.7012	ns
DNA	hAT	HAT2_CE	No	169	12	0.875912	15.164	1.10686	0.791348	0.4998	ns
DNA	hAT	HAT1_CE	No	1524	108	7.88321	137.312	10.0228	0.78653	0.008232	**
LTR	Pao	CER16-I_CE	No	4	1	0.0729927	1.27273	0.0928998	0.785714	1	ns
DNA	DNA	TIR9TA1_CE	No	356	18	1.31387	23.616	1.7238	0.762195	0.2856	ns
DNA	TcMar-Tc2	TC2	No	196	11	0.80292	14.459	1.0554	0.760772	0.4125	ns
DNA	TcMar-Mariner	Mariner3_CE	No	69	5	0.364964	6.60661	0.482234	0.756818	0.682	ns
DNA	hAT	PAL8C_1	No	67	3	0.218978	4.00404	0.292266	0.749242	0.7985	ns
LTR	Pao	CER12-1-LTR_CE	No	8	1	0.0729927	1.36863	0.0998998	0.730659	1	ns
DNA	hAT	PAL8C_5	No	61	3	0.218978	4.1144	0.300321	0.729146	0.7983	ns
DNA	TcMar-Mariner	MAR_CE	No	53	3	0.218978	4.24617	0.309939	0.706519	0.7984	ns
DNA	hAT	TIR9TA1C_CE	No	448	32	2.33577	45.592	3.32788	0.701878	0.03446	*
DNA	CMC-Chapaev	Chapaev-1_CE	No	71	5	0.364964	7.164	0.52292	0.697934	0.5526	ns
LTR	Pao	CER2-1-LTR_CE	No	8	1	0.0729927	1.43524	0.104762	0.696746	1	ns
LTR	Gypsy	CER2-LTR_CE	No	6	1	0.0729927	1.43947	0.105071	0.694698	1	ns
DNA	DNA	PALTTTAAA3	YES	163	12	0.875912	17.289	1.26197	0.694083	0.2036	ns
SINE	R2?	SINE1_CE	No	61	4	0.291971	5.84184	0.426412	0.684716	0.6606	ns
DNA	Merlin	Merlin1m_CE	No	8	1	0.0729927	1.46337	0.106815	0.683356	1	ns
LTR	Gypsy	LTRCER1	No	17	1	0.0729927	1.48115	0.108113	0.675152	1	ns
Unknown	Unknown	CERP1	No	121	8	0.583942	11.879	0.86708	0.673457	0.2851	ns
DNA	CMC-Mirage	PALNN1_CE	YES	34	2	0.145985	3.10831	0.226884	0.643437	0.7659	ns
LINE	CR1	LINE2H_CE	No	29	2	0.145985	3.12698	0.228247	0.639594	0.7642	ns
DNA	TcMar-Tc4	TC5A	No	80	5	0.364964	7.83383	0.571813	0.638257	0.35	ns
DNA	TcMar-Tc4	TC4	No	195	9	0.656934	14.433	1.0535	0.623571	0.1695	ns
LTR	Pao	CER12-LTR_CE	No	12	1	0.0729927	1.61431	0.117833	0.619459	1	ns
LTR	Pao	CER15-I_CE	No	9	1	0.0729927	1.66562	0.121578	0.600379	1	ns
LTR	Gypsy	CER2-I_CE	No	9	1	0.0729927	1.67683	0.122396	0.596364	1	ns
DNA	DNA	CELE46A	No	2148	74	5.40146	124.352	9.07679	0.595085	7.144e-07	***
DNA	CMC-Mirage	MIRAGE1	No	61	3	0.218978	5.10585	0.37269	0.587562	0.4856	ns
RC	Helitron	HelitronY3_CE	No	130	5	0.364964	8.63263	0.630119	0.579198	0.2867	ns
LTR	Gypsy	CER5-LTR_CE	No	12	1	0.0729927	1.74399	0.127298	0.573398	1	ns
LTR	Pao	CER8-I_CE	No	17	1	0.0729927	1.76393	0.128754	0.566916	1	ns
DNA	TcMar-Mariner	Mariner2_CE	No	94	5	0.364964	8.969	0.654672	0.557476	0.2166	ns
DNA	TcMar-Pogo	CELETC2	No	334	15	1.09489	26.914	1.96453	0.557331	0.01529	*
LTR	Pao	CER7-I_CE	No	45	2	0.145985	3.67942	0.268571	0.543564	0.5827	ns
LINE	CR1	LINE2G_CE	No	112	6	0.437956	11.135	0.812774	0.538841	0.1146	ns
DNA	TcMar-Tc1	Tc3	No	237	11	0.80292	20.867	1.52314	0.527148	0.02128	*
DNA	PIF-Harbinger	TURMOIL1	YES	10	1	0.0729927	1.92818	0.140743	0.518623	0.6985	ns
LTR	LTR	LTR1_CE	No	22	1	0.0729927	1.93385	0.141157	0.517103	0.7166	ns
DNA	TcMar-Pogo	CELE12B	No	174	6	0.437956	11.612	0.847591	0.516707	0.09434	ns
DNA	TcMar-Pogo	CELE11	No	783	37	2.70073	72.335	5.27993	0.511509	3.21e-06	***
LTR	Gypsy	CER5-I_CE	No	20	1	0.0729927	1.95709	0.142853	0.510963	0.715	ns
DNA	hAT	TIR9TA1B_CE	No	563	18	1.31387	35.51	2.59197	0.506899	0.001277	**
DNA	TcMar-Tc4?	DNA-3-1_CE	No	203	9	0.656934	17.77	1.29708	0.506472	0.02513	*
DNA	TcMar-Tc1	Tc1A	No	275	10	0.729927	19.746	1.44131	0.506432	0.01906	*
DNA	TcMar-Pogo	CELE12A	No	376	11	0.80292	23.688	1.72905	0.46437	0.005407	**
LTR	Pao	CER9-LTR_CE	No	16	1	0.0729927	2.16108	0.157743	0.462731	0.7129	ns
DNA	DNA	TIR23T5A_CE	No	65	3	0.218978	6.81582	0.497505	0.440153	0.1546	ns
DNA	CMC-Chapaev	Chapaev-2_CE	No	63	3	0.218978	6.93882	0.506483	0.43235	0.155	ns
DNA	TcMar-Pogo	NTC2A	No	202	6	0.437956	14.312	1.04467	0.419229	0.0189	*
LINE	CR1	LINE2C_CE	No	56	2	0.145985	4.85368	0.354283	0.412058	0.2348	ns
DNA?	DNA?	NDNAX1_CE	No	79	3	0.218978	7.379	0.538613	0.406559	0.1181	ns
Unknown	Unknown	CeRep5	No	1320	52	3.79562	134.381	9.80883	0.386959	2.2e-16	***
DNA	TcMar-Tc1?	PALTA1_CE	YES	105	3	0.218978	7.833	0.571752	0.382995	0.0908	ns
DNA	TcMar-Mariner	Mariner5_CE	No	63	2	0.145985	5.28931	0.386081	0.378121	0.1719	ns
LINE	CR1	LINE2E_CE	No	37	1	0.0729927	2.66224	0.194324	0.375624	0.5188	ns
DNA	hAT	PAL8A_CE	YES	29	1	0.0729927	2.79087	0.203713	0.358311	0.5207	ns
DNA	PiggyBac?	PALTTAA2_CE	YES	1194	42	3.06569	123.457	9.01146	0.340199	2.2e-16	***
DNA?	DNA?	NDNAX2_CE	No	211	7	0.510949	20.98	1.53139	0.333651	0.0004797	***
DNA	TcMar-Tc1	PALTA5_CE	YES	1343	48	3.50365	146.078	10.6626	0.328592	2.2e-16	***
LINE	CR1	LINE2F_CE	No	38	1	0.0729927	3.22972	0.235746	0.309625	0.3732	ns
DNA	TcMar-Tc4	TC5B	No	131	3	0.218978	10.967	0.800511	0.273548	0.006827	**
DNA	TcMar-Tc1	Tc1	No	42	1	0.0729927	4.125	0.301095	0.242424	0.1219	ns
LINE	CR1	LINE2D_CE	No	47	1	0.0729927	4.17538	0.304773	0.239499	0.1239	ns
DNA?	DNA?	NDNAX3_CE	No	121	3	0.218978	12.969	0.946642	0.231321	0.001102	**
Unknown	Unknown	CeRep3	No	449	9	0.656934	40.865	2.98285	0.220237	1.099e-09	***
Unknown	Unknown	CeRep4	No	519	11	0.80292	52.965	3.86606	0.207684	7.82e-13	***
DNA	DNA	IR1_CE	No	118	2	0.145985	9.645	0.704015	0.207361	0.006173	**
DNA	MULE-MuDR	LONGPAL1	YES	60	1	0.0729927	5.26687	0.384443	0.189866	0.06251	ns
DNA	TcMar-Tc1	MARINCE1	No	85	1	0.0729927	6.18455	0.451427	0.161693	0.02085	*
LINE	RTE	RTE1	No	83	1	0.0729927	6.582	0.480438	0.15193	0.01411	*
DNA	MULE-MuDR	LONGPAL2	YES	129	2	0.145985	13.299	0.97073	0.150387	0.0002127	***
DNA	MULE-MuDR	LONGPAL3	YES	383	5	0.364964	37.4	2.72993	0.13369	1.947e-11	***
DNA	MULE-MuDR	CEMUDR2	No	41	0	0	4.21914	0.307966	0	0.0191	*
LTR	Pao	CER10-LTR_CE	No	10	0	0	1.38367	0.100998	0	0.3761	ns
LTR	Pao	CER11-I_CE	No	3	0	0	1.35433	0.0988563	0	0.2571	ns
LTR	Pao	CER12-I_CE	No	6	0	0	1.34588	0.0982396	0	0.3488	ns
LTR	Pao	CER13-I_CE	No	6	0	0	1.43556	0.104785	0	0.3466	ns
LTR	Pao	CER13-LTR_CE	No	3	0	0	1.12941	0.0824388	0	0.2958	ns
LTR	Pao	CER15-1-LTR_CE	No	7	0	0	1.54678	0.112903	0	0.36	ns
LTR	Pao	CER15-LTR_CE	No	4	0	0	1.42191	0.103789	0	0.3043	ns
LTR	Pao	CER16-1-LTR_CE	No	6	0	0	1.3931	0.101686	0	0.3472	ns
LTR	Pao	CER16-2-LTR_CE	No	10	0	0	1.76783	0.129039	0	0.2266	ns
LTR	Pao	CER16-LTR_CE	No	12	0	0	1.74322	0.127243	0	0.2358	ns
LTR	Pao	CER17-I_CE	No	5	0	0	1.30729	0.0954227	0	0.3357	ns
LTR	Pao	CER17-LTR_CE	No	1	0	0	1.18954	0.0868279	0	na	na
LTR	Gypsy	CER3-I_CE	No	4	0	0	1.23	0.089781	0	0.3195	ns
LTR	Gypsy	CER3-LTR_CE	No	5	0	0	1.40546	0.102588	0	0.331	ns
LTR	Gypsy	CER4-I_CE	No	1	0	0	1.08108	0.078911	0	na	na
LTR	Gypsy	CER4-LTR_CE	No	2	0	0	1.06202	0.0775194	0	0.22	ns
LTR	Gypsy	CER6-I_CE	No	7	0	0	1.45293	0.106053	0	0.3575	ns
LTR	Gypsy	CER6-LTR_CE	No	12	0	0	1.79346	0.13091	0	0.2346	ns
LTR	Pao	CER7-LTR_CE	No	5	0	0	1.425	0.104015	0	0.3307	ns
LTR	Pao	CER8-LTR_CE	No	7	0	0	1.48337	0.108275	0	0.3579	ns
LTR	Pao	CER9-I_CE	No	43	0	0	1.66	0.121168	0	0.4144	ns
DNA	hAT	HATN1_CE	YES	46	0	0	2.21097	0.161384	0	0.1726	ns
LINE	CR1	LINE2A_CE	No	40	0	0	3.49001	0.254745	0	0.04646	*
SINE	tRNA-Deu-L2	LmeSINE1c	No	4	0	0	1.26542	0.0923661	0	0.315	ns
DNA	TcMar-Mariner	Mariner4_CE	No	8	0	0	1.21184	0.0884553	0	0.6162	ns
LINE	R2	NeSL-1	No	36	0	0	4.31345	0.31485	0	0.0182	*
DNA	DNA	NPAL0A_CE	No	36	0	0	2.86069	0.20881	0	0.1132	ns
DNA	MULE-MuDR?	RC14	No	4	0	0	1.19853	0.0874839	0	0.324	ns
DNA	TcMar-Tc4	TC5	No	19	0	0	2.60894	0.190433	0	0.09728	ns
DNA	TcMar-Tc1	Tc6	No	37	0	0	3.97631	0.290242	0	0.02939	*
DNA	DNA	TIR43YW1_CE	No	22	0	0	2.61916	0.191179	0	0.1008	ns
DNA	PIF-Harbinger	TURMOIL2	YES	2	0	0	1.18182	0.0862641	0	0.1674	ns
LINE	Jockey	Vingi-1_CE	No	11	0	0	1.58179	0.115459	0	0.3839	ns
LINE	Jockey	Vingi-2_CE	No	18	0	0	2.30314	0.168112	0	0.1553	ns

## Sheet: Essential genes
652 total genes (essential genes on autosome distal arms only)
1000 randomized trials
The binomial test is done with binom.test from R, two sided
TE_class	TE_family	TE_name	Palindromic?	TEs_in_genome	#Genes overlapped	%Genes overlapped	#Genes expected to overlap	%Genes expected to overlap	Observed /Expected	Binomial test pval	Significance
DNA	DNA	PAL5A_CE	YES	352	55	8.43558	24.858	3.81258	2.21257	3.306e-08	***
LTR	Pao	CER8-I_CE	No	17	3	0.460123	1.43976	0.220822	2.08368	0.1698	ns
LTR	Pao	CER16-I_CE	No	4	2	0.306748	1.13919	0.174723	1.75563	0.3216	ns
DNA	TcMar-Tc1?	PALTA4_CE	YES	84	10	1.53374	6.07107	0.931146	1.64716	0.1337	ns
LTR	Pao	CER16-2-I_CE	No	7	2	0.306748	1.2322	0.188987	1.62312	0.3565	ns
DNA	PiggyBac?	IR3_CE	YES	225	21	3.22086	13.478	2.06718	1.55809	0.04714	*
LTR	Gypsy	CER1	No	20	3	0.460123	1.95641	0.300062	1.53342	0.4383	ns
DNA	CMC-Chapaev	Chapaev-1_CE	No	71	7	1.07362	4.58569	0.703326	1.52649	0.2253	ns
DNA	hAT?	PAL8D_CE	No	70	7	1.07362	4.70909	0.722253	1.48649	0.2365	ns
RC	Helitron	Helitron1_CE	No	343	33	5.06135	23.352	3.5816	1.41316	0.05241	ns
DNA	PiggyBac?	PALTTAA3_CE	YES	1391	76	11.6564	53.927	8.27101	1.40931	0.003437	**
DNA	hAT	PAL8C_4	No	80	5	0.766871	3.57276	0.547969	1.39948	0.409	ns
DNA	CMC-Chapaev?	NPAL5A_CE	No	149	14	2.14724	10.481	1.60752	1.33575	0.2597	ns
LTR	LTR	LTR2_CE	No	14	2	0.306748	1.5069	0.231119	1.32723	0.6571	ns
RC	Helitron	HelitronY1A_CE	No	1383	105	16.1043	79.889	12.2529	1.31432	0.005558	**
DNA	DNA	PALTTTAAA1	YES	466	35	5.3681	27.926	4.28313	1.25331	0.171	ns
DNA	DNA	PALTTTAAA3	YES	163	14	2.14724	11.179	1.71457	1.25235	0.3524	ns
DNA	TcMar-Tc1?	CELE1	YES	1553	126	19.3252	100.815	15.4624	1.24981	0.01153	*
DNA	DNA	CELE7	YES	839	61	9.35583	48.886	7.49785	1.2478	0.07679	ns
LTR	Pao	CER15-1-I_CE	No	60	6	0.920245	4.85256	0.744257	1.23646	0.4838	ns
DNA	DNA	PAL3A_CE	No	401	27	4.1411	21.838	3.34939	1.23638	0.2694	ns
DNA	DNA	TIR54TA1_CE	YES	115	7	1.07362	5.69789	0.873909	1.22853	0.5173	ns
DNA?	DNA?	CERP2	YES	326	27	4.1411	21.99	3.3727	1.22783	0.2684	ns
DNA	PiggyBac?	PALTTAA1_CE	YES	1192	74	11.3497	61.257	9.39525	1.20803	0.1006	ns
DNA	DNA	CELE46B	No	1076	57	8.74233	47.524	7.28896	1.19939	0.1584	ns
DNA	DNA	CELE4	No	767	60	9.20245	52.514	8.05429	1.14255	0.2831	ns
RC	Helitron	HelitronY1_CE	No	723	47	7.20859	42.215	6.47469	1.11335	0.4277	ns
DNA	CMC-Chapaev	Chapaev-2_CE	No	63	5	0.766871	4.51022	0.691752	1.10859	0.8045	ns
DNA	hAT	HAT4_CE	No	73	5	0.766871	4.72818	0.725182	1.05749	0.8113	ns
LINE	CR1	LINE2E_CE	No	37	2	0.306748	1.90743	0.292551	1.04853	0.7163	ns
DNA	DNA	NPALTA1_CE	No	254	15	2.30061	14.371	2.20414	1.04377	0.7864	ns
DNA	hAT	HAT3_CE	No	326	20	3.06748	19.578	3.00276	1.02155	0.907	ns
DNA	DNA	CELE2	YES	2868	168	25.7669	169.343	25.9729	0.992069	0.9684	ns
DNA	DNA	CELE42	No	940	64	9.81595	64.992	9.9681	0.984737	0.9488	ns
SINE	tRNA-RTE	CELE45	No	457	13	1.99387	13.72	2.10429	0.947522	1	ns
DNA	hAT	TIR9TA1C_CE	No	448	26	3.98773	28.131	4.31457	0.924247	0.77	ns
RC	Helitron	HelitronY4_CE	No	690	36	5.52147	38.956	5.97485	0.92412	0.6804	ns
LTR	Pao	CER10-I_CE	No	6	1	0.153374	1.0828	0.166074	0.923529	1	ns
DNA	DNA	CELE14A	No	616	33	5.06135	35.837	5.49647	0.920836	0.7302	ns
DNA	DNA	CERP4	No	401	15	2.30061	16.336	2.50552	0.918217	0.8991	ns
DNA	DNA	PALTTTAAA2	YES	797	38	5.82822	42.107	6.45813	0.902463	0.5792	ns
DNA	MULE-MuDR	PAL9A_CE	YES	78	4	0.613497	4.66297	0.715179	0.857823	1	ns
DNA	TcMar-Tc1?	PALTA1_CE	YES	105	4	0.613497	4.72965	0.725406	0.845729	1	ns
DNA	MULE-MuDR	CEMUDR1	No	429	18	2.76074	21.477	3.29402	0.838106	0.5069	ns
DNA	TcMar-Pogo	CELE12A	No	376	12	1.84049	14.679	2.25138	0.817494	0.5933	ns
Unknown	Unknown	LR9A	No	2015	90	13.8037	111.055	17.033	0.810409	0.04019	*
RC	Helitron	HelitronY2_CE	No	343	15	2.30061	18.592	2.85153	0.806799	0.4736	ns
DNA	TcMar-Tc4	TC5A	No	80	4	0.613497	4.96579	0.761625	0.805511	0.8188	ns
LTR	Gypsy	LTRCER1	No	17	1	0.153374	1.25118	0.1919	0.799242	1	ns
DNA	hAT	PAL8C_2	No	79	2	0.306748	2.56623	0.393593	0.779355	1	ns
DNA	DNA	CELE14B	No	2391	99	15.184	128.176	19.6589	0.772375	0.007322	**
Unknown	Unknown	CERP3	No	2661	116	17.7914	152.514	23.3917	0.760586	0.001751	**
DNA	hAT	PAL8C_5	No	61	2	0.306748	2.65705	0.407523	0.752715	1	ns
DNA	hAT	HAT1_CE	No	1524	63	9.66258	84.422	12.9482	0.746251	0.01587	*
DNA	hAT	PAL8C_1	No	67	2	0.306748	2.7244	0.417853	0.734106	1	ns
LTR	Gypsy	CER2-I_CE	No	9	1	0.153374	1.36681	0.209634	0.731629	1	ns
DNA	TcMar-Mariner	Mariner3_CE	No	69	3	0.460123	4.12942	0.633347	0.726494	0.7992	ns
LTR	Gypsy	CER6-LTR_CE	No	12	1	0.153374	1.39744	0.214331	0.715596	1	ns
DNA	TcMar-Pogo	CELETC2	No	334	12	1.84049	16.803	2.57715	0.714158	0.2606	ns
Unknown	Unknown	CERP16	No	1456	58	8.89571	81.75	12.5383	0.70948	0.006174	**
LTR	Pao	CER15-I_CE	No	9	1	0.153374	1.41	0.216258	0.70922	1	ns
DNA	DNA	IR4	No	120	5	0.766871	7.087	1.08696	0.705517	0.5604	ns
DNA	TcMar-Pogo	CELE12B	No	174	5	0.766871	7.101	1.08911	0.704126	0.5642	ns
LTR	Pao	CER16-LTR_CE	No	12	1	0.153374	1.43133	0.21953	0.698649	1	ns
LTR	Gypsy	CER5-LTR_CE	No	12	1	0.153374	1.46207	0.224244	0.683962	1	ns
DNA	TcMar-Tc4	TC4	No	195	6	0.920245	8.774	1.34571	0.683839	0.4862	ns
DNA	TcMar-Tc1?	PALTA3_CE	YES	287	8	1.22699	11.753	1.80261	0.680677	0.3683	ns
DNA	TcMar-Pogo	CELE11	No	783	30	4.60123	45.231	6.93727	0.663262	0.01738	*
Unknown	Unknown	CERP1	No	121	5	0.766871	7.579	1.16242	0.659718	0.4513	ns
DNA	PIF-Harbinger	Turmoil1	YES	10	1	0.153374	1.53146	0.234886	0.652973	1	ns
DNA?	DNA?	NDNAX1_CE	No	79	3	0.460123	4.68882	0.719144	0.63982	0.6312	ns
DNA	hAT	HAT2_CE	No	169	6	0.920245	9.696	1.48712	0.618812	0.3173	ns
DNA	TcMar-Tc1?	PALTA2_CE	YES	103	3	0.460123	5.28514	0.810604	0.567629	0.4974	ns
DNA	TcMar-Tc4	TC5	No	19	1	0.153374	1.80162	0.276322	0.555056	1	ns
LTR	Gypsy	CER3-1-LTR_CE	No	20	1	0.153374	1.86928	0.2867	0.534965	1	ns
SINE	R2?	SINE1_CE	No	61	2	0.306748	3.78243	0.580127	0.52876	0.5898	ns
DNA	DNA	TIR43YW1_CE	No	22	1	0.153374	1.91117	0.293124	0.52324	1	ns
DNA	hAT	TIR9TA1B_CE	No	563	11	1.68712	21.681	3.32531	0.507357	0.01555	*
RC	Helitron	Helitron2_CE	No	549	17	2.60736	34.725	5.32592	0.489561	0.001092	**
DNA	DNA	CELE46A	No	2148	37	5.67485	76.406	11.7187	0.484255	6.35e-07	***
DNA	CMC-Mirage	PALNN1_CE	YES	34	1	0.153374	2.06667	0.316973	0.483871	0.7214	ns
DNA	TcMar-Pogo	NTC2A	No	202	4	0.613497	8.79279	1.34859	0.454918	0.1181	ns
LINE	CR1	LINE2A_CE	No	40	1	0.153374	2.22844	0.341785	0.448745	0.7259	ns
DNA	TcMar-Tc1	Tc3	No	237	6	0.920245	13.394	2.05429	0.447962	0.03403	*
DNA	TcMar-Tc2	TC2	No	196	4	0.613497	8.996	1.37975	0.444642	0.1202	ns
LINE	CR1	LINE2B_CE	No	44	1	0.153374	2.31688	0.355349	0.431615	0.7295	ns
DNA	TcMar-Tc1?	CELE6	No	142	3	0.460123	7.01303	1.07562	0.427775	0.17	ns
DNA	DNA	TIR9TA1A_CE	No	57	1	0.153374	2.37444	0.364178	0.421152	0.7333	ns
DNA	hAT	PAL8C_3	No	116	2	0.306748	4.8429	0.742776	0.412976	0.2459	ns
Unknown	Unknown	CeRep5	No	1320	34	5.21472	82.819	12.7023	0.410534	6.7e-10	***
DNA	DNA	TIR9TA1_CE	No	356	6	0.920245	14.688	2.25276	0.408497	0.0158	*
DNA	TcMar-Tc1	Tc1A	No	275	5	0.766871	12.53	1.92178	0.399042	0.02842	*
DNA	TcMar-Tc1	Tc6	No	37	1	0.153374	2.60222	0.399114	0.384287	0.5169	ns
DNA	TcMar-Tc4?	DNA-3-1_CE	No	203	4	0.613497	10.947	1.67899	0.365397	0.02804	*
DNA	MULE-MuDR	LONGPAL2	YES	129	3	0.460123	8.303	1.27347	0.361315	0.0691	ns
LINE	CR1	LINE2C1_CE	No	49	1	0.153374	3.00749	0.461272	0.332503	0.3692	ns
DNA	DNA	TIR21T5A_CE	No	100	2	0.306748	6.042	0.926687	0.331016	0.09406	ns
DNA	MULE-MuDR	LONGPAL1	YES	60	1	0.153374	3.20959	0.492269	0.311566	0.3793	ns
DNA	CMC-Mirage	MIRAGE1	No	61	1	0.153374	3.23406	0.496022	0.309208	0.3808	ns
DNA	PiggyBac?	PALTTAA2_CE	YES	1194	22	3.37423	73.205	11.2278	0.300526	1.388e-12	***
DNA	TcMar-Tc4	TC5B	No	131	2	0.306748	6.799	1.04279	0.294161	0.07165	ns
LINE	CR1	LINE2G_CE	No	112	2	0.306748	6.817	1.04555	0.293384	0.0706	ns
DNA	MULE-MuDR	CeRep1A	No	40	1	0.153374	3.51179	0.538619	0.284755	0.2575	ns
DNA	TcMar-Mariner	Mariner5_CE	No	63	1	0.153374	3.58564	0.549945	0.27889	0.2678	ns
Unknown	Unknown	CeRep4	No	519	9	1.38037	33.118	5.07945	0.271756	8.718e-07	***
DNA	TcMar-Tc1	PALTA5_CE	YES	1343	24	3.68098	91.083	13.9698	0.263496	2.2e-16	***
DNA	TcMar-Tc1	MARINCE1	No	85	1	0.153374	3.85408	0.591117	0.259465	0.1888	ns
DNA?	DNA?	NDNAX3_CE	No	121	2	0.306748	7.734	1.1862	0.258598	0.02509	*
DNA	DNA	TIR23T5A_CE	No	65	1	0.153374	4.07622	0.625187	0.245325	0.1914	ns
DNA?	DNA?	NDNAX2_CE	No	211	3	0.460123	12.714	1.95	0.23596	0.002055	**
Unknown	Unknown	CeRep3	No	449	6	0.920245	27.143	4.16304	0.221051	1.362e-06	***
RC	Helitron	HelitronY3_CE	No	130	1	0.153374	5.44165	0.834609	0.183768	0.04678	*
DNA	TcMar-Mariner	Mariner2_CE	No	94	1	0.153374	5.58392	0.856429	0.179086	0.04566	*
DNA	MULE-MuDR	LONGPAL3	YES	383	2	0.306748	23.167	3.55322	0.0863297	2.224e-08	***
DNA	MULE-MuDR	CEMUDR2	No	41	0	0	2.80088	0.429582	0	0.1134	ns
LTR	Pao	CER10-LTR_CE	No	10	0	0	1.22319	0.187606	0	0.622	ns
LTR	Pao	CER11-I_CE	No	3	0	0	1.17361	0.180002	0	0.2855	ns
LTR	Pao	CER12-1-LTR_CE	No	8	0	0	1.20328	0.184552	0	0.6156	ns
LTR	Pao	CER12-I_CE	No	6	0	0	1.19805	0.18375	0	0.6066	ns
LTR	Pao	CER12-LTR_CE	No	12	0	0	1.28325	0.196818	0	0.6302	ns
LTR	Pao	CER13-I_CE	No	6	0	0	1.21791	0.186796	0	0.6083	ns
LTR	Pao	CER13-LTR_CE	No	3	0	0	1.06186	0.162861	0	0.5568	ns
LTR	Pao	CER15-1-LTR_CE	No	7	0	0	1.25893	0.193087	0	0.3648	ns
LTR	Pao	CER15-LTR_CE	No	4	0	0	1.1885	0.182285	0	0.3256	ns
LTR	Pao	CER16-1-LTR_CE	No	6	0	0	1.20767	0.185225	0	0.6074	ns
LTR	Pao	CER16-2-LTR_CE	No	10	0	0	1.47047	0.225533	0	0.376	ns
LTR	Pao	CER17-I_CE	No	5	0	0	1.1055	0.169556	0	0.5931	ns
LTR	Pao	CER17-LTR_CE	No	1	0	0	1.10843	0.170005	0	na	na
LTR	Pao	CER2-1-LTR_CE	No	8	0	0	1.16611	0.178852	0	0.6129	ns
LTR	Gypsy	CER2-LTR_CE	No	6	0	0	1.24409	0.190812	0	0.3561	ns
LTR	Gypsy	CER3-I_CE	No	4	0	0	1.1393	0.17474	0	0.5833	ns
LTR	Gypsy	CER3-LTR_CE	No	5	0	0	1.22393	0.187719	0	0.3438	ns
LTR	Gypsy	CER4-I_CE	No	1	0	0	1.04598	0.160426	0	na	na
LTR	Gypsy	CER4-LTR_CE	No	2	0	0	1.04	0.159509	0	0.2304	ns
LTR	Gypsy	CER5-I_CE	No	20	0	0	1.5099	0.23158	0	0.3966	ns
LTR	Gypsy	CER6-I_CE	No	7	0	0	1.3119	0.201212	0	0.361	ns
LTR	Pao	CER7-I_CE	No	45	0	0	2.39798	0.367789	0	0.1751	ns
LTR	Pao	CER7-LTR_CE	No	5	0	0	1.25217	0.192051	0	0.3406	ns
LTR	Pao	CER8-LTR_CE	No	7	0	0	1.17557	0.180303	0	0.6099	ns
LTR	Pao	CER9-I_CE	No	43	0	0	1.33251	0.204372	0	0.6448	ns
LTR	Pao	CER9-LTR_CE	No	16	0	0	1.642	0.25184	0	0.3989	ns
DNA	hAT	HATN1_CE	YES	46	0	0	1.6233	0.248972	0	0.4124	ns
DNA	DNA	IR1_CE	No	118	0	0	5.8018	0.889847	0	0.004642	**
LINE	CR1	LINE2C_CE	No	56	0	0	2.97028	0.455564	0	0.07534	ns
LINE	CR1	LINE2D_CE	No	47	0	0	2.69537	0.413401	0	0.1132	ns
LINE	CR1	LINE2F_CE	No	38	0	0	2.18399	0.334968	0	0.1705	ns
LINE	CR1	LINE2H_CE	No	29	0	0	2.21712	0.340049	0	0.1661	ns
SINE	tRNA-Deu-L2	LmeSINE1c	No	4	0	0	1.14103	0.175004	0	0.5834	ns
LTR	LTR	LTR1_CE	No	22	0	0	1.55963	0.239208	0	0.4003	ns
DNA	TcMar-Mariner	MAR_CE	No	53	0	0	2.57033	0.394222	0	0.1851	ns
DNA	TcMar-Mariner	Mariner4_CE	No	8	0	0	1.08796	0.166865	0	0.609	ns
DNA	Merlin	Merlin1m_CE	No	8	0	0	1.27604	0.195712	0	0.3708	ns
LINE	R2	NeSL-1	No	36	0	0	2.89355	0.443796	0	0.1142	ns
DNA	DNA	NPAL0A_CE	No	36	0	0	2.19088	0.336024	0	0.1697	ns
DNA	hAT	PAL8A_CE	YES	29	0	0	2.12943	0.326599	0	0.2699	ns
DNA	hAT	PAL8B_CE	YES	22	0	0	1.61573	0.247812	0	0.4034	ns
DNA	MULE-MuDR?	RC14	No	4	0	0	1.06164	0.162829	0	0.5792	ns
LINE	RTE	RTE1	No	83	0	0	3.98672	0.61146	0	0.03497	*
DNA	TcMar-Tc1	Tc1	No	42	0	0	2.5732	0.394662	0	0.1119	ns
Unknown	Unknown	TR5	No	3	0	0	1.12308	0.172251	0	0.2974	ns
DNA	PIF-Harbinger	Turmoil2	YES	2	0	0	1.23214	0.188979	0	0.1474	ns
LINE	Jockey	Vingi-1_CE	No	11	0	0	1.31311	0.201397	0	0.3821	ns
LINE	Jockey	Vingi-2_CE	No	18	0	0	1.7423	0.267223	0	0.2494	ns
