# Supplementary material
Source: HighWire-hosted journal article supplement (doi:10.1101/rna.067405.118)
Supplement: Supplemental_File_S6.xlsx [file Supplemental_File_S6.xlsx]

## Sheet: Key
This file provides the coordinates of regions that met or exceeded the 5-read coverage threshold in RNAseq datasets used in (Reich et al. 2018) to define EERs. If a region occurs here, it does not mean that region contains an EER.
Column	Description
Chr	Chromosome where the region occurs.
Start	Start coordinate.
Stop	End coordinate.
Strand	Strand on which the region occurs.

## Sheet: Regions >= 5 reads
Chromosome	Start	Stop	Strand
chrX	5359	5365	-
chrX	7686	7802	-
chrX	8047	8249	-
chrX	8947	9224	-
chrX	9228	9243	-
chrX	9861	9967	-
chrX	10292	10438	-
chrX	10443	10669	-
chrX	10676	10690	-
chrX	10706	10715	-
chrX	10758	10776	-
chrX	10779	10947	-
chrX	11138	11288	-
chrX	20987	21004	-
chrX	21006	21079	-
chrX	21130	21144	-
chrX	21145	21147	-
chrX	21213	21348	-
chrX	21574	21599	-
chrX	24936	24948	-
chrX	24962	24992	-
chrX	25029	25062	-
chrX	32481	32578	-
chrX	32717	32833	-
chrX	32844	32850	-
chrX	32852	32854	-
chrX	34145	34184	-
chrX	34187	34229	-
chrX	34278	34304	-
chrX	34327	34328	-
chrX	34390	34430	-
chrX	42758	42874	-
chrX	42891	42920	-
chrX	42949	43014	-
chrX	43295	43554	-
chrX	44234	44707	-
chrX	44762	44960	-
chrX	45640	45689	-
chrX	45690	45716	-
chrX	45920	45941	-
chrX	46105	46261	-
chrX	46347	46715	-
chrX	46766	46919	-
chrX	47396	47406	-
chrX	84039	84160	-
chrX	84217	84380	-
chrX	85781	85787	-
chrX	85801	85857	-
chrX	86323	86346	-
chrX	86808	86908	-
chrX	86941	86949	-
chrX	86951	87097	-
chrX	87408	87510	-
chrX	87542	87574	-
chrX	89043	89143	-
chrX	90093	90157	-
chrX	90158	90219	-
chrX	90311	90343	-
chrX	90987	91006	-
chrX	91027	91034	-
chrX	91039	91061	-
chrX	91083	91085	-
chrX	91135	91186	-
chrX	91221	91270	-
chrX	91615	91621	-
chrX	92228	92345	-
chrX	93470	93706	-
chrX	94219	94317	-
chrX	94319	94354	-
chrX	94749	94851	-
chrX	95687	95836	-
chrX	97556	97644	-
chrX	97839	97855	-
chrX	97897	97962	-
chrX	99059	99288	-
chrX	99367	99482	-
chrX	100759	101019	-
chrX	101688	101795	-
chrX	102897	103411	-
chrX	104618	104777	-
chrX	149669	149725	-
chrX	149733	149872	-
chrX	149875	149879	-
chrX	149892	150420	-
chrX	150468	150535	-
chrX	150587	150905	-
chrX	151111	151279	-
chrX	151450	151452	-
chrX	151463	151658	-
chrX	151705	151979	-
chrX	152189	152197	-
chrX	152216	152274	-
chrX	152328	152560	-
chrX	153850	154143	-
chrX	154189	154258	-
chrX	154338	154487	-
chrX	154707	155060	-
chrX	155115	155268	-
chrX	155321	155399	-
chrX	155497	155624	-
chrX	156928	157020	-
chrX	157162	157322	-
chrX	158201	158428	-
chrX	158785	158821	-
chrX	159073	159393	-
chrX	159538	159714	-
chrX	159967	160109	-
chrX	160211	160230	-
chrX	160759	160924	-
chrX	162450	162458	-
chrX	162557	162624	-
chrX	162646	162813	-
chrX	162864	162969	-
chrX	163020	163138	-
chrX	165873	165996	-
chrX	166023	166119	-
chrX	179892	179936	-
chrX	180131	180143	-
chrX	180169	180197	-
chrX	181782	181934	-
chrX	182043	182164	-
chrX	295619	295680	-
chrX	299983	300076	-
chrX	308774	309016	-
chrX	311162	311303	-
chrX	313458	313463	-
chrX	313488	313512	-
chrX	313595	313603	-
chrX	325215	325271	-
chrX	325277	325430	-
chrX	335165	335233	-
chrX	335256	335258	-
chrX	335303	335435	-
chrX	335743	335822	-
chrX	336284	336465	-
chrX	337237	337518	-
chrX	337545	337560	-
chrX	337734	337789	-
chrX	338720	338854	-
chrX	339076	339201	-
chrX	340665	340862	-
chrX	341080	341228	-
chrX	341819	341867	-
chrX	342053	342269	-
chrX	342660	342714	-
chrX	342756	342761	-
chrX	342878	343008	-
chrX	343024	343048	-
chrX	343175	343281	-
chrX	343302	343575	-
chrX	343638	343766	-
chrX	344167	344289	-
chrX	344290	344296	-
chrX	344314	344408	-
chrX	344596	344598	-
chrX	344599	344638	-
chrX	344644	344803	-
chrX	344846	345263	-
chrX	346067	346285	-
chrX	346679	346781	-
chrX	347146	347205	-
chrX	347509	347512	-
chrX	347643	348034	-
chrX	377502	377650	-
chrX	378285	378396	-
chrX	378440	378510	-
chrX	378936	379016	-
chrX	379034	379036	-
chrX	379060	379111	-
chrX	379176	379375	-
chrX	379418	379576	-
chrX	380083	380188	-
chrX	380324	380569	-
chrX	381098	381111	-
chrX	381132	381221	-
chrX	381392	381735	-
chrX	381858	381957	-
chrX	381961	381967	-
chrX	382069	382301	-
chrX	382375	382551	-
chrX	382627	382752	-
chrX	384494	384538	-
chrX	384585	384594	-
chrX	384935	384993	-
chrX	385299	385797	-
chrX	386715	386830	-
chrX	386886	387239	-
chrX	387771	387937	-
chrX	388409	388562	-
chrX	388607	388688	-
chrX	388735	388800	-
chrX	389536	389724	-
chrX	389838	389934	-
chrX	390212	390263	-
chrX	390345	390429	-
chrX	390486	390556	-
chrX	391639	391688	-
chrX	392370	392391	-
chrX	392412	392631	-
chrX	392634	393124	-
chrX	393135	393160	-
chrX	393202	393394	-
chrX	394431	394585	-
chrX	394751	394820	-
chrX	406542	406652	-
chrX	407542	407711	-
chrX	407766	407966	-
chrX	408015	408155	-
chrX	409132	409505	-
chrX	409592	409726	-
chrX	409832	409942	-
chrX	410543	411079	-
chrX	411146	411298	-
chrX	412092	412329	-
chrX	412438	412627	-
chrX	413457	413610	-
chrX	413653	413689	-
chrX	414427	414525	-
chrX	414672	414832	-
chrX	414878	415100	-
chrX	415811	416209	-
chrX	416252	416666	-
chrX	416722	416875	-
chrX	417432	417529	-
chrX	417653	417706	-
chrX	417750	417883	-
chrX	418160	418248	-
chrX	418445	418821	-
chrX	419153	419305	-
chrX	419730	420046	-
chrX	422238	422600	-
chrX	422949	423096	-
chrX	423143	423223	-
chrX	423477	423729	-
chrX	423826	424074	-
chrX	425000	425190	-
chrX	425529	425631	-
chrX	427097	427771	-
chrX	427821	428000	-
chrX	428540	428688	-
chrX	428731	428811	-
chrX	428816	428824	-
chrX	428828	428837	-
chrX	428859	428928	-
chrX	428993	429293	-
chrX	429343	429507	-
chrX	431201	431224	-
chrX	431258	431288	-
chrX	431874	431984	-
chrX	432036	432151	-
chrX	432188	432373	-
chrX	432579	432600	-
chrX	432622	432679	-
chrX	432692	432832	-
chrX	432845	432972	-
chrX	433272	433289	-
chrX	433291	433377	-
chrX	433612	433802	-
chrX	440442	440583	-
chrX	446421	446446	-
chrX	446493	446550	-
chrX	447476	447496	-
chrX	447514	447542	-
chrX	447840	447915	-
chrX	448568	448613	-
chrX	448736	448922	-
chrX	450527	450616	-
chrX	450617	450665	-
chrX	450862	450935	-
chrX	450941	450965	-
chrX	450977	450990	-
chrX	451647	451876	-
chrX	451880	452006	-
chrX	452067	452123	-
chrX	452367	452505	-
chrX	452564	452595	-
chrX	452622	452630	-
chrX	452673	452677	-
chrX	452765	452919	-
chrX	454006	454012	-
chrX	454013	454196	-
chrX	454286	454483	-
chrX	455464	455581	-
chrX	455631	455924	-
chrX	455975	456092	-
chrX	456137	456233	-
chrX	457309	457532	-
chrX	461886	462011	-
chrX	489828	489871	-
chrX	501968	502497	-
chrX	502902	503032	-
chrX	503087	503308	-
chrX	503609	503654	-
chrX	503655	503755	-
chrX	505292	505552	-
chrX	505787	505976	-
chrX	506111	506184	-
chrX	506776	506950	-
chrX	512594	512631	-
chrX	512633	512745	-
chrX	512747	513123	-
chrX	518531	518630	-
chrX	525986	526047	-
chrX	526077	526285	-
chrX	526517	526605	-
chrX	526652	526766	-
chrX	526812	526924	-
chrX	526967	527040	-
chrX	527838	528161	-
chrX	528210	528407	-
chrX	529481	529710	-
chrX	529754	529874	-
chrX	529992	530197	-
chrX	530557	530844	-
chrX	530893	530990	-
chrX	531957	532069	-
chrX	532195	532327	-
chrX	534434	534501	-
chrX	534555	534649	-
chrX	534972	535110	-
chrX	549582	549816	-
chrX	549865	550066	-
chrX	551028	551205	-
chrX	551273	551368	-
chrX	553299	553449	-
chrX	553495	553548	-
chrX	563760	563956	-
chrX	564399	564479	-
chrX	564489	564577	-
chrX	564619	564728	-
chrX	564774	565234	-
chrX	565283	565538	-
chrX	565587	565665	-
chrX	566220	566376	-
chrX	566424	566579	-
chrX	566629	567115	-
chrX	567760	567988	-
chrX	568034	568176	-
chrX	568227	568598	-
chrX	568645	569207	-
chrX	569890	570550	-
chrX	570653	570910	-
chrX	570955	571079	-
chrX	571123	571306	-
chrX	572599	572668	-
chrX	573656	573700	-
chrX	576364	576616	-
chrX	576667	576847	-
chrX	576991	577127	-
chrX	577378	577390	-
chrX	578030	578063	-
chrX	578102	578211	-
chrX	578257	578717	-
chrX	578958	579093	-
chrX	579138	579260	-
chrX	579310	579391	-
chrX	579468	579654	-
chrX	579669	579671	-
chrX	579696	579718	-
chrX	579988	580144	-
chrX	580282	580652	-
chrX	580660	580685	-
chrX	580834	581045	-
chrX	581143	581246	-
chrX	581251	581321	-
chrX	581329	581352	-
chrX	581380	581392	-
chrX	581630	581785	-
chrX	582172	582682	-
chrX	582737	582965	-
chrX	583010	583152	-
chrX	583193	583571	-
chrX	583635	583870	-
chrX	583915	584242	-
chrX	584286	584946	-
chrX	585619	585879	-
chrX	585924	586048	-
chrX	586204	586388	-
chrX	586445	586528	-
chrX	586542	586546	-
chrX	587139	587353	-
chrX	587369	587489	-
chrX	588377	588439	-
chrX	588468	588490	-
chrX	588503	588555	-
chrX	591839	591843	-
chrX	593181	593254	-
chrX	596755	596782	-
chrX	596846	596859	-
chrX	598879	598958	-
chrX	599261	599379	-
chrX	599441	599463	-
chrX	603298	603452	-
chrX	604978	605216	-
chrX	607172	607301	-
chrX	607350	607428	-
chrX	607477	607651	-
chrX	608364	608494	-
chrX	611126	611615	-
chrX	612354	612384	-
chrX	612707	612847	-
chrX	613447	613529	-
chrX	613780	613906	-
chrX	613954	614072	-
chrX	614558	614649	-
chrX	614726	614809	-
chrX	616982	617120	-
chrX	617174	617298	-
chrX	620324	620473	-
chrX	621179	621292	-
chrX	633840	633861	-
chrX	635007	635088	-
chrX	635102	635104	-
chrX	635109	635119	-
chrX	635215	635220	-
chrX	636528	636543	-
chrX	636570	636624	-
chrX	636671	636673	-
chrX	636687	636743	-
chrX	636838	636923	-
chrX	642198	642242	-
chrX	642289	642400	-
chrX	642527	642611	-
chrX	642670	642742	-
chrX	642793	642903	-
chrX	643186	643254	-
chrX	643277	644052	-
chrX	644100	644259	-
chrX	644307	644475	-
chrX	644526	645021	-
chrX	645107	645218	-
chrX	645371	645774	-
chrX	646204	646284	-
chrX	646301	646307	-
chrX	646356	647016	-
chrX	647285	647377	-
chrX	647473	647726	-
chrX	647771	647890	-
chrX	648362	648549	-
chrX	648787	649004	-
chrX	649053	649164	-
chrX	649370	649506	-
chrX	650025	650107	-
chrX	652100	652132	-
chrX	652978	653081	-
chrX	654554	654652	-
chrX	654788	654872	-
chrX	658540	658729	-
chrX	658776	658844	-
chrX	659272	659327	-
chrX	660595	660613	-
chrX	661158	661162	-
chrX	661168	661293	-
chrX	661539	661606	-
chrX	661650	661718	-
chrX	664777	664865	-
chrX	664896	664913	-
chrX	665027	665037	-
chrX	665105	665168	-
chrX	666026	666035	-
chrX	666053	666185	-
chrX	670141	670183	-
chrX	670227	670363	-
chrX	670529	670536	-
chrX	670566	670608	-
chrX	676537	676595	-
chrX	677589	677660	-
chrX	677679	677684	-
chrX	677881	677885	-
chrX	679648	679740	-
chrX	680256	680269	-
chrX	680526	680679	-
chrX	680988	681094	-
chrX	681100	681277	-
chrX	681333	681353	-
chrX	681354	681425	-
chrX	681427	681435	-
chrX	681816	681887	-
chrX	681961	681980	-
chrX	682019	682047	-
chrX	682100	682222	-
chrX	682391	682499	-
chrX	682557	682667	-
chrX	685433	685553	-
chrX	685563	685591	-
chrX	703882	703981	-
chrX	704045	704049	-
chrX	704391	704398	-
chrX	706491	706583	-
chrX	706632	706666	-
chrX	706669	706677	-
chrX	708652	708672	-
chrX	708724	708804	-
chrX	709903	709920	-
chrX	720362	720922	-
chrX	721567	721601	-
chrX	721709	721734	-
chrX	722151	722260	-
chrX	722334	722508	-
chrX	722846	722901	-
chrX	723162	723382	-
chrX	723431	723701	-
chrX	724093	724243	-
chrX	724296	724589	-
chrX	724633	724634	-
chrX	724663	724750	-
chrX	725137	725266	-
chrX	725404	725480	-
chrX	725534	725644	-
chrX	725648	725780	-
chrX	725826	725958	-
chrX	726262	726279	-
chrX	726761	726872	-
chrX	726880	726889	-
chrX	726934	726936	-
chrX	727168	727279	-
chrX	727288	727289	-
chrX	727299	727325	-
chrX	727353	727398	-
chrX	734699	734839	-
chrX	734888	734926	-
chrX	735360	735374	-
chrX	735429	735465	-
chrX	744377	744494	-
chrX	751226	751396	-
chrX	751539	751603	-
chrX	751625	751658	-
chrX	751695	751716	-
chrX	752763	752957	-
chrX	753096	753143	-
chrX	753193	753308	-
chrX	753613	753916	-
chrX	754685	754961	-
chrX	755324	755364	-
chrX	755389	755424	-
chrX	755456	755584	-
chrX	755623	755625	-
chrX	755627	755634	-
chrX	755637	755686	-
chrX	755713	755717	-
chrX	755720	755735	-
chrX	755900	756095	-
chrX	756147	756331	-
chrX	756407	756655	-
chrX	756746	757114	-
chrX	757164	757312	-
chrX	757362	757662	-
chrX	757709	757832	-
chrX	757938	758164	-
chrX	758335	758344	-
chrX	758354	758362	-
chrX	758379	758451	-
chrX	758640	758657	-
chrX	758926	758978	-
chrX	759050	759228	-
chrX	759471	759711	-
chrX	767031	767435	-
chrX	767539	768161	-
chrX	807039	807153	-
chrX	807207	807422	-
chrX	807587	807804	-
chrX	807833	807975	-
chrX	808300	808530	-
chrX	808580	808603	-
chrX	809051	809267	-
chrX	809316	809436	-
chrX	809486	809574	-
chrX	809868	809942	-
chrX	810020	810295	-
chrX	810394	810514	-
chrX	810562	810731	-
chrX	811334	811352	-
chrX	811400	811598	-
chrX	811640	811705	-
chrX	811708	811845	-
chrX	812149	812215	-
chrX	812263	812391	-
chrX	812437	812525	-
chrX	812602	812657	-
chrX	812913	813029	-
chrX	813072	813104	-
chrX	813949	814198	-
chrX	814258	814423	-
chrX	814471	814948	-
chrX	815088	815173	-
chrX	815223	815321	-
chrX	815364	815478	-
chrX	815700	815930	-
chrX	817961	818424	-
chrX	818872	818885	-
chrX	819002	819139	-
chrX	819187	819494	-
chrX	819697	819869	-
chrX	820201	820254	-
chrX	820298	820420	-
chrX	820599	820730	-
chrX	822020	822681	-
chrX	822851	822977	-
chrX	823171	823411	-
chrX	823457	823609	-
chrX	823656	823812	-
chrX	824066	824168	-
chrX	824771	824958	-
chrX	825072	825261	-
chrX	825400	825474	-
chrX	827496	827578	-
chrX	838152	838398	-
chrX	838707	838869	-
chrX	838917	839006	-
chrX	839061	839139	-
chrX	840643	840708	-
chrX	840788	840901	-
chrX	841344	841498	-
chrX	845786	845987	-
chrX	846042	846142	-
chrX	846209	846210	-
chrX	846213	846224	-
chrX	846460	846581	-
chrX	846600	846711	-
chrX	846761	846897	-
chrX	846949	847130	-
chrX	847274	847490	-
chrX	847710	848568	-
chrX	848617	848773	-
chrX	848821	849044	-
chrX	849091	849234	-
chrX	849368	849479	-
chrX	849508	849765	-
chrX	849840	849924	-
chrX	849971	850083	-
chrX	850884	851084	-
chrX	851229	851386	-
chrX	851436	851506	-
chrX	862268	862571	-
chrX	862618	862745	-
chrX	862827	862979	-
chrX	863030	863214	-
chrX	863222	863254	-
chrX	863380	863583	-
chrX	863715	864025	-
chrX	864036	864062	-
chrX	864135	864424	-
chrX	865069	865205	-
chrX	865604	865611	-
chrX	865617	865629	-
chrX	865785	865917	-
chrX	866121	866354	-
chrX	866505	866763	-
chrX	866942	867062	-
chrX	867134	867325	-
chrX	867328	867435	-
chrX	867483	867539	-
chrX	867592	867714	-
chrX	868291	868533	-
chrX	868591	868754	-
chrX	868845	868982	-
chrX	869127	869324	-
chrX	869370	869609	-
chrX	869956	870067	-
chrX	870421	870659	-
chrX	870910	871057	-
chrX	883217	883357	-
chrX	883975	884109	-
chrX	884156	884414	-
chrX	884460	884534	-
chrX	884580	884646	-
chrX	885524	885555	-
chrX	885677	885688	-
chrX	885708	885713	-
chrX	885739	885838	-
chrX	885932	885990	-
chrX	886038	886062	-
chrX	886071	886230	-
chrX	886554	886667	-
chrX	886668	886672	-
chrX	886721	886835	-
chrX	887592	887791	-
chrX	888025	888126	-
chrX	888181	888279	-
chrX	888319	888444	-
chrX	892229	892346	-
chrX	892483	892519	-
chrX	892573	892671	-
chrX	892722	892728	-
chrX	892987	893053	-
chrX	893180	893217	-
chrX	893532	893711	-
chrX	893712	893713	-
chrX	893949	894056	-
chrX	894517	894523	-
chrX	894526	894592	-
chrX	894617	894626	-
chrX	894865	895064	-
chrX	895185	895278	-
chrX	895628	895950	-
chrX	896280	896424	-
chrX	897881	898071	-
chrX	920218	920489	-
chrX	921253	921379	-
chrX	921434	921634	-
chrX	921689	921916	-
chrX	922008	922197	-
chrX	922244	922373	-
chrX	922476	922707	-
chrX	922728	922733	-
chrX	922756	922872	-
chrX	923387	923590	-
chrX	923637	923698	-
chrX	923701	923755	-
chrX	923802	923926	-
chrX	924354	924511	-
chrX	944863	945199	-
chrX	945283	945397	-
chrX	945797	945974	-
chrX	946041	946191	-
chrX	946668	946875	-
chrX	947505	947729	-
chrX	948763	948882	-
chrX	949231	949520	-
chrX	954525	954712	-
chrX	960596	960759	-
chrX	961614	961781	-
chrX	961836	961874	-
chrX	961881	961915	-
chrX	961982	961987	-
chrX	961997	962024	-
chrX	962026	962027	-
chrX	962030	962072	-
chrX	963018	963092	-
chrX	963135	963250	-
chrX	969092	969377	-
chrX	970035	970203	-
chrX	970693	970772	-
chrX	970961	971111	-
chrX	971157	971280	-
chrX	971631	971738	-
chrX	971787	971880	-
chrX	972217	972369	-
chrX	972401	972491	-
chrX	972538	973034	-
chrX	973284	973322	-
chrX	973604	973808	-
chrX	973954	974019	-
chrX	974066	974265	-
chrX	974656	974785	-
chrX	975633	975900	-
chrX	976163	976230	-
chrX	976278	976426	-
chrX	976711	976888	-
chrX	976938	977268	-
chrX	977708	977875	-
chrX	977921	978011	-
chrX	983223	983419	-
chrX	984503	984835	-
chrX	985188	985287	-
chrX	985334	985418	-
chrX	985823	985970	-
chrX	986016	986142	-
chrX	986186	986519	-
chrX	986781	986830	-
chrX	987236	987646	-
chrX	987697	987845	-
chrX	988212	988278	-
chrX	988286	988556	-
chrX	988605	988623	-
chrX	988627	988729	-
chrX	988929	989048	-
chrX	989477	989637	-
chrX	989682	989814	-
chrX	990310	990399	-
chrX	990452	990635	-
chrX	991075	991205	-
chrX	991313	991452	-
chrX	1012840	1013308	-
chrX	1014053	1014166	-
chrX	1014174	1014177	-
chrX	1015296	1015436	-
chrX	1016047	1016146	-
chrX	1016318	1016436	-
chrX	1016484	1016628	-
chrX	1016964	1017066	-
chrX	1017134	1017566	-
chrX	1018704	1018767	-
chrX	1018791	1018868	-
chrX	1021165	1021206	-
chrX	1021248	1021276	-
chrX	1021277	1021278	-
chrX	1021287	1021348	-
chrX	1023568	1023621	-
chrX	1023672	1023787	-
chrX	1027805	1027876	-
chrX	1027880	1028232	-
chrX	1028374	1028508	-
chrX	1028586	1028772	-
chrX	1029017	1029151	-
chrX	1029365	1029831	-
chrX	1030026	1030028	-
chrX	1030063	1030124	-
chrX	1030145	1030151	-
chrX	1030153	1030323	-
chrX	1030324	1030327	-
chrX	1030501	1030904	-
chrX	1030951	1030984	-
chrX	1030992	1031009	-
chrX	1031050	1031169	-
chrX	1032108	1032130	-
chrX	1034043	1034151	-
chrX	1034198	1034313	-
chrX	1034363	1034501	-
chrX	1034936	1035044	-
chrX	1035066	1035229	-
chrX	1037850	1037976	-
chrX	1038331	1038402	-
chrX	1038646	1038736	-
chrX	1038805	1038899	-
chrX	1038953	1039028	-
chrX	1039751	1039847	-
chrX	1039896	1040093	-
chrX	1040153	1040319	-
chrX	1040561	1040721	-
chrX	1040768	1040916	-
chrX	1041055	1041129	-
chrX	1041183	1041410	-
chrX	1041449	1041489	-
chrX	1041684	1041843	-
chrX	1043252	1043301	-
chrX	1043311	1043330	-
chrX	1043345	1043352	-
chrX	1044087	1044113	-
chrX	1044124	1044253	-
chrX	1044278	1044349	-
chrX	1044542	1044628	-
chrX	1045450	1045535	-
chrX	1045593	1045667	-
chrX	1045939	1046205	-
chrX	1048914	1049053	-
chrX	1057518	1057903	-
chrX	1058067	1058282	-
chrX	1058958	1059232	-
chrX	1059290	1059415	-
chrX	1060568	1060682	-
chrX	1062298	1062444	-
chrX	1067004	1067056	-
chrX	1067058	1067061	-
chrX	1067569	1067572	-
chrX	1067576	1067664	-
chrX	1067706	1067803	-
chrX	1068353	1068517	-
chrX	1068973	1069030	-
chrX	1079505	1079640	-
chrX	1079692	1079816	-
chrX	1079862	1079910	-
chrX	1080511	1080646	-
chrX	1084307	1084620	-
chrX	1084980	1085134	-
chrX	1085184	1085342	-
chrX	1085441	1085766	-
chrX	1085929	1085930	-
chrX	1086350	1086484	-
chrX	1086592	1086830	-
chrX	1086840	1086850	-
chrX	1086936	1086940	-
chrX	1087304	1087314	-
chrX	1087347	1087491	-
chrX	1087691	1087792	-
chrX	1087844	1087998	-
chrX	1088050	1088147	-
chrX	1089619	1089660	-
chrX	1089931	1090098	-
chrX	1090102	1090108	-
chrX	1090342	1090495	-
chrX	1093091	1093107	-
chrX	1093112	1093216	-
chrX	1095586	1095732	-
chrX	1095778	1095874	-
chrX	1095921	1096012	-
chrX	1096065	1096132	-
chrX	1096181	1096309	-
chrX	1096831	1096977	-
chrX	1117239	1117532	-
chrX	1117653	1117776	-
chrX	1117821	1117822	-
chrX	1117858	1118068	-
chrX	1118080	1118084	-
chrX	1118085	1118443	-
chrX	1118461	1118576	-
chrX	1118631	1118734	-
chrX	1118779	1118831	-
chrX	1118839	1118863	-
chrX	1118877	1118879	-
chrX	1118881	1118893	-
chrX	1118901	1118915	-
chrX	1118932	1118977	-
chrX	1119022	1119124	-
chrX	1119154	1119286	-
chrX	1119331	1119404	-
chrX	1120186	1120214	-
chrX	1120215	1120231	-
chrX	1120248	1120291	-
chrX	1122440	1122681	-
chrX	1122911	1123028	-
chrX	1123591	1123729	-
chrX	1124053	1124193	-
chrX	1133112	1133144	-
chrX	1133192	1133292	-
chrX	1133690	1133799	-
chrX	1133844	1133934	-
chrX	1134114	1134458	-
chrX	1134490	1134498	-
chrX	1134569	1134714	-
chrX	1134761	1135019	-
chrX	1135063	1135266	-
chrX	1135397	1135492	-
chrX	1135537	1135660	-
chrX	1135708	1135860	-
chrX	1140855	1140979	-
chrX	1141232	1141302	-
chrX	1141353	1141701	-
chrX	1141747	1141932	-
chrX	1141974	1142240	-
chrX	1142283	1142365	-
chrX	1142616	1142752	-
chrX	1142803	1142887	-
chrX	1142938	1143036	-
chrX	1143084	1143293	-
chrX	1143482	1143588	-
chrX	1143631	1143890	-
chrX	1143974	1144196	-
chrX	1144550	1144790	-
chrX	1144844	1144924	-
chrX	1144968	1145058	-
chrX	1145197	1145277	-
chrX	1145330	1145435	-
chrX	1145539	1145948	-
chrX	1146241	1146319	-
chrX	1146363	1146471	-
chrX	1146620	1146942	-
chrX	1147402	1147518	-
chrX	1147659	1147733	-
chrX	1147808	1147969	-
chrX	1148282	1148407	-
chrX	1188550	1188687	-
chrX	1189463	1189513	-
chrX	1189546	1189663	-
chrX	1189838	1190006	-
chrX	1190211	1190467	-
chrX	1190516	1190590	-
chrX	1190677	1190749	-
chrX	1211839	1212056	-
chrX	1212338	1212416	-
chrX	1212549	1212667	-
chrX	1213044	1213501	-
chrX	1214001	1214303	-
chrX	1214635	1214924	-
chrX	1215268	1215387	-
chrX	1217942	1218031	-
chrX	1218078	1218157	-
chrX	1218405	1218522	-
chrX	1218903	1219057	-
chrX	1219167	1219259	-
chrX	1219870	1219871	-
chrX	1221226	1221240	-
chrX	1226316	1226326	-
chrX	1226332	1226347	-
chrX	1228865	1228902	-
chrX	1228938	1228950	-
chrX	1229969	1230101	-
chrX	1230255	1230399	-
chrX	1230695	1230748	-
chrX	1234006	1234144	-
chrX	1236220	1236225	-
chrX	1236285	1236372	-
chrX	1236498	1236550	-
chrX	1248639	1248644	-
chrX	1248730	1248839	-
chrX	1248852	1248863	-
chrX	1252001	1252094	-
chrX	1252104	1252127	-
chrX	1254977	1254980	-
chrX	1255031	1255036	-
chrX	1255046	1255119	-
chrX	1255127	1255180	-
chrX	1255235	1255385	-
chrX	1255499	1255623	-
chrX	1329146	1329310	-
chrX	1329861	1329939	-
chrX	1335399	1335596	-
chrX	1335644	1335850	-
chrX	1336598	1336614	-
chrX	1336622	1336912	-
chrX	1337553	1337651	-
chrX	1337789	1337901	-
chrX	1375243	1375261	-
chrX	1375262	1375359	-
chrX	1379512	1379660	-
chrX	1384364	1384462	-
chrX	1384530	1384542	-
chrX	1386255	1386326	-
chrX	1386333	1386427	-
chrX	1386954	1387000	-
chrX	1392226	1392356	-
chrX	1392407	1392483	-
chrX	1392538	1392589	-
chrX	1392591	1392625	-
chrX	1393030	1393130	-
chrX	1393665	1393796	-
chrX	1393854	1393988	-
chrX	1394110	1394224	-
chrX	1422044	1422262	-
chrX	1432970	1433128	-
chrX	1439303	1439476	-
chrX	1439529	1439643	-
chrX	1440051	1440258	-
chrX	1440467	1441126	-
chrX	1441180	1441354	-
chrX	1441537	1442171	-
chrX	1442232	1442437	-
chrX	1442488	1442621	-
chrX	1442676	1442775	-
chrX	1443147	1443311	-
chrX	1444143	1444170	-
chrX	1444313	1444351	-
chrX	1444357	1444412	-
chrX	1444414	1444668	-
chrX	1444768	1444871	-
chrX	1444918	1445011	-
chrX	1445169	1445691	-
chrX	1445701	1445887	-
chrX	1445921	1445943	-
chrX	1445951	1445965	-
chrX	1445970	1446640	-
chrX	1449967	1449975	-
chrX	1450000	1450064	-
chrX	1450132	1450449	-
chrX	1452236	1452523	-
chrX	1452574	1452677	-
chrX	1452721	1452856	-
chrX	1452905	1453651	-
chrX	1453699	1453861	-
chrX	1453960	1454073	-
chrX	1462807	1462889	-
chrX	1463171	1463205	-
chrX	1464313	1464376	-
chrX	1473862	1474078	-
chrX	1484957	1485044	-
chrX	1485203	1485457	-
chrX	1485475	1485505	-
chrX	1485666	1485894	-
chrX	1486032	1486058	-
chrX	1486076	1486214	-
chrX	1495143	1495326	-
chrX	1495683	1495759	-
chrX	1496808	1496887	-
chrX	1497549	1497677	-
chrX	1500255	1500517	-
chrX	1500564	1500617	-
chrX	1500712	1500853	-
chrX	1501602	1501763	-
chrX	1501768	1501818	-
chrX	1501851	1501852	-
chrX	1501866	1501931	-
chrX	1502546	1502786	-
chrX	1502819	1502919	-
chrX	1503986	1504120	-
chrX	1504124	1504143	-
chrX	1504226	1504826	-
chrX	1508977	1509235	-
chrX	1510554	1510847	-
chrX	1510897	1511132	-
chrX	1511261	1511419	-
chrX	1511636	1511684	-
chrX	1511886	1511966	-
chrX	1511979	1511986	-
chrX	1512155	1512772	-
chrX	1513158	1513347	-
chrX	1513705	1514016	-
chrX	1514618	1514903	-
chrX	1515569	1515685	-
chrX	1515732	1515848	-
chrX	1517044	1517158	-
chrX	1518893	1519122	-
chrX	1519148	1519197	-
chrX	1519209	1519434	-
chrX	1519511	1519516	-
chrX	1519566	1519716	-
chrX	1520213	1520253	-
chrX	1520259	1520284	-
chrX	1521053	1521199	-
chrX	1521356	1521487	-
chrX	1525938	1526033	-
chrX	1526377	1526421	-
chrX	1526579	1526606	-
chrX	1534428	1534545	-
chrX	1534602	1534775	-
chrX	1584505	1584740	-
chrX	1648151	1648230	-
chrX	1648252	1648275	-
chrX	1648293	1648295	-
chrX	1675232	1675380	-
chrX	1677056	1677093	-
chrX	1677175	1677189	-
chrX	1677243	1677272	-
chrX	1677399	1677506	-
chrX	1677817	1677852	-
chrX	1677905	1678113	-
chrX	1710898	1710941	-
chrX	1710960	1710989	-
chrX	1716608	1716710	-
chrX	1716753	1716782	-
chrX	1716798	1716800	-
chrX	1716846	1716863	-
chrX	1716904	1716915	-
chrX	1717052	1717253	-
chrX	1717257	1717267	-
chrX	1717339	1717362	-
chrX	1718450	1718559	-
chrX	1745234	1745460	-
chrX	1745510	1745654	-
chrX	1745660	1745779	-
chrX	1831626	1831748	-
chrX	1840568	1840894	-
chrX	1841231	1841314	-
chrX	1841943	1841967	-
chrX	1842080	1842149	-
chrX	1842295	1842394	-
chrX	1842600	1842691	-
chrX	1843006	1843123	-
chrX	1843347	1843458	-
chrX	1843690	1843786	-
chrX	1843935	1844016	-
chrX	1844065	1844149	-
chrX	1844241	1844508	-
chrX	1844876	1845103	-
chrX	1845475	1845531	-
chrX	1846613	1847382	-
chrX	1847748	1847956	-
chrX	1848038	1848390	-
chrX	1848624	1848669	-
chrX	1849654	1850363	-
chrX	1850932	1851042	-
chrX	1851070	1851507	-
chrX	1851556	1851719	-
chrX	1851915	1852012	-
chrX	1852127	1852539	-
chrX	1852593	1852614	-
chrX	1852670	1852730	-
chrX	1852897	1852984	-
chrX	1853878	1854124	-
chrX	1854127	1854145	-
chrX	1854159	1854174	-
chrX	1854233	1854250	-
chrX	1854271	1854654	-
chrX	1854825	1855396	-
chrX	1855446	1855549	-
chrX	1855600	1855892	-
chrX	1856084	1856166	-
chrX	1877486	1877576	-
chrX	1896754	1896910	-
chrX	1896940	1896958	-
chrX	1897040	1897272	-
chrX	1910993	1911149	-
chrX	1911153	1911182	-
chrX	1913108	1913161	-
chrX	1913227	1913232	-
chrX	1913258	1913265	-
chrX	1982699	1982923	-
chrX	1986485	1986972	-
chrX	1987020	1987310	-
chrX	1987441	1987576	-
chrX	1987624	1987771	-
chrX	1987817	1987928	-
chrX	1987974	1988226	-
chrX	1988229	1988234	-
chrX	1988237	1989130	-
chrX	1989215	1989496	-
chrX	1989541	1989599	-
chrX	1993879	1993888	-
chrX	1995641	1995671	-
chrX	1995688	1996020	-
chrX	1997833	1997836	-
chrX	1997925	1997933	-
chrX	1997934	1998115	-
chrX	1998848	1999025	-
chrX	2030968	2031242	-
chrX	2031289	2031493	-
chrX	2032355	2032490	-
chrX	2032799	2033026	-
chrX	2033076	2033165	-
chrX	2034982	2035117	-
chrX	2035170	2035239	-
chrX	2036110	2036190	-
chrX	2036246	2036409	-
chrX	2036874	2036995	-
chrX	2037047	2037143	-
chrX	2038025	2038179	-
chrX	2039401	2039877	-
chrX	2039933	2040059	-
chrX	2040110	2040121	-
chrX	2040124	2040152	-
chrX	2040157	2040272	-
chrX	2040302	2040800	-
chrX	2040839	2040972	-
chrX	2041007	2041160	-
chrX	2041272	2041474	-
chrX	2042056	2042210	-
chrX	2042216	2042232	-
chrX	2042330	2042425	-
chrX	2042566	2042700	-
chrX	2042845	2042949	-
chrX	2042959	2042971	-
chrX	2044120	2044133	-
chrX	2044711	2044713	-
chrX	2044752	2044784	-
chrX	2044827	2044851	-
chrX	2045828	2045918	-
chrX	2045946	2046168	-
chrX	2046172	2046326	-
chrX	2066616	2067059	-
chrX	2067109	2067199	-
chrX	2067296	2067373	-
chrX	2067444	2067746	-
chrX	2067800	2068200	-
chrX	2068274	2068424	-
chrX	2068508	2068746	-
chrX	2069114	2069155	-
chrX	2069218	2069229	-
chrX	2069271	2069287	-
chrX	2069293	2069456	-
chrX	2069464	2069491	-
chrX	2069519	2069582	-
chrX	2069681	2069968	-
chrX	2070237	2070437	-
chrX	2073930	2074225	-
chrX	2075156	2075217	-
chrX	2075459	2075516	-
chrX	2075571	2075638	-
chrX	2088629	2088644	-
chrX	2088872	2088984	-
chrX	2089197	2089288	-
chrX	2111432	2111963	-
chrX	2112030	2112333	-
chrX	2112377	2112502	-
chrX	2112558	2112721	-
chrX	2112779	2112921	-
chrX	2112971	2113101	-
chrX	2114029	2114129	-
chrX	2114714	2114903	-
chrX	2114947	2115065	-
chrX	2115115	2115245	-
chrX	2115340	2115464	-
chrX	2115514	2115587	-
chrX	2117396	2117574	-
chrX	2117617	2117743	-
chrX	2117744	2117794	-
chrX	2117838	2118038	-
chrX	2118085	2118180	-
chrX	2123437	2123773	-
chrX	2123787	2124185	-
chrX	2124655	2124664	-
chrX	2124700	2124706	-
chrX	2125006	2125162	-
chrX	2125210	2125531	-
chrX	2125595	2125734	-
chrX	2125871	2126061	-
chrX	2126113	2126539	-
chrX	2127027	2127277	-
chrX	2127327	2127649	-
chrX	2127810	2128102	-
chrX	2128528	2128678	-
chrX	2129763	2129845	-
chrX	2130066	2130236	-
chrX	2135664	2135740	-
chrX	2144640	2145392	-
chrX	2145474	2145643	-
chrX	2147334	2147422	-
chrX	2147460	2147476	-
chrX	2147778	2147806	-
chrX	2147895	2147937	-
chrX	2147942	2147946	-
chrX	2147992	2148014	-
chrX	2148015	2148022	-
chrX	2148866	2148877	-
chrX	2148921	2148950	-
chrX	2148997	2149093	-
chrX	2149177	2149284	-
chrX	2166107	2166219	-
chrX	2173969	2174160	-
chrX	2174789	2174948	-
chrX	2174994	2175115	-
chrX	2175163	2175268	-
chrX	2175315	2175419	-
chrX	2176214	2176406	-
chrX	2196519	2196825	-
chrX	2197049	2197308	-
chrX	2197363	2197478	-
chrX	2197522	2197651	-
chrX	2197699	2197781	-
chrX	2198905	2198985	-
chrX	2201928	2201985	-
chrX	2202151	2202276	-
chrX	2202322	2202408	-
chrX	2202491	2202612	-
chrX	2202664	2202898	-
chrX	2203028	2203140	-
chrX	2203184	2203283	-
chrX	2203557	2203633	-
chrX	2203680	2203884	-
chrX	2204253	2204386	-
chrX	2204434	2204612	-
chrX	2204677	2204858	-
chrX	2204911	2204969	-
chrX	2229089	2229318	-
chrX	2229319	2229338	-
chrX	2229832	2229851	-
chrX	2229858	2229869	-
chrX	2229934	2230094	-
chrX	2237243	2237385	-
chrX	2237409	2237415	-
chrX	2237417	2237428	-
chrX	2239100	2239208	-
chrX	2241658	2241728	-
chrX	2241756	2241932	-
chrX	2241977	2242157	-
chrX	2242204	2242423	-
chrX	2242471	2242612	-
chrX	2243531	2243648	-
chrX	2244155	2244163	-
chrX	2244175	2244249	-
chrX	2244259	2244260	-
chrX	2244743	2244758	-
chrX	2245349	2245569	-
chrX	2245615	2245631	-
chrX	2255905	2256339	-
chrX	2257213	2257372	-
chrX	2257429	2257692	-
chrX	2257750	2257829	-
chrX	2257877	2257979	-
chrX	2258030	2258053	-
chrX	2258235	2258254	-
chrX	2259209	2259416	-
chrX	2259477	2259657	-
chrX	2260012	2260520	-
chrX	2263297	2263516	-
chrX	2263868	2263976	-
chrX	2264022	2264088	-
chrX	2264149	2264213	-
chrX	2264262	2264334	-
chrX	2265378	2265380	-
chrX	2265447	2265578	-
chrX	2265728	2265735	-
chrX	2267935	2268090	-
chrX	2284018	2284200	-
chrX	2284225	2284232	-
chrX	2284305	2284394	-
chrX	2284451	2284644	-
chrX	2284696	2284877	-
chrX	2284922	2285023	-
chrX	2285428	2285518	-
chrX	2285834	2285927	-
chrX	2285968	2286068	-
chrX	2286146	2286268	-
chrX	2286344	2286362	-
chrX	2286370	2286388	-
chrX	2286397	2286536	-
chrX	2286540	2286565	-
chrX	2286591	2286593	-
chrX	2286602	2286702	-
chrX	2286783	2287021	-
chrX	2287083	2287180	-
chrX	2287210	2287420	-
chrX	2287489	2287695	-
chrX	2287839	2287847	-
chrX	2287848	2287863	-
chrX	2287882	2288090	-
chrX	2288532	2288584	-
chrX	2289502	2289525	-
chrX	2315169	2315499	-
chrX	2315549	2315773	-
chrX	2315814	2315817	-
chrX	2316538	2316617	-
chrX	2317279	2317354	-
chrX	2317406	2317470	-
chrX	2317714	2317715	-
chrX	2317728	2317730	-
chrX	2317881	2317958	-
chrX	2318069	2318213	-
chrX	2318271	2318276	-
chrX	2318332	2318372	-
chrX	2318448	2318619	-
chrX	2318665	2318735	-
chrX	2318784	2318853	-
chrX	2319023	2319033	-
chrX	2319239	2319292	-
chrX	2342737	2342781	-
chrX	2374805	2375034	-
chrX	2398892	2399155	-
chrX	2399210	2399335	-
chrX	2399750	2399899	-
chrX	2400276	2400352	-
chrX	2400406	2400640	-
chrX	2400688	2400803	-
chrX	2401363	2401443	-
chrX	2401758	2401867	-
chrX	2401922	2402028	-
chrX	2413165	2413299	-
chrX	2423757	2423759	-
chrX	2423786	2423848	-
chrX	2424006	2424013	-
chrX	2426871	2427002	-
chrX	2427419	2427425	-
chrX	2429974	2430226	-
chrX	2430251	2430574	-
chrX	2430720	2430869	-
chrX	2430919	2431014	-
chrX	2431033	2431059	-
chrX	2431239	2431497	-
chrX	2431550	2431773	-
chrX	2432029	2432065	-
chrX	2432242	2432298	-
chrX	2432406	2432478	-
chrX	2433588	2433772	-
chrX	2434725	2435189	-
chrX	2437222	2437371	-
chrX	2438248	2438338	-
chrX	2438663	2438728	-
chrX	2438903	2439163	-
chrX	2442903	2442923	-
chrX	2442937	2443398	-
chrX	2445220	2445424	-
chrX	2445483	2445638	-
chrX	2445652	2445659	-
chrX	2445671	2446593	-
chrX	2446638	2446783	-
chrX	2446838	2446975	-
chrX	2447065	2447179	-
chrX	2447182	2447193	-
chrX	2447217	2447225	-
chrX	2447334	2447828	-
chrX	2447841	2447851	-
chrX	2447898	2448028	-
chrX	2448151	2448282	-
chrX	2448328	2448734	-
chrX	2448753	2448842	-
chrX	2449203	2449255	-
chrX	2449276	2449303	-
chrX	2450122	2450123	-
chrX	2450333	2450498	-
chrX	2452933	2452946	-
chrX	2452954	2452975	-
chrX	2453266	2453291	-
chrX	2453308	2453387	-
chrX	2454099	2454106	-
chrX	2454243	2454329	-
chrX	2454925	2454929	-
chrX	2454938	2454989	-
chrX	2455879	2455970	-
chrX	2455981	2455989	-
chrX	2457122	2457211	-
chrX	2469260	2469295	-
chrX	2469900	2469943	-
chrX	2469949	2470028	-
chrX	2470138	2470184	-
chrX	2470191	2470252	-
chrX	2471095	2471161	-
chrX	2471654	2471706	-
chrX	2471711	2471757	-
chrX	2471811	2472022	-
chrX	2472075	2472163	-
chrX	2472213	2472292	-
chrX	2472297	2472332	-
chrX	2472979	2473205	-
chrX	2473250	2473401	-
chrX	2473452	2473676	-
chrX	2473760	2473799	-
chrX	2473812	2473829	-
chrX	2473837	2473979	-
chrX	2474034	2474297	-
chrX	2474349	2474495	-
chrX	2474534	2474717	-
chrX	2474900	2474994	-
chrX	2475038	2475164	-
chrX	2475210	2475368	-
chrX	2475420	2475571	-
chrX	2475615	2475827	-
chrX	2475875	2475952	-
chrX	2480786	2480953	-
chrX	2482089	2482205	-
chrX	2482251	2482432	-
chrX	2482603	2482780	-
chrX	2502251	2502263	-
chrX	2502309	2502373	-
chrX	2502418	2502470	-
chrX	2502909	2502989	-
chrX	2503045	2503068	-
chrX	2504256	2504357	-
chrX	2504949	2505132	-
chrX	2509360	2509862	-
chrX	2509918	2510096	-
chrX	2510270	2510374	-
chrX	2510425	2510554	-
chrX	2511049	2511209	-
chrX	2511254	2511406	-
chrX	2511454	2511521	-
chrX	2511526	2511561	-
chrX	2511618	2511766	-
chrX	2511881	2511990	-
chrX	2512114	2512300	-
chrX	2512353	2512426	-
chrX	2513287	2513408	-
chrX	2513455	2513653	-
chrX	2514153	2514259	-
chrX	2514830	2514953	-
chrX	2515154	2515310	-
chrX	2519330	2519337	-
chrX	2519365	2519428	-
chrX	2525247	2525855	-
chrX	2526030	2526130	-
chrX	2526131	2526146	-
chrX	2526315	2526371	-
chrX	2526598	2526875	-
chrX	2527239	2527637	-
chrX	2527702	2527770	-
chrX	2527838	2527945	-
chrX	2528137	2528268	-
chrX	2528353	2528537	-
chrX	2528608	2528720	-
chrX	2528864	2528968	-
chrX	2530736	2530778	-
chrX	2531142	2531266	-
chrX	2532074	2532091	-
chrX	2532230	2532392	-
chrX	2532405	2532410	-
chrX	2533285	2533286	-
chrX	2533349	2533367	-
chrX	2533467	2533481	-
chrX	2535133	2535146	-
chrX	2535171	2535309	-
chrX	2535313	2535345	-
chrX	2535352	2535419	-
chrX	2535574	2535614	-
chrX	2535812	2535887	-
chrX	2536128	2536335	-
chrX	2540082	2540342	-
chrX	2540393	2540395	-
chrX	2540424	2540521	-
chrX	2540905	2541048	-
chrX	2543416	2543472	-
chrX	2544660	2544676	-
chrX	2544681	2544691	-
chrX	2544701	2544809	-
chrX	2544815	2544819	-
chrX	2544837	2544846	-
chrX	2544856	2544868	-
chrX	2544937	2544981	-
chrX	2544983	2545013	-
chrX	2545060	2545180	-
chrX	2545198	2545219	-
chrX	2545269	2545340	-
chrX	2545984	2545995	-
chrX	2546012	2546051	-
chrX	2546082	2546087	-
chrX	2546177	2546195	-
chrX	2546203	2546207	-
chrX	2546230	2546231	-
chrX	2546238	2546364	-
chrX	2546424	2546551	-
chrX	2546928	2546954	-
chrX	2547136	2547177	-
chrX	2547805	2547868	-
chrX	2547919	2548031	-
chrX	2548863	2548964	-
chrX	2558002	2558147	-
chrX	2558159	2558203	-
chrX	2558207	2558213	-
chrX	2558563	2558667	-
chrX	2558669	2558675	-
chrX	2558710	2558802	-
chrX	2558860	2558868	-
chrX	2558907	2559080	-
chrX	2559130	2559236	-
chrX	2559286	2559425	-
chrX	2559501	2559508	-
chrX	2559731	2559993	-
chrX	2559997	2560265	-
chrX	2560310	2560489	-
chrX	2560532	2560908	-
chrX	2562006	2562269	-
chrX	2562506	2562755	-
chrX	2563735	2563876	-
chrX	2563922	2564141	-
chrX	2566676	2566885	-
chrX	2567594	2567698	-
chrX	2567748	2567856	-
chrX	2567902	2567972	-
chrX	2568023	2568160	-
chrX	2568166	2568184	-
chrX	2569094	2569352	-
chrX	2569508	2569562	-
chrX	2570537	2570543	-
chrX	2570642	2570806	-
chrX	2570850	2571032	-
chrX	2571086	2571245	-
chrX	2571291	2571411	-
chrX	2571456	2571553	-
chrX	2571953	2571997	-
chrX	2572009	2572102	-
chrX	2572103	2572167	-
chrX	2572340	2572495	-
chrX	2572548	2572640	-
chrX	2578318	2578526	-
chrX	2578580	2578783	-
chrX	2579123	2579130	-
chrX	2579142	2579219	-
chrX	2579290	2579330	-
chrX	2579333	2579430	-
chrX	2580090	2580260	-
chrX	2580307	2580409	-
chrX	2580452	2580573	-
chrX	2581827	2581882	-
chrX	2582820	2582912	-
chrX	2607536	2607570	-
chrX	2607572	2607584	-
chrX	2607652	2607717	-
chrX	2610865	2611571	-
chrX	2612619	2612712	-
chrX	2612760	2612847	-
chrX	2612893	2612959	-
chrX	2613009	2613135	-
chrX	2613372	2613650	-
chrX	2613696	2613809	-
chrX	2614132	2614213	-
chrX	2615438	2615534	-
chrX	2615575	2615720	-
chrX	2619413	2619506	-
chrX	2621314	2621539	-
chrX	2621687	2621822	-
chrX	2621872	2621948	-
chrX	2621977	2622076	-
chrX	2622467	2622579	-
chrX	2622625	2622788	-
chrX	2622835	2622917	-
chrX	2623616	2623700	-
chrX	2624164	2624404	-
chrX	2624451	2624646	-
chrX	2624687	2624801	-
chrX	2624851	2625037	-
chrX	2625082	2625151	-
chrX	2625198	2625251	-
chrX	2625259	2625263	-
chrX	2625267	2625319	-
chrX	2625373	2625531	-
chrX	2625545	2626063	-
chrX	2626504	2626984	-
chrX	2627034	2627249	-
chrX	2627419	2627538	-
chrX	2627593	2627660	-
chrX	2627936	2628092	-
chrX	2629538	2629665	-
chrX	2629684	2629766	-
chrX	2630655	2630810	-
chrX	2631965	2632022	-
chrX	2632134	2632253	-
chrX	2632254	2632302	-
chrX	2632442	2632522	-
chrX	2632538	2632552	-
chrX	2632659	2632691	-
chrX	2632735	2632736	-
chrX	2632737	2632745	-
chrX	2632811	2632970	-
chrX	2633731	2633831	-
chrX	2633848	2633854	-
chrX	2638771	2638799	-
chrX	2638800	2638829	-
chrX	2639759	2639776	-
chrX	2640170	2640326	-
chrX	2650058	2650124	-
chrX	2650177	2650277	-
chrX	2661934	2661959	-
chrX	2664116	2664122	-
chrX	2682828	2683319	-
chrX	2684000	2684267	-
chrX	2684353	2684737	-
chrX	2684804	2685029	-
chrX	2685046	2685084	-
chrX	2685171	2685190	-
chrX	2685231	2685254	-
chrX	2685275	2685288	-
chrX	2685457	2685573	-
chrX	2685622	2685742	-
chrX	2685857	2686055	-
chrX	2686093	2686112	-
chrX	2686157	2686181	-
chrX	2686189	2686193	-
chrX	2686210	2686458	-
chrX	2686503	2686712	-
chrX	2686764	2686932	-
chrX	2686978	2687067	-
chrX	2687131	2687176	-
chrX	2696654	2696796	-
chrX	2698281	2699402	-
chrX	2699454	2699500	-
chrX	2699791	2699835	-
chrX	2699850	2699865	-
chrX	2699878	2699978	-
chrX	2700107	2700113	-
chrX	2700124	2700207	-
chrX	2700238	2700387	-
chrX	2700443	2700584	-
chrX	2700651	2700657	-
chrX	2700709	2700744	-
chrX	2700982	2701141	-
chrX	2701420	2701431	-
chrX	2701461	2701725	-
chrX	2701760	2702302	-
chrX	2702357	2702485	-
chrX	2702528	2702661	-
chrX	2702920	2703029	-
chrX	2703120	2703199	-
chrX	2703521	2703657	-
chrX	2703804	2703815	-
chrX	2703838	2703842	-
chrX	2704008	2704161	-
chrX	2705100	2705102	-
chrX	2705229	2705277	-
chrX	2705496	2705755	-
chrX	2705797	2706021	-
chrX	2708710	2708804	-
chrX	2711124	2711127	-
chrX	2711141	2711776	-
chrX	2711971	2712072	-
chrX	2712347	2712351	-
chrX	2712367	2712507	-
chrX	2712637	2712724	-
chrX	2712779	2713078	-
chrX	2713100	2713107	-
chrX	2713122	2713178	-
chrX	2713268	2713389	-
chrX	2715084	2715113	-
chrX	2715118	2715140	-
chrX	2715154	2715172	-
chrX	2716000	2716101	-
chrX	2716149	2716362	-
chrX	2716907	2716932	-
chrX	2716972	2716979	-
chrX	2717100	2717407	-
chrX	2717480	2717482	-
chrX	2717487	2717506	-
chrX	2717510	2718110	-
chrX	2718796	2719532	-
chrX	2719533	2719540	-
chrX	2719567	2719579	-
chrX	2719629	2719735	-
chrX	2719837	2719883	-
chrX	2720162	2720269	-
chrX	2720811	2720849	-
chrX	2720864	2721098	-
chrX	2721147	2721360	-
chrX	2721410	2721531	-
chrX	2721576	2722004	-
chrX	2722051	2722179	-
chrX	2722292	2722341	-
chrX	2722634	2722772	-
chrX	2723087	2723124	-
chrX	2723227	2723454	-
chrX	2724075	2724144	-
chrX	2724256	2724404	-
chrX	2724456	2724495	-
chrX	2724496	2724729	-
chrX	2724816	2724944	-
chrX	2725136	2725173	-
chrX	2725208	2725232	-
chrX	2725236	2725305	-
chrX	2725434	2725754	-
chrX	2730530	2730627	-
chrX	2731411	2731499	-
chrX	2736142	2736195	-
chrX	2736220	2736351	-
chrX	2743585	2743734	-
chrX	2747799	2747938	-
chrX	2793594	2793626	-
chrX	2806348	2806391	-
chrX	2807101	2807232	-
chrX	2807276	2807386	-
chrX	2807996	2808187	-
chrX	2808246	2808288	-
chrX	2808294	2808299	-
chrX	2808354	2808435	-
chrX	2808705	2808873	-
chrX	2808919	2809095	-
chrX	2809559	2809623	-
chrX	2810651	2810701	-
chrX	2810749	2810809	-
chrX	2811244	2811252	-
chrX	2811273	2811303	-
chrX	2811976	2811980	-
chrX	2812015	2812082	-
chrX	2812892	2813050	-
chrX	2813782	2813916	-
chrX	2813931	2813964	-
chrX	2814009	2814056	-
chrX	2814101	2814116	-
chrX	2823589	2823664	-
chrX	2823710	2823796	-
chrX	2823869	2823886	-
chrX	2824970	2825099	-
chrX	2825167	2825308	-
chrX	2825361	2825460	-
chrX	2825593	2825722	-
chrX	2826656	2826819	-
chrX	2827738	2827838	-
chrX	2827843	2827887	-
chrX	2834228	2834733	-
chrX	2834950	2835223	-
chrX	2835337	2835358	-
chrX	2836030	2836125	-
chrX	2836180	2836789	-
chrX	2836839	2836939	-
chrX	2836991	2837138	-
chrX	2837184	2837278	-
chrX	2837375	2837499	-
chrX	2837526	2837538	-
chrX	2837540	2837680	-
chrX	2837698	2837704	-
chrX	2837735	2837855	-
chrX	2837908	2837982	-
chrX	2838537	2838645	-
chrX	2839350	2839396	-
chrX	2840230	2840286	-
chrX	2841252	2841496	-
chrX	2841513	2841613	-
chrX	2841635	2841654	-
chrX	2843947	2844552	-
chrX	2844600	2844987	-
chrX	2845044	2845156	-
chrX	2845909	2846026	-
chrX	2846079	2846203	-
chrX	2846248	2846866	-
chrX	2847593	2847724	-
chrX	2847774	2847911	-
chrX	2847958	2848043	-
chrX	2848252	2848278	-
chrX	2848288	2848377	-
chrX	2848379	2848402	-
chrX	2848406	2848408	-
chrX	2848798	2848923	-
chrX	2849172	2849417	-
chrX	2849476	2849635	-
chrX	2849685	2849775	-
chrX	2849834	2849996	-
chrX	2850044	2850108	-
chrX	2850154	2850316	-
chrX	2850867	2850954	-
chrX	2851247	2851391	-
chrX	2851417	2851429	-
chrX	2851445	2851473	-
chrX	2851489	2851544	-
chrX	2852082	2852102	-
chrX	2852145	2852152	-
chrX	2852154	2852169	-
chrX	2852277	2852474	-
chrX	2853729	2853980	-
chrX	2854032	2854159	-
chrX	2854423	2854745	-
chrX	2855155	2855257	-
chrX	2855269	2855305	-
chrX	2855333	2855384	-
chrX	2855389	2855414	-
chrX	2855466	2856013	-
chrX	2856066	2856266	-
chrX	2856370	2856428	-
chrX	2856457	2856469	-
chrX	2856475	2856506	-
chrX	2856796	2856953	-
chrX	2857047	2857112	-
chrX	2857120	2857126	-
chrX	2857162	2857359	-
chrX	2857367	2857373	-
chrX	2857513	2857514	-
chrX	2863934	2864017	-
chrX	2864027	2864032	-
chrX	2866022	2866161	-
chrX	2866222	2866272	-
chrX	2866287	2866290	-
chrX	2867299	2867323	-
chrX	2867339	2867367	-
chrX	2867368	2867429	-
chrX	2867480	2867593	-
chrX	2867681	2867779	-
chrX	2869063	2869064	-
chrX	2869075	2869142	-
chrX	2869191	2869293	-
chrX	2869342	2869567	-
chrX	2870838	2870887	-
chrX	2870970	2871098	-
chrX	2872774	2873548	-
chrX	2874518	2874780	-
chrX	2874932	2875062	-
chrX	2875081	2875082	-
chrX	2875171	2875181	-
chrX	2875201	2875301	-
chrX	2876377	2876475	-
chrX	2876526	2876629	-
chrX	2876647	2876746	-
chrX	2876941	2877100	-
chrX	2877251	2877525	-
chrX	2877607	2877804	-
chrX	2877818	2877984	-
chrX	2879458	2879577	-
chrX	2884338	2884371	-
chrX	2890631	2891370	-
chrX	2891918	2892020	-
chrX	2892507	2892547	-
chrX	2892552	2892664	-
chrX	2892667	2892804	-
chrX	2893131	2893134	-
chrX	2893268	2893282	-
chrX	2893283	2893392	-
chrX	2895581	2895683	-
chrX	2895963	2896066	-
chrX	2897905	2898091	-
chrX	2898169	2898269	-
chrX	2918696	2919000	-
chrX	2919049	2919337	-
chrX	2919386	2919541	-
chrX	2923744	2923973	-
chrX	2946146	2946169	-
chrX	2946178	2946202	-
chrX	2946219	2946221	-
chrX	2946222	2946374	-
chrX	2946376	2946417	-
chrX	2946460	2946492	-
chrX	2971481	2971574	-
chrX	2972292	2972350	-
chrX	2972370	2972418	-
chrX	2980025	2980264	-
chrX	3012181	3012354	-
chrX	3012403	3012497	-
chrX	3012547	3012710	-
chrX	3012756	3012810	-
chrX	3012858	3013008	-
chrX	3013057	3013150	-
chrX	3014192	3014276	-
chrX	3014485	3014599	-
chrX	3014622	3014631	-
chrX	3014641	3014653	-
chrX	3014659	3014683	-
chrX	3018393	3018396	-
chrX	3036518	3036891	-
chrX	3036904	3037053	-
chrX	3037438	3037502	-
chrX	3037547	3037660	-
chrX	3038519	3038798	-
chrX	3038847	3039016	-
chrX	3040404	3040431	-
chrX	3041987	3042159	-
chrX	3042303	3042450	-
chrX	3043083	3043099	-
chrX	3043113	3043387	-
chrX	3043470	3043558	-
chrX	3043604	3043695	-
chrX	3043715	3043886	-
chrX	3044388	3044501	-
chrX	3044549	3044707	-
chrX	3044797	3044979	-
chrX	3045732	3045832	-
chrX	3050510	3050556	-
chrX	3051245	3051424	-
chrX	3051508	3051646	-
chrX	3051695	3051822	-
chrX	3051986	3052001	-
chrX	3052827	3052835	-
chrX	3052873	3052970	-
chrX	3053015	3053207	-
chrX	3053246	3053252	-
chrX	3053253	3053314	-
chrX	3053360	3053483	-
chrX	3053538	3053681	-
chrX	3053725	3053858	-
chrX	3054291	3054341	-
chrX	3054387	3054403	-
chrX	3054414	3054487	-
chrX	3068862	3068953	-
chrX	3069033	3069171	-
chrX	3069649	3069669	-
chrX	3069715	3069725	-
chrX	3069735	3069862	-
chrX	3070140	3070369	-
chrX	3085899	3086402	-
chrX	3086460	3086652	-
chrX	3086864	3087017	-
chrX	3087065	3087166	-
chrX	3087218	3087329	-
chrX	3092410	3092895	-
chrX	3092946	3093051	-
chrX	3093099	3093349	-
chrX	3093426	3093502	-
chrX	3093551	3093716	-
chrX	3093773	3093869	-
chrX	3093919	3094111	-
[truncated: 149,833 more rows]
